# Supplementary material for: Analysis of NIH K99/R00 Awards and the Career Progression of Awardees
Source: bioRxiv preprint, doi:10.1101/2023.01.26.525751, version 16 (2023-12-29)
Supplement: Fig 7-supplementary figure 1 source data [file 525751_file20.xlsx]

## Sheet: Sheet1
	Stanford			Harvard			Yale			U of Michigan			Pitt			Johns Hopkins			University_of_Wisconsin-Madison			Washington_University_St_Louis			UW			UNC			Duke			Emory			UPenn			UC_San_Francisco			UC_San_Diego			UCLA			UC_Berkeley
Stanford	48		Harvard	200		Yale	72		University_of_Michigan	143		University_of_Pittsburgh	237		Johns_Hopkins	251		University_of_Wisconsin-Madison	110		Washington_University_St_Louis	44		UW	180		UNC	191		Duke	65		Emory	62		UPenn	134		UC_San_Francisco	198		UC_San_Diego	51		UCLA	105		UC_Berkeley	49
Harvard	35		MIT	35		Harvard	37		Harvard	40		Johns_Hopkins	29		Harvard	46		University_of_Michigan	19		Harvard	27		UC_Berkeley	39		Duke	42		UNC	44		UNC	23		Harvard	31		UC_Berkeley	82		UC_San_Francisco	38		Harvard	48		Stanford	22
Yale	17		Stanford	27		UPenn	23		University_of_Wisconsin-Madison	24		University_of_Michigan	26		UPenn	31		University_of_Minnesota_Twin_Cities	18		University_of_Wisconsin-Madison	18		Stanford	28		Johns_Hopkins	35		Harvard	40		Harvard	21		Cornell	22		Harvard	55		Harvard	33		UC_Berkeley	28		Harvard	20
UC_Berkeley	16		Yale	23		Columbia	18		Stanford	20		Harvard	21		UC_Berkeley	30		Cornell	17		UC_San_Diego	15		Harvard	23		University_of_Michigan	30		Cornell	25		UPenn	17		Johns_Hopkins	18		Stanford	26		Stanford	29		Stanford	23		MIT	15
UPenn	13		Johns_Hopkins	21		MIT	18		UNC	20		Penn_State	18		UNC	27		Harvard	14		University_of_Michigan	15		UC_San_Francisco	21		Harvard	26		Stanford	17		Johns_Hopkins	16		University_of_Michigan	18		UC_San_Diego	22		UC_Berkeley	26		UC_San_Francisco	23		UC_San_Francisco	13
UC_San_Francisco	12		UC_Berkeley	19		Stanford	18		Wayne_State	19		University_of_Wisconsin-Madison	17		Stanford	25		UC_Berkeley	13		University_of_Illinois_Urbana-Champaign	14		Johns_Hopkins	19		University_of_Wisconsin-Madison	23		University_of_Wisconsin-Madison	16		UC_Berkeley	15		Yale	15		Johns_Hopkins	18		MIT	15		Johns_Hopkins	19		Caltech	11
Columbia	10		Rockefeller_University	17		Johns_Hopkins	15		UC_Berkeley	18		Ohio_State_University	16		Yale	25		UNC	13		Duke	13		University_of_Wisconsin-Madison	18		North_Carolina_State	16		Yale	16		UW	15		NYU	14		MIT	17		Johns_Hopkins	14		University_of_Wisconsin-Madison	19		University_of_Michigan	10
UC_San_Diego	9		Washington_University_St_Louis	17		UC_San_Francisco	12		UC_San_Francisco	16		UC_Berkeley	16		MIT	23		University_of_Illinois_Urbana-Champaign	11		UW	12		UCLA	17		University_of_Virginia	16		UC_Berkeley	14		Duke	14		Stanford	14		University_of_Southern_California	17		UCLA	13		Yale	17		Johns_Hopkins	9
UW	9		University_of_Michigan	15		UConn	12		UPenn	15		UPenn	15		University_of_Michigan	16		UPenn	11		Johns_Hopkins	11		UNC	17		UPenn	16		University_of_Michigan	14		University_of_Michigan	14		Columbia	12		UW	15		UW	13		Caltech	15		UCLA	8
Washington_University_St_Louis	9		Princeton	14		UC_Berkeley	11		University_of_Illinois_Urbana-Champaign	14		UW	14		University_of_Chicago	15		Stanford	10		Stanford	10		University_of_Minnesota_Twin_Cities	17		Cornell	15		UCLA	13		Cornell	13		UW	12		UPenn	14		Caltech	11		Columbia	15		UW	7
MIT	8		Tufts	14		Rockefeller_University	10		UW	14		University_of_Illinois_Urbana-Champaign	13		University_of_Maryland_College_Park	14		UW	9		UC_Berkeley	10		University_of_Michigan	16		UC_San_Diego	15		University_of_Chicago	13		Georgia_Tech	10		Penn_State	11		Yale	13		University_of_Wisconsin-Madison	11		University_of_Michigan	13		University_of_Cambridge	6
UCLA	8		Caltech	13		University_of_Michigan	10		Johns_Hopkins	12		Yale	12		University_of_Rochester	14		Washington_University_St_Louis	9		UPenn	10		University_of_Chicago	13		UT_Austin	15		MIT	12		University_of_Alabama_at_Birmingham	10		Temple	10		UCLA	12		Yale	11		UPenn	13		Yale	6
Caltech	7		Boston_University	12		University_of_Wisconsin-Madison	10		University_of_Minnesota_Twin_Cities	12		Carnegie_Mellon	11		George_Washington	13		Yale	9		MIT	8		Duke	11		UW	15		Northwestern	12		Northwestern	8		UCLA	10		UNC	12		UNC	10		MIT	12		University_of_Chicago	5
Duke	7		Case_Western_Reserve	12		NYU	8		UC_San_Diego	11		Duke	11		NYU	13		Johns_Hopkins	8		Yale	8		UC_San_Diego	9		Yale	15		University_of_Virginia	12		University_of_Georgia	8		University_of_Chicago	8		Cornell	11		UPenn	10		University_of_Southern_California	11		Columbia	4
Johns_Hopkins	7		UPenn	12		UCLA	8		UCLA	11		MIT	11		Ohio_State_University	13		UC_San_Diego	8		Columbia	7		Oregon_Health_&_Science	8		UCLA	14		UW	12		University_of_Wisconsin-Madison	8		University_of_Wisconsin-Madison	8		Caltech	10		Cornell	9		Cornell	10		NYU	4
Princeton	5		NYU	11		Cornell	7		Yale	11		UNC	11		Penn_State	13		Ohio_State_University	7		Saint_Louis_University	7		University_of_Oxford	8		UC_Berkeley	13		North_Carolina_State	11		Vanderbilt	8		UC_Berkeley	7		Duke	10		University_of_Michigan	8		University_of_Minnesota_Twin_Cities	9		Rockefeller_University	4
UNC	5		UC_San_Francisco	11		University_of_Chicago	7		Duke	10		University_of_Minnesota_Twin_Cities	11		University_of_Maryland_Baltimore	13		UC_Davis	7		Northwestern	6		MIT	7		University_of_Pittsburgh	13		NYU	11		Yale	8		UC_San_Diego	7		Washington_University_St_Louis	9		Columbia	7		UW	9		UC_San_Diego	4
Icahn_School_of_Medicine	4		UCLA	11		UNC	6		Cornell	9		Washington_University_St_Louis	11		Cornell	12		University_of_Chicago	7		SUNY_Stony_Brook	6		UMass_Amherst	7		Penn_State	12		UPenn	11		Columbia	7		University_of_Oxford	7		Case_Western_Reserve	7		UC_Davis	7		UC_San_Diego	8		University_of_Oregon	4
Tufts	4		Cornell	10		Duke	5		Michigan_State	9		University_of_Chicago	10		Duke	12		University_of_Iowa	7		UC_Irvine	6		University_of_Illinois_Urbana-Champaign	7		University_of_Chicago	12		Princeton	10		Georgia_State	7		University_of_Virginia	7		Columbia	7		University_of_Chicago	7		Princeton	7		UT_Austin	4
University_of_Michigan	4		Duke	10		Emory	5		Ohio_State_University	9		UC_San_Diego	9		University_of_Wisconsin-Madison	12		MIT	6		Boston_University	5		University_of_Utah	7		University_of_Florida	12		Johns_Hopkins	9		Stanford	7		Baylor_College_of_Medicine	6		Rockefeller_University	7		University_of_Minnesota_Twin_Cities	7		UC_Davis	7		Brandeis	3
UT_Health_Science_Center_at_Houston	4		Northwestern	10		UC_San_Diego	5		Penn_State	9		Northwestern	8		Brown	10		Northwestern	6		Case_Western_Reserve	5		UPenn	7		Princeton	11		Boston_University	7		University_of_Chicago	7		Emory	6		University_of_Cambridge	7		University_of_Toronto	7		University_of_Chicago	7		Cornell	3
Baylor_College_of_Medicine	3		University_of_Rochester	10		University_of_Rochester	5		University_of_Virginia	9		UC_San_Francisco	8		Northwestern	10		Purdue	6		UNC	5		Columbia	6		Stanford	11		Rockefeller_University	7		UC_Davis	6		Ohio_State_University	6		University_of_Florida	7		Duke	6		Albert_Einstein_College_of_Medicine	6		Duke	3
Cornell	3		University_of_Wisconsin-Madison	10		University_of_Southern_California	5		University_of_Chicago	8		Columbia	7		Case_Western_Reserve	9		UC_San_Francisco	6		University_of_Chicago	5		Cornell	6		Caltech	10		UC_San_Diego	7		UC_San_Francisco	6		Princeton	6		University_of_Illinois_Urbana-Champaign	7		UC_Irvine	6		Duke	6		Ohio_State_University	3
CU_Boulder	3		Columbia	8		Wayne_State	5		Washington_University_St_Louis	8		Stanford	7		Columbia	9		University_of_Arizona	6		UT_Austin	5		Emory	6		UC_San_Francisco	10		Columbia	6		University_of_Iowa	6		Rutgers_New_Brunswick	6		University_of_Wisconsin-Madison	7		University_of_Cambridge	6		NYU	6		Princeton	3
Georgetown	3		University_at_Buffalo_(SUNY)	8		Boston_University	4		Carnegie_Mellon	7		UConn	7		University_of_Southern_California	9		University_of_Florida	6		Baylor	4		Michigan_State	6		University_of_Minnesota_Twin_Cities	10		University_of_Pittsburgh	6		University_of_Oxford	6		Thomas_Jefferson	6		University_of_Chicago	6		University_of_Iowa	6		Rockefeller_University	6		UC_Davis	3
SUNY_Stony_Brook	3		University_of_Cambridge	8		Brown	4		Columbia	7		University_of_Alabama_at_Birmingham	7		University_of_Virginia	9		Columbia	5		Caltech	4		Tufts	6		University_of_Rochester	10		Rutgers_New_Brunswick	5		University_of_Pittsburgh	6		UC_San_Francisco	6		University_of_Michigan	6		Princeton	5		University_of_Arizona	6		UNC	3
UC_Davis	3		Mcgill_University	7		Case_Western_Reserve	4		Purdue	7		University_of_Illinois_Chicago	7		UT_Austin	9		Iowa_State	5		George_Washington	4		University_of_Kansas	6		University_of_Tennessee	10		Washington_University_St_Louis	5		University_of_South_Carolina	6		Georgetown	5		University_of_Rochester	6		University_of_Illinois_Urbana-Champaign	5		University_of_Illinois_Urbana-Champaign	6		University_of_London	3
University_of_Chicago	3		UNC	7		Ohio_State_University	4		University_of_Maryland_College_Park	7		University_of_Iowa	7		UCLA	8		UT_Austin	5		Princeton	4		Caltech	5		Columbia	9		Penn_State	4		Indiana_University_Bloomington	5		MIT	5		Princeton	5		Albert_Einstein_College_of_Medicine	4		Brown	5		University_of_Melbourne	3
University_of_Rochester	3		Albert_Einstein_College_of_Medicine	6		University_of_London	4		University_of_Pittsburgh	7		Cornell	6		UConn	8		Caltech	4		University_of_Minnesota_Twin_Cities	4		Northwestern	5		University_of_Georgia	9		UC_San_Francisco	4		MIT	5		University_of_Cambridge	5		University_of_Illinois_Chicago	5		Scripps_Research_(California)	4		University_of_Cambridge	5		University_of_Minnesota_Twin_Cities	3
UT_Austin	3		University_of_Maryland_College_Park	6		University_of_Minnesota_Twin_Cities	4		University_of_Toronto	7		NYU	6		Washington_University_St_Louis	8		Michigan_State	4		Cornell	3		Princeton	5		University_of_Kentucky	9		University_of_Florida	4		NYU	5		University_of_Minnesota_Twin_Cities	5		University_of_London	5		University_at_Buffalo_(SUNY)	4		University_of_Oregon	5		University_of_Southern_California	3
UT_Southwestern_Medical_Center_at_Dallas	3		University_of_Vermont	6		University_of_Oxford	4		UT_Southwestern_Medical_Center_at_Dallas	7		SUNY_Stony_Brook	6		University_of_Illinois_Urbana-Champaign	7		Penn_State	4		Michigan_State	3		Rockefeller_University	5		University_of_Toronto	9		University_of_Iowa	4		University_of_Arizona	5		UT_Austin	5		University_of_Oxford	5		University_of_Pittsburgh	4		Georgia_State	4		University_of_Wisconsin-Madison	3
Boston_University	2		UW	6		Brandeis	3		MIT	6		UCLA	6		Albert_Einstein_College_of_Medicine	6		UCLA	4		NYU	3		Universidad_Nacional_Autonoma_de_Mexico	5		Vanderbilt	9		University_of_Miami	4		University_of_Florida	5		Duke	4		University_of_Toronto	5		Virginia_Commonwealth	4		Michigan_State	4		Arizona_State	2
Brandeis	2		Brandeis	5		Chinese_Academy_of_Sciences	3		UConn	6		University_of_Kansas	6		Caltech	6		UMass_Amherst	4		UCLA	3		University_of_Arizona	5		Washington_University_St_Louis	9		Vanderbilt	4		University_of_Minnesota_Twin_Cities	5		Rockefeller_University	4		Albert_Einstein_College_of_Medicine	4		Baylor_College_of_Medicine	3		Northwestern	4		Australian_National_University	2
City_University_of_New_York_The	2		Thomas_Jefferson	5		George_Washington	3		UT_Austin	6		University_of_Maryland_Baltimore	6		Colorado_State	6		University_of_Alabama_at_Birmingham	4		University_of_Virginia	3		University_of_Vermont	5		Arizona_State	8		Brandeis	3		University_of_Toronto	5		UNC	4		London_School_Of_Hygiene_and_Tropical_Medicine	4		Boston_University	3		Tufts	4		Hebrew_University_of_Jerusalem	2
Drexel	2		University_of_Chicago	5		New_York_Medical_College	3		Arizona_State	5		University_of_Milan	6		University_at_Buffalo_(SUNY)	6		University_of_Georgia	4		Arizona_State	2		Vanderbilt	5		Brown	8		Brown	3		Augusta	4		University_at_Buffalo_(SUNY)	4		UC_Davis	4		Emory	3		University_of_British_Columbia	4		Indiana_University_Bloomington	2
Hebrew_University_of_Jerusalem	2		University_of_Oxford	5		Purdue	3		Indiana_University_Bloomington	5		University_of_Utah	6		University_of_Illinois_Chicago	6		University_of_Missouri	4		Brandeis	2		Yale	5		Case_Western_Reserve	8		Caltech	3		UC_Irvine	4		University_College_London	4		University_of_Missouri	4		Lomonosov_Moscow_State_University	3		University_of_Toronto	4		Mcgill_University	2
Indiana_University_Bloomington	2		University_of_Pittsburgh	5		Seoul_National_University	3		University_of_Illinois_Chicago	5		University_of_Virginia	6		University_of_Minnesota_Twin_Cities	6		University_of_Rochester	4		Brown	2		Carnegie_Mellon	4		MIT	8		Case_Western_Reserve	3		University_of_Edinburgh	4		University_of_Buenos_Aires	4		Chinese_Academy_of_Sciences	3		Oregon_Health_&_Science	3		Washington_University_St_Louis	4		Penn_State	2
National_Autonomous_University_of_Mexico	2		Baylor_College_of_Medicine	4		University_at_Buffalo_(SUNY)	3		University_of_Iowa	5		Academy_of_Sciences_Russia	5		Princeton	5		Brown	3		Colorado_State	2		Case_Western_Reserve	4		UC_Davis	8		Chinese_Academy_of_Sciences	3		University_of_Illinois_Urbana-Champaign	4		University_of_Georgia	4		CU_Boulder	3		Rutgers_New_Brunswick	3		Arizona_State	3		SUNY_Stony_Brook	2
Ohio_State_University	2		Brown	4		University_of_Cambridge	3		University_of_Western_Ontario	5		Case_Western_Reserve	5		Purdue	5		Carnegie_Mellon	3		CU_Boulder	2		CU_Boulder	4		University_of_Iowa	8		LSU	3		Washington_University_St_Louis	4		University_of_Illinois_Chicago	4		Drexel	3		UC_Riverside	3		Baylor_College_of_Medicine	3		UC_Riverside	2
Technical_University_of_Munich	2		Dartmouth	4		University_of_Illinois_Chicago	3		Boston_University	4		Michigan_State	5		Technical_University_of_Munich	5		Hebrew_University_of_Jerusalem	3		Emory	2		Monash_University	4		University_of_Maryland_College_Park	8		Mcgill_University	3		Boston_University	3		University_of_Missouri	4		Erasmus_University_Rotterdam	3		University_College_Dublin	3		Boston_University	3		UC_Santa_Barbara	2
Tel_Aviv_University	2		Icahn_School_of_Medicine	4		University_of_Illinois_Urbana-Champaign	3		Brown	4		University_of_Florida	5		Tufts	5		Indiana_University_Bloomington	3		Hirszfeld_Institute_and_Basel_Institute_for_Immunology	2		Penn_State	4		Purdue	7		UConn	3		Brown	3		University_of_Pittsburgh	4		Max_Planck_Institute	3		University_of_Arizona	3		ETH_Zurich	3		University_of_Iowa	2
The_Weizmann_Institute_of_Science	2		Ludwig-Maximilians-Universität_München	4		UW	3		Case_Western_Reserve	4		University_of_Nebraska-Lincoln	5		UC_San_Francisco	5		Marquette	3		Jawaharlal_Nehru_University	2		UC_Davis	4		SUNY_Stony_Brook	7		University_College_London	3		Case_Western_Reserve	3		University_of_Tokyo	4		Mcmaster_University	3		University_of_Buenos_Aires	3		Indiana_University_Bloomington	3		University_of_New_South_Wales	2
UC_Irvine	2		Sapienza_Università_di_Roma	4		Albert_Einstein_College_of_Medicine	2		Rice	4		University_of_Rochester	5		UW	5		Princeton	3		Leiden_University	2		University_of_Iowa	4		UC_Irvine	7		University_of_Georgia	3		CU_Boulder	3		Academy_of_Sciences_Russia	3		NYU	3		University_of_Georgia	3		Ludwig-Maximilians-Universität_München	3		University_of_Pittsburgh	2
UMass_Amherst	2		SUNY_Stony_Brook	4		Australian_National_University	2		University_of_Arizona	4		Wayne_State	5		Boston_University	4		University_at_Buffalo_(SUNY)	3		LSU	2		University_of_New_Mexico	4		University_of_Illinois_Urbana-Champaign	7		University_of_London	3		Michigan_State	3		Colorado_State	3		Ohio_State_University	3		University_of_Rhode_Island	3		Ohio_State_University	3		University_of_Utah	2
University_College_London	2		Temple	4		Autonomous_University_of_Madrid	2		University_of_Oxford	4		West_Virginia	5		CU_Boulder	4		University_of_Utah	3		National_Yang-Ming_University	2		University_of_Pittsburgh	4		University_of_Kansas	7		University_of_Rochester	3		Penn_State	3		Drexel	3		Purdue	3		University_of_Southern_California	3		SUNY_Stony_Brook	3		UPenn	2
University_of_Athens	2		UC_San_Diego	4		Beijing_Medical_University	2		University_of_Rochester	4		Drexel	4		Georgetown	4		University_of_Wisconsin-Milwaukee	3		Osaka_University	2		University_of_Queensland	4		Lomonosov_Moscow_State_University	6		University_of_Southern_California	3		Purdue	3		Ludwig-Maximilians-Universität_München	3		UC_Santa_Cruz	3		University_of_Utah	3		UConn	3		Utrecht_University	2
University_of_British_Columbia	2		University_of_Illinois_Chicago	4		Boston_College	2		University_of_Tokyo	4		Indiana_University_Bloomington	4		Indiana_University_Bloomington	4		Vanderbilt	3		Purdue	2		University_of_Rochester	4		Michigan_State	6		UT_Austin	3		Rockefeller_University	3		Mcgill_University	3		University_of_Arizona	3		Albany_Medical_College	2		UNC	3		Vanderbilt	2
University_of_Cambridge	2		University_of_Minnesota_Twin_Cities	4		CU_Denver	2		Vanderbilt	4		Lomonosov_Moscow_State_University	4		Rockefeller_University	4		Virginia_Tech	3		Rockefeller_University	2		University_of_Southern_California	4		Northwestern	6		Augusta	2		Tulane	3		North_Carolina_State	3		University_of_Barcelona	3		Arizona_State	2		University_of_London	3		Bogomoletz_Institute_of_Physiology	1
University_of_Edinburgh	2		University_of_New_South_Wales	4		Dartmouth	2		Albert_Einstein_College_of_Medicine	3		Mcgill_University	4		UC_San_Diego	4		Boston_University	2		Syracuse	2		University_of_Toronto	4		University_of_Illinois_Chicago	6		Catholic_University_of_America	2		UCLA	3		Northwestern	3		University_of_Kansas	3		Australian_National_University	2		University_of_Nebraska-Lincoln	3		Boston_University	1
University_of_Illinois_Urbana-Champaign	2		University_of_Toronto	4		European_Molecular_Biology_Laboratory	2		Dartmouth	3		Seoul_National_University	4		UC_Santa_Barbara	4		Case_Western_Reserve	2		The_Weizmann_Institute_of_Science	2		University_of_Virginia	4		Wake_Forest	6		CU_Boulder	2		University_at_Buffalo_(SUNY)	3		Oregon_State	3		University_of_Minnesota_Twin_Cities	3		California_School_of_Professional_Psychology_San_Diego	2		UT_Health_Science_Center_at_Houston	3		Brown	1
University_of_Manitoba	2		University_of_Virginia	4		Friedrich-Alexander_University_of_Erlangen-Nurnberg	2		Emory	3		Temple	4		University_of_Oregon	4		Charles_University_in_Prague	2		University_at_Buffalo_(SUNY)	2		Washington_University_St_Louis	4		West_Virginia	6		ETH_Zurich	2		University_of_Glasgow	3		Saint_Louis_University	3		UT_Southwestern_Medical_Center_at_Dallas	3		Cardiff_University	2		UT_Southwestern_Medical_Center_at_Dallas	3		Chiba_University	1
University_of_Oxford	2		UT_Southwestern_Medical_Center_at_Dallas	4		Hebrew_University_of_Jerusalem	2		ETH_Zurich	3		The_Weizmann_Institute_of_Science	4		University_of_Pittsburgh	4		Colorado_State	2		University_of_Alberta	2		Boston_University	3		Emory	5		Florida_State	2		University_of_Missouri	3		San_Diego_State	3		Baylor_College_of_Medicine	2		CU_Boulder	2		Vanderbilt	3		City_University_of_New_York_The	1
Vanderbilt	2		Weill_Cornell_Medicine	4		IUPUI	2		Mcgill_University	3		UC_Davis	4		University_of_Vermont	4		CU_Boulder	2		University_of_Arizona	2		Brown	3		Indiana_University_Bloomington	5		Georgia_Tech	2		University_of_Rochester	3		SUNY_Stony_Brook	3		Boston_University	2		CU_Denver	2		City_University_of_New_York_The	2		Delft_University_of_Technology	1
Virginia_Tech	2		Albany_Medical_College	3		Joseph_Fourier_University	2		Medical_University_of_South_Carolina	3		UMass_Amherst	4		University_of_Waterloo	4		CU_Denver	2		University_of_Bordeaux	2		Colorado_State	3		NYU	5		Indian_Institute_of_Science	2		University_of_South_Florida	3		Texas_A&M	3		Brown	2		Dartmouth	2		Cold_Spring_Harbor	2		Emory	1
Wageningen_University	2		CU_Boulder	3		Medical_University_of_South_Carolina	2		Rensselaer_Polytechnic_Institute	3		University_at_Buffalo_(SUNY)	4		UT_Southwestern_Medical_Center_at_Dallas	4		Duke	2		University_of_Geneva	2		CU_Denver	3		Rutgers_New_Brunswick	5		Indiana_University_Bloomington	2		Caltech	2		Tufts	3		CU_Denver	2		Illinois_Tech	2		CU_Boulder	2		European_Molecular_Biology_Laboratory	1
Weill_Cornell_Medicine	2		Georgetown	3		Michigan_State	2		Thomas_Jefferson	3		University_of_British_Columbia	4		West_Virginia	4		Emory	2		University_of_Havana	2		Ohio_State_University	3		University_of_South_Carolina	5		Mcmaster_University	2		East_Carolina	2		UC_Davis	3		Emory	2		Indiana_University_Bloomington	2		Dalhousie_University	2		Icahn_School_of_Medicine	1
Albert_Einstein_College_of_Medicine	1		Hebrew_University_of_Jerusalem	3		North_Carolina_State	2		UC_Davis	3		University_of_Miami	4		Auburn	3		Eotvos_Lorand_University	2		University_of_Illinois_Chicago	2		UC_Riverside	3		Washington_State	5		Montana_State	2		Florida_State	2		UC_Santa_Barbara	3		Florida_A&M	2		IUPUI	2		Havana_Advanced_Institute_Of_Medical_Sciences	2		Keio_University	1
Dartmouth	1		Michigan_State	3		Princeton	2		UMass_Amherst	3		University_of_Oklahoma	4		Catholic_University_of_America	3		Kansas_State	2		University_of_Iowa	2		University_of_Cambridge	3		Boston_College	4		Ohio_State_University	2		Hokkaido_University	2		University_of_Barcelona	3		Icahn_School_of_Medicine	2		Mcgill_University	2		Leiden_University	2		Max_Planck_Institute_for_Evolutional_Anthropology	1
Eastern_Virginia_Medical_School	1		National_University_of_Ireland	3		Rice	2		University_of_Calgary	3		UT_Health_Science_Center_at_Houston	4		Chinese_Academy_of_Sciences	3		LSU	2		University_of_Maryland_Baltimore_County	2		University_of_Chile	3		Boston_University	4		Oregon_Health_&_Science	2		Indian_Institute_of_Science	2		University_of_British_Columbia	3		Karolinska_Institute	2		Medical_College_of_Virginia_Richmond	2		Mcmaster_University	2		Max_Planck_Institute_of_Biochemistry	1
European_Molecular_Biology_Laboratory	1		Ohio_State_University	3		Rutgers_New_Brunswick	2		University_of_Cincinnati	3		Vanderbilt	4		Dartmouth	3		Mcmaster_University	2		University_of_Milan	2		University_of_Georgia	3		CU_Boulder	4		Purdue	2		Institute_of_Biological_Physics_Pushchino	2		University_of_Glasgow	3		Massachusetts_College_of_Pharmacy_and_Health_Sciences	2		Memorial_University_of_Newfoundland	2		Nagoya_University	2		Medical_Research_Council_United_Kingdom	1
Freie_University_of_Berlin	1		UC_Davis	3		SUNY_Stony_Brook	2		University_of_Heidelberg	3		Virginia_Commonwealth	4		Drexel	3		Medical_College_of_Virginia_Richmond	2		University_of_Missouri	2		University_of_Illinois_Chicago	3		CU_Denver	4		Queen's_University_Kingston	2		Kansas_State	2		University_of_Illinois_Urbana-Champaign	3		Northwestern	2		Michigan_State	2		Ohio_University	2		Northwestern	1
Indiana_University_of_Pennsylvania	1		UConn	3		SUNY_Upstate_Medical	2		University_of_London	3		Chinese_Academy_of_Sciences	3		Karolinska_Institute	3		Queen's_University_Kingston	2		University_of_Parma	2		University_of_Maryland_College_Park	3		Georgetown	4		State_University_of_New_York_System	2		London_School_Of_Hygiene_and_Tropical_Medicine	2		University_of_Leeds	3		Scripps_Research_(California)	2		National_University_of_Cordoba	2		Oregon_State	2		Purdue	1
Institute_Of_Biochemistry_And_Biophysics_Polish_Academy_Of_Sciences	1		UMass_Medical_School	3		The_Weizmann_Institute_of_Science	2		University_of_Maryland_Baltimore	3		Chinese_University_of_Hong_Kong	3		King's_College_London	3		Rice	2		University_of_Pittsburgh	2		University_of_Miami	3		Medical_College_of_Wisconsin	4		SUNY_Stony_Brook	2		Lund_University	2		University_of_London	3		Texas_A&M	2		National_University_of_Ireland	2		Rush	2		Rensselaer_Polytechnic_Institute	1
Ludwig-Maximilians-Universität_München	1		University_College_London	3		Thomas_Jefferson	2		University_of_Southern_California	3		Duquesne	3		Mcgill_University	3		Rutgers_New_Brunswick	2		University_of_Rochester	2		UT_Austin	3		Ohio_State_University	4		Texas_A&M	2		Mcgill_University	2		University_of_Maryland_College_Park	3		Tulane	2		Northwestern	2		San_Diego_State	2		Rice	1
Lund_University	1		University_of_Alabama_at_Birmingham	3		Tsinghua_University	2		Australian_National_University	2		George_Washington	3		Michigan_State	3		Texas_A&M	2		University_of_South_Carolina	2		Albert_Einstein_College_of_Medicine	2		UConn	4		Tufts	2		Morehouse_School_of_Medicine	2		University_of_Southern_California	3		UC_Santa_Barbara	2		Novosibirsk_Institute_of_Bioorganic	2		Stellenbosch_University	2		Saint_Louis_University	1
Medical_College_of_Wisconsin	1		University_of_London	3		Tulane	2		Brandeis	2		Indian_Institute_of_Science	3		Oklahoma_State	3		UC_Irvine	2		University_of_Tennessee_Health_Science_Center	2		Arizona_State	2		UNC_Greensboro	4		UC_Riverside	2		National_Institute_of_Immunology	2		University_of_Utah	3		UMass_Amherst	2		NYU	2		Technion_Israel_Institute_of_Technology	2		St_Bartholomew's_Hospital	1
Medical_University_of_Vienna	1		University_of_Medicine_and_Dentistry_of_New_Jersey	3		UMass_Amherst	2		City_University_of_New_York_The	2		LSU	3		Rice	3		UC_Santa_Barbara	2		University_of_Utah	2		City_University_of_New_York_The	2		University_of_Alabama_at_Birmingham	4		UMass_Amherst	2		Oregon_Health_&_Science	2		University_of_Wales	3		University_at_Buffalo_(SUNY)	2		Ohio_State_University	2		Tulane	2		SUNY_College_of_Environmental_Science_and_Forestry	1
Michigan_State	1		University_of_Miami	3		UMass_Boston	2		CU_Boulder	2		Medical_College_of_Ohio	3		SUNY_Binghamton	3		University_College_London	2		University_of_Zurich	2		Creighton	2		University_of_Arkansas_for_Medical_Sciences	4		University_of_Cincinnati	2		Petrov_Cancer_Research_Institutes_Petersburg	2		UT_Southwestern_Medical_Center_at_Dallas	3		University_of_Alabama_at_Birmingham	2		Penn_State	2		UC_Irvine	2		Syracuse	1
New_York_Medical_College	1		Vanderbilt	3		UMass_Medical_School	2		DePaul	2		Medical_College_of_Wisconsin	3		SUNY_Stony_Brook	3		University_of_Cambridge	2		UT_Medical_Branch	2		Georgetown	2		University_of_Bristol	4		University_of_Illinois_Urbana-Champaign	2		Princeton	2		Academy_of_Sciences_Poland	2		University_of_Buenos_Aires	2		Purdue	2		University_of_Barcelona	2		UC_Merced	1
Northwestern	1		Virginia_Commonwealth	3		University_of_Arizona	2		Florida_State	2		Northeast_Ohio_Medical_University	3		University_College_London	3		University_of_Illinois_Chicago	2		Van_andel_Research_Institute	2		Hebrew_University_of_Jerusalem	2		University_of_Cambridge	4		University_of_Maryland_Baltimore	2		Rice	2		Autonomous_University_of_Barcelona	2		University_of_Glasgow	2		Rockefeller_University	2		University_of_Illinois_Chicago	2		UC_Santa_Cruz	1
Oregon_Health_&_Science	1		Autonomous_University_of_Barcelona	2		University_of_Delaware	2		Georgia_Tech	2		Ohio_University	3		University_of_Arizona	3		University_of_London	2		Weill_Cornell_Medicine	2		Indiana_University_Bloomington	2		University_of_Miami	4		University_of_Medicine_and_Dentistry_of_New_Jersey	2		Shinshu_University	2		Boston_College	2		University_of_Gottingen	2		San_Diego_State	2		University_of_Iowa	2		University_at_Buffalo_(SUNY)	1
Osmania_University	1		Bocconi_University	2		University_of_Heidelberg	2		Graduate_School_and_University_Center_(CUNY)	2		Peking_University	3		University_of_Cape_Town	3		University_of_Nebraska-Lincoln	2		West_Virginia	2		IUPUI	2		University_of_Nebraska-Lincoln	4		University_of_Minnesota_Twin_Cities	2		State_University_of_New_York_System	2		Boston_University	2		University_of_Hawaii	2		SUNY_Stony_Brook	2		University_of_Kansas	2		University_of_Alberta	1
Portland_State	1		Boston_College	2		University_of_Iowa	2		Hebrew_University_of_Jerusalem	2		Philadelphia_College_of_Osteopathic_Medicine	3		University_of_Dundee	3		University_of_New_Mexico	2		Carnegie_Mellon	1		Mcgill_University	2		University_of_Southern_California	4		University_of_Nevada_Reno	2		SUNY_Stony_Brook	2		Brandeis	2		University_of_Iowa	2		UMass_Amherst	2		University_of_Louisville	2		University_of_Amsterdam	1
Rockefeller_University	1		Chinese_Academy_of_Sciences	2		University_of_Manchester	2		Imperial_College_London	2		Purdue	3		University_of_Edinburgh	3		University_of_Saskatchewan	2		Catholic_University_of_Leuven	1		Mcmaster_University	2		University_of_Utah	4		University_of_North_Dakota	2		Technical_University_of_Munich	2		Case_Western_Reserve	2		University_of_Kentucky	2		University_of_Basel	2		University_of_Manchester	2		University_of_Bayreuth	1
Rush_Medical_College	1		Colorado_State	2		University_of_Porto	2		Kent_State	2		Rutgers_New_Brunswick	3		University_of_Missouri	3		University_of_Southern_California	2		Cold_Spring_Harbor	1		Mount_Sinai_School_of_Medicine	2		UT_Dallas	4		University_of_Sao_Paulo	2		Texas_A&M	2		Cold_Spring_Harbor	2		University_of_Maryland_Baltimore_County	2		University_of_British_Columbia	2		University_of_New_South_Wales	2		University_of_Bristol	1
Scripps_Research_(California)	1		Emory	2		University_of_Queensland	2		Loyola_University_Chicago	2		SUNY_Binghamton	3		University_of_Sheffield	3		University_of_Tennessee	2		Federal_University_of_Santa_Catarina	1		Tehran_University_of_Medical_Sciences	2		UT_Medical_Branch	4		University_of_South_Carolina	2		Thessaloniki_Medical_School	2		CU_Boulder	2		University_of_Maryland_College_Park	2		University_of_Florida	2		University_of_Nottingham	2		University_of_Cape_Town	1
Shandong_University	1		Humboldt_University_of_Berlin	2		University_of_South_Carolina	2		Northwestern	2		Thomas_Jefferson	3		University_of_South_Florida	3		Arizona_State	1		Georgia_Tech	1		The_Weizmann_Institute_of_Science	2		Weill_Cornell_Medicine	4		University_of_Tokyo	2		UC_San_Diego	2		ETH_Zurich	2		University_of_Tennessee	2		University_of_Houston	2		University_of_Oxford	2		University_of_Edinburgh	1
St_George's_University	1		Indiana_University_Bloomington	2		University_of_Toronto	2		Ohio_University	2		Tufts	3		University_of_Toronto	3		Australian_National_University	1		Huntsman_Cancer_Institute	1		Tulane	2		Wright_State	4		University_of_Tsukuba	2		UC_Santa_Barbara	2		Fudan_University	2		University_of_the_Pacific	2		University_of_Illinois_Chicago	2		University_of_Southern_Denmark	2		University_of_Frankfurt	1
UC_Santa_Barbara	1		IUPUI	2		University_of_Vermont	2		Oregon_Health_&_Science	2		Tulane	3		University_of_Utah	3		Baylor_College_of_Medicine	1		Icahn_School_of_Medicine	1		UC_Irvine	2		Baylor_College_of_Medicine	3		University_of_Waterloo	2		UC_Santa_Cruz	2		George_Washington	2		University_of_Vermont	2		University_of_Miami	2		University_of_Tennessee	2		University_of_Hamburg	1
Universidad_Catolica_de_Santiago_de_Guayaquil	1		Kyoto_University	2		UT_Medical_Branch	2		Pompeu_Fabra_University	2		University_of_Belgrade	3		Utrecht_University	3		Brandeis	1		Indian_Statistical_Institute_Bengaluru	1		UC_Santa_Barbara	2		Colorado_State	3		University_of_Wisconsin-Milwaukee	2		UMass_Amherst	2		Georgia_State	2		University_of_Wisconsin-Milwaukee	2		University_of_Missouri	2		University_of_Vienna	2		University_of_Houston	1
Universidad_del_Valle	1		Leiden_University	2		Academy_of_Sciences_Hungary	1		Princeton	2		University_of_Buenos_Aires	3		Vanderbilt	3		Brooklyn_College_(CUNY)	1		Indiana_University_Bloomington	1		UConn	2		Dartmouth	3		UT_Health_Science_Center_at_Houston	2		University_of_Adelaide	2		Hebrew_University_of_Jerusalem	2		UT_Austin	2		University_of_Nevada_Reno	2		UT_Austin	2		University_of_Illinois_Urbana-Champaign	1
University_of_Alberta	1		Louis_Pasteur_University	2		Aix-Marseille_University	1		Princeton_Theological_Seminary	2		University_of_Edinburgh	3		Virginia_Tech	3		Butler_University	1		Kansas_State	1		Universite_Libre_de_Bruxelles	2		East_Carolina	3		Virginia_Commonwealth	2		University_of_Alabama	2		Icahn_School_of_Medicine	2		Wake_Forest	2		University_of_Ottawa	2		Wayne_State	2		University_of_Keele	1
University_of_Amsterdam	1		Max_Planck_Institute	2		All_India_Institute_of_Medical_Sciences	1		Rush_Medical_College	2		University_of_Houston	3		Albertus_Magnus_College	2		China_Agricultural_University	1		Lomonosov_Moscow_State_University	1		University_at_Buffalo_(SUNY)	2		Gazi_Üniversitesi	3		Yeshiva	2		University_of_Delhi	2		Iowa_State	2		Wayne_State	2		University_of_Oxford	2		American	1		University_of_Liverpool	1
University_of_Basel	1		Mcmaster_University	2		Annaba_Medical_School_of_Algeria	1		Rutgers_New_Brunswick	2		University_of_Maryland_College_Park	3		Brandeis	2		Claremont_Graduate	1		Louisiana_Tech	1		University_of_Alabama_at_Birmingham	2		Hebrew_University_of_Jerusalem	3		Baylor	1		University_of_Hawaii	2		King's_College_London	2		Wellcome_Sanger_Institute	2		University_of_Rochester	2		Australian_National_University	1		University_of_Missouri_St_Louis	1
University_of_Buenos_Aires	1		Rutgers_New_Brunswick	2		Arizona_State	1		Scripps_Research_(California)	2		University_of_Medicine_and_Dentistry_of_New_Jersey	3		Carnegie_Mellon	2		Durham_University	1		Madurai_Kamaraj_University	1		University_of_British_Columbia	2		IUPUI	3		Baylor_College_of_Medicine	1		University_of_Kansas	2		Lomonosov_Moscow_State_University	2		Yeshiva	2		University_of_South_Carolina	2		Ball_State	1		University_of_Otago	1
University_of_Cincinnati	1		SUNY_Upstate_Medical	2		Augusta	1		Texas_A&M	2		University_of_Oxford	3		Chatham_University	2		East_Carolina	1		Max_Planck_Institute	1		University_of_Cincinnati	2		Louis_Pasteur_University	3		Carnegie_Mellon	1		University_of_Leicester	2		Loyola_University_Chicago	2		Academy_of_Sciences_Hungary	1		University_of_the_Witwatersrand	2		Bielefeld_University	1		University_of_Oxford	1
University_of_Cologne	1		Texas_A&M	2		Baylor_College_of_Medicine	1		Tufts	2		University_of_Palermo	3		CU_Denver	2		Florida_State	1		Ohio_State_University	1		University_of_Giessen	2		LSU_Health_Shreveport	3		Chinese_Academy_of_Medical_Sciences	1		University_of_London	2		Madurai_Kamaraj_University	2		Albany_Medical_College	1		University_of_Virginia	2		Calicut_Medical_College	1		University_of_Paris_VI_(Pierre_and_Marie_Curie)	1
University_of_Gottingen	1		Tulane	2		Caltech	1		Tulane	2		University_of_Tennessee	3		DePaul	2		Friedrich-Alexander_University_of_Erlangen-Nurnberg	1		Oregon_State	1		University_of_Kentucky	2		Rush_Medical_College	3		CU_Denver	1		University_of_Louisville	2		Medical_University_of_Lviv	2		Arizona_State	1		University_of_Zurich	2		Carnegie_Mellon	1		University_of_Rochester	1
University_of_Hawaii	1		UC_Santa_Barbara	2		Carnegie_Mellon	1		Umea_University	2		University_of_Toledo	3		Florida_State	2		Georgia_State	1		Pardee_Rand_Graduate_School	1		University_of_Madrid	2		Texas_A&M	3		East_China_University_of_Science_and_Technology	1		University_of_Maryland_College_Park	2		Nagoya_University	2		Beatson_Institute_for_Cancer_Research_Glasgow_United_Kingdom	1		UT_Health_Science_Center_at_Houston	2		Case_Western_Reserve	1		University_of_Saskatchewan	1
University_of_Kansas	1		University_College_Dublin	2		Catholic_University_of_America	1		University_at_Albany_(SUNY)	2		University_of_Waterloo	3		Georgia_Tech	2		Georgia_Tech	1		Rice	1		University_of_Nevada_Reno	2		Tongji_Medical_University	3		East_Tennessee_State	1		University_of_Miami	2		National_Tsing-Hua_University	2		Bogomoletz_Institute_of_Physiology	1		UT_Southwestern_Medical_Center_at_Dallas	2		Centro_de_Investigaciones	1		University_of_Toulouse	1
University_of_Liege	1		University_of_Arizona	2		Catholic_University_Silva_Henriquez	1		University_at_Buffalo_(SUNY)	2		University_of_Western_Ontario	3		Indian_Institute_of_Technology	2		Hokkaido_University	1		Sciences_Po	1		University_of_Oregon	2		University_at_Buffalo_(SUNY)	3		Emory	1		University_of_Montreal	2		Oregon_Health_&_Science	2		Carnegie_Mellon	1		Vanderbilt	2		Charite_University_Medicine	1		University_of_Vienna	1
University_of_Lille	1		University_of_Chile	2		Cayetano_Heredia_University	1		University_College_London	2		UT_Austin	3		Kansas_State	2		Imperial_College_London	1		Simon_Fraser_University	1		University_of_Paris_VI_(Pierre_and_Marie_Curie)	2		University_College_Dublin	3		Freie_University_of_Berlin	1		University_of_Nevada_Reno	2		Osaka_University	2		Chiba_University	1		Washington_University_St_Louis	2		Dartmouth	1		University_of_Virginia	1
University_of_Lubeck	1		University_of_Cincinnati	2		Chinese_Academy_of_Medical_Sciences	1		University_of_British_Columbia	2		UT_Southwestern_Medical_Center_at_Dallas	3		Leiden_University	2		Indian_Veterinary_Research_Institute_Izatnagar_India	1		Southern_Illinois_University_Carbondale	1		University_of_Tennessee_Health_Science_Center	2		University_of_Alberta	3		Friedrich-Alexander_University_of_Erlangen-Nurnberg	1		University_of_Nis	2		Peking_University	2		Chinese_Academy_of_Medical_Sciences	1		Wayne_State	2		Emory	1		University_of_Waterloo	1
University_of_Medicine_Craiova	1		University_of_Gottingen	2		City_University_of_New_York_The	1		University_of_Florida	2		Albany_Medical_College	2		Mayo_Clinic_Graduate_School_of_Biomedical_Sciences_The	2		Max_Planck_Institute_for_Biophysical_Chemistry	1		Texas_A&M	1		Washington_State	2		University_of_Delaware	3		Georgetown	1		University_of_Sao_Paulo	2		Ross_University	2		College_of_Saint_Scholastica	1		Weill_Cornell_Medicine	2		Florida_State	1		University_of_Western_Ontario	1
University_of_Melbourne	1		University_of_Heidelberg	2		Clarkson	1		University_of_Georgia	2		All_India_Institute_of_Medical_Sciences	2		Oregon_State	2		Mayo_Clinic_Graduate_School_of_Biomedical_Sciences_The	1		Tsinghua_University	1		Academy_of_Sciences_Russia	1		University_of_Louisville	3		Graduate_School_and_University_Center_(CUNY)	1		University_of_Southern_California	2		Texas_Woman's	2		Dartmouth	1		American_University_of_Beirut	1		George_Washington	1		UT_Southwestern_Medical_Center_at_Dallas	1
University_of_Miami	1		University_of_Iowa	2		CU_Boulder	1		University_of_Kansas	2		Arizona_State	2		Peking_Union_Medical_College	2		Mcgill_University	1		Tufts	1		Aix-Marseille_University	1		University_of_Oklahoma	3		Hebrew_University_of_Jerusalem	1		University_of_Strathclyde	2		The_Weizmann_Institute_of_Science	2		Florida_Atlantic	1		Armed_Forces_Medical_College	1		Georgetown	1		Washington_University_St_Louis	1
University_of_Murcia	1		University_of_Melbourne	2		Drexel	1		University_of_Kentucky	2		Ball_State	2		Portland_State	2		Medical_College_of_Wisconsin	1		UC_Davis	1		Baylor_College_of_Medicine	1		UT_Health_Science_Center_at_Houston	3		IUPUI	1		University_of_Waterloo	2		UC_Irvine	2		Georgetown	1		BJ_Medical_College	1		Humboldt_University_of_Berlin	1		Wayne_State	1
University_of_New_Mexico	1		University_of_New_England	2		Ege_University	1		University_of_Louisville	2		Beijing_Capital_Medical_University	2		Rhodes_University	2		National_Center_for_Biological_Sciences	1		UC_Riverside	1		Bogomoletz_Institute_of_Physiology	1		Virginia_Commonwealth	3		Kansas_State	1		UT_Austin	2		UC_Riverside	2		Hacettepe_University	1		Brandeis	1		Icahn_School_of_Medicine	1		A_T_Still_University	0
University_of_Oregon	1		University_of_Paris_Campus_Unknown	2		Federal_University_of_Goias	1		University_of_Oregon	2		Brown	2		Ruhr-Universitat_Bochum	2		National_Technical_University_Kharkiv_Polytechnic_Institute	1		UC_San_Francisco	1		Bowling_Green_State	1		Virginia_Tech	3		Keio_University	1		UT_Health_Science_Center_at_San_Antonio	2		University_of_Bombay	2		Indiana_University_Bloomington	1		Cairo_University	1		Imperial_College_London	1		Aarhus_University	0
University_of_Parma	1		University_of_Paris_V_(Paris_Descartes)	2		Free_University_Berlin	1		University_of_Paris_V_(Paris_Descartes)	2		Clark_Atlanta	2		Rush	2		National_University_of_Singapore	1		UConn	1		Brandeis	1		Academy_of_Military_Medical_Sciences	2		Kumamoto_University	1		UT_Southwestern_Medical_Center_at_Dallas	2		University_of_Lausanne	2		Institute_of_Cancer_Research_London	1		Case_Western_Reserve	1		Instituto_Leloir	1		Academia_of_Sciences_Romania	0
University_of_Saskatchewan	1		University_of_Pavia	2		Freie_University_of_Berlin	1		University_of_Science_and_Technology_of_China	2		CU_Boulder	2		Rutgers_New_Brunswick	2		North_Carolina_State	1		University_of_Braunschweig	1		Claremont_Graduate	1		Auburn	2		Kyoto_University	1		Academy_of_Sciences_Russia	1		University_of_Manitoba	2		Kyoto_University	1		Colorado_State	1		Iowa_State	1		Academia_Sinica_Taiwan	0
University_of_South_Florida	1		University_of_Portsmouth	2		Frontier_Nursing_University	1		University_of_South_Carolina	2		Dalhousie_University	2		RWTH_Aachen_University	2		North_Dakota_State	1		University_of_Buenos_Aires	1		College_de_France	1		Bilkent_University	2		Lehigh	1		Akita_University	1		University_of_Melbourne	2		Leiden_University	1		Drexel	1		Korea_Advanced_Institute_of_Science_and_Technology	1		Academy_of_Agricultural_and_Forestry_Sciences	0
University_of_Southern_California	1		University_of_Southern_California	2		Gandhi_Medical_College_Hyderabad_India	1		University_of_Tennessee	2		Dartmouth	2		Sao_Paulo_State_University	2		Oklahoma_State	1		University_of_Jyvaskyla	1		Dartmouth	1		Bowling_Green_State	2		Leiden_University	1		Albert_Einstein_College_of_Medicine	1		University_of_Toronto	2		Loma_Linda	1		Federal_University_of_Rio_Grande_do_Sul	1		Kyoto_University	1		Academy_of_Agricultural_Sciences_Sofia_Bulgaria	0
University_of_Sydney	1		University_of_Western_Ontario	2		Georgetown	1		University_of_Utah	2		Emory	2		Temple	2		Ontario_Veterinary_College	1		University_of_Leeds	1		Erasmus_University_Rotterdam	1		Chinese_Academy_of_Sciences	2		Ludwig-Maximilians-Universität_München	1		American_University_of_Beirut	1		Wayne_State	2		Ludwig-Maximilians-Universität_München	1		Finch_University_of_Health_Sciences_Chicago	1		Lund_University	1		Academy_of_Agriculture_Poland	0
University_of_Tennessee	1		University_of_Zurich	2		Georgia_Tech	1		University_of_Waterloo	2		Fourth_Military_Medical_University	2		UC_Davis	2		Oregon_State	1		University_of_Maryland_Baltimore	1		Florida_Institute_of_Technology	1		Freie_University_of_Berlin	2		Lund_University	1		Arizona_State	1		Weill_Cornell_Medicine	2		Lund_University	1		Florida_State	1		Marquette	1		Academy_of_Medical_Science_Russia	0
University_of_Texas_MD_Anderson_Cancer_Center_The	1		UT_Health_Science_Center_at_Houston	2		Government_Medical_College_Mysore_University_India	1		UT_Health_Science_Center_at_Houston	2		Fudan_University	2		UC_Irvine	2		Pardee_Rand_Graduate_School	1		University_of_Memphis	1		George_Washington	1		Icahn_School_of_Medicine	2		Mayo_Clinic_Graduate_School_of_Biomedical_Sciences_The	1		Auburn	1		Albert_Einstein_College_of_Medicine	1		Mayo_Clinic_Graduate_School_of_Biomedical_Sciences_The	1		George_Washington	1		Mcgill_University	1		Academy_of_Medical_Sciences_Russia	0
University_of_Toronto	1		Wayne_State	2		Hacettepe_University	1		Weill_Cornell_Medicine	2		Georgia_State	2		UC_Santa_Cruz	2		Rensselaer_Polytechnic_Institute	1		University_of_Notre_Dame	1		Hahnemann_Medical_College_Philadelphia	1		Institute_Of_Biochemistry_And_Biophysics_Polish_Academy_Of_Sciences	2		Medical_University_of_South_Carolina	1		Autonomous_University_of_Madrid	1		All-Union_Cancer_Research_Center	1		Mcgill_University	1		Georgia_Tech	1		Medical_University_of_Vienna	1		Academy_of_Medical_Sciences_United_Kingdom	0
University_of_Virginia	1		Yeshiva	2		Haryana_Agricultural_University	1		Albany_College_of_Pharmacy_and_Health_Sciences	1		Huazhong_University_of_Science_and_Technology	2		UMass_Medical_School	2		Rush	1		University_of_Reading	1		Illinois_Tech	1		Kanazawa_University	2		Michigan_State	1		Beijing_Medical_University	1		Allegheny_University_of_the_Health_Sciences	1		Medical_College_of_Pennsylvania	1		Howard	1		Meharry_Medical_College	1		Academy_of_Medicine_Bialystok	0
University_of_Wales	1		Aarhus_University	1		Imperial_College_London	1		Aston_University	1		Humboldt_University_of_Berlin	2		University_of_Alabama	2		Scripps_Research_(California)	1		University_of_Vermont	1		Institute_of_Child_Psychology_at_the_University_of_Minnesota	1		Kansas_State	2		Michigan_Technological	1		BJ_Medical_College	1		Aristotle_University_of_Thessaloniki	1		Medical_University_of_South_Carolina	1		Imperial_College_London	1		National_Taiwan_University	1		Academy_of_Medicine_Poland	0
University_of_Waterloo	1		All_India_Institute_of_Medical_Sciences	1		Indian_Institute_of_Science	1		Augusta	1		Madurai_Kamaraj_University	2		University_of_Alberta	2		Simon_Fraser_University	1		University_of_Wisconsin-Milwaukee	1		Institute_of_Genetics_and_Selection_of_Industrial_Microorganisms	1		Kent_State	2		National_Institute_for_Medical_Research_London	1		Boston_College	1		Arizona_State	1		Michigan_State	1		Kabul_Medical_University	1		New_Mexico_State	1		Academy_of_Military_Medical_Sciences	0
University_of_Western_Ontario	1		American	1		Indiana_University_Bloomington	1		Autonomous_University_of_Madrid	1		Mayo_Clinic_Graduate_School_of_Biomedical_Sciences_The	2		University_of_Birmingham	2		State_University_of_New_York_System	1		UT_Southwestern_Medical_Center_at_Dallas	1		Iowa_State	1		Kyoto_University	2		National_University_of_Ireland	1		Brunel_University	1		Brown	1		Mount_Sinai_School_of_Medicine	1		Kasturba_Medical_College_Manipal_University	1		New_Mexico_Tech	1		Academy_of_Science_Berlin	0
University_of_Wisconsin-Madison	1		Augusta	1		Institute_of_Medical_Sciences_Varanasi	1		Ball_State	1		Mcmaster_University	2		University_of_Buenos_Aires	2		Syracuse	1		Vanderbilt	1		Istanbul_University	1		Madurai_Kamaraj_University	2		National_University_of_La_Plata	1		Catholic_University_of_America	1		Carnegie_Mellon	1		New_York_Medical_College	1		Loma_Linda	1		New_York_Medical_College	1		Academy_of_Science_Minsk	0
UT_Health_Science_Center_at_San_Antonio	1		Ball_State	1		King's_College_London	1		Bangalore_Medical_College	1		Medical_University_of_South_Carolina	2		University_of_Cambridge	2		Temple	1		A_T_Still_University	0		Jawaharlal_Nehru_University	1		Mcmaster_University	2		Newcastle_University	1		Chiang_Mai_University	1		Catholic_University_of_America	1		Oregon_Health_&_Science	1		Louis_Pasteur_University	1		Pardee_Rand_Graduate_School	1		Academy_of_Sciences_Budapest	0
Utrecht_University	1		Cairo_University	1		Kishinev_State_Medical_Institute	1		Caltech	1		New_York_Medical_College	2		University_of_Chile	2		Texas_Woman's	1		Aarhus_University	0		Karolinska_Institute	1		Medical_University_of_South_Carolina	2		Peking_Union_Medical_College	1		Chiba_University	1		Chinese_Academy_of_Sciences	1		Osaka_University	1		Loyola_University_Chicago	1		Pontifical_Catholic_University_Of_Chile	1		Academy_of_Sciences_Hungary	0
West_Virginia	1		Carnegie_Mellon	1		Lady_Hardinge_Medical_College	1		China_Pharmaceutical_University_Nanjing	1		North_Carolina_State	2		University_of_Crete	2		Tulane	1		Academia_of_Sciences_Romania	0		Lomonosov_Moscow_State_University	1		Nankai_University	2		Saint_Louis_University	1		Chicago_College_of_Osteopathic_Medicine	1		City_University_of_New_York_The	1		Pardee_Rand_Graduate_School	1		Ludwig-Maximilians-Universität_München	1		Rutgers_New_Brunswick	1		Academy_of_Sciences_of_Ukraine	0
Yokohama_City_University	1		Carol_Davila_University_of_Medicine	1		Loma_Linda	1		Chinese_Academy_of_Sciences	1		Oregon_Health_&_Science	2		University_of_Florida	2		UC_Santa_Cruz	1		Academia_Sinica_Taiwan	0		Loyola_University_Chicago	1		National_Academy_of_Sciences_of_Belarus	2		San_Diego_State	1		Christian_Medical_College	1		Claude-Bernard_University	1		Penn_State	1		Maharishi_University_of_Management	1		Rutgers_Newark	1		Academy_of_Sciences_Poland	0
A_T_Still_University	0		Charing_Cross_and_Westminster_Medical_Schools	1		Lomonosov_Moscow_State_University	1		Cold_Spring_Harbor	1		Philadelphia_College_of_Pharmacy_and_Science	2		University_of_Glasgow	2		UConn	1		Academy_of_Agricultural_and_Forestry_Sciences	0		LSU	1		Newcastle_University	2		Shanghai_Institute_of_Biochemistry	1		City_University_of_New_York_The	1		Dartmouth	1		Pennsylvania_State_University-College_of_Medicine	1		Mayo_Clinic_Graduate_School_of_Biomedical_Sciences_The	1		SUNY_Binghamton	1		Academy_of_Sciences_Prague	0
Aarhus_University	0		Charles_University_in_Prague	1		London_School_of_Economics_and_Political_Science	1		Dayanand_Medical_College	1		Rensselaer_Polytechnic_Institute	2		University_of_Gothenburg	2		University_of_Alabama	1		Academy_of_Agricultural_Sciences_Sofia_Bulgaria	0		Mayo_Clinic_Graduate_School_of_Biomedical_Sciences_The	1		Oregon_Health_&_Science	2		Southern_Methodist	1		CU_Denver	1		Duquesne	1		Rice	1		Mcmaster_University	1		SUNY_Downstate_Health_Sciences	1		Academy_of_Sciences_Russia	0
Academia_of_Sciences_Romania	0		Cracow_University	1		LSU	1		Durham_University	1		Research_Institute_of_Molecular_Pathology_Vienna	2		University_of_Guelph	2		University_of_Auckland	1		Academy_of_Agriculture_Poland	0		Medical_College_of_Pennsylvania	1		Rockefeller_Institute	2		SUNY_College_of_Environmental_Science_and_Forestry	1		Dalhousie_University	1		Fuller_Theological_Seminary	1		Rocky_Mountain_University_of_Health_Professions	1		Medical_College_of_Wisconsin	1		SUNY_Upstate_Medical	1		Academy_Of_Sciences_Slovakia	0
Academia_Sinica_Taiwan	0		CU_Denver	1		Ludwig-Maximilians-Universität_München	1		Fatima_Jinnah_Medical_College	1		Rosalind_Franklin	2		University_of_Kansas	2		University_of_Bristol	1		Academy_of_Medical_Science_Russia	0		Medical_College_of_Wisconsin	1		Rockefeller_University	2		Syracuse	1		Damascus_University	1		Gujarat_University	1		Royal_Postgraduate_Medical_School	1		Medical_University_of_South_Carolina	1		Syracuse	1		Academy_of_Sciences_Ukraine	0
Academy_of_Agricultural_and_Forestry_Sciences	0		Curie_Institute_Paris	1		Marmara_University	1		Florida_Institute_of_Technology	1		Rush_Medical_College	2		University_of_Kentucky	2		University_of_Denver	1		Academy_of_Medical_Sciences_Russia	0		Miyazaki_Medical_College	1		State_University_of_Campinas	2		Technical_University_of_Denmark	1		Erasmus_University_Rotterdam	1		Hahnemann_University_Hospital	1		Rutgers_New_Brunswick	1		Memphis_State_University	1		The_Weizmann_Institute_of_Science	1		Adam_Mickiewicz_University	0
Academy_of_Agricultural_Sciences_Sofia_Bulgaria	0		Durham_University	1		Mayo_Clinic_Graduate_School_of_Biomedical_Sciences_The	1		Freie_University_of_Berlin	1		Tohoku_University	2		University_of_Koblenz-Landau	2		University_of_Glasgow	1		Academy_of_Medical_Sciences_United_Kingdom	0		National_Institute_for_Medical_Research_London	1		SUNY_Binghamton	2		Temple	1		Erciyes_University	1		Harokopio_University	1		Sapienza_Università_di_Roma	1		Midwestern_University-Glendale	1		Tokyo_Medical_and_Dental_University	1		Addis_Ababa_University	0
Academy_of_Agriculture_Poland	0		East_Carolina	1		Medical_University_of_Sofia	1		Georgetown	1		UC_Irvine	2		University_of_Konstanz	2		University_of_Guelph	1		Academy_of_Medicine_Bialystok	0		Newcastle_University	1		Technical_University_Berlin	2		Texas_Woman's	1		Fudan_University	1		Heinrich-Heine_University	1		Seth_GS_Medical_College	1		Nankai_University	1		UC_Riverside	1		Aga_Khan_University	0
Academy_of_Medical_Science_Russia	0		Erasmus_University_Rotterdam	1		Nanjing_University	1		Georgia_State	1		UC_Riverside	2		University_of_London	2		University_of_Kansas	1		Academy_of_Medicine_Poland	0		North_Carolina_State	1		Tohoku_University	2		Tokyo_Institute_of_Technology	1		George_Washington	1		Indian_Institute_of_Technology	1		State_University_of_New_York_System	1		National_Autonomous_University_of_Mexico	1		UMass_Amherst	1		Agence_Nationale_de_Securite	0
Academy_of_Medical_Sciences_Russia	0		ETH_Zurich	1		National_University_of_Health_Sciences	1		Icahn_School_of_Medicine	1		UMass_Boston	2		University_of_Louvain	2		University_of_Kentucky	1		Academy_of_Military_Medical_Sciences	0		Oklahoma_State	1		UC_Santa_Barbara	2		UC_Santa_Barbara	1		Hebrew_University_of_Jerusalem	1		Indiana_University_Bloomington	1		SUNY_Stony_Brook	1		Pacific_Graduate_School_of_Psychology	1		UMass_Lowell	1		Agra_University	0
Academy_of_Medical_Sciences_United_Kingdom	0		Federal_University_of_Sao_Paulo	1		New_York_Institute_of_Technology	1		Illinois_Tech	1		UMass_Medical_School	2		University_of_Manitoba	2		University_of_Maryland_Baltimore	1		Academy_of_Science_Berlin	0		Old_Dominion	1		Universidad_De_Almera	2		UC_Santa_Cruz	1		Heriot-Watt_University	1		International_School_For_Advanced_Studies	1		Tel_Aviv_University	1		Pardee_Rand_Graduate_School	1		Umea_University	1		Agrophysical_Research_Institute	0
Academy_of_Medicine_Bialystok	0		Free_University_Berlin	1		Northwestern	1		Institute_of_Biological_Physics_Pushchino	1		Universite_Laval	2		University_of_Maryland_Baltimore_County	2		University_of_Maryland_College_Park	1		Academy_of_Science_Minsk	0		Oregon_State	1		University_at_Albany_(SUNY)	2		UMass_Medical_School	1		Huazhong_University_of_Science_and_Technology	1		IP_Pavlov_Leningrad_Medical_University	1		Texas_Woman's	1		Paul_Sabatier_University	1		Universitat_Wuerzburg	1		Ahmadu_Bello_University	0
Academy_of_Medicine_Poland	0		George_Washington	1		Oakland_University	1		Institute_of_Child_Psychology_at_the_University_of_Minnesota	1		University_of_Amsterdam	2		University_of_Maryland_Medical_Center	2		University_of_Memphis	1		Academy_of_Sciences_Budapest	0		Peking_Union_Medical_College	1		University_of_British_Columbia	2		University_of_Alabama_at_Birmingham	1		Imperial_College_London	1		IUPUI	1		Tongji_University	1		Ponce_Health_Sciences_University	1		University_at_Albany_(SUNY)	1		Ain_Shams_University	0
Academy_of_Military_Medical_Sciences	0		Helsinki_University_of_Technology	1		Pandit_Bhagwat_Dayal_Sharma_Post_Graduate_Institute_of_Medical_Sciences	1		Institute_of_Mother_and_Child_Warsaw	1		University_of_Basel	2		University_of_Miami	2		University_of_Miami	1		Academy_of_Sciences_Hungary	0		Philadelphia_College_of_Pharmacy_and_Science	1		University_of_Buenos_Aires	2		University_of_Auckland	1		Iowa_State	1		Jadavpur_University	1		Tufts	1		Queen's_University_Kingston	1		University_of_Amsterdam	1		Aix-Marseille_University	0
Academy_of_Science_Berlin	0		Hofstra	1		Peking_University	1		IUPUI	1		University_of_Cape_Town	2		University_of_Nebraska-Lincoln	2		University_of_Montreal	1		Academy_of_Sciences_of_Ukraine	0		Rice	1		University_of_Cincinnati	2		University_of_Basel	1		Jadavpur_University	1		Johannes_Gutenberg_University_of_Mainz	1		UC_Irvine	1		Rosalind_Franklin	1		University_of_Basel	1		Ajou_University	0
Academy_of_Science_Minsk	0		Howard	1		Penn_State	1		Johannes_Gutenberg_University_of_Mainz	1		University_of_Cincinnati	2		University_of_Newcastle	2		University_of_Nebraska_Medical_Center	1		Academy_of_Sciences_Poland	0		Saint_Petersburg_State_Pediatric_Medical_University	1		University_of_Memphis	2		University_of_Cambridge	1		Jawaharlal_Nehru_Center_for_Advanced_Scientific_Research	1		Kagoshima_University	1		UConn	1		Ross_University	1		University_of_Birmingham	1		Akita_University	0
Academy_of_Sciences_Budapest	0		Imperial_Cancer_Research_Fund	1		Queen's_University_Kingston	1		Korea_Advanced_Institute_of_Science_and_Technology	1		University_of_Geneva	2		University_of_Nottingham	2		University_of_Notre_Dame	1		Academy_of_Sciences_Prague	0		Sapienza_Università_di_Roma	1		University_of_Milan	2		University_of_Canterbury	1		Karolinska_Institute	1		Karolinska_Institute	1		UMass_Medical_School	1		Rutgers_Newark	1		University_of_Buenos_Aires	1		Alabama_A&M	0
Academy_of_Sciences_Hungary	0		Imperial_College_London	1		Rutgers_Newark	1		London_School_of_Economics_and_Political_Science	1		University_of_Georgia	2		University_of_Oxford	2		University_of_Pittsburgh	1		Academy_of_Sciences_Russia	0		Seattle_University	1		University_of_Mississippi	2		University_of_Dundee	1		La_Salle_University	1		Kent_State	1		UNC_Greensboro	1		Saint_George's_Medical_School	1		University_of_Canterbury	1		Alabama_State	0
Academy_of_Sciences_of_Ukraine	0		Indian_Institute_of_Technology	1		Saint_Louis_University	1		London_School_Of_Hygiene_and_Tropical_Medicine	1		University_of_Hannover	2		University_of_Paris_Campus_Unknown	2		University_of_Sao_Paulo	1		Academy_Of_Sciences_Slovakia	0		Semmelweis_University	1		University_of_Missouri	2		University_of_Geneva	1		Lake_Erie_College_of_Osteopathic_Medicine	1		Kyoto_University	1		University_of_Alabama	1		Saint_Louis_University	1		University_of_Cologne	1		Albany_College_of_Pharmacy_and_Health_Sciences	0
Academy_of_Sciences_Poland	0		King_George's_Medical_College	1		Southern_Connecticut_State_University	1		Ludwig-Maximilians-Universität_München	1		University_of_Hawaii	2		University_of_Pavia	2		University_of_South_Carolina	1		Academy_of_Sciences_Ukraine	0		Soochow_University	1		University_of_Notre_Dame	2		University_of_Hawaii	1		Lehigh	1		Leiden_University	1		University_of_Belgrade	1		Sapienza_Università_di_Roma	1		University_of_Delhi	1		Albany_Medical_College	0
Academy_of_Sciences_Prague	0		Lady_Hardinge_Medical_College	1		State_University_of_New_York_System	1		Macquarie_University	1		University_of_Innsbruck_in_Austria	2		University_of_Philippines	2		University_of_St_Thomas_MN	1		Adam_Mickiewicz_University	0		Southern_Illinois_University_Carbondale	1		University_of_Oxford	2		University_of_Idaho	1		Loma_Linda	1		Long_Island_University_Brooklyn	1		University_of_Edinburgh	1		Shiraz_University_of_Medical_Sciences	1		University_of_Edinburgh	1		Albert_Einstein_College_of_Medicine	0
Academy_of_Sciences_Russia	0		Lehigh	1		SUNY_College_of_Environmental_Science_and_Forestry	1		Max_Planck_Institute	1		University_of_Kentucky	2		University_of_Queensland	2		University_of_Tokyo	1		Addis_Ababa_University	0		SUNY_Downstate_Health_Sciences	1		University_of_Pavia	2		University_of_Illinois_Chicago	1		Loyola_University_Chicago	1		LSU	1		University_of_Florence	1		Technische_UniversitSt_Darmstadt	1		University_of_Geneva	1		Albert_Szent-Gyorgyi_Medical_University	0
Academy_Of_Sciences_Slovakia	0		Lomonosov_Moscow_State_University	1		Syracuse	1		Medical_College_of_Wisconsin	1		University_of_London	2		University_of_Sao_Paulo	2		University_of_Vermont	1		Aga_Khan_University	0		SUNY_Stony_Brook	1		University_of_Quebec	2		University_of_Italy	1		Marche_Polytechnic_University	1		Marmara_University	1		University_of_Hannover	1		Tehran_University_of_Medical_Sciences	1		University_of_Gothenburg	1		Albertus_Magnus_College	0
Academy_of_Sciences_Ukraine	0		London_School_Of_Hygiene_and_Tropical_Medicine	1		Texas_A&M	1		Nanyang_Technological_University	1		University_of_Mumbai	2		University_of_Southampton	2		University_of_Virginia	1		Agence_Nationale_de_Securite	0		SUNY_Upstate_Medical	1		University_of_Sao_Paulo	2		University_of_Kansas	1		Max_Planck_Institute_for_Biophysical_Chemistry	1		Massey_University	1		University_of_Heidelberg	1		Tel_Aviv_University	1		University_of_Gottingen	1		Alexandria_University	0
Adam_Mickiewicz_University	0		Loyola_University_Chicago	1		Tufts	1		New_Mexico_State	1		University_of_Navarra	2		University_of_Western_Australia	2		University_of_Wyoming	1		Agra_University	0		Syddansk_Universitet	1		University_of_Sheffield	2		University_of_Kentucky	1		Mayo_Clinic_Graduate_School_of_Biomedical_Sciences_The	1		Max_Planck_Institute_of_Neurobiology	1		University_of_Hong_Kong	1		Texas_Tech	1		University_of_Groningen	1		Alexandru_Ioan_Cuza_University	0
Addis_Ababa_University	0		Maharaja_Sayajirao_University_of_Baroda	1		UC_Davis	1		North_Carolina_State	1		University_of_Science_and_Technology_of_China	2		University_of_Wisconsin-Milwaukee	2		Utrecht_University	1		Agrophysical_Research_Institute	0		Syracuse	1		University_of_Southampton	2		University_of_Louisville	1		Medical_College_of_Virginia_Richmond	1		Mayo_Clinic_Graduate_School_of_Biomedical_Sciences_The	1		University_of_Istanbul	1		The_University_of_Windsor	1		University_of_Helsinki	1		Alfred	0
Aga_Khan_University	0		Massachusetts_College_of_Pharmacy_and_Health_Sciences	1		University_College_Dublin	1		Notre_Dame_de_Namur_University	1		University_of_Sofia	2		Wayne_State	2		Washington_State	1		Ahmadu_Bello_University	0		Technical_University	1		University_of_Sydney	2		University_of_Maryland_College_Park	1		Miami_University	1		Medical_University_of_Warsaw	1		University_of_Louisville	1		The_Weizmann_Institute_of_Science	1		University_of_Houston	1		Aligarh_Muslim_University	0
Agence_Nationale_de_Securite	0		Medical_College_of_Wisconsin	1		University_of_Barcelona	1		NYU	1		University_of_South_Carolina	2		Weill_Cornell_Medicine	2		Wayne_State	1		Ain_Shams_University	0		Texas_A&M	1		University_of_Tokyo	2		University_of_Nebraska-Lincoln	1		Moscow_Institute_of_Physics_and_Technology	1		Michigan_State	1		University_of_Maryland_Baltimore	1		Thomas_Jefferson	1		University_of_Lausanne	1		All_India_Institute_of_Medical_Sciences	0
Agra_University	0		Medical_University_of_South_Carolina	1		University_of_Basel	1		Ohio_Northern_University	1		University_of_Surrey	2		Yeshiva	2		West_Paulista_University	1		Aix-Marseille_University	0		Texas_A&M_University_Galveston	1		University_of_Wroclaw	2		University_of_North_Texas	1		National_University_of_Singapore	1		Monash_University	1		University_of_Melbourne	1		Touro_College	1		University_of_Maryland_College_Park	1		All-Union_Cancer_Research_Center	0
Agrophysical_Research_Institute	0		Montana_State	1		University_of_Belgrade	1		Oklahoma_State	1		University_of_Tokyo	2		Academy_of_Medical_Science_Russia	1		A_T_Still_University	0		Ajou_University	0		Texas_Tech_University_Health_Sciences_Center	1		University_of_Zagreb	2		University_of_Notre_Dame	1		NEOMED_Institute	1		Moscow_Institute_for_Protein_Research	1		University_of_Miami	1		Touro_University_Vallejo	1		University_of_Medicine_Craiova	1		Allegheny_University_of_the_Health_Sciences	0
Ahmadu_Bello_University	0		Moscow_Institute_of_Physics_and_Technology	1		University_of_Buenos_Aires	1		Osaka_University	1		University_of_Tubingen	2		Academy_of_Sciences_Poland	1		Aarhus_University	0		Akita_University	0		The_Open_University	1		UT_Arlington	2		University_of_Oklahoma	1		New_York_Medical_College	1		Moscow_Institute_of_Biomedical_Sciences	1		University_of_Montana	1		Triangulo_Mineiro_Federal_University_Brazil	1		University_of_Melbourne	1		Alliant_International	0
Ain_Shams_University	0		National_Institute_for_Medical_Research_London	1		University_of_Cologne	1		Qingdao_University	1		UT_Dallas	2		Academy_of_Sciences_Russia	1		Academia_of_Sciences_Romania	0		Alabama_A&M	0		Thomas_Jefferson	1		UT_Health_Science_Center_at_San_Antonio	2		University_of_Oregon	1		Newcastle_University	1		Nanjing_University	1		University_of_Nebraska_Medical_Center	1		Tulane	1		University_of_Missouri	1		American	0
Aix-Marseille_University	0		National_University_of_Singapore	1		University_of_Florence	1		Rockefeller_University	1		Utrecht_University	2		Albany_Medical_College	1		Academia_Sinica_Taiwan	0		Alabama_State	0		Tokyo_Metropolitan_University	1		UT_Southwestern_Medical_Center_at_Dallas	2		University_of_Paris_XI_(Sud/South)	1		North_Carolina_State	1		National_Cardiology_Research_Center	1		University_of_Nevada_Reno	1		UC_Santa_Barbara	1		University_of_New_Mexico	1		American_College_of_Veterinary	0
Ajou_University	0		Nencki_Institute_of_Experimental_Biology	1		University_of_Florida	1		Rosalind_Franklin	1		Aarhus_University	1		American_University_of_the_Caribbean_Miami	1		Academy_of_Agricultural_and_Forestry_Sciences	0		Albany_College_of_Pharmacy_and_Health_Sciences	0		UMass_Boston	1		Western_Michigan	2		University_of_Pune	1		Northeastern	1		National_Taiwan_University	1		University_of_New_South_Wales	1		UC_Santa_Cruz	1		University_of_Notre_Dame	1		American_College_of_Veterinary_Anesthesiologists	0
Akita_University	0		Newcastle_University	1		University_of_Ghana	1		Rush	1		Academy_of_Sciences_Ukraine	1		Baylor_College_of_Medicine	1		Academy_of_Agricultural_Sciences_Sofia_Bulgaria	0		Albany_Medical_College	0		University_in_Sweden	1		Witten/Herdecke_University	2		University_of_South_Alabama	1		Ohio_State_University	1		Norwegian_College_Of_Veterinary_Medicine	1		University_of_Nottingham	1		UConn	1		University_of_Oslo	1		American_College_of_Veterinary_Clinical_Pharmacology	0
Alabama_A&M	0		North_Carolina_State	1		University_of_Hamburg	1		Russian_Research_Center_for_Molecular_Diagnostics_and_Therapy	1		Ajou_University	1		Beijing_Medical_University	1		Academy_of_Agriculture_Poland	0		Albert_Einstein_College_of_Medicine	0		University_of_Aberdeen	1		Wuhan_University	2		University_of_Tasmania	1		Osmania_University	1		Old_Dominion	1		University_of_Oregon	1		UMass_Medical_School	1		University_of_Paris_Campus_Unknown	1		American_College_of_Veterinary_Internal_Medicine	0
Alabama_State	0		Northeastern	1		University_of_Houston	1		Saint_Petersburg_State_Technical_University	1		Alexandru_Ioan_Cuza_University	1		Brooklyn_Law_School	1		Academy_of_Medical_Science_Russia	0		Albert_Szent-Gyorgyi_Medical_University	0		University_of_Alberta	1		Academy_of_Sciences_Poland	1		University_of_Tennessee	1		Pardee_Rand_Graduate_School	1		Oxford_Brookes	1		University_of_Oslo	1		Uniformed_Services_University	1		University_of_Paris_VI_(Pierre_and_Marie_Curie)	1		American_College_of_Veterinary_Pathologists	0
Albany_College_of_Pharmacy_and_Health_Sciences	0		Nova_Southeastern	1		University_of_Hull	1		Sciences_Po	1		American_University_of_Beirut	1		Bulgarian_Academy_of_Sciences	1		Academy_of_Medical_Sciences_Russia	0		Albertus_Magnus_College	0		University_of_Barcelona	1		Academy_of_Sciences_Russia	1		University_of_Texas_Health_Science_Center_Campus_Unknown	1		Peking_Union_Medical_College	1		Pasteur_Institute	1		University_of_Ottawa	1		United_States_National_Institutes_of_Health_(NIH)	1		University_of_Paris_VIII_(Vincennes_in_Saint-Denis)	1		American_College_of_Veterinary_Surgeons	0
Albany_Medical_College	0		Oregon_Health_&_Science	1		University_of_Ibadan	1		Scripps_Institution_of_Oceanography	1		Andhra_Medical_College	1		Catholic_University_of_Leuven	1		Academy_of_Medical_Sciences_United_Kingdom	0		Alexandria_University	0		University_of_Basel	1		Academy_of_Sciences_Ukraine	1		University_of_Toronto	1		Rawalpindi_Medical_College	1		Philipps-Universitat_Marburg	1		University_of_Paris_XI_(Sud/South)	1		Universidad_Autonoma_De_Ciudad_Juarez	1		University_of_Pittsburgh	1		American_College_of_Zoological_Medicine	0
Albert_Szent-Gyorgyi_Medical_University	0		Oregon_State	1		University_of_Ioannina	1		Seattle_University	1		Anhui_Medical_University	1		Catholic_University_Silva_Henriquez	1		Academy_of_Medicine_Bialystok	0		Alexandru_Ioan_Cuza_University	0		University_of_Bern	1		Augusta	1		University_of_Utah	1		Rensselaer_Polytechnic_Institute	1		Pontificia_Universidad_Javeriana	1		University_of_Pittsburgh	1		Universidad_Central_del_Caribe	1		University_of_Saskatchewan	1		American_School_of_Professional_Psychology_Honolulu_Hawaii	0
Albertus_Magnus_College	0		Osaka_University	1		University_of_Kansas	1		Seton_Hall	1		Arkhangelsk_Medical_Institute	1		Charles_University_in_Prague	1		Academy_of_Medicine_Poland	0		Alfred	0		University_of_Bologna	1		Australian_National_University	1		UT_Dallas	1		Rush	1		Purdue	1		University_of_San_Diego	1		University_College_London	1		University_of_Sheffield	1		American_Sentinel_University_Denver_Colorado	0
Alexandria_University	0		Penn_State	1		University_of_Kentucky	1		Shiga_University_of_Medical_Science	1		Auburn	1		City_University_of_New_York_The	1		Academy_of_Military_Medical_Sciences	0		Aligarh_Muslim_University	0		University_of_Bonn	1		Bulgarian_Academy_of_Sciences	1		UT_Health_Science_Center_at_San_Antonio	1		Rutgers_New_Brunswick	1		Rensselaer_Polytechnic_Institute	1		University_of_Sao_Paulo	1		University_Hospitals_of_Cleveland	1		University_of_Sherbrooke	1		American_University_of_Antigua	0
Alexandru_Ioan_Cuza_University	0		Philipps-Universitat_Marburg	1		University_of_La_Laguna	1		Simon_Fraser_University	1		Autonomous_University_of_Madrid	1		Cleveland_State	1		Academy_of_Science_Berlin	0		All_India_Institute_of_Medical_Sciences	0		University_of_Cape_Town	1		Campbell_University	1		UT_Southwestern_Medical_Center_at_Dallas	1		Saint_Petersburg_State_University	1		Rice	1		University_of_South_Florida	1		University_of_Alabama	1		University_of_Strathclyde	1		American_University_of_Beirut	0
Alfred	0		Pirogov_Russian_National_Research_Medical_University	1		University_of_Louvain	1		Ss_Cyril_and_Methodius_University_Skopje	1		Banaras_Hindu_University	1		Dalhousie_University	1		Academy_of_Science_Minsk	0		All-Union_Cancer_Research_Center	0		University_of_Geneva	1		Carnegie_Mellon	1		Virginia_Tech	1		Scripps_Research_(California)	1		Royal_Veterinary_College	1		University_of_Tennessee_Health_Science_Center	1		University_of_Alberta	1		University_of_Tehran	1		American_University_Of_Caribbean	0
Aligarh_Muslim_University	0		Purdue	1		University_of_Maryland_Baltimore	1		State_University_of_New_York_System	1		Bar-Ilan_University	1		Ecole_Normale_Superieure	1		Academy_of_Sciences_Budapest	0		Allegheny_University_of_the_Health_Sciences	0		University_of_Glasgow	1		Catholic_University_of_America	1		Wake_Forest	1		Shanxi_Medical_University	1		Russian_Cancer_Research_Center	1		University_of_Toledo	1		University_of_Birmingham	1		University_of_the_Witwatersrand	1		American_University_of_the_Caribbean_Miami	0
All_India_Institute_of_Medical_Sciences	0		Queen's_University_Belfast	1		University_of_Maryland_College_Park	1		SUNY_Stony_Brook	1		Baylor_College_of_Medicine	1		Ecole_Polytechnique_Federale_de_Lausanne	1		Academy_of_Sciences_Hungary	0		Alliant_International	0		University_of_Gottingen	1		Centro_de_Investigaciones	1		Walden_University	1		Southern_University_and_A&M_College	1		Seoul_National_University	1		University_of_Zurich	1		University_of_Calgary	1		Uppsala_University	1		Andhra_Medical_College	0
All-Union_Cancer_Research_Center	0		Research_Institute_of_Molecular_Pathology_Vienna	1		University_of_Miami	1		Temple	1		Belorussian_State_Medical_University	1		Emory	1		Academy_of_Sciences_of_Ukraine	0		American	0		University_of_Guelph	1		China_Pharmaceutical_University_Nanjing	1		Washington_State	1		Temple	1		St_George's_University	1		Uppsala_University	1		University_of_California_System	1		Utah_State	1		Andhra_University	0
Allegheny_University_of_the_Health_Sciences	0		Saint_Petersburg_State_University	1		University_of_Milan	1		The_Weizmann_Institute_of_Science	1		Brandeis	1		Erasmus_University_Rotterdam	1		Academy_of_Sciences_Poland	0		American_College_of_Veterinary	0		University_of_Hamburg	1		Chongqing_Medical_University	1		Wayne_State	1		Texas_Christian	1		SUNY_Upstate_Medical	1		UT_Medical_Branch	1		University_of_Catania	1		Utrecht_University	1		Andrews	0
Alliant_International	0		Shahid_Beheshti_University_of_Medical_Sciences	1		University_of_Naples	1		UMass_Boston	1		Bulgarian_Academy_of_Sciences	1		Federal_University_of_Ceara	1		Academy_of_Sciences_Prague	0		American_College_of_Veterinary_Anesthesiologists	0		University_of_Hawaii	1		Claremont_Graduate	1		A_T_Still_University	0		Thomas_Jefferson	1		Taishan_Medical_College	1		Utrecht_University	1		University_of_Cincinnati	1		Virginia_Commonwealth	1		Anhui_Medical_University	0
American	0		Shandong_University	1		University_of_Nebraska_Medical_Center	1		University_College_Dublin	1		Cairo_University	1		Freie_University_of_Berlin	1		Academy_of_Sciences_Russia	0		American_College_of_Veterinary_Clinical_Pharmacology	0		University_of_Heidelberg	1		Clark	1		Aarhus_University	0		UConn	1		Thessaloniki_Medical_School	1		Vanderbilt	1		University_of_Copenhagen	1		Vrije_University	1		Anna_University_Chennai	0
American_College_of_Veterinary	0		Simon_Fraser_University	1		University_of_Oklahoma	1		University_of_Alabama	1		Caltech	1		Friedrich-Alexander_University_of_Erlangen-Nurnberg	1		Academy_Of_Sciences_Slovakia	0		American_College_of_Veterinary_Internal_Medicine	0		University_of_Helsinki	1		Clemson	1		Academia_of_Sciences_Romania	0		University_of_Aberdeen	1		UMass_Amherst	1		Virginia_Commonwealth	1		University_of_Dundee	1		Weill_Cornell_Medicine	1		Annaba_Medical_School_of_Algeria	0
American_College_of_Veterinary_Anesthesiologists	0		Ss_Cyril_and_Methodius_University_Skopje	1		University_of_Paris_XI_(Sud/South)	1		University_of_Alabama_at_Birmingham	1		Cardiff_University	1		Goethe_University_Frankfurt	1		Academy_of_Sciences_Ukraine	0		American_College_of_Veterinary_Pathologists	0		University_of_Ibadan	1		Czechoslovak_Academy_of_Sciences	1		Academia_Sinica_Taiwan	0		University_of_Basel	1		UMass_Medical_School	1		Weill_Cornell_Medicine	1		University_of_Essen	1		A_T_Still_University	0		Annamalai_University	0
American_College_of_Veterinary_Clinical_Pharmacology	0		State_University_of_New_York_System	1		University_of_Pecs_Medical_School	1		University_of_Alberta	1		Central_University_of_Venezuela	1		Hahnemann_Medical_College_Philadelphia	1		Adam_Mickiewicz_University	0		American_College_of_Veterinary_Surgeons	0		University_of_Leeds	1		Duquesne	1		Academy_of_Agricultural_and_Forestry_Sciences	0		University_of_Buenos_Aires	1		Universitá_G_d'Annunzio_Chieti-Pescara	1		A_T_Still_University	0		University_of_Gottingen	1		Aarhus_University	0		Antioch_School_of_Law	0
American_College_of_Veterinary_Internal_Medicine	0		Suffolk	1		University_of_Pittsburgh	1		University_of_Auckland	1		Charing_Cross_and_Westminster_Medical_Schools	1		Icahn_School_of_Medicine	1		Addis_Ababa_University	0		American_College_of_Zoological_Medicine	0		University_of_Liege	1		Eastern_Virginia_Medical_School	1		Academy_of_Agricultural_Sciences_Sofia_Bulgaria	0		University_of_Cincinnati	1		Universite_Laval	1		Aarhus_University	0		University_of_Kentucky	1		Academia_of_Sciences_Romania	0		Appalachian_College_of_Pharmacy	0
American_College_of_Veterinary_Pathologists	0		Syracuse	1		University_of_Rhode_Island	1		University_of_Barcelona	1		Chinese_Academy_of_Medical_Sciences	1		Institute_of_Bioorganic_Chemistry	1		Aga_Khan_University	0		American_School_of_Professional_Psychology_Honolulu_Hawaii	0		University_of_London	1		George_Washington	1		Academy_of_Agriculture_Poland	0		University_of_Cologne	1		University_at_Albany_(SUNY)	1		Academia_of_Sciences_Romania	0		University_of_Louisville	1		Academia_Sinica_Taiwan	0		Arabian_Gulf_University	0
American_College_of_Veterinary_Surgeons	0		Technion_Israel_Institute_of_Technology	1		University_of_Saint_Joseph	1		University_of_Basel	1		Clark	1		Jawaharlal_Institute_of_Post-Graduate_Medical_Education_And_Research	1		Agence_Nationale_de_Securite	0		American_Sentinel_University_Denver_Colorado	0		University_of_Louisville	1		Georgia_Tech	1		Academy_of_Medical_Science_Russia	0		University_of_Geneva	1		University_College_Dublin	1		Academia_Sinica_Taiwan	0		University_of_Manitoba	1		Academy_of_Agricultural_and_Forestry_Sciences	0		ARC_Poultry_Research_Center	0
American_College_of_Zoological_Medicine	0		Tel_Aviv_University	1		University_of_South_Florida	1		University_of_Bayreuth	1		Claude-Bernard_University	1		Jikeii_University_of_Medicine	1		Agra_University	0		American_University_of_Antigua	0		University_of_Madras	1		Huazhong_University_of_Science_and_Technology	1		Academy_of_Medical_Sciences_Russia	0		University_of_Illinois_Chicago	1		University_of_Adelaide	1		Academy_of_Agricultural_and_Forestry_Sciences	0		University_of_Maryland_Baltimore	1		Academy_of_Agricultural_Sciences_Sofia_Bulgaria	0		Arcadia_University	0
American_School_of_Professional_Psychology_Honolulu_Hawaii	0		The_Weizmann_Institute_of_Science	1		University_of_Texas_MD_Anderson_Cancer_Center_The	1		University_of_Belgrade	1		Cleveland_State	1		Lomonosov_Moscow_State_University	1		Agrophysical_Research_Institute	0		American_University_of_Beirut	0		University_of_Manchester	1		Hunan_Medical_University	1		Academy_of_Medical_Sciences_United_Kingdom	0		University_of_Madras	1		University_of_Alabama_at_Birmingham	1		Academy_of_Agricultural_Sciences_Sofia_Bulgaria	0		University_of_Maryland_College_Park	1		Academy_of_Agriculture_Poland	0		Argosy_University_Atlanta	0
American_Sentinel_University_Denver_Colorado	0		Tokyo_Medical_and_Dental_University	1		University_of_Tokyo	1		University_of_Birmingham	1		Creighton	1		London_School_of_Economics_and_Political_Science	1		Ahmadu_Bello_University	0		American_University_Of_Caribbean	0		University_of_Manitoba	1		Indian_Institute_of_Science	1		Academy_of_Medicine_Bialystok	0		University_of_Medical_Sciences_and_Technology	1		University_of_Alcala	1		Academy_of_Agriculture_Poland	0		University_of_Melbourne	1		Academy_of_Medical_Science_Russia	0		Argosy_University_Sarasota	0
American_University_of_Antigua	0		Trinity_College_and_Theological_Seminary	1		University_of_Wales	1		University_of_Buenos_Aires	1		CU_Denver	1		London_School_Of_Hygiene_and_Tropical_Medicine	1		Ain_Shams_University	0		American_University_of_the_Caribbean_Miami	0		University_of_Maryland_Baltimore	1		Institute_of_Biochemistry	1		Academy_of_Medicine_Poland	0		University_of_Medicine_and_Dentistry_of_New_Jersey	1		University_of_Basel	1		Academy_of_Medical_Science_Russia	0		University_of_Montreal	1		Academy_of_Medical_Sciences_Russia	0		Argosy_University_Washington_DC	0
American_University_of_Beirut	0		Universidad_National_of_Colombia	1		University_of_West_Indies	1		University_of_Hawaii	1		East_Tennessee_State	1		LSU	1		Aix-Marseille_University	0		Andhra_Medical_College	0		University_of_Maryland_Baltimore_County	1		Institute_of_Biotechnology	1		Academy_of_Military_Medical_Sciences	0		University_of_Memphis	1		University_of_Berlin	1		Academy_of_Medical_Sciences_Russia	0		University_of_Munster	1		Academy_of_Medical_Sciences_United_Kingdom	0		Argosy_University-Twin_Cities	0
American_University_Of_Caribbean	0		Universita'_Degli_Studi_Di_Genova	1		UT_Dallas	1		University_of_Konstanz	1		Ecole_Polytechnique_Federale_de_Lausanne	1		LSU_Health_New_Orleans	1		Ajou_University	0		Andhra_University	0		University_of_Milan	1		Iowa_State	1		Academy_of_Science_Berlin	0		University_of_Minnesota_Medical_School	1		University_of_Bologna	1		Academy_of_Medical_Sciences_United_Kingdom	0		University_of_Nancy	1		Academy_of_Medicine_Bialystok	0		Aristotle_University_of_Thessaloniki	0
American_University_of_the_Caribbean_Miami	0		University_at_Albany_(SUNY)	1		UT_Southwestern_Medical_Center_at_Dallas	1		University_of_Leuven	1		Edward_Via_College_of_Osteopathic_Medicine	1		Macquarie_University	1		Akita_University	0		Andrews	0		University_of_Missouri	1		Jagiellonian_University	1		Academy_of_Science_Minsk	0		University_of_Missouri_Kansas_City	1		University_of_Calgary	1		Academy_of_Medicine_Bialystok	0		University_of_New_Brunswick_Fredericton	1		Academy_of_Medicine_Poland	0		Arkansas_State	0
Andhra_Medical_College	0		University_College_Of_Medical_Sciences	1		Utrecht_University	1		University_of_Liverpool	1		Far_Eastern_Federal_University	1		Maharaja_Sayajirao_University_of_Baroda	1		Alabama_A&M	0		Anhui_Medical_University	0		University_of_Montana	1		Karolinska_Institute	1		Academy_of_Sciences_Budapest	0		University_of_Nebraska-Lincoln	1		University_of_Cantabria	1		Academy_of_Medicine_Poland	0		University_of_Nottingham	1		Academy_of_Military_Medical_Sciences	0		Arkhangelsk_Medical_Institute	0
Andhra_University	0		University_of_Alberta	1		Vanderbilt	1		University_of_Missouri	1		Federal_University_of_Juiz_de_Fora	1		Max_Delbruck_Center	1		Alabama_State	0		Anna_University_Chennai	0		University_of_North_Texas	1		Kiev_National_Medical_University	1		Academy_of_Sciences_Hungary	0		University_of_New_Mexico	1		University_of_Cincinnati	1		Academy_of_Military_Medical_Sciences	0		University_of_Oregon	1		Academy_of_Science_Berlin	0		Armed_Forces_Medical_College	0
Andrews	0		University_Of_Ankara	1		Vrije_University	1		University_of_Missouri_Kansas_City	1		Florida_State	1		Max_Planck_Institute_of_Biochemistry	1		Albany_College_of_Pharmacy_and_Health_Sciences	0		Annaba_Medical_School_of_Algeria	0		University_of_Oslo	1		Latvian_Institute_Of_Organic_Synthesis	1		Academy_of_Sciences_of_Ukraine	0		University_of_Oklahoma	1		University_of_Copenhagen	1		Academy_of_Science_Berlin	0		University_of_Otago	1		Academy_of_Science_Minsk	0		Armenian_National_Academy_of_Sciences	0
Anhui_Medical_University	0		University_of_Barcelona	1		Washington_University_St_Louis	1		University_of_Nebraska_Medical_Center	1		Freie_University_of_Berlin	1		Mcmaster_University	1		Albany_Medical_College	0		Annamalai_University	0		University_of_Puerto_Rico	1		Loyola_University_Chicago	1		Academy_of_Sciences_Poland	0		University_of_Panama	1		University_of_Edinburgh	1		Academy_of_Science_Minsk	0		University_of_Paris_XI_(Sud/South)	1		Academy_of_Sciences_Budapest	0		Arndt_University	0
Anna_University_Chennai	0		University_of_Basel	1		Weill_Cornell_Medicine	1		University_of_Nijmegen	1		Gabrichevsky_Research_Institute_of_Epidemiology_and_Microbiology	1		Medical_University_Of_Pecs	1		Albert_Einstein_College_of_Medicine	0		Antioch_School_of_Law	0		University_of_Sao_Paulo	1		Mcgill_University	1		Academy_of_Sciences_Prague	0		University_of_Pune	1		University_of_Florida	1		Academy_of_Sciences_Budapest	0		University_of_Pavia	1		Academy_of_Sciences_Hungary	0		Ashland_University	0
Annaba_Medical_School_of_Algeria	0		University_of_Bath	1		Western_University_of_Health_Sciences	1		University_of_North_Dakota	1		Gallaudet	1		Morehouse_School_of_Medicine	1		Albert_Szent-Gyorgyi_Medical_University	0		Appalachian_College_of_Pharmacy	0		University_of_South_Carolina	1		Medical_College_of_Ohio	1		Academy_of_Sciences_Russia	0		University_of_Rhode_Island	1		University_of_Gottingen	1		Academy_of_Sciences_of_Ukraine	0		University_of_Seville	1		Academy_of_Sciences_of_Ukraine	0		Aston_University	0
Annamalai_University	0		University_of_Bristol	1		Worcester_Polytechnic_Institute	1		University_Of_North_Wales	1		Georgetown	1		Moscow_State_University	1		Albertus_Magnus_College	0		Arabian_Gulf_University	0		University_of_Tehran	1		Medical_College_of_Virginia_Richmond	1		Academy_Of_Sciences_Slovakia	0		University_of_Science_and_Technology_of_China	1		University_of_Guelph	1		Academy_of_Sciences_Poland	0		University_of_South_Florida	1		Academy_of_Sciences_Poland	0		Auburn	0
Antioch_School_of_Law	0		University_of_Buenos_Aires	1		Yerevan_State_University	1		University_of_Paris_VI_(Pierre_and_Marie_Curie)	1		Georgia_Tech	1		National_Cancer_Institute_Bethesda	1		Alexandria_University	0		ARC_Poultry_Research_Center	0		University_of_Tennessee	1		Medical_University_of_Sofia	1		Academy_of_Sciences_Ukraine	0		University_of_Southampton	1		University_of_Hong_Kong	1		Academy_of_Sciences_Prague	0		University_of_the_Republic_of_Uruguay_Medical_School	1		Academy_of_Sciences_Prague	0		Augusta	0
Appalachian_College_of_Pharmacy	0		University_of_Central_Missouri	1		A_T_Still_University	0		University_of_Queensland	1		Griffith_University	1		National_Naval_Medical_Center_Bethesda	1		Alexandru_Ioan_Cuza_University	0		Arcadia_University	0		University_of_the_Mediterranean	1		Montana_State	1		Adam_Mickiewicz_University	0		University_of_Sydney	1		University_of_Iowa	1		Academy_of_Sciences_Russia	0		University_of_Tokyo	1		Academy_of_Sciences_Russia	0		Autonomous_National_University_of_Honduras	0
Arabian_Gulf_University	0		University_of_Concepcion	1		Aarhus_University	0		University_of_Regensburg	1		Grigore_T_Popa_University_of_Medicine_and_Pharmacy	1		National_Taiwan_University	1		Alfred	0		Argosy_University_Atlanta	0		University_of_Trieste	1		National_Taiwan_University	1		Addis_Ababa_University	0		University_of_Tennessee	1		University_of_Lagos	1		Academy_Of_Sciences_Slovakia	0		University_of_Vermont	1		Academy_Of_Sciences_Slovakia	0		Autonomous_University_of_Barcelona	0
ARC_Poultry_Research_Center	0		University_of_Freiburg	1		Academia_of_Sciences_Romania	0		University_of_Sao_Paulo	1		Gunma_University	1		North_Carolina_State	1		Aligarh_Muslim_University	0		Argosy_University_Sarasota	0		University_of_Wisconsin-Milwaukee	1		New_Mexico_State	1		Aga_Khan_University	0		University_of_the_Witwatersrand	1		University_of_Liege	1		Academy_of_Sciences_Ukraine	0		University_of_Vienna	1		Academy_of_Sciences_Ukraine	0		Autonomous_University_of_Madrid	0
Arcadia_University	0		University_of_Geneva	1		Academia_Sinica_Taiwan	0		University_of_Seville	1		Guru_Nanak_Dev_University	1		Northern_Illinois	1		All_India_Institute_of_Medical_Sciences	0		Argosy_University_Washington_DC	0		University_of_Wyoming	1		Oklahoma_State	1		Agence_Nationale_de_Securite	0		University_of_Tokyo	1		University_of_Liverpool	1		Adam_Mickiewicz_University	0		University_of_Western_Ontario	1		Adam_Mickiewicz_University	0		Azabu_University	0
Argosy_University_Atlanta	0		University_of_Georgia	1		Academy_of_Agricultural_and_Forestry_Sciences	0		University_of_South_Florida	1		Hahnemann_University_Hospital	1		Oregon_Health_&_Science	1		All-Union_Cancer_Research_Center	0		Argosy_University-Twin_Cities	0		University_of_Zagreb	1		Oregon_State	1		Agra_University	0		University_of_Ulster	1		University_of_Maryland_Baltimore	1		Addis_Ababa_University	0		Washington_State	1		Addis_Ababa_University	0		Azerbaijan_National_Academy_of_Sciences	0
Argosy_University_Sarasota	0		University_of_Helsinki	1		Academy_of_Agricultural_Sciences_Sofia_Bulgaria	0		University_of_Southampton	1		Harbin_Medical_University	1		Pohang_University_of_Science_and_Technology	1		Allegheny_University_of_the_Health_Sciences	0		Aristotle_University_of_Thessaloniki	0		University_of_Zurich	1		Peking_Union_Medical_College	1		Agrophysical_Research_Institute	0		University_of_Urbino	1		University_of_Medicine_and_Dentistry_of_New_Jersey	1		Aga_Khan_University	0		West_Virginia	1		Aga_Khan_University	0		Azusa_Pacific	0
Argosy_University_Washington_DC	0		University_of_Iceland_Reykjavik	1		Academy_of_Agriculture_Poland	0		University_of_the_Pacific	1		Hebei_Medical_University	1		Pompeu_Fabra_University	1		Alliant_International	0		Arkansas_State	0		UT_Health_Science_Center_at_Houston	1		Peking_University	1		Ahmadu_Bello_University	0		University_of_Utah	1		University_of_Montreal	1		Agence_Nationale_de_Securite	0		Zhejiang_Medical_University	1		Agence_Nationale_de_Securite	0		Baba_Raghav_Das_Medical_College	0
Argosy_University-Twin_Cities	0		University_of_Illinois_Urbana-Champaign	1		Academy_of_Medical_Science_Russia	0		University_of_Toledo	1		Hebrew_University_of_Jerusalem	1		Queen's_University_Kingston	1		American	0		Arkhangelsk_Medical_Institute	0		UT_Southwestern_Medical_Center_at_Dallas	1		Philipps-Universitat_Marburg	1		Ain_Shams_University	0		University_of_Virginia	1		University_of_Paris_Campus_Unknown	1		Agra_University	0		A_T_Still_University	0		Agra_University	0		Babasaheb_Bhimrao_Ambedkar_University	0
Aristotle_University_of_Thessaloniki	0		University_of_Jordan	1		Academy_of_Medical_Sciences_Russia	0		University_of_Warsaw	1		Hokkaido_University	1		Rawalpindi_Medical_College	1		American_College_of_Veterinary	0		Armed_Forces_Medical_College	0		Virginia_Tech	1		Rosalind_Franklin	1		Aix-Marseille_University	0		University_of_Wales	1		University_of_Paris_VI_(Pierre_and_Marie_Curie)	1		Agrophysical_Research_Institute	0		Aarhus_University	0		Agrophysical_Research_Institute	0		Babes-Bolyai_University	0
Arizona_State	0		University_of_Kansas	1		Academy_of_Medical_Sciences_United_Kingdom	0		University_of_Wisconsin-Milwaukee	1		Illinois_Tech	1		Saint_Louis_University	1		American_College_of_Veterinary_Anesthesiologists	0		Armenian_National_Academy_of_Sciences	0		Western_Michigan	1		Ross_University_School_of_Medicine	1		Ajou_University	0		University_of_Western_Ontario	1		University_of_Pasteur_Strasbourg	1		Ahmadu_Bello_University	0		Academia_of_Sciences_Romania	0		Ahmadu_Bello_University	0		Bach_Institute_of_Biochemistry_Moscow	0
Arkansas_State	0		University_of_Lausanne	1		Academy_of_Medicine_Bialystok	0		University_of_Wroclaw	1		Imperial_College_London	1		Shahid_Beheshti_University_of_Medical_Sciences	1		American_College_of_Veterinary_Clinical_Pharmacology	0		Arndt_University	0		A_T_Still_University	0		Rush	1		Akita_University	0		University_of_Wollongong	1		University_of_Patras	1		Ain_Shams_University	0		Academia_Sinica_Taiwan	0		Ain_Shams_University	0		Ball_State	0
Arkhangelsk_Medical_Institute	0		University_of_Leeds	1		Academy_of_Medicine_Poland	0		University_of_York	1		Indian_Institute_of_Technology	1		Shanghai_Institute_of_Biochemistry	1		American_College_of_Veterinary_Internal_Medicine	0		Ashland_University	0		Aarhus_University	0		Saga_School_of_Medicine	1		Alabama_A&M	0		UT_San_Antonio	1		University_of_Queensland	1		Aix-Marseille_University	0		Academy_of_Agricultural_and_Forestry_Sciences	0		Aix-Marseille_University	0		Banaras_Hindu_University	0
Armed_Forces_Medical_College	0		University_of_Leipzig	1		Academy_of_Military_Medical_Sciences	0		Virginia_Commonwealth	1		Institute_of_Pharmacology_Moscow_Russia	1		SUNY_Downstate_Health_Sciences	1		American_College_of_Veterinary_Pathologists	0		Aston_University	0		Academia_of_Sciences_Romania	0		Saint_Louis_University	1		Alabama_State	0		Utrecht_University	1		University_of_Rochester	1		Ajou_University	0		Academy_of_Agricultural_Sciences_Sofia_Bulgaria	0		Ajou_University	0		Bangalore_Medical_College	0
Armenian_National_Academy_of_Sciences	0		University_of_Liege	1		Academy_of_Science_Berlin	0		Wesleyan	1		Iowa_State	1		SUNY_Upstate_Medical	1		American_College_of_Veterinary_Surgeons	0		Auburn	0		Academia_Sinica_Taiwan	0		San_Diego_State	1		Albany_College_of_Pharmacy_and_Health_Sciences	0		Wake_Forest	1		University_of_Rome_Tor_Vergata	1		Akita_University	0		Academy_of_Agriculture_Poland	0		Akita_University	0		Bangalore_University	0
Arndt_University	0		University_of_Liverpool	1		Academy_of_Science_Minsk	0		West_Virginia	1		Italian_Institute_of_Technology	1		Syracuse	1		American_College_of_Zoological_Medicine	0		Augusta	0		Academy_of_Agricultural_and_Forestry_Sciences	0		Sapienza_Università_di_Roma	1		Albany_Medical_College	0		Wayne_State	1		University_of_Sao_Paulo	1		Alabama_A&M	0		Academy_of_Medical_Science_Russia	0		Alabama_A&M	0		Bangor_University	0
Ashland_University	0		University_of_Ljubljana	1		Academy_of_Sciences_Budapest	0		Wright_State	1		IUPUI	1		Technion_Israel_Institute_of_Technology	1		American_School_of_Professional_Psychology_Honolulu_Hawaii	0		Australian_National_University	0		Academy_of_Agricultural_Sciences_Sofia_Bulgaria	0		Scripps_Research_(California)	1		Albert_Einstein_College_of_Medicine	0		Wesleyan	1		University_of_Science_and_Technology_of_China	1		Alabama_State	0		Academy_of_Medical_Sciences_Russia	0		Alabama_State	0		Bar-Ilan_University	0
Aston_University	0		University_of_Louisiana_Monroe	1		Academy_of_Sciences_of_Ukraine	0		Wroclaw_University_of_Science_and_Technology	1		Karolinska_Institute	1		Texas_Tech_University_Health_Sciences_Center	1		American_Sentinel_University_Denver_Colorado	0		Autonomous_National_University_of_Honduras	0		Academy_of_Agriculture_Poland	0		Shanghai_Jiao_Tong_University	1		Albert_Szent-Gyorgyi_Medical_University	0		Widener_University	1		University_of_Southampton	1		Albany_College_of_Pharmacy_and_Health_Sciences	0		Academy_of_Medical_Sciences_United_Kingdom	0		Albany_College_of_Pharmacy_and_Health_Sciences	0		Barkatullah_University_Bhopal_India	0
Auburn	0		University_of_Louisville	1		Academy_of_Sciences_Poland	0		Xian_Medical_University	1		Kazakh_Scientific_Research_Institute_of_Catalysis_and_Electrochemistry	1		Trinity_College_Dublin	1		American_University_of_Antigua	0		Autonomous_University_of_Barcelona	0		Academy_of_Medical_Science_Russia	0		Southern_Illinois_University_Edwardsville	1		Albertus_Magnus_College	0		A_T_Still_University	0		University_of_Strathclyde	1		Albert_Szent-Gyorgyi_Medical_University	0		Academy_of_Medicine_Bialystok	0		Albany_Medical_College	0		Barry	0
Augusta	0		University_of_Messina	1		Academy_of_Sciences_Prague	0		A_T_Still_University	0		Kazan_State_Medical_University	1		Tulane	1		American_University_of_Beirut	0		Autonomous_University_of_Madrid	0		Academy_of_Medical_Sciences_Russia	0		St_Louis_College_of_Pharmacy	1		Alexandria_University	0		Aarhus_University	0		University_of_Tennessee	1		Albertus_Magnus_College	0		Academy_of_Medicine_Poland	0		Albert_Szent-Gyorgyi_Medical_University	0		Bashkir_State_University	0
Australian_National_University	0		University_of_Milan	1		Academy_of_Sciences_Russia	0		Aarhus_University	0		Kent_State	1		UMass_Amherst	1		American_University_Of_Caribbean	0		Azabu_University	0		Academy_of_Medical_Sciences_United_Kingdom	0		SUNY_Downstate_Health_Sciences	1		Alexandru_Ioan_Cuza_University	0		Academia_of_Sciences_Romania	0		University_of_Vermont	1		Alexandria_University	0		Academy_of_Military_Medical_Sciences	0		Albertus_Magnus_College	0		Baylor	0
Autonomous_National_University_of_Honduras	0		University_of_Missouri	1		Academy_Of_Sciences_Slovakia	0		Academia_of_Sciences_Romania	0		King's_College_London	1		Universita'_Degli_Studi_Di_Genova	1		American_University_of_the_Caribbean_Miami	0		Azerbaijan_National_Academy_of_Sciences	0		Academy_of_Medicine_Bialystok	0		Syracuse	1		Alfred	0		Academia_Sinica_Taiwan	0		University_of_Waterloo	1		Alexandru_Ioan_Cuza_University	0		Academy_of_Science_Berlin	0		Alexandria_University	0		Baylor_College_of_Medicine	0
Autonomous_University_of_Barcelona	0		University_of_Mumbai	1		Academy_of_Sciences_Ukraine	0		Academia_Sinica_Taiwan	0		Kirksville_College_of_Osteopathic_Medicine	1		University_of_Alabama_at_Birmingham	1		Andhra_Medical_College	0		Azusa_Pacific	0		Academy_of_Medicine_Poland	0		Technical_University_of_Munich	1		Aligarh_Muslim_University	0		Academy_of_Agricultural_and_Forestry_Sciences	0		University_of_York	1		Alfred	0		Academy_of_Science_Minsk	0		Alexandru_Ioan_Cuza_University	0		Beatson_Institute_for_Cancer_Research_Glasgow_United_Kingdom	0
Autonomous_University_of_Madrid	0		University_of_Naples	1		Adam_Mickiewicz_University	0		Academy_of_Agricultural_and_Forestry_Sciences	0		Kyushu_University	1		University_of_Arkansas	1		Andhra_University	0		Baba_Raghav_Das_Medical_College	0		Academy_of_Military_Medical_Sciences	0		Technion_Israel_Institute_of_Technology	1		All_India_Institute_of_Medical_Sciences	0		Academy_of_Agricultural_Sciences_Sofia_Bulgaria	0		University_of_Zurich	1		Aligarh_Muslim_University	0		Academy_of_Sciences_Budapest	0		Alfred	0		Beihang_University	0
Azabu_University	0		University_of_New_Mexico	1		Addis_Ababa_University	0		Academy_of_Agricultural_Sciences_Sofia_Bulgaria	0		Lake_Erie_College_of_Osteopathic_Medicine	1		University_of_Athens	1		Andrews	0		Babasaheb_Bhimrao_Ambedkar_University	0		Academy_of_Science_Berlin	0		Temple	1		All-Union_Cancer_Research_Center	0		Academy_of_Agriculture_Poland	0		UT_El_Paso	1		All_India_Institute_of_Medical_Sciences	0		Academy_of_Sciences_Hungary	0		Aligarh_Muslim_University	0		Beijing_Capital_Medical_University	0
Azerbaijan_National_Academy_of_Sciences	0		University_of_Nice	1		Aga_Khan_University	0		Academy_of_Agriculture_Poland	0		Louis_Pasteur_University	1		University_of_Cincinnati	1		Anhui_Medical_University	0		Babes-Bolyai_University	0		Academy_of_Science_Minsk	0		The_Weizmann_Institute_of_Science	1		Allegheny_University_of_the_Health_Sciences	0		Academy_of_Medical_Science_Russia	0		UT_Health_Science_Center_at_Houston	1		All-Union_Cancer_Research_Center	0		Academy_of_Sciences_of_Ukraine	0		All_India_Institute_of_Medical_Sciences	0		Beijing_Institute_for_Biotechnology	0
Azusa_Pacific	0		University_of_Notre_Dame	1		Agence_Nationale_de_Securite	0		Academy_of_Medical_Science_Russia	0		LSU_Health_New_Orleans	1		University_of_Debrecen	1		Anna_University_Chennai	0		Bach_Institute_of_Biochemistry_Moscow	0		Academy_of_Sciences_Budapest	0		Tokyo_Metropolitan_University	1		Alliant_International	0		Academy_of_Medical_Sciences_Russia	0		UT_Health_Science_Center_at_San_Antonio	1		Allegheny_University_of_the_Health_Sciences	0		Academy_of_Sciences_Poland	0		All-Union_Cancer_Research_Center	0		Beijing_Institute_of_Pharmacology	0
Baba_Raghav_Das_Medical_College	0		University_of_Oregon	1		Agra_University	0		Academy_of_Medical_Sciences_Russia	0		Ludwig-Maximilians-Universität_München	1		University_of_Houston	1		Annaba_Medical_School_of_Algeria	0		Ball_State	0		Academy_of_Sciences_Hungary	0		Transilvania_University	1		American	0		Academy_of_Medical_Sciences_United_Kingdom	0		UT_Medical_Branch	1		Alliant_International	0		Academy_of_Sciences_Prague	0		Allegheny_University_of_the_Health_Sciences	0		Beijing_Institute_of_Pharmacology_and_Toxicology	0
Babasaheb_Bhimrao_Ambedkar_University	0		University_of_Otago	1		Agrophysical_Research_Institute	0		Academy_of_Medical_Sciences_United_Kingdom	0		Madras_Medical_College	1		University_of_Kaiserslautern	1		Annamalai_University	0		Banaras_Hindu_University	0		Academy_of_Sciences_of_Ukraine	0		Trinity_College_Dublin	1		American_College_of_Veterinary	0		Academy_of_Medicine_Bialystok	0		Virginia/Maryland_Regional_College_of_Veterinary_Medicine	1		American	0		Academy_of_Sciences_Russia	0		Alliant_International	0		Beijing_Medical_University	0
Babes-Bolyai_University	0		University_of_Padua	1		Ahmadu_Bello_University	0		Academy_of_Medicine_Bialystok	0		Maulana_Azad_Medical_College	1		University_of_Lausanne	1		Antioch_School_of_Law	0		Bangalore_Medical_College	0		Academy_of_Sciences_Poland	0		Tufts	1		American_College_of_Veterinary_Anesthesiologists	0		Academy_of_Medicine_Poland	0		Washington_University_St_Louis	1		American_College_of_Veterinary	0		Academy_Of_Sciences_Slovakia	0		American_College_of_Veterinary	0		Beijing_Normal_University	0
Bach_Institute_of_Biochemistry_Moscow	0		University_of_Paris_III_(Nouvelle_Sorbonne)	1		Ain_Shams_University	0		Academy_of_Medicine_Poland	0		Medical_University_of_Lodz	1		University_of_Liverpool	1		Appalachian_College_of_Pharmacy	0		Bangalore_University	0		Academy_of_Sciences_Prague	0		University_College_London	1		American_College_of_Veterinary_Clinical_Pharmacology	0		Academy_of_Military_Medical_Sciences	0		Zhengzhou_University	1		American_College_of_Veterinary_Anesthesiologists	0		Academy_of_Sciences_Ukraine	0		American_College_of_Veterinary_Anesthesiologists	0		Bejing_Institute_of_Radiation_Medicine	0
Ball_State	0		University_of_Paris_VIII_(Vincennes_in_Saint-Denis)	1		Ajou_University	0		Academy_of_Military_Medical_Sciences	0		Midwestern_University-Glendale	1		University_of_Manchester	1		Arabian_Gulf_University	0		Bangor_University	0		Academy_Of_Sciences_Slovakia	0		University_of_Alabama	1		American_College_of_Veterinary_Internal_Medicine	0		Academy_of_Science_Berlin	0		A_T_Still_University	0		American_College_of_Veterinary_Clinical_Pharmacology	0		Adam_Mickiewicz_University	0		American_College_of_Veterinary_Clinical_Pharmacology	0		Belarusian_State_Medical_University	0
Banaras_Hindu_University	0		University_of_Reading	1		Akita_University	0		Academy_of_Science_Berlin	0		Mie_University	1		University_of_Medicine_and_Dentistry_of_New_Jersey	1		ARC_Poultry_Research_Center	0		Bar-Ilan_University	0		Academy_of_Sciences_Ukraine	0		University_of_Barcelona	1		American_College_of_Veterinary_Pathologists	0		Academy_of_Science_Minsk	0		Aarhus_University	0		American_College_of_Veterinary_Internal_Medicine	0		Addis_Ababa_University	0		American_College_of_Veterinary_Internal_Medicine	0		Belarusian_State_University	0
Bangalore_Medical_College	0		University_of_Sao_Paulo	1		Alabama_A&M	0		Academy_of_Science_Minsk	0		Minsk_Medical_Institute	1		University_of_Montreal	1		Arcadia_University	0		Barkatullah_University_Bhopal_India	0		Adam_Mickiewicz_University	0		University_of_Bombay	1		American_College_of_Veterinary_Surgeons	0		Academy_of_Sciences_Budapest	0		Academia_of_Sciences_Romania	0		American_College_of_Veterinary_Pathologists	0		Aga_Khan_University	0		American_College_of_Veterinary_Pathologists	0		Bellarmine_University	0
Bangalore_University	0		University_of_Saskatchewan	1		Alabama_State	0		Academy_of_Sciences_Budapest	0		Moldova_State_University_of_Medicine_&_Pharmacy	1		University_of_Nebraska_Medical_Center	1		Argosy_University_Atlanta	0		Barry	0		Addis_Ababa_University	0		University_of_Clermont_Auvergne	1		American_College_of_Zoological_Medicine	0		Academy_of_Sciences_Hungary	0		Academia_Sinica_Taiwan	0		American_College_of_Veterinary_Surgeons	0		Agence_Nationale_de_Securite	0		American_College_of_Veterinary_Surgeons	0		Belmont_University	0
Bangor_University	0		University_of_Sherbrooke	1		Albany_College_of_Pharmacy_and_Health_Sciences	0		Academy_of_Sciences_Hungary	0		Nagasaki_University	1		University_of_Paris_XI_(Sud/South)	1		Argosy_University_Sarasota	0		Bashkir_State_University	0		Aga_Khan_University	0		University_of_Dundee	1		American_School_of_Professional_Psychology_Honolulu_Hawaii	0		Academy_of_Sciences_of_Ukraine	0		Academy_of_Agricultural_and_Forestry_Sciences	0		American_College_of_Zoological_Medicine	0		Agra_University	0		American_College_of_Zoological_Medicine	0		Belorussian_State_Medical_University	0
Bar-Ilan_University	0		University_of_Southern_Denmark	1		Albany_Medical_College	0		Academy_of_Sciences_of_Ukraine	0		National_and_Kapodistrian_University_of_Athens	1		University_of_Pisa	1		Argosy_University_Washington_DC	0		Baylor_College_of_Medicine	0		Agence_Nationale_de_Securite	0		University_of_Hawaii	1		American_Sentinel_University_Denver_Colorado	0		Academy_of_Sciences_Poland	0		Academy_of_Agricultural_Sciences_Sofia_Bulgaria	0		American_School_of_Professional_Psychology_Honolulu_Hawaii	0		Agrophysical_Research_Institute	0		American_School_of_Professional_Psychology_Honolulu_Hawaii	0		Ben-Gurion_University_of_the_Negev	0
Barkatullah_University_Bhopal_India	0		University_of_Tennessee	1		Albert_Szent-Gyorgyi_Medical_University	0		Academy_of_Sciences_Poland	0		National_Autonomous_University_of_Mexico	1		University_of_Puerto_Rico	1		Argosy_University-Twin_Cities	0		Beatson_Institute_for_Cancer_Research_Glasgow_United_Kingdom	0		Agra_University	0		University_of_Heidelberg	1		American_University_of_Antigua	0		Academy_of_Sciences_Prague	0		Academy_of_Agriculture_Poland	0		American_Sentinel_University_Denver_Colorado	0		Ahmadu_Bello_University	0		American_Sentinel_University_Denver_Colorado	0		Benedictine	0
Barry	0		University_of_the_Witwatersrand	1		Albertus_Magnus_College	0		Academy_of_Sciences_Prague	0		National_Institute_of_Biological_Science_Beijing	1		University_of_Sussex	1		Aristotle_University_of_Thessaloniki	0		Beihang_University	0		Agrophysical_Research_Institute	0		University_of_Houston	1		American_University_of_Beirut	0		Academy_Of_Sciences_Slovakia	0		Academy_of_Medical_Science_Russia	0		American_University_of_Antigua	0		Ain_Shams_University	0		American_University_of_Antigua	0		Bengbu_Medical_College	0
Bashkir_State_University	0		University_of_Tokyo	1		Alexandria_University	0		Academy_of_Sciences_Russia	0		National_University_of_Singapore	1		University_of_Tennessee	1		Arkansas_State	0		Beijing_Capital_Medical_University	0		Ahmadu_Bello_University	0		University_of_Khartoum	1		American_University_Of_Caribbean	0		Academy_of_Sciences_Ukraine	0		Academy_of_Medical_Sciences_Russia	0		American_University_of_Beirut	0		Aix-Marseille_University	0		American_University_of_Beirut	0		Benha_University	0
Baylor	0		University_of_Utah	1		Alexandru_Ioan_Cuza_University	0		Academy_Of_Sciences_Slovakia	0		Newcastle_University	1		University_of_Tokyo	1		Arkhangelsk_Medical_Institute	0		Beijing_Institute_for_Biotechnology	0		Ain_Shams_University	0		University_of_Kiel	1		American_University_of_the_Caribbean_Miami	0		Adam_Mickiewicz_University	0		Academy_of_Medical_Sciences_United_Kingdom	0		American_University_Of_Caribbean	0		Ajou_University	0		American_University_Of_Caribbean	0		Bernard_University	0
Beatson_Institute_for_Cancer_Research_Glasgow_United_Kingdom	0		University_of_Verona	1		Alfred	0		Academy_of_Sciences_Ukraine	0		Northeastern_Ohio_Universities	1		University_of_Tubingen	1		Armed_Forces_Medical_College	0		Beijing_Institute_of_Pharmacology	0		Ajou_University	0		University_of_Leeds	1		Andhra_Medical_College	0		Addis_Ababa_University	0		Academy_of_Medicine_Bialystok	0		American_University_of_the_Caribbean_Miami	0		Akita_University	0		American_University_of_the_Caribbean_Miami	0		Bharathidasan_University	0
Beihang_University	0		University_of_Vienna	1		Aligarh_Muslim_University	0		Adam_Mickiewicz_University	0		Nova_Southeastern	1		University_of_Tulsa	1		Armenian_National_Academy_of_Sciences	0		Beijing_Institute_of_Pharmacology_and_Toxicology	0		Akita_University	0		University_of_Leuven	1		Andhra_University	0		Aga_Khan_University	0		Academy_of_Medicine_Poland	0		Andhra_Medical_College	0		Alabama_A&M	0		Andhra_Medical_College	0		BHU_Institute_of_Technology	0
Beijing_Capital_Medical_University	0		University_of_Würzburg	1		All-Union_Cancer_Research_Center	0		Addis_Ababa_University	0		Novi_Sad_Yugoslavia	1		University_of_Turku	1		Arndt_University	0		Beijing_Medical_University	0		Alabama_A&M	0		University_of_Madras	1		Andrews	0		Agence_Nationale_de_Securite	0		Academy_of_Military_Medical_Sciences	0		Andhra_University	0		Alabama_State	0		Andhra_University	0		Bielefeld_University	0
Beijing_Institute_for_Biotechnology	0		University_of_Yamanashi	1		Allegheny_University_of_the_Health_Sciences	0		Aga_Khan_University	0		Okayama_University	1		University_of_Verona	1		Ashland_University	0		Beijing_Normal_University	0		Alabama_State	0		University_of_Malaya	1		Anhui_Medical_University	0		Agra_University	0		Academy_of_Science_Berlin	0		Andrews	0		Albany_College_of_Pharmacy_and_Health_Sciences	0		Andrews	0		Bilkent_University	0
Beijing_Institute_of_Pharmacology	0		University_of_Zagreb	1		Alliant_International	0		Agence_Nationale_de_Securite	0		Oklahoma_State	1		University_of_Vienna	1		Aston_University	0		Bejing_Institute_of_Radiation_Medicine	0		Albany_College_of_Pharmacy_and_Health_Sciences	0		University_of_Manchester	1		Anna_University_Chennai	0		Agrophysical_Research_Institute	0		Academy_of_Science_Minsk	0		Anhui_Medical_University	0		Albert_Szent-Gyorgyi_Medical_University	0		Anhui_Medical_University	0		Biola	0
Beijing_Institute_of_Pharmacology_and_Toxicology	0		Uppsala_University	1		American	0		Agra_University	0		Oregon_State	1		University_of_Western_Ontario	1		Auburn	0		Belarusian_State_Medical_University	0		Albany_Medical_College	0		University_of_Melbourne	1		Annaba_Medical_School_of_Algeria	0		Ahmadu_Bello_University	0		Academy_of_Sciences_Budapest	0		Anna_University_Chennai	0		Albertus_Magnus_College	0		Anna_University_Chennai	0		Biozentrum_Wuerzburg	0
Beijing_Medical_University	0		UT_Medical_Branch	1		American_College_of_Veterinary	0		Agrophysical_Research_Institute	0		Peking_Union_Medical_College	1		University_of_Zagreb	1		Augusta	0		Belarusian_State_University	0		Albert_Szent-Gyorgyi_Medical_University	0		University_of_Minnesota_Duluth	1		Annamalai_University	0		Ain_Shams_University	0		Academy_of_Sciences_Hungary	0		Annaba_Medical_School_of_Algeria	0		Alexandria_University	0		Annaba_Medical_School_of_Algeria	0		Birkbeck_College	0
Beijing_Normal_University	0		Wesleyan	1		American_College_of_Veterinary_Anesthesiologists	0		Ahmadu_Bello_University	0		Philadelphia_University	1		Vrije_Universiteit_Amsterdam	1		Autonomous_National_University_of_Honduras	0		Bellarmine_University	0		Albertus_Magnus_College	0		University_of_Mississippi_Medical_Center	1		Antioch_School_of_Law	0		Aix-Marseille_University	0		Academy_of_Sciences_of_Ukraine	0		Annamalai_University	0		Alexandru_Ioan_Cuza_University	0		Annamalai_University	0		Birla_Institute_of_Technology_and_Science	0
Bejing_Institute_of_Radiation_Medicine	0		A_T_Still_University	0		American_College_of_Veterinary_Clinical_Pharmacology	0		Ain_Shams_University	0		Pirogov_Russian_National_Research_Medical_University	1		Walla_Walla_University	1		Autonomous_University_of_Barcelona	0		Belmont_University	0		Alexandria_University	0		University_of_Montana	1		Appalachian_College_of_Pharmacy	0		Ajou_University	0		Academy_of_Sciences_Prague	0		Antioch_School_of_Law	0		Alfred	0		Antioch_School_of_Law	0		BJ_Medical_College	0
Belarusian_State_Medical_University	0		Academia_of_Sciences_Romania	0		American_College_of_Veterinary_Internal_Medicine	0		Aix-Marseille_University	0		Qingdao_University	1		Washington_State	1		Autonomous_University_of_Madrid	0		Belorussian_State_Medical_University	0		Alexandru_Ioan_Cuza_University	0		University_of_Montreal	1		Arabian_Gulf_University	0		Alabama_A&M	0		Academy_Of_Sciences_Slovakia	0		Appalachian_College_of_Pharmacy	0		Aligarh_Muslim_University	0		Appalachian_College_of_Pharmacy	0		Bloodcenter_of_Wisconsin_Inc	0
Belarusian_State_University	0		Academia_Sinica_Taiwan	0		American_College_of_Veterinary_Pathologists	0		Ajou_University	0		Queen's_University_Belfast	1		A_T_Still_University	0		Azabu_University	0		Ben-Gurion_University_of_the_Negev	0		Alfred	0		University_of_Nebraska_Medical_Center	1		ARC_Poultry_Research_Center	0		Alabama_State	0		Academy_of_Sciences_Ukraine	0		Arabian_Gulf_University	0		All_India_Institute_of_Medical_Sciences	0		Arabian_Gulf_University	0		Bocconi_University	0
Bellarmine_University	0		Academy_of_Agricultural_and_Forestry_Sciences	0		American_College_of_Veterinary_Surgeons	0		Akita_University	0		Queen's_University_Kingston	1		Aarhus_University	0		Azerbaijan_National_Academy_of_Sciences	0		Benedictine	0		Aligarh_Muslim_University	0		University_of_Nebraska_Omaha	1		Arcadia_University	0		Albany_College_of_Pharmacy_and_Health_Sciences	0		Adam_Mickiewicz_University	0		ARC_Poultry_Research_Center	0		All-Union_Cancer_Research_Center	0		ARC_Poultry_Research_Center	0		Bogazici_University	0
Belmont_University	0		Academy_of_Agricultural_Sciences_Sofia_Bulgaria	0		American_College_of_Zoological_Medicine	0		Alabama_A&M	0		Rockefeller_University	1		Academia_of_Sciences_Romania	0		Azusa_Pacific	0		Bengbu_Medical_College	0		All_India_Institute_of_Medical_Sciences	0		University_of_Nevada_Reno	1		Argosy_University_Atlanta	0		Albany_Medical_College	0		Addis_Ababa_University	0		Arcadia_University	0		Allegheny_University_of_the_Health_Sciences	0		Arcadia_University	0		Bogomolets_National_Medical_University	0
Belorussian_State_Medical_University	0		Academy_of_Agriculture_Poland	0		American_School_of_Professional_Psychology_Honolulu_Hawaii	0		Alabama_State	0		Rutgers_Newark	1		Academia_Sinica_Taiwan	0		Baba_Raghav_Das_Medical_College	0		Benha_University	0		All-Union_Cancer_Research_Center	0		University_of_New_Mexico	1		Argosy_University_Sarasota	0		Albert_Szent-Gyorgyi_Medical_University	0		Aga_Khan_University	0		Argosy_University_Atlanta	0		Alliant_International	0		Argosy_University_Atlanta	0		Boise_State	0
Ben-Gurion_University_of_the_Negev	0		Academy_of_Medical_Science_Russia	0		American_Sentinel_University_Denver_Colorado	0		Albany_Medical_College	0		San_Juan_Bautista_School_of_Medicine	1		Academy_of_Agricultural_and_Forestry_Sciences	0		Babasaheb_Bhimrao_Ambedkar_University	0		Bernard_University	0		Allegheny_University_of_the_Health_Sciences	0		University_of_Northern_Colorado	1		Argosy_University_Washington_DC	0		Albertus_Magnus_College	0		Agence_Nationale_de_Securite	0		Argosy_University_Sarasota	0		American	0		Argosy_University_Sarasota	0		Bolan_Medical_College	0
Benedictine	0		Academy_of_Medical_Sciences_Russia	0		American_University_of_Antigua	0		Albert_Szent-Gyorgyi_Medical_University	0		Sawai_Man_Singh_Medical_College	1		Academy_of_Agricultural_Sciences_Sofia_Bulgaria	0		Babes-Bolyai_University	0		Bharathidasan_University	0		Alliant_International	0		University_of_Otago	1		Argosy_University-Twin_Cities	0		Alexandria_University	0		Agra_University	0		Argosy_University_Washington_DC	0		American_College_of_Veterinary	0		Argosy_University_Washington_DC	0		Bose_Institute_Calcutta	0
Bengbu_Medical_College	0		Academy_of_Medical_Sciences_United_Kingdom	0		American_University_of_Beirut	0		Albertus_Magnus_College	0		Seth_GS_Medical_College	1		Academy_of_Agriculture_Poland	0		Bach_Institute_of_Biochemistry_Moscow	0		BHU_Institute_of_Technology	0		American	0		University_of_Parma	1		Aristotle_University_of_Thessaloniki	0		Alexandru_Ioan_Cuza_University	0		Agrophysical_Research_Institute	0		Argosy_University-Twin_Cities	0		American_College_of_Veterinary_Anesthesiologists	0		Argosy_University-Twin_Cities	0		Boston_College	0
Benha_University	0		Academy_of_Medicine_Bialystok	0		American_University_Of_Caribbean	0		Alexandria_University	0		Shandong_University	1		Academy_of_Medical_Sciences_Russia	0		Ball_State	0		Bielefeld_University	0		American_College_of_Veterinary	0		University_of_Pisa	1		Arizona_State	0		Alfred	0		Ahmadu_Bello_University	0		Aristotle_University_of_Thessaloniki	0		American_College_of_Veterinary_Clinical_Pharmacology	0		Aristotle_University_of_Thessaloniki	0		Bournemouth_University_United_Kingdom	0
Bernard_University	0		Academy_of_Medicine_Poland	0		American_University_of_the_Caribbean_Miami	0		Alexandru_Ioan_Cuza_University	0		Shanghai_Institute_of_Ceramics	1		Academy_of_Medical_Sciences_United_Kingdom	0		Banaras_Hindu_University	0		Bilkent_University	0		American_College_of_Veterinary_Anesthesiologists	0		University_of_Regensburg	1		Arkansas_State	0		Aligarh_Muslim_University	0		Ain_Shams_University	0		Arkansas_State	0		American_College_of_Veterinary_Internal_Medicine	0		Arkansas_State	0		Bowling_Green_State	0
Bharathidasan_University	0		Academy_of_Military_Medical_Sciences	0		Andhra_Medical_College	0		Alfred	0		Shanghai_Institute_of_Materia_Medica	1		Academy_of_Medicine_Bialystok	0		Bangalore_Medical_College	0		Biola	0		American_College_of_Veterinary_Clinical_Pharmacology	0		University_of_Rhode_Island	1		Arkhangelsk_Medical_Institute	0		All_India_Institute_of_Medical_Sciences	0		Aix-Marseille_University	0		Arkhangelsk_Medical_Institute	0		American_College_of_Veterinary_Pathologists	0		Arkhangelsk_Medical_Institute	0		Brescia_University	0
BHU_Institute_of_Technology	0		Academy_of_Science_Berlin	0		Andhra_University	0		Aligarh_Muslim_University	0		Shanghai_Medical_School	1		Academy_of_Medicine_Poland	0		Bangalore_University	0		Biozentrum_Wuerzburg	0		American_College_of_Veterinary_Internal_Medicine	0		University_of_South_Florida	1		Armed_Forces_Medical_College	0		All-Union_Cancer_Research_Center	0		Ajou_University	0		Armed_Forces_Medical_College	0		American_College_of_Veterinary_Surgeons	0		Armed_Forces_Medical_College	0		Brigham_Young	0
Bielefeld_University	0		Academy_of_Science_Minsk	0		Andrews	0		All_India_Institute_of_Medical_Sciences	0		Slippery_Rock_State_University	1		Academy_of_Military_Medical_Sciences	0		Bangor_University	0		Birkbeck_College	0		American_College_of_Veterinary_Pathologists	0		University_of_Strathclyde	1		Armenian_National_Academy_of_Sciences	0		Allegheny_University_of_the_Health_Sciences	0		Akita_University	0		Armenian_National_Academy_of_Sciences	0		American_College_of_Zoological_Medicine	0		Armenian_National_Academy_of_Sciences	0		Brock_University	0
Bilkent_University	0		Academy_of_Sciences_Budapest	0		Anhui_Medical_University	0		All-Union_Cancer_Research_Center	0		South_China_University_Of_Tropical_Agriculture	1		Academy_of_Science_Berlin	0		Bar-Ilan_University	0		Birla_Institute_of_Technology_and_Science	0		American_College_of_Veterinary_Surgeons	0		University_of_Tampere	1		Arndt_University	0		Alliant_International	0		Alabama_A&M	0		Arndt_University	0		American_School_of_Professional_Psychology_Honolulu_Hawaii	0		Arndt_University	0		Brooklyn_College_(CUNY)	0
Biola	0		Academy_of_Sciences_Hungary	0		Anna_University_Chennai	0		Allegheny_University_of_the_Health_Sciences	0		Southern_Illinois_University_Carbondale	1		Academy_of_Science_Minsk	0		Barkatullah_University_Bhopal_India	0		BJ_Medical_College	0		American_College_of_Zoological_Medicine	0		University_of_Toledo	1		Ashland_University	0		American	0		Alabama_State	0		Ashland_University	0		American_Sentinel_University_Denver_Colorado	0		Ashland_University	0		Brooklyn_Law_School	0
Biozentrum_Wuerzburg	0		Academy_of_Sciences_of_Ukraine	0		Annamalai_University	0		Alliant_International	0		St_George's_University	1		Academy_of_Sciences_Budapest	0		Barry	0		Bloodcenter_of_Wisconsin_Inc	0		American_School_of_Professional_Psychology_Honolulu_Hawaii	0		University_of_Tucuman	1		Aston_University	0		American_College_of_Veterinary	0		Albany_College_of_Pharmacy_and_Health_Sciences	0		Aston_University	0		American_University_of_Antigua	0		Aston_University	0		Brunel_University	0
Birkbeck_College	0		Academy_of_Sciences_Poland	0		Antioch_School_of_Law	0		American	0		SUNY_Upstate_Medical	1		Academy_of_Sciences_Hungary	0		Bashkir_State_University	0		Bocconi_University	0		American_Sentinel_University_Denver_Colorado	0		University_of_Vermont	1		Auburn	0		American_College_of_Veterinary_Anesthesiologists	0		Albany_Medical_College	0		Auburn	0		American_University_Of_Caribbean	0		Auburn	0		Bryn_Mawr	0
Birla_Institute_of_Technology_and_Science	0		Academy_of_Sciences_Prague	0		Appalachian_College_of_Pharmacy	0		American_College_of_Veterinary	0		Technion_Israel_Institute_of_Technology	1		Academy_of_Sciences_of_Ukraine	0		Baylor	0		Bogazici_University	0		American_University_of_Antigua	0		University_of_Wales	1		Australian_National_University	0		American_College_of_Veterinary_Clinical_Pharmacology	0		Albert_Szent-Gyorgyi_Medical_University	0		Augusta	0		American_University_of_the_Caribbean_Miami	0		Augusta	0		Bulgarian_Academy_of_Sciences	0
BJ_Medical_College	0		Academy_of_Sciences_Russia	0		Arabian_Gulf_University	0		American_College_of_Veterinary_Anesthesiologists	0		Tehran_University_of_Medical_Sciences	1		Academy_of_Sciences_Prague	0		Beatson_Institute_for_Cancer_Research_Glasgow_United_Kingdom	0		Bogomolets_National_Medical_University	0		American_University_of_Beirut	0		Virginia/Maryland_Regional_College_of_Veterinary_Medicine	1		Autonomous_National_University_of_Honduras	0		American_College_of_Veterinary_Internal_Medicine	0		Albertus_Magnus_College	0		Australian_National_University	0		Andhra_Medical_College	0		Autonomous_National_University_of_Honduras	0		Buryate_State_Agricultural_Academy	0
Bloodcenter_of_Wisconsin_Inc	0		Academy_Of_Sciences_Slovakia	0		ARC_Poultry_Research_Center	0		American_College_of_Veterinary_Clinical_Pharmacology	0		Texas_Tech	1		Academy_Of_Sciences_Slovakia	0		Beihang_University	0		Bogomoletz_Institute_of_Physiology	0		American_University_Of_Caribbean	0		William_&_Mary	1		Autonomous_University_of_Barcelona	0		American_College_of_Veterinary_Pathologists	0		Alexandria_University	0		Autonomous_National_University_of_Honduras	0		Andhra_University	0		Autonomous_University_of_Barcelona	0		Butler_University	0
Bocconi_University	0		Academy_of_Sciences_Ukraine	0		Arcadia_University	0		American_College_of_Veterinary_Internal_Medicine	0		Texas_Woman's	1		Academy_of_Sciences_Ukraine	0		Beijing_Capital_Medical_University	0		Boise_State	0		American_University_of_the_Caribbean_Miami	0		William_Mitchell_College_of_Law	1		Autonomous_University_of_Madrid	0		American_College_of_Veterinary_Surgeons	0		Alexandru_Ioan_Cuza_University	0		Autonomous_University_of_Barcelona	0		Andrews	0		Autonomous_University_of_Madrid	0		Cairo_University	0
Bogazici_University	0		Adam_Mickiewicz_University	0		Argosy_University_Atlanta	0		American_College_of_Veterinary_Pathologists	0		Tokyo_Medical_and_Dental_University	1		Adam_Mickiewicz_University	0		Beijing_Institute_for_Biotechnology	0		Bolan_Medical_College	0		Andhra_Medical_College	0		Zhejiang_Medical_University	1		Azabu_University	0		American_College_of_Zoological_Medicine	0		Alfred	0		Autonomous_University_of_Madrid	0		Anhui_Medical_University	0		Azabu_University	0		Calcutta_National_Medical_College	0
Bogomolets_National_Medical_University	0		Addis_Ababa_University	0		Argosy_University_Sarasota	0		American_College_of_Veterinary_Surgeons	0		Topiwala_National_Medical_College	1		Addis_Ababa_University	0		Beijing_Institute_of_Pharmacology	0		Bose_Institute_Calcutta	0		Andhra_University	0		A_T_Still_University	0		Azerbaijan_National_Academy_of_Sciences	0		American_School_of_Professional_Psychology_Honolulu_Hawaii	0		Aligarh_Muslim_University	0		Azabu_University	0		Anna_University_Chennai	0		Azerbaijan_National_Academy_of_Sciences	0		Calicut_Medical_College	0
Bogomoletz_Institute_of_Physiology	0		Aga_Khan_University	0		Argosy_University_Washington_DC	0		American_College_of_Zoological_Medicine	0		Touro_University_College_Of_Osteopathic_Medicine	1		Aga_Khan_University	0		Beijing_Institute_of_Pharmacology_and_Toxicology	0		Boston_College	0		Andrews	0		Aarhus_University	0		Azusa_Pacific	0		American_Sentinel_University_Denver_Colorado	0		All_India_Institute_of_Medical_Sciences	0		Azerbaijan_National_Academy_of_Sciences	0		Annaba_Medical_School_of_Algeria	0		Azusa_Pacific	0		California_Coast_University	0
Boise_State	0		Agence_Nationale_de_Securite	0		Argosy_University-Twin_Cities	0		American_School_of_Professional_Psychology_Honolulu_Hawaii	0		UC_Santa_Barbara	1		Agence_Nationale_de_Securite	0		Beijing_Medical_University	0		Bournemouth_University_United_Kingdom	0		Anhui_Medical_University	0		Academia_of_Sciences_Romania	0		Baba_Raghav_Das_Medical_College	0		American_University_of_Antigua	0		Alliant_International	0		Azusa_Pacific	0		Annamalai_University	0		Baba_Raghav_Das_Medical_College	0		California_Institute_of_Integral_Studies	0
Bolan_Medical_College	0		Agra_University	0		Aristotle_University_of_Thessaloniki	0		American_Sentinel_University_Denver_Colorado	0		Uniformed_Services_University	1		Agra_University	0		Beijing_Normal_University	0		Bowling_Green_State	0		Anna_University_Chennai	0		Academia_Sinica_Taiwan	0		Babasaheb_Bhimrao_Ambedkar_University	0		American_University_Of_Caribbean	0		American	0		Baba_Raghav_Das_Medical_College	0		Antioch_School_of_Law	0		Babasaheb_Bhimrao_Ambedkar_University	0		California_Polytechnic_State_University_San_Luis_Obispo	0
Bose_Institute_Calcutta	0		Agrophysical_Research_Institute	0		Arkansas_State	0		American_University_of_Antigua	0		Universidad_de_Alicante	1		Agrophysical_Research_Institute	0		Bejing_Institute_of_Radiation_Medicine	0		Brescia_University	0		Annaba_Medical_School_of_Algeria	0		Academy_of_Agricultural_and_Forestry_Sciences	0		Babes-Bolyai_University	0		American_University_of_the_Caribbean_Miami	0		American_College_of_Veterinary	0		Babasaheb_Bhimrao_Ambedkar_University	0		Appalachian_College_of_Pharmacy	0		Babes-Bolyai_University	0		California_School_of_Professional_Psychology_Alameda	0
Boston_College	0		Ahmadu_Bello_University	0		Arkhangelsk_Medical_Institute	0		American_University_of_Beirut	0		Universidad_Pontifica_Bolivariana	1		Ahmadu_Bello_University	0		Belarusian_State_Medical_University	0		Brigham_Young	0		Annamalai_University	0		Academy_of_Agricultural_Sciences_Sofia_Bulgaria	0		Bach_Institute_of_Biochemistry_Moscow	0		Andhra_Medical_College	0		American_College_of_Veterinary_Anesthesiologists	0		Babes-Bolyai_University	0		Arabian_Gulf_University	0		Bach_Institute_of_Biochemistry_Moscow	0		California_School_of_Professional_Psychology_Berkeley	0
Bournemouth_University_United_Kingdom	0		Ain_Shams_University	0		Armed_Forces_Medical_College	0		American_University_Of_Caribbean	0		Universita'_Degli_Studi_Di_Genova	1		Ain_Shams_University	0		Belarusian_State_University	0		Brock_University	0		Antioch_School_of_Law	0		Academy_of_Agriculture_Poland	0		Ball_State	0		Andhra_University	0		American_College_of_Veterinary_Clinical_Pharmacology	0		Bach_Institute_of_Biochemistry_Moscow	0		ARC_Poultry_Research_Center	0		Banaras_Hindu_University	0		California_School_of_Professional_Psychology_Fresno	0
Bowling_Green_State	0		Aix-Marseille_University	0		Armenian_National_Academy_of_Sciences	0		American_University_of_the_Caribbean_Miami	0		Universite_Victor_Segalen	1		Aix-Marseille_University	0		Bellarmine_University	0		Brooklyn_College_(CUNY)	0		Appalachian_College_of_Pharmacy	0		Academy_of_Medical_Science_Russia	0		Banaras_Hindu_University	0		Andrews	0		American_College_of_Veterinary_Internal_Medicine	0		Ball_State	0		Arcadia_University	0		Bangalore_Medical_College	0		California_School_of_Professional_Psychology_Los_Angeles	0
Brescia_University	0		Ajou_University	0		Arndt_University	0		Andhra_Medical_College	0		University_College_London	1		Ajou_University	0		Belmont_University	0		Brooklyn_Law_School	0		Arabian_Gulf_University	0		Academy_of_Medical_Sciences_Russia	0		Bangalore_Medical_College	0		Anhui_Medical_University	0		American_College_of_Veterinary_Pathologists	0		Banaras_Hindu_University	0		Argosy_University_Atlanta	0		Bangalore_University	0		California_School_of_Professional_Psychology_San_Diego	0
Brigham_Young	0		Akita_University	0		Ashland_University	0		Andhra_University	0		University_Grenoble_Alpes	1		Akita_University	0		Belorussian_State_Medical_University	0		Brunel_University	0		ARC_Poultry_Research_Center	0		Academy_of_Medical_Sciences_United_Kingdom	0		Bangalore_University	0		Anna_University_Chennai	0		American_College_of_Veterinary_Surgeons	0		Bangalore_Medical_College	0		Argosy_University_Sarasota	0		Bangor_University	0		California_School_of_Professional_Psychology_San_Francisco	0
Brock_University	0		Alabama_A&M	0		Aston_University	0		Andrews	0		University_of_Alabama	1		Alabama_A&M	0		Ben-Gurion_University_of_the_Negev	0		Bryn_Mawr	0		Arcadia_University	0		Academy_of_Medicine_Bialystok	0		Bangor_University	0		Annaba_Medical_School_of_Algeria	0		American_College_of_Zoological_Medicine	0		Bangalore_University	0		Argosy_University_Washington_DC	0		Bar-Ilan_University	0		California_State_University_Channel_Islands	0
Brooklyn_College_(CUNY)	0		Alabama_State	0		Auburn	0		Anhui_Medical_University	0		University_of_Alberta	1		Alabama_State	0		Benedictine	0		Bulgarian_Academy_of_Sciences	0		Argosy_University_Atlanta	0		Academy_of_Medicine_Poland	0		Bar-Ilan_University	0		Annamalai_University	0		American_School_of_Professional_Psychology_Honolulu_Hawaii	0		Bangor_University	0		Argosy_University-Twin_Cities	0		Barkatullah_University_Bhopal_India	0		Campbell_University	0
Brooklyn_Law_School	0		Albany_College_of_Pharmacy_and_Health_Sciences	0		Autonomous_National_University_of_Honduras	0		Anna_University_Chennai	0		University_of_Arizona	1		Albany_College_of_Pharmacy_and_Health_Sciences	0		Bengbu_Medical_College	0		Buryate_State_Agricultural_Academy	0		Argosy_University_Sarasota	0		Academy_of_Science_Berlin	0		Barkatullah_University_Bhopal_India	0		Antioch_School_of_Law	0		American_Sentinel_University_Denver_Colorado	0		Bar-Ilan_University	0		Aristotle_University_of_Thessaloniki	0		Barry	0		Capella_University	0
Brown	0		Albert_Szent-Gyorgyi_Medical_University	0		Autonomous_University_of_Barcelona	0		Annaba_Medical_School_of_Algeria	0		University_of_Baghdad	1		Albert_Szent-Gyorgyi_Medical_University	0		Benha_University	0		Butler_University	0		Argosy_University_Washington_DC	0		Academy_of_Science_Minsk	0		Barry	0		Appalachian_College_of_Pharmacy	0		American_University_of_Antigua	0		Barkatullah_University_Bhopal_India	0		Arkansas_State	0		Bashkir_State_University	0		Capital_University	0
Brunel_University	0		Albertus_Magnus_College	0		Azabu_University	0		Annamalai_University	0		University_of_Bordeaux	1		Alexandria_University	0		Bernard_University	0		Cairo_University	0		Argosy_University-Twin_Cities	0		Academy_of_Sciences_Budapest	0		Bashkir_State_University	0		Arabian_Gulf_University	0		American_University_of_Beirut	0		Barry	0		Arkhangelsk_Medical_Institute	0		Baylor	0		Cappella_University	0
Bryn_Mawr	0		Alexandria_University	0		Azerbaijan_National_Academy_of_Sciences	0		Antioch_School_of_Law	0		University_of_Bradford	1		Alexandru_Ioan_Cuza_University	0		Bharathidasan_University	0		Calcutta_National_Medical_College	0		Aristotle_University_of_Thessaloniki	0		Academy_of_Sciences_Hungary	0		Beatson_Institute_for_Cancer_Research_Glasgow_United_Kingdom	0		ARC_Poultry_Research_Center	0		American_University_Of_Caribbean	0		Bashkir_State_University	0		Armenian_National_Academy_of_Sciences	0		Beatson_Institute_for_Cancer_Research_Glasgow_United_Kingdom	0		Cardiff_University	0
Bulgarian_Academy_of_Sciences	0		Alexandru_Ioan_Cuza_University	0		Azusa_Pacific	0		Appalachian_College_of_Pharmacy	0		University_of_Cambridge	1		Alfred	0		BHU_Institute_of_Technology	0		Calicut_Medical_College	0		Arkansas_State	0		Academy_of_Sciences_of_Ukraine	0		Beihang_University	0		Arcadia_University	0		American_University_of_the_Caribbean_Miami	0		Baylor	0		Arndt_University	0		Beihang_University	0		Cardinal_Stritch	0
Buryate_State_Agricultural_Academy	0		Alfred	0		Baba_Raghav_Das_Medical_College	0		Arabian_Gulf_University	0		University_of_Debrecen	1		Aligarh_Muslim_University	0		Bielefeld_University	0		California_Coast_University	0		Arkhangelsk_Medical_Institute	0		Academy_of_Sciences_Prague	0		Beijing_Capital_Medical_University	0		Argosy_University_Atlanta	0		Andhra_Medical_College	0		Beihang_University	0		Ashland_University	0		Beijing_Capital_Medical_University	0		Carleton_University	0
Butler_University	0		Aligarh_Muslim_University	0		Babasaheb_Bhimrao_Ambedkar_University	0		ARC_Poultry_Research_Center	0		University_of_Delaware	1		All_India_Institute_of_Medical_Sciences	0		Bilkent_University	0		California_Institute_of_Integral_Studies	0		Armed_Forces_Medical_College	0		Academy_Of_Sciences_Slovakia	0		Beijing_Institute_for_Biotechnology	0		Argosy_University_Sarasota	0		Andhra_University	0		Beijing_Capital_Medical_University	0		Aston_University	0		Beijing_Institute_for_Biotechnology	0		Carlos_Albizu_University	0
Cairo_University	0		All-Union_Cancer_Research_Center	0		Babes-Bolyai_University	0		Arcadia_University	0		University_of_East_Anglia	1		All-Union_Cancer_Research_Center	0		Biola	0		California_Polytechnic_State_University_San_Luis_Obispo	0		Armenian_National_Academy_of_Sciences	0		Adam_Mickiewicz_University	0		Beijing_Institute_of_Pharmacology	0		Argosy_University_Washington_DC	0		Andrews	0		Beijing_Institute_for_Biotechnology	0		Auburn	0		Beijing_Institute_of_Pharmacology	0		Carlow_University	0
Calcutta_National_Medical_College	0		Allegheny_University_of_the_Health_Sciences	0		Bach_Institute_of_Biochemistry_Moscow	0		Argosy_University_Atlanta	0		University_of_Essex	1		Allegheny_University_of_the_Health_Sciences	0		Biozentrum_Wuerzburg	0		California_School_of_Professional_Psychology_Alameda	0		Arndt_University	0		Addis_Ababa_University	0		Beijing_Institute_of_Pharmacology_and_Toxicology	0		Argosy_University-Twin_Cities	0		Anhui_Medical_University	0		Beijing_Institute_of_Pharmacology	0		Augusta	0		Beijing_Institute_of_Pharmacology_and_Toxicology	0		Carnegie_Institute_of_Technology	0
Calicut_Medical_College	0		Alliant_International	0		Ball_State	0		Argosy_University_Sarasota	0		University_of_Freiburg	1		Alliant_International	0		Birkbeck_College	0		California_School_of_Professional_Psychology_Berkeley	0		Ashland_University	0		Aga_Khan_University	0		Beijing_Medical_University	0		Aristotle_University_of_Thessaloniki	0		Anna_University_Chennai	0		Beijing_Institute_of_Pharmacology_and_Toxicology	0		Autonomous_National_University_of_Honduras	0		Beijing_Medical_University	0		Carnegie_Mellon	0
California_Coast_University	0		American_College_of_Veterinary	0		Banaras_Hindu_University	0		Argosy_University_Washington_DC	0		University_of_Giessen	1		American	0		Birla_Institute_of_Technology_and_Science	0		California_School_of_Professional_Psychology_Fresno	0		Aston_University	0		Agence_Nationale_de_Securite	0		Beijing_Normal_University	0		Arkansas_State	0		Annaba_Medical_School_of_Algeria	0		Beijing_Medical_University	0		Autonomous_University_of_Barcelona	0		Beijing_Normal_University	0		Carol_Davila_University_of_Medicine	0
California_Institute_of_Integral_Studies	0		American_College_of_Veterinary_Anesthesiologists	0		Bangalore_Medical_College	0		Argosy_University-Twin_Cities	0		University_of_Gottingen	1		American_College_of_Veterinary	0		BJ_Medical_College	0		California_School_of_Professional_Psychology_Los_Angeles	0		Auburn	0		Agra_University	0		Bejing_Institute_of_Radiation_Medicine	0		Arkhangelsk_Medical_Institute	0		Annamalai_University	0		Beijing_Normal_University	0		Autonomous_University_of_Madrid	0		Bejing_Institute_of_Radiation_Medicine	0		Case_Western_Reserve	0
California_Polytechnic_State_University_San_Luis_Obispo	0		American_College_of_Veterinary_Clinical_Pharmacology	0		Bangalore_University	0		Aristotle_University_of_Thessaloniki	0		University_of_Grenoble	1		American_College_of_Veterinary_Anesthesiologists	0		Bloodcenter_of_Wisconsin_Inc	0		California_School_of_Professional_Psychology_San_Diego	0		Augusta	0		Agrophysical_Research_Institute	0		Belarusian_State_Medical_University	0		Armed_Forces_Medical_College	0		Antioch_School_of_Law	0		Bejing_Institute_of_Radiation_Medicine	0		Azabu_University	0		Belarusian_State_Medical_University	0		Catholic_University_Eichstätt-Ingolstadt	0
California_School_of_Professional_Psychology_Alameda	0		American_College_of_Veterinary_Internal_Medicine	0		Bangor_University	0		Arkansas_State	0		University_of_Heidelberg	1		American_College_of_Veterinary_Clinical_Pharmacology	0		Bocconi_University	0		California_School_of_Professional_Psychology_San_Francisco	0		Australian_National_University	0		Ahmadu_Bello_University	0		Belarusian_State_University	0		Armenian_National_Academy_of_Sciences	0		Appalachian_College_of_Pharmacy	0		Belarusian_State_Medical_University	0		Azerbaijan_National_Academy_of_Sciences	0		Belarusian_State_University	0		Catholic_University_of_America	0
California_School_of_Professional_Psychology_Berkeley	0		American_College_of_Veterinary_Pathologists	0		Bar-Ilan_University	0		Arkhangelsk_Medical_Institute	0		University_of_Leicester	1		American_College_of_Veterinary_Internal_Medicine	0		Bogazici_University	0		California_State_University_Channel_Islands	0		Autonomous_National_University_of_Honduras	0		Ain_Shams_University	0		Bellarmine_University	0		Arndt_University	0		Arabian_Gulf_University	0		Belarusian_State_University	0		Azusa_Pacific	0		Bellarmine_University	0		Catholic_University_of_Leuven	0
California_School_of_Professional_Psychology_Fresno	0		American_College_of_Veterinary_Surgeons	0		Barkatullah_University_Bhopal_India	0		Armed_Forces_Medical_College	0		University_of_Leipzig	1		American_College_of_Veterinary_Pathologists	0		Bogomolets_National_Medical_University	0		Campbell_University	0		Autonomous_University_of_Barcelona	0		Aix-Marseille_University	0		Belmont_University	0		Ashland_University	0		ARC_Poultry_Research_Center	0		Bellarmine_University	0		Baba_Raghav_Das_Medical_College	0		Belmont_University	0		Catholic_University_of_Milan	0
California_School_of_Professional_Psychology_Los_Angeles	0		American_College_of_Zoological_Medicine	0		Barry	0		Armenian_National_Academy_of_Sciences	0		University_of_Minnesota_Medical_School	1		American_College_of_Veterinary_Surgeons	0		Bogomoletz_Institute_of_Physiology	0		Capella_University	0		Autonomous_University_of_Madrid	0		Ajou_University	0		Belorussian_State_Medical_University	0		Aston_University	0		Arcadia_University	0		Belmont_University	0		Babasaheb_Bhimrao_Ambedkar_University	0		Belorussian_State_Medical_University	0		Catholic_University_of_Rome	0
California_School_of_Professional_Psychology_San_Diego	0		American_School_of_Professional_Psychology_Honolulu_Hawaii	0		Bashkir_State_University	0		Arndt_University	0		University_of_Mississippi	1		American_College_of_Zoological_Medicine	0		Boise_State	0		Capital_University	0		Azabu_University	0		Akita_University	0		Ben-Gurion_University_of_the_Negev	0		Australian_National_University	0		Argosy_University_Atlanta	0		Belorussian_State_Medical_University	0		Babes-Bolyai_University	0		Ben-Gurion_University_of_the_Negev	0		Catholic_University_of_the_Sacred_Heart_Rome	0
California_School_of_Professional_Psychology_San_Francisco	0		American_Sentinel_University_Denver_Colorado	0		Baylor	0		Ashland_University	0		University_of_Montreal	1		American_School_of_Professional_Psychology_Honolulu_Hawaii	0		Bolan_Medical_College	0		Cappella_University	0		Azerbaijan_National_Academy_of_Sciences	0		Alabama_A&M	0		Benedictine	0		Autonomous_National_University_of_Honduras	0		Argosy_University_Sarasota	0		Ben-Gurion_University_of_the_Negev	0		Bach_Institute_of_Biochemistry_Moscow	0		Benedictine	0		Catholic_University_School_of_Medicine_Rome	0
California_State_University_Channel_Islands	0		American_University_of_Antigua	0		Beatson_Institute_for_Cancer_Research_Glasgow_United_Kingdom	0		Auburn	0		University_of_Nebraska_Medical_Center	1		American_Sentinel_University_Denver_Colorado	0		Bose_Institute_Calcutta	0		Cardiff_University	0		Azusa_Pacific	0		Alabama_State	0		Bengbu_Medical_College	0		Autonomous_University_of_Barcelona	0		Argosy_University_Washington_DC	0		Benedictine	0		Ball_State	0		Bengbu_Medical_College	0		Catholic_University_Silva_Henriquez	0
Campbell_University	0		American_University_of_Beirut	0		Beihang_University	0		Autonomous_National_University_of_Honduras	0		University_of_New_Mexico	1		American_University_of_Antigua	0		Boston_College	0		Cardinal_Stritch	0		Baba_Raghav_Das_Medical_College	0		Albany_College_of_Pharmacy_and_Health_Sciences	0		Benha_University	0		Azabu_University	0		Argosy_University-Twin_Cities	0		Bengbu_Medical_College	0		Banaras_Hindu_University	0		Benha_University	0		Cayetano_Heredia_University	0
Capella_University	0		American_University_Of_Caribbean	0		Beijing_Capital_Medical_University	0		Autonomous_University_of_Barcelona	0		University_of_Oregon	1		American_University_of_Beirut	0		Bournemouth_University_United_Kingdom	0		Carleton_University	0		Babasaheb_Bhimrao_Ambedkar_University	0		Albany_Medical_College	0		Bernard_University	0		Azerbaijan_National_Academy_of_Sciences	0		Arkansas_State	0		Benha_University	0		Bangalore_Medical_College	0		Bernard_University	0		Ceara_State_University	0
Capital_University	0		American_University_of_the_Caribbean_Miami	0		Beijing_Institute_for_Biotechnology	0		Azabu_University	0		University_of_Ottawa	1		American_University_Of_Caribbean	0		Bowling_Green_State	0		Carlos_Albizu_University	0		Babes-Bolyai_University	0		Albert_Einstein_College_of_Medicine	0		Bharathidasan_University	0		Azusa_Pacific	0		Arkhangelsk_Medical_Institute	0		Bernard_University	0		Bangalore_University	0		Bharathidasan_University	0		Cedars-Sinai_Medical_Center	0
Cappella_University	0		Andhra_Medical_College	0		Beijing_Institute_of_Pharmacology	0		Azerbaijan_National_Academy_of_Sciences	0		University_of_Paris_V_(Paris_Descartes)	1		Andhra_Medical_College	0		Brescia_University	0		Carlow_University	0		Bach_Institute_of_Biochemistry_Moscow	0		Albert_Szent-Gyorgyi_Medical_University	0		BHU_Institute_of_Technology	0		Baba_Raghav_Das_Medical_College	0		Armed_Forces_Medical_College	0		Bharathidasan_University	0		Bangor_University	0		BHU_Institute_of_Technology	0		Center_for_Molecular_Neurobiology_Hamburg	0
Cardiff_University	0		Andhra_University	0		Beijing_Institute_of_Pharmacology_and_Toxicology	0		Azusa_Pacific	0		University_of_Patras	1		Andhra_University	0		Brigham_Young	0		Carnegie_Institute_of_Technology	0		Ball_State	0		Albertus_Magnus_College	0		Bielefeld_University	0		Babasaheb_Bhimrao_Ambedkar_University	0		Armenian_National_Academy_of_Sciences	0		BHU_Institute_of_Technology	0		Bar-Ilan_University	0		Bilkent_University	0		Center_For_Research_And_Advanced_Studies	0
Cardinal_Stritch	0		Andrews	0		Beijing_Normal_University	0		Baba_Raghav_Das_Medical_College	0		University_of_Perugia	1		Andrews	0		Brock_University	0		Carol_Davila_University_of_Medicine	0		Banaras_Hindu_University	0		Alexandria_University	0		Bilkent_University	0		Babes-Bolyai_University	0		Arndt_University	0		Bielefeld_University	0		Barkatullah_University_Bhopal_India	0		Biola	0		Central_Drug_Research_Institute	0
Carleton_University	0		Anhui_Medical_University	0		Bejing_Institute_of_Radiation_Medicine	0		Babasaheb_Bhimrao_Ambedkar_University	0		University_of_Picardie_Amiens	1		Anhui_Medical_University	0		Brooklyn_Law_School	0		Catholic_University_Eichstätt-Ingolstadt	0		Bangalore_Medical_College	0		Alexandru_Ioan_Cuza_University	0		Biola	0		Bach_Institute_of_Biochemistry_Moscow	0		Ashland_University	0		Bilkent_University	0		Barry	0		Biozentrum_Wuerzburg	0		Central_Food_Technological_Research_Institute	0
Carlos_Albizu_University	0		Anna_University_Chennai	0		Belarusian_State_Medical_University	0		Babes-Bolyai_University	0		University_of_Punjab	1		Anna_University_Chennai	0		Brunel_University	0		Catholic_University_of_America	0		Bangalore_University	0		Alfred	0		Biozentrum_Wuerzburg	0		Ball_State	0		Aston_University	0		Biola	0		Bashkir_State_University	0		Birkbeck_College	0		Central_Institute_of_Physical_Culture_Russia	0
Carlow_University	0		Annaba_Medical_School_of_Algeria	0		Belarusian_State_University	0		Bach_Institute_of_Biochemistry_Moscow	0		University_of_Queensland	1		Annaba_Medical_School_of_Algeria	0		Bryn_Mawr	0		Catholic_University_of_Milan	0		Bangor_University	0		Aligarh_Muslim_University	0		Birkbeck_College	0		Banaras_Hindu_University	0		Auburn	0		Biozentrum_Wuerzburg	0		Baylor	0		Birla_Institute_of_Technology_and_Science	0		Central_Michigan	0
Carnegie_Institute_of_Technology	0		Annamalai_University	0		Bellarmine_University	0		Banaras_Hindu_University	0		University_of_Rhode_Island	1		Annamalai_University	0		Bulgarian_Academy_of_Sciences	0		Catholic_University_of_Rome	0		Bar-Ilan_University	0		All_India_Institute_of_Medical_Sciences	0		Birla_Institute_of_Technology_and_Science	0		Bangalore_Medical_College	0		Augusta	0		Birkbeck_College	0		Beatson_Institute_for_Cancer_Research_Glasgow_United_Kingdom	0		BJ_Medical_College	0		Central_Queensland_University	0
Carnegie_Mellon	0		Antioch_School_of_Law	0		Belmont_University	0		Bangalore_University	0		University_of_Santo_Tomas_Philippines	1		Antioch_School_of_Law	0		Buryate_State_Agricultural_Academy	0		Catholic_University_of_the_Sacred_Heart_Rome	0		Barkatullah_University_Bhopal_India	0		All-Union_Cancer_Research_Center	0		BJ_Medical_College	0		Bangalore_University	0		Australian_National_University	0		Birla_Institute_of_Technology_and_Science	0		Beihang_University	0		Bloodcenter_of_Wisconsin_Inc	0		Central_South_University	0
Carol_Davila_University_of_Medicine	0		Appalachian_College_of_Pharmacy	0		Belorussian_State_Medical_University	0		Bangor_University	0		University_of_South_Florida	1		Appalachian_College_of_Pharmacy	0		Cairo_University	0		Catholic_University_School_of_Medicine_Rome	0		Barry	0		Allegheny_University_of_the_Health_Sciences	0		Bloodcenter_of_Wisconsin_Inc	0		Bangor_University	0		Autonomous_National_University_of_Honduras	0		BJ_Medical_College	0		Beijing_Capital_Medical_University	0		Bocconi_University	0		Central_University_of_Ecuador	0
Case_Western_Reserve	0		Arabian_Gulf_University	0		Ben-Gurion_University_of_the_Negev	0		Bar-Ilan_University	0		University_of_Southern_California	1		Arabian_Gulf_University	0		Calcutta_National_Medical_College	0		Catholic_University_Silva_Henriquez	0		Bashkir_State_University	0		Alliant_International	0		Bocconi_University	0		Bar-Ilan_University	0		Autonomous_University_of_Madrid	0		Bloodcenter_of_Wisconsin_Inc	0		Beijing_Institute_for_Biotechnology	0		Bogazici_University	0		Central_University_of_Venezuela	0
Catholic_University_Eichstätt-Ingolstadt	0		ARC_Poultry_Research_Center	0		Benedictine	0		Barkatullah_University_Bhopal_India	0		University_of_Southern_Queensland	1		ARC_Poultry_Research_Center	0		Calicut_Medical_College	0		Cayetano_Heredia_University	0		Baylor	0		American	0		Bogazici_University	0		Barkatullah_University_Bhopal_India	0		Azabu_University	0		Bocconi_University	0		Beijing_Institute_of_Pharmacology	0		Bogomolets_National_Medical_University	0		Centre_for_Cellular_&_Molecular_Biology	0
Catholic_University_of_America	0		Arcadia_University	0		Bengbu_Medical_College	0		Barry	0		University_of_Texas_Health_Science_Center_Campus_Unknown	1		Arcadia_University	0		California_Coast_University	0		Ceara_State_University	0		Beatson_Institute_for_Cancer_Research_Glasgow_United_Kingdom	0		American_College_of_Veterinary	0		Bogomolets_National_Medical_University	0		Barry	0		Azerbaijan_National_Academy_of_Sciences	0		Bogazici_University	0		Beijing_Institute_of_Pharmacology_and_Toxicology	0		Bogomoletz_Institute_of_Physiology	0		Centro_de_Investigaciones	0
Catholic_University_of_Leuven	0		Argosy_University_Atlanta	0		Benha_University	0		Bashkir_State_University	0		University_of_the_East	1		Argosy_University_Atlanta	0		California_Institute_of_Integral_Studies	0		Cedars-Sinai_Medical_Center	0		Beihang_University	0		American_College_of_Veterinary_Anesthesiologists	0		Bogomoletz_Institute_of_Physiology	0		Bashkir_State_University	0		Azusa_Pacific	0		Bogomolets_National_Medical_University	0		Beijing_Medical_University	0		Boise_State	0		Centro_Eleia_Actividades_Psicologicas	0
Catholic_University_of_Milan	0		Argosy_University_Sarasota	0		Bernard_University	0		Baylor	0		University_of_the_Philippines	1		Argosy_University_Sarasota	0		California_Polytechnic_State_University_San_Luis_Obispo	0		Center_for_Molecular_Neurobiology_Hamburg	0		Beijing_Capital_Medical_University	0		American_College_of_Veterinary_Clinical_Pharmacology	0		Boise_State	0		Baylor	0		Baba_Raghav_Das_Medical_College	0		Boise_State	0		Beijing_Normal_University	0		Bolan_Medical_College	0		Chalmers_University_of_Technology	0
Catholic_University_of_Rome	0		Argosy_University_Washington_DC	0		Bharathidasan_University	0		Baylor_College_of_Medicine	0		University_of_the_Witwatersrand	1		Argosy_University_Washington_DC	0		California_School_of_Professional_Psychology_Alameda	0		Center_For_Research_And_Advanced_Studies	0		Beijing_Institute_for_Biotechnology	0		American_College_of_Veterinary_Internal_Medicine	0		Bolan_Medical_College	0		Baylor_College_of_Medicine	0		Babasaheb_Bhimrao_Ambedkar_University	0		Bolan_Medical_College	0		Bejing_Institute_of_Radiation_Medicine	0		Bose_Institute_Calcutta	0		Chamberlain_University-Illinois	0
Catholic_University_of_the_Sacred_Heart_Rome	0		Argosy_University-Twin_Cities	0		BHU_Institute_of_Technology	0		Beatson_Institute_for_Cancer_Research_Glasgow_United_Kingdom	0		University_of_Tokushima	1		Argosy_University-Twin_Cities	0		California_School_of_Professional_Psychology_Berkeley	0		Central_Drug_Research_Institute	0		Beijing_Institute_of_Pharmacology	0		American_College_of_Veterinary_Pathologists	0		Bose_Institute_Calcutta	0		Beatson_Institute_for_Cancer_Research_Glasgow_United_Kingdom	0		Babes-Bolyai_University	0		Bose_Institute_Calcutta	0		Belarusian_State_Medical_University	0		Boston_College	0		Changchun_University	0
Catholic_University_School_of_Medicine_Rome	0		Aristotle_University_of_Thessaloniki	0		Bielefeld_University	0		Beihang_University	0		University_of_Toronto	1		Aristotle_University_of_Thessaloniki	0		California_School_of_Professional_Psychology_Fresno	0		Central_Food_Technological_Research_Institute	0		Beijing_Institute_of_Pharmacology_and_Toxicology	0		American_College_of_Veterinary_Surgeons	0		Boston_College	0		Beihang_University	0		Bach_Institute_of_Biochemistry_Moscow	0		Boston_College	0		Belarusian_State_University	0		Bournemouth_University_United_Kingdom	0		Chapman_University	0
Catholic_University_Silva_Henriquez	0		Arizona_State	0		Bilkent_University	0		Beijing_Capital_Medical_University	0		University_of_Turin	1		Arizona_State	0		California_School_of_Professional_Psychology_Los_Angeles	0		Central_Institute_of_Physical_Culture_Russia	0		Beijing_Medical_University	0		American_College_of_Zoological_Medicine	0		Bournemouth_University_United_Kingdom	0		Beijing_Capital_Medical_University	0		Ball_State	0		Bournemouth_University_United_Kingdom	0		Bellarmine_University	0		Bowling_Green_State	0		Charing_Cross_and_Westminster_Medical_Schools	0
Cayetano_Heredia_University	0		Arkansas_State	0		Biola	0		Beijing_Institute_for_Biotechnology	0		University_of_Vienna	1		Arkansas_State	0		California_School_of_Professional_Psychology_San_Diego	0		Central_Michigan	0		Beijing_Normal_University	0		American_School_of_Professional_Psychology_Honolulu_Hawaii	0		Bowling_Green_State	0		Beijing_Institute_for_Biotechnology	0		Banaras_Hindu_University	0		Bowling_Green_State	0		Belmont_University	0		Brandeis	0		Charite_University_Medicine	0
Ceara_State_University	0		Arkhangelsk_Medical_Institute	0		Biozentrum_Wuerzburg	0		Beijing_Institute_of_Pharmacology	0		University_of_Wroclaw	1		Arkhangelsk_Medical_Institute	0		California_School_of_Professional_Psychology_San_Francisco	0		Central_Queensland_University	0		Bejing_Institute_of_Radiation_Medicine	0		American_Sentinel_University_Denver_Colorado	0		Brescia_University	0		Beijing_Institute_of_Pharmacology	0		Bangalore_Medical_College	0		Brandeis	0		Belorussian_State_Medical_University	0		Brescia_University	0		Charles_University_in_Prague	0
Cedars-Sinai_Medical_Center	0		Armed_Forces_Medical_College	0		Birkbeck_College	0		Beijing_Institute_of_Pharmacology_and_Toxicology	0		University_of_Zagreb	1		Armed_Forces_Medical_College	0		California_State_University_Channel_Islands	0		Central_South_University	0		Belarusian_State_Medical_University	0		American_University_of_Antigua	0		Brigham_Young	0		Beijing_Institute_of_Pharmacology_and_Toxicology	0		Bangalore_University	0		Brescia_University	0		Ben-Gurion_University_of_the_Negev	0		Brigham_Young	0		Chatham_University	0
Center_for_Molecular_Neurobiology_Hamburg	0		Armenian_National_Academy_of_Sciences	0		Birla_Institute_of_Technology_and_Science	0		Beijing_Medical_University	0		UT_Health_Science_Center_at_San_Antonio	1		Armenian_National_Academy_of_Sciences	0		Campbell_University	0		Central_University_of_Ecuador	0		Belarusian_State_University	0		American_University_of_Beirut	0		Brock_University	0		Beijing_Normal_University	0		Bangor_University	0		Brigham_Young	0		Benedictine	0		Brock_University	0		Chaudhary_Charan_Singh_University	0
Center_For_Research_And_Advanced_Studies	0		Arndt_University	0		BJ_Medical_College	0		Beijing_Normal_University	0		Virginia_Tech	1		Arndt_University	0		Capella_University	0		Central_University_of_Venezuela	0		Bellarmine_University	0		American_University_Of_Caribbean	0		Brooklyn_College_(CUNY)	0		Bejing_Institute_of_Radiation_Medicine	0		Bar-Ilan_University	0		Brock_University	0		Bengbu_Medical_College	0		Brooklyn_College_(CUNY)	0		Chemnitz_University_of_Technology	0
Central_Drug_Research_Institute	0		Ashland_University	0		Bloodcenter_of_Wisconsin_Inc	0		Bejing_Institute_of_Radiation_Medicine	0		Visva_Bharati_University	1		Ashland_University	0		Capital_University	0		Centre_for_Cellular_&_Molecular_Biology	0		Belmont_University	0		American_University_of_the_Caribbean_Miami	0		Brooklyn_Law_School	0		Belarusian_State_Medical_University	0		Barkatullah_University_Bhopal_India	0		Brooklyn_College_(CUNY)	0		Benha_University	0		Brooklyn_Law_School	0		Chestnut_Hill_College	0
Central_Food_Technological_Research_Institute	0		Aston_University	0		Bocconi_University	0		Belarusian_State_Medical_University	0		Vrije_Universiteit_Amsterdam	1		Aston_University	0		Cappella_University	0		Centro_de_Investigaciones	0		Belorussian_State_Medical_University	0		Andhra_Medical_College	0		Brunel_University	0		Belarusian_State_University	0		Barry	0		Brooklyn_Law_School	0		Bernard_University	0		Brunel_University	0		Chiang_Mai_University	0
Central_Institute_of_Physical_Culture_Russia	0		Auburn	0		Bogazici_University	0		Belarusian_State_University	0		Vrije_University	1		Augusta	0		Cardiff_University	0		Centro_Eleia_Actividades_Psicologicas	0		Ben-Gurion_University_of_the_Negev	0		Andhra_University	0		Bryn_Mawr	0		Bellarmine_University	0		Bashkir_State_University	0		Brunel_University	0		Bharathidasan_University	0		Bryn_Mawr	0		Chicago_College_of_Osteopathic_Medicine	0
Central_Michigan	0		Australian_National_University	0		Bogomolets_National_Medical_University	0		Bellarmine_University	0		Waynesburg_University	1		Australian_National_University	0		Cardinal_Stritch	0		Chalmers_University_of_Technology	0		Benedictine	0		Andrews	0		Bulgarian_Academy_of_Sciences	0		Belmont_University	0		Baylor	0		Bryn_Mawr	0		BHU_Institute_of_Technology	0		Bulgarian_Academy_of_Sciences	0		Chicago_Medical_School_Chicago_IL	0
Central_Queensland_University	0		Autonomous_National_University_of_Honduras	0		Bogomoletz_Institute_of_Physiology	0		Belmont_University	0		Weill_Cornell_Medicine	1		Autonomous_National_University_of_Honduras	0		Carleton_University	0		Chamberlain_University-Illinois	0		Bengbu_Medical_College	0		Anhui_Medical_University	0		Buryate_State_Agricultural_Academy	0		Belorussian_State_Medical_University	0		Beatson_Institute_for_Cancer_Research_Glasgow_United_Kingdom	0		Bulgarian_Academy_of_Sciences	0		Bielefeld_University	0		Buryate_State_Agricultural_Academy	0		Chicago_School_of_Professional_Psychology_Chicago_Campus	0
Central_South_University	0		Autonomous_University_of_Madrid	0		Boise_State	0		Belorussian_State_Medical_University	0		West_Virginia_State_University	1		Autonomous_University_of_Barcelona	0		Carlos_Albizu_University	0		Changchun_University	0		Benha_University	0		Anna_University_Chennai	0		Butler_University	0		Ben-Gurion_University_of_the_Negev	0		Beihang_University	0		Buryate_State_Agricultural_Academy	0		Bilkent_University	0		Butler_University	0		Chicago_School_of_Professional_Psychology_LA_Campus	0
Central_University_of_Ecuador	0		Azabu_University	0		Bolan_Medical_College	0		Ben-Gurion_University_of_the_Negev	0		Western_University_of_Health_Sciences	1		Autonomous_University_of_Madrid	0		Carlow_University	0		Chapman_University	0		Bernard_University	0		Annaba_Medical_School_of_Algeria	0		Cairo_University	0		Benedictine	0		Beijing_Capital_Medical_University	0		Butler_University	0		Biola	0		Cairo_University	0		China_Agricultural_University	0
Central_University_of_Venezuela	0		Azerbaijan_National_Academy_of_Sciences	0		Bose_Institute_Calcutta	0		Benedictine	0		Xian_Jiaotong_University	1		Azabu_University	0		Carnegie_Institute_of_Technology	0		Charing_Cross_and_Westminster_Medical_Schools	0		Bharathidasan_University	0		Annamalai_University	0		Calcutta_National_Medical_College	0		Bengbu_Medical_College	0		Beijing_Institute_for_Biotechnology	0		Cairo_University	0		Biozentrum_Wuerzburg	0		Calcutta_National_Medical_College	0		China_Medical_University	0
Centre_for_Cellular_&_Molecular_Biology	0		Azusa_Pacific	0		Bournemouth_University_United_Kingdom	0		Bengbu_Medical_College	0		A_T_Still_University	0		Azerbaijan_National_Academy_of_Sciences	0		Carol_Davila_University_of_Medicine	0		Charite_University_Medicine	0		BHU_Institute_of_Technology	0		Antioch_School_of_Law	0		Calicut_Medical_College	0		Benha_University	0		Beijing_Institute_of_Pharmacology	0		Calcutta_National_Medical_College	0		Birkbeck_College	0		California_Coast_University	0		China_Pharmaceutical_University_Nanjing	0
Centro_de_Investigaciones	0		Baba_Raghav_Das_Medical_College	0		Bowling_Green_State	0		Benha_University	0		Academia_of_Sciences_Romania	0		Azusa_Pacific	0		Catholic_University_Eichstätt-Ingolstadt	0		Charles_University_in_Prague	0		Bielefeld_University	0		Appalachian_College_of_Pharmacy	0		California_Coast_University	0		Bernard_University	0		Beijing_Institute_of_Pharmacology_and_Toxicology	0		Calicut_Medical_College	0		Birla_Institute_of_Technology_and_Science	0		California_Institute_of_Integral_Studies	0		China-National_University_of_Singapore	0
Centro_Eleia_Actividades_Psicologicas	0		Babasaheb_Bhimrao_Ambedkar_University	0		Brescia_University	0		Bernard_University	0		Academia_Sinica_Taiwan	0		Baba_Raghav_Das_Medical_College	0		Catholic_University_of_America	0		Chatham_University	0		Bilkent_University	0		Arabian_Gulf_University	0		California_Institute_of_Integral_Studies	0		Bharathidasan_University	0		Beijing_Medical_University	0		California_Coast_University	0		Bloodcenter_of_Wisconsin_Inc	0		California_Polytechnic_State_University_San_Luis_Obispo	0		Chinese_Academy_of_Medical_Sciences	0
Chalmers_University_of_Technology	0		Babes-Bolyai_University	0		Brigham_Young	0		Bharathidasan_University	0		Academy_of_Agricultural_and_Forestry_Sciences	0		Babasaheb_Bhimrao_Ambedkar_University	0		Catholic_University_of_Leuven	0		Chaudhary_Charan_Singh_University	0		Biola	0		ARC_Poultry_Research_Center	0		California_Polytechnic_State_University_San_Luis_Obispo	0		BHU_Institute_of_Technology	0		Beijing_Normal_University	0		California_Institute_of_Integral_Studies	0		Bocconi_University	0		California_School_of_Professional_Psychology_Alameda	0		Chinese_Academy_of_Preventative_Medicine	0
Chamberlain_University-Illinois	0		Bach_Institute_of_Biochemistry_Moscow	0		Brock_University	0		BHU_Institute_of_Technology	0		Academy_of_Agricultural_Sciences_Sofia_Bulgaria	0		Babes-Bolyai_University	0		Catholic_University_of_Milan	0		Chemnitz_University_of_Technology	0		Biozentrum_Wuerzburg	0		Arcadia_University	0		California_School_of_Professional_Psychology_Alameda	0		Bielefeld_University	0		Bejing_Institute_of_Radiation_Medicine	0		California_Polytechnic_State_University_San_Luis_Obispo	0		Bogazici_University	0		California_School_of_Professional_Psychology_Berkeley	0		Chinese_Academy_of_Sciences	0
Changchun_University	0		Banaras_Hindu_University	0		Brooklyn_College_(CUNY)	0		Bielefeld_University	0		Academy_of_Agriculture_Poland	0		Bach_Institute_of_Biochemistry_Moscow	0		Catholic_University_of_Rome	0		Chestnut_Hill_College	0		Birkbeck_College	0		Argosy_University_Atlanta	0		California_School_of_Professional_Psychology_Berkeley	0		Bilkent_University	0		Belarusian_State_Medical_University	0		California_School_of_Professional_Psychology_Alameda	0		Bogomolets_National_Medical_University	0		California_School_of_Professional_Psychology_Fresno	0		Chinese_Center_for_Disease_Control_and_Prevention	0
Chapman_University	0		Bangalore_Medical_College	0		Brooklyn_Law_School	0		Bilkent_University	0		Academy_of_Medical_Science_Russia	0		Ball_State	0		Catholic_University_of_the_Sacred_Heart_Rome	0		Chiang_Mai_University	0		Birla_Institute_of_Technology_and_Science	0		Argosy_University_Sarasota	0		California_School_of_Professional_Psychology_Fresno	0		Biola	0		Belarusian_State_University	0		California_School_of_Professional_Psychology_Berkeley	0		Bogomoletz_Institute_of_Physiology	0		California_School_of_Professional_Psychology_Los_Angeles	0		Chinese_University_of_Hong_Kong	0
Charing_Cross_and_Westminster_Medical_Schools	0		Bangalore_University	0		Brunel_University	0		Biola	0		Academy_of_Medical_Sciences_Russia	0		Banaras_Hindu_University	0		Catholic_University_School_of_Medicine_Rome	0		Chiba_University	0		BJ_Medical_College	0		Argosy_University_Washington_DC	0		California_School_of_Professional_Psychology_Los_Angeles	0		Biozentrum_Wuerzburg	0		Bellarmine_University	0		California_School_of_Professional_Psychology_Fresno	0		Boise_State	0		California_School_of_Professional_Psychology_San_Diego	0		Chittaranjan_National_Cancer_Institute	0
Charite_University_Medicine	0		Bangor_University	0		Bryn_Mawr	0		Biozentrum_Wuerzburg	0		Academy_of_Medical_Sciences_United_Kingdom	0		Bangalore_Medical_College	0		Catholic_University_Silva_Henriquez	0		Chicago_College_of_Osteopathic_Medicine	0		Bloodcenter_of_Wisconsin_Inc	0		Argosy_University-Twin_Cities	0		California_School_of_Professional_Psychology_San_Diego	0		Birkbeck_College	0		Belmont_University	0		California_School_of_Professional_Psychology_Los_Angeles	0		Bolan_Medical_College	0		California_School_of_Professional_Psychology_San_Francisco	0		Chongqing_Medical_University	0
Charles_University_in_Prague	0		Bar-Ilan_University	0		Bulgarian_Academy_of_Sciences	0		Birkbeck_College	0		Academy_of_Medicine_Bialystok	0		Bangalore_University	0		Cayetano_Heredia_University	0		Chicago_Medical_School_Chicago_IL	0		Bocconi_University	0		Aristotle_University_of_Thessaloniki	0		California_School_of_Professional_Psychology_San_Francisco	0		Birla_Institute_of_Technology_and_Science	0		Belorussian_State_Medical_University	0		California_School_of_Professional_Psychology_San_Diego	0		Bose_Institute_Calcutta	0		California_State_University_Channel_Islands	0		Chongqing_University	0
Chatham_University	0		Barkatullah_University_Bhopal_India	0		Buryate_State_Agricultural_Academy	0		Birla_Institute_of_Technology_and_Science	0		Academy_of_Medicine_Poland	0		Bangor_University	0		Ceara_State_University	0		Chicago_School_of_Professional_Psychology_Chicago_Campus	0		Bogazici_University	0		Arkansas_State	0		California_State_University_Channel_Islands	0		Bloodcenter_of_Wisconsin_Inc	0		Ben-Gurion_University_of_the_Negev	0		California_School_of_Professional_Psychology_San_Francisco	0		Boston_College	0		Campbell_University	0		Chonnam_National_University	0
Chaudhary_Charan_Singh_University	0		Barry	0		Butler_University	0		BJ_Medical_College	0		Academy_of_Military_Medical_Sciences	0		Bar-Ilan_University	0		Cedars-Sinai_Medical_Center	0		Chicago_School_of_Professional_Psychology_LA_Campus	0		Bogomolets_National_Medical_University	0		Arkhangelsk_Medical_Institute	0		Campbell_University	0		Bocconi_University	0		Benedictine	0		California_State_University_Channel_Islands	0		Bournemouth_University_United_Kingdom	0		Capella_University	0		Christian_Medical_College	0
Chemnitz_University_of_Technology	0		Bashkir_State_University	0		Cairo_University	0		Bloodcenter_of_Wisconsin_Inc	0		Academy_of_Science_Berlin	0		Barkatullah_University_Bhopal_India	0		Center_for_Molecular_Neurobiology_Hamburg	0		China_Agricultural_University	0		Boise_State	0		Armed_Forces_Medical_College	0		Capella_University	0		Bogazici_University	0		Bengbu_Medical_College	0		Campbell_University	0		Bowling_Green_State	0		Capital_University	0		Christian-Albrechts_University_at_Kiel	0
Chestnut_Hill_College	0		Baylor	0		Calcutta_National_Medical_College	0		Bocconi_University	0		Academy_of_Science_Minsk	0		Barry	0		Center_For_Research_And_Advanced_Studies	0		China_Medical_University	0		Bolan_Medical_College	0		Armenian_National_Academy_of_Sciences	0		Capital_University	0		Bogomolets_National_Medical_University	0		Benha_University	0		Capella_University	0		Brescia_University	0		Cappella_University	0		Christie_Hospital_Manchester	0
Chiang_Mai_University	0		Beatson_Institute_for_Cancer_Research_Glasgow_United_Kingdom	0		Calicut_Medical_College	0		Bogazici_University	0		Academy_of_Sciences_Budapest	0		Bashkir_State_University	0		Central_Drug_Research_Institute	0		China_Pharmaceutical_University_Nanjing	0		Bose_Institute_Calcutta	0		Arndt_University	0		Cappella_University	0		Bogomoletz_Institute_of_Physiology	0		Bernard_University	0		Capital_University	0		Brigham_Young	0		Cardiff_University	0		Chung-Ang_University	0
Chiba_University	0		Beihang_University	0		California_Coast_University	0		Bogomolets_National_Medical_University	0		Academy_of_Sciences_Hungary	0		Baylor	0		Central_Food_Technological_Research_Institute	0		China-National_University_of_Singapore	0		Boston_College	0		Ashland_University	0		Cardiff_University	0		Boise_State	0		Bharathidasan_University	0		Cappella_University	0		Brock_University	0		Cardinal_Stritch	0		Chungnam_National_University	0
Chicago_College_of_Osteopathic_Medicine	0		Beijing_Capital_Medical_University	0		California_Institute_of_Integral_Studies	0		Bogomoletz_Institute_of_Physiology	0		Academy_of_Sciences_of_Ukraine	0		Beatson_Institute_for_Cancer_Research_Glasgow_United_Kingdom	0		Central_Institute_of_Physical_Culture_Russia	0		Chinese_Academy_of_Medical_Sciences	0		Bournemouth_University_United_Kingdom	0		Aston_University	0		Cardinal_Stritch	0		Bolan_Medical_College	0		BHU_Institute_of_Technology	0		Cardiff_University	0		Brooklyn_College_(CUNY)	0		Carleton_University	0		Cinvestav	0
Chicago_Medical_School_Chicago_IL	0		Beijing_Institute_for_Biotechnology	0		California_Polytechnic_State_University_San_Luis_Obispo	0		Boise_State	0		Academy_of_Sciences_Poland	0		Beihang_University	0		Central_Michigan	0		Chinese_Academy_of_Preventative_Medicine	0		Brescia_University	0		Autonomous_National_University_of_Honduras	0		Carleton_University	0		Bose_Institute_Calcutta	0		Bielefeld_University	0		Cardinal_Stritch	0		Brooklyn_Law_School	0		Carlos_Albizu_University	0		City_College_(CUNY)	0
Chicago_School_of_Professional_Psychology_Chicago_Campus	0		Beijing_Institute_of_Pharmacology	0		California_School_of_Professional_Psychology_Alameda	0		Bolan_Medical_College	0		Academy_of_Sciences_Prague	0		Beijing_Capital_Medical_University	0		Central_Queensland_University	0		Chinese_Academy_of_Sciences	0		Brigham_Young	0		Autonomous_University_of_Barcelona	0		Carlos_Albizu_University	0		Bournemouth_University_United_Kingdom	0		Bilkent_University	0		Carleton_University	0		Brown	0		Carlow_University	0		City_of_Hope_Graduate_School	0
Chicago_School_of_Professional_Psychology_LA_Campus	0		Beijing_Institute_of_Pharmacology_and_Toxicology	0		California_School_of_Professional_Psychology_Berkeley	0		Bose_Institute_Calcutta	0		Academy_Of_Sciences_Slovakia	0		Beijing_Institute_for_Biotechnology	0		Central_South_University	0		Chinese_Center_for_Disease_Control_and_Prevention	0		Brock_University	0		Autonomous_University_of_Madrid	0		Carlow_University	0		Bowling_Green_State	0		Biola	0		Carlos_Albizu_University	0		Brunel_University	0		Carnegie_Institute_of_Technology	0		City_of_Hope_National_Medical_Center	0
China_Agricultural_University	0		Beijing_Medical_University	0		California_School_of_Professional_Psychology_Fresno	0		Boston_College	0		Adam_Mickiewicz_University	0		Beijing_Institute_of_Pharmacology	0		Central_University_of_Ecuador	0		Chinese_University_of_Hong_Kong	0		Brooklyn_College_(CUNY)	0		Azabu_University	0		Carnegie_Institute_of_Technology	0		Brandeis	0		Biozentrum_Wuerzburg	0		Carlow_University	0		Bryn_Mawr	0		Carol_Davila_University_of_Medicine	0		City_of_London_Polytechnic	0
China_Medical_University	0		Beijing_Normal_University	0		California_School_of_Professional_Psychology_Los_Angeles	0		Bournemouth_University_United_Kingdom	0		Addis_Ababa_University	0		Beijing_Institute_of_Pharmacology_and_Toxicology	0		Central_University_of_Venezuela	0		Chittaranjan_National_Cancer_Institute	0		Brooklyn_Law_School	0		Azerbaijan_National_Academy_of_Sciences	0		Carol_Davila_University_of_Medicine	0		Brescia_University	0		Birkbeck_College	0		Carnegie_Institute_of_Technology	0		Bulgarian_Academy_of_Sciences	0		Catholic_University_Eichstätt-Ingolstadt	0		City_University_of_Hong_Kong	0
China_Pharmaceutical_University_Nanjing	0		Bejing_Institute_of_Radiation_Medicine	0		California_School_of_Professional_Psychology_San_Diego	0		Bowling_Green_State	0		Aga_Khan_University	0		Beijing_Normal_University	0		Centre_for_Cellular_&_Molecular_Biology	0		Chongqing_Medical_University	0		Brunel_University	0		Azusa_Pacific	0		Catholic_University_Eichstätt-Ingolstadt	0		Brigham_Young	0		Birla_Institute_of_Technology_and_Science	0		Carol_Davila_University_of_Medicine	0		Buryate_State_Agricultural_Academy	0		Catholic_University_of_America	0		Claremont_Graduate	0
China-National_University_of_Singapore	0		Belarusian_State_Medical_University	0		California_School_of_Professional_Psychology_San_Francisco	0		Brescia_University	0		Agence_Nationale_de_Securite	0		Bejing_Institute_of_Radiation_Medicine	0		Centro_de_Investigaciones	0		Chongqing_University	0		Bryn_Mawr	0		Baba_Raghav_Das_Medical_College	0		Catholic_University_of_Leuven	0		Brock_University	0		BJ_Medical_College	0		Catholic_University_Eichstätt-Ingolstadt	0		Butler_University	0		Catholic_University_of_Leuven	0		Clark	0
Chinese_Academy_of_Medical_Sciences	0		Belarusian_State_University	0		California_State_University_Channel_Islands	0		Brigham_Young	0		Agra_University	0		Belarusian_State_Medical_University	0		Centro_Eleia_Actividades_Psicologicas	0		Chonnam_National_University	0		Bulgarian_Academy_of_Sciences	0		Babasaheb_Bhimrao_Ambedkar_University	0		Catholic_University_of_Milan	0		Brooklyn_College_(CUNY)	0		Bloodcenter_of_Wisconsin_Inc	0		Catholic_University_of_America	0		Calcutta_National_Medical_College	0		Catholic_University_of_Milan	0		Clark_Atlanta	0
Chinese_Academy_of_Preventative_Medicine	0		Bellarmine_University	0		Campbell_University	0		Brock_University	0		Agrophysical_Research_Institute	0		Belarusian_State_University	0		Chalmers_University_of_Technology	0		Christian_Medical_College	0		Buryate_State_Agricultural_Academy	0		Babes-Bolyai_University	0		Catholic_University_of_Rome	0		Brooklyn_Law_School	0		Bocconi_University	0		Catholic_University_of_Leuven	0		Calicut_Medical_College	0		Catholic_University_of_Rome	0		Clarkson	0
Chinese_Academy_of_Sciences	0		Belmont_University	0		Capella_University	0		Brooklyn_College_(CUNY)	0		Ahmadu_Bello_University	0		Bellarmine_University	0		Chamberlain_University-Illinois	0		Christian-Albrechts_University_at_Kiel	0		Butler_University	0		Bach_Institute_of_Biochemistry_Moscow	0		Catholic_University_of_the_Sacred_Heart_Rome	0		Bryn_Mawr	0		Bogazici_University	0		Catholic_University_of_Milan	0		California_Coast_University	0		Catholic_University_of_the_Sacred_Heart_Rome	0		Clarkson_College	0
Chinese_Center_for_Disease_Control_and_Prevention	0		Belorussian_State_Medical_University	0		Capital_University	0		Brooklyn_Law_School	0		Ain_Shams_University	0		Belmont_University	0		Changchun_University	0		Christie_Hospital_Manchester	0		Cairo_University	0		Ball_State	0		Catholic_University_School_of_Medicine_Rome	0		Bulgarian_Academy_of_Sciences	0		Bogomolets_National_Medical_University	0		Catholic_University_of_Rome	0		California_Institute_of_Integral_Studies	0		Catholic_University_School_of_Medicine_Rome	0		Claude-Bernard_University	0
Chinese_University_of_Hong_Kong	0		Ben-Gurion_University_of_the_Negev	0		Cappella_University	0		Brunel_University	0		Aix-Marseille_University	0		Belorussian_State_Medical_University	0		Chapman_University	0		Chung-Ang_University	0		Calcutta_National_Medical_College	0		Banaras_Hindu_University	0		Catholic_University_Silva_Henriquez	0		Buryate_State_Agricultural_Academy	0		Bogomoletz_Institute_of_Physiology	0		Catholic_University_of_the_Sacred_Heart_Rome	0		California_Polytechnic_State_University_San_Luis_Obispo	0		Catholic_University_Silva_Henriquez	0		Clemson	0
Chittaranjan_National_Cancer_Institute	0		Benedictine	0		Cardiff_University	0		Bryn_Mawr	0		Akita_University	0		Ben-Gurion_University_of_the_Negev	0		Charing_Cross_and_Westminster_Medical_Schools	0		Chungnam_National_University	0		Calicut_Medical_College	0		Bangalore_Medical_College	0		Cayetano_Heredia_University	0		Butler_University	0		Boise_State	0		Catholic_University_School_of_Medicine_Rome	0		California_School_of_Professional_Psychology_Alameda	0		Cayetano_Heredia_University	0		Cleveland_Clinic	0
Chongqing_Medical_University	0		Bengbu_Medical_College	0		Cardinal_Stritch	0		Bulgarian_Academy_of_Sciences	0		Alabama_A&M	0		Benedictine	0		Charite_University_Medicine	0		Cinvestav	0		California_Coast_University	0		Bangalore_University	0		Ceara_State_University	0		Cairo_University	0		Bolan_Medical_College	0		Catholic_University_Silva_Henriquez	0		California_School_of_Professional_Psychology_Berkeley	0		Ceara_State_University	0		Cleveland_State	0
Chongqing_University	0		Benha_University	0		Carleton_University	0		Buryate_State_Agricultural_Academy	0		Alabama_State	0		Bengbu_Medical_College	0		Chatham_University	0		City_College_(CUNY)	0		California_Institute_of_Integral_Studies	0		Bangor_University	0		Cedars-Sinai_Medical_Center	0		Calcutta_National_Medical_College	0		Bose_Institute_Calcutta	0		Cayetano_Heredia_University	0		California_School_of_Professional_Psychology_Fresno	0		Cedars-Sinai_Medical_Center	0		Cleveland-Marshall_College_of_Law	0
Chonnam_National_University	0		Bernard_University	0		Carlos_Albizu_University	0		Butler_University	0		Albany_College_of_Pharmacy_and_Health_Sciences	0		Benha_University	0		Chaudhary_Charan_Singh_University	0		City_of_Hope_Graduate_School	0		California_Polytechnic_State_University_San_Luis_Obispo	0		Bar-Ilan_University	0		Center_for_Molecular_Neurobiology_Hamburg	0		Calicut_Medical_College	0		Bournemouth_University_United_Kingdom	0		Ceara_State_University	0		California_School_of_Professional_Psychology_Los_Angeles	0		Center_for_Molecular_Neurobiology_Hamburg	0		CNRS_Gif-sur-Yvette	0
Christian_Medical_College	0		Bharathidasan_University	0		Carlow_University	0		Cairo_University	0		Albert_Einstein_College_of_Medicine	0		Bernard_University	0		Chemnitz_University_of_Technology	0		City_of_Hope_National_Medical_Center	0		California_School_of_Professional_Psychology_Alameda	0		Barkatullah_University_Bhopal_India	0		Center_For_Research_And_Advanced_Studies	0		California_Coast_University	0		Bowling_Green_State	0		Cedars-Sinai_Medical_Center	0		California_School_of_Professional_Psychology_San_Francisco	0		Center_For_Research_And_Advanced_Studies	0		Cochin_University_of_Science_and_Technology_in_india	0
Christian-Albrechts_University_at_Kiel	0		BHU_Institute_of_Technology	0		Carnegie_Institute_of_Technology	0		Calcutta_National_Medical_College	0		Albert_Szent-Gyorgyi_Medical_University	0		Bharathidasan_University	0		Chestnut_Hill_College	0		City_of_London_Polytechnic	0		California_School_of_Professional_Psychology_Berkeley	0		Barry	0		Central_Drug_Research_Institute	0		California_Institute_of_Integral_Studies	0		Brescia_University	0		Center_for_Molecular_Neurobiology_Hamburg	0		California_State_University_Channel_Islands	0		Central_Drug_Research_Institute	0		Cold_Spring_Harbor	0
Christie_Hospital_Manchester	0		Bielefeld_University	0		Carol_Davila_University_of_Medicine	0		Calicut_Medical_College	0		Albertus_Magnus_College	0		BHU_Institute_of_Technology	0		Chiang_Mai_University	0		City_University_of_Hong_Kong	0		California_School_of_Professional_Psychology_Fresno	0		Bashkir_State_University	0		Central_Food_Technological_Research_Institute	0		California_Polytechnic_State_University_San_Luis_Obispo	0		Brigham_Young	0		Center_For_Research_And_Advanced_Studies	0		Campbell_University	0		Central_Food_Technological_Research_Institute	0		College_de_France	0
Chung-Ang_University	0		Bilkent_University	0		Catholic_University_Eichstätt-Ingolstadt	0		California_Coast_University	0		Alexandria_University	0		Bielefeld_University	0		Chiba_University	0		City_University_of_New_York_The	0		California_School_of_Professional_Psychology_Los_Angeles	0		Baylor	0		Central_Institute_of_Physical_Culture_Russia	0		California_School_of_Professional_Psychology_Alameda	0		Brock_University	0		Central_Drug_Research_Institute	0		Capella_University	0		Central_Institute_of_Physical_Culture_Russia	0		College_of_Physicians_and_Surgeons_of_Ontario	0
Chungnam_National_University	0		Biola	0		Catholic_University_of_Leuven	0		California_Institute_of_Integral_Studies	0		Alfred	0		Bilkent_University	0		Chicago_College_of_Osteopathic_Medicine	0		Claremont_Graduate	0		California_School_of_Professional_Psychology_San_Diego	0		Beatson_Institute_for_Cancer_Research_Glasgow_United_Kingdom	0		Central_Michigan	0		California_School_of_Professional_Psychology_Berkeley	0		Brooklyn_College_(CUNY)	0		Central_Food_Technological_Research_Institute	0		Capital_University	0		Central_Michigan	0		College_of_Saint_Mary	0
Cinvestav	0		Biozentrum_Wuerzburg	0		Catholic_University_of_Milan	0		California_Polytechnic_State_University_San_Luis_Obispo	0		Aligarh_Muslim_University	0		Biola	0		Chicago_Medical_School_Chicago_IL	0		Clark	0		California_School_of_Professional_Psychology_San_Francisco	0		Beihang_University	0		Central_Queensland_University	0		California_School_of_Professional_Psychology_Fresno	0		Brooklyn_Law_School	0		Central_Institute_of_Physical_Culture_Russia	0		Cappella_University	0		Central_Queensland_University	0		College_of_Saint_Scholastica	0
City_College_(CUNY)	0		Birkbeck_College	0		Catholic_University_of_Rome	0		California_School_of_Professional_Psychology_Alameda	0		All-Union_Cancer_Research_Center	0		Biozentrum_Wuerzburg	0		Chicago_School_of_Professional_Psychology_Chicago_Campus	0		Clark_Atlanta	0		California_State_University_Channel_Islands	0		Beijing_Capital_Medical_University	0		Central_South_University	0		California_School_of_Professional_Psychology_Los_Angeles	0		Brunel_University	0		Central_Michigan	0		Cardinal_Stritch	0		Central_South_University	0		Colombian_School_of_Odontology	0
City_of_Hope_Graduate_School	0		Birla_Institute_of_Technology_and_Science	0		Catholic_University_of_the_Sacred_Heart_Rome	0		California_School_of_Professional_Psychology_Berkeley	0		Allegheny_University_of_the_Health_Sciences	0		Birkbeck_College	0		Chicago_School_of_Professional_Psychology_LA_Campus	0		Clarkson	0		Campbell_University	0		Beijing_Institute_for_Biotechnology	0		Central_University_of_Ecuador	0		California_School_of_Professional_Psychology_San_Diego	0		Bryn_Mawr	0		Central_Queensland_University	0		Carleton_University	0		Central_University_of_Ecuador	0		Colorado_College	0
City_of_Hope_National_Medical_Center	0		BJ_Medical_College	0		Catholic_University_School_of_Medicine_Rome	0		California_School_of_Professional_Psychology_Fresno	0		Alliant_International	0		Birla_Institute_of_Technology_and_Science	0		China_Medical_University	0		Clarkson_College	0		Capella_University	0		Beijing_Institute_of_Pharmacology	0		Central_University_of_Venezuela	0		California_School_of_Professional_Psychology_San_Francisco	0		Bulgarian_Academy_of_Sciences	0		Central_South_University	0		Carlos_Albizu_University	0		Central_University_of_Venezuela	0		Colorado_School_of_Mines	0
City_of_London_Polytechnic	0		Bloodcenter_of_Wisconsin_Inc	0		Ceara_State_University	0		California_School_of_Professional_Psychology_Los_Angeles	0		American	0		BJ_Medical_College	0		China_Pharmaceutical_University_Nanjing	0		Claude-Bernard_University	0		Capital_University	0		Beijing_Institute_of_Pharmacology_and_Toxicology	0		Centre_for_Cellular_&_Molecular_Biology	0		California_State_University_Channel_Islands	0		Buryate_State_Agricultural_Academy	0		Central_University_of_Ecuador	0		Carlow_University	0		Centre_for_Cellular_&_Molecular_Biology	0		Colorado_State	0
City_University_of_Hong_Kong	0		Bogazici_University	0		Cedars-Sinai_Medical_Center	0		California_School_of_Professional_Psychology_San_Diego	0		American_College_of_Veterinary	0		Bloodcenter_of_Wisconsin_Inc	0		China-National_University_of_Singapore	0		Clemson	0		Cappella_University	0		Beijing_Medical_University	0		Centro_de_Investigaciones	0		Campbell_University	0		Butler_University	0		Central_University_of_Venezuela	0		Carnegie_Institute_of_Technology	0		Centro_Eleia_Actividades_Psicologicas	0		Colorado_Technical_University	0
Claremont_Graduate	0		Bogomolets_National_Medical_University	0		Center_for_Molecular_Neurobiology_Hamburg	0		California_School_of_Professional_Psychology_San_Francisco	0		American_College_of_Veterinary_Anesthesiologists	0		Bocconi_University	0		Chinese_Academy_of_Medical_Sciences	0		Cleveland_Clinic	0		Cardiff_University	0		Beijing_Normal_University	0		Centro_Eleia_Actividades_Psicologicas	0		Capella_University	0		Cairo_University	0		Centre_for_Cellular_&_Molecular_Biology	0		Carnegie_Mellon	0		Chalmers_University_of_Technology	0		Columbia_Pacific_University	0
Clark	0		Bogomoletz_Institute_of_Physiology	0		Center_For_Research_And_Advanced_Studies	0		California_State_University_Channel_Islands	0		American_College_of_Veterinary_Clinical_Pharmacology	0		Bogazici_University	0		Chinese_Academy_of_Preventative_Medicine	0		Cleveland_State	0		Cardinal_Stritch	0		Bejing_Institute_of_Radiation_Medicine	0		Chalmers_University_of_Technology	0		Capital_University	0		Calcutta_National_Medical_College	0		Centro_de_Investigaciones	0		Carol_Davila_University_of_Medicine	0		Chamberlain_University-Illinois	0		Columbia_Theological_Seminary	0
Clark_Atlanta	0		Boise_State	0		Central_Drug_Research_Institute	0		Campbell_University	0		American_College_of_Veterinary_Internal_Medicine	0		Bogomolets_National_Medical_University	0		Chinese_Academy_of_Sciences	0		Cleveland-Marshall_College_of_Law	0		Carleton_University	0		Belarusian_State_Medical_University	0		Chamberlain_University-Illinois	0		Cappella_University	0		Calicut_Medical_College	0		Centro_Eleia_Actividades_Psicologicas	0		Catholic_University_Eichstätt-Ingolstadt	0		Changchun_University	0		Columbia_University_Medical_Center	0
Clarkson	0		Bolan_Medical_College	0		Central_Food_Technological_Research_Institute	0		Capella_University	0		American_College_of_Veterinary_Pathologists	0		Bogomoletz_Institute_of_Physiology	0		Chinese_Center_for_Disease_Control_and_Prevention	0		CNRS_Gif-sur-Yvette	0		Carlos_Albizu_University	0		Belarusian_State_University	0		Changchun_University	0		Cardiff_University	0		California_Coast_University	0		Chalmers_University_of_Technology	0		Catholic_University_of_America	0		Chapman_University	0		Comenius_University	0
Clarkson_College	0		Bose_Institute_Calcutta	0		Central_Institute_of_Physical_Culture_Russia	0		Capital_University	0		American_College_of_Veterinary_Surgeons	0		Boise_State	0		Chinese_University_of_Hong_Kong	0		Cochin_University_of_Science_and_Technology_in_india	0		Carlow_University	0		Bellarmine_University	0		Chapman_University	0		Cardinal_Stritch	0		California_Institute_of_Integral_Studies	0		Chamberlain_University-Illinois	0		Catholic_University_of_Leuven	0		Charing_Cross_and_Westminster_Medical_Schools	0		Concordia_University-Chicago	0
Claude-Bernard_University	0		Bournemouth_University_United_Kingdom	0		Central_Michigan	0		Cappella_University	0		American_College_of_Zoological_Medicine	0		Bolan_Medical_College	0		Chittaranjan_National_Cancer_Institute	0		College_de_France	0		Carnegie_Institute_of_Technology	0		Belmont_University	0		Charing_Cross_and_Westminster_Medical_Schools	0		Carleton_University	0		California_Polytechnic_State_University_San_Luis_Obispo	0		Changchun_University	0		Catholic_University_of_Milan	0		Charles_University_in_Prague	0		Corvinus_University_of_Budapest	0
Clemson	0		Bowling_Green_State	0		Central_Queensland_University	0		Cardiff_University	0		American_School_of_Professional_Psychology_Honolulu_Hawaii	0		Bose_Institute_Calcutta	0		Chongqing_Medical_University	0		College_of_Physicians_and_Surgeons_of_Ontario	0		Carol_Davila_University_of_Medicine	0		Belorussian_State_Medical_University	0		Charite_University_Medicine	0		Carlos_Albizu_University	0		California_School_of_Professional_Psychology_Alameda	0		Chapman_University	0		Catholic_University_of_Rome	0		Chatham_University	0		Council_of_Scientific_and_Industrial_Research	0
Cleveland_Clinic	0		Brescia_University	0		Central_South_University	0		Cardinal_Stritch	0		American_Sentinel_University_Denver_Colorado	0		Boston_College	0		Chongqing_University	0		College_of_Saint_Mary	0		Catholic_University_Eichstätt-Ingolstadt	0		Ben-Gurion_University_of_the_Negev	0		Charles_University_in_Prague	0		Carlow_University	0		California_School_of_Professional_Psychology_Berkeley	0		Charing_Cross_and_Westminster_Medical_Schools	0		Catholic_University_of_the_Sacred_Heart_Rome	0		Chaudhary_Charan_Singh_University	0		Courant_Institute_of_Mathematical_Sciences	0
Cleveland_State	0		Brigham_Young	0		Central_University_of_Ecuador	0		Carleton_University	0		American_University_of_Antigua	0		Bournemouth_University_United_Kingdom	0		Chonnam_National_University	0		College_of_Saint_Scholastica	0		Catholic_University_of_America	0		Benedictine	0		Chatham_University	0		Carnegie_Institute_of_Technology	0		California_School_of_Professional_Psychology_Fresno	0		Charite_University_Medicine	0		Catholic_University_School_of_Medicine_Rome	0		Chemnitz_University_of_Technology	0		Coventry_University	0
Cleveland-Marshall_College_of_Law	0		Brock_University	0		Central_University_of_Venezuela	0		Carlos_Albizu_University	0		American_University_Of_Caribbean	0		Bowling_Green_State	0		Christian_Medical_College	0		Colombian_School_of_Odontology	0		Catholic_University_of_Leuven	0		Bengbu_Medical_College	0		Chaudhary_Charan_Singh_University	0		Carnegie_Mellon	0		California_School_of_Professional_Psychology_Los_Angeles	0		Charles_University_in_Prague	0		Catholic_University_Silva_Henriquez	0		Chestnut_Hill_College	0		Cracow_University	0
CNRS_Gif-sur-Yvette	0		Brooklyn_College_(CUNY)	0		Centre_for_Cellular_&_Molecular_Biology	0		Carlow_University	0		American_University_of_the_Caribbean_Miami	0		Brescia_University	0		Christian-Albrechts_University_at_Kiel	0		Colorado_College	0		Catholic_University_of_Milan	0		Benha_University	0		Chemnitz_University_of_Technology	0		Carol_Davila_University_of_Medicine	0		California_School_of_Professional_Psychology_San_Diego	0		Chatham_University	0		Cayetano_Heredia_University	0		Chiang_Mai_University	0		Creighton	0
Cochin_University_of_Science_and_Technology_in_india	0		Brooklyn_Law_School	0		Centro_de_Investigaciones	0		Carnegie_Institute_of_Technology	0		Andhra_University	0		Brigham_Young	0		Christie_Hospital_Manchester	0		Colorado_School_of_Mines	0		Catholic_University_of_Rome	0		Bernard_University	0		Chestnut_Hill_College	0		Catholic_University_Eichstätt-Ingolstadt	0		California_School_of_Professional_Psychology_San_Francisco	0		Chaudhary_Charan_Singh_University	0		Ceara_State_University	0		Chiba_University	0		CU_Boulder	0
Cold_Spring_Harbor	0		Brunel_University	0		Centro_Eleia_Actividades_Psicologicas	0		Carol_Davila_University_of_Medicine	0		Andrews	0		Brock_University	0		Chung-Ang_University	0		Colorado_Technical_University	0		Catholic_University_of_the_Sacred_Heart_Rome	0		Bharathidasan_University	0		Chiang_Mai_University	0		Catholic_University_of_Leuven	0		California_State_University_Channel_Islands	0		Chemnitz_University_of_Technology	0		Cedars-Sinai_Medical_Center	0		Chicago_College_of_Osteopathic_Medicine	0		CU_Denver	0
College_de_France	0		Bryn_Mawr	0		Chalmers_University_of_Technology	0		Catholic_University_Eichstätt-Ingolstadt	0		Anna_University_Chennai	0		Brooklyn_College_(CUNY)	0		Chungnam_National_University	0		Columbia_Pacific_University	0		Catholic_University_School_of_Medicine_Rome	0		BHU_Institute_of_Technology	0		Chiba_University	0		Catholic_University_of_Milan	0		Caltech	0		Chestnut_Hill_College	0		Center_for_Molecular_Neurobiology_Hamburg	0		Chicago_Medical_School_Chicago_IL	0		Cukurova_University	0
College_of_Physicians_and_Surgeons_of_Ontario	0		Bulgarian_Academy_of_Sciences	0		Chamberlain_University-Illinois	0		Catholic_University_of_America	0		Annaba_Medical_School_of_Algeria	0		Brunel_University	0		Cinvestav	0		Columbia_Theological_Seminary	0		Catholic_University_Silva_Henriquez	0		Bielefeld_University	0		Chicago_College_of_Osteopathic_Medicine	0		Catholic_University_of_Rome	0		Campbell_University	0		Chiang_Mai_University	0		Center_For_Research_And_Advanced_Studies	0		Chicago_School_of_Professional_Psychology_Chicago_Campus	0		Curie_Institute_Paris	0
College_of_Saint_Mary	0		Buryate_State_Agricultural_Academy	0		Changchun_University	0		Catholic_University_of_Leuven	0		Annamalai_University	0		Bryn_Mawr	0		City_College_(CUNY)	0		Columbia_University_Medical_Center	0		Cayetano_Heredia_University	0		Biola	0		Chicago_Medical_School_Chicago_IL	0		Catholic_University_of_the_Sacred_Heart_Rome	0		Capella_University	0		Chicago_College_of_Osteopathic_Medicine	0		Central_Drug_Research_Institute	0		Chicago_School_of_Professional_Psychology_LA_Campus	0		Curtin_University	0
College_of_Saint_Scholastica	0		Butler_University	0		Chapman_University	0		Catholic_University_of_Milan	0		Antioch_School_of_Law	0		Buryate_State_Agricultural_Academy	0		City_of_Hope_Graduate_School	0		Comenius_University	0		Ceara_State_University	0		Biozentrum_Wuerzburg	0		Chicago_School_of_Professional_Psychology_Chicago_Campus	0		Catholic_University_School_of_Medicine_Rome	0		Capital_University	0		Chicago_Medical_School_Chicago_IL	0		Central_Food_Technological_Research_Institute	0		China_Agricultural_University	0		Czechoslovak_Academy_of_Sciences	0
Colombian_School_of_Odontology	0		Calcutta_National_Medical_College	0		Charing_Cross_and_Westminster_Medical_Schools	0		Catholic_University_of_Rome	0		Appalachian_College_of_Pharmacy	0		Butler_University	0		City_of_Hope_National_Medical_Center	0		Concordia_University-Chicago	0		Cedars-Sinai_Medical_Center	0		Birkbeck_College	0		Chicago_School_of_Professional_Psychology_LA_Campus	0		Catholic_University_Silva_Henriquez	0		Cappella_University	0		Chicago_School_of_Professional_Psychology_Chicago_Campus	0		Central_Institute_of_Physical_Culture_Russia	0		China_Medical_University	0		Daemen_College	0
Colorado_College	0		Calicut_Medical_College	0		Charite_University_Medicine	0		Catholic_University_of_the_Sacred_Heart_Rome	0		Arabian_Gulf_University	0		Cairo_University	0		City_of_London_Polytechnic	0		Corvinus_University_of_Budapest	0		Center_for_Molecular_Neurobiology_Hamburg	0		Birla_Institute_of_Technology_and_Science	0		China_Agricultural_University	0		Cayetano_Heredia_University	0		Cardiff_University	0		Chicago_School_of_Professional_Psychology_LA_Campus	0		Central_Michigan	0		China_Pharmaceutical_University_Nanjing	0		Dagestan_Medical_Academy	0
Colorado_School_of_Mines	0		California_Coast_University	0		Charles_University_in_Prague	0		Catholic_University_School_of_Medicine_Rome	0		ARC_Poultry_Research_Center	0		Calcutta_National_Medical_College	0		City_University_of_Hong_Kong	0		Council_of_Scientific_and_Industrial_Research	0		Center_For_Research_And_Advanced_Studies	0		BJ_Medical_College	0		China_Medical_University	0		Ceara_State_University	0		Cardinal_Stritch	0		China_Agricultural_University	0		Central_Queensland_University	0		China-National_University_of_Singapore	0		Dalhousie_University	0
Colorado_State	0		California_Institute_of_Integral_Studies	0		Chatham_University	0		Catholic_University_Silva_Henriquez	0		Arcadia_University	0		Calicut_Medical_College	0		City_University_of_New_York_The	0		Courant_Institute_of_Mathematical_Sciences	0		Central_Drug_Research_Institute	0		Bloodcenter_of_Wisconsin_Inc	0		China_Pharmaceutical_University_Nanjing	0		Cedars-Sinai_Medical_Center	0		Carleton_University	0		China_Medical_University	0		Central_South_University	0		Chinese_Academy_of_Medical_Sciences	0		Dalian_Institute_of_Chemical_Physics	0
Colorado_Technical_University	0		California_Polytechnic_State_University_San_Luis_Obispo	0		Chaudhary_Charan_Singh_University	0		Cayetano_Heredia_University	0		Argosy_University_Atlanta	0		California_Coast_University	0		Clark	0		Coventry_University	0		Central_Food_Technological_Research_Institute	0		Bocconi_University	0		China-National_University_of_Singapore	0		Center_for_Molecular_Neurobiology_Hamburg	0		Carlos_Albizu_University	0		China_Pharmaceutical_University_Nanjing	0		Central_University_of_Ecuador	0		Chinese_Academy_of_Preventative_Medicine	0		Dalian_Medical_University	0
Columbia_Pacific_University	0		California_School_of_Professional_Psychology_Alameda	0		Chemnitz_University_of_Technology	0		Ceara_State_University	0		Argosy_University_Sarasota	0		California_Institute_of_Integral_Studies	0		Clark_Atlanta	0		Cracow_University	0		Central_Institute_of_Physical_Culture_Russia	0		Bogazici_University	0		Chinese_Academy_of_Preventative_Medicine	0		Center_For_Research_And_Advanced_Studies	0		Carlow_University	0		China-National_University_of_Singapore	0		Central_University_of_Venezuela	0		Chinese_Academy_of_Sciences	0		Dalian_University_of_Technology	0
Columbia_Theological_Seminary	0		California_School_of_Professional_Psychology_Berkeley	0		Chestnut_Hill_College	0		Cedars-Sinai_Medical_Center	0		Argosy_University_Washington_DC	0		California_Polytechnic_State_University_San_Luis_Obispo	0		Clarkson	0		Creighton	0		Central_Michigan	0		Bogomolets_National_Medical_University	0		Chinese_Center_for_Disease_Control_and_Prevention	0		Central_Drug_Research_Institute	0		Carnegie_Institute_of_Technology	0		Chinese_Academy_of_Preventative_Medicine	0		Centre_for_Cellular_&_Molecular_Biology	0		Chinese_Center_for_Disease_Control_and_Prevention	0		Damascus_University	0
Columbia_University_Medical_Center	0		California_School_of_Professional_Psychology_Fresno	0		Chiang_Mai_University	0		Center_for_Molecular_Neurobiology_Hamburg	0		Argosy_University-Twin_Cities	0		California_School_of_Professional_Psychology_Alameda	0		Clarkson_College	0		CU_Denver	0		Central_Queensland_University	0		Bogomoletz_Institute_of_Physiology	0		Chinese_University_of_Hong_Kong	0		Central_Food_Technological_Research_Institute	0		Carol_Davila_University_of_Medicine	0		Chinese_Center_for_Disease_Control_and_Prevention	0		Centro_de_Investigaciones	0		Chinese_University_of_Hong_Kong	0		Dankook_University	0
Comenius_University	0		California_School_of_Professional_Psychology_Los_Angeles	0		Chiba_University	0		Center_For_Research_And_Advanced_Studies	0		Aristotle_University_of_Thessaloniki	0		California_School_of_Professional_Psychology_Berkeley	0		Claude-Bernard_University	0		Cukurova_University	0		Central_South_University	0		Boise_State	0		Chittaranjan_National_Cancer_Institute	0		Central_Institute_of_Physical_Culture_Russia	0		Catholic_University_Eichstätt-Ingolstadt	0		Chinese_University_of_Hong_Kong	0		Centro_Eleia_Actividades_Psicologicas	0		Chittaranjan_National_Cancer_Institute	0		Dartmouth	0
Concordia_University-Chicago	0		California_School_of_Professional_Psychology_San_Diego	0		Chicago_College_of_Osteopathic_Medicine	0		Central_Drug_Research_Institute	0		Arkansas_State	0		California_School_of_Professional_Psychology_Fresno	0		Clemson	0		Curie_Institute_Paris	0		Central_University_of_Ecuador	0		Bolan_Medical_College	0		Chongqing_Medical_University	0		Central_Michigan	0		Catholic_University_of_Leuven	0		Chittaranjan_National_Cancer_Institute	0		Chalmers_University_of_Technology	0		Chongqing_Medical_University	0		Davao_Medical_School	0
Corvinus_University_of_Budapest	0		California_School_of_Professional_Psychology_San_Francisco	0		Chicago_Medical_School_Chicago_IL	0		Central_Food_Technological_Research_Institute	0		Armed_Forces_Medical_College	0		California_School_of_Professional_Psychology_Los_Angeles	0		Cleveland_Clinic	0		Curtin_University	0		Central_University_of_Venezuela	0		Bose_Institute_Calcutta	0		Chongqing_University	0		Central_Queensland_University	0		Catholic_University_of_Milan	0		Chongqing_Medical_University	0		Chamberlain_University-Illinois	0		Chongqing_University	0		Dayanand_Medical_College	0
Council_of_Scientific_and_Industrial_Research	0		California_State_University_Channel_Islands	0		Chicago_School_of_Professional_Psychology_Chicago_Campus	0		Central_Institute_of_Physical_Culture_Russia	0		Armenian_National_Academy_of_Sciences	0		California_School_of_Professional_Psychology_San_Diego	0		Cleveland_State	0		Czechoslovak_Academy_of_Sciences	0		Centre_for_Cellular_&_Molecular_Biology	0		Bournemouth_University_United_Kingdom	0		Chonnam_National_University	0		Central_South_University	0		Catholic_University_of_Rome	0		Chongqing_University	0		Changchun_University	0		Chonnam_National_University	0		De_Montfort_University	0
Courant_Institute_of_Mathematical_Sciences	0		Campbell_University	0		Chicago_School_of_Professional_Psychology_LA_Campus	0		Central_Michigan	0		Arndt_University	0		California_School_of_Professional_Psychology_San_Francisco	0		Cleveland-Marshall_College_of_Law	0		Daemen_College	0		Centro_de_Investigaciones	0		Brandeis	0		Christian_Medical_College	0		Central_University_of_Ecuador	0		Catholic_University_of_the_Sacred_Heart_Rome	0		Chonnam_National_University	0		Chapman_University	0		Christian_Medical_College	0		Deakin_University	0
Coventry_University	0		Capella_University	0		China_Agricultural_University	0		Central_Queensland_University	0		Ashland_University	0		California_State_University_Channel_Islands	0		CNRS_Gif-sur-Yvette	0		Dagestan_Medical_Academy	0		Centro_Eleia_Actividades_Psicologicas	0		Brescia_University	0		Christian-Albrechts_University_at_Kiel	0		Central_University_of_Venezuela	0		Catholic_University_School_of_Medicine_Rome	0		Christian_Medical_College	0		Charing_Cross_and_Westminster_Medical_Schools	0		Christian-Albrechts_University_at_Kiel	0		Defence_Research_and_Development_Establishment	0
Cracow_University	0		Capital_University	0		China_Medical_University	0		Central_South_University	0		Aston_University	0		Campbell_University	0		Cochin_University_of_Science_and_Technology_in_india	0		Dalhousie_University	0		Chalmers_University_of_Technology	0		Brigham_Young	0		Christie_Hospital_Manchester	0		Centre_for_Cellular_&_Molecular_Biology	0		Catholic_University_Silva_Henriquez	0		Christian-Albrechts_University_at_Kiel	0		Charite_University_Medicine	0		Christie_Hospital_Manchester	0		Delta_State_University	0
Creighton	0		Cappella_University	0		China_Pharmaceutical_University_Nanjing	0		Central_University_of_Ecuador	0		Augusta	0		Capella_University	0		Cold_Spring_Harbor	0		Dalian_Institute_of_Chemical_Physics	0		Chamberlain_University-Illinois	0		Brock_University	0		Chung-Ang_University	0		Centro_de_Investigaciones	0		Cayetano_Heredia_University	0		Christie_Hospital_Manchester	0		Charles_University_in_Prague	0		Chung-Ang_University	0		DePaul	0
CU_Denver	0		Cardiff_University	0		China-National_University_of_Singapore	0		Central_University_of_Venezuela	0		Australian_National_University	0		Capital_University	0		College_de_France	0		Dalian_Medical_University	0		Changchun_University	0		Brooklyn_College_(CUNY)	0		Chungnam_National_University	0		Centro_Eleia_Actividades_Psicologicas	0		Ceara_State_University	0		Chung-Ang_University	0		Chatham_University	0		Chungnam_National_University	0		Des_Moines_University	0
Cukurova_University	0		Cardinal_Stritch	0		Chinese_Academy_of_Preventative_Medicine	0		Centre_for_Cellular_&_Molecular_Biology	0		Autonomous_National_University_of_Honduras	0		Cappella_University	0		College_of_Physicians_and_Surgeons_of_Ontario	0		Dalian_University_of_Technology	0		Chapman_University	0		Brooklyn_Law_School	0		Cinvestav	0		Chalmers_University_of_Technology	0		Cedars-Sinai_Medical_Center	0		Chungnam_National_University	0		Chaudhary_Charan_Singh_University	0		Cinvestav	0		Deutsches_Elektronen-Synchrotron	0
Curie_Institute_Paris	0		Carleton_University	0		Chinese_Center_for_Disease_Control_and_Prevention	0		Centro_de_Investigaciones	0		Autonomous_University_of_Barcelona	0		Cardiff_University	0		College_of_Saint_Mary	0		Damascus_University	0		Charing_Cross_and_Westminster_Medical_Schools	0		Brunel_University	0		City_College_(CUNY)	0		Chamberlain_University-Illinois	0		Center_for_Molecular_Neurobiology_Hamburg	0		Cinvestav	0		Chemnitz_University_of_Technology	0		City_College_(CUNY)	0		Devi_Ahilya_University	0
Curtin_University	0		Carlos_Albizu_University	0		Chinese_University_of_Hong_Kong	0		Centro_Eleia_Actividades_Psicologicas	0		Azabu_University	0		Cardinal_Stritch	0		College_of_Saint_Scholastica	0		Dankook_University	0		Charite_University_Medicine	0		Bryn_Mawr	0		City_of_Hope_Graduate_School	0		Changchun_University	0		Center_For_Research_And_Advanced_Studies	0		City_College_(CUNY)	0		Chestnut_Hill_College	0		City_of_Hope_Graduate_School	0		Dibrugarh_University	0
Czechoslovak_Academy_of_Sciences	0		Carlow_University	0		Chittaranjan_National_Cancer_Institute	0		Chalmers_University_of_Technology	0		Azerbaijan_National_Academy_of_Sciences	0		Carleton_University	0		Colombian_School_of_Odontology	0		Dartmouth	0		Charles_University_in_Prague	0		Buryate_State_Agricultural_Academy	0		City_of_Hope_National_Medical_Center	0		Chapman_University	0		Central_Drug_Research_Institute	0		City_of_Hope_Graduate_School	0		Chiang_Mai_University	0		City_of_Hope_National_Medical_Center	0		Dokuz_Eylul_University	0
Daemen_College	0		Carnegie_Institute_of_Technology	0		Chongqing_Medical_University	0		Chamberlain_University-Illinois	0		Azusa_Pacific	0		Carlos_Albizu_University	0		Colorado_College	0		Davao_Medical_School	0		Chatham_University	0		Butler_University	0		City_of_London_Polytechnic	0		Charing_Cross_and_Westminster_Medical_Schools	0		Central_Food_Technological_Research_Institute	0		City_of_Hope_National_Medical_Center	0		Chiba_University	0		City_of_London_Polytechnic	0		Dominion_University_Urban	0
Dagestan_Medical_Academy	0		Catholic_University_Eichstätt-Ingolstadt	0		Chongqing_University	0		Changchun_University	0		Baba_Raghav_Das_Medical_College	0		Carlow_University	0		Colorado_School_of_Mines	0		Dayanand_Medical_College	0		Chaudhary_Charan_Singh_University	0		Cairo_University	0		City_University_of_Hong_Kong	0		Charite_University_Medicine	0		Central_Institute_of_Physical_Culture_Russia	0		City_of_London_Polytechnic	0		Chicago_College_of_Osteopathic_Medicine	0		City_University_of_Hong_Kong	0		Donetsk_National_Technical_University	0
Dalhousie_University	0		Catholic_University_of_America	0		Chonnam_National_University	0		Chapman_University	0		Babasaheb_Bhimrao_Ambedkar_University	0		Carnegie_Institute_of_Technology	0		Colorado_Technical_University	0		De_Montfort_University	0		Chemnitz_University_of_Technology	0		Calcutta_National_Medical_College	0		City_University_of_New_York_The	0		Charles_University_in_Prague	0		Central_Michigan	0		City_University_of_Hong_Kong	0		Chicago_Medical_School_Chicago_IL	0		Claremont_Graduate	0		Dongguk_University	0
Dalian_Institute_of_Chemical_Physics	0		Catholic_University_of_Leuven	0		Christian_Medical_College	0		Charing_Cross_and_Westminster_Medical_Schools	0		Babes-Bolyai_University	0		Carol_Davila_University_of_Medicine	0		Columbia_Pacific_University	0		Deakin_University	0		Chestnut_Hill_College	0		Calicut_Medical_College	0		Claremont_Graduate	0		Chatham_University	0		Central_Queensland_University	0		City_University_of_New_York_The	0		Chicago_School_of_Professional_Psychology_Chicago_Campus	0		Clark	0		Dow_Medical_College	0
Dalian_Medical_University	0		Catholic_University_of_Milan	0		Christian-Albrechts_University_at_Kiel	0		Charite_University_Medicine	0		Bach_Institute_of_Biochemistry_Moscow	0		Catholic_University_Eichstätt-Ingolstadt	0		Columbia_Theological_Seminary	0		Defence_Research_and_Development_Establishment	0		Chiang_Mai_University	0		California_Coast_University	0		Clark	0		Chaudhary_Charan_Singh_University	0		Central_South_University	0		Claremont_Graduate	0		Chicago_School_of_Professional_Psychology_LA_Campus	0		Clark_Atlanta	0		Dowling_College	0
Dalian_University_of_Technology	0		Catholic_University_of_Rome	0		Christie_Hospital_Manchester	0		Charles_University_in_Prague	0		Bangalore_Medical_College	0		Catholic_University_of_Milan	0		Columbia_University_Medical_Center	0		Delft_University_of_Technology	0		Chiba_University	0		California_Institute_of_Integral_Studies	0		Clark_Atlanta	0		Chemnitz_University_of_Technology	0		Central_University_of_Ecuador	0		Clark	0		China_Agricultural_University	0		Clarkson	0		Drake_University	0
Damascus_University	0		Catholic_University_of_the_Sacred_Heart_Rome	0		Chung-Ang_University	0		Chatham_University	0		Bangalore_University	0		Catholic_University_of_Rome	0		Comenius_University	0		Delta_State_University	0		Chicago_College_of_Osteopathic_Medicine	0		California_Polytechnic_State_University_San_Luis_Obispo	0		Clarkson	0		Chestnut_Hill_College	0		Central_University_of_Venezuela	0		Clark_Atlanta	0		China_Medical_University	0		Clarkson_College	0		Drew	0
Dankook_University	0		Catholic_University_School_of_Medicine_Rome	0		Chungnam_National_University	0		Chaudhary_Charan_Singh_University	0		Bangor_University	0		Catholic_University_of_the_Sacred_Heart_Rome	0		Concordia_University-Chicago	0		DePaul	0		Chicago_Medical_School_Chicago_IL	0		California_School_of_Professional_Psychology_Alameda	0		Clarkson_College	0		Chicago_Medical_School_Chicago_IL	0		Centre_for_Cellular_&_Molecular_Biology	0		Clarkson	0		China_Pharmaceutical_University_Nanjing	0		Claude-Bernard_University	0		Drexel	0
Davao_Medical_School	0		Catholic_University_Silva_Henriquez	0		Cinvestav	0		Chemnitz_University_of_Technology	0		Barkatullah_University_Bhopal_India	0		Catholic_University_School_of_Medicine_Rome	0		Corvinus_University_of_Budapest	0		Des_Moines_University	0		Chicago_School_of_Professional_Psychology_Chicago_Campus	0		California_School_of_Professional_Psychology_Berkeley	0		Claude-Bernard_University	0		Chicago_School_of_Professional_Psychology_Chicago_Campus	0		Centro_de_Investigaciones	0		Clarkson_College	0		China-National_University_of_Singapore	0		Clemson	0		Dropsie_College	0
Dayanand_Medical_College	0		Cayetano_Heredia_University	0		City_College_(CUNY)	0		Chestnut_Hill_College	0		Barry	0		Cayetano_Heredia_University	0		Council_of_Scientific_and_Industrial_Research	0		Deutsches_Elektronen-Synchrotron	0		Chicago_School_of_Professional_Psychology_LA_Campus	0		California_School_of_Professional_Psychology_Fresno	0		Clemson	0		Chicago_School_of_Professional_Psychology_LA_Campus	0		Centro_Eleia_Actividades_Psicologicas	0		Claude-Bernard_University	0		Chinese_Academy_of_Medical_Sciences	0		Cleveland_Clinic	0		Dublin_City_University	0
De_Montfort_University	0		Ceara_State_University	0		City_of_Hope_Graduate_School	0		Chiang_Mai_University	0		Bashkir_State_University	0		Ceara_State_University	0		Courant_Institute_of_Mathematical_Sciences	0		Devi_Ahilya_University	0		China_Agricultural_University	0		California_School_of_Professional_Psychology_Los_Angeles	0		Cleveland_Clinic	0		China_Agricultural_University	0		Chalmers_University_of_Technology	0		Clemson	0		Chinese_Academy_of_Preventative_Medicine	0		Cleveland_State	0		Duquesne	0
Deakin_University	0		Cedars-Sinai_Medical_Center	0		City_of_Hope_National_Medical_Center	0		Chiba_University	0		Baylor	0		Cedars-Sinai_Medical_Center	0		Coventry_University	0		Dibrugarh_University	0		China_Medical_University	0		California_School_of_Professional_Psychology_San_Diego	0		Cleveland_State	0		China_Medical_University	0		Chamberlain_University-Illinois	0		Cleveland_Clinic	0		Chinese_Academy_of_Sciences	0		Cleveland-Marshall_College_of_Law	0		Durham_University	0
Defence_Research_and_Development_Establishment	0		Center_for_Molecular_Neurobiology_Hamburg	0		City_of_London_Polytechnic	0		Chicago_College_of_Osteopathic_Medicine	0		Beatson_Institute_for_Cancer_Research_Glasgow_United_Kingdom	0		Center_for_Molecular_Neurobiology_Hamburg	0		Cracow_University	0		Dokuz_Eylul_University	0		China_Pharmaceutical_University_Nanjing	0		California_School_of_Professional_Psychology_San_Francisco	0		Cleveland-Marshall_College_of_Law	0		China_Pharmaceutical_University_Nanjing	0		Changchun_University	0		Cleveland_State	0		Chinese_Center_for_Disease_Control_and_Prevention	0		CNRS_Gif-sur-Yvette	0		East_Carolina	0
Delft_University_of_Technology	0		Center_For_Research_And_Advanced_Studies	0		City_University_of_Hong_Kong	0		Chicago_Medical_School_Chicago_IL	0		Beihang_University	0		Center_For_Research_And_Advanced_Studies	0		Creighton	0		Dominion_University_Urban	0		China-National_University_of_Singapore	0		California_State_University_Channel_Islands	0		CNRS_Gif-sur-Yvette	0		China-National_University_of_Singapore	0		Chapman_University	0		Cleveland-Marshall_College_of_Law	0		Chinese_University_of_Hong_Kong	0		Cochin_University_of_Science_and_Technology_in_india	0		East_China_Normal_University	0
Delta_State_University	0		Central_Drug_Research_Institute	0		Claremont_Graduate	0		Chicago_School_of_Professional_Psychology_Chicago_Campus	0		Beijing_Institute_for_Biotechnology	0		Central_Drug_Research_Institute	0		Cukurova_University	0		Donetsk_National_Technical_University	0		Chinese_Academy_of_Medical_Sciences	0		Capella_University	0		Cochin_University_of_Science_and_Technology_in_india	0		Chinese_Academy_of_Medical_Sciences	0		Charing_Cross_and_Westminster_Medical_Schools	0		CNRS_Gif-sur-Yvette	0		Chittaranjan_National_Cancer_Institute	0		College_de_France	0		East_China_University_of_Science_and_Technology	0
DePaul	0		Central_Food_Technological_Research_Institute	0		Clark	0		Chicago_School_of_Professional_Psychology_LA_Campus	0		Beijing_Institute_of_Pharmacology	0		Central_Food_Technological_Research_Institute	0		Curie_Institute_Paris	0		Dongguk_University	0		Chinese_Academy_of_Preventative_Medicine	0		Capital_University	0		Cold_Spring_Harbor	0		Chinese_Academy_of_Preventative_Medicine	0		Charite_University_Medicine	0		Cochin_University_of_Science_and_Technology_in_india	0		Chongqing_Medical_University	0		College_of_Physicians_and_Surgeons_of_Ontario	0		East_Tennessee_State	0
Des_Moines_University	0		Central_Institute_of_Physical_Culture_Russia	0		Clark_Atlanta	0		China_Agricultural_University	0		Beijing_Institute_of_Pharmacology_and_Toxicology	0		Central_Institute_of_Physical_Culture_Russia	0		Curtin_University	0		Dow_Medical_College	0		Chinese_Academy_of_Sciences	0		Cappella_University	0		College_de_France	0		Chinese_Academy_of_Sciences	0		Charles_University_in_Prague	0		Cold_Spring_Harbor	0		Chongqing_University	0		College_of_Saint_Mary	0		East_Texas_State_University	0
Deutsches_Elektronen-Synchrotron	0		Central_Michigan	0		Clarkson_College	0		China_Medical_University	0		Beijing_Medical_University	0		Central_Michigan	0		Czechoslovak_Academy_of_Sciences	0		Dowling_College	0		Chinese_Center_for_Disease_Control_and_Prevention	0		Cardiff_University	0		College_of_Physicians_and_Surgeons_of_Ontario	0		Chinese_Center_for_Disease_Control_and_Prevention	0		Chatham_University	0		College_de_France	0		Chonnam_National_University	0		College_of_Saint_Scholastica	0		Eastern_Michigan	0
Devi_Ahilya_University	0		Central_Queensland_University	0		Claude-Bernard_University	0		China-National_University_of_Singapore	0		Beijing_Normal_University	0		Central_Queensland_University	0		Daemen_College	0		Drake_University	0		Chinese_University_of_Hong_Kong	0		Cardinal_Stritch	0		College_of_Saint_Mary	0		Chinese_University_of_Hong_Kong	0		Chaudhary_Charan_Singh_University	0		College_of_Physicians_and_Surgeons_of_Ontario	0		Christian_Medical_College	0		Colombian_School_of_Odontology	0		Eastern_Virginia_Medical_School	0
Dibrugarh_University	0		Central_South_University	0		Clemson	0		Chinese_Academy_of_Medical_Sciences	0		Bejing_Institute_of_Radiation_Medicine	0		Central_South_University	0		Dagestan_Medical_Academy	0		Drew	0		Chittaranjan_National_Cancer_Institute	0		Carleton_University	0		College_of_Saint_Scholastica	0		Chittaranjan_National_Cancer_Institute	0		Chemnitz_University_of_Technology	0		College_of_Saint_Mary	0		Christian-Albrechts_University_at_Kiel	0		Colorado_College	0		Ecole_Centrale_de_Lille	0
Dokuz_Eylul_University	0		Central_University_of_Ecuador	0		Cleveland_Clinic	0		Chinese_Academy_of_Preventative_Medicine	0		Belarusian_State_Medical_University	0		Central_University_of_Ecuador	0		Dalhousie_University	0		Drexel	0		Chongqing_Medical_University	0		Carlos_Albizu_University	0		Colombian_School_of_Odontology	0		Chongqing_Medical_University	0		Chestnut_Hill_College	0		Colombian_School_of_Odontology	0		Christie_Hospital_Manchester	0		Colorado_School_of_Mines	0		Ecole_Centrale_Lyon	0
Dominion_University_Urban	0		Central_University_of_Venezuela	0		Cleveland_State	0		Chinese_Center_for_Disease_Control_and_Prevention	0		Belarusian_State_University	0		Central_University_of_Venezuela	0		Dalian_Institute_of_Chemical_Physics	0		Dropsie_College	0		Chongqing_University	0		Carlow_University	0		Colorado_College	0		Chongqing_University	0		Chiang_Mai_University	0		Colorado_College	0		Chung-Ang_University	0		Colorado_State	0		Ecole_National_Veterinaire_de_Lyon	0
Donetsk_National_Technical_University	0		Centre_for_Cellular_&_Molecular_Biology	0		Cleveland-Marshall_College_of_Law	0		Chinese_University_of_Hong_Kong	0		Bellarmine_University	0		Centre_for_Cellular_&_Molecular_Biology	0		Dalian_Medical_University	0		Dublin_City_University	0		Chonnam_National_University	0		Carnegie_Institute_of_Technology	0		Colorado_School_of_Mines	0		Chonnam_National_University	0		Chiba_University	0		Colorado_School_of_Mines	0		Chungnam_National_University	0		Colorado_Technical_University	0		Ecole_Nationale_Superieure_des_Telecommunications	0
Dongguk_University	0		Centro_de_Investigaciones	0		CNRS_Gif-sur-Yvette	0		Chittaranjan_National_Cancer_Institute	0		Belmont_University	0		Centro_de_Investigaciones	0		Dalian_University_of_Technology	0		Duquesne	0		Christian_Medical_College	0		Carol_Davila_University_of_Medicine	0		Colorado_State	0		Christian-Albrechts_University_at_Kiel	0		Chicago_College_of_Osteopathic_Medicine	0		Colorado_State	0		Cinvestav	0		Columbia_Pacific_University	0		Ecole_Nationale_Veterinaire_d'Alfort	0
Dow_Medical_College	0		Centro_Eleia_Actividades_Psicologicas	0		Cochin_University_of_Science_and_Technology_in_india	0		Chongqing_Medical_University	0		Ben-Gurion_University_of_the_Negev	0		Centro_Eleia_Actividades_Psicologicas	0		Damascus_University	0		Durham_University	0		Christian-Albrechts_University_at_Kiel	0		Catholic_University_Eichstätt-Ingolstadt	0		Colorado_Technical_University	0		Christie_Hospital_Manchester	0		Chicago_Medical_School_Chicago_IL	0		Colorado_Technical_University	0		City_College_(CUNY)	0		Columbia_Theological_Seminary	0		Ecole_Normale_Superieure	0
Dowling_College	0		Chalmers_University_of_Technology	0		Cold_Spring_Harbor	0		Chongqing_University	0		Benedictine	0		Chalmers_University_of_Technology	0		Dankook_University	0		East_Carolina	0		Christie_Hospital_Manchester	0		Catholic_University_of_Leuven	0		Columbia_Pacific_University	0		Chung-Ang_University	0		Chicago_School_of_Professional_Psychology_Chicago_Campus	0		Columbia_Pacific_University	0		City_of_Hope_Graduate_School	0		Columbia_University_Medical_Center	0		Ecole_Normale_Superieure_Paris-Saclay	0
Drake_University	0		Chamberlain_University-Illinois	0		College_de_France	0		Chonnam_National_University	0		Bengbu_Medical_College	0		Chamberlain_University-Illinois	0		Dartmouth	0		East_China_Normal_University	0		Chung-Ang_University	0		Catholic_University_of_Milan	0		Columbia_Theological_Seminary	0		Chungnam_National_University	0		Chicago_School_of_Professional_Psychology_LA_Campus	0		Columbia_Theological_Seminary	0		City_of_Hope_National_Medical_Center	0		Comenius_University	0		Ecole_Polytechnique_Federale_de_Lausanne	0
Drew	0		Changchun_University	0		College_of_Physicians_and_Surgeons_of_Ontario	0		Christian_Medical_College	0		Benha_University	0		Changchun_University	0		Davao_Medical_School	0		East_China_University_of_Science_and_Technology	0		Chungnam_National_University	0		Catholic_University_of_Rome	0		Columbia_University_Medical_Center	0		Cinvestav	0		China_Agricultural_University	0		Columbia_University_Medical_Center	0		City_of_London_Polytechnic	0		Concordia_University-Chicago	0		Edinburgh_Napier_University	0
Dropsie_College	0		Chapman_University	0		College_of_Saint_Mary	0		Christian-Albrechts_University_at_Kiel	0		Bernard_University	0		Chapman_University	0		Dayanand_Medical_College	0		East_Tennessee_State	0		Cinvestav	0		Catholic_University_of_the_Sacred_Heart_Rome	0		Comenius_University	0		City_College_(CUNY)	0		China_Medical_University	0		Comenius_University	0		City_University_of_Hong_Kong	0		Corvinus_University_of_Budapest	0		Edith_Cowan_University	0
Dublin_City_University	0		Charite_University_Medicine	0		College_of_Saint_Scholastica	0		Christie_Hospital_Manchester	0		Bharathidasan_University	0		Charing_Cross_and_Westminster_Medical_Schools	0		De_Montfort_University	0		East_Texas_State_University	0		City_College_(CUNY)	0		Catholic_University_School_of_Medicine_Rome	0		Concordia_University-Chicago	0		City_of_Hope_Graduate_School	0		China_Pharmaceutical_University_Nanjing	0		Concordia_University-Chicago	0		City_University_of_New_York_The	0		Council_of_Scientific_and_Industrial_Research	0		Edward_Via_College_of_Osteopathic_Medicine	0
Duquesne	0		Chatham_University	0		Colombian_School_of_Odontology	0		Chung-Ang_University	0		BHU_Institute_of_Technology	0		Charite_University_Medicine	0		Deakin_University	0		Eastern_Michigan	0		City_of_Hope_Graduate_School	0		Catholic_University_Silva_Henriquez	0		Corvinus_University_of_Budapest	0		City_of_Hope_National_Medical_Center	0		China-National_University_of_Singapore	0		Corvinus_University_of_Budapest	0		Claremont_Graduate	0		Courant_Institute_of_Mathematical_Sciences	0		Ege_University	0
Durham_University	0		Chaudhary_Charan_Singh_University	0		Colorado_College	0		Chungnam_National_University	0		Bielefeld_University	0		Chaudhary_Charan_Singh_University	0		Defence_Research_and_Development_Establishment	0		Eastern_Virginia_Medical_School	0		City_of_Hope_National_Medical_Center	0		Cayetano_Heredia_University	0		Council_of_Scientific_and_Industrial_Research	0		City_of_London_Polytechnic	0		Chinese_Academy_of_Medical_Sciences	0		Council_of_Scientific_and_Industrial_Research	0		Clark	0		Coventry_University	0		Ehime_University	0
East_Carolina	0		Chemnitz_University_of_Technology	0		Colorado_School_of_Mines	0		Cinvestav	0		Bilkent_University	0		Chemnitz_University_of_Technology	0		Delft_University_of_Technology	0		Ecole_Centrale_de_Lille	0		City_of_London_Polytechnic	0		Ceara_State_University	0		Courant_Institute_of_Mathematical_Sciences	0		City_University_of_Hong_Kong	0		Chinese_Academy_of_Preventative_Medicine	0		Courant_Institute_of_Mathematical_Sciences	0		Clark_Atlanta	0		Cracow_University	0		EIM_Institute_of_Health_Professions	0
East_China_Normal_University	0		Chestnut_Hill_College	0		Colorado_State	0		City_College_(CUNY)	0		Biola	0		Chestnut_Hill_College	0		Delta_State_University	0		Ecole_Centrale_Lyon	0		City_University_of_Hong_Kong	0		Cedars-Sinai_Medical_Center	0		Coventry_University	0		Claremont_Graduate	0		Chinese_Center_for_Disease_Control_and_Prevention	0		Coventry_University	0		Clarkson	0		Creighton	0		Eindhoven_University_of_Technology	0
East_China_University_of_Science_and_Technology	0		Chiang_Mai_University	0		Colorado_Technical_University	0		City_of_Hope_Graduate_School	0		Biozentrum_Wuerzburg	0		Chiang_Mai_University	0		DePaul	0		Ecole_National_Veterinaire_de_Lyon	0		Clark	0		Center_for_Molecular_Neurobiology_Hamburg	0		Cracow_University	0		Clark	0		Chinese_University_of_Hong_Kong	0		Cracow_University	0		Clarkson_College	0		CU_Denver	0		Elon_University	0
East_Tennessee_State	0		Chiba_University	0		Columbia_Pacific_University	0		City_of_Hope_National_Medical_Center	0		Birkbeck_College	0		Chiba_University	0		Des_Moines_University	0		Ecole_Nationale_Superieure_des_Telecommunications	0		Clark_Atlanta	0		Center_For_Research_And_Advanced_Studies	0		Creighton	0		Clark_Atlanta	0		Chittaranjan_National_Cancer_Institute	0		Creighton	0		Claude-Bernard_University	0		Cukurova_University	0		Engelhardt_Institute_of_Molecular_Biology	0
East_Texas_State_University	0		Chicago_College_of_Osteopathic_Medicine	0		Columbia_Theological_Seminary	0		City_of_London_Polytechnic	0		Birla_Institute_of_Technology_and_Science	0		Chicago_College_of_Osteopathic_Medicine	0		Deutsches_Elektronen-Synchrotron	0		Ecole_Nationale_Veterinaire_d'Alfort	0		Clarkson	0		Central_Drug_Research_Institute	0		Cukurova_University	0		Clarkson	0		Chongqing_Medical_University	0		Cukurova_University	0		Clemson	0		Curie_Institute_Paris	0		ENSAE_ParisTech	0
Eastern_Michigan	0		Chicago_Medical_School_Chicago_IL	0		Columbia_University_Medical_Center	0		City_University_of_Hong_Kong	0		BJ_Medical_College	0		Chicago_Medical_School_Chicago_IL	0		Devi_Ahilya_University	0		Ecole_Normale_Superieure	0		Clarkson_College	0		Central_Food_Technological_Research_Institute	0		Curie_Institute_Paris	0		Clarkson_College	0		Chongqing_University	0		Curie_Institute_Paris	0		Cleveland_Clinic	0		Curtin_University	0		Eotvos_Lorand_University	0
Ecole_Centrale_de_Lille	0		Chicago_School_of_Professional_Psychology_Chicago_Campus	0		Comenius_University	0		Claremont_Graduate	0		Bloodcenter_of_Wisconsin_Inc	0		Chicago_School_of_Professional_Psychology_Chicago_Campus	0		Dibrugarh_University	0		Ecole_Normale_Superieure_Paris-Saclay	0		Claude-Bernard_University	0		Central_Institute_of_Physical_Culture_Russia	0		Curtin_University	0		Claude-Bernard_University	0		Chonnam_National_University	0		Curtin_University	0		Cleveland_State	0		Czechoslovak_Academy_of_Sciences	0		Erasmus_University_Medical_Center	0
Ecole_Centrale_Lyon	0		Chicago_School_of_Professional_Psychology_LA_Campus	0		Concordia_University-Chicago	0		Clark	0		Bocconi_University	0		Chicago_School_of_Professional_Psychology_LA_Campus	0		Dokuz_Eylul_University	0		Ecole_Polytechnique_Federale_de_Lausanne	0		Clemson	0		Central_Michigan	0		Czechoslovak_Academy_of_Sciences	0		Clemson	0		Christian_Medical_College	0		Czechoslovak_Academy_of_Sciences	0		Cleveland-Marshall_College_of_Law	0		Daemen_College	0		Erasmus_University_Rotterdam	0
Ecole_National_Veterinaire_de_Lyon	0		China_Agricultural_University	0		Corvinus_University_of_Budapest	0		Clark_Atlanta	0		Bogazici_University	0		China_Agricultural_University	0		Dominion_University_Urban	0		Edinburgh_Napier_University	0		Cleveland_Clinic	0		Central_Queensland_University	0		Daemen_College	0		Cleveland_Clinic	0		Christian-Albrechts_University_at_Kiel	0		Daemen_College	0		CNRS_Gif-sur-Yvette	0		Dagestan_Medical_Academy	0		Erciyes_University	0
Ecole_Nationale_Superieure_des_Telecommunications	0		China_Medical_University	0		Council_of_Scientific_and_Industrial_Research	0		Clarkson	0		Bogomolets_National_Medical_University	0		China_Medical_University	0		Donetsk_National_Technical_University	0		Edith_Cowan_University	0		Cleveland_State	0		Central_South_University	0		Dagestan_Medical_Academy	0		Cleveland_State	0		Christie_Hospital_Manchester	0		Dagestan_Medical_Academy	0		Cochin_University_of_Science_and_Technology_in_india	0		Dalian_Institute_of_Chemical_Physics	0		Escola_Paulista_de_Medicina	0
Ecole_Nationale_Veterinaire_d'Alfort	0		China_Pharmaceutical_University_Nanjing	0		Courant_Institute_of_Mathematical_Sciences	0		Clarkson_College	0		Bogomoletz_Institute_of_Physiology	0		China_Pharmaceutical_University_Nanjing	0		Dongguk_University	0		Edward_Via_College_of_Osteopathic_Medicine	0		Cleveland-Marshall_College_of_Law	0		Central_University_of_Ecuador	0		Dalhousie_University	0		Cleveland-Marshall_College_of_Law	0		Chung-Ang_University	0		Dalhousie_University	0		Cold_Spring_Harbor	0		Dalian_Medical_University	0		ETH_Zurich	0
Ecole_Normale_Superieure	0		China-National_University_of_Singapore	0		Coventry_University	0		Claude-Bernard_University	0		Boise_State	0		China-National_University_of_Singapore	0		Dow_Medical_College	0		Ege_University	0		CNRS_Gif-sur-Yvette	0		Central_University_of_Venezuela	0		Dalian_Institute_of_Chemical_Physics	0		CNRS_Gif-sur-Yvette	0		Chungnam_National_University	0		Dalian_Institute_of_Chemical_Physics	0		College_de_France	0		Dalian_University_of_Technology	0		Eurotechnical_Research_University	0
Ecole_Normale_Superieure_Paris-Saclay	0		Chinese_Academy_of_Medical_Sciences	0		Cracow_University	0		Clemson	0		Bolan_Medical_College	0		Chinese_Academy_of_Medical_Sciences	0		Dowling_College	0		Ehime_University	0		Cochin_University_of_Science_and_Technology_in_india	0		Centre_for_Cellular_&_Molecular_Biology	0		Dalian_Medical_University	0		Cochin_University_of_Science_and_Technology_in_india	0		Cinvestav	0		Dalian_Medical_University	0		College_of_Physicians_and_Surgeons_of_Ontario	0		Damascus_University	0		Evangelical_University_of_Parana	0
Ecole_Polytechnique_Federale_de_Lausanne	0		Chinese_Academy_of_Preventative_Medicine	0		Creighton	0		Cleveland_Clinic	0		Bose_Institute_Calcutta	0		Chinese_Academy_of_Preventative_Medicine	0		Drake_University	0		EIM_Institute_of_Health_Professions	0		Cold_Spring_Harbor	0		Centro_Eleia_Actividades_Psicologicas	0		Dalian_University_of_Technology	0		Cold_Spring_Harbor	0		City_College_(CUNY)	0		Dalian_University_of_Technology	0		College_of_Saint_Mary	0		Dankook_University	0		Ewha_Women's_University	0
Edinburgh_Napier_University	0		Chinese_Center_for_Disease_Control_and_Prevention	0		Cukurova_University	0		Cleveland_State	0		Boston_College	0		Chinese_Center_for_Disease_Control_and_Prevention	0		Drew	0		Eindhoven_University_of_Technology	0		College_of_Physicians_and_Surgeons_of_Ontario	0		Chalmers_University_of_Technology	0		Damascus_University	0		College_de_France	0		City_of_Hope_Graduate_School	0		Damascus_University	0		College_of_Saint_Scholastica	0		Davao_Medical_School	0		Fachhochschule_of_Tech_Wurzburg	0
Edith_Cowan_University	0		Chinese_University_of_Hong_Kong	0		Curie_Institute_Paris	0		Cleveland-Marshall_College_of_Law	0		Boston_University	0		Chinese_University_of_Hong_Kong	0		Drexel	0		Elon_University	0		College_of_Saint_Mary	0		Chamberlain_University-Illinois	0		Dankook_University	0		College_of_Physicians_and_Surgeons_of_Ontario	0		City_of_Hope_National_Medical_Center	0		Dankook_University	0		Colombian_School_of_Odontology	0		Dayanand_Medical_College	0		Faculdade_de_Ciencias_Agrarias_do_Planalto_Central	0
Edward_Via_College_of_Osteopathic_Medicine	0		Chittaranjan_National_Cancer_Institute	0		Curtin_University	0		CNRS_Gif-sur-Yvette	0		Bournemouth_University_United_Kingdom	0		Chittaranjan_National_Cancer_Institute	0		Dropsie_College	0		Engelhardt_Institute_of_Molecular_Biology	0		College_of_Saint_Scholastica	0		Changchun_University	0		Dartmouth	0		College_of_Saint_Mary	0		City_of_London_Polytechnic	0		Davao_Medical_School	0		Colorado_College	0		De_Montfort_University	0		Faculte_des_Sciences_de_Luminy	0
Ege_University	0		Chongqing_Medical_University	0		Czechoslovak_Academy_of_Sciences	0		Cochin_University_of_Science_and_Technology_in_india	0		Bowling_Green_State	0		Chongqing_Medical_University	0		Dublin_City_University	0		ENSAE_ParisTech	0		Colombian_School_of_Odontology	0		Chapman_University	0		Davao_Medical_School	0		College_of_Saint_Scholastica	0		City_University_of_Hong_Kong	0		Dayanand_Medical_College	0		Colorado_School_of_Mines	0		Deakin_University	0		Fairleigh_Dickinson	0
Ehime_University	0		Chongqing_University	0		Daemen_College	0		College_de_France	0		Brescia_University	0		Chongqing_University	0		Duquesne	0		Eotvos_Lorand_University	0		Colorado_College	0		Charing_Cross_and_Westminster_Medical_Schools	0		Dayanand_Medical_College	0		Colombian_School_of_Odontology	0		Claremont_Graduate	0		De_Montfort_University	0		Colorado_Technical_University	0		Defence_Research_and_Development_Establishment	0		Far_Eastern_Federal_University	0
EIM_Institute_of_Health_Professions	0		Chonnam_National_University	0		Dagestan_Medical_Academy	0		College_of_Physicians_and_Surgeons_of_Ontario	0		Brigham_Young	0		Chonnam_National_University	0		East_China_Normal_University	0		Erasmus_University_Medical_Center	0		Colorado_School_of_Mines	0		Charite_University_Medicine	0		De_Montfort_University	0		Colorado_College	0		Clark	0		Deakin_University	0		Columbia_Pacific_University	0		Delft_University_of_Technology	0		Far_Eastern_University_Philippines	0
Eindhoven_University_of_Technology	0		Christian_Medical_College	0		Dalhousie_University	0		College_of_Saint_Mary	0		Brock_University	0		Christian_Medical_College	0		East_China_University_of_Science_and_Technology	0		Erasmus_University_Rotterdam	0		Colorado_Technical_University	0		Charles_University_in_Prague	0		Deakin_University	0		Colorado_School_of_Mines	0		Clark_Atlanta	0		Defence_Research_and_Development_Establishment	0		Columbia_Theological_Seminary	0		Delta_State_University	0		Fatima_Jinnah_Medical_College	0
Elon_University	0		Christian-Albrechts_University_at_Kiel	0		Dalian_Institute_of_Chemical_Physics	0		College_of_Saint_Scholastica	0		Brooklyn_College_(CUNY)	0		Christian-Albrechts_University_at_Kiel	0		East_Tennessee_State	0		Erciyes_University	0		Columbia_Pacific_University	0		Chatham_University	0		Defence_Research_and_Development_Establishment	0		Colorado_State	0		Clarkson	0		Delft_University_of_Technology	0		Columbia_University_Medical_Center	0		DePaul	0		Favaloro_University	0
Emory	0		Christie_Hospital_Manchester	0		Dalian_Medical_University	0		Colombian_School_of_Odontology	0		Brooklyn_Law_School	0		Christie_Hospital_Manchester	0		East_Texas_State_University	0		Escola_Paulista_de_Medicina	0		Columbia_Theological_Seminary	0		Chaudhary_Charan_Singh_University	0		Delft_University_of_Technology	0		Colorado_Technical_University	0		Clarkson_College	0		Delta_State_University	0		Comenius_University	0		Des_Moines_University	0		Fayetteville_State_University	0
Engelhardt_Institute_of_Molecular_Biology	0		Chung-Ang_University	0		Dalian_University_of_Technology	0		Colorado_College	0		Brunel_University	0		Chung-Ang_University	0		Eastern_Michigan	0		ETH_Zurich	0		Columbia_University_Medical_Center	0		Chemnitz_University_of_Technology	0		Delta_State_University	0		Columbia_Pacific_University	0		Clemson	0		DePaul	0		Concordia_University-Chicago	0		Deutsches_Elektronen-Synchrotron	0		Federal_University_of_Ceara	0
ENSAE_ParisTech	0		Chungnam_National_University	0		Damascus_University	0		Colorado_School_of_Mines	0		Bryn_Mawr	0		Chungnam_National_University	0		Eastern_Virginia_Medical_School	0		European_Molecular_Biology_Laboratory	0		Comenius_University	0		Chestnut_Hill_College	0		DePaul	0		Columbia_Theological_Seminary	0		Cleveland_Clinic	0		Des_Moines_University	0		Corvinus_University_of_Budapest	0		Devi_Ahilya_University	0		Federal_University_of_Espírito_Santo	0
Eotvos_Lorand_University	0		Cinvestav	0		Dankook_University	0		Colorado_State	0		Buryate_State_Agricultural_Academy	0		Cinvestav	0		Ecole_Centrale_de_Lille	0		Eurotechnical_Research_University	0		Concordia_University-Chicago	0		Chiang_Mai_University	0		Des_Moines_University	0		Columbia_University_Medical_Center	0		Cleveland_State	0		Deutsches_Elektronen-Synchrotron	0		Council_of_Scientific_and_Industrial_Research	0		Dibrugarh_University	0		Federal_University_of_Goias	0
Erasmus_University_Medical_Center	0		City_College_(CUNY)	0		Davao_Medical_School	0		Colorado_Technical_University	0		Butler_University	0		City_College_(CUNY)	0		Ecole_Centrale_Lyon	0		Evangelical_University_of_Parana	0		Corvinus_University_of_Budapest	0		Chiba_University	0		Deutsches_Elektronen-Synchrotron	0		Comenius_University	0		Cleveland-Marshall_College_of_Law	0		Devi_Ahilya_University	0		Courant_Institute_of_Mathematical_Sciences	0		Dokuz_Eylul_University	0		Federal_University_of_Juiz_de_Fora	0
Erasmus_University_Rotterdam	0		City_of_Hope_Graduate_School	0		Dayanand_Medical_College	0		Columbia_Pacific_University	0		Calcutta_National_Medical_College	0		City_of_Hope_Graduate_School	0		Ecole_National_Veterinaire_de_Lyon	0		Ewha_Women's_University	0		Council_of_Scientific_and_Industrial_Research	0		Chicago_College_of_Osteopathic_Medicine	0		Devi_Ahilya_University	0		Concordia_University-Chicago	0		CNRS_Gif-sur-Yvette	0		Dibrugarh_University	0		Coventry_University	0		Dominion_University_Urban	0		Federal_University_of_Mato_Grosso_do_Sul	0
Erciyes_University	0		City_of_Hope_National_Medical_Center	0		De_Montfort_University	0		Columbia_Theological_Seminary	0		Calicut_Medical_College	0		City_of_Hope_National_Medical_Center	0		Ecole_Nationale_Superieure_des_Telecommunications	0		Fachhochschule_of_Tech_Wurzburg	0		Courant_Institute_of_Mathematical_Sciences	0		Chicago_Medical_School_Chicago_IL	0		Dibrugarh_University	0		Corvinus_University_of_Budapest	0		Cochin_University_of_Science_and_Technology_in_india	0		Dokuz_Eylul_University	0		Cracow_University	0		Donetsk_National_Technical_University	0		Federal_University_of_Pernambuco	0
Escola_Paulista_de_Medicina	0		City_of_London_Polytechnic	0		Deakin_University	0		Columbia_University_Medical_Center	0		California_Coast_University	0		City_of_London_Polytechnic	0		Ecole_Nationale_Veterinaire_d'Alfort	0		Faculdade_de_Ciencias_Agrarias_do_Planalto_Central	0		Coventry_University	0		Chicago_School_of_Professional_Psychology_Chicago_Campus	0		Dokuz_Eylul_University	0		Council_of_Scientific_and_Industrial_Research	0		College_de_France	0		Dominion_University_Urban	0		Creighton	0		Dongguk_University	0		Federal_University_of_Rio_de_Janeiro	0
ETH_Zurich	0		City_University_of_Hong_Kong	0		Defence_Research_and_Development_Establishment	0		Comenius_University	0		California_Institute_of_Integral_Studies	0		City_University_of_Hong_Kong	0		Ecole_Normale_Superieure	0		Faculte_des_Sciences_de_Luminy	0		Cracow_University	0		Chicago_School_of_Professional_Psychology_LA_Campus	0		Dominion_University_Urban	0		Courant_Institute_of_Mathematical_Sciences	0		College_of_Physicians_and_Surgeons_of_Ontario	0		Donetsk_National_Technical_University	0		Cukurova_University	0		Dow_Medical_College	0		Federal_University_of_Rio_Grande_do_Norte	0
Eurotechnical_Research_University	0		City_University_of_New_York_The	0		Delft_University_of_Technology	0		Concordia_University-Chicago	0		California_Polytechnic_State_University_San_Luis_Obispo	0		Claremont_Graduate	0		Ecole_Normale_Superieure_Paris-Saclay	0		Fairleigh_Dickinson	0		Cukurova_University	0		China_Agricultural_University	0		Donetsk_National_Technical_University	0		Coventry_University	0		College_of_Saint_Mary	0		Dongguk_University	0		Curie_Institute_Paris	0		Dowling_College	0		Federal_University_of_Rio_Grande_do_Sul	0
Evangelical_University_of_Parana	0		Claremont_Graduate	0		Delta_State_University	0		Corvinus_University_of_Budapest	0		California_School_of_Professional_Psychology_Alameda	0		Clark	0		Ecole_Polytechnique_Federale_de_Lausanne	0		Far_Eastern_Federal_University	0		Curie_Institute_Paris	0		China_Medical_University	0		Dongguk_University	0		Cracow_University	0		College_of_Saint_Scholastica	0		Dow_Medical_College	0		Curtin_University	0		Drake_University	0		Federal_University_of_Santa_Catarina	0
Ewha_Women's_University	0		Clark	0		DePaul	0		Council_of_Scientific_and_Industrial_Research	0		California_School_of_Professional_Psychology_Berkeley	0		Clark_Atlanta	0		Edinburgh_Napier_University	0		Far_Eastern_University_Philippines	0		Curtin_University	0		China-National_University_of_Singapore	0		Dow_Medical_College	0		Creighton	0		Colombian_School_of_Odontology	0		Dowling_College	0		Czechoslovak_Academy_of_Sciences	0		Drew	0		Federal_University_of_Santa_Maria	0
Fachhochschule_of_Tech_Wurzburg	0		Clark_Atlanta	0		Des_Moines_University	0		Courant_Institute_of_Mathematical_Sciences	0		California_School_of_Professional_Psychology_Fresno	0		Clarkson	0		Edith_Cowan_University	0		Fatima_Jinnah_Medical_College	0		Czechoslovak_Academy_of_Sciences	0		Chinese_Academy_of_Medical_Sciences	0		Dowling_College	0		Cukurova_University	0		Colorado_College	0		Drake_University	0		Daemen_College	0		Drexel	0		Federal_University_of_Sao_Paulo	0
Faculdade_de_Ciencias_Agrarias_do_Planalto_Central	0		Clarkson	0		Deutsches_Elektronen-Synchrotron	0		Coventry_University	0		California_School_of_Professional_Psychology_Los_Angeles	0		Clarkson_College	0		Edward_Via_College_of_Osteopathic_Medicine	0		Favaloro_University	0		Daemen_College	0		Chinese_Academy_of_Preventative_Medicine	0		Drake_University	0		Curie_Institute_Paris	0		Colorado_School_of_Mines	0		Drew	0		Dagestan_Medical_Academy	0		Dropsie_College	0		Federal_University_of_Uberlandia	0
Faculte_des_Sciences_de_Luminy	0		Clarkson_College	0		Devi_Ahilya_University	0		Cracow_University	0		California_School_of_Professional_Psychology_San_Diego	0		Claude-Bernard_University	0		Ege_University	0		Fayetteville_State_University	0		Dagestan_Medical_Academy	0		Chinese_Center_for_Disease_Control_and_Prevention	0		Drew	0		Curtin_University	0		Colorado_Technical_University	0		Dropsie_College	0		Dalhousie_University	0		Dublin_City_University	0		Federal_University_of_Vicosa	0
Fairleigh_Dickinson	0		Claude-Bernard_University	0		Dibrugarh_University	0		Creighton	0		California_School_of_Professional_Psychology_San_Francisco	0		Clemson	0		Ehime_University	0		Federal_University_of_Ceara	0		Dalhousie_University	0		Chinese_University_of_Hong_Kong	0		Drexel	0		Czechoslovak_Academy_of_Sciences	0		Columbia_Pacific_University	0		Dublin_City_University	0		Dalian_Institute_of_Chemical_Physics	0		Duquesne	0		Ferris_State_University	0
Far_Eastern_Federal_University	0		Clemson	0		Dokuz_Eylul_University	0		CU_Denver	0		California_State_University_Channel_Islands	0		Cleveland_Clinic	0		EIM_Institute_of_Health_Professions	0		Federal_University_of_Espírito_Santo	0		Dalian_Institute_of_Chemical_Physics	0		Chittaranjan_National_Cancer_Institute	0		Dropsie_College	0		Daemen_College	0		Columbia_Theological_Seminary	0		Duquesne	0		Dalian_Medical_University	0		Durham_University	0		Fielding_Graduate	0
Far_Eastern_University_Philippines	0		Cleveland_Clinic	0		Dominion_University_Urban	0		Cukurova_University	0		Campbell_University	0		Cleveland-Marshall_College_of_Law	0		Eindhoven_University_of_Technology	0		Federal_University_of_Goias	0		Dalian_Medical_University	0		Chongqing_University	0		Dublin_City_University	0		Dagestan_Medical_Academy	0		Columbia_University_Medical_Center	0		Durham_University	0		Dalian_University_of_Technology	0		East_Carolina	0		Finch_University	0
Fatima_Jinnah_Medical_College	0		Cleveland_State	0		Donetsk_National_Technical_University	0		Curie_Institute_Paris	0		Capella_University	0		CNRS_Gif-sur-Yvette	0		Elon_University	0		Federal_University_of_Juiz_de_Fora	0		Dalian_University_of_Technology	0		Chonnam_National_University	0		Duquesne	0		Dalian_Institute_of_Chemical_Physics	0		Comenius_University	0		East_Carolina	0		Damascus_University	0		East_China_Normal_University	0		Finch_University_of_Health_Sciences_Chicago	0
Favaloro_University	0		Cleveland-Marshall_College_of_Law	0		Dongguk_University	0		Curtin_University	0		Capital_University	0		Cochin_University_of_Science_and_Technology_in_india	0		Engelhardt_Institute_of_Molecular_Biology	0		Federal_University_of_Mato_Grosso_do_Sul	0		Damascus_University	0		Christian_Medical_College	0		Durham_University	0		Dalian_Medical_University	0		Concordia_University-Chicago	0		East_China_Normal_University	0		Dankook_University	0		East_China_University_of_Science_and_Technology	0		First_Medical_School_University_of_Naples	0
Fayetteville_State_University	0		CNRS_Gif-sur-Yvette	0		Dow_Medical_College	0		Czechoslovak_Academy_of_Sciences	0		Cappella_University	0		Cold_Spring_Harbor	0		ENSAE_ParisTech	0		Federal_University_of_Pernambuco	0		Dankook_University	0		Christian-Albrechts_University_at_Kiel	0		East_Carolina	0		Dalian_University_of_Technology	0		Corvinus_University_of_Budapest	0		East_China_University_of_Science_and_Technology	0		Davao_Medical_School	0		East_Tennessee_State	0		First_Moscow_State_Medical_University	0
Federal_University_of_Ceara	0		Cochin_University_of_Science_and_Technology_in_india	0		Dowling_College	0		Daemen_College	0		Cardinal_Stritch	0		College_de_France	0		Erasmus_University_Medical_Center	0		Federal_University_of_Rio_de_Janeiro	0		Davao_Medical_School	0		Christie_Hospital_Manchester	0		East_China_Normal_University	0		Dankook_University	0		Council_of_Scientific_and_Industrial_Research	0		East_Tennessee_State	0		Dayanand_Medical_College	0		East_Texas_State_University	0		Flinders_University	0
Federal_University_of_Espírito_Santo	0		Cold_Spring_Harbor	0		Drake_University	0		Dagestan_Medical_Academy	0		Carleton_University	0		College_of_Physicians_and_Surgeons_of_Ontario	0		Erasmus_University_Rotterdam	0		Federal_University_of_Rio_Grande_do_Norte	0		Dayanand_Medical_College	0		Chung-Ang_University	0		East_Texas_State_University	0		Dartmouth	0		Courant_Institute_of_Mathematical_Sciences	0		East_Texas_State_University	0		De_Montfort_University	0		Eastern_Michigan	0		Florida_A&M	0
Federal_University_of_Goias	0		College_de_France	0		Drew	0		Dalhousie_University	0		Carlos_Albizu_University	0		College_of_Saint_Mary	0		Erciyes_University	0		Federal_University_of_Rio_Grande_do_Sul	0		De_Montfort_University	0		Chungnam_National_University	0		Eastern_Michigan	0		Davao_Medical_School	0		Coventry_University	0		Eastern_Michigan	0		Deakin_University	0		Eastern_Virginia_Medical_School	0		Florida_Atlantic	0
Federal_University_of_Juiz_de_Fora	0		College_of_Physicians_and_Surgeons_of_Ontario	0		Dropsie_College	0		Dalian_Institute_of_Chemical_Physics	0		Carlow_University	0		College_of_Saint_Scholastica	0		Escola_Paulista_de_Medicina	0		Federal_University_of_Santa_Maria	0		Deakin_University	0		Cinvestav	0		Eastern_Virginia_Medical_School	0		Dayanand_Medical_College	0		Cracow_University	0		Eastern_Virginia_Medical_School	0		Defence_Research_and_Development_Establishment	0		Ecole_Centrale_de_Lille	0		Florida_Institute_of_Technology	0
Federal_University_of_Mato_Grosso_do_Sul	0		College_of_Saint_Mary	0		Dublin_City_University	0		Dalian_Medical_University	0		Carnegie_Institute_of_Technology	0		Colombian_School_of_Odontology	0		ETH_Zurich	0		Federal_University_of_Sao_Paulo	0		Defence_Research_and_Development_Establishment	0		City_College_(CUNY)	0		Ecole_Centrale_de_Lille	0		De_Montfort_University	0		Creighton	0		Ecole_Centrale_de_Lille	0		Delft_University_of_Technology	0		Ecole_Centrale_Lyon	0		Florida_International	0
Federal_University_of_Pernambuco	0		College_of_Saint_Scholastica	0		Duquesne	0		Dalian_University_of_Technology	0		Carol_Davila_University_of_Medicine	0		Colorado_College	0		European_Molecular_Biology_Laboratory	0		Federal_University_of_Uberlandia	0		Delft_University_of_Technology	0		City_of_Hope_Graduate_School	0		Ecole_Centrale_Lyon	0		Deakin_University	0		CU_Denver	0		Ecole_Centrale_Lyon	0		Delta_State_University	0		Ecole_National_Veterinaire_de_Lyon	0		Florida_State	0
Federal_University_of_Rio_de_Janeiro	0		Colombian_School_of_Odontology	0		Durham_University	0		Damascus_University	0		Catholic_University_Eichstätt-Ingolstadt	0		Colorado_School_of_Mines	0		Eurotechnical_Research_University	0		Federal_University_of_Vicosa	0		Delta_State_University	0		City_of_Hope_National_Medical_Center	0		Ecole_National_Veterinaire_de_Lyon	0		Defence_Research_and_Development_Establishment	0		Cukurova_University	0		Ecole_National_Veterinaire_de_Lyon	0		DePaul	0		Ecole_Nationale_Superieure_des_Telecommunications	0		Fordham	0
Federal_University_of_Rio_Grande_do_Norte	0		Colorado_College	0		East_Carolina	0		Dankook_University	0		Catholic_University_of_America	0		Colorado_Technical_University	0		Evangelical_University_of_Parana	0		Ferris_State_University	0		DePaul	0		City_of_London_Polytechnic	0		Ecole_Nationale_Superieure_des_Telecommunications	0		Delft_University_of_Technology	0		Curie_Institute_Paris	0		Ecole_Nationale_Superieure_des_Telecommunications	0		Des_Moines_University	0		Ecole_Nationale_Veterinaire_d'Alfort	0		Fourth_Military_Medical_University	0
Federal_University_of_Rio_Grande_do_Sul	0		Colorado_School_of_Mines	0		East_China_Normal_University	0		Davao_Medical_School	0		Catholic_University_of_Leuven	0		Columbia_Pacific_University	0		Ewha_Women's_University	0		Fielding_Graduate	0		Des_Moines_University	0		City_University_of_Hong_Kong	0		Ecole_Nationale_Veterinaire_d'Alfort	0		Delta_State_University	0		Curtin_University	0		Ecole_Nationale_Veterinaire_d'Alfort	0		Deutsches_Elektronen-Synchrotron	0		Ecole_Normale_Superieure	0		Francois_Rabelais_University	0
Federal_University_of_Santa_Catarina	0		Colorado_Technical_University	0		East_China_University_of_Science_and_Technology	0		De_Montfort_University	0		Catholic_University_of_Milan	0		Columbia_Theological_Seminary	0		Fachhochschule_of_Tech_Wurzburg	0		Finch_University	0		Deutsches_Elektronen-Synchrotron	0		City_University_of_New_York_The	0		Ecole_Normale_Superieure	0		DePaul	0		Czechoslovak_Academy_of_Sciences	0		Ecole_Normale_Superieure	0		Devi_Ahilya_University	0		Ecole_Normale_Superieure_Paris-Saclay	0		Franklin_Pierce_Law_Center	0
Federal_University_of_Santa_Maria	0		Columbia_Pacific_University	0		East_Tennessee_State	0		Deakin_University	0		Catholic_University_of_Rome	0		Columbia_University_Medical_Center	0		Faculdade_de_Ciencias_Agrarias_do_Planalto_Central	0		Finch_University_of_Health_Sciences_Chicago	0		Devi_Ahilya_University	0		Clark_Atlanta	0		Ecole_Normale_Superieure_Paris-Saclay	0		Des_Moines_University	0		Daemen_College	0		Ecole_Normale_Superieure_Paris-Saclay	0		Dibrugarh_University	0		Ecole_Polytechnique_Federale_de_Lausanne	0		Free_University_Berlin	0
Federal_University_of_Sao_Paulo	0		Columbia_Theological_Seminary	0		East_Texas_State_University	0		Defence_Research_and_Development_Establishment	0		Catholic_University_of_the_Sacred_Heart_Rome	0		Comenius_University	0		Faculte_des_Sciences_de_Luminy	0		First_Medical_School_University_of_Naples	0		Dibrugarh_University	0		Clarkson	0		Ecole_Polytechnique_Federale_de_Lausanne	0		Deutsches_Elektronen-Synchrotron	0		Dagestan_Medical_Academy	0		Ecole_Polytechnique_Federale_de_Lausanne	0		Dokuz_Eylul_University	0		Edinburgh_Napier_University	0		Freie_University_of_Berlin	0
Federal_University_of_Uberlandia	0		Columbia_University_Medical_Center	0		Eastern_Michigan	0		Delft_University_of_Technology	0		Catholic_University_School_of_Medicine_Rome	0		Concordia_University-Chicago	0		Fairleigh_Dickinson	0		First_Moscow_State_Medical_University	0		Dokuz_Eylul_University	0		Clarkson_College	0		Edinburgh_Napier_University	0		Devi_Ahilya_University	0		Dalhousie_University	0		Edinburgh_Napier_University	0		Dominion_University_Urban	0		Edith_Cowan_University	0		Friedrich-Alexander_University_of_Erlangen-Nurnberg	0
Federal_University_of_Vicosa	0		Comenius_University	0		Eastern_Virginia_Medical_School	0		Delta_State_University	0		Catholic_University_Silva_Henriquez	0		Corvinus_University_of_Budapest	0		Far_Eastern_Federal_University	0		Flinders_University	0		Dominion_University_Urban	0		Claude-Bernard_University	0		Edith_Cowan_University	0		Dibrugarh_University	0		Dalian_Institute_of_Chemical_Physics	0		Edith_Cowan_University	0		Donetsk_National_Technical_University	0		Edward_Via_College_of_Osteopathic_Medicine	0		Friedrich-Schiller_University_of_Jena	0
Ferris_State_University	0		Concordia_University-Chicago	0		Ecole_Centrale_de_Lille	0		Des_Moines_University	0		Cayetano_Heredia_University	0		Council_of_Scientific_and_Industrial_Research	0		Far_Eastern_University_Philippines	0		Florida_A&M	0		Donetsk_National_Technical_University	0		Cleveland_Clinic	0		Edward_Via_College_of_Osteopathic_Medicine	0		Dokuz_Eylul_University	0		Dalian_Medical_University	0		Edward_Via_College_of_Osteopathic_Medicine	0		Dongguk_University	0		Ege_University	0		Frontier_Nursing_University	0
Fielding_Graduate	0		Corvinus_University_of_Budapest	0		Ecole_Centrale_Lyon	0		Deutsches_Elektronen-Synchrotron	0		Ceara_State_University	0		Courant_Institute_of_Mathematical_Sciences	0		Fatima_Jinnah_Medical_College	0		Florida_Atlantic	0		Dongguk_University	0		Cleveland_State	0		Ege_University	0		Dominion_University_Urban	0		Dalian_University_of_Technology	0		Ege_University	0		Dow_Medical_College	0		Ehime_University	0		Frumkin_Institute_of_Electrochemistry	0
Finch_University	0		Council_of_Scientific_and_Industrial_Research	0		Ecole_National_Veterinaire_de_Lyon	0		Devi_Ahilya_University	0		Cedars-Sinai_Medical_Center	0		Coventry_University	0		Favaloro_University	0		Florida_Institute_of_Technology	0		Dow_Medical_College	0		Cleveland-Marshall_College_of_Law	0		Ehime_University	0		Donetsk_National_Technical_University	0		Damascus_University	0		Ehime_University	0		Dowling_College	0		EIM_Institute_of_Health_Professions	0		Fudan_University	0
Finch_University_of_Health_Sciences_Chicago	0		Courant_Institute_of_Mathematical_Sciences	0		Ecole_Nationale_Superieure_des_Telecommunications	0		Dibrugarh_University	0		Center_for_Molecular_Neurobiology_Hamburg	0		Cracow_University	0		Fayetteville_State_University	0		Florida_International	0		Dowling_College	0		CNRS_Gif-sur-Yvette	0		EIM_Institute_of_Health_Professions	0		Dongguk_University	0		Dankook_University	0		EIM_Institute_of_Health_Professions	0		Drake_University	0		Eindhoven_University_of_Technology	0		Fujian_Agriculture_and_Forestry_University	0
First_Medical_School_University_of_Naples	0		Coventry_University	0		Ecole_Nationale_Veterinaire_d'Alfort	0		Dokuz_Eylul_University	0		Center_For_Research_And_Advanced_Studies	0		Creighton	0		Federal_University_of_Ceara	0		Florida_State	0		Drake_University	0		Cochin_University_of_Science_and_Technology_in_india	0		Eindhoven_University_of_Technology	0		Dow_Medical_College	0		Davao_Medical_School	0		Eindhoven_University_of_Technology	0		Drew	0		Elon_University	0		Fujian_Medical_University	0
First_Moscow_State_Medical_University	0		Creighton	0		Ecole_Normale_Superieure	0		Dominion_University_Urban	0		Central_Drug_Research_Institute	0		Cukurova_University	0		Federal_University_of_Espírito_Santo	0		Fordham	0		Drew	0		Cold_Spring_Harbor	0		Elon_University	0		Dowling_College	0		Dayanand_Medical_College	0		Elon_University	0		Dropsie_College	0		Engelhardt_Institute_of_Molecular_Biology	0		Fujita_Health_University	0
Flinders_University	0		Cukurova_University	0		Ecole_Normale_Superieure_Paris-Saclay	0		Donetsk_National_Technical_University	0		Central_Food_Technological_Research_Institute	0		Curie_Institute_Paris	0		Federal_University_of_Goias	0		Fourth_Military_Medical_University	0		Drexel	0		College_de_France	0		Engelhardt_Institute_of_Molecular_Biology	0		Drake_University	0		De_Montfort_University	0		Engelhardt_Institute_of_Molecular_Biology	0		Dublin_City_University	0		ENSAE_ParisTech	0		Fukui_Medical_University_of_Japan	0
Florida_A&M	0		Curtin_University	0		Ecole_Polytechnique_Federale_de_Lausanne	0		Dongguk_University	0		Central_Institute_of_Physical_Culture_Russia	0		Curtin_University	0		Federal_University_of_Juiz_de_Fora	0		Francois_Rabelais_University	0		Dropsie_College	0		College_of_Physicians_and_Surgeons_of_Ontario	0		ENSAE_ParisTech	0		Drew	0		Deakin_University	0		ENSAE_ParisTech	0		Duquesne	0		Eotvos_Lorand_University	0		Fukushima_Medical_University	0
Florida_Atlantic	0		Czechoslovak_Academy_of_Sciences	0		Edinburgh_Napier_University	0		Dow_Medical_College	0		Central_Michigan	0		Czechoslovak_Academy_of_Sciences	0		Federal_University_of_Mato_Grosso_do_Sul	0		Franklin_Pierce_Law_Center	0		Dublin_City_University	0		College_of_Saint_Mary	0		Eotvos_Lorand_University	0		Drexel	0		Defence_Research_and_Development_Establishment	0		Eotvos_Lorand_University	0		Durham_University	0		Erasmus_University_Medical_Center	0		Fuller_Graduate_School_of_Psychology_Pasadena_CA	0
Florida_Institute_of_Technology	0		Daemen_College	0		Edith_Cowan_University	0		Dowling_College	0		Central_Queensland_University	0		Daemen_College	0		Federal_University_of_Pernambuco	0		Free_University_Berlin	0		Duquesne	0		College_of_Saint_Scholastica	0		Erasmus_University_Medical_Center	0		Dropsie_College	0		Delft_University_of_Technology	0		Erasmus_University_Medical_Center	0		East_Carolina	0		Erasmus_University_Rotterdam	0		Fuller_Theological_Seminary	0
Florida_International	0		Dagestan_Medical_Academy	0		Edward_Via_College_of_Osteopathic_Medicine	0		Drake_University	0		Central_South_University	0		Dagestan_Medical_Academy	0		Federal_University_of_Rio_de_Janeiro	0		Freie_University_of_Berlin	0		Durham_University	0		Colombian_School_of_Odontology	0		Erasmus_University_Rotterdam	0		Dublin_City_University	0		Delta_State_University	0		Erciyes_University	0		East_China_Normal_University	0		Erciyes_University	0		Gabrichevsky_Research_Institute_of_Epidemiology_and_Microbiology	0
Florida_State	0		Dalhousie_University	0		Ehime_University	0		Drew	0		Central_University_of_Ecuador	0		Dalian_Institute_of_Chemical_Physics	0		Federal_University_of_Rio_Grande_do_Norte	0		Friedrich-Alexander_University_of_Erlangen-Nurnberg	0		East_Carolina	0		Colorado_College	0		Erciyes_University	0		Duquesne	0		DePaul	0		Escola_Paulista_de_Medicina	0		East_China_University_of_Science_and_Technology	0		Escola_Paulista_de_Medicina	0		Gajra_Raja_Medical_College	0
Fordham	0		Dalian_Institute_of_Chemical_Physics	0		EIM_Institute_of_Health_Professions	0		Drexel	0		Centre_for_Cellular_&_Molecular_Biology	0		Dalian_Medical_University	0		Federal_University_of_Rio_Grande_do_Sul	0		Friedrich-Schiller_University_of_Jena	0		East_China_Normal_University	0		Colorado_School_of_Mines	0		Escola_Paulista_de_Medicina	0		Durham_University	0		Des_Moines_University	0		ETH_Zurich	0		East_Tennessee_State	0		European_Molecular_Biology_Laboratory	0		Gallaudet	0
Fourth_Military_Medical_University	0		Dalian_Medical_University	0		Eindhoven_University_of_Technology	0		Dropsie_College	0		Centro_de_Investigaciones	0		Dalian_University_of_Technology	0		Federal_University_of_Santa_Catarina	0		Frontier_Nursing_University	0		East_China_University_of_Science_and_Technology	0		Colorado_Technical_University	0		European_Molecular_Biology_Laboratory	0		East_China_Normal_University	0		Deutsches_Elektronen-Synchrotron	0		European_Molecular_Biology_Laboratory	0		East_Texas_State_University	0		Eurotechnical_Research_University	0		Gandhi_Medical_College_Hyderabad_India	0
Francois_Rabelais_University	0		Dalian_University_of_Technology	0		Elon_University	0		Dublin_City_University	0		Centro_Eleia_Actividades_Psicologicas	0		Damascus_University	0		Federal_University_of_Santa_Maria	0		Frumkin_Institute_of_Electrochemistry	0		East_Tennessee_State	0		Columbia_Pacific_University	0		Eurotechnical_Research_University	0		East_China_University_of_Science_and_Technology	0		Devi_Ahilya_University	0		Eurotechnical_Research_University	0		Eastern_Michigan	0		Evangelical_University_of_Parana	0		Ganesh_Shankar_Vidyarthi_Memorial_Medical_College	0
Franklin_Pierce_Law_Center	0		Damascus_University	0		Engelhardt_Institute_of_Molecular_Biology	0		Duquesne	0		Chalmers_University_of_Technology	0		Dankook_University	0		Federal_University_of_Sao_Paulo	0		Fudan_University	0		East_Texas_State_University	0		Columbia_Theological_Seminary	0		Evangelical_University_of_Parana	0		East_Tennessee_State	0		Dibrugarh_University	0		Evangelical_University_of_Parana	0		Eastern_Virginia_Medical_School	0		Ewha_Women's_University	0		Gardner-Webb_University	0
Free_University_Berlin	0		Dankook_University	0		ENSAE_ParisTech	0		East_Carolina	0		Chamberlain_University-Illinois	0		Davao_Medical_School	0		Federal_University_of_Uberlandia	0		Fujian_Agriculture_and_Forestry_University	0		Eastern_Michigan	0		Columbia_University_Medical_Center	0		Ewha_Women's_University	0		East_Texas_State_University	0		Dokuz_Eylul_University	0		Ewha_Women's_University	0		Ecole_Centrale_de_Lille	0		Fachhochschule_of_Tech_Wurzburg	0		Gauhati_University_Gauhati	0
Friedrich-Alexander_University_of_Erlangen-Nurnberg	0		Davao_Medical_School	0		Eotvos_Lorand_University	0		East_China_Normal_University	0		Changchun_University	0		Dayanand_Medical_College	0		Federal_University_of_Vicosa	0		Fujian_Medical_University	0		Eastern_Virginia_Medical_School	0		Comenius_University	0		Fachhochschule_of_Tech_Wurzburg	0		Eastern_Michigan	0		Dominion_University_Urban	0		Fachhochschule_of_Tech_Wurzburg	0		Ecole_Centrale_Lyon	0		Faculdade_de_Ciencias_Agrarias_do_Planalto_Central	0		Gazi_Üniversitesi	0
Friedrich-Schiller_University_of_Jena	0		Dayanand_Medical_College	0		Erasmus_University_Medical_Center	0		East_China_University_of_Science_and_Technology	0		Chapman_University	0		De_Montfort_University	0		Ferris_State_University	0		Fujita_Health_University	0		Ecole_Centrale_de_Lille	0		Concordia_University-Chicago	0		Faculdade_de_Ciencias_Agrarias_do_Planalto_Central	0		Eastern_Virginia_Medical_School	0		Donetsk_National_Technical_University	0		Faculdade_de_Ciencias_Agrarias_do_Planalto_Central	0		Ecole_National_Veterinaire_de_Lyon	0		Faculte_des_Sciences_de_Luminy	0		Gdansk_Medical_University	0
Frontier_Nursing_University	0		De_Montfort_University	0		Erasmus_University_Rotterdam	0		East_Tennessee_State	0		Charite_University_Medicine	0		Deakin_University	0		Fielding_Graduate	0		Fukui_Medical_University_of_Japan	0		Ecole_Centrale_Lyon	0		Corvinus_University_of_Budapest	0		Faculte_des_Sciences_de_Luminy	0		Ecole_Centrale_de_Lille	0		Dongguk_University	0		Faculte_des_Sciences_de_Luminy	0		Ecole_Nationale_Superieure_des_Telecommunications	0		Fairleigh_Dickinson	0		George_Fox_University	0
Frumkin_Institute_of_Electrochemistry	0		Deakin_University	0		Erciyes_University	0		East_Texas_State_University	0		Charles_University_in_Prague	0		Defence_Research_and_Development_Establishment	0		Finch_University	0		Fukushima_Medical_University	0		Ecole_National_Veterinaire_de_Lyon	0		Council_of_Scientific_and_Industrial_Research	0		Fairleigh_Dickinson	0		Ecole_Centrale_Lyon	0		Dow_Medical_College	0		Fairleigh_Dickinson	0		Ecole_Nationale_Veterinaire_d'Alfort	0		Far_Eastern_Federal_University	0		George_Mason	0
Fudan_University	0		Defence_Research_and_Development_Establishment	0		Escola_Paulista_de_Medicina	0		Eastern_Michigan	0		Chatham_University	0		Delft_University_of_Technology	0		Finch_University_of_Health_Sciences_Chicago	0		Fuller_Graduate_School_of_Psychology_Pasadena_CA	0		Ecole_Nationale_Superieure_des_Telecommunications	0		Courant_Institute_of_Mathematical_Sciences	0		Far_Eastern_Federal_University	0		Ecole_National_Veterinaire_de_Lyon	0		Dowling_College	0		Far_Eastern_Federal_University	0		Ecole_Normale_Superieure	0		Far_Eastern_University_Philippines	0		George_Washington	0
Fujian_Agriculture_and_Forestry_University	0		Delft_University_of_Technology	0		ETH_Zurich	0		Eastern_Virginia_Medical_School	0		Chaudhary_Charan_Singh_University	0		Delta_State_University	0		First_Medical_School_University_of_Naples	0		Fuller_Theological_Seminary	0		Ecole_Nationale_Veterinaire_d'Alfort	0		Coventry_University	0		Far_Eastern_University_Philippines	0		Ecole_Nationale_Superieure_des_Telecommunications	0		Drake_University	0		Far_Eastern_University_Philippines	0		Ecole_Normale_Superieure_Paris-Saclay	0		Fatima_Jinnah_Medical_College	0		Georgetown	0
Fujian_Medical_University	0		Delta_State_University	0		Eurotechnical_Research_University	0		Ecole_Centrale_de_Lille	0		Chemnitz_University_of_Technology	0		Des_Moines_University	0		First_Moscow_State_Medical_University	0		Gabrichevsky_Research_Institute_of_Epidemiology_and_Microbiology	0		Ecole_Normale_Superieure	0		Cracow_University	0		Fatima_Jinnah_Medical_College	0		Ecole_Nationale_Veterinaire_d'Alfort	0		Drew	0		Fatima_Jinnah_Medical_College	0		Ecole_Polytechnique_Federale_de_Lausanne	0		Favaloro_University	0		Georgia_College_and_State_University	0
Fujita_Health_University	0		DePaul	0		Evangelical_University_of_Parana	0		Ecole_Centrale_Lyon	0		Chestnut_Hill_College	0		Deutsches_Elektronen-Synchrotron	0		Flinders_University	0		Gajra_Raja_Medical_College	0		Ecole_Normale_Superieure_Paris-Saclay	0		Creighton	0		Favaloro_University	0		Ecole_Normale_Superieure	0		Dropsie_College	0		Favaloro_University	0		Edinburgh_Napier_University	0		Fayetteville_State_University	0		Georgia_Southern	0
Fukui_Medical_University_of_Japan	0		Des_Moines_University	0		Ewha_Women's_University	0		Ecole_National_Veterinaire_de_Lyon	0		Chiang_Mai_University	0		Devi_Ahilya_University	0		Florida_A&M	0		Gallaudet	0		Ecole_Polytechnique_Federale_de_Lausanne	0		Cukurova_University	0		Fayetteville_State_University	0		Ecole_Normale_Superieure_Paris-Saclay	0		Dublin_City_University	0		Fayetteville_State_University	0		Edith_Cowan_University	0		Federal_University_of_Ceara	0		Georgia_State	0
Fukushima_Medical_University	0		Deutsches_Elektronen-Synchrotron	0		Fachhochschule_of_Tech_Wurzburg	0		Ecole_Nationale_Superieure_des_Telecommunications	0		Chiba_University	0		Dibrugarh_University	0		Florida_Atlantic	0		Gandhi_Medical_College_Hyderabad_India	0		Edinburgh_Napier_University	0		Curie_Institute_Paris	0		Federal_University_of_Ceara	0		Ecole_Polytechnique_Federale_de_Lausanne	0		Durham_University	0		Federal_University_of_Ceara	0		Edward_Via_College_of_Osteopathic_Medicine	0		Federal_University_of_Espírito_Santo	0		Georgia_Tech	0
Fuller_Graduate_School_of_Psychology_Pasadena_CA	0		Devi_Ahilya_University	0		Faculdade_de_Ciencias_Agrarias_do_Planalto_Central	0		Ecole_Nationale_Veterinaire_d'Alfort	0		Chicago_College_of_Osteopathic_Medicine	0		Dokuz_Eylul_University	0		Florida_Institute_of_Technology	0		Ganesh_Shankar_Vidyarthi_Memorial_Medical_College	0		Edith_Cowan_University	0		Curtin_University	0		Federal_University_of_Espírito_Santo	0		Edinburgh_Napier_University	0		East_Carolina	0		Federal_University_of_Espírito_Santo	0		Ege_University	0		Federal_University_of_Goias	0		Georgian_Academy_of_Sciences	0
Fuller_Theological_Seminary	0		Dibrugarh_University	0		Faculte_des_Sciences_de_Luminy	0		Ecole_Normale_Superieure	0		Chicago_Medical_School_Chicago_IL	0		Dominion_University_Urban	0		Florida_International	0		Gardner-Webb_University	0		Edward_Via_College_of_Osteopathic_Medicine	0		Daemen_College	0		Federal_University_of_Goias	0		Edith_Cowan_University	0		East_China_Normal_University	0		Federal_University_of_Goias	0		Ehime_University	0		Federal_University_of_Juiz_de_Fora	0		German_Sport_University	0
Gabrichevsky_Research_Institute_of_Epidemiology_and_Microbiology	0		Dokuz_Eylul_University	0		Fairleigh_Dickinson	0		Ecole_Normale_Superieure_Paris-Saclay	0		Chicago_School_of_Professional_Psychology_Chicago_Campus	0		Donetsk_National_Technical_University	0		Fordham	0		Gauhati_University_Gauhati	0		Ege_University	0		Dagestan_Medical_Academy	0		Federal_University_of_Juiz_de_Fora	0		Edward_Via_College_of_Osteopathic_Medicine	0		East_China_University_of_Science_and_Technology	0		Federal_University_of_Juiz_de_Fora	0		EIM_Institute_of_Health_Professions	0		Federal_University_of_Mato_Grosso_do_Sul	0		Gestalt_Institute	0
Gajra_Raja_Medical_College	0		Dominion_University_Urban	0		Far_Eastern_Federal_University	0		Ecole_Polytechnique_Federale_de_Lausanne	0		Chicago_School_of_Professional_Psychology_LA_Campus	0		Dongguk_University	0		Fourth_Military_Medical_University	0		Gazi_Üniversitesi	0		Ehime_University	0		Dalhousie_University	0		Federal_University_of_Mato_Grosso_do_Sul	0		Ege_University	0		East_Tennessee_State	0		Federal_University_of_Mato_Grosso_do_Sul	0		Eindhoven_University_of_Technology	0		Federal_University_of_Pernambuco	0		Ghent_University	0
Gallaudet	0		Donetsk_National_Technical_University	0		Far_Eastern_University_Philippines	0		Edinburgh_Napier_University	0		China_Agricultural_University	0		Dow_Medical_College	0		Francois_Rabelais_University	0		Gdansk_Medical_University	0		EIM_Institute_of_Health_Professions	0		Dalian_Institute_of_Chemical_Physics	0		Federal_University_of_Pernambuco	0		Ehime_University	0		East_Texas_State_University	0		Federal_University_of_Pernambuco	0		Elon_University	0		Federal_University_of_Rio_de_Janeiro	0		Gifu_University	0
Gandhi_Medical_College_Hyderabad_India	0		Dongguk_University	0		Fatima_Jinnah_Medical_College	0		Edith_Cowan_University	0		China_Medical_University	0		Dowling_College	0		Franklin_Pierce_Law_Center	0		George_Fox_University	0		Eindhoven_University_of_Technology	0		Dalian_Medical_University	0		Federal_University_of_Rio_de_Janeiro	0		EIM_Institute_of_Health_Professions	0		Eastern_Michigan	0		Federal_University_of_Rio_de_Janeiro	0		Engelhardt_Institute_of_Molecular_Biology	0		Federal_University_of_Rio_Grande_do_Norte	0		Glasgow_Caledonian_University	0
Ganesh_Shankar_Vidyarthi_Memorial_Medical_College	0		Dow_Medical_College	0		Favaloro_University	0		Edward_Via_College_of_Osteopathic_Medicine	0		China_Pharmaceutical_University_Nanjing	0		Drake_University	0		Free_University_Berlin	0		George_Mason	0		Elon_University	0		Dalian_University_of_Technology	0		Federal_University_of_Rio_Grande_do_Norte	0		Eindhoven_University_of_Technology	0		Eastern_Virginia_Medical_School	0		Federal_University_of_Rio_Grande_do_Norte	0		ENSAE_ParisTech	0		Federal_University_of_Rio_Grande_do_Sul	0		Goa_Medical_College	0
Gardner-Webb_University	0		Dowling_College	0		Fayetteville_State_University	0		Ege_University	0		China-National_University_of_Singapore	0		Drew	0		Freie_University_of_Berlin	0		Georgetown	0		Engelhardt_Institute_of_Molecular_Biology	0		Damascus_University	0		Federal_University_of_Rio_Grande_do_Sul	0		Elon_University	0		Ecole_Centrale_de_Lille	0		Federal_University_of_Rio_Grande_do_Sul	0		Eotvos_Lorand_University	0		Federal_University_of_Santa_Catarina	0		Goethe_University_Frankfurt	0
Gauhati_University_Gauhati	0		Drake_University	0		Federal_University_of_Ceara	0		Ehime_University	0		Chinese_Academy_of_Preventative_Medicine	0		Dropsie_College	0		Friedrich-Schiller_University_of_Jena	0		Georgia_College_and_State_University	0		ENSAE_ParisTech	0		Dankook_University	0		Federal_University_of_Santa_Catarina	0		Engelhardt_Institute_of_Molecular_Biology	0		Ecole_Centrale_Lyon	0		Federal_University_of_Santa_Catarina	0		Erasmus_University_Medical_Center	0		Federal_University_of_Santa_Maria	0		Golden_Gate_University	0
Gazi_Üniversitesi	0		Drew	0		Federal_University_of_Espírito_Santo	0		EIM_Institute_of_Health_Professions	0		Chinese_Center_for_Disease_Control_and_Prevention	0		Dublin_City_University	0		Frontier_Nursing_University	0		Georgia_Southern	0		Eotvos_Lorand_University	0		Davao_Medical_School	0		Federal_University_of_Santa_Maria	0		ENSAE_ParisTech	0		Ecole_National_Veterinaire_de_Lyon	0		Federal_University_of_Santa_Maria	0		Erasmus_University_Rotterdam	0		Federal_University_of_Sao_Paulo	0		Gonzaga	0
Gdansk_Medical_University	0		Drexel	0		Federal_University_of_Juiz_de_Fora	0		Eindhoven_University_of_Technology	0		Chittaranjan_National_Cancer_Institute	0		Duquesne	0		Frumkin_Institute_of_Electrochemistry	0		Georgia_State	0		Erasmus_University_Medical_Center	0		Dayanand_Medical_College	0		Federal_University_of_Sao_Paulo	0		Eotvos_Lorand_University	0		Ecole_Nationale_Superieure_des_Telecommunications	0		Federal_University_of_Sao_Paulo	0		Erciyes_University	0		Federal_University_of_Uberlandia	0		Gorakhpur_University	0
George_Fox_University	0		Dropsie_College	0		Federal_University_of_Mato_Grosso_do_Sul	0		Elon_University	0		Chongqing_Medical_University	0		Durham_University	0		Fudan_University	0		Georgian_Academy_of_Sciences	0		Erciyes_University	0		De_Montfort_University	0		Federal_University_of_Uberlandia	0		Erasmus_University_Medical_Center	0		Ecole_Nationale_Veterinaire_d'Alfort	0		Federal_University_of_Uberlandia	0		Escola_Paulista_de_Medicina	0		Federal_University_of_Vicosa	0		Government_Medical_College	0
George_Mason	0		Dublin_City_University	0		Federal_University_of_Pernambuco	0		Engelhardt_Institute_of_Molecular_Biology	0		Chongqing_University	0		East_Carolina	0		Fujian_Agriculture_and_Forestry_University	0		German_Sport_University	0		Escola_Paulista_de_Medicina	0		Deakin_University	0		Federal_University_of_Vicosa	0		Escola_Paulista_de_Medicina	0		Ecole_Normale_Superieure	0		Federal_University_of_Vicosa	0		ETH_Zurich	0		Ferris_State_University	0		Government_Medical_College_Chandigarh_Punjab_University	0
George_Washington	0		Duquesne	0		Federal_University_of_Rio_de_Janeiro	0		ENSAE_ParisTech	0		Chonnam_National_University	0		East_China_Normal_University	0		Fujian_Medical_University	0		Gestalt_Institute	0		ETH_Zurich	0		Defence_Research_and_Development_Establishment	0		Ferris_State_University	0		ETH_Zurich	0		Ecole_Normale_Superieure_Paris-Saclay	0		Ferris_State_University	0		European_Molecular_Biology_Laboratory	0		Fielding_Graduate	0		Government_Medical_College_Gulbarga_University_India	0
Georgia_College_and_State_University	0		East_China_Normal_University	0		Federal_University_of_Rio_Grande_do_Norte	0		Eotvos_Lorand_University	0		Christian_Medical_College	0		East_China_University_of_Science_and_Technology	0		Fujita_Health_University	0		Ghent_University	0		European_Molecular_Biology_Laboratory	0		Delft_University_of_Technology	0		Fielding_Graduate	0		European_Molecular_Biology_Laboratory	0		Ecole_Polytechnique_Federale_de_Lausanne	0		Fielding_Graduate	0		Eurotechnical_Research_University	0		Finch_University	0		Government_Medical_College_Guru_Nanak_Dev_University_Amritsar_India	0
Georgia_Southern	0		East_China_University_of_Science_and_Technology	0		Federal_University_of_Rio_Grande_do_Sul	0		Erasmus_University_Medical_Center	0		Christian-Albrechts_University_at_Kiel	0		East_Tennessee_State	0		Fukui_Medical_University_of_Japan	0		Gifu_University	0		Eurotechnical_Research_University	0		Delta_State_University	0		Finch_University	0		Eurotechnical_Research_University	0		Edinburgh_Napier_University	0		Finch_University	0		Evangelical_University_of_Parana	0		Finch_University_of_Health_Sciences_Chicago	0		Government_Medical_College_Mysore_University_India	0
Georgia_State	0		East_Tennessee_State	0		Federal_University_of_Santa_Catarina	0		Erasmus_University_Rotterdam	0		Christie_Hospital_Manchester	0		East_Texas_State_University	0		Fukushima_Medical_University	0		Glasgow_Caledonian_University	0		Evangelical_University_of_Parana	0		DePaul	0		Finch_University_of_Health_Sciences_Chicago	0		Evangelical_University_of_Parana	0		Edith_Cowan_University	0		Finch_University_of_Health_Sciences_Chicago	0		Ewha_Women's_University	0		First_Medical_School_University_of_Naples	0		Government_Medical_College_Patiala	0
Georgia_Tech	0		East_Texas_State_University	0		Federal_University_of_Santa_Maria	0		Erciyes_University	0		Chung-Ang_University	0		Eastern_Michigan	0		Fuller_Graduate_School_of_Psychology_Pasadena_CA	0		Goa_Medical_College	0		Ewha_Women's_University	0		Des_Moines_University	0		First_Medical_School_University_of_Naples	0		Ewha_Women's_University	0		Edward_Via_College_of_Osteopathic_Medicine	0		First_Medical_School_University_of_Naples	0		Fachhochschule_of_Tech_Wurzburg	0		First_Moscow_State_Medical_University	0		Government_Medical_College_Srinagar_Jammu_and_Kashmir_India	0
Georgian_Academy_of_Sciences	0		Eastern_Michigan	0		Federal_University_of_Sao_Paulo	0		Escola_Paulista_de_Medicina	0		Chungnam_National_University	0		Eastern_Virginia_Medical_School	0		Fuller_Theological_Seminary	0		Goethe_University_Frankfurt	0		Fachhochschule_of_Tech_Wurzburg	0		Deutsches_Elektronen-Synchrotron	0		First_Moscow_State_Medical_University	0		Fachhochschule_of_Tech_Wurzburg	0		Ege_University	0		First_Moscow_State_Medical_University	0		Faculdade_de_Ciencias_Agrarias_do_Planalto_Central	0		Flinders_University	0		Governors_State_University	0
German_Sport_University	0		Eastern_Virginia_Medical_School	0		Federal_University_of_Uberlandia	0		European_Molecular_Biology_Laboratory	0		Cinvestav	0		Ecole_Centrale_de_Lille	0		Gabrichevsky_Research_Institute_of_Epidemiology_and_Microbiology	0		Golden_Gate_University	0		Faculdade_de_Ciencias_Agrarias_do_Planalto_Central	0		Devi_Ahilya_University	0		Flinders_University	0		Faculdade_de_Ciencias_Agrarias_do_Planalto_Central	0		Ehime_University	0		Flinders_University	0		Faculte_des_Sciences_de_Luminy	0		Florida_A&M	0		Graduate_School_and_University_Center_(CUNY)	0
Gestalt_Institute	0		Ecole_Centrale_de_Lille	0		Federal_University_of_Vicosa	0		Eurotechnical_Research_University	0		City_College_(CUNY)	0		Ecole_Centrale_Lyon	0		Gajra_Raja_Medical_College	0		Gonzaga	0		Faculte_des_Sciences_de_Luminy	0		Dibrugarh_University	0		Florida_A&M	0		Faculte_des_Sciences_de_Luminy	0		EIM_Institute_of_Health_Professions	0		Florida_Institute_of_Technology	0		Fairleigh_Dickinson	0		Florida_Atlantic	0		Graduate_School_of_Chinese_Academy_of_Agriculture_Science	0
Ghent_University	0		Ecole_Centrale_Lyon	0		Ferris_State_University	0		Evangelical_University_of_Parana	0		City_of_Hope_Graduate_School	0		Ecole_National_Veterinaire_de_Lyon	0		Gallaudet	0		Gorakhpur_University	0		Fairleigh_Dickinson	0		Dokuz_Eylul_University	0		Florida_Atlantic	0		Fairleigh_Dickinson	0		Eindhoven_University_of_Technology	0		Florida_International	0		Far_Eastern_Federal_University	0		Florida_Institute_of_Technology	0		Graduate_Theological_Union	0
Gifu_University	0		Ecole_National_Veterinaire_de_Lyon	0		Fielding_Graduate	0		Ewha_Women's_University	0		City_of_Hope_National_Medical_Center	0		Ecole_Nationale_Superieure_des_Telecommunications	0		Gandhi_Medical_College_Hyderabad_India	0		Government_Medical_College	0		Far_Eastern_Federal_University	0		Dominion_University_Urban	0		Florida_Institute_of_Technology	0		Far_Eastern_Federal_University	0		Elon_University	0		Florida_State	0		Far_Eastern_University_Philippines	0		Florida_International	0		Grambling_State_University	0
Glasgow_Caledonian_University	0		Ecole_Nationale_Superieure_des_Telecommunications	0		Finch_University	0		Fachhochschule_of_Tech_Wurzburg	0		City_of_London_Polytechnic	0		Ecole_Nationale_Veterinaire_d'Alfort	0		Ganesh_Shankar_Vidyarthi_Memorial_Medical_College	0		Government_Medical_College_Chandigarh_Punjab_University	0		Far_Eastern_University_Philippines	0		Donetsk_National_Technical_University	0		Florida_International	0		Far_Eastern_University_Philippines	0		Engelhardt_Institute_of_Molecular_Biology	0		Fordham	0		Fatima_Jinnah_Medical_College	0		Fordham	0		Grand_Canyon_University	0
Goa_Medical_College	0		Ecole_Nationale_Veterinaire_d'Alfort	0		Finch_University_of_Health_Sciences_Chicago	0		Faculdade_de_Ciencias_Agrarias_do_Planalto_Central	0		City_University_of_Hong_Kong	0		Ecole_Normale_Superieure_Paris-Saclay	0		Gardner-Webb_University	0		Government_Medical_College_Gulbarga_University_India	0		Fatima_Jinnah_Medical_College	0		Dongguk_University	0		Fordham	0		Fatima_Jinnah_Medical_College	0		ENSAE_ParisTech	0		Fourth_Military_Medical_University	0		Favaloro_University	0		Fourth_Military_Medical_University	0		Grant_Medical_College_and_Sir_JJ_Group_of_Hospitals	0
Goethe_University_Frankfurt	0		Ecole_Normale_Superieure	0		First_Medical_School_University_of_Naples	0		Faculte_des_Sciences_de_Luminy	0		City_University_of_New_York_The	0		Edinburgh_Napier_University	0		Gauhati_University_Gauhati	0		Government_Medical_College_Guru_Nanak_Dev_University_Amritsar_India	0		Favaloro_University	0		Dow_Medical_College	0		Fourth_Military_Medical_University	0		Favaloro_University	0		Eotvos_Lorand_University	0		Francois_Rabelais_University	0		Fayetteville_State_University	0		Francois_Rabelais_University	0		Graz_University_of_Technology	0
Golden_Gate_University	0		Ecole_Normale_Superieure_Paris-Saclay	0		First_Moscow_State_Medical_University	0		Fairleigh_Dickinson	0		Claremont_Graduate	0		Edith_Cowan_University	0		Gazi_Üniversitesi	0		Government_Medical_College_Mysore_University_India	0		Fayetteville_State_University	0		Dowling_College	0		Francois_Rabelais_University	0		Fayetteville_State_University	0		Erasmus_University_Medical_Center	0		Franklin_Pierce_Law_Center	0		Federal_University_of_Ceara	0		Franklin_Pierce_Law_Center	0		Grenoble_Institute_of_Technology	0
Gonzaga	0		Ecole_Polytechnique_Federale_de_Lausanne	0		Flinders_University	0		Far_Eastern_Federal_University	0		Clarkson	0		Edward_Via_College_of_Osteopathic_Medicine	0		Gdansk_Medical_University	0		Government_Medical_College_Patiala	0		Federal_University_of_Ceara	0		Drake_University	0		Franklin_Pierce_Law_Center	0		Federal_University_of_Ceara	0		Erasmus_University_Rotterdam	0		Free_University_Berlin	0		Federal_University_of_Espírito_Santo	0		Free_University_Berlin	0		Griffith_University	0
Gorakhpur_University	0		Edinburgh_Napier_University	0		Florida_A&M	0		Far_Eastern_University_Philippines	0		Clarkson_College	0		Ege_University	0		George_Fox_University	0		Government_Medical_College_Srinagar_Jammu_and_Kashmir_India	0		Federal_University_of_Espírito_Santo	0		Drew	0		Free_University_Berlin	0		Federal_University_of_Espírito_Santo	0		Erciyes_University	0		Freie_University_of_Berlin	0		Federal_University_of_Goias	0		Freie_University_of_Berlin	0		Grigore_T_Popa_University_of_Medicine_and_Pharmacy	0
Government_Medical_College	0		Edith_Cowan_University	0		Florida_Atlantic	0		Favaloro_University	0		Clemson	0		Ehime_University	0		George_Mason	0		Governors_State_University	0		Federal_University_of_Goias	0		Drexel	0		Friedrich-Schiller_University_of_Jena	0		Federal_University_of_Goias	0		Escola_Paulista_de_Medicina	0		Friedrich-Alexander_University_of_Erlangen-Nurnberg	0		Federal_University_of_Juiz_de_Fora	0		Friedrich-Alexander_University_of_Erlangen-Nurnberg	0		Guangxi_Medical_University	0
Government_Medical_College_Chandigarh_Punjab_University	0		Edward_Via_College_of_Osteopathic_Medicine	0		Florida_Institute_of_Technology	0		Fayetteville_State_University	0		Cleveland_Clinic	0		EIM_Institute_of_Health_Professions	0		George_Washington	0		Graduate_School_and_University_Center_(CUNY)	0		Federal_University_of_Juiz_de_Fora	0		Dropsie_College	0		Frontier_Nursing_University	0		Federal_University_of_Juiz_de_Fora	0		European_Molecular_Biology_Laboratory	0		Friedrich-Schiller_University_of_Jena	0		Federal_University_of_Mato_Grosso_do_Sul	0		Friedrich-Schiller_University_of_Jena	0		Guangzhou_Medical_University	0
Government_Medical_College_Gulbarga_University_India	0		Ege_University	0		Florida_International	0		Federal_University_of_Ceara	0		Cleveland-Marshall_College_of_Law	0		Eindhoven_University_of_Technology	0		Georgetown	0		Graduate_School_of_Chinese_Academy_of_Agriculture_Science	0		Federal_University_of_Mato_Grosso_do_Sul	0		Dublin_City_University	0		Frumkin_Institute_of_Electrochemistry	0		Federal_University_of_Mato_Grosso_do_Sul	0		Eurotechnical_Research_University	0		Frontier_Nursing_University	0		Federal_University_of_Pernambuco	0		Frontier_Nursing_University	0		Guangzhou_University_of_Chinese_Medicine	0
Government_Medical_College_Guru_Nanak_Dev_University_Amritsar_India	0		Ehime_University	0		Florida_State	0		Federal_University_of_Espírito_Santo	0		CNRS_Gif-sur-Yvette	0		Elon_University	0		Georgia_College_and_State_University	0		Graduate_Theological_Union	0		Federal_University_of_Pernambuco	0		Durham_University	0		Fudan_University	0		Federal_University_of_Pernambuco	0		Evangelical_University_of_Parana	0		Frumkin_Institute_of_Electrochemistry	0		Federal_University_of_Rio_de_Janeiro	0		Frumkin_Institute_of_Electrochemistry	0		Gujarat_University	0
Government_Medical_College_Mysore_University_India	0		EIM_Institute_of_Health_Professions	0		Fordham	0		Federal_University_of_Goias	0		Cochin_University_of_Science_and_Technology_in_india	0		Engelhardt_Institute_of_Molecular_Biology	0		Georgia_Southern	0		Grambling_State_University	0		Federal_University_of_Rio_de_Janeiro	0		East_China_Normal_University	0		Fujian_Agriculture_and_Forestry_University	0		Federal_University_of_Rio_de_Janeiro	0		Ewha_Women's_University	0		Fudan_University	0		Federal_University_of_Rio_Grande_do_Norte	0		Fudan_University	0		Gulhane_Military_Medical_School	0
Government_Medical_College_Patiala	0		Eindhoven_University_of_Technology	0		Fourth_Military_Medical_University	0		Federal_University_of_Juiz_de_Fora	0		Cold_Spring_Harbor	0		ENSAE_ParisTech	0		Georgian_Academy_of_Sciences	0		Grand_Canyon_University	0		Federal_University_of_Rio_Grande_do_Norte	0		East_China_University_of_Science_and_Technology	0		Fujian_Medical_University	0		Federal_University_of_Rio_Grande_do_Norte	0		Fachhochschule_of_Tech_Wurzburg	0		Fujian_Agriculture_and_Forestry_University	0		Federal_University_of_Santa_Catarina	0		Fujian_Agriculture_and_Forestry_University	0		Gunma_University	0
Government_Medical_College_Srinagar_Jammu_and_Kashmir_India	0		Elon_University	0		Francois_Rabelais_University	0		Federal_University_of_Mato_Grosso_do_Sul	0		College_de_France	0		Eotvos_Lorand_University	0		German_Sport_University	0		Grant_Medical_College_and_Sir_JJ_Group_of_Hospitals	0		Federal_University_of_Rio_Grande_do_Sul	0		East_Tennessee_State	0		Fujita_Health_University	0		Federal_University_of_Rio_Grande_do_Sul	0		Faculdade_de_Ciencias_Agrarias_do_Planalto_Central	0		Fujian_Medical_University	0		Federal_University_of_Santa_Maria	0		Fujian_Medical_University	0		Guntur_Medical_College	0
Governors_State_University	0		Engelhardt_Institute_of_Molecular_Biology	0		Franklin_Pierce_Law_Center	0		Federal_University_of_Pernambuco	0		College_of_Physicians_and_Surgeons_of_Ontario	0		Erasmus_University_Medical_Center	0		Gestalt_Institute	0		Graz_University_of_Technology	0		Federal_University_of_Santa_Catarina	0		East_Texas_State_University	0		Fukui_Medical_University_of_Japan	0		Federal_University_of_Santa_Catarina	0		Faculte_des_Sciences_de_Luminy	0		Fujita_Health_University	0		Federal_University_of_Sao_Paulo	0		Fujita_Health_University	0		Guru_Nanak_Dev_University	0
Graduate_School_and_University_Center_(CUNY)	0		ENSAE_ParisTech	0		Friedrich-Schiller_University_of_Jena	0		Federal_University_of_Rio_de_Janeiro	0		College_of_Saint_Mary	0		Erciyes_University	0		Ghent_University	0		Grenoble_Institute_of_Technology	0		Federal_University_of_Santa_Maria	0		Eastern_Michigan	0		Fukushima_Medical_University	0		Federal_University_of_Santa_Maria	0		Fairleigh_Dickinson	0		Fukui_Medical_University_of_Japan	0		Federal_University_of_Uberlandia	0		Fukui_Medical_University_of_Japan	0		Gyeongsang_National_University	0
Graduate_School_of_Chinese_Academy_of_Agriculture_Science	0		Eotvos_Lorand_University	0		Frumkin_Institute_of_Electrochemistry	0		Federal_University_of_Rio_Grande_do_Norte	0		College_of_Saint_Scholastica	0		Escola_Paulista_de_Medicina	0		Gifu_University	0		Griffith_University	0		Federal_University_of_Sao_Paulo	0		Ecole_Centrale_de_Lille	0		Fuller_Graduate_School_of_Psychology_Pasadena_CA	0		Federal_University_of_Sao_Paulo	0		Far_Eastern_Federal_University	0		Fukushima_Medical_University	0		Federal_University_of_Vicosa	0		Fukushima_Medical_University	0		Hacettepe_University	0
Graduate_Theological_Union	0		Erasmus_University_Medical_Center	0		Fudan_University	0		Federal_University_of_Rio_Grande_do_Sul	0		Colombian_School_of_Odontology	0		ETH_Zurich	0		Glasgow_Caledonian_University	0		Grigore_T_Popa_University_of_Medicine_and_Pharmacy	0		Federal_University_of_Uberlandia	0		Ecole_Centrale_Lyon	0		Fuller_Theological_Seminary	0		Federal_University_of_Uberlandia	0		Far_Eastern_University_Philippines	0		Fuller_Graduate_School_of_Psychology_Pasadena_CA	0		Ferris_State_University	0		Fuller_Graduate_School_of_Psychology_Pasadena_CA	0		Hadassah_Medical_School	0
Grambling_State_University	0		Erciyes_University	0		Fujian_Agriculture_and_Forestry_University	0		Federal_University_of_Santa_Catarina	0		Colorado_College	0		European_Molecular_Biology_Laboratory	0		Goa_Medical_College	0		Guangxi_Medical_University	0		Federal_University_of_Vicosa	0		Ecole_National_Veterinaire_de_Lyon	0		Gabrichevsky_Research_Institute_of_Epidemiology_and_Microbiology	0		Federal_University_of_Vicosa	0		Fatima_Jinnah_Medical_College	0		Fuller_Theological_Seminary	0		Fielding_Graduate	0		Fuller_Theological_Seminary	0		Hahnemann_Medical_College_Philadelphia	0
Grand_Canyon_University	0		Escola_Paulista_de_Medicina	0		Fujian_Medical_University	0		Federal_University_of_Santa_Maria	0		Colorado_School_of_Mines	0		Eurotechnical_Research_University	0		Goethe_University_Frankfurt	0		Guangzhou_Medical_University	0		Ferris_State_University	0		Ecole_Nationale_Superieure_des_Telecommunications	0		Gajra_Raja_Medical_College	0		Ferris_State_University	0		Favaloro_University	0		Gabrichevsky_Research_Institute_of_Epidemiology_and_Microbiology	0		Finch_University	0		Gabrichevsky_Research_Institute_of_Epidemiology_and_Microbiology	0		Hahnemann_University_Hospital	0
Grant_Medical_College_and_Sir_JJ_Group_of_Hospitals	0		European_Molecular_Biology_Laboratory	0		Fujita_Health_University	0		Federal_University_of_Sao_Paulo	0		Colorado_State	0		Evangelical_University_of_Parana	0		Golden_Gate_University	0		Guangzhou_University_of_Chinese_Medicine	0		Fielding_Graduate	0		Ecole_Nationale_Veterinaire_d'Alfort	0		Gallaudet	0		Fielding_Graduate	0		Fayetteville_State_University	0		Gajra_Raja_Medical_College	0		First_Medical_School_University_of_Naples	0		Gajra_Raja_Medical_College	0		Hallym_University	0
Graz_University_of_Technology	0		Eurotechnical_Research_University	0		Fukui_Medical_University_of_Japan	0		Federal_University_of_Uberlandia	0		Colorado_Technical_University	0		Ewha_Women's_University	0		Gonzaga	0		Gujarat_University	0		Finch_University	0		Ecole_Normale_Superieure	0		Gandhi_Medical_College_Hyderabad_India	0		Finch_University	0		Federal_University_of_Ceara	0		Gallaudet	0		First_Moscow_State_Medical_University	0		Gallaudet	0		Hamamatsu_University	0
Grenoble_Institute_of_Technology	0		Evangelical_University_of_Parana	0		Fukushima_Medical_University	0		Federal_University_of_Vicosa	0		Columbia_Pacific_University	0		Fachhochschule_of_Tech_Wurzburg	0		Gorakhpur_University	0		Gulhane_Military_Medical_School	0		Finch_University_of_Health_Sciences_Chicago	0		Ecole_Normale_Superieure_Paris-Saclay	0		Ganesh_Shankar_Vidyarthi_Memorial_Medical_College	0		Finch_University_of_Health_Sciences_Chicago	0		Federal_University_of_Espírito_Santo	0		Gandhi_Medical_College_Hyderabad_India	0		Flinders_University	0		Gandhi_Medical_College_Hyderabad_India	0		Hamburg_University_of_Technology	0
Griffith_University	0		Ewha_Women's_University	0		Fuller_Graduate_School_of_Psychology_Pasadena_CA	0		Ferris_State_University	0		Columbia_Theological_Seminary	0		Faculdade_de_Ciencias_Agrarias_do_Planalto_Central	0		Government_Medical_College	0		Gunma_University	0		First_Medical_School_University_of_Naples	0		Ecole_Polytechnique_Federale_de_Lausanne	0		Gardner-Webb_University	0		First_Medical_School_University_of_Naples	0		Federal_University_of_Goias	0		Ganesh_Shankar_Vidyarthi_Memorial_Medical_College	0		Florida_A&M	0		Ganesh_Shankar_Vidyarthi_Memorial_Medical_College	0		Hamline_University	0
Grigore_T_Popa_University_of_Medicine_and_Pharmacy	0		Fachhochschule_of_Tech_Wurzburg	0		Fuller_Theological_Seminary	0		Fielding_Graduate	0		Columbia_University_Medical_Center	0		Faculte_des_Sciences_de_Luminy	0		Government_Medical_College_Chandigarh_Punjab_University	0		Guntur_Medical_College	0		First_Moscow_State_Medical_University	0		Edinburgh_Napier_University	0		Gauhati_University_Gauhati	0		First_Moscow_State_Medical_University	0		Federal_University_of_Juiz_de_Fora	0		Gardner-Webb_University	0		Florida_Atlantic	0		Gardner-Webb_University	0		Hampton	0
Guangxi_Medical_University	0		Faculdade_de_Ciencias_Agrarias_do_Planalto_Central	0		Gabrichevsky_Research_Institute_of_Epidemiology_and_Microbiology	0		Finch_University	0		Comenius_University	0		Fairleigh_Dickinson	0		Government_Medical_College_Gulbarga_University_India	0		Guru_Nanak_Dev_University	0		Flinders_University	0		Edith_Cowan_University	0		Gazi_Üniversitesi	0		Flinders_University	0		Federal_University_of_Mato_Grosso_do_Sul	0		Gauhati_University_Gauhati	0		Florida_Institute_of_Technology	0		Gauhati_University_Gauhati	0		Hannover_Medical_School_Hannover	0
Guangzhou_Medical_University	0		Faculte_des_Sciences_de_Luminy	0		Gajra_Raja_Medical_College	0		Finch_University_of_Health_Sciences_Chicago	0		Concordia_University-Chicago	0		Far_Eastern_Federal_University	0		Government_Medical_College_Guru_Nanak_Dev_University_Amritsar_India	0		Gyeongsang_National_University	0		Florida_A&M	0		Edward_Via_College_of_Osteopathic_Medicine	0		Gdansk_Medical_University	0		Florida_A&M	0		Federal_University_of_Pernambuco	0		Gazi_Üniversitesi	0		Florida_International	0		Gazi_Üniversitesi	0		Hanover_College	0
Guangzhou_University_of_Chinese_Medicine	0		Fairleigh_Dickinson	0		Gallaudet	0		First_Medical_School_University_of_Naples	0		Corvinus_University_of_Budapest	0		Far_Eastern_University_Philippines	0		Government_Medical_College_Mysore_University_India	0		Hacettepe_University	0		Florida_Atlantic	0		Ege_University	0		George_Fox_University	0		Florida_Atlantic	0		Federal_University_of_Rio_de_Janeiro	0		Gdansk_Medical_University	0		Fordham	0		Gdansk_Medical_University	0		Hanover_University_Germany	0
Gujarat_University	0		Far_Eastern_Federal_University	0		Ganesh_Shankar_Vidyarthi_Memorial_Medical_College	0		First_Moscow_State_Medical_University	0		Council_of_Scientific_and_Industrial_Research	0		Fatima_Jinnah_Medical_College	0		Government_Medical_College_Patiala	0		Hadassah_Medical_School	0		Florida_International	0		Ehime_University	0		George_Mason	0		Florida_Institute_of_Technology	0		Federal_University_of_Rio_Grande_do_Norte	0		George_Fox_University	0		Fourth_Military_Medical_University	0		George_Fox_University	0		Hanyang_University	0
Gulhane_Military_Medical_School	0		Far_Eastern_University_Philippines	0		Gardner-Webb_University	0		Flinders_University	0		Courant_Institute_of_Mathematical_Sciences	0		Favaloro_University	0		Government_Medical_College_Srinagar_Jammu_and_Kashmir_India	0		Hahnemann_Medical_College_Philadelphia	0		Florida_State	0		EIM_Institute_of_Health_Professions	0		George_Washington	0		Florida_International	0		Federal_University_of_Rio_Grande_do_Sul	0		George_Mason	0		Francois_Rabelais_University	0		George_Mason	0		Harbin_Institute_of_Technology	0
Gunma_University	0		Fatima_Jinnah_Medical_College	0		Gauhati_University_Gauhati	0		Florida_A&M	0		Coventry_University	0		Fayetteville_State_University	0		Governors_State_University	0		Hahnemann_University_Hospital	0		Fordham	0		Eindhoven_University_of_Technology	0		Georgia_College_and_State_University	0		Fordham	0		Federal_University_of_Santa_Catarina	0		George_Washington	0		Franklin_Pierce_Law_Center	0		Georgia_College_and_State_University	0		Harbin_Medical_University	0
Guntur_Medical_College	0		Favaloro_University	0		Gazi_Üniversitesi	0		Florida_Atlantic	0		Cracow_University	0		Federal_University_of_Espírito_Santo	0		Graduate_School_and_University_Center_(CUNY)	0		Hallym_University	0		Fourth_Military_Medical_University	0		Elon_University	0		Georgia_Southern	0		Fourth_Military_Medical_University	0		Federal_University_of_Santa_Maria	0		Georgia_College_and_State_University	0		Free_University_Berlin	0		Georgia_Southern	0		Hardin-Simmons_University	0
Guru_Nanak_Dev_University	0		Fayetteville_State_University	0		Gdansk_Medical_University	0		Florida_International	0		Cukurova_University	0		Federal_University_of_Goias	0		Graduate_School_of_Chinese_Academy_of_Agriculture_Science	0		Hamamatsu_University	0		Francois_Rabelais_University	0		Engelhardt_Institute_of_Molecular_Biology	0		Georgia_State	0		Francois_Rabelais_University	0		Federal_University_of_Sao_Paulo	0		Georgia_Southern	0		Freie_University_of_Berlin	0		Georgia_Tech	0		Harokopio_University	0
Gyeongsang_National_University	0		Federal_University_of_Ceara	0		George_Fox_University	0		Fordham	0		Curie_Institute_Paris	0		Federal_University_of_Juiz_de_Fora	0		Graduate_Theological_Union	0		Hamburg_University_of_Technology	0		Franklin_Pierce_Law_Center	0		ENSAE_ParisTech	0		Georgian_Academy_of_Sciences	0		Franklin_Pierce_Law_Center	0		Federal_University_of_Uberlandia	0		Georgia_State	0		Friedrich-Alexander_University_of_Erlangen-Nurnberg	0		Georgian_Academy_of_Sciences	0		Harrison_College	0
Hacettepe_University	0		Federal_University_of_Espírito_Santo	0		George_Mason	0		Fourth_Military_Medical_University	0		Curtin_University	0		Federal_University_of_Mato_Grosso_do_Sul	0		Grambling_State_University	0		Hamline_University	0		Free_University_Berlin	0		Eotvos_Lorand_University	0		German_Sport_University	0		Free_University_Berlin	0		Federal_University_of_Vicosa	0		Georgia_Tech	0		Friedrich-Schiller_University_of_Jena	0		German_Sport_University	0		Haryana_Agricultural_University	0
Hadassah_Medical_School	0		Federal_University_of_Goias	0		Georgia_College_and_State_University	0		Francois_Rabelais_University	0		Czechoslovak_Academy_of_Sciences	0		Federal_University_of_Pernambuco	0		Grand_Canyon_University	0		Hampton	0		Freie_University_of_Berlin	0		Erasmus_University_Medical_Center	0		Gestalt_Institute	0		Freie_University_of_Berlin	0		Ferris_State_University	0		Georgian_Academy_of_Sciences	0		Frontier_Nursing_University	0		Gestalt_Institute	0		Havana_Advanced_Institute_Of_Medical_Sciences	0
Hahnemann_Medical_College_Philadelphia	0		Federal_University_of_Juiz_de_Fora	0		Georgia_Southern	0		Franklin_Pierce_Law_Center	0		Daemen_College	0		Federal_University_of_Rio_de_Janeiro	0		Grant_Medical_College_and_Sir_JJ_Group_of_Hospitals	0		Hannover_Medical_School_Hannover	0		Friedrich-Alexander_University_of_Erlangen-Nurnberg	0		Erasmus_University_Rotterdam	0		Ghent_University	0		Friedrich-Alexander_University_of_Erlangen-Nurnberg	0		Fielding_Graduate	0		German_Sport_University	0		Frumkin_Institute_of_Electrochemistry	0		Ghent_University	0		Haverford_College	0
Hahnemann_University_Hospital	0		Federal_University_of_Mato_Grosso_do_Sul	0		Georgia_State	0		Free_University_Berlin	0		Dagestan_Medical_Academy	0		Federal_University_of_Rio_Grande_do_Norte	0		Graz_University_of_Technology	0		Hanover_College	0		Friedrich-Schiller_University_of_Jena	0		Erciyes_University	0		Gifu_University	0		Friedrich-Schiller_University_of_Jena	0		Finch_University	0		Gestalt_Institute	0		Fudan_University	0		Gifu_University	0		Hawler_Medical_University	0
Hallym_University	0		Federal_University_of_Pernambuco	0		Georgian_Academy_of_Sciences	0		Friedrich-Alexander_University_of_Erlangen-Nurnberg	0		Dalian_Institute_of_Chemical_Physics	0		Federal_University_of_Rio_Grande_do_Sul	0		Grenoble_Institute_of_Technology	0		Hanover_University_Germany	0		Frontier_Nursing_University	0		Escola_Paulista_de_Medicina	0		Glasgow_Caledonian_University	0		Frontier_Nursing_University	0		Finch_University_of_Health_Sciences_Chicago	0		Ghent_University	0		Fujian_Agriculture_and_Forestry_University	0		Glasgow_Caledonian_University	0		Health_Policy_Institute	0
Hamamatsu_University	0		Federal_University_of_Rio_de_Janeiro	0		German_Sport_University	0		Friedrich-Schiller_University_of_Jena	0		Dalian_Medical_University	0		Federal_University_of_Santa_Catarina	0		Griffith_University	0		Hanyang_University	0		Frumkin_Institute_of_Electrochemistry	0		ETH_Zurich	0		Goa_Medical_College	0		Frumkin_Institute_of_Electrochemistry	0		First_Medical_School_University_of_Naples	0		Gifu_University	0		Fujian_Medical_University	0		Goa_Medical_College	0		Heat_and_Transfer_Institute	0
Hamburg_University_of_Technology	0		Federal_University_of_Rio_Grande_do_Norte	0		Gestalt_Institute	0		Frontier_Nursing_University	0		Dalian_University_of_Technology	0		Federal_University_of_Santa_Maria	0		Grigore_T_Popa_University_of_Medicine_and_Pharmacy	0		Harbin_Institute_of_Technology	0		Fudan_University	0		European_Molecular_Biology_Laboratory	0		Goethe_University_Frankfurt	0		Fujian_Agriculture_and_Forestry_University	0		First_Moscow_State_Medical_University	0		Glasgow_Caledonian_University	0		Fujita_Health_University	0		Goethe_University_Frankfurt	0		Hebei_Medical_University	0
Hamline_University	0		Federal_University_of_Rio_Grande_do_Sul	0		Ghent_University	0		Frumkin_Institute_of_Electrochemistry	0		Damascus_University	0		Federal_University_of_Sao_Paulo	0		Guangxi_Medical_University	0		Harbin_Medical_University	0		Fujian_Agriculture_and_Forestry_University	0		Eurotechnical_Research_University	0		Golden_Gate_University	0		Fujian_Medical_University	0		Flinders_University	0		Goa_Medical_College	0		Fukui_Medical_University_of_Japan	0		Golden_Gate_University	0		Heidelberg_University	0
Hampton	0		Federal_University_of_Santa_Catarina	0		Gifu_University	0		Fudan_University	0		Dankook_University	0		Federal_University_of_Uberlandia	0		Guangzhou_Medical_University	0		Hardin-Simmons_University	0		Fujian_Medical_University	0		Evangelical_University_of_Parana	0		Gonzaga	0		Fujita_Health_University	0		Florida_A&M	0		Goethe_University_Frankfurt	0		Fukushima_Medical_University	0		Gonzaga	0		Heinrich-Heine_University	0
Hannover_Medical_School_Hannover	0		Federal_University_of_Santa_Maria	0		Glasgow_Caledonian_University	0		Fujian_Agriculture_and_Forestry_University	0		Davao_Medical_School	0		Federal_University_of_Vicosa	0		Guangzhou_University_of_Chinese_Medicine	0		Harokopio_University	0		Fujita_Health_University	0		Ewha_Women's_University	0		Gorakhpur_University	0		Fukui_Medical_University_of_Japan	0		Florida_Atlantic	0		Golden_Gate_University	0		Fuller_Graduate_School_of_Psychology_Pasadena_CA	0		Gorakhpur_University	0		Hellenic_Pasteur_Institute	0
Hanover_College	0		Federal_University_of_Uberlandia	0		Goa_Medical_College	0		Fujian_Medical_University	0		Dayanand_Medical_College	0		Ferris_State_University	0		Gujarat_University	0		Harrison_College	0		Fukui_Medical_University_of_Japan	0		Fachhochschule_of_Tech_Wurzburg	0		Government_Medical_College	0		Fukushima_Medical_University	0		Florida_Institute_of_Technology	0		Gonzaga	0		Fuller_Theological_Seminary	0		Government_Medical_College	0		Helmholtz_Center_Munich	0
Hanover_University_Germany	0		Federal_University_of_Vicosa	0		Goethe_University_Frankfurt	0		Fujita_Health_University	0		De_Montfort_University	0		Fielding_Graduate	0		Gulhane_Military_Medical_School	0		Haryana_Agricultural_University	0		Fukushima_Medical_University	0		Faculdade_de_Ciencias_Agrarias_do_Planalto_Central	0		Government_Medical_College_Chandigarh_Punjab_University	0		Fuller_Graduate_School_of_Psychology_Pasadena_CA	0		Florida_International	0		Gorakhpur_University	0		Gabrichevsky_Research_Institute_of_Epidemiology_and_Microbiology	0		Government_Medical_College_Chandigarh_Punjab_University	0		Helsinki_University_of_Technology	0
Hanyang_University	0		Ferris_State_University	0		Golden_Gate_University	0		Fukui_Medical_University_of_Japan	0		Deakin_University	0		Finch_University	0		Gunma_University	0		Havana_Advanced_Institute_Of_Medical_Sciences	0		Fuller_Graduate_School_of_Psychology_Pasadena_CA	0		Faculte_des_Sciences_de_Luminy	0		Government_Medical_College_Gulbarga_University_India	0		Fuller_Theological_Seminary	0		Florida_State	0		Government_Medical_College	0		Gajra_Raja_Medical_College	0		Government_Medical_College_Gulbarga_University_India	0		Henan_Medical_University	0
Harbin_Institute_of_Technology	0		Fielding_Graduate	0		Gonzaga	0		Fukushima_Medical_University	0		Defence_Research_and_Development_Establishment	0		Finch_University_of_Health_Sciences_Chicago	0		Guntur_Medical_College	0		Haverford_College	0		Fuller_Theological_Seminary	0		Fairleigh_Dickinson	0		Government_Medical_College_Guru_Nanak_Dev_University_Amritsar_India	0		Gabrichevsky_Research_Institute_of_Epidemiology_and_Microbiology	0		Fordham	0		Government_Medical_College_Chandigarh_Punjab_University	0		Gallaudet	0		Government_Medical_College_Guru_Nanak_Dev_University_Amritsar_India	0		Henan_University	0
Harbin_Medical_University	0		Finch_University	0		Gorakhpur_University	0		Fuller_Graduate_School_of_Psychology_Pasadena_CA	0		Delft_University_of_Technology	0		First_Medical_School_University_of_Naples	0		Guru_Nanak_Dev_University	0		Hawler_Medical_University	0		Gabrichevsky_Research_Institute_of_Epidemiology_and_Microbiology	0		Far_Eastern_Federal_University	0		Government_Medical_College_Mysore_University_India	0		Gajra_Raja_Medical_College	0		Fourth_Military_Medical_University	0		Government_Medical_College_Gulbarga_University_India	0		Gandhi_Medical_College_Hyderabad_India	0		Government_Medical_College_Mysore_University_India	0		Hengyang_Medical_College	0
Hardin-Simmons_University	0		Finch_University_of_Health_Sciences_Chicago	0		Government_Medical_College	0		Fuller_Theological_Seminary	0		Delta_State_University	0		First_Moscow_State_Medical_University	0		Gyeongsang_National_University	0		Health_Policy_Institute	0		Gajra_Raja_Medical_College	0		Far_Eastern_University_Philippines	0		Government_Medical_College_Patiala	0		Gallaudet	0		Francois_Rabelais_University	0		Government_Medical_College_Guru_Nanak_Dev_University_Amritsar_India	0		Ganesh_Shankar_Vidyarthi_Memorial_Medical_College	0		Government_Medical_College_Patiala	0		Henry_Poincare_University	0
Harokopio_University	0		First_Medical_School_University_of_Naples	0		Government_Medical_College_Chandigarh_Punjab_University	0		Gabrichevsky_Research_Institute_of_Epidemiology_and_Microbiology	0		DePaul	0		Flinders_University	0		Hacettepe_University	0		Heat_and_Transfer_Institute	0		Gallaudet	0		Fatima_Jinnah_Medical_College	0		Government_Medical_College_Srinagar_Jammu_and_Kashmir_India	0		Gandhi_Medical_College_Hyderabad_India	0		Franklin_Pierce_Law_Center	0		Government_Medical_College_Mysore_University_India	0		Gardner-Webb_University	0		Government_Medical_College_Srinagar_Jammu_and_Kashmir_India	0		Heriot-Watt_University	0
Harrison_College	0		First_Moscow_State_Medical_University	0		Government_Medical_College_Gulbarga_University_India	0		Gajra_Raja_Medical_College	0		Des_Moines_University	0		Florida_A&M	0		Hadassah_Medical_School	0		Hebei_Medical_University	0		Gandhi_Medical_College_Hyderabad_India	0		Favaloro_University	0		Governors_State_University	0		Ganesh_Shankar_Vidyarthi_Memorial_Medical_College	0		Free_University_Berlin	0		Government_Medical_College_Patiala	0		Gauhati_University_Gauhati	0		Governors_State_University	0		Higher_Institute_of_Medical_Sciences	0
Haryana_Agricultural_University	0		Flinders_University	0		Government_Medical_College_Guru_Nanak_Dev_University_Amritsar_India	0		Gallaudet	0		Deutsches_Elektronen-Synchrotron	0		Florida_Atlantic	0		Hahnemann_Medical_College_Philadelphia	0		Hebrew_University_of_Jerusalem	0		Ganesh_Shankar_Vidyarthi_Memorial_Medical_College	0		Fayetteville_State_University	0		Graduate_School_of_Chinese_Academy_of_Agriculture_Science	0		Gardner-Webb_University	0		Freie_University_of_Berlin	0		Government_Medical_College_Srinagar_Jammu_and_Kashmir_India	0		Gazi_Üniversitesi	0		Graduate_School_and_University_Center_(CUNY)	0		Highland_University	0
Havana_Advanced_Institute_Of_Medical_Sciences	0		Florida_A&M	0		Government_Medical_College_Patiala	0		Gandhi_Medical_College_Hyderabad_India	0		Devi_Ahilya_University	0		Florida_Institute_of_Technology	0		Hahnemann_University_Hospital	0		Heidelberg_University	0		Gardner-Webb_University	0		Federal_University_of_Ceara	0		Graduate_Theological_Union	0		Gauhati_University_Gauhati	0		Friedrich-Alexander_University_of_Erlangen-Nurnberg	0		Governors_State_University	0		Gdansk_Medical_University	0		Graduate_School_of_Chinese_Academy_of_Agriculture_Science	0		Hiroshima_University	0
Haverford_College	0		Florida_Atlantic	0		Government_Medical_College_Srinagar_Jammu_and_Kashmir_India	0		Ganesh_Shankar_Vidyarthi_Memorial_Medical_College	0		Dibrugarh_University	0		Florida_International	0		Hallym_University	0		Heinrich-Heine_University	0		Gauhati_University_Gauhati	0		Federal_University_of_Espírito_Santo	0		Grambling_State_University	0		Gazi_Üniversitesi	0		Friedrich-Schiller_University_of_Jena	0		Graduate_School_and_University_Center_(CUNY)	0		George_Fox_University	0		Graduate_Theological_Union	0		Hirszfeld_Institute_and_Basel_Institute_for_Immunology	0
Hawler_Medical_University	0		Florida_Institute_of_Technology	0		Governors_State_University	0		Gardner-Webb_University	0		Dokuz_Eylul_University	0		Fordham	0		Hamamatsu_University	0		Hellenic_Pasteur_Institute	0		Gazi_Üniversitesi	0		Federal_University_of_Goias	0		Grand_Canyon_University	0		Gdansk_Medical_University	0		Frontier_Nursing_University	0		Graduate_School_of_Chinese_Academy_of_Agriculture_Science	0		George_Mason	0		Grambling_State_University	0		Hofstra	0
Health_Policy_Institute	0		Florida_International	0		Graduate_School_and_University_Center_(CUNY)	0		Gauhati_University_Gauhati	0		Dominion_University_Urban	0		Fourth_Military_Medical_University	0		Hamburg_University_of_Technology	0		Helmholtz_Center_Munich	0		Gdansk_Medical_University	0		Federal_University_of_Juiz_de_Fora	0		Grant_Medical_College_and_Sir_JJ_Group_of_Hospitals	0		George_Fox_University	0		Frumkin_Institute_of_Electrochemistry	0		Graduate_Theological_Union	0		Georgetown	0		Grand_Canyon_University	0		Hokkaido_University	0
Heat_and_Transfer_Institute	0		Florida_State	0		Graduate_School_of_Chinese_Academy_of_Agriculture_Science	0		Gazi_Üniversitesi	0		Donetsk_National_Technical_University	0		Francois_Rabelais_University	0		Hamline_University	0		Helsinki_University_of_Technology	0		George_Fox_University	0		Federal_University_of_Mato_Grosso_do_Sul	0		Graz_University_of_Technology	0		George_Mason	0		Fujian_Agriculture_and_Forestry_University	0		Grambling_State_University	0		Georgia_College_and_State_University	0		Grant_Medical_College_and_Sir_JJ_Group_of_Hospitals	0		Hong_Kong_Baptist_University	0
Hebei_Medical_University	0		Fordham	0		Graduate_Theological_Union	0		Gdansk_Medical_University	0		Dongguk_University	0		Franklin_Pierce_Law_Center	0		Hampton	0		Henan_Medical_University	0		George_Mason	0		Federal_University_of_Pernambuco	0		Grenoble_Institute_of_Technology	0		Georgetown	0		Fujian_Medical_University	0		Grand_Canyon_University	0		Georgia_Southern	0		Graz_University_of_Technology	0		Hong_Kong_University_of_Science_and_Technology	0
Heidelberg_University	0		Fourth_Military_Medical_University	0		Grambling_State_University	0		George_Fox_University	0		Dow_Medical_College	0		Free_University_Berlin	0		Hannover_Medical_School_Hannover	0		Henan_University	0		Georgia_College_and_State_University	0		Federal_University_of_Rio_de_Janeiro	0		Griffith_University	0		Georgia_College_and_State_University	0		Fujita_Health_University	0		Grant_Medical_College_and_Sir_JJ_Group_of_Hospitals	0		Georgia_State	0		Grenoble_Institute_of_Technology	0		Hoshi_University	0
Heinrich-Heine_University	0		Francois_Rabelais_University	0		Grand_Canyon_University	0		George_Mason	0		Dowling_College	0		Friedrich-Schiller_University_of_Jena	0		Hanover_College	0		Hengyang_Medical_College	0		Georgia_Southern	0		Federal_University_of_Rio_Grande_do_Norte	0		Grigore_T_Popa_University_of_Medicine_and_Pharmacy	0		Georgia_Southern	0		Fukui_Medical_University_of_Japan	0		Graz_University_of_Technology	0		Georgian_Academy_of_Sciences	0		Griffith_University	0		Howard	0
Hellenic_Pasteur_Institute	0		Franklin_Pierce_Law_Center	0		Grant_Medical_College_and_Sir_JJ_Group_of_Hospitals	0		George_Washington	0		Drake_University	0		Frontier_Nursing_University	0		Hanover_University_Germany	0		Henry_Poincare_University	0		Georgia_State	0		Federal_University_of_Rio_Grande_do_Sul	0		Guangxi_Medical_University	0		Georgian_Academy_of_Sciences	0		Fukushima_Medical_University	0		Grenoble_Institute_of_Technology	0		German_Sport_University	0		Grigore_T_Popa_University_of_Medicine_and_Pharmacy	0		Huazhong_Agricultural_University	0
Helmholtz_Center_Munich	0		Freie_University_of_Berlin	0		Graz_University_of_Technology	0		Georgia_College_and_State_University	0		Drew	0		Frumkin_Institute_of_Electrochemistry	0		Hanyang_University	0		Heriot-Watt_University	0		Georgia_Tech	0		Federal_University_of_Santa_Catarina	0		Guangzhou_Medical_University	0		German_Sport_University	0		Fuller_Graduate_School_of_Psychology_Pasadena_CA	0		Griffith_University	0		Gestalt_Institute	0		Guangxi_Medical_University	0		Huazhong_University_of_Science_and_Technology	0
Helsinki_University_of_Technology	0		Friedrich-Alexander_University_of_Erlangen-Nurnberg	0		Grenoble_Institute_of_Technology	0		Georgia_Southern	0		Dropsie_College	0		Fudan_University	0		Harbin_Institute_of_Technology	0		Higher_Institute_of_Medical_Sciences	0		Georgian_Academy_of_Sciences	0		Federal_University_of_Santa_Maria	0		Guangzhou_University_of_Chinese_Medicine	0		Gestalt_Institute	0		Gabrichevsky_Research_Institute_of_Epidemiology_and_Microbiology	0		Grigore_T_Popa_University_of_Medicine_and_Pharmacy	0		Ghent_University	0		Guangzhou_Medical_University	0		Humboldt_University_of_Berlin	0
Henan_Medical_University	0		Friedrich-Schiller_University_of_Jena	0		Griffith_University	0		Georgian_Academy_of_Sciences	0		Dublin_City_University	0		Fujian_Agriculture_and_Forestry_University	0		Harbin_Medical_University	0		Highland_University	0		German_Sport_University	0		Federal_University_of_Sao_Paulo	0		Gujarat_University	0		Ghent_University	0		Gajra_Raja_Medical_College	0		Guangxi_Medical_University	0		Gifu_University	0		Guangzhou_University_of_Chinese_Medicine	0		Hunan_Medical_University	0
Henan_University	0		Frontier_Nursing_University	0		Grigore_T_Popa_University_of_Medicine_and_Pharmacy	0		German_Sport_University	0		Durham_University	0		Fujian_Medical_University	0		Hardin-Simmons_University	0		Hiroshima_University	0		Gestalt_Institute	0		Federal_University_of_Uberlandia	0		Gulhane_Military_Medical_School	0		Gifu_University	0		Gallaudet	0		Guangzhou_Medical_University	0		Glasgow_Caledonian_University	0		Gujarat_University	0		Hunan_Normal_University	0
Hengyang_Medical_College	0		Frumkin_Institute_of_Electrochemistry	0		Guangxi_Medical_University	0		Gestalt_Institute	0		East_Carolina	0		Fujita_Health_University	0		Harokopio_University	0		Hofstra	0		Ghent_University	0		Federal_University_of_Vicosa	0		Gunma_University	0		Glasgow_Caledonian_University	0		Gandhi_Medical_College_Hyderabad_India	0		Guangzhou_University_of_Chinese_Medicine	0		Goa_Medical_College	0		Gulhane_Military_Medical_School	0		Hunan_University	0
Henry_Poincare_University	0		Fudan_University	0		Guangzhou_Medical_University	0		Ghent_University	0		East_China_Normal_University	0		Fukui_Medical_University_of_Japan	0		Harrison_College	0		Hokkaido_University	0		Gifu_University	0		Ferris_State_University	0		Guntur_Medical_College	0		Goa_Medical_College	0		Ganesh_Shankar_Vidyarthi_Memorial_Medical_College	0		Gujarat_University	0		Goethe_University_Frankfurt	0		Gunma_University	0		Huntsman_Cancer_Institute	0
Heriot-Watt_University	0		Fujian_Agriculture_and_Forestry_University	0		Guangzhou_University_of_Chinese_Medicine	0		Gifu_University	0		East_China_University_of_Science_and_Technology	0		Fukushima_Medical_University	0		Haryana_Agricultural_University	0		Hong_Kong_Baptist_University	0		Glasgow_Caledonian_University	0		Fielding_Graduate	0		Guru_Nanak_Dev_University	0		Goethe_University_Frankfurt	0		Gardner-Webb_University	0		Gulhane_Military_Medical_School	0		Golden_Gate_University	0		Guntur_Medical_College	0		Hyogo_College_of_Medicine	0
Higher_Institute_of_Medical_Sciences	0		Fujian_Medical_University	0		Gujarat_University	0		Glasgow_Caledonian_University	0		East_Texas_State_University	0		Fuller_Graduate_School_of_Psychology_Pasadena_CA	0		Havana_Advanced_Institute_Of_Medical_Sciences	0		Hong_Kong_University_of_Science_and_Technology	0		Goa_Medical_College	0		Finch_University	0		Gyeongsang_National_University	0		Golden_Gate_University	0		Gauhati_University_Gauhati	0		Gunma_University	0		Gonzaga	0		Guru_Nanak_Dev_University	0		Ibero-American_University_Puebla	0
Highland_University	0		Fujita_Health_University	0		Gulhane_Military_Medical_School	0		Goa_Medical_College	0		Eastern_Michigan	0		Fuller_Theological_Seminary	0		Haverford_College	0		Hoshi_University	0		Goethe_University_Frankfurt	0		Finch_University_of_Health_Sciences_Chicago	0		Hacettepe_University	0		Gonzaga	0		Gazi_Üniversitesi	0		Guntur_Medical_College	0		Gorakhpur_University	0		Gyeongsang_National_University	0		Idaho_State	0
Hiroshima_University	0		Fukui_Medical_University_of_Japan	0		Gunma_University	0		Goethe_University_Frankfurt	0		Eastern_Virginia_Medical_School	0		Gabrichevsky_Research_Institute_of_Epidemiology_and_Microbiology	0		Hawler_Medical_University	0		Howard	0		Golden_Gate_University	0		First_Medical_School_University_of_Naples	0		Hadassah_Medical_School	0		Gorakhpur_University	0		Gdansk_Medical_University	0		Guru_Nanak_Dev_University	0		Government_Medical_College	0		Hacettepe_University	0		Illinois_Medical_Center	0
Hirszfeld_Institute_and_Basel_Institute_for_Immunology	0		Fukushima_Medical_University	0		Guntur_Medical_College	0		Golden_Gate_University	0		Ecole_Centrale_de_Lille	0		Gajra_Raja_Medical_College	0		Health_Policy_Institute	0		Huazhong_Agricultural_University	0		Gonzaga	0		First_Moscow_State_Medical_University	0		Hahnemann_Medical_College_Philadelphia	0		Government_Medical_College	0		George_Fox_University	0		Gyeongsang_National_University	0		Government_Medical_College_Chandigarh_Punjab_University	0		Hadassah_Medical_School	0		Illinois_School_of_Professional_Psychology	0
Hofstra	0		Fuller_Graduate_School_of_Psychology_Pasadena_CA	0		Guru_Nanak_Dev_University	0		Gonzaga	0		Ecole_Centrale_Lyon	0		Gallaudet	0		Heat_and_Transfer_Institute	0		Huazhong_University_of_Science_and_Technology	0		Gorakhpur_University	0		Flinders_University	0		Hahnemann_University_Hospital	0		Government_Medical_College_Chandigarh_Punjab_University	0		George_Mason	0		Hadassah_Medical_School	0		Government_Medical_College_Gulbarga_University_India	0		Hahnemann_Medical_College_Philadelphia	0		Illinois_State	0
Hokkaido_University	0		Fuller_Theological_Seminary	0		Gyeongsang_National_University	0		Gorakhpur_University	0		Ecole_National_Veterinaire_de_Lyon	0		Gandhi_Medical_College_Hyderabad_India	0		Hebei_Medical_University	0		Humboldt_University_of_Berlin	0		Government_Medical_College	0		Florida_A&M	0		Hallym_University	0		Government_Medical_College_Gulbarga_University_India	0		Georgia_College_and_State_University	0		Hahnemann_Medical_College_Philadelphia	0		Government_Medical_College_Guru_Nanak_Dev_University_Amritsar_India	0		Hahnemann_University_Hospital	0		Illinois_Tech	0
Hong_Kong_Baptist_University	0		Gabrichevsky_Research_Institute_of_Epidemiology_and_Microbiology	0		Hadassah_Medical_School	0		Government_Medical_College	0		Ecole_Nationale_Superieure_des_Telecommunications	0		Ganesh_Shankar_Vidyarthi_Memorial_Medical_College	0		Heidelberg_University	0		Hunan_Medical_University	0		Government_Medical_College_Chandigarh_Punjab_University	0		Florida_Atlantic	0		Hamamatsu_University	0		Government_Medical_College_Guru_Nanak_Dev_University_Amritsar_India	0		Georgia_Southern	0		Hahnemann_University_Hospital	0		Government_Medical_College_Mysore_University_India	0		Hallym_University	0		Ilorin_University	0
Hong_Kong_University_of_Science_and_Technology	0		Gajra_Raja_Medical_College	0		Hahnemann_Medical_College_Philadelphia	0		Government_Medical_College_Chandigarh_Punjab_University	0		Ecole_Nationale_Veterinaire_d'Alfort	0		Gardner-Webb_University	0		Heinrich-Heine_University	0		Hunan_Normal_University	0		Government_Medical_College_Gulbarga_University_India	0		Florida_Institute_of_Technology	0		Hamburg_University_of_Technology	0		Government_Medical_College_Mysore_University_India	0		Georgia_Tech	0		Hallym_University	0		Government_Medical_College_Patiala	0		Hamamatsu_University	0		IMMACULATA_UNIVERSITY	0
Hoshi_University	0		Gallaudet	0		Hahnemann_University_Hospital	0		Government_Medical_College_Gulbarga_University_India	0		Ecole_Normale_Superieure	0		Gauhati_University_Gauhati	0		Hellenic_Pasteur_Institute	0		Hunan_University	0		Government_Medical_College_Guru_Nanak_Dev_University_Amritsar_India	0		Florida_International	0		Hamline_University	0		Government_Medical_College_Patiala	0		Georgian_Academy_of_Sciences	0		Hamamatsu_University	0		Government_Medical_College_Srinagar_Jammu_and_Kashmir_India	0		Hamburg_University_of_Technology	0		Imperial_Cancer_Research_Fund	0
Howard	0		Gandhi_Medical_College_Hyderabad_India	0		Hallym_University	0		Government_Medical_College_Guru_Nanak_Dev_University_Amritsar_India	0		Ecole_Normale_Superieure_Paris-Saclay	0		Gazi_Üniversitesi	0		Helmholtz_Center_Munich	0		Hyogo_College_of_Medicine	0		Government_Medical_College_Mysore_University_India	0		Florida_State	0		Hampton	0		Government_Medical_College_Srinagar_Jammu_and_Kashmir_India	0		German_Sport_University	0		Hamburg_University_of_Technology	0		Governors_State_University	0		Hamline_University	0		Imperial_College_London	0
Huazhong_Agricultural_University	0		Ganesh_Shankar_Vidyarthi_Memorial_Medical_College	0		Hamamatsu_University	0		Government_Medical_College_Mysore_University_India	0		Edinburgh_Napier_University	0		Gdansk_Medical_University	0		Helsinki_University_of_Technology	0		Ibero-American_University_Puebla	0		Government_Medical_College_Patiala	0		Fordham	0		Hannover_Medical_School_Hannover	0		Governors_State_University	0		Gestalt_Institute	0		Hamline_University	0		Graduate_School_and_University_Center_(CUNY)	0		Hampton	0		IMTECH	0
Huazhong_University_of_Science_and_Technology	0		Gardner-Webb_University	0		Hamburg_University_of_Technology	0		Government_Medical_College_Patiala	0		Edith_Cowan_University	0		George_Fox_University	0		Henan_Medical_University	0		Idaho_State	0		Government_Medical_College_Srinagar_Jammu_and_Kashmir_India	0		Fourth_Military_Medical_University	0		Hanover_College	0		Graduate_School_and_University_Center_(CUNY)	0		Ghent_University	0		Hampton	0		Graduate_School_of_Chinese_Academy_of_Agriculture_Science	0		Hannover_Medical_School_Hannover	0		India-Nagpur_University	0
Humboldt_University_of_Berlin	0		Gauhati_University_Gauhati	0		Hamline_University	0		Government_Medical_College_Srinagar_Jammu_and_Kashmir_India	0		Ege_University	0		George_Mason	0		Henan_University	0		Illinois_Medical_Center	0		Governors_State_University	0		Francois_Rabelais_University	0		Hanover_University_Germany	0		Graduate_School_of_Chinese_Academy_of_Agriculture_Science	0		Gifu_University	0		Hannover_Medical_School_Hannover	0		Graduate_Theological_Union	0		Hanover_College	0		Indian_Agricultural_Research_Institute	0
Hunan_Medical_University	0		Gazi_Üniversitesi	0		Hampton	0		Governors_State_University	0		Ehime_University	0		Georgia_College_and_State_University	0		Hengyang_Medical_College	0		Illinois_School_of_Professional_Psychology	0		Graduate_School_and_University_Center_(CUNY)	0		Franklin_Pierce_Law_Center	0		Hanyang_University	0		Graduate_Theological_Union	0		Glasgow_Caledonian_University	0		Hanover_College	0		Grambling_State_University	0		Hanover_University_Germany	0		Indian_Association_for_the_Cultivation_of_Science	0
Hunan_Normal_University	0		Gdansk_Medical_University	0		Hannover_Medical_School_Hannover	0		Graduate_School_of_Chinese_Academy_of_Agriculture_Science	0		EIM_Institute_of_Health_Professions	0		Georgia_Southern	0		Henry_Poincare_University	0		Illinois_State	0		Graduate_School_of_Chinese_Academy_of_Agriculture_Science	0		Free_University_Berlin	0		Harbin_Institute_of_Technology	0		Grambling_State_University	0		Goa_Medical_College	0		Hanover_University_Germany	0		Grand_Canyon_University	0		Hanyang_University	0		Indian_Institute_of_Chemical_Biology	0
Hunan_University	0		George_Fox_University	0		Hanover_College	0		Graduate_Theological_Union	0		Eindhoven_University_of_Technology	0		Georgia_State	0		Heriot-Watt_University	0		Illinois_Tech	0		Graduate_Theological_Union	0		Friedrich-Alexander_University_of_Erlangen-Nurnberg	0		Harbin_Medical_University	0		Grand_Canyon_University	0		Goethe_University_Frankfurt	0		Hanyang_University	0		Grant_Medical_College_and_Sir_JJ_Group_of_Hospitals	0		Harbin_Institute_of_Technology	0		Indian_Institute_Of_Chemical_Technology	0
Huntsman_Cancer_Institute	0		George_Mason	0		Hanover_University_Germany	0		Grambling_State_University	0		Elon_University	0		Georgian_Academy_of_Sciences	0		Higher_Institute_of_Medical_Sciences	0		Ilorin_University	0		Grambling_State_University	0		Friedrich-Schiller_University_of_Jena	0		Hardin-Simmons_University	0		Grant_Medical_College_and_Sir_JJ_Group_of_Hospitals	0		Golden_Gate_University	0		Harbin_Institute_of_Technology	0		Graz_University_of_Technology	0		Harbin_Medical_University	0		Indian_Institute_of_Science	0
Hyogo_College_of_Medicine	0		Georgia_College_and_State_University	0		Hanyang_University	0		Grand_Canyon_University	0		Engelhardt_Institute_of_Molecular_Biology	0		German_Sport_University	0		Highland_University	0		IMMACULATA_UNIVERSITY	0		Grand_Canyon_University	0		Frontier_Nursing_University	0		Harokopio_University	0		Graz_University_of_Technology	0		Gonzaga	0		Harbin_Medical_University	0		Grenoble_Institute_of_Technology	0		Hardin-Simmons_University	0		Indian_Institute_of_Technology	0
Ibero-American_University_Puebla	0		Georgia_Southern	0		Harbin_Institute_of_Technology	0		Grant_Medical_College_and_Sir_JJ_Group_of_Hospitals	0		ENSAE_ParisTech	0		Gestalt_Institute	0		Hiroshima_University	0		Imperial_Cancer_Research_Fund	0		Grant_Medical_College_and_Sir_JJ_Group_of_Hospitals	0		Frumkin_Institute_of_Electrochemistry	0		Harrison_College	0		Grenoble_Institute_of_Technology	0		Gorakhpur_University	0		Hardin-Simmons_University	0		Griffith_University	0		Harokopio_University	0		Indian_Institute_of_Technology_Bombay	0
Idaho_State	0		Georgia_State	0		Harbin_Medical_University	0		Graz_University_of_Technology	0		Eotvos_Lorand_University	0		Ghent_University	0		Hirszfeld_Institute_and_Basel_Institute_for_Immunology	0		Imperial_College_London	0		Graz_University_of_Technology	0		Fudan_University	0		Haryana_Agricultural_University	0		Griffith_University	0		Government_Medical_College	0		Harokopio_University	0		Grigore_T_Popa_University_of_Medicine_and_Pharmacy	0		Harrison_College	0		Indian_Institute_of_Technology_Delhi	0
Illinois_Medical_Center	0		Georgia_Tech	0		Hardin-Simmons_University	0		Grenoble_Institute_of_Technology	0		Erasmus_University_Medical_Center	0		Gifu_University	0		Hofstra	0		IMTECH	0		Grenoble_Institute_of_Technology	0		Fujian_Agriculture_and_Forestry_University	0		Havana_Advanced_Institute_Of_Medical_Sciences	0		Grigore_T_Popa_University_of_Medicine_and_Pharmacy	0		Government_Medical_College_Chandigarh_Punjab_University	0		Harrison_College	0		Guangxi_Medical_University	0		Haryana_Agricultural_University	0		Indian_Institute_of_Technology_Kanpur	0
Illinois_School_of_Professional_Psychology	0		Georgian_Academy_of_Sciences	0		Harokopio_University	0		Griffith_University	0		Erasmus_University_Rotterdam	0		Glasgow_Caledonian_University	0		Hong_Kong_Baptist_University	0		India-Nagpur_University	0		Griffith_University	0		Fujian_Medical_University	0		Haverford_College	0		Guangxi_Medical_University	0		Government_Medical_College_Gulbarga_University_India	0		Haryana_Agricultural_University	0		Guangzhou_Medical_University	0		Haverford_College	0		Indian_Institute_of_Technology_Roorkee	0
Illinois_State	0		German_Sport_University	0		Harrison_College	0		Grigore_T_Popa_University_of_Medicine_and_Pharmacy	0		Erciyes_University	0		Goa_Medical_College	0		Hong_Kong_University_of_Science_and_Technology	0		Indian_Agricultural_Research_Institute	0		Grigore_T_Popa_University_of_Medicine_and_Pharmacy	0		Fujita_Health_University	0		Hawler_Medical_University	0		Guangzhou_Medical_University	0		Government_Medical_College_Guru_Nanak_Dev_University_Amritsar_India	0		Havana_Advanced_Institute_Of_Medical_Sciences	0		Guangzhou_University_of_Chinese_Medicine	0		Hawler_Medical_University	0		Indian_Institute_of_Toxicology_Research	0
Illinois_Tech	0		Gestalt_Institute	0		Havana_Advanced_Institute_Of_Medical_Sciences	0		Guangxi_Medical_University	0		Escola_Paulista_de_Medicina	0		Golden_Gate_University	0		Hoshi_University	0		Indian_Association_for_the_Cultivation_of_Science	0		Guangxi_Medical_University	0		Fukui_Medical_University_of_Japan	0		Health_Policy_Institute	0		Guangzhou_University_of_Chinese_Medicine	0		Government_Medical_College_Mysore_University_India	0		Haverford_College	0		Gujarat_University	0		Health_Policy_Institute	0		Indian_Statistical_Institute_Bengaluru	0
Ilorin_University	0		Ghent_University	0		Haverford_College	0		Guangzhou_Medical_University	0		ETH_Zurich	0		Gonzaga	0		Howard	0		Indian_Institute_of_Chemical_Biology	0		Guangzhou_Medical_University	0		Fukushima_Medical_University	0		Heat_and_Transfer_Institute	0		Gujarat_University	0		Government_Medical_College_Patiala	0		Hawler_Medical_University	0		Gulhane_Military_Medical_School	0		Heat_and_Transfer_Institute	0		Indian_Veterinary_Research_Institute_Izatnagar_India	0
IMMACULATA_UNIVERSITY	0		Gifu_University	0		Hawler_Medical_University	0		Guangzhou_University_of_Chinese_Medicine	0		European_Molecular_Biology_Laboratory	0		Gorakhpur_University	0		Huazhong_Agricultural_University	0		Indian_Institute_Of_Chemical_Technology	0		Guangzhou_University_of_Chinese_Medicine	0		Fuller_Graduate_School_of_Psychology_Pasadena_CA	0		Hebei_Medical_University	0		Gulhane_Military_Medical_School	0		Government_Medical_College_Srinagar_Jammu_and_Kashmir_India	0		Health_Policy_Institute	0		Gunma_University	0		Hebei_Medical_University	0		Indiana_State	0
Imperial_Cancer_Research_Fund	0		Glasgow_Caledonian_University	0		Health_Policy_Institute	0		Gujarat_University	0		Eurotechnical_Research_University	0		Government_Medical_College	0		Huazhong_University_of_Science_and_Technology	0		Indian_Institute_of_Science	0		Gujarat_University	0		Fuller_Theological_Seminary	0		Heidelberg_University	0		Gunma_University	0		Governors_State_University	0		Heat_and_Transfer_Institute	0		Guntur_Medical_College	0		Hebrew_University_of_Jerusalem	0		Indiana_University_of_Pennsylvania	0
Imperial_College_London	0		Goa_Medical_College	0		Heat_and_Transfer_Institute	0		Gulhane_Military_Medical_School	0		Evangelical_University_of_Parana	0		Government_Medical_College_Chandigarh_Punjab_University	0		Humboldt_University_of_Berlin	0		Indian_Institute_of_Technology	0		Gulhane_Military_Medical_School	0		Gabrichevsky_Research_Institute_of_Epidemiology_and_Microbiology	0		Heinrich-Heine_University	0		Guntur_Medical_College	0		Graduate_School_and_University_Center_(CUNY)	0		Hebei_Medical_University	0		Guru_Nanak_Dev_University	0		Heidelberg_University	0		Indiana_Wesleyan_University	0
IMTECH	0		Goethe_University_Frankfurt	0		Hebei_Medical_University	0		Gunma_University	0		Ewha_Women's_University	0		Government_Medical_College_Gulbarga_University_India	0		Hunan_Medical_University	0		Indian_Institute_of_Technology_Bombay	0		Gunma_University	0		Gajra_Raja_Medical_College	0		Hellenic_Pasteur_Institute	0		Guru_Nanak_Dev_University	0		Graduate_School_of_Chinese_Academy_of_Agriculture_Science	0		Hebrew_University_of_Jerusalem	0		Gyeongsang_National_University	0		Heinrich-Heine_University	0		Industrial_Toxicology_Research_Center	0
India-Nagpur_University	0		Golden_Gate_University	0		Heidelberg_University	0		Guntur_Medical_College	0		Fachhochschule_of_Tech_Wurzburg	0		Government_Medical_College_Guru_Nanak_Dev_University_Amritsar_India	0		Hunan_Normal_University	0		Indian_Institute_of_Technology_Delhi	0		Guntur_Medical_College	0		Gallaudet	0		Helmholtz_Center_Munich	0		Gyeongsang_National_University	0		Graduate_Theological_Union	0		Heidelberg_University	0		Hacettepe_University	0		Hellenic_Pasteur_Institute	0		Inner_Mongolia_Medical_University	0
Indian_Agricultural_Research_Institute	0		Gonzaga	0		Heinrich-Heine_University	0		Guru_Nanak_Dev_University	0		Faculdade_de_Ciencias_Agrarias_do_Planalto_Central	0		Government_Medical_College_Mysore_University_India	0		Hunan_University	0		Indian_Institute_of_Technology_Kanpur	0		Guru_Nanak_Dev_University	0		Gandhi_Medical_College_Hyderabad_India	0		Helsinki_University_of_Technology	0		Hacettepe_University	0		Grambling_State_University	0		Heinrich-Heine_University	0		Hadassah_Medical_School	0		Helmholtz_Center_Munich	0		Inner_Mongolia_University	0
Indian_Association_for_the_Cultivation_of_Science	0		Gorakhpur_University	0		Hellenic_Pasteur_Institute	0		Gyeongsang_National_University	0		Faculte_des_Sciences_de_Luminy	0		Government_Medical_College_Patiala	0		Huntsman_Cancer_Institute	0		Indian_Institute_of_Technology_Roorkee	0		Gyeongsang_National_University	0		Ganesh_Shankar_Vidyarthi_Memorial_Medical_College	0		Henan_Medical_University	0		Hadassah_Medical_School	0		Grand_Canyon_University	0		Hellenic_Pasteur_Institute	0		Hahnemann_Medical_College_Philadelphia	0		Helsinki_University_of_Technology	0		INRIA-Sophia_Antipolis	0
Indian_Institute_of_Chemical_Biology	0		Government_Medical_College	0		Helmholtz_Center_Munich	0		Hacettepe_University	0		Fairleigh_Dickinson	0		Government_Medical_College_Srinagar_Jammu_and_Kashmir_India	0		Hyogo_College_of_Medicine	0		Indian_Institute_of_Toxicology_Research	0		Hacettepe_University	0		Gardner-Webb_University	0		Henan_University	0		Hahnemann_Medical_College_Philadelphia	0		Grant_Medical_College_and_Sir_JJ_Group_of_Hospitals	0		Helmholtz_Center_Munich	0		Hahnemann_University_Hospital	0		Henan_Medical_University	0		Instit_De_Medicina_Si_Farmacie	0
Indian_Institute_Of_Chemical_Technology	0		Government_Medical_College_Chandigarh_Punjab_University	0		Helsinki_University_of_Technology	0		Hadassah_Medical_School	0		Far_Eastern_University_Philippines	0		Governors_State_University	0		Ibero-American_University_Puebla	0		Indian_Veterinary_Research_Institute_Izatnagar_India	0		Hadassah_Medical_School	0		Gauhati_University_Gauhati	0		Hengyang_Medical_College	0		Hahnemann_University_Hospital	0		Graz_University_of_Technology	0		Helsinki_University_of_Technology	0		Hallym_University	0		Henan_University	0		Institut_National_de_la_Recherche_Agronomique	0
Indian_Institute_of_Science	0		Government_Medical_College_Gulbarga_University_India	0		Henan_Medical_University	0		Hahnemann_Medical_College_Philadelphia	0		Fatima_Jinnah_Medical_College	0		Graduate_School_and_University_Center_(CUNY)	0		Icahn_School_of_Medicine	0		Indiana_State	0		Hahnemann_University_Hospital	0		Gdansk_Medical_University	0		Henry_Poincare_University	0		Hallym_University	0		Grenoble_Institute_of_Technology	0		Henan_Medical_University	0		Hamamatsu_University	0		Hengyang_Medical_College	0		Institut_National_des_Sciences	0
Indian_Institute_of_Technology	0		Government_Medical_College_Guru_Nanak_Dev_University_Amritsar_India	0		Henan_University	0		Hahnemann_University_Hospital	0		Favaloro_University	0		Graduate_School_of_Chinese_Academy_of_Agriculture_Science	0		Idaho_State	0		Indiana_University_of_Pennsylvania	0		Hallym_University	0		George_Fox_University	0		Heriot-Watt_University	0		Hamamatsu_University	0		Griffith_University	0		Henan_University	0		Hamburg_University_of_Technology	0		Henry_Poincare_University	0		Institut_National_Polytechnique_de_Lorraine	0
Indian_Institute_of_Technology_Bombay	0		Government_Medical_College_Mysore_University_India	0		Hengyang_Medical_College	0		Hallym_University	0		Fayetteville_State_University	0		Graduate_Theological_Union	0		Illinois_Medical_Center	0		Indiana_Wesleyan_University	0		Hamamatsu_University	0		George_Mason	0		Higher_Institute_of_Medical_Sciences	0		Hamburg_University_of_Technology	0		Grigore_T_Popa_University_of_Medicine_and_Pharmacy	0		Hengyang_Medical_College	0		Hamline_University	0		Heriot-Watt_University	0		Institut_National_Polytechnique_Toulouse	0
Indian_Institute_of_Technology_Delhi	0		Government_Medical_College_Patiala	0		Henry_Poincare_University	0		Hamamatsu_University	0		Federal_University_of_Ceara	0		Grambling_State_University	0		Illinois_School_of_Professional_Psychology	0		Industrial_Toxicology_Research_Center	0		Hamburg_University_of_Technology	0		Georgia_College_and_State_University	0		Highland_University	0		Hamline_University	0		Guangxi_Medical_University	0		Henry_Poincare_University	0		Hampton	0		Higher_Institute_of_Medical_Sciences	0		Institute_for_Continuing_Education_of_Physicians_Russia	0
Indian_Institute_of_Technology_Kanpur	0		Government_Medical_College_Srinagar_Jammu_and_Kashmir_India	0		Heriot-Watt_University	0		Hamburg_University_of_Technology	0		Federal_University_of_Espírito_Santo	0		Grand_Canyon_University	0		Illinois_State	0		Inner_Mongolia_Medical_University	0		Hamline_University	0		Georgia_Southern	0		Hiroshima_University	0		Hampton	0		Guangzhou_Medical_University	0		Heriot-Watt_University	0		Hannover_Medical_School_Hannover	0		Highland_University	0		Institute_for_Genetics_and_Microorganisms	0
Indian_Institute_of_Technology_Roorkee	0		Governors_State_University	0		Higher_Institute_of_Medical_Sciences	0		Hamline_University	0		Federal_University_of_Goias	0		Grant_Medical_College_and_Sir_JJ_Group_of_Hospitals	0		Illinois_Tech	0		Inner_Mongolia_University	0		Hampton	0		Georgia_State	0		Hirszfeld_Institute_and_Basel_Institute_for_Immunology	0		Hannover_Medical_School_Hannover	0		Guangzhou_University_of_Chinese_Medicine	0		Higher_Institute_of_Medical_Sciences	0		Hanover_College	0		Hiroshima_University	0		Institute_for_Genetics_and_Selection_of_Industrial_Microorganisms_Russia	0
Indian_Institute_of_Toxicology_Research	0		Graduate_School_and_University_Center_(CUNY)	0		Highland_University	0		Hampton	0		Federal_University_of_Mato_Grosso_do_Sul	0		Graz_University_of_Technology	0		Ilorin_University	0		INRIA-Sophia_Antipolis	0		Hannover_Medical_School_Hannover	0		Georgian_Academy_of_Sciences	0		Hofstra	0		Hanover_College	0		Gulhane_Military_Medical_School	0		Highland_University	0		Hanover_University_Germany	0		Hirszfeld_Institute_and_Basel_Institute_for_Immunology	0		Institute_for_Pharmazeutishe_Biologie	0
Indian_Statistical_Institute_Bengaluru	0		Graduate_School_of_Chinese_Academy_of_Agriculture_Science	0		Hiroshima_University	0		Hannover_Medical_School_Hannover	0		Federal_University_of_Pernambuco	0		Grenoble_Institute_of_Technology	0		IMMACULATA_UNIVERSITY	0		Instit_De_Medicina_Si_Farmacie	0		Hanover_College	0		German_Sport_University	0		Hokkaido_University	0		Hanover_University_Germany	0		Gunma_University	0		Hiroshima_University	0		Hanyang_University	0		Hofstra	0		Institute_for_Research_in_Fundamental_Sciences_Tehran_Iran	0
Indian_Veterinary_Research_Institute_Izatnagar_India	0		Graduate_Theological_Union	0		Hirszfeld_Institute_and_Basel_Institute_for_Immunology	0		Hanover_College	0		Federal_University_of_Rio_de_Janeiro	0		Griffith_University	0		Imperial_Cancer_Research_Fund	0		Institut_National_de_la_Recherche_Agronomique	0		Hanover_University_Germany	0		Gestalt_Institute	0		Hong_Kong_Baptist_University	0		Hanyang_University	0		Guntur_Medical_College	0		Hirszfeld_Institute_and_Basel_Institute_for_Immunology	0		Harbin_Institute_of_Technology	0		Hokkaido_University	0		Institute_of_Agroecology_and_Biotechnology	0
Indiana_State	0		Grambling_State_University	0		Hofstra	0		Hanover_University_Germany	0		Federal_University_of_Rio_Grande_do_Norte	0		Grigore_T_Popa_University_of_Medicine_and_Pharmacy	0		IMTECH	0		Institut_National_des_Sciences	0		Hanyang_University	0		Ghent_University	0		Hong_Kong_University_of_Science_and_Technology	0		Harbin_Institute_of_Technology	0		Guru_Nanak_Dev_University	0		Hofstra	0		Harbin_Medical_University	0		Hong_Kong_Baptist_University	0		Institute_of_Atomic_Physics	0
Indiana_Wesleyan_University	0		Grand_Canyon_University	0		Hokkaido_University	0		Hanyang_University	0		Federal_University_of_Rio_Grande_do_Sul	0		Guangxi_Medical_University	0		India-Nagpur_University	0		Institut_National_Polytechnique_de_Lorraine	0		Harbin_Institute_of_Technology	0		Gifu_University	0		Hoshi_University	0		Harbin_Medical_University	0		Gyeongsang_National_University	0		Hokkaido_University	0		Hardin-Simmons_University	0		Hong_Kong_University_of_Science_and_Technology	0		Institute_of_Biochemistry	0
Industrial_Toxicology_Research_Center	0		Grant_Medical_College_and_Sir_JJ_Group_of_Hospitals	0		Hong_Kong_Baptist_University	0		Harbin_Institute_of_Technology	0		Federal_University_of_Santa_Catarina	0		Guangzhou_Medical_University	0		Indian_Agricultural_Research_Institute	0		Institut_National_Polytechnique_Toulouse	0		Harbin_Medical_University	0		Glasgow_Caledonian_University	0		Howard	0		Hardin-Simmons_University	0		Hacettepe_University	0		Hong_Kong_Baptist_University	0		Harokopio_University	0		Hoshi_University	0		Institute_Of_Biochemistry_And_Biophysics_Polish_Academy_Of_Sciences	0
Inner_Mongolia_Medical_University	0		Graz_University_of_Technology	0		Hong_Kong_University_of_Science_and_Technology	0		Harbin_Medical_University	0		Federal_University_of_Santa_Maria	0		Guangzhou_University_of_Chinese_Medicine	0		Indian_Association_for_the_Cultivation_of_Science	0		Institute_for_Continuing_Education_of_Physicians_Russia	0		Hardin-Simmons_University	0		Goa_Medical_College	0		Huazhong_Agricultural_University	0		Harokopio_University	0		Hadassah_Medical_School	0		Hong_Kong_University_of_Science_and_Technology	0		Harrison_College	0		Howard	0		Institute_of_Biochemistry_and_Physiology_of_Microorganisms	0
Inner_Mongolia_University	0		Grenoble_Institute_of_Technology	0		Hoshi_University	0		Hardin-Simmons_University	0		Federal_University_of_Sao_Paulo	0		Gujarat_University	0		Indian_Institute_of_Chemical_Biology	0		Institute_for_Genetics_and_Microorganisms	0		Harokopio_University	0		Goethe_University_Frankfurt	0		Huazhong_University_of_Science_and_Technology	0		Harrison_College	0		Hahnemann_Medical_College_Philadelphia	0		Hoshi_University	0		Haryana_Agricultural_University	0		Huazhong_Agricultural_University	0		Institute_of_Biological_Physics_Pushchino	0
INRIA-Sophia_Antipolis	0		Griffith_University	0		Howard	0		Harokopio_University	0		Federal_University_of_Uberlandia	0		Gulhane_Military_Medical_School	0		Indian_Institute_Of_Chemical_Technology	0		Institute_for_Genetics_and_Selection_of_Industrial_Microorganisms_Russia	0		Harrison_College	0		Golden_Gate_University	0		Humboldt_University_of_Berlin	0		Haryana_Agricultural_University	0		Hallym_University	0		Howard	0		Havana_Advanced_Institute_Of_Medical_Sciences	0		Huazhong_University_of_Science_and_Technology	0		Institute_of_Biomedical_Problems_Moscow	0
Instit_De_Medicina_Si_Farmacie	0		Grigore_T_Popa_University_of_Medicine_and_Pharmacy	0		Huazhong_Agricultural_University	0		Harrison_College	0		Federal_University_of_Vicosa	0		Gunma_University	0		Indian_Institute_of_Science	0		Institute_for_Pharmazeutishe_Biologie	0		Haryana_Agricultural_University	0		Gonzaga	0		Hunan_Medical_University	0		Havana_Advanced_Institute_Of_Medical_Sciences	0		Hamamatsu_University	0		Huazhong_Agricultural_University	0		Haverford_College	0		Hunan_Medical_University	0		Institute_of_Bioorganic_Chemistry	0
Institut_National_de_la_Recherche_Agronomique	0		Guangxi_Medical_University	0		Huazhong_University_of_Science_and_Technology	0		Haryana_Agricultural_University	0		Ferris_State_University	0		Guntur_Medical_College	0		Indian_Institute_of_Technology	0		Institute_for_Research_in_Fundamental_Sciences_Tehran_Iran	0		Havana_Advanced_Institute_Of_Medical_Sciences	0		Gorakhpur_University	0		Hunan_Normal_University	0		Haverford_College	0		Hamburg_University_of_Technology	0		Huazhong_University_of_Science_and_Technology	0		Hawler_Medical_University	0		Hunan_Normal_University	0		Institute_of_Biotechnology	0
Institut_National_des_Sciences	0		Guangzhou_Medical_University	0		Humboldt_University_of_Berlin	0		Havana_Advanced_Institute_Of_Medical_Sciences	0		Fielding_Graduate	0		Guru_Nanak_Dev_University	0		Indian_Institute_of_Technology_Bombay	0		Institute_of_Agroecology_and_Biotechnology	0		Haverford_College	0		Government_Medical_College	0		Hunan_University	0		Hawler_Medical_University	0		Hamline_University	0		Humboldt_University_of_Berlin	0		Health_Policy_Institute	0		Hunan_University	0		Institute_of_Cancer_Research_London	0
Institut_National_Polytechnique_de_Lorraine	0		Guangzhou_University_of_Chinese_Medicine	0		Hunan_Medical_University	0		Haverford_College	0		Finch_University	0		Gyeongsang_National_University	0		Indian_Institute_of_Technology_Delhi	0		Institute_of_Atomic_Physics	0		Hawler_Medical_University	0		Government_Medical_College_Chandigarh_Punjab_University	0		Huntsman_Cancer_Institute	0		Health_Policy_Institute	0		Hampton	0		Hunan_Medical_University	0		Heat_and_Transfer_Institute	0		Huntsman_Cancer_Institute	0		Institute_of_Cell_Biophysics	0
Institut_National_Polytechnique_Toulouse	0		Gujarat_University	0		Hunan_Normal_University	0		Hawler_Medical_University	0		Finch_University_of_Health_Sciences_Chicago	0		Hacettepe_University	0		Indian_Institute_of_Technology_Kanpur	0		Institute_of_Biochemistry	0		Health_Policy_Institute	0		Government_Medical_College_Gulbarga_University_India	0		Hyogo_College_of_Medicine	0		Heat_and_Transfer_Institute	0		Hannover_Medical_School_Hannover	0		Hunan_Normal_University	0		Hebei_Medical_University	0		Hyogo_College_of_Medicine	0		Institute_of_Chemical_Kinetics_and_Combustion	0
Institute_for_Continuing_Education_of_Physicians_Russia	0		Gulhane_Military_Medical_School	0		Hunan_University	0		Health_Policy_Institute	0		First_Medical_School_University_of_Naples	0		Hadassah_Medical_School	0		Indian_Institute_of_Technology_Roorkee	0		Institute_Of_Biochemistry_And_Biophysics_Polish_Academy_Of_Sciences	0		Heat_and_Transfer_Institute	0		Government_Medical_College_Guru_Nanak_Dev_University_Amritsar_India	0		Ibero-American_University_Puebla	0		Hebei_Medical_University	0		Hanover_College	0		Hunan_University	0		Hebrew_University_of_Jerusalem	0		Ibero-American_University_Puebla	0		Institute_of_Chemical_Technology_Mumbai	0
Institute_for_Genetics_and_Microorganisms	0		Gunma_University	0		Huntsman_Cancer_Institute	0		Heat_and_Transfer_Institute	0		First_Moscow_State_Medical_University	0		Hahnemann_University_Hospital	0		Indian_Institute_of_Toxicology_Research	0		Institute_of_Biochemistry_and_Physiology_of_Microorganisms	0		Hebei_Medical_University	0		Government_Medical_College_Mysore_University_India	0		Icahn_School_of_Medicine	0		Heidelberg_University	0		Hanover_University_Germany	0		Huntsman_Cancer_Institute	0		Heidelberg_University	0		Idaho_State	0		Institute_of_Chemical_Technology_Prague	0
Institute_for_Genetics_and_Selection_of_Industrial_Microorganisms_Russia	0		Guntur_Medical_College	0		Hyogo_College_of_Medicine	0		Hebei_Medical_University	0		Flinders_University	0		Hallym_University	0		Indian_Statistical_Institute_Bengaluru	0		Institute_of_Biological_Physics_Pushchino	0		Heidelberg_University	0		Government_Medical_College_Patiala	0		Idaho_State	0		Heinrich-Heine_University	0		Hanyang_University	0		Hyogo_College_of_Medicine	0		Heinrich-Heine_University	0		Illinois_Medical_Center	0		Institute_of_Child_Psychology_at_the_University_of_Minnesota	0
Institute_for_Pharmazeutishe_Biologie	0		Guru_Nanak_Dev_University	0		Ibero-American_University_Puebla	0		Heidelberg_University	0		Florida_A&M	0		Hamamatsu_University	0		Indiana_State	0		Institute_of_Biomedical_Problems_Moscow	0		Heinrich-Heine_University	0		Government_Medical_College_Srinagar_Jammu_and_Kashmir_India	0		Illinois_Medical_Center	0		Hellenic_Pasteur_Institute	0		Harbin_Institute_of_Technology	0		Ibero-American_University_Puebla	0		Hellenic_Pasteur_Institute	0		Illinois_School_of_Professional_Psychology	0		Institute_of_Cytology_and_Genetics_Novosibirsk_Russia	0
Institute_for_Research_in_Fundamental_Sciences_Tehran_Iran	0		Gyeongsang_National_University	0		Icahn_School_of_Medicine	0		Heinrich-Heine_University	0		Florida_Atlantic	0		Hamburg_University_of_Technology	0		Indiana_University_of_Pennsylvania	0		Institute_of_Bioorganic_Chemistry	0		Hellenic_Pasteur_Institute	0		Governors_State_University	0		Illinois_School_of_Professional_Psychology	0		Helmholtz_Center_Munich	0		Harbin_Medical_University	0		Idaho_State	0		Helmholtz_Center_Munich	0		Illinois_State	0		Institute_of_Experimental_Botany_Minsk	0
Institute_of_Agroecology_and_Biotechnology	0		Hacettepe_University	0		Idaho_State	0		Hellenic_Pasteur_Institute	0		Florida_Institute_of_Technology	0		Hamline_University	0		Indiana_Wesleyan_University	0		Institute_of_Biotechnology	0		Helmholtz_Center_Munich	0		Graduate_School_and_University_Center_(CUNY)	0		Illinois_State	0		Helsinki_University_of_Technology	0		Hardin-Simmons_University	0		Illinois_Medical_Center	0		Helsinki_University_of_Technology	0		Illinois_Tech	0		Institute_of_Experimental_Medicine_St_Petersburg_Russia	0
Institute_of_Atomic_Physics	0		Hadassah_Medical_School	0		Illinois_Medical_Center	0		Helmholtz_Center_Munich	0		Florida_International	0		Hampton	0		Industrial_Toxicology_Research_Center	0		Institute_of_Cancer_Research_London	0		Helsinki_University_of_Technology	0		Graduate_School_of_Chinese_Academy_of_Agriculture_Science	0		Illinois_Tech	0		Henan_Medical_University	0		Harrison_College	0		Illinois_School_of_Professional_Psychology	0		Henan_Medical_University	0		Ilorin_University	0		Institute_of_Genetics_and_Animal_Breeding	0
Institute_of_Biochemistry	0		Hahnemann_Medical_College_Philadelphia	0		Illinois_School_of_Professional_Psychology	0		Helsinki_University_of_Technology	0		Fordham	0		Hannover_Medical_School_Hannover	0		Inner_Mongolia_Medical_University	0		Institute_of_Cell_Biophysics	0		Henan_Medical_University	0		Graduate_Theological_Union	0		Ilorin_University	0		Henan_University	0		Haryana_Agricultural_University	0		Illinois_State	0		Henan_University	0		IMMACULATA_UNIVERSITY	0		Institute_of_Genetics_and_Selection_of_Industrial_Microorganisms	0
Institute_of_Biochemistry_and_Physiology_of_Microorganisms	0		Hahnemann_University_Hospital	0		Illinois_State	0		Henan_Medical_University	0		Francois_Rabelais_University	0		Hanover_College	0		Inner_Mongolia_University	0		Institute_of_Chemical_Kinetics_and_Combustion	0		Henan_University	0		Grambling_State_University	0		IMMACULATA_UNIVERSITY	0		Hengyang_Medical_College	0		Havana_Advanced_Institute_Of_Medical_Sciences	0		Illinois_Tech	0		Hengyang_Medical_College	0		Imperial_Cancer_Research_Fund	0		Institute_Of_Genetics_Beijing	0
Institute_of_Biological_Physics_Pushchino	0		Hallym_University	0		Illinois_Tech	0		Henan_University	0		Franklin_Pierce_Law_Center	0		Hanover_University_Germany	0		INRIA-Sophia_Antipolis	0		Institute_of_Chemical_Technology_Mumbai	0		Hengyang_Medical_College	0		Grand_Canyon_University	0		Imperial_Cancer_Research_Fund	0		Henry_Poincare_University	0		Haverford_College	0		Ilorin_University	0		Henry_Poincare_University	0		IMTECH	0		Institute_of_Higher_Education_University_of_Georgia_Athens_Georgia	0
Institute_of_Biomedical_Problems_Moscow	0		Hamamatsu_University	0		Ilorin_University	0		Hengyang_Medical_College	0		Free_University_Berlin	0		Hanyang_University	0		Instit_De_Medicina_Si_Farmacie	0		Institute_of_Chemical_Technology_Prague	0		Henry_Poincare_University	0		Grant_Medical_College_and_Sir_JJ_Group_of_Hospitals	0		Imperial_College_London	0		Higher_Institute_of_Medical_Sciences	0		Hawler_Medical_University	0		IMMACULATA_UNIVERSITY	0		Heriot-Watt_University	0		India-Nagpur_University	0		Institute_of_Macromolecular_Chemistry_Prague	0
Institute_of_Bioorganic_Chemistry	0		Hamburg_University_of_Technology	0		IMMACULATA_UNIVERSITY	0		Henry_Poincare_University	0		Friedrich-Alexander_University_of_Erlangen-Nurnberg	0		Harbin_Institute_of_Technology	0		Institut_National_de_la_Recherche_Agronomique	0		Institute_of_Child_Psychology_at_the_University_of_Minnesota	0		Heriot-Watt_University	0		Graz_University_of_Technology	0		IMTECH	0		Highland_University	0		Health_Policy_Institute	0		Imperial_Cancer_Research_Fund	0		Higher_Institute_of_Medical_Sciences	0		Indian_Agricultural_Research_Institute	0		Institute_of_Mathematics_Swiss_Federal_Institute_of_Technology	0
Institute_of_Biotechnology	0		Hamline_University	0		Imperial_Cancer_Research_Fund	0		Heriot-Watt_University	0		Friedrich-Schiller_University_of_Jena	0		Harbin_Medical_University	0		Institut_National_des_Sciences	0		Institute_of_Cytology_and_Genetics_Novosibirsk_Russia	0		Higher_Institute_of_Medical_Sciences	0		Grenoble_Institute_of_Technology	0		India-Nagpur_University	0		Hiroshima_University	0		Heat_and_Transfer_Institute	0		Imperial_College_London	0		Highland_University	0		Indian_Association_for_the_Cultivation_of_Science	0		Institute_of_Medical_Sciences_Banaras_Hindu_University	0
Institute_of_Cancer_Research_London	0		Hampton	0		IMTECH	0		Higher_Institute_of_Medical_Sciences	0		Frontier_Nursing_University	0		Hardin-Simmons_University	0		Institut_National_Polytechnique_de_Lorraine	0		Institute_of_Experimental_Botany_Minsk	0		Highland_University	0		Griffith_University	0		Indian_Agricultural_Research_Institute	0		Hirszfeld_Institute_and_Basel_Institute_for_Immunology	0		Hebei_Medical_University	0		IMTECH	0		Hiroshima_University	0		Indian_Institute_of_Chemical_Biology	0		Institute_of_Medical_Sciences_Lucknow_India	0
Institute_of_Cell_Biophysics	0		Hannover_Medical_School_Hannover	0		India-Nagpur_University	0		Highland_University	0		Frumkin_Institute_of_Electrochemistry	0		Harokopio_University	0		Institut_National_Polytechnique_Toulouse	0		Institute_of_Experimental_Medicine_St_Petersburg_Russia	0		Hiroshima_University	0		Grigore_T_Popa_University_of_Medicine_and_Pharmacy	0		Indian_Association_for_the_Cultivation_of_Science	0		Hofstra	0		Heidelberg_University	0		India-Nagpur_University	0		Hirszfeld_Institute_and_Basel_Institute_for_Immunology	0		Indian_Institute_Of_Chemical_Technology	0		Institute_of_Medical_Sciences_Varanasi	0
Institute_of_Chemical_Kinetics_and_Combustion	0		Hanover_College	0		Indian_Agricultural_Research_Institute	0		Hiroshima_University	0		Fujian_Agriculture_and_Forestry_University	0		Harrison_College	0		Institute_for_Continuing_Education_of_Physicians_Russia	0		Institute_of_Genetics_and_Animal_Breeding	0		Hirszfeld_Institute_and_Basel_Institute_for_Immunology	0		Guangxi_Medical_University	0		Indian_Institute_of_Chemical_Biology	0		Hong_Kong_Baptist_University	0		Hellenic_Pasteur_Institute	0		Indian_Agricultural_Research_Institute	0		Hofstra	0		Indian_Institute_of_Science	0		Institute_of_Medicine_and_Pharmacy_Bucharest	0
Institute_of_Chemical_Technology_Mumbai	0		Hanover_University_Germany	0		Indian_Association_for_the_Cultivation_of_Science	0		Hirszfeld_Institute_and_Basel_Institute_for_Immunology	0		Fujian_Medical_University	0		Haryana_Agricultural_University	0		Institute_for_Genetics_and_Microorganisms	0		Institute_of_Genetics_and_Selection_of_Industrial_Microorganisms	0		Hofstra	0		Guangzhou_Medical_University	0		Indian_Institute_Of_Chemical_Technology	0		Hong_Kong_University_of_Science_and_Technology	0		Helmholtz_Center_Munich	0		Indian_Association_for_the_Cultivation_of_Science	0		Hokkaido_University	0		Indian_Institute_of_Technology	0		Institute_of_Microbial_Technology_Chandigarh_India	0
Institute_of_Chemical_Technology_Prague	0		Hanyang_University	0		Indian_Institute_of_Chemical_Biology	0		Hofstra	0		Fujita_Health_University	0		Havana_Advanced_Institute_Of_Medical_Sciences	0		Institute_for_Genetics_and_Selection_of_Industrial_Microorganisms_Russia	0		Institute_Of_Genetics_Beijing	0		Hokkaido_University	0		Guangzhou_University_of_Chinese_Medicine	0		Indian_Institute_of_Technology	0		Hoshi_University	0		Helsinki_University_of_Technology	0		Indian_Institute_of_Chemical_Biology	0		Hong_Kong_Baptist_University	0		Indian_Institute_of_Technology_Bombay	0		Institute_of_Microbiology_of_the_Czech_Academy_of_Sciences	0
Institute_of_Child_Psychology_at_the_University_of_Minnesota	0		Harbin_Institute_of_Technology	0		Indian_Institute_Of_Chemical_Technology	0		Hokkaido_University	0		Fukui_Medical_University_of_Japan	0		Haverford_College	0		Institute_for_Pharmazeutishe_Biologie	0		Institute_of_Higher_Education_University_of_Georgia_Athens_Georgia	0		Hong_Kong_Baptist_University	0		Gujarat_University	0		Indian_Institute_of_Technology_Bombay	0		Howard	0		Henan_Medical_University	0		Indian_Institute_Of_Chemical_Technology	0		Hong_Kong_University_of_Science_and_Technology	0		Indian_Institute_of_Technology_Delhi	0		Institute_Of_Molecular_Biology_And_Genetics_Ukraine	0
Institute_of_Cytology_and_Genetics_Novosibirsk_Russia	0		Harbin_Medical_University	0		Indian_Institute_of_Technology	0		Hong_Kong_Baptist_University	0		Fukushima_Medical_University	0		Hawler_Medical_University	0		Institute_for_Research_in_Fundamental_Sciences_Tehran_Iran	0		Institute_of_Macromolecular_Chemistry_Prague	0		Hong_Kong_University_of_Science_and_Technology	0		Gulhane_Military_Medical_School	0		Indian_Institute_of_Technology_Delhi	0		Huazhong_Agricultural_University	0		Henan_University	0		Indian_Institute_of_Science	0		Hoshi_University	0		Indian_Institute_of_Technology_Kanpur	0		Institute_of_Molecular_Genetics_Moscow	0
Institute_of_Experimental_Botany_Minsk	0		Hardin-Simmons_University	0		Indian_Institute_of_Technology_Bombay	0		Hong_Kong_University_of_Science_and_Technology	0		Fuller_Graduate_School_of_Psychology_Pasadena_CA	0		Health_Policy_Institute	0		Institute_of_Agroecology_and_Biotechnology	0		Institute_of_Mathematics_Swiss_Federal_Institute_of_Technology	0		Hoshi_University	0		Gunma_University	0		Indian_Institute_of_Technology_Kanpur	0		Humboldt_University_of_Berlin	0		Hengyang_Medical_College	0		Indian_Institute_of_Technology	0		Huazhong_Agricultural_University	0		Indian_Institute_of_Technology_Roorkee	0		Institute_of_Mother_and_Child_Warsaw	0
Institute_of_Experimental_Medicine_St_Petersburg_Russia	0		Harokopio_University	0		Indian_Institute_of_Technology_Delhi	0		Hoshi_University	0		Fuller_Theological_Seminary	0		Heat_and_Transfer_Institute	0		Institute_of_Atomic_Physics	0		Institute_of_Medical_Sciences_Banaras_Hindu_University	0		Howard	0		Guntur_Medical_College	0		Indian_Institute_of_Technology_Roorkee	0		Hunan_Medical_University	0		Henry_Poincare_University	0		Indian_Institute_of_Technology_Bombay	0		Huazhong_University_of_Science_and_Technology	0		Indian_Institute_of_Toxicology_Research	0		Institute_of_Normal_Physiology_Moscow	0
Institute_of_Genetics_and_Animal_Breeding	0		Harrison_College	0		Indian_Institute_of_Technology_Kanpur	0		Howard	0		Gajra_Raja_Medical_College	0		Hebei_Medical_University	0		Institute_of_Biochemistry	0		Institute_of_Medical_Sciences_Lucknow_India	0		Huazhong_Agricultural_University	0		Guru_Nanak_Dev_University	0		Indian_Institute_of_Toxicology_Research	0		Hunan_Normal_University	0		Heriot-Watt_University	0		Indian_Institute_of_Technology_Delhi	0		Humboldt_University_of_Berlin	0		Indian_Statistical_Institute_Bengaluru	0		Institute_of_Nuclear_Physics_Calcutta_India	0
Institute_of_Genetics_and_Selection_of_Industrial_Microorganisms	0		Haryana_Agricultural_University	0		Indian_Institute_of_Technology_Roorkee	0		Huazhong_Agricultural_University	0		Gandhi_Medical_College_Hyderabad_India	0		Hebrew_University_of_Jerusalem	0		Institute_Of_Biochemistry_And_Biophysics_Polish_Academy_Of_Sciences	0		Institute_of_Medical_Sciences_Varanasi	0		Huazhong_University_of_Science_and_Technology	0		Gyeongsang_National_University	0		Indian_Statistical_Institute_Bengaluru	0		Hunan_University	0		Higher_Institute_of_Medical_Sciences	0		Indian_Institute_of_Technology_Kanpur	0		Hunan_Medical_University	0		Indian_Veterinary_Research_Institute_Izatnagar_India	0		Institute_Of_Pharmaceutical_Chemistry	0
Institute_Of_Genetics_Beijing	0		Havana_Advanced_Institute_Of_Medical_Sciences	0		Indian_Institute_of_Toxicology_Research	0		Huazhong_University_of_Science_and_Technology	0		Ganesh_Shankar_Vidyarthi_Memorial_Medical_College	0		Heidelberg_University	0		Institute_of_Biochemistry_and_Physiology_of_Microorganisms	0		Institute_of_Medicine_and_Pharmacy_Bucharest	0		Humboldt_University_of_Berlin	0		Hacettepe_University	0		Indian_Veterinary_Research_Institute_Izatnagar_India	0		Huntsman_Cancer_Institute	0		Highland_University	0		Indian_Institute_of_Technology_Roorkee	0		Hunan_Normal_University	0		Indiana_State	0		Institute_of_Pharmacology_Moscow_Russia	0
Institute_of_Higher_Education_University_of_Georgia_Athens_Georgia	0		Haverford_College	0		Indian_Statistical_Institute_Bengaluru	0		Humboldt_University_of_Berlin	0		Gardner-Webb_University	0		Heinrich-Heine_University	0		Institute_of_Biological_Physics_Pushchino	0		Institute_of_Microbial_Technology_Chandigarh_India	0		Hunan_Medical_University	0		Hadassah_Medical_School	0		Indiana_State	0		Hyogo_College_of_Medicine	0		Hiroshima_University	0		Indian_Institute_of_Toxicology_Research	0		Hunan_University	0		Indiana_University_of_Pennsylvania	0		Institute_of_Pharmacy_&_Biochemistry_Prague_Czech	0
Institute_of_Macromolecular_Chemistry_Prague	0		Hawler_Medical_University	0		Indian_Veterinary_Research_Institute_Izatnagar_India	0		Hunan_Medical_University	0		Gauhati_University_Gauhati	0		Hellenic_Pasteur_Institute	0		Institute_of_Biomedical_Problems_Moscow	0		Institute_of_Microbiology_of_the_Czech_Academy_of_Sciences	0		Hunan_Normal_University	0		Hahnemann_Medical_College_Philadelphia	0		Indiana_University_of_Pennsylvania	0		Ibero-American_University_Puebla	0		Hirszfeld_Institute_and_Basel_Institute_for_Immunology	0		Indian_Statistical_Institute_Bengaluru	0		Huntsman_Cancer_Institute	0		Indiana_Wesleyan_University	0		Institute_of_Physics_Bucharest	0
Institute_of_Mathematics_Swiss_Federal_Institute_of_Technology	0		Health_Policy_Institute	0		Indiana_State	0		Hunan_Normal_University	0		Gazi_Üniversitesi	0		Helmholtz_Center_Munich	0		Institute_of_Bioorganic_Chemistry	0		Institute_Of_Molecular_Biology_And_Genetics_Ukraine	0		Hunan_University	0		Hahnemann_University_Hospital	0		Indiana_Wesleyan_University	0		Icahn_School_of_Medicine	0		Hofstra	0		Indian_Veterinary_Research_Institute_Izatnagar_India	0		Hyogo_College_of_Medicine	0		Industrial_Toxicology_Research_Center	0		Institute_of_Physiology	0
Institute_of_Medical_Sciences_Banaras_Hindu_University	0		Heat_and_Transfer_Institute	0		Indiana_University_of_Pennsylvania	0		Hunan_University	0		Gdansk_Medical_University	0		Helsinki_University_of_Technology	0		Institute_of_Biotechnology	0		Institute_of_Molecular_Genetics_Moscow	0		Huntsman_Cancer_Institute	0		Hallym_University	0		Industrial_Toxicology_Research_Center	0		Idaho_State	0		Hokkaido_University	0		Indiana_State	0		Ibero-American_University_Puebla	0		Inner_Mongolia_Medical_University	0		Institute_of_Toxicology_St_Petersburg	0
Institute_of_Medical_Sciences_Lucknow_India	0		Hebei_Medical_University	0		Indiana_Wesleyan_University	0		Huntsman_Cancer_Institute	0		George_Fox_University	0		Henan_Medical_University	0		Institute_of_Cancer_Research_London	0		Institute_of_Mother_and_Child_Warsaw	0		Hyogo_College_of_Medicine	0		Hamamatsu_University	0		Inner_Mongolia_Medical_University	0		Illinois_Medical_Center	0		Hong_Kong_Baptist_University	0		Indiana_University_of_Pennsylvania	0		Icahn_School_of_Medicine	0		Inner_Mongolia_University	0		Institute_of_Tuberculosis	0
Institute_of_Medical_Sciences_Varanasi	0		Heidelberg_University	0		Industrial_Toxicology_Research_Center	0		Hyogo_College_of_Medicine	0		George_Mason	0		Henan_University	0		Institute_of_Cell_Biophysics	0		Institute_of_Normal_Physiology_Moscow	0		Ibero-American_University_Puebla	0		Hamburg_University_of_Technology	0		Inner_Mongolia_University	0		Illinois_School_of_Professional_Psychology	0		Hong_Kong_University_of_Science_and_Technology	0		Indiana_Wesleyan_University	0		Idaho_State	0		INRIA-Sophia_Antipolis	0		Institute_of_Virology	0
Institute_of_Medicine_and_Pharmacy_Bucharest	0		Heinrich-Heine_University	0		Inner_Mongolia_Medical_University	0		Ibero-American_University_Puebla	0		Georgia_College_and_State_University	0		Hengyang_Medical_College	0		Institute_of_Chemical_Kinetics_and_Combustion	0		Institute_of_Nuclear_Physics_Calcutta_India	0		Icahn_School_of_Medicine	0		Hamline_University	0		INRIA-Sophia_Antipolis	0		Illinois_State	0		Hoshi_University	0		Industrial_Toxicology_Research_Center	0		Illinois_Medical_Center	0		Instit_De_Medicina_Si_Farmacie	0		Institute_of_Virology_Chinese_Academy_of_Preventive_Medicine	0
Institute_of_Microbial_Technology_Chandigarh_India	0		Hellenic_Pasteur_Institute	0		Inner_Mongolia_University	0		Idaho_State	0		Georgia_Southern	0		Henry_Poincare_University	0		Institute_of_Chemical_Technology_Mumbai	0		Institute_Of_Pharmaceutical_Chemistry	0		Idaho_State	0		Hampton	0		Instit_De_Medicina_Si_Farmacie	0		Illinois_Tech	0		Howard	0		Inner_Mongolia_Medical_University	0		Illinois_School_of_Professional_Psychology	0		Institut_National_de_la_Recherche_Agronomique	0		Institute_of_Virology_Glasgow	0
Institute_of_Microbiology_of_the_Czech_Academy_of_Sciences	0		Helmholtz_Center_Munich	0		INRIA-Sophia_Antipolis	0		Illinois_Medical_Center	0		Georgian_Academy_of_Sciences	0		Heriot-Watt_University	0		Institute_of_Chemical_Technology_Prague	0		Institute_of_Pharmacology_Moscow_Russia	0		Illinois_Medical_Center	0		Hannover_Medical_School_Hannover	0		Institut_National_de_la_Recherche_Agronomique	0		Ilorin_University	0		Huazhong_Agricultural_University	0		Inner_Mongolia_University	0		Illinois_State	0		Institut_National_des_Sciences	0		Institute_Theoretical_and_Experimental_Biophysics	0
Institute_Of_Molecular_Biology_And_Genetics_Ukraine	0		Henan_Medical_University	0		Instit_De_Medicina_Si_Farmacie	0		Illinois_School_of_Professional_Psychology	0		German_Sport_University	0		Higher_Institute_of_Medical_Sciences	0		Institute_of_Child_Psychology_at_the_University_of_Minnesota	0		Institute_of_Pharmacy_&_Biochemistry_Prague_Czech	0		Illinois_School_of_Professional_Psychology	0		Hanover_College	0		Institut_National_des_Sciences	0		IMMACULATA_UNIVERSITY	0		Huazhong_University_of_Science_and_Technology	0		INRIA-Sophia_Antipolis	0		Ilorin_University	0		Institut_National_Polytechnique_de_Lorraine	0		Institution_of_Medical_Genetics_Moscow	0
Institute_of_Molecular_Genetics_Moscow	0		Henan_University	0		Institut_National_de_la_Recherche_Agronomique	0		Illinois_State	0		Gestalt_Institute	0		Highland_University	0		Institute_of_Cytology_and_Genetics_Novosibirsk_Russia	0		Institute_of_Physics_Bucharest	0		Illinois_State	0		Hanover_University_Germany	0		Institut_National_Polytechnique_de_Lorraine	0		Imperial_Cancer_Research_Fund	0		Humboldt_University_of_Berlin	0		Instit_De_Medicina_Si_Farmacie	0		IMMACULATA_UNIVERSITY	0		Institut_National_Polytechnique_Toulouse	0		Instituto_Leloir	0
Institute_of_Mother_and_Child_Warsaw	0		Hengyang_Medical_College	0		Institut_National_des_Sciences	0		Ilorin_University	0		Ghent_University	0		Hiroshima_University	0		Institute_of_Experimental_Botany_Minsk	0		Institute_of_Physiology	0		Ilorin_University	0		Hanyang_University	0		Institut_National_Polytechnique_Toulouse	0		IMTECH	0		Hunan_Medical_University	0		Institut_National_de_la_Recherche_Agronomique	0		Imperial_Cancer_Research_Fund	0		Institute_for_Continuing_Education_of_Physicians_Russia	0		Instituto_Politécnico_Nacional	0
Institute_of_Normal_Physiology_Moscow	0		Henry_Poincare_University	0		Institut_National_Polytechnique_de_Lorraine	0		IMMACULATA_UNIVERSITY	0		Gifu_University	0		Hirszfeld_Institute_and_Basel_Institute_for_Immunology	0		Institute_of_Experimental_Medicine_St_Petersburg_Russia	0		Institute_of_Toxicology_St_Petersburg	0		IMMACULATA_UNIVERSITY	0		Harbin_Institute_of_Technology	0		Institute_for_Continuing_Education_of_Physicians_Russia	0		India-Nagpur_University	0		Hunan_Normal_University	0		Institut_National_des_Sciences	0		IMTECH	0		Institute_for_Genetics_and_Microorganisms	0		Instituto_Tecnologico_De_Santo_Domingo	0
Institute_of_Nuclear_Physics_Calcutta_India	0		Heriot-Watt_University	0		Institut_National_Polytechnique_Toulouse	0		Imperial_Cancer_Research_Fund	0		Glasgow_Caledonian_University	0		Hofstra	0		Institute_of_Genetics_and_Animal_Breeding	0		Institute_of_Tuberculosis	0		Imperial_Cancer_Research_Fund	0		Harbin_Medical_University	0		Institute_for_Genetics_and_Microorganisms	0		Indian_Agricultural_Research_Institute	0		Hunan_University	0		Institut_National_Polytechnique_de_Lorraine	0		India-Nagpur_University	0		Institute_for_Genetics_and_Selection_of_Industrial_Microorganisms_Russia	0		Instituto_Tecnologico_y_de_Estudios_Superiores_de_Monterrey	0
Institute_Of_Pharmaceutical_Chemistry	0		Higher_Institute_of_Medical_Sciences	0		Institute_for_Continuing_Education_of_Physicians_Russia	0		IMTECH	0		Goa_Medical_College	0		Hokkaido_University	0		Institute_of_Genetics_and_Selection_of_Industrial_Microorganisms	0		Institute_of_Virology	0		Imperial_College_London	0		Hardin-Simmons_University	0		Institute_for_Genetics_and_Selection_of_Industrial_Microorganisms_Russia	0		Indian_Association_for_the_Cultivation_of_Science	0		Huntsman_Cancer_Institute	0		Institut_National_Polytechnique_Toulouse	0		Indian_Agricultural_Research_Institute	0		Institute_for_Pharmazeutishe_Biologie	0		Instituto_Venezolano_de_Investigaciones_Cientificas	0
Institute_of_Pharmacology_Moscow_Russia	0		Highland_University	0		Institute_for_Genetics_and_Microorganisms	0		India-Nagpur_University	0		Goethe_University_Frankfurt	0		Hong_Kong_Baptist_University	0		Institute_Of_Genetics_Beijing	0		Institute_of_Virology_Chinese_Academy_of_Preventive_Medicine	0		IMTECH	0		Harokopio_University	0		Institute_for_Pharmazeutishe_Biologie	0		Indian_Institute_of_Chemical_Biology	0		Hyogo_College_of_Medicine	0		Institute_for_Continuing_Education_of_Physicians_Russia	0		Indian_Association_for_the_Cultivation_of_Science	0		Institute_for_Research_in_Fundamental_Sciences_Tehran_Iran	0		International_Centre_for_Genetic_Engineering_and_Biotechnology	0
Institute_of_Pharmacy_&_Biochemistry_Prague_Czech	0		Hiroshima_University	0		Institute_for_Genetics_and_Selection_of_Industrial_Microorganisms_Russia	0		Indian_Agricultural_Research_Institute	0		Golden_Gate_University	0		Hong_Kong_University_of_Science_and_Technology	0		Institute_of_Higher_Education_University_of_Georgia_Athens_Georgia	0		Institute_of_Virology_Glasgow	0		India-Nagpur_University	0		Harrison_College	0		Institute_for_Research_in_Fundamental_Sciences_Tehran_Iran	0		Indian_Institute_Of_Chemical_Technology	0		Ibero-American_University_Puebla	0		Institute_for_Genetics_and_Microorganisms	0		Indian_Institute_of_Chemical_Biology	0		Institute_of_Agroecology_and_Biotechnology	0		International_Institute_for_Population_Sciences_Bombay_India	0
Institute_of_Physics_Bucharest	0		Hirszfeld_Institute_and_Basel_Institute_for_Immunology	0		Institute_for_Pharmazeutishe_Biologie	0		Indian_Association_for_the_Cultivation_of_Science	0		Gonzaga	0		Hoshi_University	0		Institute_of_Macromolecular_Chemistry_Prague	0		Institute_Theoretical_and_Experimental_Biophysics	0		Indian_Agricultural_Research_Institute	0		Haryana_Agricultural_University	0		Institute_of_Agroecology_and_Biotechnology	0		Indian_Institute_of_Technology	0		Idaho_State	0		Institute_for_Genetics_and_Selection_of_Industrial_Microorganisms_Russia	0		Indian_Institute_Of_Chemical_Technology	0		Institute_of_Atomic_Physics	0		International_School_For_Advanced_Studies	0
Institute_of_Physiology	0		Hokkaido_University	0		Institute_for_Research_in_Fundamental_Sciences_Tehran_Iran	0		Indian_Institute_of_Chemical_Biology	0		Gorakhpur_University	0		Howard	0		Institute_of_Mathematics_Swiss_Federal_Institute_of_Technology	0		Institution_of_Medical_Genetics_Moscow	0		Indian_Association_for_the_Cultivation_of_Science	0		Havana_Advanced_Institute_Of_Medical_Sciences	0		Institute_of_Atomic_Physics	0		Indian_Institute_of_Technology_Bombay	0		Illinois_Medical_Center	0		Institute_for_Pharmazeutishe_Biologie	0		Indian_Institute_of_Science	0		Institute_of_Biochemistry	0		Ioffe_Institute_of_Physics_and_Technology_Leningrad	0
Institute_of_Toxicology_St_Petersburg	0		Hong_Kong_Baptist_University	0		Institute_of_Agroecology_and_Biotechnology	0		Indian_Institute_Of_Chemical_Technology	0		Government_Medical_College	0		Huazhong_Agricultural_University	0		Institute_of_Medical_Sciences_Banaras_Hindu_University	0		Instituto_Leloir	0		Indian_Institute_of_Chemical_Biology	0		Haverford_College	0		Institute_of_Biochemistry	0		Indian_Institute_of_Technology_Delhi	0		Illinois_School_of_Professional_Psychology	0		Institute_for_Research_in_Fundamental_Sciences_Tehran_Iran	0		Indian_Institute_of_Technology	0		Institute_Of_Biochemistry_And_Biophysics_Polish_Academy_Of_Sciences	0		Iowa_State	0
Institute_of_Tuberculosis	0		Hong_Kong_University_of_Science_and_Technology	0		Institute_of_Atomic_Physics	0		Indian_Institute_of_Science	0		Government_Medical_College_Chandigarh_Punjab_University	0		Huazhong_University_of_Science_and_Technology	0		Institute_of_Medical_Sciences_Lucknow_India	0		Instituto_Politécnico_Nacional	0		Indian_Institute_Of_Chemical_Technology	0		Hawler_Medical_University	0		Institute_Of_Biochemistry_And_Biophysics_Polish_Academy_Of_Sciences	0		Indian_Institute_of_Technology_Kanpur	0		Illinois_State	0		Institute_of_Agroecology_and_Biotechnology	0		Indian_Institute_of_Technology_Bombay	0		Institute_of_Biochemistry_and_Physiology_of_Microorganisms	0		IP_Pavlov_Leningrad_Medical_University	0
Institute_of_Virology	0		Hoshi_University	0		Institute_of_Biochemistry	0		Indian_Institute_of_Technology	0		Government_Medical_College_Gulbarga_University_India	0		Humboldt_University_of_Berlin	0		Institute_of_Medical_Sciences_Varanasi	0		Instituto_Tecnologico_De_Santo_Domingo	0		Indian_Institute_of_Science	0		Health_Policy_Institute	0		Institute_of_Biochemistry_and_Physiology_of_Microorganisms	0		Indian_Institute_of_Technology_Roorkee	0		Illinois_Tech	0		Institute_of_Atomic_Physics	0		Indian_Institute_of_Technology_Delhi	0		Institute_of_Biological_Physics_Pushchino	0		Islamic_Azad_University	0
Institute_of_Virology_Chinese_Academy_of_Preventive_Medicine	0		Huazhong_Agricultural_University	0		Institute_Of_Biochemistry_And_Biophysics_Polish_Academy_Of_Sciences	0		Indian_Institute_of_Technology_Bombay	0		Government_Medical_College_Guru_Nanak_Dev_University_Amritsar_India	0		Hunan_Medical_University	0		Institute_of_Medicine_and_Pharmacy_Bucharest	0		Instituto_Tecnologico_y_de_Estudios_Superiores_de_Monterrey	0		Indian_Institute_of_Technology	0		Heat_and_Transfer_Institute	0		Institute_of_Biological_Physics_Pushchino	0		Indian_Institute_of_Toxicology_Research	0		Ilorin_University	0		Institute_of_Biochemistry	0		Indian_Institute_of_Technology_Kanpur	0		Institute_of_Biomedical_Problems_Moscow	0		Istanbul_Technical_University	0
Institute_of_Virology_Glasgow	0		Huazhong_University_of_Science_and_Technology	0		Institute_of_Biochemistry_and_Physiology_of_Microorganisms	0		Indian_Institute_of_Technology_Delhi	0		Government_Medical_College_Mysore_University_India	0		Hunan_Normal_University	0		Institute_of_Microbial_Technology_Chandigarh_India	0		Instituto_Venezolano_de_Investigaciones_Cientificas	0		Indian_Institute_of_Technology_Bombay	0		Hebei_Medical_University	0		Institute_of_Biomedical_Problems_Moscow	0		Indian_Statistical_Institute_Bengaluru	0		IMMACULATA_UNIVERSITY	0		Institute_Of_Biochemistry_And_Biophysics_Polish_Academy_Of_Sciences	0		Indian_Institute_of_Technology_Roorkee	0		Institute_of_Bioorganic_Chemistry	0		Istanbul_University	0
Institute_Theoretical_and_Experimental_Biophysics	0		Hunan_Medical_University	0		Institute_of_Biological_Physics_Pushchino	0		Indian_Institute_of_Technology_Kanpur	0		Government_Medical_College_Patiala	0		Hunan_University	0		Institute_of_Microbiology_of_the_Czech_Academy_of_Sciences	0		International_Centre_for_Genetic_Engineering_and_Biotechnology	0		Indian_Institute_of_Technology_Delhi	0		Heidelberg_University	0		Institute_of_Bioorganic_Chemistry	0		Indian_Veterinary_Research_Institute_Izatnagar_India	0		Imperial_Cancer_Research_Fund	0		Institute_of_Biochemistry_and_Physiology_of_Microorganisms	0		Indian_Institute_of_Toxicology_Research	0		Institute_of_Biotechnology	0		Italian_Institute_of_Technology	0
Institution_of_Medical_Genetics_Moscow	0		Hunan_Normal_University	0		Institute_of_Biomedical_Problems_Moscow	0		Indian_Institute_of_Technology_Roorkee	0		Government_Medical_College_Srinagar_Jammu_and_Kashmir_India	0		Huntsman_Cancer_Institute	0		Institute_Of_Molecular_Biology_And_Genetics_Ukraine	0		International_Institute_for_Population_Sciences_Bombay_India	0		Indian_Institute_of_Technology_Kanpur	0		Heinrich-Heine_University	0		Institute_of_Biotechnology	0		Indiana_State	0		Imperial_College_London	0		Institute_of_Biological_Physics_Pushchino	0		Indian_Statistical_Institute_Bengaluru	0		Institute_of_Cancer_Research_London	0		Italy_University	0
Instituto_Leloir	0		Hunan_University	0		Institute_of_Bioorganic_Chemistry	0		Indian_Institute_of_Toxicology_Research	0		Governors_State_University	0		Hyogo_College_of_Medicine	0		Institute_of_Molecular_Genetics_Moscow	0		International_School_For_Advanced_Studies	0		Indian_Institute_of_Technology_Roorkee	0		Hellenic_Pasteur_Institute	0		Institute_of_Cancer_Research_London	0		Indiana_University_of_Pennsylvania	0		IMTECH	0		Institute_of_Biomedical_Problems_Moscow	0		Indian_Veterinary_Research_Institute_Izatnagar_India	0		Institute_of_Cell_Biophysics	0		Ithaca_College	0
Instituto_Politécnico_Nacional	0		Huntsman_Cancer_Institute	0		Institute_of_Biotechnology	0		Indian_Statistical_Institute_Bengaluru	0		Graduate_School_and_University_Center_(CUNY)	0		Ibero-American_University_Puebla	0		Institute_of_Mother_and_Child_Warsaw	0		Ioffe_Institute_of_Physics_and_Technology_Leningrad	0		Indian_Institute_of_Toxicology_Research	0		Helmholtz_Center_Munich	0		Institute_of_Cell_Biophysics	0		Indiana_Wesleyan_University	0		India-Nagpur_University	0		Institute_of_Bioorganic_Chemistry	0		Indiana_State	0		Institute_of_Chemical_Kinetics_and_Combustion	0		Iuliu_Hatieganu_University_of_Medicine_and_Pharmacy	0
Instituto_Tecnologico_De_Santo_Domingo	0		Hyogo_College_of_Medicine	0		Institute_of_Cancer_Research_London	0		Indian_Veterinary_Research_Institute_Izatnagar_India	0		Graduate_School_of_Chinese_Academy_of_Agriculture_Science	0		Idaho_State	0		Institute_of_Normal_Physiology_Moscow	0		Iowa_State	0		Indian_Statistical_Institute_Bengaluru	0		Helsinki_University_of_Technology	0		Institute_of_Chemical_Kinetics_and_Combustion	0		Industrial_Toxicology_Research_Center	0		Indian_Agricultural_Research_Institute	0		Institute_of_Biotechnology	0		Indiana_University_of_Pennsylvania	0		Institute_of_Chemical_Technology_Mumbai	0		IUPUI	0
Instituto_Tecnologico_y_de_Estudios_Superiores_de_Monterrey	0		Ibero-American_University_Puebla	0		Institute_of_Cell_Biophysics	0		Indiana_State	0		Graduate_Theological_Union	0		Illinois_Medical_Center	0		Institute_of_Nuclear_Physics_Calcutta_India	0		IP_Pavlov_Leningrad_Medical_University	0		Indian_Veterinary_Research_Institute_Izatnagar_India	0		Henan_Medical_University	0		Institute_of_Chemical_Technology_Mumbai	0		Inner_Mongolia_Medical_University	0		Indian_Association_for_the_Cultivation_of_Science	0		Institute_of_Cell_Biophysics	0		Indiana_Wesleyan_University	0		Institute_of_Chemical_Technology_Prague	0		Ivanovsky_Institute_of_Virology_Moscow	0
Instituto_Venezolano_de_Investigaciones_Cientificas	0		Idaho_State	0		Institute_of_Chemical_Kinetics_and_Combustion	0		Indiana_University_of_Pennsylvania	0		Grambling_State_University	0		Illinois_School_of_Professional_Psychology	0		Institute_Of_Pharmaceutical_Chemistry	0		Islamic_Azad_University	0		Indiana_State	0		Henan_University	0		Institute_of_Chemical_Technology_Prague	0		Inner_Mongolia_University	0		Indian_Institute_of_Chemical_Biology	0		Institute_of_Chemical_Kinetics_and_Combustion	0		Industrial_Toxicology_Research_Center	0		Institute_of_Child_Psychology_at_the_University_of_Minnesota	0		Iwate_University_Japan	0
International_Centre_for_Genetic_Engineering_and_Biotechnology	0		Illinois_Medical_Center	0		Institute_of_Chemical_Technology_Mumbai	0		Indiana_Wesleyan_University	0		Grand_Canyon_University	0		Illinois_State	0		Institute_of_Pharmacology_Moscow_Russia	0		Istanbul_Technical_University	0		Indiana_University_of_Pennsylvania	0		Hengyang_Medical_College	0		Institute_of_Child_Psychology_at_the_University_of_Minnesota	0		INRIA-Sophia_Antipolis	0		Indian_Institute_Of_Chemical_Technology	0		Institute_of_Chemical_Technology_Mumbai	0		Inner_Mongolia_Medical_University	0		Institute_of_Cytology_and_Genetics_Novosibirsk_Russia	0		Jackson_State	0
International_Institute_for_Population_Sciences_Bombay_India	0		Illinois_School_of_Professional_Psychology	0		Institute_of_Chemical_Technology_Prague	0		Industrial_Toxicology_Research_Center	0		Grant_Medical_College_and_Sir_JJ_Group_of_Hospitals	0		Illinois_Tech	0		Institute_of_Pharmacy_&_Biochemistry_Prague_Czech	0		Istanbul_University	0		Indiana_Wesleyan_University	0		Henry_Poincare_University	0		Institute_of_Cytology_and_Genetics_Novosibirsk_Russia	0		Instit_De_Medicina_Si_Farmacie	0		Indian_Institute_of_Science	0		Institute_of_Chemical_Technology_Prague	0		Inner_Mongolia_University	0		Institute_of_Experimental_Botany_Minsk	0		Jadavpur_University	0
International_School_For_Advanced_Studies	0		Illinois_State	0		Institute_of_Child_Psychology_at_the_University_of_Minnesota	0		Inner_Mongolia_Medical_University	0		Graz_University_of_Technology	0		Ilorin_University	0		Institute_of_Physics_Bucharest	0		Italian_Institute_of_Technology	0		Industrial_Toxicology_Research_Center	0		Heriot-Watt_University	0		Institute_of_Experimental_Botany_Minsk	0		Institut_National_de_la_Recherche_Agronomique	0		Indian_Institute_of_Technology_Bombay	0		Institute_of_Child_Psychology_at_the_University_of_Minnesota	0		INRIA-Sophia_Antipolis	0		Institute_of_Experimental_Medicine_St_Petersburg_Russia	0		Jagiellonian_University	0
Ioffe_Institute_of_Physics_and_Technology_Leningrad	0		Illinois_Tech	0		Institute_of_Cytology_and_Genetics_Novosibirsk_Russia	0		Inner_Mongolia_University	0		Grenoble_Institute_of_Technology	0		IMMACULATA_UNIVERSITY	0		Institute_of_Physiology	0		Italy_University	0		Inner_Mongolia_Medical_University	0		Higher_Institute_of_Medical_Sciences	0		Institute_of_Experimental_Medicine_St_Petersburg_Russia	0		Institut_National_des_Sciences	0		Indian_Institute_of_Technology_Delhi	0		Institute_of_Cytology_and_Genetics_Novosibirsk_Russia	0		Instit_De_Medicina_Si_Farmacie	0		Institute_of_Genetics_and_Animal_Breeding	0		James_Cook_University	0
Iowa_State	0		Ilorin_University	0		Institute_of_Experimental_Botany_Minsk	0		INRIA-Sophia_Antipolis	0		Guangxi_Medical_University	0		Imperial_Cancer_Research_Fund	0		Institute_of_Toxicology_St_Petersburg	0		Ithaca_College	0		Inner_Mongolia_University	0		Highland_University	0		Institute_of_Genetics_and_Animal_Breeding	0		Institut_National_Polytechnique_de_Lorraine	0		Indian_Institute_of_Technology_Kanpur	0		Institute_of_Experimental_Botany_Minsk	0		Institut_National_de_la_Recherche_Agronomique	0		Institute_of_Genetics_and_Selection_of_Industrial_Microorganisms	0		James_Madison_University	0
IP_Pavlov_Leningrad_Medical_University	0		IMMACULATA_UNIVERSITY	0		Institute_of_Experimental_Medicine_St_Petersburg_Russia	0		Instit_De_Medicina_Si_Farmacie	0		Guangzhou_Medical_University	0		Imperial_College_London	0		Institute_of_Tuberculosis	0		Iuliu_Hatieganu_University_of_Medicine_and_Pharmacy	0		INRIA-Sophia_Antipolis	0		Hiroshima_University	0		Institute_of_Genetics_and_Selection_of_Industrial_Microorganisms	0		Institut_National_Polytechnique_Toulouse	0		Indian_Institute_of_Technology_Roorkee	0		Institute_of_Experimental_Medicine_St_Petersburg_Russia	0		Institut_National_des_Sciences	0		Institute_Of_Genetics_Beijing	0		Jamia_Hamdard_University	0
Islamic_Azad_University	0		IMTECH	0		Institute_of_Genetics_and_Animal_Breeding	0		Institut_National_de_la_Recherche_Agronomique	0		Guangzhou_University_of_Chinese_Medicine	0		IMTECH	0		Institute_of_Virology	0		IUPUI	0		Instit_De_Medicina_Si_Farmacie	0		Hirszfeld_Institute_and_Basel_Institute_for_Immunology	0		Institute_Of_Genetics_Beijing	0		Institute_for_Continuing_Education_of_Physicians_Russia	0		Indian_Institute_of_Toxicology_Research	0		Institute_of_Genetics_and_Animal_Breeding	0		Institut_National_Polytechnique_de_Lorraine	0		Institute_of_Higher_Education_University_of_Georgia_Athens_Georgia	0		Jamia_Millia_Islamia_University	0
Istanbul_Technical_University	0		India-Nagpur_University	0		Institute_of_Genetics_and_Selection_of_Industrial_Microorganisms	0		Institut_National_des_Sciences	0		Gujarat_University	0		India-Nagpur_University	0		Institute_of_Virology_Chinese_Academy_of_Preventive_Medicine	0		Ivanovsky_Institute_of_Virology_Moscow	0		Institut_National_de_la_Recherche_Agronomique	0		Hofstra	0		Institute_of_Higher_Education_University_of_Georgia_Athens_Georgia	0		Institute_for_Genetics_and_Microorganisms	0		Indian_Statistical_Institute_Bengaluru	0		Institute_of_Genetics_and_Selection_of_Industrial_Microorganisms	0		Institut_National_Polytechnique_Toulouse	0		Institute_of_Macromolecular_Chemistry_Prague	0		Jawaharlal_Institute_of_Post-Graduate_Medical_Education_And_Research	0
Istanbul_University	0		Indian_Agricultural_Research_Institute	0		Institute_Of_Genetics_Beijing	0		Institut_National_Polytechnique_de_Lorraine	0		Gulhane_Military_Medical_School	0		Indian_Agricultural_Research_Institute	0		Institute_of_Virology_Glasgow	0		Iwate_University_Japan	0		Institut_National_des_Sciences	0		Hokkaido_University	0		Institute_of_Macromolecular_Chemistry_Prague	0		Institute_for_Genetics_and_Selection_of_Industrial_Microorganisms_Russia	0		Indian_Veterinary_Research_Institute_Izatnagar_India	0		Institute_Of_Genetics_Beijing	0		Institute_for_Continuing_Education_of_Physicians_Russia	0		Institute_of_Mathematics_Swiss_Federal_Institute_of_Technology	0		Jawaharlal_Nehru_Center_for_Advanced_Scientific_Research	0
Italian_Institute_of_Technology	0		Indian_Association_for_the_Cultivation_of_Science	0		Institute_of_Higher_Education_University_of_Georgia_Athens_Georgia	0		Institut_National_Polytechnique_Toulouse	0		Guntur_Medical_College	0		Indian_Association_for_the_Cultivation_of_Science	0		Institute_Theoretical_and_Experimental_Biophysics	0		Jackson_State	0		Institut_National_Polytechnique_de_Lorraine	0		Hong_Kong_Baptist_University	0		Institute_of_Mathematics_Swiss_Federal_Institute_of_Technology	0		Institute_for_Pharmazeutishe_Biologie	0		Indiana_State	0		Institute_of_Higher_Education_University_of_Georgia_Athens_Georgia	0		Institute_for_Genetics_and_Microorganisms	0		Institute_of_Medical_Sciences_Banaras_Hindu_University	0		Jawaharlal_Nehru_Medical_College	0
Italy_University	0		Indian_Institute_of_Chemical_Biology	0		Institute_of_Macromolecular_Chemistry_Prague	0		Institute_for_Continuing_Education_of_Physicians_Russia	0		Gyeongsang_National_University	0		Indian_Institute_of_Chemical_Biology	0		Institution_of_Medical_Genetics_Moscow	0		Jadavpur_University	0		Institut_National_Polytechnique_Toulouse	0		Hong_Kong_University_of_Science_and_Technology	0		Institute_of_Medical_Sciences_Banaras_Hindu_University	0		Institute_for_Research_in_Fundamental_Sciences_Tehran_Iran	0		Indiana_University_of_Pennsylvania	0		Institute_of_Macromolecular_Chemistry_Prague	0		Institute_for_Genetics_and_Selection_of_Industrial_Microorganisms_Russia	0		Institute_of_Medical_Sciences_Lucknow_India	0		Jawaharlal_Nehru_University	0
Ithaca_College	0		Indian_Institute_Of_Chemical_Technology	0		Institute_of_Mathematics_Swiss_Federal_Institute_of_Technology	0		Institute_for_Genetics_and_Microorganisms	0		Hacettepe_University	0		Indian_Institute_Of_Chemical_Technology	0		Instituto_Leloir	0		Jagiellonian_University	0		Institute_for_Continuing_Education_of_Physicians_Russia	0		Hoshi_University	0		Institute_of_Medical_Sciences_Lucknow_India	0		Institute_of_Agroecology_and_Biotechnology	0		Indiana_Wesleyan_University	0		Institute_of_Mathematics_Swiss_Federal_Institute_of_Technology	0		Institute_for_Pharmazeutishe_Biologie	0		Institute_of_Medical_Sciences_Varanasi	0		Jeju_National_University	0
Iuliu_Hatieganu_University_of_Medicine_and_Pharmacy	0		Indian_Institute_of_Science	0		Institute_of_Medical_Sciences_Banaras_Hindu_University	0		Institute_for_Genetics_and_Selection_of_Industrial_Microorganisms_Russia	0		Hadassah_Medical_School	0		Indian_Institute_of_Science	0		Instituto_Politécnico_Nacional	0		James_Cook_University	0		Institute_for_Genetics_and_Microorganisms	0		Howard	0		Institute_of_Medical_Sciences_Varanasi	0		Institute_of_Atomic_Physics	0		Industrial_Toxicology_Research_Center	0		Institute_of_Medical_Sciences_Banaras_Hindu_University	0		Institute_for_Research_in_Fundamental_Sciences_Tehran_Iran	0		Institute_of_Medicine_and_Pharmacy_Bucharest	0		Jeonbuk_National_University	0
IUPUI	0		Indian_Institute_of_Technology_Bombay	0		Institute_of_Medical_Sciences_Lucknow_India	0		Institute_for_Pharmazeutishe_Biologie	0		Hahnemann_Medical_College_Philadelphia	0		Indian_Institute_of_Technology_Bombay	0		Instituto_Tecnologico_De_Santo_Domingo	0		James_Madison_University	0		Institute_for_Genetics_and_Selection_of_Industrial_Microorganisms_Russia	0		Huazhong_Agricultural_University	0		Institute_of_Medicine_and_Pharmacy_Bucharest	0		Institute_of_Biochemistry	0		Inner_Mongolia_Medical_University	0		Institute_of_Medical_Sciences_Lucknow_India	0		Institute_of_Agroecology_and_Biotechnology	0		Institute_of_Microbial_Technology_Chandigarh_India	0		Jiangnan_University	0
Ivanovsky_Institute_of_Virology_Moscow	0		Indian_Institute_of_Technology_Delhi	0		Institute_of_Medicine_and_Pharmacy_Bucharest	0		Institute_for_Research_in_Fundamental_Sciences_Tehran_Iran	0		Hallym_University	0		Indian_Institute_of_Technology_Delhi	0		Instituto_Tecnologico_y_de_Estudios_Superiores_de_Monterrey	0		Jamia_Hamdard_University	0		Institute_for_Pharmazeutishe_Biologie	0		Humboldt_University_of_Berlin	0		Institute_of_Microbial_Technology_Chandigarh_India	0		Institute_Of_Biochemistry_And_Biophysics_Polish_Academy_Of_Sciences	0		Inner_Mongolia_University	0		Institute_of_Medical_Sciences_Varanasi	0		Institute_of_Atomic_Physics	0		Institute_of_Microbiology_of_the_Czech_Academy_of_Sciences	0		Jichi_Medical_University	0
Iwate_University_Japan	0		Indian_Institute_of_Technology_Kanpur	0		Institute_of_Microbial_Technology_Chandigarh_India	0		Institute_of_Agroecology_and_Biotechnology	0		Hamamatsu_University	0		Indian_Institute_of_Technology_Kanpur	0		Instituto_Venezolano_de_Investigaciones_Cientificas	0		Jamia_Millia_Islamia_University	0		Institute_for_Research_in_Fundamental_Sciences_Tehran_Iran	0		Hunan_Normal_University	0		Institute_of_Microbiology_of_the_Czech_Academy_of_Sciences	0		Institute_of_Biochemistry_and_Physiology_of_Microorganisms	0		INRIA-Sophia_Antipolis	0		Institute_of_Medicine_and_Pharmacy_Bucharest	0		Institute_of_Biochemistry	0		Institute_Of_Molecular_Biology_And_Genetics_Ukraine	0		Jikeii_University_of_Medicine	0
Jackson_State	0		Indian_Institute_of_Technology_Roorkee	0		Institute_of_Microbiology_of_the_Czech_Academy_of_Sciences	0		Institute_of_Atomic_Physics	0		Hamburg_University_of_Technology	0		Indian_Institute_of_Technology_Roorkee	0		International_Centre_for_Genetic_Engineering_and_Biotechnology	0		Jawaharlal_Institute_of_Post-Graduate_Medical_Education_And_Research	0		Institute_of_Agroecology_and_Biotechnology	0		Hunan_University	0		Institute_Of_Molecular_Biology_And_Genetics_Ukraine	0		Institute_of_Biomedical_Problems_Moscow	0		Instit_De_Medicina_Si_Farmacie	0		Institute_of_Microbial_Technology_Chandigarh_India	0		Institute_Of_Biochemistry_And_Biophysics_Polish_Academy_Of_Sciences	0		Institute_of_Molecular_Genetics_Moscow	0		Jilin_University	0
Jadavpur_University	0		Indian_Institute_of_Toxicology_Research	0		Institute_Of_Molecular_Biology_And_Genetics_Ukraine	0		Institute_of_Biochemistry	0		Hamline_University	0		Indian_Institute_of_Toxicology_Research	0		International_Institute_for_Population_Sciences_Bombay_India	0		Jawaharlal_Nehru_Center_for_Advanced_Scientific_Research	0		Institute_of_Atomic_Physics	0		Huntsman_Cancer_Institute	0		Institute_of_Molecular_Genetics_Moscow	0		Institute_of_Bioorganic_Chemistry	0		Institut_National_de_la_Recherche_Agronomique	0		Institute_of_Microbiology_of_the_Czech_Academy_of_Sciences	0		Institute_of_Biochemistry_and_Physiology_of_Microorganisms	0		Institute_of_Mother_and_Child_Warsaw	0		Jinan_University	0
Jagiellonian_University	0		Indian_Statistical_Institute_Bengaluru	0		Institute_of_Molecular_Genetics_Moscow	0		Institute_Of_Biochemistry_And_Biophysics_Polish_Academy_Of_Sciences	0		Hampton	0		Indian_Statistical_Institute_Bengaluru	0		International_School_For_Advanced_Studies	0		Jawaharlal_Nehru_Medical_College	0		Institute_of_Biochemistry	0		Hyogo_College_of_Medicine	0		Institute_of_Mother_and_Child_Warsaw	0		Institute_of_Biotechnology	0		Institut_National_des_Sciences	0		Institute_Of_Molecular_Biology_And_Genetics_Ukraine	0		Institute_of_Biological_Physics_Pushchino	0		Institute_of_Normal_Physiology_Moscow	0		Jiwaji_University	0
James_Cook_University	0		Indian_Veterinary_Research_Institute_Izatnagar_India	0		Institute_of_Mother_and_Child_Warsaw	0		Institute_of_Biochemistry_and_Physiology_of_Microorganisms	0		Hannover_Medical_School_Hannover	0		Indian_Veterinary_Research_Institute_Izatnagar_India	0		Ioffe_Institute_of_Physics_and_Technology_Leningrad	0		Jeju_National_University	0		Institute_Of_Biochemistry_And_Biophysics_Polish_Academy_Of_Sciences	0		Ibero-American_University_Puebla	0		Institute_of_Normal_Physiology_Moscow	0		Institute_of_Cancer_Research_London	0		Institut_National_Polytechnique_de_Lorraine	0		Institute_of_Molecular_Genetics_Moscow	0		Institute_of_Biomedical_Problems_Moscow	0		Institute_of_Nuclear_Physics_Calcutta_India	0		Johannes_Gutenberg_University_of_Mainz	0
James_Madison_University	0		Indiana_State	0		Institute_of_Normal_Physiology_Moscow	0		Institute_of_Biomedical_Problems_Moscow	0		Hanover_College	0		Indiana_State	0		IP_Pavlov_Leningrad_Medical_University	0		Jeonbuk_National_University	0		Institute_of_Biochemistry_and_Physiology_of_Microorganisms	0		Idaho_State	0		Institute_of_Nuclear_Physics_Calcutta_India	0		Institute_of_Cell_Biophysics	0		Institut_National_Polytechnique_Toulouse	0		Institute_of_Mother_and_Child_Warsaw	0		Institute_of_Bioorganic_Chemistry	0		Institute_Of_Pharmaceutical_Chemistry	0		John_Curtin_School_of_Medical_Research	0
Jamia_Hamdard_University	0		Indiana_University_of_Pennsylvania	0		Institute_of_Nuclear_Physics_Calcutta_India	0		Institute_of_Bioorganic_Chemistry	0		Hanover_University_Germany	0		Indiana_University_of_Pennsylvania	0		Islamic_Azad_University	0		Jiangnan_University	0		Institute_of_Biological_Physics_Pushchino	0		Illinois_Medical_Center	0		Institute_Of_Pharmaceutical_Chemistry	0		Institute_of_Chemical_Kinetics_and_Combustion	0		Institute_for_Continuing_Education_of_Physicians_Russia	0		Institute_of_Normal_Physiology_Moscow	0		Institute_of_Biotechnology	0		Institute_of_Pharmacology_Moscow_Russia	0		John_Jay_College_of_Criminal_Justice_(CUNY)	0
Jamia_Millia_Islamia_University	0		Indiana_Wesleyan_University	0		Institute_Of_Pharmaceutical_Chemistry	0		Institute_of_Biotechnology	0		Hanyang_University	0		Indiana_Wesleyan_University	0		Istanbul_Technical_University	0		Jichi_Medical_University	0		Institute_of_Biomedical_Problems_Moscow	0		Illinois_School_of_Professional_Psychology	0		Institute_of_Pharmacology_Moscow_Russia	0		Institute_of_Chemical_Technology_Mumbai	0		Institute_for_Genetics_and_Microorganisms	0		Institute_of_Nuclear_Physics_Calcutta_India	0		Institute_of_Cancer_Research_London	0		Institute_of_Pharmacy_&_Biochemistry_Prague_Czech	0		Johnson_&_Wales_University-Providence	0
Jawaharlal_Institute_of_Post-Graduate_Medical_Education_And_Research	0		Industrial_Toxicology_Research_Center	0		Institute_of_Pharmacology_Moscow_Russia	0		Institute_of_Cancer_Research_London	0		Harbin_Institute_of_Technology	0		Industrial_Toxicology_Research_Center	0		Istanbul_University	0		Jikeii_University_of_Medicine	0		Institute_of_Bioorganic_Chemistry	0		Illinois_State	0		Institute_of_Pharmacy_&_Biochemistry_Prague_Czech	0		Institute_of_Chemical_Technology_Prague	0		Institute_for_Genetics_and_Selection_of_Industrial_Microorganisms_Russia	0		Institute_Of_Pharmaceutical_Chemistry	0		Institute_of_Cell_Biophysics	0		Institute_of_Physics_Bucharest	0		Jordan_University_of_Science_And_Technology	0
Jawaharlal_Nehru_Center_for_Advanced_Scientific_Research	0		Inner_Mongolia_Medical_University	0		Institute_of_Pharmacy_&_Biochemistry_Prague_Czech	0		Institute_of_Cell_Biophysics	0		Hardin-Simmons_University	0		Inner_Mongolia_Medical_University	0		Italian_Institute_of_Technology	0		Jilin_University	0		Institute_of_Biotechnology	0		Illinois_Tech	0		Institute_of_Physics_Bucharest	0		Institute_of_Child_Psychology_at_the_University_of_Minnesota	0		Institute_for_Pharmazeutishe_Biologie	0		Institute_of_Pharmacology_Moscow_Russia	0		Institute_of_Chemical_Kinetics_and_Combustion	0		Institute_of_Physiology	0		Joseph_Fourier_University	0
Jawaharlal_Nehru_Medical_College	0		Inner_Mongolia_University	0		Institute_of_Physics_Bucharest	0		Institute_of_Chemical_Kinetics_and_Combustion	0		Harokopio_University	0		Inner_Mongolia_University	0		Italy_University	0		Jinan_University	0		Institute_of_Cancer_Research_London	0		Ilorin_University	0		Institute_of_Physiology	0		Institute_of_Cytology_and_Genetics_Novosibirsk_Russia	0		Institute_for_Research_in_Fundamental_Sciences_Tehran_Iran	0		Institute_of_Pharmacy_&_Biochemistry_Prague_Czech	0		Institute_of_Chemical_Technology_Mumbai	0		Institute_of_Toxicology_St_Petersburg	0		Jozsef_Attila_University	0
Jawaharlal_Nehru_University	0		INRIA-Sophia_Antipolis	0		Institute_of_Physiology	0		Institute_of_Chemical_Technology_Mumbai	0		Harrison_College	0		INRIA-Sophia_Antipolis	0		Ithaca_College	0		Jiwaji_University	0		Institute_of_Cell_Biophysics	0		IMMACULATA_UNIVERSITY	0		Institute_of_Toxicology_St_Petersburg	0		Institute_of_Experimental_Botany_Minsk	0		Institute_of_Agroecology_and_Biotechnology	0		Institute_of_Physics_Bucharest	0		Institute_of_Chemical_Technology_Prague	0		Institute_of_Tuberculosis	0		Juntendo_University	0
Jeju_National_University	0		Instit_De_Medicina_Si_Farmacie	0		Institute_of_Toxicology_St_Petersburg	0		Institute_of_Chemical_Technology_Prague	0		Haryana_Agricultural_University	0		Instit_De_Medicina_Si_Farmacie	0		Iuliu_Hatieganu_University_of_Medicine_and_Pharmacy	0		Johannes_Gutenberg_University_of_Mainz	0		Institute_of_Chemical_Kinetics_and_Combustion	0		Imperial_Cancer_Research_Fund	0		Institute_of_Tuberculosis	0		Institute_of_Experimental_Medicine_St_Petersburg_Russia	0		Institute_of_Atomic_Physics	0		Institute_of_Physiology	0		Institute_of_Child_Psychology_at_the_University_of_Minnesota	0		Institute_of_Virology	0		Kabul_Medical_University	0
Jeonbuk_National_University	0		Institut_National_de_la_Recherche_Agronomique	0		Institute_of_Tuberculosis	0		Institute_of_Cytology_and_Genetics_Novosibirsk_Russia	0		Havana_Advanced_Institute_Of_Medical_Sciences	0		Institut_National_de_la_Recherche_Agronomique	0		IUPUI	0		John_Curtin_School_of_Medical_Research	0		Institute_of_Chemical_Technology_Mumbai	0		Imperial_College_London	0		Institute_of_Virology	0		Institute_of_Genetics_and_Animal_Breeding	0		Institute_of_Biochemistry	0		Institute_of_Toxicology_St_Petersburg	0		Institute_of_Cytology_and_Genetics_Novosibirsk_Russia	0		Institute_of_Virology_Chinese_Academy_of_Preventive_Medicine	0		Kagawa_University	0
Jiangnan_University	0		Institut_National_des_Sciences	0		Institute_of_Virology	0		Institute_of_Experimental_Botany_Minsk	0		Haverford_College	0		Institut_National_des_Sciences	0		Ivanovsky_Institute_of_Virology_Moscow	0		John_Jay_College_of_Criminal_Justice_(CUNY)	0		Institute_of_Chemical_Technology_Prague	0		IMTECH	0		Institute_of_Virology_Chinese_Academy_of_Preventive_Medicine	0		Institute_of_Genetics_and_Selection_of_Industrial_Microorganisms	0		Institute_Of_Biochemistry_And_Biophysics_Polish_Academy_Of_Sciences	0		Institute_of_Tuberculosis	0		Institute_of_Experimental_Botany_Minsk	0		Institute_of_Virology_Glasgow	0		Kagoshima_University	0
Jichi_Medical_University	0		Institut_National_Polytechnique_de_Lorraine	0		Institute_of_Virology_Chinese_Academy_of_Preventive_Medicine	0		Institute_of_Experimental_Medicine_St_Petersburg_Russia	0		Hawler_Medical_University	0		Institut_National_Polytechnique_de_Lorraine	0		Iwate_University_Japan	0		Johnson_&_Wales_University-Providence	0		Institute_of_Cytology_and_Genetics_Novosibirsk_Russia	0		India-Nagpur_University	0		Institute_of_Virology_Glasgow	0		Institute_Of_Genetics_Beijing	0		Institute_of_Biochemistry_and_Physiology_of_Microorganisms	0		Institute_of_Virology	0		Institute_of_Experimental_Medicine_St_Petersburg_Russia	0		Institute_Theoretical_and_Experimental_Biophysics	0		Kakatiya_Medical_College	0
Jikeii_University_of_Medicine	0		Institut_National_Polytechnique_Toulouse	0		Institute_of_Virology_Glasgow	0		Institute_of_Genetics_and_Animal_Breeding	0		Health_Policy_Institute	0		Institut_National_Polytechnique_Toulouse	0		Jackson_State	0		Jordan_University_of_Science_And_Technology	0		Institute_of_Experimental_Botany_Minsk	0		Indian_Agricultural_Research_Institute	0		Institute_Theoretical_and_Experimental_Biophysics	0		Institute_of_Higher_Education_University_of_Georgia_Athens_Georgia	0		Institute_of_Biological_Physics_Pushchino	0		Institute_of_Virology_Chinese_Academy_of_Preventive_Medicine	0		Institute_of_Genetics_and_Animal_Breeding	0		Institution_of_Medical_Genetics_Moscow	0		Kanazawa_University	0
Jilin_University	0		Institute_for_Continuing_Education_of_Physicians_Russia	0		Institute_Theoretical_and_Experimental_Biophysics	0		Institute_of_Genetics_and_Selection_of_Industrial_Microorganisms	0		Heat_and_Transfer_Institute	0		Institute_for_Continuing_Education_of_Physicians_Russia	0		Jadavpur_University	0		Joseph_Fourier_University	0		Institute_of_Experimental_Medicine_St_Petersburg_Russia	0		Indian_Association_for_the_Cultivation_of_Science	0		Institution_of_Medical_Genetics_Moscow	0		Institute_of_Macromolecular_Chemistry_Prague	0		Institute_of_Biomedical_Problems_Moscow	0		Institute_of_Virology_Glasgow	0		Institute_of_Genetics_and_Selection_of_Industrial_Microorganisms	0		Instituto_Politécnico_Nacional	0		Kanpur_University	0
Jinan_University	0		Institute_for_Genetics_and_Microorganisms	0		Institution_of_Medical_Genetics_Moscow	0		Institute_Of_Genetics_Beijing	0		Heidelberg_University	0		Institute_for_Genetics_and_Microorganisms	0		Jagiellonian_University	0		Jozsef_Attila_University	0		Institute_of_Genetics_and_Animal_Breeding	0		Indian_Institute_of_Chemical_Biology	0		Instituto_Leloir	0		Institute_of_Mathematics_Swiss_Federal_Institute_of_Technology	0		Institute_of_Bioorganic_Chemistry	0		Institute_Theoretical_and_Experimental_Biophysics	0		Institute_Of_Genetics_Beijing	0		Instituto_Tecnologico_De_Santo_Domingo	0		Kansas_City_College_of_Osteopathic_Medicine	0
Jiwaji_University	0		Institute_for_Genetics_and_Selection_of_Industrial_Microorganisms_Russia	0		Instituto_Leloir	0		Institute_of_Higher_Education_University_of_Georgia_Athens_Georgia	0		Heinrich-Heine_University	0		Institute_for_Genetics_and_Selection_of_Industrial_Microorganisms_Russia	0		James_Cook_University	0		Juntendo_University	0		Institute_Of_Genetics_Beijing	0		Indian_Institute_Of_Chemical_Technology	0		Instituto_Politécnico_Nacional	0		Institute_of_Medical_Sciences_Banaras_Hindu_University	0		Institute_of_Biotechnology	0		Institution_of_Medical_Genetics_Moscow	0		Institute_of_Higher_Education_University_of_Georgia_Athens_Georgia	0		Instituto_Tecnologico_y_de_Estudios_Superiores_de_Monterrey	0		Kansas_City_University_of_Medicine_and_Biosciences	0
Johannes_Gutenberg_University_of_Mainz	0		Institute_for_Pharmazeutishe_Biologie	0		Instituto_Politécnico_Nacional	0		Institute_of_Macromolecular_Chemistry_Prague	0		Hellenic_Pasteur_Institute	0		Institute_for_Pharmazeutishe_Biologie	0		James_Madison_University	0		Kabul_Medical_University	0		Institute_of_Higher_Education_University_of_Georgia_Athens_Georgia	0		Indian_Institute_of_Technology	0		Instituto_Tecnologico_De_Santo_Domingo	0		Institute_of_Medical_Sciences_Lucknow_India	0		Institute_of_Cancer_Research_London	0		Instituto_Leloir	0		Institute_of_Macromolecular_Chemistry_Prague	0		Instituto_Venezolano_de_Investigaciones_Cientificas	0		Kansas_State	0
[truncated: 1,524 more rows]
