# Supplementary material for: Analysis of NIH K99/R00 Awards and the Career Progression of Awardees
Source: bioRxiv preprint, doi:10.1101/2023.01.26.525751, version 16 (2023-12-29)
Supplement: Supplemental File 1 [file 525751_file12.csv]

Administering IC	Application ID	Award Notice Date	FOA	Project Number	Type	Activity	IC	Serial Number	Support Year	Suffix	Program Official Information	Project Start Date	Project End Date	Study Section	Contact PI Person ID	Congressional District	Department	Primary DUNS	Primary UEI	DUNS Number	UEI	FIPS	Latitude	Longitude	Organization ID (IPF)	Organization Name	Organization_FacNum	K99_code	ga_gender	ga_accuracy	Organization City	Organization State	Organization Type	Organization Zip	Organization Country	ARRA Indicator	Budget Start Date	Budget End Date	CFDA Code	Funding Mechanism	Fiscal Year	Total Cost	Funding IC(s)	Total Cost IC	coastal or not
NIAID	7224589	39051	PA-06-133	1K99AI072973-01	1	K99	AI	72973	1		EMBRY, ALAN C	39052	39416	Acquired Immunodeficiency Syndrome Research Study Section[AIDS]	8592666	7	Unavailable	73130411	FLJ7DQKLL226	73130411	FLJ7DQKLL226	US	42.363198	-71.068772	4907701	MASSACHUSETTS GENERAL HOSP		Elite	female	97	BOSTON	MA	Independent Hospitals	21142621	UNITED STATES	N	39052	39416	855	Other Research-Related	2007	90000	NIAID	90000	#N/A
NIAID	7222507	39051	PA-06-133	1K99AI072834-01	1	K99	AI	72834	1		PETERS, KENT	39234	39599	ZAI1-AWA-M(S1)	8627985	7	BIOCHEMISTRY	47006379	JDLVAVGYJQ21	47006379	JDLVAVGYJQ21	US	42.335672	-71.104237	3212902	HARVARD MED SCH		Elite	female	99	BOSTON	MA	SCHOOLS OF MEDICINE	21201616	UNITED STATES	N	39234	39599	855	Other Research-Related	2007	77663	NIAID	77663	#N/A
NHLBI	7251039	39051	PA-06-133	1K99HL088514-01	1	K99	HL	88514	1		COMMARATO, MICHAEL	39052	39782	ZHL1-CSR-M(F1)	8608228	8	Unavailable	71723621	C1CPANL3EWK4	71723621	C1CPANL3EWK4	US	42.33982	-71.10568	758101	BETH ISRAEL DEACONESS MED CTR		Elite	female	97	BOSTON	MA	Independent Hospitals	22155400	UNITED STATES	N	39052	39416	837	Other Research-Related	2007	88020	NHLBI	88020	coastal
NICHD	7222593	39051	PA-06-133	1K99HD055034-01	1	K99	HD	55034	1		HENKEN, DEBORAH B	39052	39355	Developmental Biology Study Section[CHHD-C]	8628188	29	NONE	9584210	U2JMKHNS5TG4	9584210	U2JMKHNS5TG4	US	34.134332	-118.12652	1073501	CALIFORNIA INST OF TECHNOLOGY		Elite	female	98	PASADENA	CA	SCHOOLS OF ARTS AND SCIENCES	911250001	UNITED STATES	N	39052	39355	865	Other Research-Related	2007	89370	NICHD	89370	coastal
NIDDK	7223685	39052	PA-06-133	1K99DK077445-01	1	K99	DK	77445	1		SATO, SHERYL M	39052	39782	Diabetes, Endocrinology and Metabolic Diseases B Study Section[DDK-B]	8751919	5	MICROBIOLOGY/IMMUN/VIROLOGY	82359691	LN53LCFJFL45	82359691	LN53LCFJFL45	US	42.369697	-71.11193	3212901	HARVARD U		Elite	female	51	CAMBRIDGE	MA	SCHOOLS OF ARTS AND SCIENCES	21385369	UNITED STATES	N	39052	39416	847	Other Research-Related	2007	81897	NIDDK	81897	coastal
NIAID	7245991	39169	PA-06-133	1K99AI073682-01	1	K99	AI	73682	1		PROGRAIS, LAWRENCE J	39173	39447	Allergy, Immunology, and Transplantation Research Committee[AITC]	8651182	18	PATHOLOGY	9214214	HJD6G4D6TJY5	9214214	HJD6G4D6TJY5	US	37.426852	-122.17047	8046501	STANFORD U		Elite	female	97	STANFORD	CA	SCHOOLS OF MEDICINE	943052004	UNITED STATES	N	39173	39447	855	Other Research-Related	2007	85536	NIAID	85536	coastal
NIDCR	7317323	39260	PA-06-133	1K99DE018212-01A1	1	K99	DE	18212	1	A	DRUMMOND, JAMES	39264	39629	NIDCR Special Grants Review Committee[DSR]	7357821	12	DENTISTRY	94878337	KMH5K9V7S518	94878337	KMH5K9V7S518	US	37.767442	-122.413937	577508	U OF CALIFORNIA SAN FRANCISCO		Elite	female	98	SAN FRANCISCO	CA	SCHOOLS OF DENTISTRY/ORAL HYGN	941432510	UNITED STATES	N	39264	39629	121	Other Research-Related	2007	90000	NIDCR	90000	coastal
NIAID	7302956	39266	PA-06-133	1K99AI075106-01	1	K99	AI	75106	1		JACOBS, GAIL G	39278	39478	Microbiology and Infectious Diseases B Research Study Section[MID-B]	8802018	21	Unavailable	20658969	N6K7XKLGRJ61	20658969	N6K7XKLGRJ61	US	44.317733	-74.159459	8409401	TRUDEAU INST INC		Non_Elite	female	100	SARANAC LAKE	NY	Research Institutes	129832100	UNITED STATES	N	39278	39478	855	Other Research-Related	2007	90000	NIAID	90000	coastal
NIGMS	7297253	39276	PA-06-133	1K99GM081355-01	1	K99	GM	81355	1		CARTER, ANTHONY D	39278	39629	ZGM1-BRT-9(KR)	1857586	12	PHARMACOLOGY	94878337	KMH5K9V7S518	94878337	KMH5K9V7S518	US	37.767442	-122.413937	577508	U OF CALIFORNIA SAN FRANCISCO		Elite	female	98	SAN FRANCISCO	CA	SCHOOLS OF MEDICINE	941432510	UNITED STATES	N	39278	39629	859	Other Research-Related	2007	86400	NIGMS	86400	coastal
NCI	7301141	39276	PA-06-133	1K99CA129070-01	1	K99	CA	129070	1		SCHMIDT, MICHAEL K	39276	39994	ZCA1-RTRB-A(M1)	8683425	7	Unavailable	73130411	FLJ7DQKLL226	73130411	FLJ7DQKLL226	US	42.363198	-71.068772	4907701	MASSACHUSETTS GENERAL HOSP		Elite	female	93	BOSTON	MA	Independent Hospitals	21142621	UNITED STATES	N	39276	39629	398	Other Research-Related	2007	140940	NCI	140940	coastal
NCRR	7318650	39291	PA-06-133	1K99RR024105-01A1	1	K99	RR	24105	1	A	SHEELEY, DOUGLAS	39295	39677	ZGM1-BRT-9(KR)	8623913	10	NONE	4315578	NMJHD63STRC5	4315578	NMJHD63STRC5	US	33.931173	-83.378873	676602	U OF GEORGIA		Non_Elite	female	99	ATHENS	GA	ORGANIZED RESEARCH UNITS	306021589	UNITED STATES	N	39295	39677	389	Other Research-Related	2007	89640	NCRR	89640	#N/A
NIAAA	7249908	39295	PA-06-133	1K99AA017376-01	1	K99	AA	17376	1		GAO, PETER	39295	40025	Digestive Diseases and Nutrition C Study Section[DDK-C]	2196764	4	INTERNAL MEDICINE/MEDICINE	44387793	TP7EK8DZV6N5	44387793	TP7EK8DZV6N5	US	36.007766	-78.926475	2221101	DUKE U		Elite	female	97	DURHAM	NC	SCHOOLS OF MEDICINE	277054673	UNITED STATES	N	39295	39660	273	Other Research-Related	2007	79497	NIAAA	79497	coastal
NIA	7320323	39300	PA-06-133	1K99AG029710-01A1	1	K99	AG	29710	1	A	MONJAN, ANDREW A	39309	40025	Basic Neuroscience of Aging Study Section[NIA-N]	7012477	13	PSYCHOLOGY	124726725	GS3YEVSS12N6	124726725	GS3YEVSS12N6	US	37.870017	-122.268624	577502	U OF CALIFORNIA BERKELEY		Elite	female	99	BERKELEY	CA	SCHOOLS OF ARTS AND SCIENCES	947101749	UNITED STATES	N	39309	39660	866	Other Research-Related	2007	77789	NIA	77789	#N/A
NIGMS	7299796	39307	PA-06-133	1K99GM081399-01	1	K99	GM	81399	1		CARTER, ANTHONY D	39307	39660	ZGM1-BRT-9(KR)	8781331	13	BIOCHEMISTRY	124726725	GS3YEVSS12N6	124726725	GS3YEVSS12N6	US	37.870017	-122.268624	577502	U OF CALIFORNIA BERKELEY		Elite	female	96	BERKELEY	CA	SCHOOLS OF ARTS AND SCIENCES	947101749	UNITED STATES	N	39307	39660	859	Other Research-Related	2007	90000	NIGMS	90000	coastal
NHGRI	7300839	39316	PA-06-133	1K99HG004316-01	1	K99	HG	4316	1		LOCKHART, NICOLE C	39326	39629	Genome Research Study Section[GNOM-G]	1862289	18	GENETICS	9214214	HJD6G4D6TJY5	9214214	HJD6G4D6TJY5	US	37.426852	-122.17047	8046501	STANFORD U		Elite	female	96	STANFORD	CA	SCHOOLS OF MEDICINE	943052004	UNITED STATES	N	39326	39629	172	Other Research-Related	2007	85316	NHGRI	85316	coastal
FIC	7321257	39344	PA-06-133	1K99TW008042-01A1	1	K99	TW	8042	1	A	SINA, BARBARA J	39355	39721	Microbiology and Infectious Diseases B Research Study Section[MID-B]	7539823	7	MICROBIOLOGY/IMMUN/VIROLOGY	5436803	KG76WYENL5K1	5436803	KG76WYENL5K1	US	42.050479	-87.680046	6144650	NORTHWESTERN U		Elite	female	93	CHICAGO	IL	SCHOOLS OF MEDICINE	606114579	UNITED STATES	N	39355	39721	989	Other Research-Related	2007	90000	FIC	90000	coastal
NIMH	7384786	39351	PA-07-297	1K99MH080100-01A1	1	K99	MH	80100	1	A	PEARSON, JANE L	39351	40025	ZMH1-ERB-H(09)	7075400	2	PSYCHIATRY	42250712	GM1XX56LEP58	42250712	GM1XX56LEP58	US	39.953462	-75.193983	6463801	U OF PENNSYLVANIA		Elite	female	88	PHILADELPHIA	PA	SCHOOLS OF MEDICINE	191046205	UNITED STATES	N	39351	39660	281	Other Research-Related	2007	89117	NIMH	89117	coastal
NIEHS	7324847	39395	PA-06-133	5K99ES015426-02	5	K99	ES	15426	2		SHREFFLER, CAROL A	39052	39782	ZES1-LKB-C(K9)	7517447	7	PUBLIC HEALTH & PREV MEDICINE	1910777	FTMTDMBR29C7	1910777	FTMTDMBR29C7	US	39.325256	-76.605131	4134401	JOHNS HOPKINS U		Elite	female	98	BALTIMORE	MD	SCHOOLS OF PUBLIC HEALTH	212182680	UNITED STATES	N	39417	39782	113	Other Research-Related	2008	88415	NIEHS	88415	coastal
NIEHS	7324848	39395	PA-06-133	5K99ES015428-02	5	K99	ES	15428	2		SHREFFLER, CAROL A	39052	39782	ZES1-LKB-C(K9)	8207560	13	VETERINARY SCIENCES	41544081	Y8CWNJRCNN91	41544081	Y8CWNJRCNN91	US	40.116857	-88.228755	577704	U OF ILLINOIS AT URBANA CHAMPAIGN		Non_Elite	female	98	CHAMPAIGN	IL	SCHOOLS OF VETERINARY MEDICINE	618207473	UNITED STATES	N	39417	39782	113	Other Research-Related	2008	90000	NIEHS	90000	coastal
NHLBI	7323261	39407	PA-06-133	5K99HL087621-02	5	K99	HL	87621	2		CARLSON, DREW E	39052	39715	ZHL1-CSR-M(F1)	2046820	4	GENETICS	608195277	D3LHU66KBLD5	608195277	D3LHU66KBLD5	US	35.9316	-79.057377	578206	U OF NORTH CAROLINA CHAPEL HILL		Elite	female	92	CHAPEL HILL	NC	SCHOOLS OF MEDICINE	275995023	UNITED STATES	N	39417	39715	837	Other Research-Related	2008	82101	NHLBI	82101	coastal
NHLBI	7323256	39407	PA-06-133	5K99HL088514-02	5	K99	HL	88514	2		CARLSON, DREW E	39052	39599	ZHL1-CSR-M(F1)	8608228	7	Unavailable	71723621	C1CPANL3EWK4	71723621	C1CPANL3EWK4	US	42.33982	-71.10568	758101	BETH ISRAEL DEACONESS MED CTR		Elite	female	97	BOSTON	MA	Independent Hospitals	22155400	UNITED STATES	N	39417	39599	837	Other Research-Related	2008	88020	NHLBI	88020	coastal
NHLBI	7323258	39407	PA-06-133	5K99HL087927-02	5	K99	HL	87927	2		COMMARATO, MICHAEL	39052	39715	ZHL1-CSR-M(F1)	8305796	8	PHARMACOLOGY	193247145	R28EKN92ZTZ9	193247145	R28EKN92ZTZ9	US	42.653979	-84.492032	5245901	MICHIGAN STATE U		Non_Elite	female	98	EAST LANSING	MI	SCHOOLS OF OSTEOPATHIC MEDICINE	488242600	UNITED STATES	N	39417	39715	837	Other Research-Related	2008	86437	NHLBI	86437	coastal
NHLBI	7323259	39407	PA-06-133	5K99HL087591-02	5	K99	HL	87591	2		COMMARATO, MICHAEL	39052	39782	ZHL1-CSR-M(F1)	6893444	4	BIOCHEMISTRY	785979618	LT9CXX8L19G1	785979618	LT9CXX8L19G1	US	40.57951	-105.081267	1725201	COLORADO STATE U		Non_Elite	female	97	FORT COLLINS	CO	SCHOOLS OF ARTS AND SCIENCES	805232002	UNITED STATES	N	39417	39782	837	Other Research-Related	2008	81519	NHLBI	81519	coastal
NCRR	7323297	39413	PA-06-133	5K99RR024110-02	5	K99	RR	24110	2		CHANG, MICHAEL	39052	39660	ZGM1-BRT-9(KR)	2084416	13	BIOCHEMISTRY	124726725	GS3YEVSS12N6	124726725	GS3YEVSS12N6	US	37.870017	-122.268624	577502	U OF CALIFORNIA BERKELEY		Elite	female	100	BERKELEY	CA	SCHOOLS OF ARTS AND SCIENCES	947101749	UNITED STATES	N	39417	39660	389	Other Research-Related	2008	81097	NCRR	81097	coastal
NIGMS	7323251	39414	PA-06-133	5K99GM079955-02	5	K99	GM	79955	2		DEATHERAGE, JAMES F	39052	39675	ZGM1-BRT-9(KR)	8630356	12	PHARMACOLOGY	94878337	KMH5K9V7S518	94878337	KMH5K9V7S518	US	37.767442	-122.413937	577508	U OF CALIFORNIA SAN FRANCISCO		Elite	female	95	SAN FRANCISCO	CA	SCHOOLS OF MEDICINE	941432510	UNITED STATES	N	39417	39675	859	Other Research-Related	2008	65000	NIGMS	65000	#N/A
NIDDK	7324081	39414	PA-06-133	5K99DK077445-02	5	K99	DK	77445	2		SATO, SHERYL M	39052	40070	Diabetes, Endocrinology and Metabolic Diseases B Study Section[DDK-B]	8751919	5	MICROBIOLOGY/IMMUN/VIROLOGY	82359691	LN53LCFJFL45	82359691	LN53LCFJFL45	US	42.369697	-71.11193	3212901	HARVARD U		Elite	female	51	CAMBRIDGE	MA	SCHOOLS OF ARTS AND SCIENCES	21385369	UNITED STATES	N	39417	40070	847	Other Research-Related	2008	84786	NIDDK	84786	coastal
NIGMS	7356582	39416	PA-07-297	1K99GM082983-01	1	K99	GM	82983	1		OKITA, RICHARD T	39417	39599	ZGM1-BRT-9(KR)	9437283	49	Unavailable	781613492	PHZJFZ32NKH4	781613492	PHZJFZ32NKH4	US	32.903062	-117.243592	7375802	SCRIPPS RES INST THE		Non_Elite	female	96	LA JOLLA	CA	Other Domestic Non-Profits	920371000	UNITED STATES	N	39417	39599	859	Other Research-Related	2008	90000	NIGMS	90000	coastal
NINDS	7322810	39416	PA-06-133	5K99NS057934-02	5	K99	NS	57934	2		SUTHERLAND, MARGARET L	39052	39782	ZNS1-SRB-M(38)	8647357	12	PHARMACOLOGY	94878337	KMH5K9V7S518	94878337	KMH5K9V7S518	US	37.767442	-122.413937	577508	U OF CALIFORNIA SAN FRANCISCO		Elite	female	97	SAN FRANCISCO	CA	SCHOOLS OF MEDICINE	941432510	UNITED STATES	N	39417	39782	853	Other Research-Related	2008	89478	NINDS	89478	#N/A
NIAAA	7324074	39416	PA-06-133	5K99AA016731-02	5	K99	AA	16731	2		GRANDISON, LINDSEY	39052	39964	ZAA1-EE(70)	8623035	49	Unavailable	781613492	PHZJFZ32NKH4	781613492	PHZJFZ32NKH4	US	32.903062	-117.243592	7375802	SCRIPPS RES INST THE		Non_Elite	female	99	LA JOLLA	CA	Other Domestic Non-Profits	920371000	UNITED STATES	N	39417	39964	273	Other Research-Related	2008	77575	NIAAA	77575	coastal
NICHD	7324826	39416	PA-06-133	5K99HD055033-02	5	K99	HD	55033	2		HAVERKOS, LYNNE	39052	40136	ZHD1-DSR-M(HB)	8704229	7	PUBLIC HEALTH & PREV MEDICINE	98987217	W8XEAJDKMXH3	98987217	W8XEAJDKMXH3	US	41.871509	-87.667721	577703	U OF ILLINOIS AT CHICAGO		Non_Elite	female	78	Chicago	IL	SCHOOLS OF PUBLIC HEALTH	606124305	UNITED STATES	N	39417	40136	865	Other Research-Related	2008	89921	NICHD	89921	coastal
NICHD	7324839	39416	PA-06-133	5K99HD055030-02	5	K99	HD	55030	2		HUANG, TERRY T-K	39052	39782	Pediatrics Study Section[CHHD-A]	7687732	7	PSYCHIATRY	1910777	FTMTDMBR29C7	1910777	FTMTDMBR29C7	US	39.325256	-76.605131	4134401	JOHNS HOPKINS U		Elite	female	98	BALTIMORE	MD	SCHOOLS OF MEDICINE	212182680	UNITED STATES	N	39417	39782	865	Other Research-Related	2008	68426	NICHD	68426	coastal
NCRR	7323302	39430	PA-06-133	5K99RR024119-02	5	K99	RR	24119	2		CHANG, MICHAEL	39052	39709	ZGM1-BRT-9(KR)	8680208	5	PHARMACOLOGY	965717143	GTNBNWXJ12D5	965717143	DWH7MSXKA2A8; GTNBNWXJ12D5	US	36.143381	-86.803365	8721001	VANDERBILT U		Non_Elite	female	68	Nashville	TN	SCHOOLS OF MEDICINE	372032408	UNITED STATES	N	39417	39709	389	Other Research-Related	2008	83687	NCRR	83687	coastal
FIC	7502359	39430	PA-06-133	7K99TW008043-02	7	K99	TW	8043	2		JESSUP, CHRISTINE	39264	40724	Microbiology and Infectious Diseases B Research Study Section[MID-B]	8510044	5	INTERNAL MEDICINE/MEDICINE	66469933	S352L5PJLMP8	66469933	S352L5PJLMP8	US	33.791247	-84.3249	2384501	EMORY U		Non_Elite	female	88	ATLANTA	GA	SCHOOLS OF MEDICINE	303221007	UNITED STATES	N	39326	39660	989	Other Research-Related	2007	79560	FIC	79560	#N/A
NHLBI	7384653	39435	PA-06-133	1K99HL088372-01A1	1	K99	HL	88372	1	A	COMMARATO, MICHAEL	39479	39844	ZHL1-CSR-S(O1)	8671612	7	PUBLIC HEALTH & PREV MEDICINE	149617367	UNVDZNFA8R29	149617367	UNVDZNFA8R29	US	42.335306	-71.102775	3212904	HARVARD SCH OF PUBLIC HEALTH		Elite	female	98	BOSTON	MA	SCHOOLS OF PUBLIC HEALTH	21156028	UNITED STATES	N	39479	39844	837	Other Research-Related	2008	90000	NHLBI	90000	coastal
NINDS	7324113	39436	PA-06-133	5K99NS057906-02	5	K99	NS	57906	2		MAMOUNAS, LAURA	39052	39691	ZNS1-SRB-M(38)	8630248	18	PHYSICS	9214214	HJD6G4D6TJY5	9214214	HJD6G4D6TJY5	US	37.426852	-122.17047	8046501	STANFORD U		Elite	female	75	STANFORD	CA	SCHOOLS OF ARTS AND SCIENCES	943052004	UNITED STATES	N	39417	39691	853	Other Research-Related	2008	59238	NINDS	59238	coastal
NHLBI	7385484	39442		1K99HL088550-01A1	1	K99	HL	88550	1	A	ROTHGEB, ANN E	39448	39813	ZHL1-CSR-S(O1)	1938931	At-Large	PHARMACOLOGY	10379790	DAY7Z8ZD48Q3	10379790	DAY7Z8ZD48Q3	US	46.860203	-113.983723	1381006	U OF MONTANA		Non_Elite	female	98	MISSOULA	MT	SCHOOLS OF PHARMACY	598124104	UNITED STATES	N	39448	39813	838	Other Research-Related	2008	97200	NHLBI	97200	coastal
NHLBI	7382931	39443	PA-07-297	1K99HL087563-01A1	1	K99	HL	87563	1	A	COMMARATO, MICHAEL	39479	39844	ZHL1-CSR-S(O1)	8614216	1	ANATOMY/CELL BIOLOGY	68552207	L6NFUM28LQM5	68552207	L6NFUM28LQM5	US	38.664368	-90.323797	9083901	WASHINGTON U		Non_Elite	female	98	SAINT LOUIS	MO	SCHOOLS OF MEDICINE	631304862	UNITED STATES	N	39479	39844	837	Other Research-Related	2008	86005	NHLBI	86005	coastal
NEI	7386183	39478	PA-07-297	1K99EY018131-01A1	1	K99	EY	18131	1	A	GREENWELL, THOMAS	39479	39844	ZEY1-VSN(03)	6268195	1	OPHTHALMOLOGY	68552207	L6NFUM28LQM5	68552207	L6NFUM28LQM5	US	38.664368	-90.323797	9083901	WASHINGTON U		Non_Elite	female	98	SAINT LOUIS	MO	SCHOOLS OF MEDICINE	631304862	UNITED STATES	N	39479	39844	867	Other Research-Related	2008	86221	NEI	86221	#N/A
NHLBI	7323281	39478		5K99HL088017-02	5	K99	HL	88017	2		PRATT, CHARLOTTE A	39052	40080	ZHL1-CSR-M(F1)	8668829	53	PUBLIC HEALTH & PREV MEDICINE	73371346	H59JKGFZKHL7	73371346	H59JKGFZKHL7	US	32.762178	-117.069156	513614	SAN DIEGO STATE U		Non_Elite	female	97	SAN DIEGO	CA	GRADUATE SCHOOLS	921821901	UNITED STATES	N	39417	40080	837	Other Research-Related	2008	90000	NHLBI	90000	coastal
NHLBI	7323260	39478	PA-06-133	5K99HL087462-02	5	K99	HL	87462	2		CARLSON, DREW E	39052	39715	ZHL1-CSR-M(F1)	7252103	3	PHYSIOLOGY	832127323	DLWBSLWAJWR1	832127323	DLWBSLWAJWR1	US	39.999598	-83.033131	6218701	OHIO STATE U		Non_Elite	female	98	COLUMBUS	OH	SCHOOLS OF MEDICINE	432101016	UNITED STATES	N	39417	39715	837	Other Research-Related	2008	90000	NHLBI	90000	#N/A
NHLBI	7323262	39485	PA-06-133	5K99HL087607-02	5	K99	HL	87607	2		CARLSON, DREW E	39052	39782	ZHL1-CSR-M(F1)	8670293	7	SURGERY	603007902	SHHBRBAPSM35	603007902; 625168166	DKNHLK3NBPH7; DL9MTNNKWYR9; GY8GKRUWM7D5; HA48EWMJFV47; HCNBFNDANNV5; HCRDU7BNPZ13; HCWTYJ7KQ4U6; HEBLAL94JHP7; NKCRSKVJBXE3; SHHBRBAPSM35; TA1NYNZ27LQ7; WJJRCLJ936C8; X51WYC1QEPD7; XNBJV454V2W1; YCJNP5NJYCY1; YW8WNKKANDR9	US	39.779213	-86.175288	577806	INDIANA U PURDUE U AT INDIANAPOLIS		Non_Elite	female	97	INDIANAPOLIS	IN	SCHOOLS OF MEDICINE	462022915	UNITED STATES	N	39417	39782	837	Other Research-Related	2008	90000	NHLBI	90000	#N/A
NIDA	7324828	39499	PA-06-133	5K99DA023700-02	5	K99	DA	23700	2		WU, DA-YU	39052	39629	ZMH1-ERB-H(06)	8631011	49	Unavailable	78731668	NNJ6BMBTFGN5	78731668	NNJ6BMBTFGN5	US	32.8863	-117.243929	7210001	SALK INST FOR BIOLOGICAL STUDIES		Non_Elite	female	60	La Jolla	CA	Research Institutes	920371002	UNITED STATES	N	39417	39629	279	Other Research-Related	2008	80608	NIDA	80608	coastal
NIMH	7360660	39506	PA-07-297	1K99MH082106-01	1	K99	MH	82106	1		DESMOND, NANCY L	39508	39872	ZMH1-ERB-H(09)	2049314	7	NEUROSCIENCES	63690705	YND4PLMC9AN7	63690705	YND4PLMC9AN7	US	33.50591	-86.799772	1288803	U OF ALABAMA AT BIRMINGHAM		Non_Elite	female	91	BIRMINGHAM	AL	SCHOOLS OF MEDICINE	352940001	UNITED STATES	N	39508	39872	281	Other Research-Related	2008	84348	NIMH	84348	coastal
NIDDK	7324820	39511	PA-06-133	5K99DK077573-02	5	K99	DK	77573	2		LAUGHLIN, MAREN R	39173	40080	Diabetes, Endocrinology and Metabolic Diseases B Study Section[DDK-B]	7688436	17	VETERINARY SCIENCES	847205713	KU3DCFJJTVN3	847205713	KU3DCFJJTVN3	US	30.611331	-96.348373	8266920	TEXAS A&M AGRILIFE RES	2561	Non_Elite	female	99	College Station	TX	SCHOOLS OF VETERINARY MEDICINE	77845	UNITED STATES	N	39539	40080	847	Other Research-Related	2008	89662	NIDDK	89662	coastal
NCI	7513097	39512	PA-06-133	7K99CA126186-02	7	K99	CA	126186	2		SCHMIDT, MICHAEL K	39052	39782	ZCA1-RTRB-A(O1)	9478607	13	BIOCHEMISTRY	124726725	GS3YEVSS12N6	124726725	GS3YEVSS12N6	US	37.870017	-122.268624	577502	U OF CALIFORNIA BERKELEY		Elite	female	58	BERKELEY	CA	SCHOOLS OF ARTS AND SCIENCES	947101749	UNITED STATES	N	39417	39782	398	Other Research-Related	2008	114782	NCI	114782	#N/A
NINDS	7367933	39517	PA-06-133	5K99NS058391-02	5	K99	NS	58391	2		MAMOUNAS, LAURA	39173	39903	ZNS1-SRB-M(41)	8655671	7	Unavailable	76593722	Z1L9F1MM1RY3	76593722	Z1L9F1MM1RY3	US	42.337481	-71.104964	1504801	BOSTON CHILDRENS HOSP		Elite	female	75	BOSTON	MA	Independent Hospitals	21155724	UNITED STATES	N	39539	39903	853	Other Research-Related	2008	89214	NINDS	89214	coastal
NINDS	7492908	39524	PA-06-133	5K99NS059841-02	5	K99	NS	59841	2		SILBERBERG, SHAI D	39340	39782	ZNS1-SRB-M(44)	8740970	14	PHYSIOLOGY	110521739		110521739		US	40.85103	-73.844379	9433501	ALBERT EINSTEIN COLL OF MED		Non_Elite	female	92	BRONX	NY	SCHOOLS OF MEDICINE	104611900	UNITED STATES	N	39539	39782	853	Other Research-Related	2008	90000	NINDS	90000	coastal
NIGMS	7404454	39535	PA-06-133	5K99GM080352-02	5	K99	GM	80352	2		DEATHERAGE, JAMES F	39187	39903	ZGM1-BRT-9(KR)	8661302	49	Unavailable	781613492	PHZJFZ32NKH4	781613492	PHZJFZ32NKH4	US	32.903062	-117.243592	7375802	SCRIPPS RES INST THE		Non_Elite	female	88	LA JOLLA	CA	Other Domestic Non-Profits	920371000	UNITED STATES	N	39539	39903	859	Other Research-Related	2008	90000	NIGMS	90000	coastal
NCI	7380077	39567	PA-06-133	7K99CA127361-02	7	K99	CA	127361	2		SCHMIDT, MICHAEL K	39173	39903	ZCA1-RTRB-2(J1)	8669533	7	NONE	603007902	SHHBRBAPSM35	603007902; 625168166	DKNHLK3NBPH7; DL9MTNNKWYR9; GY8GKRUWM7D5; HA48EWMJFV47; HCNBFNDANNV5; HCRDU7BNPZ13; HCWTYJ7KQ4U6; HEBLAL94JHP7; NKCRSKVJBXE3; SHHBRBAPSM35; TA1NYNZ27LQ7; WJJRCLJ936C8; X51WYC1QEPD7; XNBJV454V2W1; YCJNP5NJYCY1; YW8WNKKANDR9	US	39.779213	-86.175288	577806	INDIANA U PURDUE U AT INDIANAPOLIS		Non_Elite	female	91	INDIANAPOLIS	IN	SCHOOLS OF MEDICINE	462022915	UNITED STATES	N	39567	39903	398	Other Research-Related	2008	127754	NCI	127754	coastal
NCI	7418975	39569	PA-06-133	5K99CA127462-02	5	K99	CA	127462	2		SCHMIDT, MICHAEL K	39234	39648	ZCA1-RTRB-2(J1)	7253225	9	ANATOMY/CELL BIOLOGY	51113330	FXKMA43NTV21	51113330	FXKMA43NTV21	US	29.70926	-95.400851	481201	BAYLOR COLL OF MED		Non_Elite	female	98	HOUSTON	TX	SCHOOLS OF MEDICINE	770303411	UNITED STATES	N	39600	39648	398	Other Research-Related	2008	17010	NCI	17010	#N/A
NICHD	7471088	39583	PA-06-133	1K99HD056491-01A1	1	K99	HD	56491	1	A	LAMAR, CHARISEE A	39600	39964	Reproduction, Andrology, and Gynecology Study Section[CHHD-R]	8559056	30	INTERNAL MEDICINE/MEDICINE	800771545	YZJ6DKPM4W63	800771545	YZJ6DKPM4W63	US	32.811963	-96.837534	578404	UT SOUTHWESTERN MED CTR		Non_Elite	female	98	DALLAS	TX	SCHOOLS OF MEDICINE	753909105	UNITED STATES	N	39600	39964	864	Other Research-Related	2008	86967	NICHD	86967	coastal
NIAMS	7451037	39587	PA-06-133	5K99AR054775-02	5	K99	AR	54775	2		BAKER, CARL	39253	39813	Arthritis and Musculoskeletal and Skin Diseases Special Grants Study Section[AMS]	8663405	12	BIOLOGY	71037113	LHGDNJMZ64Y1	71037113	LHGDNJMZ64Y1	US	40.763746	-73.955386	7056601	ROCKEFELLER U		Non_Elite	female	97	NEW YORK	NY	GRADUATE SCHOOLS	100656399	UNITED STATES	N	39600	39813	846	Other Research-Related	2008	90000	NIAMS	90000	coastal
NIDA	7363851	39595	PA-07-297	1K99DA024135-01	1	K99	DA	24135	1		HARTSOCK, PETER	39600	40025	ZDA1-GXM-A(35)	8838230	52	FAMILY MEDICINE	804355790	UYTTZT6G9DT1	804355790	UYTTZT6G9DT1	US	32.876991	-117.24087	577507	U OF CALIFORNIA SAN DIEGO		Elite	female	98	LA JOLLA	CA	SCHOOLS OF MEDICINE	920930621	UNITED STATES	N	39600	40025	279	Other Research-Related	2008	90000	NIDA	90000	coastal
NCI	7469587	39596	PA-06-133	5K99CA129070-02	5	K99	CA	129070	2		SCHMIDT, MICHAEL K	39276	39994	ZCA1-RTRB-A(M1)	8683425	8	Unavailable	73130411	FLJ7DQKLL226	73130411	FLJ7DQKLL226	US	42.363198	-71.068772	4907701	MASSACHUSETTS GENERAL HOSP		Elite	female	93	BOSTON	MA	Independent Hospitals	21142621	UNITED STATES	N	39630	39994	398	Other Research-Related	2008	141750	NCI	141750	coastal
NCI	7471708	39596	PA-07-297	1K99CA125974-01A2	1	K99	CA	125974	1	A	SCHMIDT, MICHAEL K	39600	39964	Institutional Training and Education Study Section (F)[NCI-F]	8629127	7	Unavailable	76580745	DPMGH9MG1X67	76580745	DPMGH9MG1X67	US	42.337593	-71.108279	1464901	DANA FARBER CANCER INST		Elite	female	98	BOSTON	MA	Independent Hospitals	22155450	UNITED STATES	N	39600	39964	398	Other Research-Related	2008	102952	NCI	102952	#N/A
NIDDK	7324818	39598	PA-06-133	5K99DK077427-02	5	K99	DK	77427	2		HAFT, CAROL R	39264	40177	Diabetes, Endocrinology and Metabolic Diseases B Study Section[DDK-B]	8630135	12	PHYSIOLOGY	94878337	KMH5K9V7S518	94878337	KMH5K9V7S518	US	37.767442	-122.413937	577508	U OF CALIFORNIA SAN FRANCISCO		Elite	female	90	SAN FRANCISCO	CA	SCHOOLS OF MEDICINE	941432510	UNITED STATES	N	39630	40177	847	Other Research-Related	2008	90000	NIDDK	90000	#N/A
NINR	7492307	39605	PA-06-133	5K99NR010797-02	5	K99	NR	10797	2		MARDEN, SUSAN F	39329	40237	ZNS1-SRB-M(44)	8801997	At-Large	Unavailable	38004941	ETGMYV7CKAJ7	38004941	ETGMYV7CKAJ7	US	39.778191	-75.557506	1804102	ALFRED I DUPONT HOSP FOR CHILDREN		Non_Elite	female	98	WILMINGTON	DE	Independent Hospitals	198033607	UNITED STATES	N	39600	40237	361	Other Research-Related	2008	86940	NINR	86940	coastal
NICHD	7384626	39608	PA-07-297	1K99HD055053-01A1	1	K99	HD	55053	1	A	ILEKIS, JOHN V	39612	39964	Obstetrics and Maternal-Fetal Biology Study Section[CHHD-B]	8614486	3	OBSTETRICS & GYNECOLOGY	96997515	NPSNT86JKN51	96997515	NPSNT86JKN51	US	45.49882	-122.685647	6297007	OREGON HEALTH & SCI U		Non_Elite	female	62	PORTLAND	OR	PRIMATE CENTERS	972393098	UNITED STATES	N	39612	39964	865	Other Research-Related	2008	84205	NICHD	84205	coastal
NIDDK	7456334	39610	PA-06-133	5K99DK078756-02	5	K99	DK	78756	2		MARGOLIS, RONALD N	39264	40359	Diabetes, Endocrinology and Metabolic Diseases B Study Section[DDK-B]	8552815	52	INTERNAL MEDICINE/MEDICINE	804355790	UYTTZT6G9DT1	804355790	UYTTZT6G9DT1	US	32.876991	-117.24087	577507	U OF CALIFORNIA SAN DIEGO		Elite	female	99	LA JOLLA	CA	SCHOOLS OF MEDICINE	920930621	UNITED STATES	N	39630	40359	847	Other Research-Related	2008	85860	NIDDK	85860	coastal
NIMH	7394445	39612	PA-06-133	5K99MH080003-02	5	K99	MH	80003	2		CHAVEZ, MARK	39264	39994	ZMH1-ERB-H(03)	8362732	52	PSYCHIATRY	804355790	UYTTZT6G9DT1	804355790	UYTTZT6G9DT1	US	32.876991	-117.24087	577507	U OF CALIFORNIA SAN DIEGO		Elite	female	98	LA JOLLA	CA	SCHOOLS OF MEDICINE	920930621	UNITED STATES	N	39630	39994	281	Other Research-Related	2008	67765	NIMH	67765	#N/A
NINDS	7531100	39617	PA-07-297	1K99NS060985-01A1	1	K99	NS	60985	1	A	RIDDLE, ROBERT D	39630	39994	ZNS1-SRB-M(56)	7983160	2	GENETICS	161202122	LCLSJAGTNZQ7	161202122	LCLSJAGTNZQ7	US	43.068519	-89.400858	578503	U OF WISCONSIN MADISON		Elite	female	100	MADISON	WI	EARTH SCIENCES/RESOURCES	537151218	UNITED STATES	N	39630	39994	853	Other Research-Related	2008	88830	NINDS	88830	coastal
NINR	7492318	39622	PA-06-133	5K99NR010798-02	5	K99	NR	10798	2		TIGNO, XENIA	39329	39964	Developmental Biology Study Section[CHHD-C]	8644615	6	OBSTETRICS & GYNECOLOGY	937727907	SN7KD2UK7GC5	937727907	SN7KD2UK7GC5	US	36.059402	-80.321981	9021205	WAKE FOREST U HEALTH SCI		Non_Elite	female	69	WINSTON-SALEM	NC	SCHOOLS OF MEDICINE	271570001	UNITED STATES	N	39622	39964	361	Other Research-Related	2008	89173	NINR	89173	coastal
NHLBI	7483611	39624	PA-06-133	5K99HL089412-02	5	K99	HL	89412	2		COMMARATO, MICHAEL	39309	40025	ZHL1-CSR-S(M1)	3084573	4	INTERNAL MEDICINE/MEDICINE	44387793	TP7EK8DZV6N5	44387793	TP7EK8DZV6N5	US	36.007766	-78.926475	2221101	DUKE U		Elite	female	98	DURHAM	NC	SCHOOLS OF MEDICINE	277054673	UNITED STATES	N	39661	40025	837	Other Research-Related	2008	82485	NHLBI	82485	coastal
NIA	7479250	39626	PA-06-133	5K99AG029710-02	5	K99	AG	29710	2		MACKIEWICZ, MIROSLAW	39309	39691	Basic Neuroscience of Aging Study Section[NIA-N]	7012477	13	PSYCHOLOGY	124726725	GS3YEVSS12N6	124726725	GS3YEVSS12N6	US	37.870017	-122.268624	577502	U OF CALIFORNIA BERKELEY		Elite	female	99	BERKELEY	CA	SCHOOLS OF ARTS AND SCIENCES	947101749	UNITED STATES	N	39661	39691	866	Other Research-Related	2008	6712	NIA	6712	coastal
NCI	7449286	39630	PA-07-297	1K99CA133181-01	1	K99	CA	133181	1		SCHMIDT, MICHAEL K	39630	40076	Institutional Training and Education Study Section (F)[NCI-F]	8547506	6	INTERNAL MEDICINE/MEDICINE	617022384		617022384		US	40.526474	-74.470981	714203	U OF MED/DENT NJ R W JOHNSON MED SCH		Non_Elite	female	98	PISCATAWAY	NJ	SCHOOLS OF MEDICINE	88548021	UNITED STATES	N	39630	40076	398	Other Research-Related	2008	141238	NCI	141238	coastal
NIDDK	7496534	39639	PA-06-133	5K99DK080080-02	5	K99	DK	80080	2		HAFT, CAROL R	39345	39721	Diabetes, Endocrinology and Metabolic Diseases B Study Section[DDK-B]	8906409	13	PHYSIOLOGY	621889815	QHF5ZZ114M72	621889815	QHF5ZZ114M72	US	40.8415	-73.9414	1833205	COLUMBIA U HEALTH SCI		Elite	female	75	NEW YORK	NY	SCHOOLS OF MEDICINE	100323725	UNITED STATES	N	39692	39721	847	Other Research-Related	2008	91080	NIDDK	91080	#N/A
NIBIB	7513222	39659	PA-07-297	1K99EB008737-01	1	K99	EB	8737	1		ERIM, ZEYNEP	39661	40025	ZEB1-OSR-E(M1)S	9247348	8	Unavailable	73130411	FLJ7DQKLL226	73130411	FLJ7DQKLL226	US	42.363198	-71.068772	4907701	MASSACHUSETTS GENERAL HOSP		Elite	female	66	BOSTON	MA	Independent Hospitals	21142621	UNITED STATES	N	39661	40025	286	Other Research-Related	2008	90000	NIBIB	90000	coastal
NIAAA	7479191	39660	PA-06-133	5K99AA017376-02	5	K99	AA	17376	2		GAO, PETER	39295	40209	Digestive Diseases and Nutrition C Study Section[DDK-C]	2196764	4	INTERNAL MEDICINE/MEDICINE	44387793	TP7EK8DZV6N5	44387793	TP7EK8DZV6N5	US	36.007766	-78.926475	2221101	DUKE U		Elite	female	97	DURHAM	NC	SCHOOLS OF MEDICINE	277054673	UNITED STATES	N	39661	40209	273	Other Research-Related	2008	81881	NIAAA	81881	coastal
NCI	7474716	39661	PA-06-133	5K99CA126147-02	5	K99	CA	126147	2		SCHMIDT, MICHAEL K	39295	40025	ZCA1-RTRB-A(O1)	8576491	8	Unavailable	73130411	FLJ7DQKLL226	73130411	FLJ7DQKLL226	US	42.363198	-71.068772	4907701	MASSACHUSETTS GENERAL HOSP		Elite	female	98	BOSTON	MA	Independent Hospitals	21142621	UNITED STATES	N	39675	40025	398	Other Research-Related	2008	142155	NCI	142155	#N/A
NHLBI	7530478	39664	PA-07-297	1K99HL091177-01A1	1	K99	HL	91177	1	A	COMMARATO, MICHAEL	39668	40025	ZHL1-CSR-S(M1)	8908616	12	PHYSIOLOGY	966668691	N4WWJC8T2593	809593387; 966668691	JJJNQAJY5RN6; N4WWJC8T2593	US	33.470962	-81.991405	676605	AUGUSTA U	809	Non_Elite	female	98	AUGUSTA	GA	SCHOOLS OF MEDICINE	309120004	UNITED STATES	N	39668	40025	837	Other Research-Related	2008	90000	NHLBI	90000	coastal
NIDCD	7496603	39668	PA-07-297	5K99DC009279-02	5	K99	DC	9279	2		SKLARE, DAN	39340	40059	Communication Disorders Review Committee[CDRC]	8745446	7	MICROBIOLOGY/IMMUN/VIROLOGY	188435911	Z9CRZKD42ZT1	188435911	Z9CRZKD42ZT1	US	39.292248	-76.625629	820104	U OF MARYLAND BALTIMORE		Non_Elite	female	73	BALTIMORE	MD	SCHOOLS OF DENTISTRY/ORAL HYGN	212011508	UNITED STATES	N	39692	40059	173	Other Research-Related	2008	108000	NIDCD	108000	#N/A
NEI	7491016	39672	PA-06-133	5K99EY018407-02	5	K99	EY	18407	2		OBERDORFER, MICHAEL	39326	40056	ZEY1-VSN(03)	2218161	3	NEUROLOGY	42250712	GM1XX56LEP58	42250712	GM1XX56LEP58	US	39.953462	-75.193983	6463801	U OF PENNSYLVANIA		Elite	female	98	PHILADELPHIA	PA	SCHOOLS OF MEDICINE	191046205	UNITED STATES	N	39692	40056	867	Other Research-Related	2008	76874	NEI	76874	#N/A
NIEHS	7448763	39678	PA-07-297	1K99ES016586-01	1	K99	ES	16586	1		SHREFFLER, CAROL A	39692	40056	Environmental Health Sciences Review Committee[EHS(E1)]	8644937	1	Unavailable	45911138	N1UBCLRAPNG6	45911138	N1UBCLRAPNG6	US	35.056187	-106.579056	679302	LOVELACE BIOMED & ENVIRONMENTAL RES INST		Non_Elite	female	96	Albuquerque	NM	Research Institutes	871085127	UNITED STATES	N	39692	40056	113	Other Research-Related	2008	93750	NIEHS	93750	coastal
NICHD	7496627	39679	PA-06-133	5K99HD056965-02	5	K99	HD	56965	2		RAITEN, DANIEL J	39340	40056	Obstetrics and Maternal-Fetal Biology Study Section[CHHD-B]	6615329	12	PATHOLOGY	94878337	KMH5K9V7S518	94878337	KMH5K9V7S518	US	37.767442	-122.413937	577508	U OF CALIFORNIA SAN FRANCISCO		Elite	female	98	SAN FRANCISCO	CA	SCHOOLS OF MEDICINE	941432510	UNITED STATES	N	39692	40056	865	Other Research-Related	2008	84732	NICHD	84732	coastal
NIDA	7499019	39680	PA-06-133	5K99DA024012-02	5	K99	DA	24012	2		DEEDS, BETHANY	39345	40056	ZDA1-GXM-A(35)	8617477	7	PUBLIC HEALTH & PREV MEDICINE	98987217	W8XEAJDKMXH3	98987217	W8XEAJDKMXH3	US	41.871509	-87.667721	577703	U OF ILLINOIS AT CHICAGO		Non_Elite	female	61	Chicago	IL	SCHOOLS OF PUBLIC HEALTH	606124305	UNITED STATES	N	39692	40056	277	Other Research-Related	2008	56468	NIDA	56468	coastal
NCI	7472660	39681	PA-07-297	1K99CA128926-01A1	1	K99	CA	128926	1	A	SCHMIDT, MICHAEL K	39681	39813	Institutional Training and Education Study Section (F)[NCI-F]	6933066	30	PHARMACOLOGY	800771545	YZJ6DKPM4W63	800771545	YZJ6DKPM4W63	US	32.811963	-96.837534	578404	UT SOUTHWESTERN MED CTR		Non_Elite	female	98	DALLAS	TX	SCHOOLS OF MEDICINE	753909105	UNITED STATES	N	39681	39813	398	Other Research-Related	2008	94406	NCI	94406	#N/A
NIAID	7356831	39682	PA-07-297	1K99AI076346-01	1	K99	AI	76346	1		PARK, EUN-CHUNG	39692	39994	Microbiology and Infectious Diseases B Research Study Section[MID-B]	7895629	5	MICROBIOLOGY/IMMUN/VIROLOGY	66469933	S352L5PJLMP8	66469933	S352L5PJLMP8	US	33.791247	-84.3249	2384501	EMORY U		Non_Elite	female	98	ATLANTA	GA	SCHOOLS OF MEDICINE	303221007	UNITED STATES	N	39692	39994	855	Other Research-Related	2008	87815	NIAID	87815	#N/A
NINDS	7497964	39685	PAR-00-122	5K99NS052524-02	5	K99	NS	52524	2		RIDDLE, ROBERT D	39344	40056	Neurological Sciences Training Initial Review Group[NST]	1861738	9	Unavailable	6046700	YH86RTW2YVJ4	6046700	YH86RTW2YVJ4	US	39.172055	-86.523157	577805	TRUSTEES OF INDIANA U		Non_Elite	female	96	BLOOMINGTON	IN	Domestic Higher Education	474013654	UNITED STATES	N	39692	40056	853	Other Research-Related	2008	90000	NINDS	90000	coastal
NICHD	7509691	39686	PA-07-297	1K99HD058793-01	1	K99	HD	58793	1		NICHOLSON, CAROL E	39692	39844	Obstetrics and Maternal-Fetal Biology Study Section[CHHD-B]	9233392	18	PEDIATRICS	9214214	HJD6G4D6TJY5	9214214	HJD6G4D6TJY5	US	37.426852	-122.17047	8046501	STANFORD U		Elite	female	95	STANFORD	CA	SCHOOLS OF MEDICINE	943052004	UNITED STATES	N	39692	39844	865	Other Research-Related	2008	45001	NICHD	45001	coastal
NIDDK	7497149	39687	PA-07-297	5K99DK080643-02	5	K99	DK	80643	2		HOSHIZAKI, DEBORAH K	39345	39947	Kidney, Urologic and Hematologic Diseases D Study Section[DDK-D]	7795588	1	MICROBIOLOGY/IMMUN/VIROLOGY	68552207	L6NFUM28LQM5	68552207	L6NFUM28LQM5	US	38.664368	-90.323797	9083901	WASHINGTON U		Non_Elite	female	97	SAINT LOUIS	MO	SCHOOLS OF MEDICINE	631304862	UNITED STATES	N	39692	39947	849	Other Research-Related	2008	83759	NIDDK	83759	coastal
NIMH	7500718	39694	PA-07-297	5K99MH080100-02	5	K99	MH	80100	2		HILL, LAUREN D	39351	40390	ZMH1-ERB-H(09)	7075400	3	PSYCHIATRY	42250712	GM1XX56LEP58	42250712	GM1XX56LEP58	US	39.953462	-75.193983	6463801	U OF PENNSYLVANIA		Elite	female	75	PHILADELPHIA	PA	SCHOOLS OF MEDICINE	191046205	UNITED STATES	N	39661	40390	281	Other Research-Related	2008	89989	NIMH	89989	coastal
NIDA	7496083	39699	PA-06-133	5K99DA022891-02	5	K99	DA	22891	2		CAULDER, MARK	39340	40056	ZDA1-GXM-A(05)	8614937	3	PSYCHIATRY	43207562	FL6GV84CKN57	43207562	FL6GV84CKN57	US	41.310925	-72.926428	9420201	YALE U		Elite	female	90	NEW HAVEN	CT	SCHOOLS OF MEDICINE	65208327	UNITED STATES	N	39692	40056	277	Other Research-Related	2008	88540	NIDA	88540	coastal
NEI	7494951	39700	PA-06-133	5K99EY018053-02	5	K99	EY	18053	2		SHEN, GRACE L	39355	40056	ZEY1-VSN(03)	8630713	12	BIOCHEMISTRY	966668691	N4WWJC8T2593	809593387; 966668691	JJJNQAJY5RN6; N4WWJC8T2593	US	33.470962	-81.991405	676605	AUGUSTA U		Non_Elite	female	98	AUGUSTA	GA	SCHOOLS OF MEDICINE	309120004	UNITED STATES	N	39692	40056	867	Other Research-Related	2008	90000	NEI	90000	#N/A
NHGRI	7513111	39700	PA-07-297	1K99HG004724-01	1	K99	HG	4724	1		GOOD, PETER J	39701	40056	Genome Research Study Section[GNOM-G]	9245891	27	NONE	9584210	U2JMKHNS5TG4	9584210	U2JMKHNS5TG4	US	34.134332	-118.12652	1073501	CALIFORNIA INST OF TECHNOLOGY		Elite	female	61	PASADENA	CA	SCHOOLS OF ARTS AND SCIENCES	911250001	UNITED STATES	N	39701	40056	172	Other Research-Related	2008	89100	NHGRI	89100	coastal
NIDDK	7586890	39707	PA-07-297	1K99DK080774-01A1	1	K99	DK	80774	1	A	RYS-SIKORA, KRYSTYNA E	39716	40056	Kidney, Urologic and Hematologic Diseases D Study Section[DDK-D]	8924186	3	PHARMACOLOGY	16060860	YXJGGNC5J269	16060860	YXJGGNC5J269	US	39.026584	-94.636347	1484303	U OF KANSAS MED CTR	2188	Non_Elite	female	97	KANSAS CITY	KS	SCHOOLS OF MEDICINE	661608500	UNITED STATES	N	39716	40056	849	Other Research-Related	2008	90000	NIDDK	90000	#N/A
NCI	7324066	39708	PA-06-133	7K99CA125937-02	7	K99	CA	125937	2		SCHMIDT, MICHAEL K	39326	40056	ZCA1-RTRB-A(O1)	8625946	9	ANATOMY/CELL BIOLOGY	51113330	FXKMA43NTV21	51113330	FXKMA43NTV21	US	29.70926	-95.400851	481201	BAYLOR COLL OF MED		Non_Elite	female	51	HOUSTON	TX	SCHOOLS OF MEDICINE	770303411	UNITED STATES	N	39692	40056	398	Other Research-Related	2008	89179	NCI	89179	coastal
NHLBI	7472653	39715	PA-07-297	1K99HL089361-01A1	1	K99	HL	89361	1	A	COMMARATO, MICHAEL	39716	39994	ZHL1-CSR-S(F1)	8508633	1	BIOLOGY	172750234	QB12VPNQQFE8	172750234	QB12VPNQQFE8	US	30.688966	-88.189832	130401	U OF SOUTH ALABAMA	679	Non_Elite	female	98	MOBILE	AL	SCHOOLS OF MEDICINE	366880002	UNITED STATES	N	39716	39994	837	Other Research-Related	2008	68502	NHLBI	68502	#N/A
NINR	7409636	39717	PA-06-133	5K99NR010495-02	5	K99	NR	10495	2		BOYINGTON, JOSEPHINE	39326	40025	Behavior and Social Science of Aging Study Section[NIA-S]	8648040	13	INTERNAL MEDICINE/MEDICINE	78861598	C8H9CNG1VBD9	78861598	C8H9CNG1VBD9	US	40.790284	-73.946781	3839801	ICAHN SCH OF MED AT MOUNT SINAI	3044	Non_Elite	female	98	NEW YORK	NY	SCHOOLS OF MEDICINE	100296574	UNITED STATES	N	39717	40025	361	Other Research-Related	2008	88938	NINR	88938	#N/A
NIEHS	7512002	39720	PA-07-297	1K99ES017367-01	1	K99	ES	17367	1		SHREFFLER, CAROL A	39720	40056	ZGM1-BRT-9(KR)	8305395	37	BIOLOGY	72933393	G88KLJR3KYT5	72933393	G88KLJR3KYT5	US	34.017282	-118.281254	7636101	U OF SOUTHERN CALIFORNIA		Non_Elite	female	98	Los Angeles	CA	SCHOOLS OF ARTS AND SCIENCES	900894304	UNITED STATES	N	39720	40056	113	Other Research-Related	2008	90000	NIEHS	90000	#N/A
NIGMS	7573591	39773	PA-07-297	1K99GM086683-01	1	K99	GM	86683	1		CARTER, ANTHONY D	39783	40062	ZGM1-BRT-9(KR)	7077038	5	BIOLOGY	965717143	GTNBNWXJ12D5	965717143	DWH7MSXKA2A8; GTNBNWXJ12D5	US	36.143381	-86.803365	8721001	VANDERBILT U		Non_Elite	female	96	Nashville	TN	SCHOOLS OF ARTS AND SCIENCES	372032408	UNITED STATES	N	39783	40062	859	Other Research-Related	2009	70252	NIGMS	70252	coastal
NIGMS	7534785	39776	PA-06-133	5K99GM083147-02	5	K99	GM	83147	2		FLICKER, PAULA F	39417	40056	ZGM1-BRT-9(KR)	8897254	12	BIOCHEMISTRY	73133571	GNJ7BBP73WE9	73133571	GNJ7BBP73WE9	US	42.275494	-83.743038	1506502	U OF MICHIGAN AT ANN ARBOR		Elite	female	98	ANN ARBOR	MI	SCHOOLS OF ARTS AND SCIENCES	481091276	UNITED STATES	N	39783	40056	859	Other Research-Related	2009	90000	NIGMS	90000	coastal
NIGMS	7535028	39776	PA-07-297	5K99GM083343-02	5	K99	GM	83343	2		OKITA, RICHARD T	39417	39813	ZGM1-BRT-9(KR)	8891689	7	BIOLOGY	1425594	E2NYLCDML6V1	1425594	E2NYLCDML6V1	US	42.359128	-71.093339	4911501	MASSACHUSETTS INST OF TECHNOLOGY		Elite	female	96	CAMBRIDGE	MA	SCHOOLS OF ARTS AND SCIENCES	21421029	UNITED STATES	N	39783	39813	859	Other Research-Related	2009	7500	NIGMS	7500	coastal
NEI	7577546	39846	PA-07-297	5K99EY018680-02	5	K99	EY	18680	2		WIGGS, CHERI	39508	40237	ZEY1-VSN(03)	8909234	8	Unavailable	73826000	XQQJEDK7JC21	73826000	XQQJEDK7JC21	US	42.36199	-71.06442	6948301	SCHEPENS EYE RES INST		Elite	female	98	BOSTON	MA	Research Institutes	21142508	UNITED STATES	N	39873	40237	867	Other Research-Related	2009	85177	NEI	85177	#N/A
NHLBI	7560403	39846	PA-07-297	5K99HL091061-02	5	K99	HL	91061	2		COLOMBINI-HATCH, SANDRA	39479	40390	ZHL1-CSR-S(O1)	8877434	52	PHARMACOLOGY	804355790	UYTTZT6G9DT1	804355790	UYTTZT6G9DT1	US	32.876991	-117.24087	577507	U OF CALIFORNIA SAN DIEGO		Elite	female	98	LA JOLLA	CA	SCHOOLS OF MEDICINE	920930621	UNITED STATES	N	39845	40390	838	Other Research-Related	2009	84578	NHLBI	84578	coastal
NIDA	7589935	39864	PA-07-297	1K99DA024761-01A1	1	K99	DA	24761	1	A	SATTERLEE, JOHN S	39873	40117	Career Development Education and Training Study Section[NIDA-K]	7012923	7	NEUROSCIENCES	63690705	YND4PLMC9AN7	63690705	YND4PLMC9AN7	US	33.50591	-86.799772	1288803	U OF ALABAMA AT BIRMINGHAM		Non_Elite	female	92	BIRMINGHAM	AL	SCHOOLS OF MEDICINE	352940001	UNITED STATES	N	39873	40117	277	Other Research-Related	2009	105768	NIDA	105768	coastal
NHLBI	7588734	39871	PA-07-297	5K99HL092226-02	5	K99	HL	92226	2		COLOMBINI-HATCH, SANDRA	39539	40268	ZHL1-CSR-S(F1)	9110825	5	PHYSIOLOGY	66469933	S352L5PJLMP8	66469933	S352L5PJLMP8	US	33.791247	-84.3249	2384501	EMORY U		Non_Elite	female	64	ATLANTA	GA	SCHOOLS OF MEDICINE	303221007	UNITED STATES	N	39904	40268	838	Other Research-Related	2009	89100	NHLBI	89100	coastal
NIGMS	7642972	39881	PA-07-297	1K99GM087533-01	1	K99	GM	87533	1		OKITA, RICHARD T	39881	40209	ZGM1-BRT-9(KR)	8408666	7	BIOCHEMISTRY	47006379	JDLVAVGYJQ21	47006379	JDLVAVGYJQ21	US	42.335672	-71.104237	3212902	HARVARD MED SCH		Elite	female	99	BOSTON	MA	SCHOOLS OF MEDICINE	21201616	UNITED STATES	N	39881	40209	859	Other Research-Related	2009	90000	NIGMS	90000	coastal
NINDS	7616805	39900	PA-07-297	5K99NS061952-02	5	K99	NS	61952	2		MITLER, MERRILL	39569	40298	ZNS1-SRB-M(52)	7894753	6	BIOCHEMISTRY	1912864	M1LVPE5GLSD9	1912864	M1LVPE5GLSD9	US	40.481906	-74.457066	1196203	RUTGERS THE STATE U OF NJ		Non_Elite	female	98	PISCATAWAY	NJ	SCHOOLS OF ARTS AND SCIENCES	88543925	UNITED STATES	N	39934	40298	853	Other Research-Related	2009	89040	NINDS	89040	#N/A
NIGMS	7595056	39902	PA-07-297	5K99GM084293-02	5	K99	GM	84293	2		CARTER, ANTHONY D	39539	39994	ZGM1-BRT-9(KR)	9021471	3	BIOCHEMISTRY	43207562	FL6GV84CKN57	43207562	FL6GV84CKN57	US	41.310925	-72.926428	9420201	YALE U		Elite	female	98	NEW HAVEN	CT	SCHOOLS OF ARTS AND SCIENCES	65208327	UNITED STATES	N	39904	39994	859	Other Research-Related	2009	22500	NIGMS	22500	coastal
NHLBI	7659862	39903	PA-07-297	1K99HL093358-01A1	1	K99	HL	93358	1	A	CARLSON, DREW E	39904	40268	ZHL1-CSR-Z(F2)	8792955	5	BIOMEDICAL ENGINEERING	555917996	KABJZBBJ4B54	555917996	KABJZBBJ4B54	US	44.975143	-93.227003	1450402	U OF MINNESOTA		Non_Elite	female	97	MINNEAPOLIS	MN	BIOMED ENGR/COL ENGR/ENGR STA	554552070	UNITED STATES	N	39904	40268	837	Other Research-Related	2009	78908	NHLBI	78908	#N/A
NINDS	7596204	39904	PA-07-297	5K99NS062089-02	5	K99	NS	62089	2		SUTHERLAND, MARGARET L	39539	40117	ZNS1-SRB-M(52)	9095417	3	GENETICS	43207562	FL6GV84CKN57	43207562	FL6GV84CKN57	US	41.310925	-72.926428	9420201	YALE U		Elite	female	60	NEW HAVEN	CT	SCHOOLS OF MEDICINE	65208327	UNITED STATES	N	39904	40117	853	Other Research-Related	2009	90000	NINDS	90000	coastal
NIDDK	7661976	39909	PA-07-297	1K99DK081350-01A1	1	K99	DK	81350	1	A	MCKEON, CATHERINE T	39995	40359	ZDK1-GRB-W(J3)	8501321	6	BIOCHEMISTRY	937727907	SN7KD2UK7GC5	937727907	SN7KD2UK7GC5	US	36.059402	-80.321981	9021205	WAKE FOREST U HEALTH SCI	1709	Non_Elite	female	98	WINSTON-SALEM	NC	SCHOOLS OF MEDICINE	271570001	UNITED STATES	N	39995	40359	847	Other Research-Related	2009	83879	NIDDK	83879	coastal
NHLBI	7660594	39912	PA-07-297	1K99HL093064-01A1	1	K99	HL	93064	1	A	ROTHGEB, ANN E	39904	40268	ZHL1-CSR-Z(F2)	7891882	52	INTERNAL MEDICINE/MEDICINE	804355790	UYTTZT6G9DT1	804355790	UYTTZT6G9DT1	US	32.876991	-117.24087	577507	U OF CALIFORNIA SAN DIEGO		Elite	female	98	LA JOLLA	CA	SCHOOLS OF MEDICINE	920930621	UNITED STATES	N	39904	40268	837	Other Research-Related	2009	98037	NHLBI	98037	#N/A
NINDS	7572872	39916	PA-07-297	5K99NS060947-02	5	K99	NS	60947	2		TALLEY, EDMUND M	39569	40390	ZNS1-SRB-M(50)	8875061	7	PSYCHOLOGY	1425594	E2NYLCDML6V1	1425594	E2NYLCDML6V1	US	42.359128	-71.093339	4911501	MASSACHUSETTS INST OF TECHNOLOGY		Elite	female	96	CAMBRIDGE	MA	SCHOOLS OF ARTS AND SCIENCES	21421029	UNITED STATES	N	39934	40390	853	Other Research-Related	2009	90000	NINDS	90000	coastal
NIDCR	7628542	39917	PA-06-133	5K99DE018954-02	5	K99	DE	18954	2		FRIEDEN, LESLIE A	39600	40329	NIDCR Special Grants Review Committee[DSR]	8815125	18	DENTISTRY	4514360	MKAGLD59JRL1	4514360	MKAGLD59JRL1	US	40.440909	-79.959125	2059802	U OF PITTSBURGH AT PITTSBURGH		Elite	female	97	PITTSBURGH	PA	SCHOOLS OF DENTISTRY/ORAL HYGN	152133320	UNITED STATES	N	39965	40329	121	Other Research-Related	2009	89449	NIDCR	89449	#N/A
NIDDK	7805172	39920	PA-07-297	3K99DK080885-02S1	3	K99	DK	80885	2	S	SPAIN, LISA M	39539	40268	Diabetes, Endocrinology and Metabolic Diseases B Study Section[DDK-B]	9112918	6	PEDIATRICS	41096314	MW8JHK6ZYEX8	41096314	MW8JHK6ZYEX8	US	39.745098	-104.837605	1199905	U OF COLORADO DENVER		Non_Elite	female	53	Aurora	CO	SCHOOLS OF MEDICINE	800452570	UNITED STATES	N	39904	40268	847	Other Research-Related	2009	1080	NIDDK	1080	coastal
NICHD	7588912	39920	PA-07-297	5K99HD055522-02	5	K99	HD	55522	2		GRIFFIN, JAMES	39539	40025	Biobehavioral and Behavioral Sciences Study Section[CHHD-H]	7548879	1	PSYCHOLOGY	5421136	ZUE9HKT2CLC9	5421136	ZUE9HKT2CLC9	US	41.789554	-87.601172	1413601	U OF CHICAGO		Elite	female	98	CHICAGO	IL	SCHOOLS OF ARTS AND SCIENCES	606372612	UNITED STATES	N	39904	40025	865	Other Research-Related	2009	45574	NICHD	45574	coastal
NIDDK	7806865	39923	PA-06-133	3K99DK078779-02S1	3	K99	DK	78779	2	S	PODSKALNY, JUDITH M,	39326	40025	Digestive Diseases and Nutrition C Study Section[DDK-C]	7280469	5	PSYCHOLOGY	790877419	JF2BLNN4PJC3	790877419	EXTRKMMCVKS7; JF2BLNN4PJC3; WEUJG9RND395	US	30.441455	-84.297889	513804	FLORIDA STATE U	1218	Non_Elite	female	98	TALLAHASSEE	FL	SCHOOLS OF ARTS AND SCIENCES	323064166	UNITED STATES	N	39661	40025	847	Other Research-Related	2009	1080	NIDDK	1080	coastal
NIBIB	7617866	39932	PA-07-297	5K99EB008558-02	5	K99	EB	8558	2		ERIM, ZEYNEP	39569	40573	ZEB1-OSR-B(J1)S	9108274	18	ENGINEERING (ALL TYPES)	9214214	HJD6G4D6TJY5	9214214	HJD6G4D6TJY5	US	37.426852	-122.17047	8046501	STANFORD U		Elite	female	85	STANFORD	CA	BIOMED ENGR/COL ENGR/ENGR STA	943052004	UNITED STATES	N	39934	40573	286	Other Research-Related	2009	86454	NIBIB	86454	#N/A
NIEHS	7661866	39937		1K99ES016818-01A1	1	K99	ES	16818	1	A	SHREFFLER, CAROL A	39937	40298	Environmental Health Sciences Review Committee[EHS(T2)]	9242208	3	PHYSIOLOGY	806345617	ED44Y3W6P7B9	806345617	ED44Y3W6P7B9	US	32.232844	-110.959467	490201	U OF ARIZONA		Non_Elite	female	99	TUCSON	AZ	SCHOOLS OF MEDICINE	857210158	UNITED STATES	N	39937	40298	113	Other Research-Related	2009	90000	NIEHS	90000	#N/A
NIBIB	7612656	39937	PA-07-297	5K99EB008129-02	5	K99	EB	8129	2		ERIM, ZEYNEP	39569	40298	ZEB1-OSR-B(O1)S	8880152	8	Unavailable	73130411	FLJ7DQKLL226	73130411	FLJ7DQKLL226	US	42.363198	-71.068772	4907701	MASSACHUSETTS GENERAL HOSP		Elite	female	98	BOSTON	MA	Independent Hospitals	21142621	UNITED STATES	N	39934	40298	286	Other Research-Related	2009	90000	NIBIB	90000	coastal
NICHD	7620996	39939	PA-07-297	5K99HD055231-02	5	K99	HD	55231	2		ILEKIS, JOHN V	39583	39994	Obstetrics and Maternal-Fetal Biology Study Section[CHHD-B]	2094019	4	VETERINARY SCIENCES	153890272	SZPJL5ZRCLF4	153890272	SZPJL5ZRCLF4	US	38.948231	-92.327335	578002	U OF MISSOURI COLUMBIA		Non_Elite	female	98	COLUMBIA	MO	EARTH SCIENCES/RESOURCES	652110001	UNITED STATES	N	39948	39994	865	Other Research-Related	2009	89530	NICHD	89530	coastal
NIAID	7713817	39944		1K99AI083793-01	1	K99	AI	83793	1		PROGRAIS, LAWRENCE J	39948	40185	Allergy, Immunology, and Transplantation Research Committee[AITC]	8616134	7	Unavailable	59709394		59709394		US	42.33901	-71.104249	6674701	IMMUNE DISEASE INST INC		Non_Elite	female	99	BOSTON	MA	Research Institutes	21155713	UNITED STATES	N	39948	40185	855	Other Research-Related	2009	97200	NIAID	97200	#N/A
NIGMS	7820768	39948	PA-06-133	3K99GM080107-02S1	3	K99	GM	80107	2	S	CARTER, ANTHONY D	39995	40407	ZGM1-BRT-9(KR)	1952857	7	BIOLOGY	160079455	EXZVPWZBLUE8	160079455	EXZVPWZBLUE8	US	42.050479	-87.680046	6144601	NORTHWESTERN U		Elite	female	99	Chicago	IL	SCHOOLS OF ARTS AND SCIENCES	606114579	UNITED STATES	N	39995	40407	701	Other Research-Related	2009	90000	NIGMS	90000	#N/A
NHLBI	7667378	39986	PA-07-297	5K99HL093726-02	5	K99	HL	93726	2		ROLTSCH, MARK	39661	40390	ZHL1-CSR-S(M1)	9216217	1	ANATOMY/CELL BIOLOGY	68552207	L6NFUM28LQM5	68552207	L6NFUM28LQM5	US	38.664368	-90.323797	9083901	WASHINGTON U		Non_Elite	female	58	SAINT LOUIS	MO	SCHOOLS OF MEDICINE	631304862	UNITED STATES	N	40026	40390	837	Other Research-Related	2009	73064	NHLBI	73064	coastal
NINDS	7663092	39988	PA-07-297	5K99NS062901-02	5	K99	NS	62901	2		MAMOUNAS, LAURA	39661	40085	ZNS1-SRB-M(56)	10117797	7	NEUROSCIENCES	1910777	FTMTDMBR29C7	1910777	FTMTDMBR29C7	US	39.325256	-76.605131	4134401	JOHNS HOPKINS U		Elite	female	97	BALTIMORE	MD	SCHOOLS OF MEDICINE	212182680	UNITED STATES	N	39995	40085	853	Other Research-Related	2009	90000	NINDS	90000	coastal
NIAMS	7677348	39990	PA-07-297	5K99AR056298-02	5	K99	AR	56298	2		BOYCE, AMANDA T	39692	40543	Arthritis and Musculoskeletal and Skin Diseases Special Grants Study Section[AMS]	9140916	7	Unavailable	71723084	UUUMQVGJNNX1	71723084	UUUMQVGJNNX1	US	42.338497	-71.108264	2133701	JOSLIN DIABETES CTR		Elite	female	97	BOSTON	MA	Research Institutes	22155306	UNITED STATES	N	39995	40543	846	Other Research-Related	2009	89060	NIAMS	89060	coastal
NHLBI	7666851	39994	PA-06-133	5K99HL087598-02	5	K99	HL	87598	2		COMMARATO, MICHAEL	39661	40390	ZHL1-CSR-S(M1)	8630210	18	INTERNAL MEDICINE/MEDICINE	9214214	HJD6G4D6TJY5	9214214	HJD6G4D6TJY5	US	37.426852	-122.17047	8046501	STANFORD U		Elite	female	75	STANFORD	CA	SCHOOLS OF MEDICINE	943052004	UNITED STATES	N	40026	40390	837	Other Research-Related	2009	90020	NHLBI	90020	coastal
NCI	7673558	40002	PA-07-297	5K99CA128825-02	5	K99	CA	128825	2		SCHMIDT, MICHAEL K	39675	40390	Institutional Training and Education Study Section (F)[NCI-F]	8791968	14	Unavailable	139301956	DVHKP4N619V9	139301956	DVHKP4N619V9	US	28.062583	-82.419596	3736101	H LEE MOFFITT CANCER CTR & RES INST		Non_Elite	female	93	TAMPA	FL	Research Institutes	336129497	UNITED STATES	N	40026	40390	398	Other Research-Related	2009	107687	NCI	107687	coastal
NIA	7667734	40009	PA-07-297	5K99AG029879-02	5	K99	AG	29879	2		NIELSEN, LISBETH	39675	40390	Behavior and Social Science of Aging Study Section[NIA-S]	6069755	12	NONE	73133571	GNJ7BBP73WE9	73133571	GNJ7BBP73WE9	US	42.275494	-83.743038	1506502	U OF MICHIGAN AT ANN ARBOR		Elite	female	92	ANN ARBOR	MI	SCHOOLS OF SOCIAL WELFARE/WORK	481091276	UNITED STATES	N	40026	40390	866	Other Research-Related	2009	97768	NIA	97768	coastal
NIGMS	7882988	40011	PA-06-133	3K99GM081378-02S1	3	K99	GM	81378	2	S	CARTER, ANTHONY D	40014	40405	ZGM1-BRT-9(KR)	7535579	7	GENETICS	605799469	HD1WMN6945W6	605799469	HD1WMN6945W6	US	47.660307	-122.315168	9087701	U OF WASHINGTON		Elite	female	67	SEATTLE	WA	SCHOOLS OF MEDICINE	981959472	UNITED STATES	N	40014	40405	701	Other Research-Related	2009	73155	NIGMS	73155	coastal
NIDCD	7683749	40014	PA-07-297	5K99DC009634-02	5	K99	DC	9634	2		SKLARE, DAN	39686	40421	Communication Disorders Review Committee[CDRC]	8441719	18	PSYCHOLOGY	52184116	U3NKNFLNQ613	52184116	G4P3TF8PFH73; KZV2XNZZN3A8; MJ5BDF8KMQ43; U3NKNFLNQ613; U9C6D6YR7P69	US	40.442959	-79.941084	247601	CARNEGIE MELLON U		Elite	female	100	PITTSBURGH	PA	SCHOOLS OF ARTS AND SCIENCES	152133815	UNITED STATES	N	40026	40421	173	Other Research-Related	2009	87156	NIDCD	87156	coastal
NIMH	7682068	40016	PA-07-297	5K99MH084148-02	5	K99	MH	84148	2		DESMOND, NANCY L	39693	40543	ZMH1-ERB-H(05)	6676856	12	PSYCHOLOGY	2484665	NJ1YPQXQG7U5	2484665	NJ1YPQXQG7U5	US	40.345441	-74.655866	6661401	PRINCETON U		Elite	female	99	Princeton	NJ	SCHOOLS OF ARTS AND SCIENCES	85406000	UNITED STATES	N	40057	40543	281	Other Research-Related	2009	88470	NIMH	88470	coastal
NIDA	7665375	40017	PA-07-297	5K99DA023085-02	5	K99	DA	23085	2		FRANKENHEIM, JERRY	39661	40390	ZDA1-JXR-D(02)	8649809	9	ANATOMY/CELL BIOLOGY	807418939	M9ACC5DQCNL6	807418939	M9ACC5DQCNL6	US	41.619554	-83.620727	229501	U OF TOLEDO HEALTH SCI CAMPUS		Non_Elite	female	98	TOLEDO	OH	SCHOOLS OF MEDICINE	436142595	UNITED STATES	N	40026	40390	279	Other Research-Related	2009	89640	NIDA	89640	coastal
NCI	7688067	40021	PA-07-297	5K99CA127357-02	5	K99	CA	127357	2		SCHMIDT, MICHAEL K	39708	40421	Institutional Training and Education Study Section (F)[NCI-F]	6603998	3	PATHOLOGY	16060860	YXJGGNC5J269	16060860	YXJGGNC5J269	US	39.026584	-94.636347	1484303	U OF KANSAS MED CTR		Non_Elite	female	93	KANSAS CITY	KS	SCHOOLS OF MEDICINE	661608500	UNITED STATES	N	40057	40421	398	Other Research-Related	2009	123170	NCI	123170	coastal
NIGMS	7651347	40024	PA-07-297	5K99GM085013-02	5	K99	GM	85013	2		CARTER, ANTHONY D	39661	40298	ZGM1-BRT-9(KR)	6938740	12	ANATOMY/CELL BIOLOGY	94878337	KMH5K9V7S518	94878337	KMH5K9V7S518	US	37.767442	-122.413937	577508	U OF CALIFORNIA SAN FRANCISCO		Elite	female	98	SAN FRANCISCO	CA	SCHOOLS OF MEDICINE	941432510	UNITED STATES	N	40026	40298	859	Other Research-Related	2009	90000	NIGMS	90000	coastal
NICHD	7685421	40028	PA-07-297	5K99HD059068-02	5	K99	HD	59068	2		TAYMANS, SUSAN	39701	40421	Developmental Biology Study Section[CHHD-C]	6357069	18	GENETICS	9214214	HJD6G4D6TJY5	9214214	HJD6G4D6TJY5	US	37.426852	-122.17047	8046501	STANFORD U		Elite	female	98	STANFORD	CA	SCHOOLS OF MEDICINE	943052004	UNITED STATES	N	40057	40421	865	Other Research-Related	2009	130599	NICHD	130599	coastal
NCI	7687471	40035	PA-07-297	5K99CA133244-02	5	K99	CA	133244	2		SCHMIDT, MICHAEL K	39707	40421	Institutional Training and Education Study Section (F)[NCI-F]	9090320	9	SURGERY	800772139	S3GMKS8ELA16	800772139	S3GMKS8ELA16	US	29.706319	-95.397195	578407	U OF TX MD ANDERSON CAN CTR		Non_Elite	female	99	HOUSTON	TX	HOSPITALS	770304009	UNITED STATES	N	40057	40421	398	Other Research-Related	2009	136080	NCI	136080	coastal
NCI	7684172	40036	PA-07-297	5K99CA126187-02	5	K99	CA	126187	2		SCHMIDT, MICHAEL K	39699	40574	Institutional Training and Education Study Section (F)[NCI-F]	8630608	3	PHYSICS	42250712	GM1XX56LEP58	42250712	GM1XX56LEP58	US	39.953462	-75.193983	6463801	U OF PENNSYLVANIA		Elite	female	98	PHILADELPHIA	PA	SCHOOLS OF ARTS AND SCIENCES	191046205	UNITED STATES	N	40057	40574	398	Other Research-Related	2009	83233	NCI	83233	coastal
NCI	7683858	40036	PA-07-297	5K99CA126161-02	5	K99	CA	126161	2		SCHMIDT, MICHAEL K	39692	40421	Institutional Training and Education Study Section (F)[NCI-F]	8586925	6	PHARMACOLOGY	41096314	MW8JHK6ZYEX8	41096314	MW8JHK6ZYEX8	US	39.745098	-104.837605	1199905	U OF COLORADO DENVER		Non_Elite	female	98	Aurora	CO	SCHOOLS OF MEDICINE	800452570	UNITED STATES	N	40057	40421	398	Other Research-Related	2009	107019	NCI	107019	coastal
NCI	7681331	40038	PA-07-297	5K99CA131477-02	5	K99	CA	131477	2		SCHMIDT, MICHAEL K	39692	40421	Institutional Training and Education Study Section (F)[NCI-F]	8857793	10	PUBLIC HEALTH & PREV MEDICINE	129348186	TNKGNDAWB445	129348186	TNKGNDAWB445	US	40.264414	-76.674014	1524204	PENNSYLVANIA STATE		Non_Elite	female	98	HERSHEY	PA	SCHOOLS OF MEDICINE	170332360	UNITED STATES	N	40057	40421	398	Other Research-Related	2009	136566	NCI	136566	coastal
NCI	7681330	40039	PA-07-297	5K99CA131488-02	5	K99	CA	131488	2		SCHMIDT, MICHAEL K	39692	40359	Institutional Training and Education Study Section (F)[NCI-F]	2186003	12	Unavailable	64931884	KUKXRCZ6NZC2	64931884	KUKXRCZ6NZC2	US	40.764045	-73.956024	5079202	SLOAN KETTERING INST CAN RES		Non_Elite	female	99	NEW YORK	NY	Research Institutes	100656007	UNITED STATES	N	40057	40359	398	Other Research-Related	2009	139296	NCI	139296	coastal
NCI	7685282	40042	PA-07-297	5K99CA134934-02	5	K99	CA	134934	2		SCHMIDT, MICHAEL K	39699	40421	Institutional Training and Education Study Section (F)[NCI-F]	2093826	7	Unavailable	76580745	DPMGH9MG1X67	76580745	DPMGH9MG1X67	US	42.337593	-71.108279	1464901	DANA FARBER CANCER INST		Elite	female	98	BOSTON	MA	Independent Hospitals	22155450	UNITED STATES	N	40057	40421	398	Other Research-Related	2009	109912	NCI	109912	coastal
NCI	7681266	40042	PA-07-297	5K99CA134920-02	5	K99	CA	134920	2		SCHMIDT, MICHAEL K	39693	40421	Institutional Training and Education Study Section (F)[NCI-F]	9221468	8	Unavailable	73130411	FLJ7DQKLL226	73130411	FLJ7DQKLL226	US	42.363198	-71.068772	4907701	MASSACHUSETTS GENERAL HOSP		Elite	female	98	BOSTON	MA	Independent Hospitals	21142621	UNITED STATES	N	40057	40421	398	Other Research-Related	2009	142560	NCI	142560	#N/A
NHLBI	7860817	40042	PA-06-133	3K99HL089436-02S1	3	K99	HL	89436	2	S	MONDORO, TRACI	40057	40421	ZHL1-CSR-S(M1)	8541148	7	Unavailable	79532263	MY2ERHGDV956	79532263	MY2ERHGDV956	US	42.349512	-71.063308	130301	TUFTS MED CTR		Non_Elite	female	98	BOSTON	MA	Independent Hospitals	21111552	UNITED STATES	N	40057	40421	701	Other Research-Related	2009	128250	NHLBI	128250	coastal
NCI	7692200	40045	PA-07-297	5K99CA131576-02	5	K99	CA	131576	2		SCHMIDT, MICHAEL K	39715	41152	Institutional Training and Education Study Section (F)[NCI-F]	8792362	3	INTERNAL MEDICINE/MEDICINE	42250712	GM1XX56LEP58	42250712	GM1XX56LEP58	US	39.953462	-75.193983	6463801	U OF PENNSYLVANIA		Elite	female	97	PHILADELPHIA	PA	SCHOOLS OF MEDICINE	191046205	UNITED STATES	N	40057	41152	398	Other Research-Related	2009	89745	NCI	89745	#N/A
NHLBI	7707283	40049	PA-07-297	1K99HL096840-01	1	K99	HL	96840	1		ROTHGEB, ANN E	40057	40421	ZHL1-CSR-Z(M3)	9348007	7	Unavailable	30811269	QN6MS4VN7BD1	30811269	QN6MS4VN7BD1	US	42.336107	-71.107481	1080401	BRIGHAM AND WOMENS HOSP		Elite	female	98	BOSTON	MA	Independent Hospitals	21156110	UNITED STATES	N	40057	40421	837	Other Research-Related	2009	136958	NHLBI	136958	coastal
NIAAA	7693671	40053	PA-07-297	5K99AA017669-02	5	K99	AA	17669	2		WHITE, AARON	39721	40421	Epidemiology, Prevention and Behavior Research Study Section[AA-2]	7893190	7	PSYCHOLOGY	56915069	RL3YF9NM92A3	56915069	RL3YF9NM92A3	US	37.573875	-77.538399	6980601	U OF RICHMOND		Non_Elite	female	97	RICHMOND	VA	SCHOOLS OF ARTS AND SCIENCES	231730001	UNITED STATES	N	40057	40421	273	Other Research-Related	2009	101586	NIAAA	101586	#N/A
NCI	7687633	40053	PA-07-297	5K99CA127161-02	5	K99	CA	127161	2		SCHMIDT, MICHAEL K	39703	40421	Institutional Training and Education Study Section (F)[NCI-F]	8116890	4	PHARMACOLOGY	72051394	YRXVL4JYCEF5	72051394	YRXVL4JYCEF5	US	40.41872	-86.910361	1481402	PURDUE U	1811	Non_Elite	female	95	WEST LAFAYETTE	IN	SCHOOLS OF PHARMACY	47906	UNITED STATES	N	40057	40421	398	Other Research-Related	2009	139631	NCI	139631	coastal
NCI	7739205	40057	PA-07-297	1K99CA137860-01A1	1	K99	CA	137860	1	A	SCHMIDT, MICHAEL K	40057	40602	Institutional Training and Education Study Section (F)[NCI-F]	9354245	4	GENETICS	44387793	TP7EK8DZV6N5	44387793	TP7EK8DZV6N5	US	36.007766	-78.926475	2221101	DUKE U		Elite	female	98	DURHAM	NC	SCHOOLS OF MEDICINE	277054673	UNITED STATES	N	40057	40602	398	Other Research-Related	2009	98753	NCI	98753	coastal
NCI	7713661	40057	PA-07-297	1K99CA140789-01	1	K99	CA	140789	1		SCHMIDT, MICHAEL K	40057	40421	Institutional Training and Education Study Section (F)[NCI-F]	9634644	7	ANATOMY/CELL BIOLOGY	47006379	JDLVAVGYJQ21	47006379	JDLVAVGYJQ21	US	42.335672	-71.104237	3212902	HARVARD MED SCH		Elite	female	99	BOSTON	MA	SCHOOLS OF MEDICINE	21201616	UNITED STATES	N	40057	40421	398	Other Research-Related	2009	135270	NCI	135270	coastal
NICHD	7840464	40066	PA-07-297	5K99HD057553-02	5	K99	HD	57553	2		NEWCOMER, SUSAN	39706	40421	Behavioral and Social Consequences of HIV/AIDS Study Section[BSCH]	6703381	7	MISCELLANEOUS	605799469	HD1WMN6945W6	605799469	HD1WMN6945W6	US	47.660307	-122.315168	9087701	U OF WASHINGTON		Elite	female	98	SEATTLE	WA	SCHOOLS OF ARTS AND SCIENCES	981959472	UNITED STATES	N	40057	40421	864	Other Research-Related	2009	88615	NICHD	88615	coastal
NEI	7687355	40066	PA-07-297	5K99EY019072-02	5	K99	EY	19072	2		STEINMETZ, MICHAEL A	39721	40421	ZEY1-VSN(07)	6357328	7	PHYSIOLOGY	605799469	HD1WMN6945W6	605799469	HD1WMN6945W6	US	47.660307	-122.315168	9087701	U OF WASHINGTON		Elite	female	98	SEATTLE	WA	SCHOOLS OF MEDICINE	981959472	UNITED STATES	N	40057	40421	867	Other Research-Related	2009	76626	NEI	76626	coastal
NCI	7921869	40071	PA-07-297	3K99CA129205-02S1	3	K99	CA	129205	2	S	SCHMIDT, MICHAEL K	40057	40421	Institutional Training and Education Study Section (F)[NCI-F]	8799899	98	INTERNAL MEDICINE/MEDICINE	49515844	TF2CMKY1HMX9	49515844	TF2CMKY1HMX9	US	38.905206	-77.07547	2869001	GEORGETOWN U	806	Non_Elite	female	84	WASHINGTON	DC	SCHOOLS OF MEDICINE	200570001	UNITED STATES	N	40057	40421	701	Other Research-Related	2009	78487	NCI	78487	coastal
NCI	7920538	40071	PA-07-297	3K99CA129565-02S1	3	K99	CA	129565	2	S	SCHMIDT, MICHAEL K	40057	40421	Institutional Training and Education Study Section (F)[NCI-F]	8768213	7	INTERNAL MEDICINE/MEDICINE	5436803	KG76WYENL5K1	5436803	KG76WYENL5K1	US	42.050479	-87.680046	6144650	NORTHWESTERN U		Elite	female	75	CHICAGO	IL	SCHOOLS OF MEDICINE	606114579	UNITED STATES	N	40057	40421	701	Other Research-Related	2009	53162	NCI	53162	coastal
NLM	7786786	40080	PA-09-036	1K99LM010038-01A1	1	K99	LM	10038	1	A	SIM, HUA-CHUAN	40086	40450	Biomedical Informatics, Library and Data Sciences Review Committee[BLR]	8877433	5	INTERNAL MEDICINE/MEDICINE	965717143	GTNBNWXJ12D5	965717143	DWH7MSXKA2A8; GTNBNWXJ12D5	US	36.143381	-86.803365	8721001	VANDERBILT U		Non_Elite	female	95	Nashville	TN	SCHOOLS OF MEDICINE	372032408	UNITED STATES	N	40086	40450	879	Other Research-Related	2009	127764	NLM	127764	coastal
NCI	7938252	40084	PA-06-133	3K99CA131489-02S1	3	K99	CA	131489	2	S	SCHMIDT, MICHAEL K	40086	40450	Institutional Training and Education Study Section (F)[NCI-F]	8770854	5	BIOLOGY	837322494	MNS7B9CVKDN7	837322494	MNS7B9CVKDN7	US	33.753531	-84.384483	676604	GEORGIA STATE U		Non_Elite	female	90	ATLANTA	GA	SCHOOLS OF ARTS AND SCIENCES	303023999	UNITED STATES	N	40086	40450	701	Other Research-Related	2009	54001	NCI	54001	coastal
NCI	7770636	40084	PA-09-036	1K99CA142888-01	1	K99	CA	142888	1		SCHMIDT, MICHAEL K	40084	40359	Institutional Training and Education Study Section (F)[NCI-F]	8839897	4	BIOMEDICAL ENGINEERING	44387793	TP7EK8DZV6N5	44387793	TP7EK8DZV6N5	US	36.007766	-78.926475	2221101	DUKE U		Elite	female	98	DURHAM	NC	BIOMED ENGR/COL ENGR/ENGR STA	277054673	UNITED STATES	N	40084	40359	398	Other Research-Related	2009	88596	NCI	88596	coastal
NIGMS	7741206	40133	PA-07-297	5K99GM086517-02	5	K99	GM	86517	2		CARTER, ANTHONY D	39783	40512	ZGM1-BRT-9(KR)	7983054	7	Unavailable	78200995	HMSNCM57QNR5	78200995	HMSNCM57QNR5	US	47.627342	-122.331593	861001	FRED HUTCHINSON CANCER RES CTR		Elite	female	98	SEATTLE	WA	Research Institutes	981094433	UNITED STATES	N	40148	40512	859	Other Research-Related	2010	90000	NIGMS	90000	coastal
NIDCR	7743790	40135	PA-07-297	5K99DE018085-02	5	K99	DE	18085	2		FRIEDEN, LESLIE A	39814	40543	ZDE1-RK(44)	8608310	18	NONE	4514360	MKAGLD59JRL1	4514360	MKAGLD59JRL1	US	40.440909	-79.959125	2059802	U OF PITTSBURGH AT PITTSBURGH		Elite	female	93	PITTSBURGH	PA	SCHOOLS OF DENTISTRY/ORAL HYGN	152133320	UNITED STATES	N	40179	40543	121	Other Research-Related	2010	131426	NIDCR	131426	#N/A
NIDDK	7985161	40155	PA-07-297	3K99DK080981-02S1	3	K99	DK	80981	2	S	RANKIN, TRACY L	40155	40359	Kidney, Urologic and Hematologic Diseases D Study Section[DDK-D]	9060641	7	ANESTHESIOLOGY	63690705	YND4PLMC9AN7	63690705	YND4PLMC9AN7	US	33.50591	-86.799772	1288803	U OF ALABAMA AT BIRMINGHAM		Non_Elite	female	98	BIRMINGHAM	AL	SCHOOLS OF MEDICINE	352940001	UNITED STATES	N	40155	40359	701	Other Research-Related	2010	30739	NIDDK	30739	coastal
NIMH	7786569	40157	PA-09-036	1K99MH085859-01A1	1	K99	MH	85859	1	A	DESMOND, NANCY L	40179	40543	ZMH1-ERB-L(07)	6472589	12	PSYCHIATRY	73133571	GNJ7BBP73WE9	73133571	GNJ7BBP73WE9	US	42.275494	-83.743038	1506502	U OF MICHIGAN AT ANN ARBOR		Elite	female	98	ANN ARBOR	MI	SCHOOLS OF MEDICINE	481091276	UNITED STATES	N	40179	40543	281	Other Research-Related	2010	83912	NIMH	83912	coastal
NHLBI	7759516	40157	PA-07-297	5K99HL094708-02	5	K99	HL	94708	2		COMMARATO, MICHAEL	39834	40543	ZHL1-CSR-Z(O1)	6994702	7	PHARMACOLOGY	1910777	FTMTDMBR29C7	1910777	FTMTDMBR29C7	US	39.325256	-76.605131	4134401	JOHNS HOPKINS U		Elite	female	99	BALTIMORE	MD	SCHOOLS OF MEDICINE	212182680	UNITED STATES	N	40179	40543	837	Other Research-Related	2010	98004	NHLBI	98004	coastal
NIEHS	7752823	40162	PA-07-297	5K99ES016806-02	5	K99	ES	16806	2		SHREFFLER, CAROL A	39815	40543	ZES1-LKB-C(K1)	9244480	4	NONE	44387793	TP7EK8DZV6N5	44387793	TP7EK8DZV6N5	US	36.007766	-78.926475	2221101	DUKE U		Elite	female	98	DURHAM	NC	EARTH SCIENCES/RESOURCES	277054673	UNITED STATES	N	40179	40543	113	Other Research-Related	2010	87810	NIEHS	87810	coastal
NIDDK	7996198	40165	PA-07-297	3K99DK081610-02S1	3	K99	DK	81610	2	S	RANKIN, TRACY L	40167	40359	Kidney, Urologic and Hematologic Diseases D Study Section[DDK-D]	6801231	3	PHYSIOLOGY	43207562	FL6GV84CKN57	43207562	FL6GV84CKN57	US	41.310925	-72.926428	9420201	YALE U		Elite	female	98	NEW HAVEN	CT	SCHOOLS OF MEDICINE	65208327	UNITED STATES	N	40167	40359	701	Other Research-Related	2010	30989	NIDDK	30989	coastal
NIAMS	7771407	40175	PA-09-036	1K99AR057817-01	1	K99	AR	57817	1		BAKER, CARL	40179	40543	Arthritis and Musculoskeletal and Skin Diseases Special Grants Study Section[AMS]	9766610	12	BIOLOGY	71037113	LHGDNJMZ64Y1	71037113	LHGDNJMZ64Y1	US	40.763746	-73.955386	7056601	ROCKEFELLER U		Non_Elite	female	98	NEW YORK	NY	GRADUATE SCHOOLS	100656399	UNITED STATES	N	40179	40543	846	Other Research-Related	2010	90000	NIAMS	90000	coastal
NIGMS	7772503	40189	PA-09-036	1K99GM089985-01	1	K99	GM	89985	1		OKITA, RICHARD T	40189	40543	ZGM1-BRT-9(KR)	9160330	7	BIOCHEMISTRY	47006379	JDLVAVGYJQ21	47006379	JDLVAVGYJQ21	US	42.335672	-71.104237	3212902	HARVARD MED SCH		Elite	female	99	BOSTON	MA	SCHOOLS OF MEDICINE	21201616	UNITED STATES	N	40189	40543	859	Other Research-Related	2010	89980	NIGMS	89980	coastal
NIDCR	7707393	40211	PA-07-297	1K99DE019853-01	1	K99	DE	19853	1		FRIEDEN, LESLIE A	40211	40574	NIDCR Special Grants Review Committee[DSR]	8403350	18	SURGERY	9214214	HJD6G4D6TJY5	9214214	HJD6G4D6TJY5	US	37.426852	-122.17047	8046501	STANFORD U		Elite	female	98	STANFORD	CA	SCHOOLS OF MEDICINE	943052004	UNITED STATES	N	40211	40574	121	Other Research-Related	2010	93337	NIDCR	93337	coastal
NIA	7766901	40221	PA-07-297	5K99AG033050-02	5	K99	AG	33050	2		FINKELSTEIN, DAVID B	39859	40421	Biological Aging Study Section[NIA-B]	7984733	7	Unavailable	78200995	HMSNCM57QNR5	78200995	HMSNCM57QNR5	US	47.627342	-122.331593	861001	FRED HUTCHINSON CANCER RES CTR		Elite	female	92	SEATTLE	WA	Research Institutes	981094433	UNITED STATES	N	40224	40421	866	Other Research-Related	2010	90000	NIA	90000	coastal
NHLBI	7771639	40231	PA-07-297	5K99HL087924-02	5	K99	HL	87924	2		MONDORO, TRACI	39873	40783	ZHL1-CSR-Z(O1)	8652094	3	INTERNAL MEDICINE/MEDICINE	57588857	E1KJM4T54MK6	57588857	E1KJM4T54MK6	US	38.215024	-85.760145	4679701	U OF LOUISVILLE		Non_Elite	female	98	LOUISVILLE	KY	SCHOOLS OF MEDICINE	402920001	UNITED STATES	N	40238	40783	837	Other Research-Related	2010	129060	NHLBI	129060	coastal
NIEHS	7779489	40231	PA-07-297	5K99ES016758-02	5	K99	ES	16758	2		SHREFFLER, CAROL A	39873	40967	ZES1-LKB-C(K1)	11088279	18	PHARMACOLOGY	4514360	MKAGLD59JRL1	4514360	MKAGLD59JRL1	US	40.440909	-79.959125	2059802	U OF PITTSBURGH AT PITTSBURGH		Elite	female	53	PITTSBURGH	PA	SCHOOLS OF MEDICINE	152133320	UNITED STATES	N	40238	40967	113	Other Research-Related	2010	83280	NIEHS	83280	coastal
NHLBI	7770199	40232	PA-09-036	1K99HL098277-01	1	K99	HL	98277	1		COMMARATO, MICHAEL	40238	40602	ZHL1-CSR-Z(O2)	9743728	12	BIOCHEMISTRY	94878337	KMH5K9V7S518	94878337	KMH5K9V7S518	US	37.767442	-122.413937	577508	U OF CALIFORNIA SAN FRANCISCO		Elite	female	98	SAN FRANCISCO	CA	SCHOOLS OF MEDICINE	941432510	UNITED STATES	N	40238	40602	837	Other Research-Related	2010	102598	NHLBI	102598	coastal
NINR	7805550	40232	PA-07-297	5K99NR011173-02	5	K99	NR	11173	2		HUSS, KAREN	39919	40633	Nursing Science Review Committee[NRRC(43)]	6770700	3	OTHER HEALTH PROFESSIONS	42250712	GM1XX56LEP58	42250712	GM1XX56LEP58	US	39.953462	-75.193983	6463801	U OF PENNSYLVANIA		Elite	female	98	PHILADELPHIA	PA	SCHOOLS OF NURSING	191046205	UNITED STATES	N	40269	40633	361	Other Research-Related	2010	90000	NINR	90000	coastal
NIDA	7784453	40246	PA-07-297	5K99DA025785-02	5	K99	DA	25785	2		AVILA, ALBERT	39904	40999	Career Development Education and Training Study Section[NIDA-K]	9334165	49	Unavailable	781613492	PHZJFZ32NKH4	781613492	PHZJFZ32NKH4	US	32.903062	-117.243592	7375802	SCRIPPS RES INST THE		Non_Elite	female	100	LA JOLLA	CA	Other Domestic Non-Profits	920371000	UNITED STATES	N	40269	40999	279	Other Research-Related	2010	93164	NIDA	93164	#N/A
NHLBI	7796784	40252	PA-07-297	5K99HL094767-02	5	K99	HL	94767	2		PAPANICOLAOU, GEORGE	39904	40762	ZHL1-CSR-Z(O1)	8468286	18	INTERNAL MEDICINE/MEDICINE	4514360	MKAGLD59JRL1	4514360	MKAGLD59JRL1	US	40.440909	-79.959125	2059802	U OF PITTSBURGH AT PITTSBURGH		Elite	female	98	PITTSBURGH	PA	SCHOOLS OF MEDICINE	152133320	UNITED STATES	N	40269	40762	837	Other Research-Related	2010	84670	NHLBI	84670	#N/A
NIDA	7805512	40255	PA-07-297	5K99DA024762-02	5	K99	DA	24762	2		POLLOCK, JONATHAN D	39913	40633	Career Development Education and Training Study Section[NIDA-K]	8387609	7	PSYCHIATRY	605799469	HD1WMN6945W6	605799469	HD1WMN6945W6	US	47.660307	-122.315168	9087701	U OF WASHINGTON		Elite	female	98	SEATTLE	WA	SCHOOLS OF MEDICINE	981959472	UNITED STATES	N	40269	40633	277	Other Research-Related	2010	90000	NIDA	90000	coastal
NIGMS	7871584	40255	PA-09-036	1K99GM092934-01	1	K99	GM	92934	1		OKITA, RICHARD T	40269	40633	ZGM1-BRT-9(KR)	9949186	18	PATHOLOGY	9214214	HJD6G4D6TJY5	9214214	HJD6G4D6TJY5	US	37.426852	-122.17047	8046501	STANFORD U		Elite	female	98	STANFORD	CA	SCHOOLS OF MEDICINE	943052004	UNITED STATES	N	40269	40633	859	Other Research-Related	2010	81971	NIGMS	81971	#N/A
NIMH	7797625	40270	PA-07-297	5K99MH085944-02	5	K99	MH	85944	2		DESMOND, NANCY L	39904	40359	ZMH1-ERB-L(01)	9501051	7	MISCELLANEOUS	1425594	E2NYLCDML6V1	1425594	E2NYLCDML6V1	US	42.359128	-71.093339	4911501	MASSACHUSETTS INST OF TECHNOLOGY		Elite	female	74	CAMBRIDGE	MA	ORGANIZED RESEARCH UNITS	21421029	UNITED STATES	N	40269	40359	281	Other Research-Related	2010	86435	NIMH	86435	coastal
NINDS	7873506	40270	PA-09-036	1K99NS069799-01	1	K99	NS	69799	1		MAMOUNAS, LAURA	40269	40602	NST-2 Study Section [NST-2]	9528031	7	NEUROSCIENCES	1910777	FTMTDMBR29C7	1910777	FTMTDMBR29C7	US	39.325256	-76.605131	4134401	JOHNS HOPKINS U		Elite	female	90	BALTIMORE	MD	SCHOOLS OF MEDICINE	212182680	UNITED STATES	N	40269	40602	853	Other Research-Related	2010	90000	NINDS	90000	coastal
NIGMS	7784420	40275		5K99GM087810-02	5	K99	GM	87810	2		FLICKER, PAULA F	39904	40421	ZGM1-BRT-9(KR)	7358333	23	CHEMISTRY	872612445	G56PUALJ3KT5	872612445	CCV3WG2JG248; D4H1NV4APKP3; ELS2M3C6V2S5; EQA8NBEN9WD5; FFAZGE9NH3M8; G56PUALJ3KT5; K6JRCJJXFET1; M8FBSLHASMT3; P4LRVQT1H4K5; PJUVN8AT5416; RT1JPM9UMGM5; ZBMGUAZYFGC4; ZMP8BDLJTUW9	US	42.438	-76.4625	1514802	CORNELL U		Elite	female	98	ITHACA	NY	SCHOOLS OF ARTS AND SCIENCES	148502820	UNITED STATES	N	40269	40421	859	Other Research-Related	2010	37500	NIGMS	37500	coastal
NINDS	7821250	40275	PA-07-297	5K99NS065183-02	5	K99	NS	65183	2		MAMOUNAS, LAURA	39934	40543	NST-2 Study Section [NST-2]	9497459	5	MICROBIOLOGY/IMMUN/VIROLOGY	65391526	JJG6HU8PA4S5	65391526	JJG6HU8PA4S5	US	38.050527	-78.500531	1526402	U OF VIRGINIA		Non_Elite	female	75	CHARLOTTESVILLE	VA	SCHOOLS OF MEDICINE	229044195	UNITED STATES	N	40299	40543	853	Other Research-Related	2010	89999	NINDS	89999	coastal
NIDDK	7777376	40277	PA-07-297	5K99DK083333-02	5	K99	DK	83333	2		LINDER, BARBARA	39965	40694	Diabetes, Endocrinology and Metabolic Diseases B Study Section[DDK-B]	8965686	7	NUTRITION	63690705	YND4PLMC9AN7	63690705	YND4PLMC9AN7	US	33.50591	-86.799772	1288803	U OF ALABAMA AT BIRMINGHAM		Non_Elite	female	98	BIRMINGHAM	AL	SCH ALLIED HEALTH PROFESSIONS	352940001	UNITED STATES	N	40330	40694	847	Other Research-Related	2010	79419	NIDDK	79419	coastal
NIGMS	7786975	40280	PA-07-297	5K99GM087306-02	5	K99	GM	87306	2		OKITA, RICHARD T	39904	40390	ZGM1-BRT-9(KR)	9493206	12	PHARMACOLOGY	94878337	KMH5K9V7S518	94878337	KMH5K9V7S518	US	37.767442	-122.413937	577508	U OF CALIFORNIA SAN FRANCISCO		Elite	female	99	SAN FRANCISCO	CA	SCHOOLS OF MEDICINE	941432510	UNITED STATES	N	40269	40390	859	Other Research-Related	2010	30000	NIGMS	30000	coastal
NIDCR	7867899	40288	PA-07-297	5K99DE019486-02	5	K99	DE	19486	2		FRIEDEN, LESLIE A	39975	40539	NIDCR Special Grants Review Committee[DSR]	9283568	12	PEDIATRICS	94878337	KMH5K9V7S518	94878337	KMH5K9V7S518	US	37.767442	-122.413937	577508	U OF CALIFORNIA SAN FRANCISCO		Elite	female	88	SAN FRANCISCO	CA	SCHOOLS OF MEDICINE	941432510	UNITED STATES	N	40330	40539	121	Other Research-Related	2010	87183	NIDCR	87183	coastal
NIDA	7786273	40289	PA-07-297	5K99DA025153-02	5	K99	DA	25153	2		BJORK, JAMES M	39934	40435	Career Development Education and Training Study Section[NIDA-K]	8720039	3	NEUROLOGY	16060860	YXJGGNC5J269	16060860	YXJGGNC5J269	US	39.026584	-94.636347	1484303	U OF KANSAS MED CTR		Non_Elite	female	98	KANSAS CITY	KS	SCHOOLS OF MEDICINE	661608500	UNITED STATES	N	40299	40435	279	Other Research-Related	2010	80995	NIDA	80995	coastal
NIEHS	7822803	40295	PA-07-297	5K99ES017051-02	5	K99	ES	17051	2		SHREFFLER, CAROL A	39934	40663	ZES1-JAB-C(KR)	9369814	13	PUBLIC HEALTH & PREV MEDICINE	621889815	QHF5ZZ114M72	621889815	QHF5ZZ114M72	US	40.8415	-73.9414	1833205	COLUMBIA U HEALTH SCI		Elite	female	98	NEW YORK	NY	SCHOOLS OF PUBLIC HEALTH	100323725	UNITED STATES	N	40299	40663	113	Other Research-Related	2010	65906	NIEHS	65906	coastal
NIAID	7772948	40297	PA-09-036	1K99AI085107-01	1	K99	AI	85107	1		MCGUGAN, GLEN C	40299	40545	Microbiology and Infectious Diseases B Research Study Section[MID-B]	6439809	27	NONE	9584210	U2JMKHNS5TG4	9584210	U2JMKHNS5TG4	US	34.134332	-118.12652	1073501	CALIFORNIA INST OF TECHNOLOGY		Elite	female	99	PASADENA	CA	SCHOOLS OF ARTS AND SCIENCES	911250001	UNITED STATES	N	40299	40545	855	Other Research-Related	2010	59629	NIAID	59629	coastal
NIMH	7849730	40302	PA-07-297	5K99MH085004-02	5	K99	MH	85004	2		DESMOND, NANCY L	39965	40694	ZMH1-ERB-H(09)	7372865	7	Unavailable	30811269	QN6MS4VN7BD1	30811269	QN6MS4VN7BD1	US	42.336107	-71.107481	1080401	BRIGHAM AND WOMENS HOSP		Elite	female	91	BOSTON	MA	Independent Hospitals	21156110	UNITED STATES	N	40330	40694	242	Other Research-Related	2010	89367	NIMH	89367	#N/A
NIMH	7871247	40305	PA-09-036	1K99MH090238-01	1	K99	MH	90238	1		DESMOND, NANCY L	40308	40999	ZMH1-ERB-L(01)	9886362	33	NEUROLOGY	92530369	RN64EPNH8JC6	92530369	RN64EPNH8JC6	US	34.070199	-118.45102	577505	U OF CALIFORNIA LOS ANGELES		Elite	female	99	LOS ANGELES	CA	SCHOOLS OF MEDICINE	900952000	UNITED STATES	N	40308	40633	281	Other Research-Related	2010	90000	NIMH	90000	coastal
NIA	7778819	40309		5K99AG030677-02	5	K99	AG	30677	2		JOSEPH, LYNDON	39965	40694	Clinical Aging Study Section[NIA-C]	8802257	7	Unavailable	71723621	C1CPANL3EWK4	71723621	C1CPANL3EWK4	US	42.33982	-71.10568	758101	BETH ISRAEL DEACONESS MED CTR		Elite	female	98	BOSTON	MA	Independent Hospitals	22155400	UNITED STATES	N	40330	40694	866	Other Research-Related	2010	90000	NIA	90000	#N/A
NIMH	7816660	40310		5K99MH083887-02	5	K99	MH	83887	2		HILL, LAUREN D	39934	40786	ZMH1-ERB-L(01)	6434939	7	Unavailable	73824922	RTHJSE4WVWB7	73824922	RTHJSE4WVWB7	US	42.330928	-71.109909	957301	JUDGE BAKER CHILDRENS CTR		Non_Elite	female	98	BOSTON	MA	Other Domestic Non-Profits	21203225	UNITED STATES	N	40310	40786	281	Other Research-Related	2010	86079	NIMH	86079	coastal
NIAID	7989573	40312	PA-09-036	1K99AI087963-01A1	1	K99	AI	87963	1	A	PROGRAIS, LAWRENCE J	40313	40663	Microbiology and Infectious Diseases Advisory Committee[MID]	9957208	3	MICROBIOLOGY/IMMUN/VIROLOGY	43207562	FL6GV84CKN57	43207562	FL6GV84CKN57	US	41.310925	-72.926428	9420201	YALE U		Elite	female	73	NEW HAVEN	CT	SCHOOLS OF MEDICINE	65208327	UNITED STATES	N	40313	40663	855	Other Research-Related	2010	94770	NIAID	94770	coastal
NIDA	7822924	40315	PA-07-297	5K99DA025181-02	5	K99	DA	25181	2		KAUTZ, MARY A	39934	40663	Career Development Education and Training Study Section[NIDA-K]	9259063	9	NONE	800772139	S3GMKS8ELA16	800772139	S3GMKS8ELA16	US	29.706319	-95.397195	578407	U OF TX MD ANDERSON CAN CTR		Non_Elite	female	98	HOUSTON	TX	OVERALL MEDICAL	770304009	UNITED STATES	N	40299	40663	279	Other Research-Related	2010	154848	NIDA	154848	coastal
NIGMS	7883217	40324	PA-07-297	5K99GM088408-02	5	K99	GM	88408	2		OKITA, RICHARD T	39995	40786	ZGM1-BRT-9(KR)	9628209	12	PATHOLOGY	121911077	M5SZJ6VHUHN8	121911077	M5SZJ6VHUHN8	US	40.669895	-73.974354	5998304	NEW YORK U SCH OF MED		Elite	female	97	NEW YORK	NY	SCHOOLS OF MEDICINE	10016	UNITED STATES	N	40360	40786	859	Other Research-Related	2010	90000	NIGMS	90000	coastal
NIAAA	7849094	40331	PA-07-297	5K99AA017774-02	5	K99	AA	17774	2		GENTRY, THOMAS	39965	40694	Biomedical Research Study Section[AA-1]	9259770	37	INTERNAL MEDICINE/MEDICINE	72933393	G88KLJR3KYT5	72933393	G88KLJR3KYT5	US	34.017282	-118.281254	7636101	U OF SOUTHERN CALIFORNIA		Non_Elite	female	88	Los Angeles	CA	SCHOOLS OF MEDICINE	900894304	UNITED STATES	N	40330	40694	273	Other Research-Related	2010	147998	NIAAA	147998	#N/A
NIAID	7838566	40332	PA-09-036	1K99AI087368-01	1	K99	AI	87368	1		SHARMA, OPENDRA K	40360	40724	Acquired Immunodeficiency Syndrome Research Study Section[AIDS]	9785131	12	Unavailable	786658872		786658872		US	40.739211	-73.977162	2455201	AARON DIAMOND AIDS RES CTR		Non_Elite	female	96	NEW YORK	NY	Research Institutes	100169102	UNITED STATES	N	40360	40724	855	Other Research-Related	2010	92700	NIAID	92700	coastal
NIBIB	7770883	40337	PA-07-297	5K99EB007676-02	5	K99	EB	7676	2		ERIM, ZEYNEP	39965	40694	ZEB1-OSR-E(O1)S	8797196	18	RADIATION-DIAGNOSTIC/ONCOLOGY	9214214	HJD6G4D6TJY5	9214214	HJD6G4D6TJY5	US	37.426852	-122.17047	8046501	STANFORD U		Elite	female	100	STANFORD	CA	SCHOOLS OF MEDICINE	943052004	UNITED STATES	N	40330	40694	286	Other Research-Related	2010	89574	NIBIB	89574	coastal
NICHD	7872967	40339	PA-07-297	5K99HD057522-02	5	K99	HD	57522	2		FREUND, LISA S	39995	41455	Biobehavioral and Behavioral Sciences Study Section[CHHD-H]	8902323	7	MISCELLANEOUS	1425594	E2NYLCDML6V1	1425594	E2NYLCDML6V1	US	42.359128	-71.093339	4911501	MASSACHUSETTS INST OF TECHNOLOGY		Elite	female	98	CAMBRIDGE	MA	ORGANIZED RESEARCH UNITS	21421029	UNITED STATES	N	40360	41455	865	Other Research-Related	2010	81000	NICHD	81000	coastal
NINDS	7873076	40339	PA-09-036	1K99NS069798-01	1	K99	NS	69798	1		SUTHERLAND, MARGARET L	40344	40694	NST-2 Study Section [NST-2]	6576099	3	NEUROSCIENCES	96997515	NPSNT86JKN51	96997515	NPSNT86JKN51	US	45.49882	-122.685647	6297007	OREGON HEALTH & SCI U		Non_Elite	female	92	PORTLAND	OR	PRIMATE CENTERS	972393098	UNITED STATES	N	40344	40694	853	Other Research-Related	2010	89942	NINDS	89942	#N/A
NCI	7891307	40339	PA-07-297	5K99CA139050-02	5	K99	CA	139050	2		SCHMIDT, MICHAEL K	40004	40785	Institutional Training and Education Study Section (F)[NCI-F]	8230129	7	RADIATION-DIAGNOSTIC/ONCOLOGY	63690705	YND4PLMC9AN7	63690705	YND4PLMC9AN7	US	33.50591	-86.799772	1288803	U OF ALABAMA AT BIRMINGHAM		Non_Elite	female	98	BIRMINGHAM	AL	SCHOOLS OF MEDICINE	352940001	UNITED STATES	N	40360	40785	398	Other Research-Related	2010	90000	NCI	90000	coastal
NIGMS	8079363	40340	PA-07-297	3K99GM084306-02S1	3	K99	GM	84306	2	S	CARTER, ANTHONY D	40360	40724	ZGM1-BRT-9(KR)	2048092	7	Unavailable	120989983	C186U32QSBR9	120989983	C186U32QSBR9	US	42.363037	-71.08963	1742101	WHITEHEAD INST FOR BIOMED RES		Elite	female	98	CAMBRIDGE	MA	Research Institutes	21421025	UNITED STATES	N	40360	40724	701	Other Research-Related	2010	90000	NIGMS	90000	#N/A
NCI	7893188	40343	PA-07-297	5K99CA126978-02	5	K99	CA	126978	2		SCHMIDT, MICHAEL K	40008	40724	Institutional Training and Education Study Section (F)[NCI-F]	8663402	5	INTERNAL MEDICINE/MEDICINE	965717143	GTNBNWXJ12D5	965717143	DWH7MSXKA2A8; GTNBNWXJ12D5	US	36.143381	-86.803365	8721001	VANDERBILT U		Non_Elite	female	98	Nashville	TN	SCHOOLS OF MEDICINE	372032408	UNITED STATES	N	40360	40724	398	Other Research-Related	2010	135931	NCI	135931	coastal
NIMH	7880118	40343	PA-07-297	5K99MH085099-02	5	K99	MH	85099	2		CHURCHILL, JAMES D	39995	40724	ZMH1-ERB-L(03)	9363170	3	PSYCHIATRY	47120084	TX2DAGQPENZ5	47120084	TX2DAGQPENZ5	US	38.543366	-121.72946	577503	U OF CALIFORNIA AT DAVIS		Non_Elite	female	98	DAVIS	CA	SCHOOLS OF MEDICINE	956186153	UNITED STATES	N	40360	40724	242	Other Research-Related	2010	90000	NIMH	90000	coastal
NCI	7883638	40345	PA-07-297	5K99CA138905-02	5	K99	CA	138905	2		LEI, MING	39995	41152	Institutional Training and Education Study Section (F)[NCI-F]	9497462	5	MICROBIOLOGY/IMMUN/VIROLOGY	65391526	JJG6HU8PA4S5	65391526	JJG6HU8PA4S5	US	38.050527	-78.500531	1526402	U OF VIRGINIA		Non_Elite	female	98	CHARLOTTESVILLE	VA	SCHOOLS OF MEDICINE	229044195	UNITED STATES	N	40360	41152	398	Other Research-Related	2010	99911	NCI	99911	coastal
NCI	7881470	40346	PA-07-297	5K99CA134743-02	5	K99	CA	134743	2		SCHMIDT, MICHAEL K	39995	40907	Institutional Training and Education Study Section (F)[NCI-F]	9197562	7	Unavailable	76580745	DPMGH9MG1X67	76580745	DPMGH9MG1X67	US	42.337593	-71.108279	1464901	DANA FARBER CANCER INST		Elite	female	52	BOSTON	MA	Independent Hospitals	22155450	UNITED STATES	N	40360	40907	398	Other Research-Related	2010	140940	NCI	140940	coastal
NIDCD	7884321	40347	PA-07-297	5K99DC010198-02	5	K99	DC	10198	2		SKLARE, DAN	39996	40724	Communication Disorders Review Committee[CDRC]	9106327	3	NEUROSCIENCES	96997515	NPSNT86JKN51	96997515	NPSNT86JKN51	US	45.49882	-122.685647	6297007	OREGON HEALTH & SCI U		Non_Elite	female	57	PORTLAND	OR	OVERALL MEDICAL	972393098	UNITED STATES	N	40360	40724	173	Other Research-Related	2010	89200	NIDCD	89200	coastal
NCI	7893182	40351	PA-07-297	5K99CA138572-02	5	K99	CA	138572	2		SCHMIDT, MICHAEL K	40008	40421	Institutional Training and Education Study Section (F)[NCI-F]	9385371	7	Unavailable	120989983	C186U32QSBR9	120989983	C186U32QSBR9	US	42.363037	-71.08963	1742101	WHITEHEAD INST FOR BIOMED RES		Elite	female	51	CAMBRIDGE	MA	Research Institutes	21421025	UNITED STATES	N	40360	40421	398	Other Research-Related	2010	44637	NCI	44637	coastal
NHLBI	7821322	40352	PA-07-297	5K99HL090706-02	5	K99	HL	90706	2		WERNER, ELLEN	39995	41090	ZHL1-CSR-Z(O1)	6195405	12	PATHOLOGY	94878337	KMH5K9V7S518	94878337	KMH5K9V7S518	US	37.767442	-122.413937	577508	U OF CALIFORNIA SAN FRANCISCO		Elite	female	98	SAN FRANCISCO	CA	SCHOOLS OF MEDICINE	941432510	UNITED STATES	N	40360	41090	837	Other Research-Related	2010	90000	NHLBI	90000	#N/A
NHLBI	7924105	40352	PA-07-297	5K99HL097155-02	5	K99	HL	97155	2		ROLTSCH, MARK	39995	40724	ZHL1-CSR-Z(M3)	6755809	18	SURGERY	4514360	MKAGLD59JRL1	4514360	MKAGLD59JRL1	US	40.440909	-79.959125	2059802	U OF PITTSBURGH AT PITTSBURGH		Elite	female	56	PITTSBURGH	PA	SCHOOLS OF MEDICINE	152133320	UNITED STATES	N	40360	40724	837	Other Research-Related	2010	86886	NHLBI	86886	coastal
NIMH	7896786	40353	PA-07-297	5K99MH085060-02	5	K99	MH	85060	2		CHAVEZ, MARK	40026	40769	ZMH1-ERB-L(03)	7799721	8	PSYCHOLOGY	808008122	CGCDJ24JJLZ1	808008122	CGCDJ24JJLZ1	US	42.313703	-71.062976	850902	U OF MASSACHUSETTS BOSTON		Non_Elite	female	98	BOSTON	MA	SCHOOLS OF ARTS AND SCIENCES	21253300	UNITED STATES	N	40391	40769	281	Other Research-Related	2010	89813	NIMH	89813	#N/A
NHLBI	7923980	40357	PA-07-297	5K99HL091116-02	5	K99	HL	91116	2		COMMARATO, MICHAEL	40057	41121	ZHL1-CSR-Z(O1)	8840795	4	Unavailable	65937856	ELGEEPUTTZM4	65937856	ELGEEPUTTZM4	US	40.741606	-73.643311	5618301	NYU WINTHROP HOSP		Elite	female	92	MINEOLA	NY	Independent Hospitals	115013957	UNITED STATES	N	40391	41121	837	Other Research-Related	2010	93009	NHLBI	93009	coastal
NHLBI	7924042	40357	PA-07-297	5K99HL097153-02	5	K99	HL	97153	2		COMMARATO, MICHAEL	40057	40574	ZHL1-CSR-Z(M3)	9632871	12	INTERNAL MEDICINE/MEDICINE	966668691	N4WWJC8T2593	809593387; 966668691	JJJNQAJY5RN6; N4WWJC8T2593	US	33.470962	-81.991405	676605	AUGUSTA U		Non_Elite	female	93	AUGUSTA	GA	SCHOOLS OF MEDICINE	309120004	UNITED STATES	N	40391	40574	837	Other Research-Related	2010	86520	NHLBI	86520	coastal
NIGMS	7886807	40373	PA-07-297	5K99GM088413-02	5	K99	GM	88413	2		CARTER, ANTHONY D	40026	40724	ZGM1-BRT-9(KR)	6863009	13	GENETICS	621889815	QHF5ZZ114M72	621889815	QHF5ZZ114M72	US	40.8415	-73.9414	1833205	COLUMBIA U HEALTH SCI		Elite	female	65	NEW YORK	NY	SCHOOLS OF MEDICINE	100323725	UNITED STATES	N	40391	40724	859	Other Research-Related	2010	90000	NIGMS	90000	coastal
NIAMS	7905720	40375	PA-07-297	5K99AR057501-02	5	K99	AR	57501	2		BAKER, CARL	40026	40755	Arthritis and Musculoskeletal and Skin Diseases Special Grants Study Section[AMS]	8204617	12	BIOLOGY	71037113	LHGDNJMZ64Y1	71037113	LHGDNJMZ64Y1	US	40.763746	-73.955386	7056601	ROCKEFELLER U		Non_Elite	female	96	NEW YORK	NY	GRADUATE SCHOOLS	100656399	UNITED STATES	N	40391	40755	846	Other Research-Related	2010	95202	NIAMS	95202	coastal
NIMH	7905046	40378	PA-07-297	5K99MH086720-02	5	K99	MH	86720	2		DESMOND, NANCY L	40026	40755	ZMH1-ERB-L(03)	8201874	18	BIOLOGY	9214214	HJD6G4D6TJY5	9214214	HJD6G4D6TJY5	US	37.426852	-122.17047	8046501	STANFORD U		Elite	female	93	STANFORD	CA	SCHOOLS OF ARTS AND SCIENCES	943052004	UNITED STATES	N	40391	40755	281	Other Research-Related	2010	87924	NIMH	87924	coastal
NEI	7952772	40385	PA-09-036	1K99EY020844-01	1	K99	EY	20844	1		STEINMETZ, MICHAEL A	40391	40755	ZEY1-VSN(10)	10212415	7	BIOLOGY	47006379	JDLVAVGYJQ21	47006379	JDLVAVGYJQ21	US	42.335672	-71.104237	3212902	HARVARD MED SCH		Elite	female	98	BOSTON	MA	SCHOOLS OF MEDICINE	21201616	UNITED STATES	N	40391	40755	867	Other Research-Related	2010	87395	NEI	87395	coastal
NIMH	7877710	40386	PA-07-297	5K99MH083945-02	5	K99	MH	83945	2		DESMOND, NANCY L	39984	40755	ZMH1-ERB-L(01)	6916694	3	PSYCHIATRY	47120084	TX2DAGQPENZ5	47120084	TX2DAGQPENZ5	US	38.543366	-121.72946	577503	U OF CALIFORNIA AT DAVIS		Non_Elite	female	98	DAVIS	CA	SCHOOLS OF MEDICINE	956186153	UNITED STATES	N	40391	40755	281	Other Research-Related	2010	87056	NIMH	87056	#N/A
NIBIB	7900484	40386	PA-07-297	5K99EB009105-02	5	K99	EB	9105	2		ERIM, ZEYNEP	40026	40421	ZEB1-OSR-E(M1)S	9346940	49	Unavailable	781613492	PHZJFZ32NKH4	781613492	PHZJFZ32NKH4	US	32.903062	-117.243592	7375802	SCRIPPS RES INST THE		Non_Elite	female	98	LA JOLLA	CA	Other Domestic Non-Profits	920371000	UNITED STATES	N	40391	40421	286	Other Research-Related	2010	7425	NIBIB	7425	coastal
NIMH	7893861	40387	PA-07-297	5K99MH086756-02	5	K99	MH	86756	2		DESMOND, NANCY L	40009	40680	ZMH1-ERB-L(03)	9629983	3	Unavailable	110565913	C5LHMPRJ9J19	110565913	C5LHMPRJ9J19	US	40.775574	-73.703024	4155008	FEINSTEIN INST FOR MED RES		Non_Elite	female	98	MANHASSET	NY	Research Institutes	110303816	UNITED STATES	N	40360	40680	281	Other Research-Related	2010	78192	NIMH	78192	#N/A
NINR	7941697	40388	PA-09-036	5K99NR011054-02	5	K99	NR	11054	2		HUSS, KAREN	40085	40755	Nursing Science Review Committee[NRRC(45)]	7893133	4	OTHER HEALTH PROFESSIONS	44387793	TP7EK8DZV6N5	44387793	TP7EK8DZV6N5	US	36.007766	-78.926475	2221101	DUKE U		Elite	female	98	DURHAM	NC	SCHOOLS OF NURSING	277054673	UNITED STATES	N	40391	40755	361	Other Research-Related	2010	86457	NINR	86457	coastal
NCI	7908811	40388	PA-07-297	5K99CA132784-02	5	K99	CA	132784	2		SCHMIDT, MICHAEL K	40035	40755	Institutional Training and Education Study Section (F)[NCI-F]	8502481	4	PATHOLOGY	153890272	SZPJL5ZRCLF4	153890272	SZPJL5ZRCLF4	US	38.948231	-92.327335	578002	U OF MISSOURI COLUMBIA		Non_Elite	female	97	COLUMBIA	MO	SCHOOLS OF MEDICINE	652110001	UNITED STATES	N	40391	40755	398	Other Research-Related	2010	115638	NCI	115638	coastal
NICHD	7925689	40393	PA-07-297	5K99HD061657-02	5	K99	HD	61657	2		TAYMANS, SUSAN	40057	40908	Reproduction, Andrology, and Gynecology Study Section[CHHD-R]	8071524	3	BIOLOGY	42250712	GM1XX56LEP58	42250712	GM1XX56LEP58	US	39.953462	-75.193983	6463801	U OF PENNSYLVANIA		Elite	female	96	PHILADELPHIA	PA	SCHOOLS OF ARTS AND SCIENCES	191046205	UNITED STATES	N	40391	40908	865	Other Research-Related	2010	81972	NICHD	81972	coastal
NICHD	7926911	40394	PA-07-297	5K99HD055036-02	5	K99	HD	55036	2		ESPOSITO, LAYLA E	40066	40465	ZHD1-DSR-M(HB)	8630353	6	PEDIATRICS	41096314	MW8JHK6ZYEX8	41096314	MW8JHK6ZYEX8	US	39.745098	-104.837605	1199905	U OF COLORADO DENVER		Non_Elite	female	98	Aurora	CO	SCHOOLS OF MEDICINE	800452570	UNITED STATES	N	40422	40465	865	Other Research-Related	2010	89819	NICHD	89819	coastal
NEI	7903900	40395	PA-07-297	5K99EY018683-02	5	K99	EY	18683	2		STEINMETZ, MICHAEL A	40026	40694	ZEY1-VSN(03)	8873557	3	OPHTHALMOLOGY	47120084	TX2DAGQPENZ5	47120084	TX2DAGQPENZ5	US	38.543366	-121.72946	577503	U OF CALIFORNIA AT DAVIS		Non_Elite	female	52	DAVIS	CA	SCHOOLS OF MEDICINE	956186153	UNITED STATES	N	40391	40694	867	Other Research-Related	2010	90000	NEI	90000	#N/A
NCI	7923076	40395	PA-07-297	5K99CA134750-02	5	K99	CA	134750	2		SCHMIDT, MICHAEL K	40057	41152	Institutional Training and Education Study Section (F)[NCI-F]	9213323	1	INTERNAL MEDICINE/MEDICINE	5421136	ZUE9HKT2CLC9	5421136	ZUE9HKT2CLC9	US	41.789554	-87.601172	1413601	U OF CHICAGO		Elite	female	80	CHICAGO	IL	SCHOOLS OF MEDICINE	606372612	UNITED STATES	N	40422	41152	398	Other Research-Related	2010	111389	NCI	111389	coastal
NINDS	7903362	40395	PA-07-297	5K99NS065974-02	5	K99	NS	65974	2		FOUNTAIN, JANE W	40026	40816	NST-2 Study Section [NST-2]	2084889	49	Unavailable	78731668	NNJ6BMBTFGN5	78731668	NNJ6BMBTFGN5	US	32.8863	-117.243929	7210001	SALK INST FOR BIOLOGICAL STUDIES		Non_Elite	female	95	La Jolla	CA	Research Institutes	920371002	UNITED STATES	N	40391	40816	853	Other Research-Related	2010	85335	NINDS	85335	coastal
NHLBI	7920036	40396	PA-07-297	5K99HL094535-02	5	K99	HL	94535	2		PAPANICOLAOU, GEORGE	40057	40755	ZHL1-CSR-Z(M3)	9369002	12	BIOSTATISTICS & OTHER MATH SCI	73133571	GNJ7BBP73WE9	73133571	GNJ7BBP73WE9	US	42.275494	-83.743038	1506502	U OF MICHIGAN AT ANN ARBOR		Elite	female	91	ANN ARBOR	MI	SCHOOLS OF PUBLIC HEALTH	481091276	UNITED STATES	N	40391	40755	837	Other Research-Related	2010	90000	NHLBI	90000	coastal
NHLBI	7989344	40399	PA-09-036	1K99HL098342-01A1	1	K99	HL	98342	1	A	ROTHGEB, ANN E	40404	40800	ZHL1-CSR-Z(M2)	9752499	2	PHYSIOLOGY	41027822	EB8ASJBCFER9	41027822	EB8ASJBCFER9	US	43.711386	-72.270611	2021601	DARTMOUTH COLL	628	Elite	female	98	HANOVER	NH	SCHOOLS OF MEDICINE	37551421	UNITED STATES	N	40404	40800	837	Other Research-Related	2010	111067	NHLBI	111067	#N/A
NIA	7939738	40399	PA-09-036	5K99AG034989-02	5	K99	AG	34989	2		WISE, BRADLEY C	40086	40602	Biological Aging Study Section[NIA-B]	11345564	7	BIOCHEMISTRY	604483045	FBYMGMHW4X95	604483045	FBYMGMHW4X95	US	42.33639	-71.07097	894901	BOSTON U MED CAMPUS		Non_Elite	female	100	BOSTON	MA	SCHOOLS OF MEDICINE	21182340	UNITED STATES	N	40422	40602	866	Other Research-Related	2010	86267	NIA	86267	#N/A
NIA	7939860	40399	PA-09-036	5K99AG033670-02	5	K99	AG	33670	2		REFOLO, LORENZO	40086	40786	Basic Neuroscience of Aging Study Section[NIA-N]	9446822	8	Unavailable	73130411	FLJ7DQKLL226	73130411	FLJ7DQKLL226	US	42.363198	-71.068772	4907701	MASSACHUSETTS GENERAL HOSP		Elite	female	94	BOSTON	MA	Independent Hospitals	21142621	UNITED STATES	N	40422	40786	866	Other Research-Related	2010	88763	NIA	88763	coastal
NIA	7939873	40401	PA-09-036	5K99AG033687-02	5	K99	AG	33687	2		WISE, BRADLEY C	40086	40786	Basic Neuroscience of Aging Study Section[NIA-N]	7796262	1	NEUROSCIENCES	183710748	NHV3GTWSALA7	183710748	NHV3GTWSALA7	US	32.786754	-79.947265	7575301	MED U OF SOUTH CAROLINA		Non_Elite	female	99	CHARLESTON	SC	SCHOOLS OF MEDICINE	294074636	UNITED STATES	N	40422	40786	866	Other Research-Related	2010	70736	NIA	70736	#N/A
NHLBI	7788006	40409	PA-09-036	1K99HL098953-01A2	1	K99	HL	98953	1	A	ROTHGEB, ANN E	40422	40786	ZHL1-CSR-Z(O2)	9214471	11	OTHER BASIC SCIENCES	135781701	M5QFLTCTSQN6	135781701	M5QFLTCTSQN6	US	41.502657	-81.622127	10000858	CLEVELAND CLINIC LERNER COM CWRU		Non_Elite	female	99	CLEVELAND	OH	SCHOOLS OF MEDICINE	441950001	UNITED STATES	N	40422	40786	837	Other Research-Related	2010	89640	NHLBI	89640	coastal
NLM	7921476	40414	PA-07-297	5K99LM009889-02	5	K99	LM	9889	2		SIM, HUA-CHUAN	40057	40786	ZLM1-ZH-C(M3)	9098537	3	BIOSTATISTICS & OTHER MATH SCI	96997515	NPSNT86JKN51	96997515	NPSNT86JKN51	US	45.49882	-122.685647	6297007	OREGON HEALTH & SCI U		Non_Elite	female	98	PORTLAND	OR	SCHOOLS OF MEDICINE	972393098	UNITED STATES	N	40422	40786	879	Other Research-Related	2010	110591	NLM	110591	#N/A
NICHD	7770141	40415	PA-09-036	1K99HD062561-01	1	K99	HD	62561	1		JAVOIS, LORETTE CLAIRE	40422	41152	Developmental Biology Study Section[CHHD-C]	9710938	8	Unavailable	623972390	KTBYCLF8MQW7	623972390	KTBYCLF8MQW7	US	39.003015	-77.108117	485474	US NATIONAL INST/CHILD HLTH/HUMAN DEV		Non_Elite	female	88	BETHESDA	MD	Research Institutes	208922425	UNITED STATES	N	40422	41152	865	Other Research-Related	2010	1	NICHD	1	coastal
NIA	7989738	40416	PA-09-036	1K99AG033684-01A2	1	K99	AG	33684	1	A	CHEN, WEN G	40422	40724	Clinical Aging Study Section[NIA-C]	9338226	2	OTHER HEALTH PROFESSIONS	190827162	FZRNFQTKADH1	190827162	FZRNFQTKADH1	US	41.257804	-96.010358	578102	U OF NEBRASKA OMAHA		Non_Elite	female	81	OMAHA	NE	SCHOOLS OF EDUCATION	681820210	UNITED STATES	N	40422	40724	866	Other Research-Related	2010	80568	NIA	80568	coastal
NCI	7849953	40417	PA-07-297	5K99CA137158-02	5	K99	CA	137158	2		SCHMIDT, MICHAEL K	40057	40786	Institutional Training and Education Study Section (F)[NCI-F]	8910402	9	INTERNAL MEDICINE/MEDICINE	800772139	S3GMKS8ELA16	800772139	S3GMKS8ELA16	US	29.706319	-95.397195	578407	U OF TX MD ANDERSON CAN CTR		Non_Elite	female	75	HOUSTON	TX	HOSPITALS	770304009	UNITED STATES	N	40422	40786	398	Other Research-Related	2010	49550	NCI	49550	coastal
NICHD	7923111	40422	PA-07-297	5K99HD058698-02	5	K99	HD	58698	2		KAU, ALICE S	40057	41333	ZHD1-DSR-W(AM)	9234679	7	Unavailable	155342439	DKMDCB5HNBL7	155342439	DKMDCB5HNBL7	US	39.298699	-76.593679	2370003	HUGO W MOSER RES INST KENNEDY KRIEGER		Non_Elite	female	98	BALTIMORE	MD	Research Institutes	212051832	UNITED STATES	N	40422	41333	865	Other Research-Related	2010	89846	NICHD	89846	#N/A
NINDS	7941845	40422	PA-09-036	5K99NS067066-02	5	K99	NS	67066	2		SUTHERLAND, MARGARET L	40086	40786	NST-2 Study Section [NST-2]	9758097	7	Unavailable	76593722	Z1L9F1MM1RY3	76593722	Z1L9F1MM1RY3	US	42.337481	-71.104964	1504801	BOSTON CHILDRENS HOSP		Elite	female	67	BOSTON	MA	Independent Hospitals	21155724	UNITED STATES	N	40422	40786	853	Other Research-Related	2010	90000	NINDS	90000	coastal
NIDDK	7938717	40430	PA-09-036	5K99DK085144-02	5	K99	DK	85144	2		RANKIN, TRACY L	40081	41152	Kidney, Urologic and Hematologic Diseases D Study Section[DDK-D]	9601196	18	INTERNAL MEDICINE/MEDICINE	4514360	MKAGLD59JRL1	4514360	MKAGLD59JRL1	US	40.440909	-79.959125	2059802	U OF PITTSBURGH AT PITTSBURGH		Elite	female	84	PITTSBURGH	PA	SCHOOLS OF MEDICINE	152133320	UNITED STATES	N	40422	41152	847	Other Research-Related	2010	71756	NIDDK	71756	coastal
NIDCD	8028618	40504	PA-10-063	1K99DC011322-01	1	K99	DC	11322	1		SKLARE, DAN	40513	40968	Communication Disorders Review Committee[CDRC]	8934377	18	Unavailable	33098401	F7V2DLFLWJN9	33098401	F7V2DLFLWJN9	US	40.457062	-80.003694	1329103	ALLEGHENY SINGER RES INST		Non_Elite	female	98	PITTSBURGH	PA	Research Institutes	152124756	UNITED STATES	N	40513	40968	173	Other Research-Related	2011	82887	NIDCD	82887	coastal
NIGMS	8013311	40525	PA-09-036	5K99GM089987-02	5	K99	GM	89987	2		CARTER, ANTHONY D	40193	40755	ZGM1-BRT-9(KR)	9751535	2	BIOCHEMISTRY	50299031	K51LECU1G8N3	50299031	K51LECU1G8N3	US	29.717236	-95.402761	9291001	RICE U		Non_Elite	female	98	HOUSTON	TX	SCHOOLS OF ARTS AND SCIENCES	770051827	UNITED STATES	N	40544	40755	859	Other Research-Related	2011	89802	NIGMS	89802	#N/A
NIGMS	8011320	40542	PA-09-036	5K99GM089765-02	5	K99	GM	89765	2		FLICKER, PAULA F	40179	40724	ZGM1-BRT-9(KR)	6420773	2	ZOOLOGY	161202122	LCLSJAGTNZQ7	161202122	LCLSJAGTNZQ7	US	43.068519	-89.400858	578503	U OF WISCONSIN MADISON		Elite	female	97	MADISON	WI	SCHOOLS OF ARTS AND SCIENCES	537151218	UNITED STATES	N	40544	40724	859	Other Research-Related	2011	45000	NIGMS	45000	#N/A
NIEHS	8007444	40555	PA-09-036	5K99ES017780-02	5	K99	ES	17780	2		SHREFFLER, CAROL A	40179	40908	ZES1-LKB-J(K6)	9749129	12	OBSTETRICS & GYNECOLOGY	94878337	KMH5K9V7S518	94878337	KMH5K9V7S518	US	37.767442	-122.413937	577508	U OF CALIFORNIA SAN FRANCISCO		Elite	female	98	SAN FRANCISCO	CA	SCHOOLS OF MEDICINE	941432510	UNITED STATES	N	40555	40908	113	Other Research-Related	2011	90000	NIEHS	90000	coastal
NHLBI	8029302	40577	PA-10-063	1K99HL105791-01	1	K99	HL	105791	1		ROLTSCH, MARK	40578	41305	ZHL1-CSR-Z(O1)	10242707	2	GENETICS	603847393	MQE2JHHJW9Q8	603847393	MQE2JHHJW9Q8	US	42.2802	-71.758245	850903	U OF MASSACHUSETTS MED SCH WORCESTER		Non_Elite	female	98	WORCESTER	MA	SCHOOLS OF MEDICINE	16550002	UNITED STATES	N	40578	40939	837	Other Research-Related	2011	87172	NHLBI	87172	#N/A
NICHD	8019048	40589	PA-09-036	5K99HD060762-02	5	K99	HD	60762	2		EISENBERG, ESTHER	40210	40786	Reproduction, Andrology, and Gynecology Study Section[CHHD-R]	8922370	6	NONE	611012324	MWYVQTQ32ME5	611012324	MWYVQTQ32ME5	US	30.403353	-91.122687	577909	LSU PENNINGTON BIOMED RES CTR		Non_Elite	female	99	BATON ROUGE	LA	ORGANIZED RESEARCH UNITS	708084124	UNITED STATES	N	40575	40786	865	Other Research-Related	2011	61008	NICHD	61008	coastal
NIBIB	8035353	40597	PA-09-036	5K99EB011527-02	5	K99	EB	11527	2		ERIM, ZEYNEP	40238	40786	ZEB1-OSR-C(J1)S	10003954	11	RADIATION-DIAGNOSTIC/ONCOLOGY	77758407	HJMKEF7EJW69	77758407	HJMKEF7EJW69	US	41.502739	-81.607334	218601	CASE WESTERN RESERVE U		Non_Elite	female	98	CLEVELAND	OH	SCHOOLS OF MEDICINE	441061712	UNITED STATES	N	40603	40786	286	Other Research-Related	2011	28863	NIBIB	28863	coastal
NIAAA	8037202	40602	PA-09-036	5K99AA018387-02	5	K99	AA	18387	2		BAIZER, LAWRENCE	40238	41090	Neuroscience and Behavior Study Section[AA-4]	9631503	3	NEUROSCIENCES	43207562	FL6GV84CKN57	43207562	FL6GV84CKN57	US	41.310925	-72.926428	9420201	YALE U		Elite	female	95	NEW HAVEN	CT	SCHOOLS OF MEDICINE	65208327	UNITED STATES	N	40603	41090	273	Other Research-Related	2011	89744	NIAAA	89744	#N/A
NIMH	8051713	40603	PA-09-036	5K99MH086616-02	5	K99	MH	86616	2		CHURCHILL, JAMES D	40269	41090	ZMH1-ERB-L(01)	9517539	3	PSYCHIATRY	47120084	TX2DAGQPENZ5	47120084	TX2DAGQPENZ5	US	38.543366	-121.72946	577503	U OF CALIFORNIA AT DAVIS		Non_Elite	female	80	DAVIS	CA	SCHOOLS OF MEDICINE	956186153	UNITED STATES	N	40634	41090	242	Other Research-Related	2011	90000	NIMH	90000	coastal
NHLBI	8050580	40604	PA-09-036	5K99HL098458-02	5	K99	HL	98458	2		COOPER, LAWTON S	40269	40769	ZHL1-CSR-Z(O2)	9155014	4	PUBLIC HEALTH & PREV MEDICINE	608195277	D3LHU66KBLD5	608195277	D3LHU66KBLD5	US	35.9316	-79.057377	578206	U OF NORTH CAROLINA CHAPEL HILL	1644	Elite	female	93	CHAPEL HILL	NC	SCHOOLS OF PUBLIC HEALTH	275995023	UNITED STATES	N	40634	40769	837	Other Research-Related	2011	116947	NHLBI	116947	coastal
NHLBI	8045363	40604	PA-09-036	5K99HL098461-02	5	K99	HL	98461	2		CARLSON, DREW E	40252	40968	ZHL1-CSR-Z(O2)	9335134	7	Unavailable	30811269	QN6MS4VN7BD1	30811269	QN6MS4VN7BD1	US	42.336107	-71.107481	1080401	BRIGHAM AND WOMENS HOSP		Elite	female	98	BOSTON	MA	Independent Hospitals	21156110	UNITED STATES	N	40603	40968	837	Other Research-Related	2011	136962	NHLBI	136962	coastal
NHLBI	8052730	40605	PA-09-036	5K99HL097030-02	5	K99	HL	97030	2		CARLSON, DREW E	40269	40999	ZHL1-CSR-Z(F2)	8159579	18	RADIATION-DIAGNOSTIC/ONCOLOGY	9214214	HJD6G4D6TJY5	9214214	HJD6G4D6TJY5	US	37.426852	-122.17047	8046501	STANFORD U		Elite	female	97	STANFORD	CA	SCHOOLS OF MEDICINE	943052004	UNITED STATES	N	40634	40999	837	Other Research-Related	2011	91815	NHLBI	91815	#N/A
NIMH	8073207	40617	PA-09-036	5K99MH090115-02	5	K99	MH	90115	2		DESMOND, NANCY L	40312	40999	ZMH1-ERB-L(01)	10001078	7	NEUROLOGY	1910777	FTMTDMBR29C7	1910777	FTMTDMBR29C7	US	39.325256	-76.605131	4134401	JOHNS HOPKINS U		Elite	female	55	BALTIMORE	MD	SCHOOLS OF MEDICINE	212182680	UNITED STATES	N	40634	40999	281	Other Research-Related	2011	90000	NIMH	90000	coastal
NIDA	8053483	40621	PA-09-036	5K99DA027825-02	5	K99	DA	27825	2		ACRI, JANE	40299	41029	Career Development Education and Training Study Section[NIDA-K]	9771059	5	Unavailable	46514535	MCKWJYCWNVN3	46514535	MCKWJYCWNVN3	US	42.393619	-71.191142	1876801	MCLEAN HOSP		Elite	female	96	BELMONT	MA	Independent Hospitals	24781064	UNITED STATES	N	40664	41029	279	Other Research-Related	2011	124669	NIDA	124669	coastal
NINR	8050692	40623	PA-09-036	5K99NR012016-02	5	K99	NR	12016	2		HUSS, KAREN	40269	40999	Nursing Science Review Committee[NRRC(46)]	8195426	4	NONE	105300446	MLQFL4JSSAA9	105300446	MLQFL4JSSAA9	US	37.549807	-77.452775	353201	VIRGINIA COMMONWEALTH U		Non_Elite	female	93	RICHMOND	VA	SCHOOLS OF NURSING	232980568	UNITED STATES	N	40634	40999	361	Other Research-Related	2011	67065	NINR	67065	coastal
NIDDK	8053802	40623	PA-09-036	5K99DK087928-02	5	K99	DK	87928	2		HAFT, CAROL R	40269	41364	Digestive Diseases and Nutrition C Study Section[DDK-C]	9776634	8	Unavailable	73130411	FLJ7DQKLL226	73130411	FLJ7DQKLL226	US	42.363198	-71.068772	4907701	MASSACHUSETTS GENERAL HOSP		Elite	female	100	BOSTON	MA	Independent Hospitals	21142621	UNITED STATES	N	40634	41364	847	Other Research-Related	2011	90000	NIDDK	90000	coastal
NHLBI	8244607	40627	PA-07-297	7K99HL093213-03	7	K99	HL	93213	3		MONDORO, TRACI	39904	40816	ZHL1-CSR-Z(F2)	8506281	18	GENETICS	9214214	HJD6G4D6TJY5	9214214	HJD6G4D6TJY5	US	37.426852	-122.17047	8046501	STANFORD U		Elite	female	91	STANFORD	CA	SCHOOLS OF MEDICINE	943052004	UNITED STATES	N	40271	40816	837	Other Research-Related	2010	24189	NHLBI	24189	coastal
NINDS	8043540	40638	PA-09-036	5K99NS062894-02	5	K99	NS	62894	2		GNADT, JAMES W	40269	41090	ZNS1-SRB-M(73)	8874705	27	NONE	9584210	U2JMKHNS5TG4	9584210	U2JMKHNS5TG4	US	34.134332	-118.12652	1073501	CALIFORNIA INST OF TECHNOLOGY		Elite	female	69	PASADENA	CA	SCHOOLS OF ARTS AND SCIENCES	911250001	UNITED STATES	N	40634	41090	853	Other Research-Related	2011	90000	NINDS	90000	coastal
NIA	8073151	40640	PA-09-036	5K99AG036818-02	5	K99	AG	36818	2		WAGSTER, MOLLY V	40313	41151	Basic Neuroscience of Aging Study Section[NIA-N]	9680652	32	NONE	800188161	EJCVPNN1WFS5	800188161	EJCVPNN1WFS5	US	32.991725	-96.743697	578409	U OF TEXAS DALLAS		Non_Elite	female	97	RICHARDSON	TX	SCH ALLIED HEALTH PROFESSIONS	750803021	UNITED STATES	N	40664	41151	866	Other Research-Related	2011	89546	NIA	89546	coastal
NHLBI	8111440	40647	PA-10-063	1K99HL103974-01A1	1	K99	HL	103974	1	A	ROLTSCH, MARK	40648	40999	ZHL1-CSR-Z(F2)	9419746	6	INTERNAL MEDICINE/MEDICINE	937727907	SN7KD2UK7GC5	937727907	SN7KD2UK7GC5	US	36.059402	-80.321981	9021205	WAKE FOREST U HEALTH SCI		Non_Elite	female	98	WINSTON-SALEM	NC	SCHOOLS OF MEDICINE	271570001	UNITED STATES	N	40648	40999	837	Other Research-Related	2011	97200	NHLBI	97200	coastal
NIGMS	8056554	40651	PA-09-036	5K99GM092859-02	5	K99	GM	92859	2		CARTER, ANTHONY D	40299	41394	ZGM1-BRT-9(KR)	9859048	12	NEUROSCIENCES	71037113	LHGDNJMZ64Y1	71037113	LHGDNJMZ64Y1	US	40.763746	-73.955386	7056601	ROCKEFELLER U		Non_Elite	female	98	NEW YORK	NY	GRADUATE SCHOOLS	100656399	UNITED STATES	N	40664	41394	859	Other Research-Related	2011	90000	NIGMS	90000	coastal
NIAID	8090834	40662	PA-10-063	1K99AI093860-01	1	K99	AI	93860	1		HUNTLEY, CLAYTON C	40664	40844	Microbiology and Infectious Diseases B Research Study Section[MID-B]	8574454	1	MICROBIOLOGY/IMMUN/VIROLOGY	68552207	L6NFUM28LQM5	68552207	L6NFUM28LQM5	US	38.664368	-90.323797	9083901	WASHINGTON U		Non_Elite	female	98	SAINT LOUIS	MO	SCHOOLS OF MEDICINE	631304862	UNITED STATES	N	40664	40844	855	Other Research-Related	2011	90000	NIAID	90000	coastal
NIEHS	8068037	40683	PA-09-036	5K99ES018885-02	5	K99	ES	18885	2		SHREFFLER, CAROL A	40299	40908	Environmental Health Sciences Review Committee[EHS(01)]	8968735	3	PHARMACOLOGY	16060860	YXJGGNC5J269	16060860	YXJGGNC5J269	US	39.026584	-94.636347	1484303	U OF KANSAS MED CTR		Non_Elite	female	98	KANSAS CITY	KS	SCHOOLS OF MEDICINE	661608500	UNITED STATES	N	40664	40908	113	Other Research-Related	2011	89178	NIEHS	89178	coastal
NINDS	8068348	40694	PA-09-036	5K99NS070920-02	5	K99	NS	70920	2		OWENS, DAVID F	40330	41060	NST-2 Study Section [NST-2]	8708188	12	NEUROLOGY	94878337	KMH5K9V7S518	94878337	KMH5K9V7S518	US	37.767442	-122.413937	577508	U OF CALIFORNIA SAN FRANCISCO		Elite	female	98	SAN FRANCISCO	CA	SCHOOLS OF MEDICINE	941432510	UNITED STATES	N	40695	41060	853	Other Research-Related	2011	78670	NINDS	78670	#N/A
NINR	8115150	40696	PA-09-036	5K99NR012219-02	5	K99	NR	12219	2		ROOF, REBECCA	40381	41090	Nursing Science Review Committee[NRRC(47)]	8305799	7	OTHER HEALTH PROFESSIONS	98987217	W8XEAJDKMXH3	98987217	W8XEAJDKMXH3	US	41.871509	-87.667721	577703	U OF ILLINOIS AT CHICAGO		Non_Elite	female	98	Chicago	IL	SCHOOLS OF NURSING	606124305	UNITED STATES	N	40725	41090	361	Other Research-Related	2011	90000	NINR	90000	coastal
NIMH	8111890	40709	PA-09-036	5K99MH087813-02	5	K99	MH	87813	2		CHURCHILL, JAMES D	40374	41090	ZMH1-ERB-L(03)	9763495	12	PSYCHIATRY	60217502	YNT8TCJH8FQ8	60217502	YNT8TCJH8FQ8	US	40.7607	-73.9603	1514803	WEILL MED COLL OF CORNELL U		Elite	female	99	NEW YORK	NY	SCHOOLS OF MEDICINE	100654805	UNITED STATES	N	40725	41090	281	Other Research-Related	2011	85535	NIMH	85535	coastal
NIAMS	8103911	40709	PA-09-036	5K99AR059796-02	5	K99	AR	59796	2		BAKER, CARL	40360	40851	Arthritis and Musculoskeletal and Skin Diseases Special Grants Study Section[AMS]	9279128	12	BIOCHEMISTRY	94878337	KMH5K9V7S518	94878337	KMH5K9V7S518	US	37.767442	-122.413937	577508	U OF CALIFORNIA SAN FRANCISCO		Elite	female	73	SAN FRANCISCO	CA	SCHOOLS OF MEDICINE	941432510	UNITED STATES	N	40725	40851	846	Other Research-Related	2011	37702	NIAMS	37702	coastal
NHLBI	8133955	40710	PA-09-036	5K99HL097068-02	5	K99	HL	97068	2		NI, HANYU	40422	41304	ZHL1-CSR-Z(M2)	9635226	7	Unavailable	30811269	QN6MS4VN7BD1	30811269	QN6MS4VN7BD1	US	42.336107	-71.107481	1080401	BRIGHAM AND WOMENS HOSP		Elite	female	98	BOSTON	MA	Independent Hospitals	21156110	UNITED STATES	N	40725	41304	837	Other Research-Related	2011	117273	NHLBI	117273	coastal
NHLBI	8090394	40710	PA-09-036	5K99HL095769-02	5	K99	HL	95769	2		CARLSON, DREW E	40360	41090	ZHL1-CSR-Z(F2)	7162747	18	PHARMACOLOGY	4514360	MKAGLD59JRL1	4514360	MKAGLD59JRL1	US	40.440909	-79.959125	2059802	U OF PITTSBURGH AT PITTSBURGH		Elite	female	96	PITTSBURGH	PA	SCHOOLS OF MEDICINE	152133320	UNITED STATES	N	40725	41090	837	Other Research-Related	2011	90000	NHLBI	90000	coastal
NINR	8130965	40711	PA-09-036	5K99NR012232-02	5	K99	NR	12232	2		TIGNO, XENIA	40409	41162	Nursing Science Review Committee[NRRC(47)]	10228432	7	OTHER HEALTH PROFESSIONS	605799469	HD1WMN6945W6	605799469	HD1WMN6945W6	US	47.660307	-122.315168	9087701	U OF WASHINGTON		Elite	female	93	SEATTLE	WA	SCHOOLS OF NURSING	981959472	UNITED STATES	N	40725	41162	361	Other Research-Related	2011	89478	NINR	89478	#N/A
NIDDK	8141989	40715	PA-09-036	5K99DK088963-02	5	K99	DK	88963	2		BISHOP, TERRY ROGERS	40436	41090	Kidney, Urologic and Hematologic Diseases D Study Section[DDK-D]	10180684	7	Unavailable	76593722	Z1L9F1MM1RY3	76593722	Z1L9F1MM1RY3	US	42.337481	-71.104964	1504801	BOSTON CHILDRENS HOSP		Elite	female	90	BOSTON	MA	Independent Hospitals	21155724	UNITED STATES	N	40725	41090	847	Other Research-Related	2011	133515	NIDDK	133515	coastal
NHLBI	8123209	40716	PA-09-036	5K99HL103846-03	5	K99	HL	103846	3		CARLSON, DREW E	40404	41090	ZHL1-CSR-Z(M2)	10228766	3	INTERNAL MEDICINE/MEDICINE	832127323	DLWBSLWAJWR1	832127323	DLWBSLWAJWR1	US	39.999598	-83.033131	6218701	OHIO STATE U		Non_Elite	female	75	COLUMBUS	OH	SCHOOLS OF MEDICINE	432101016	UNITED STATES	N	40725	41090	837	Other Research-Related	2011	112766	NHLBI	112766	#N/A
NIA	8074413	40722	PA-09-036	5K99AG034214-02	5	K99	AG	34214	2		MILLER, MARILYN	40330	41243	Basic Neuroscience of Aging Study Section[NIA-N]	9320106	7	INTERNAL MEDICINE/MEDICINE	605799469	HD1WMN6945W6	605799469	HD1WMN6945W6	US	47.660307	-122.315168	9087701	U OF WASHINGTON		Elite	female	92	SEATTLE	WA	SCHOOLS OF MEDICINE	981959472	UNITED STATES	N	40725	41243	866	Other Research-Related	2011	127116	NIA	127116	coastal
NLM	8190163	40725	PA-10-063	1K99LM010943-01A1	1	K99	LM	10943	1	A	SIM, HUA-CHUAN	40725	41090	Biomedical Informatics, Library and Data Sciences Review Committee[BLR]	9582918	18	MISCELLANEOUS	4514360	MKAGLD59JRL1	4514360	MKAGLD59JRL1	US	40.440909	-79.959125	2059802	U OF PITTSBURGH AT PITTSBURGH	3809	Elite	female	98	PITTSBURGH	PA	SCHOOLS OF MEDICINE	152133320	UNITED STATES	N	40725	41090	879	Other Research-Related	2011	89802	NLM	89802	#N/A
NIAMS	8121624	40725	PA-09-036	5K99AR057093-02	5	K99	AR	57093	2		LESTER, GAYLE E	40395	41175	Arthritis and Musculoskeletal and Skin Diseases Special Grants Study Section[AMS]	8193720	7	Unavailable	71723621	C1CPANL3EWK4	71723621	C1CPANL3EWK4	US	42.33982	-71.10568	758101	BETH ISRAEL DEACONESS MED CTR		Elite	female	60	BOSTON	MA	Independent Hospitals	22155400	UNITED STATES	N	40725	41175	846	Other Research-Related	2011	89995	NIAMS	89995	coastal
NHLBI	8144808	40731	PA-10-063	5K99HL105793-02	5	K99	HL	105793	2		SCHRAMM, CHARLENE A	40441	41121	ZHL1-CSR-Z(O1)	9341416	18	INTERNAL MEDICINE/MEDICINE	9214214	HJD6G4D6TJY5	9214214	HJD6G4D6TJY5	US	37.426852	-122.17047	8046501	STANFORD U		Elite	female	98	STANFORD	CA	SCHOOLS OF MEDICINE	943052004	UNITED STATES	N	40756	41121	837	Other Research-Related	2011	101397	NHLBI	101397	coastal
NIGMS	8166004	40735	PA-10-063	1K99GM098448-01	1	K99	GM	98448	1		MARCUS, STEPHEN	40735	41090	ZGM1-BRT-X(KR)	10664547	13	BIOCHEMISTRY	124726725	GS3YEVSS12N6	124726725	GS3YEVSS12N6	US	37.870017	-122.268624	577502	U OF CALIFORNIA BERKELEY		Elite	female	98	BERKELEY	CA	SCHOOLS OF ARTS AND SCIENCES	947101749	UNITED STATES	N	40735	41090	859	Other Research-Related	2011	90000	NIGMS	90000	coastal
NCI	8100372	40738	PA-09-036	5K99CA149140-02	5	K99	CA	149140	2		SCHMIDT, MICHAEL K	40360	41003	Institutional Training and Education Study Section (F)[NCI-F]	9982195	9	INTERNAL MEDICINE/MEDICINE	800772139	S3GMKS8ELA16	800772139	S3GMKS8ELA16	US	29.706319	-95.397195	578407	U OF TX MD ANDERSON CAN CTR		Non_Elite	female	98	HOUSTON	TX	HOSPITALS	770304009	UNITED STATES	N	40725	41003	398	Other Research-Related	2011	89982	NCI	89982	#N/A
NICHD	8066307	40739	PA-09-036	5K99HD060947-02	5	K99	HD	60947	2		LAMAR, CHARISEE A	40294	41305	Reproduction, Andrology, and Gynecology Study Section[CHHD-R]	6719932	52	OBSTETRICS & GYNECOLOGY	804355790	UYTTZT6G9DT1	804355790	UYTTZT6G9DT1	US	32.876991	-117.24087	577507	U OF CALIFORNIA SAN DIEGO		Elite	female	98	LA JOLLA	CA	SCHOOLS OF MEDICINE	920930621	UNITED STATES	N	40787	41305	865	Other Research-Related	2011	93121	NICHD	93121	#N/A
NIA	8116990	40739	PA-09-036	5K99AG036817-02	5	K99	AG	36817	2		VELAZQUEZ, JOSE M	40391	41274	Biological Aging Study Section[NIA-B]	8481802	4	INTERNAL MEDICINE/MEDICINE	608195277	D3LHU66KBLD5	608195277	D3LHU66KBLD5	US	35.9316	-79.057377	578206	U OF NORTH CAROLINA CHAPEL HILL		Elite	female	92	CHAPEL HILL	NC	SCHOOLS OF MEDICINE	275995023	UNITED STATES	N	40756	41274	866	Other Research-Related	2011	74389	NIA	74389	#N/A
NIMH	8096568	40739	PA-09-036	5K99MH087627-02	5	K99	MH	87627	2		HILL, LAUREN D	40360	41090	ZMH1-ERB-L(03)	9613296	3	PSYCHIATRY	43207562	FL6GV84CKN57	43207562	FL6GV84CKN57	US	41.310925	-72.926428	9420201	YALE U		Elite	female	97	NEW HAVEN	CT	SCHOOLS OF MEDICINE	65208327	UNITED STATES	N	40725	41090	281	Other Research-Related	2011	89995	NIMH	89995	coastal
NICHD	8129617	40742	PA-09-036	5K99HD065870-02	5	K99	HD	65870	2		TAYMANS, SUSAN	40406	41090	Reproduction, Andrology, and Gynecology Study Section[CHHD-R]	10155486	23	OTHER BASIC SCIENCES	872612445	G56PUALJ3KT5	872612445	CCV3WG2JG248; D4H1NV4APKP3; ELS2M3C6V2S5; EQA8NBEN9WD5; FFAZGE9NH3M8; G56PUALJ3KT5; K6JRCJJXFET1; M8FBSLHASMT3; P4LRVQT1H4K5; PJUVN8AT5416; RT1JPM9UMGM5; ZBMGUAZYFGC4; ZMP8BDLJTUW9	US	42.438	-76.4625	1514802	CORNELL U		Elite	female	98	ITHACA	NY	SCHOOLS OF VETERINARY MEDICINE	148502820	UNITED STATES	N	40725	41090	865	Other Research-Related	2011	145746	NICHD	145746	coastal
NICHD	8116449	40742	PA-09-036	5K99HD065873-02	5	K99	HD	65873	2		JAVOIS, LORETTE CLAIRE	40391	41274	Developmental Biology Study Section[CHHD-C]	10200992	18	ANATOMY/CELL BIOLOGY	9214214	HJD6G4D6TJY5	9214214	HJD6G4D6TJY5	US	37.426852	-122.17047	8046501	STANFORD U		Elite	female	93	STANFORD	CA	SCHOOLS OF MEDICINE	943052004	UNITED STATES	N	40756	41274	865	Other Research-Related	2011	125496	NICHD	125496	coastal
NICHD	8106325	40742	PA-09-036	5K99HD061485-02	5	K99	HD	61485	2		FREUND, LISA S	40366	41090	ZHD1-MRG-C(ZL)	9529540	8	Unavailable	73130411	FLJ7DQKLL226	73130411	FLJ7DQKLL226	US	42.363198	-71.068772	4907701	MASSACHUSETTS GENERAL HOSP		Elite	female	97	BOSTON	MA	Independent Hospitals	21142621	UNITED STATES	N	40725	41090	865	Other Research-Related	2011	133300	NICHD	133300	coastal
NIA	8209246	40743	PA-10-063	5K99AG035002-03	5	K99	AG	35002	3		JOSEPH, LYNDON	40451	40939	Clinical Aging Study Section[NIA-C]	9739201	7	Unavailable	78200995	HMSNCM57QNR5	78200995	HMSNCM57QNR5	US	47.627342	-122.331593	861001	FRED HUTCHINSON CANCER RES CTR		Elite	female	99	SEATTLE	WA	Research Institutes	981094433	UNITED STATES	N	40787	40939	866	Other Research-Related	2011	105438	NIA	105438	#N/A
NIMH	8143543	40744	PA-10-063	5K99MH090236-02	5	K99	MH	90236	2		DESMOND, NANCY L	40436	40861	ZMH1-ERB-L(05)	9979759	7	PSYCHIATRY	63690705	YND4PLMC9AN7	63690705	YND4PLMC9AN7	US	33.50591	-86.799772	1288803	U OF ALABAMA AT BIRMINGHAM		Non_Elite	female	98	BIRMINGHAM	AL	SCHOOLS OF MEDICINE	352940001	UNITED STATES	N	40756	40861	281	Other Research-Related	2011	89342	NIMH	89342	coastal
NICHD	8131815	40744	PA-09-036	5K99HD065957-02	5	K99	HD	65957	2		QUATRANO, LOUIS A	40407	41181	Function, Integration, and Rehabilitation Sciences Study Section[CHHD-K]	8714925	11	Unavailable	29128969	YH7QN736BQF3	29128969	YH7QN736BQF3	US	40.796906	-74.259164	859402	KESSLER FOUNDATION INC		Non_Elite	female	98	East Hanover	NJ	Research Institutes	79363147	UNITED STATES	N	40725	41181	865	Other Research-Related	2011	117197	NICHD	117197	coastal
NIDDK	8126454	40745	PA-09-036	5K99DK082644-02	5	K99	DK	82644	2		RANKIN, TRACY L	40405	41486	Kidney, Urologic and Hematologic Diseases D Study Section[DDK-D]	9359667	5	UROLOGY	555917996	KABJZBBJ4B54	555917996	KABJZBBJ4B54	US	44.975143	-93.227003	1450402	U OF MINNESOTA		Non_Elite	female	56	MINNEAPOLIS	MN	SCHOOLS OF MEDICINE	554552070	UNITED STATES	N	40756	41486	847	Other Research-Related	2011	89791	NIDDK	89791	#N/A
NIDDK	8115793	40746	PA-09-036	5K99DK085142-02	5	K99	DK	85142	2		MARGOLIS, RONALD N	40379	40786	Diabetes, Endocrinology and Metabolic Diseases B Study Section[DDK-B]	9585745	7	PEDIATRICS	1910777	FTMTDMBR29C7	1910777	FTMTDMBR29C7	US	39.325256	-76.605131	4134401	JOHNS HOPKINS U		Elite	female	79	BALTIMORE	MD	SCHOOLS OF MEDICINE	212182680	UNITED STATES	N	40725	40786	847	Other Research-Related	2011	90000	NIDDK	90000	#N/A
NIGMS	8165813	40746	PA-10-063	1K99GM098436-01	1	K99	GM	98436	1		HAGAN, ANN A	40756	41121	ZGM1-BRT-X(KR)	8950088	20	BIOCHEMISTRY	125084723	VXUFPE4MCZH5	125084723	VXUFPE4MCZH5	US	36.97756	-122.055836	577510	U OF CALIFORNIA SANTA CRUZ		Non_Elite	female	98	SANTA CRUZ	CA	SCHOOLS OF ARTS AND SCIENCES	950641077	UNITED STATES	N	40756	41121	859	Other Research-Related	2011	86319	NIGMS	86319	coastal
NEI	8111580	40749	PA-10-063	1K99EY020865-01A1	1	K99	EY	20865	1	A	NEUHOLD, LISA	40756	41486	ZEY1-VSN(10)	10204572	27	OPHTHALMOLOGY	52780918	F8THLJQSAF93	52780918	F8THLJQSAF93	US	25.713468	-80.277246	5221250	U OF MIAMI SCH OF MED	1164	Non_Elite	female	97	CORAL GABLES	FL	SCHOOLS OF MEDICINE	331462926	UNITED STATES	N	40756	41121	867	Other Research-Related	2011	89996	NEI	89996	coastal
NIDCR	8143488	40749	PAR-09-256	5K99DE021442-02	5	K99	DE	21442	2		FRIEDEN, LESLIE A	40436	41152	NIDCR Special Grants Review Committee[DSR]	10322175	5	DENTISTRY	22254226	H6D6JMXJXDE6	22254226	H6D6JMXJXDE6	US	41.734182	-72.793791	1506603	U OF CONNECTICUT SCH OF MED/DNT	1970	Non_Elite	female	100	FARMINGTON	CT	SCHOOLS OF DENTISTRY/ORAL HYGN	60305335	UNITED STATES	N	40787	41152	121	Other Research-Related	2011	120960	NIDCR	120960	coastal
NICHD	8133071	40750	PA-09-036	5K99HD064793-02	5	K99	HD	64793	2		GRAVE, GILMAN D	40451	41243	Pediatrics Study Section[CHHD-A]	9959863	7	Unavailable	71723084	UUUMQVGJNNX1	71723084	UUUMQVGJNNX1	US	42.338497	-71.108264	2133701	JOSLIN DIABETES CTR		Elite	female	98	BOSTON	MA	Research Institutes	22155306	UNITED STATES	N	40756	41243	865	Other Research-Related	2011	118053	NICHD	118053	coastal
NINR	8128450	40750	PA-09-036	5K99NR012217-02	5	K99	NR	12217	2		HUSS, KAREN	40405	41121	Nursing Science Review Committee[NRRC(47)]	10127958	3	NONE	16060860	YXJGGNC5J269	16060860	YXJGGNC5J269	US	39.026584	-94.636347	1484303	U OF KANSAS MED CTR		Non_Elite	female	99	KANSAS CITY	KS	SCH ALLIED HEALTH PROFESSIONS	661608500	UNITED STATES	N	40756	41121	361	Other Research-Related	2011	77857	NINR	77857	coastal
NIEHS	8127947	40753	PA-09-036	5K99ES018892-02	5	K99	ES	18892	2		SHREFFLER, CAROL A	40402	41121	Environmental Health Sciences Review Committee[EHS(01)]	9244139	7	Unavailable	30811269	QN6MS4VN7BD1	30811269	QN6MS4VN7BD1	US	42.336107	-71.107481	1080401	BRIGHAM AND WOMENS HOSP		Elite	female	68	BOSTON	MA	Independent Hospitals	21156110	UNITED STATES	N	40756	41121	113	Other Research-Related	2011	125685	NIEHS	125685	coastal
NIEHS	8119152	40753	PA-09-036	5K99ES018891-02	5	K99	ES	18891	2		SHREFFLER, CAROL A	40391	41121	Environmental Health Sciences Review Committee[EHS(01)]	8691731	6	PHARMACOLOGY	1912864	M1LVPE5GLSD9	1912864	M1LVPE5GLSD9	US	40.481906	-74.457066	1196203	RUTGERS THE STATE U OF NJ		Non_Elite	female	96	PISCATAWAY	NJ	SCHOOLS OF PHARMACY	88543925	UNITED STATES	N	40756	41121	113	Other Research-Related	2011	92133	NIEHS	92133	#N/A
NCI	8131875	40756	PA-09-036	5K99CA151412-02	5	K99	CA	151412	2		SCHMIDT, MICHAEL K	40409	41121	Institutional Training and Education Study Section (F)[NCI-F]	10363044	12	NEUROSURGERY	94878337	KMH5K9V7S518	94878337	KMH5K9V7S518	US	37.767442	-122.413937	577508	U OF CALIFORNIA SAN FRANCISCO		Elite	female	92	SAN FRANCISCO	CA	SCHOOLS OF MEDICINE	941432510	UNITED STATES	N	40756	41121	398	Other Research-Related	2011	122419	NCI	122419	coastal
NCI	8146014	40758	PA-09-036	5K99CA151869-02	5	K99	CA	151869	2		SCHMIDT, MICHAEL K	40442	41152	Institutional Training and Education Study Section (F)[NCI-F]	10208179	3	Unavailable	73757627	G7MQPLSUX1L4	73757627	G7MQPLSUX1L4	US	39.946632	-75.196604	1499101	CHILDRENS HOSP OF PHILADELPHIA		Elite	female	96	PHILADELPHIA	PA	Independent Hospitals	191462305	UNITED STATES	N	40787	41152	398	Other Research-Related	2011	174960	NCI	174960	#N/A
NEI	8091078	40759	PA-10-063	1K99EY021503-01	1	K99	EY	21503	1		STEINMETZ, MICHAEL A	40787	41152	ZEY1-VSN(10)	7983374	3	NEUROSCIENCES	42250712	GM1XX56LEP58	42250712	GM1XX56LEP58	US	39.953462	-75.193983	6463801	U OF PENNSYLVANIA		Elite	female	98	PHILADELPHIA	PA	SCHOOLS OF MEDICINE	191046205	UNITED STATES	N	40787	41152	867	Other Research-Related	2011	74286	NEI	74286	coastal
NICHD	8121638	40759	PA-09-036	5K99HD065741-02	5	K99	HD	65741	2		ESPOSITO, LAYLA E	40396	41121	Biobehavioral and Behavioral Sciences Study Section[CHHD-H]	9709742	18	PSYCHOLOGY	9214214	HJD6G4D6TJY5	9214214	HJD6G4D6TJY5	US	37.426852	-122.17047	8046501	STANFORD U		Elite	female	98	STANFORD	CA	SCHOOLS OF ARTS AND SCIENCES	943052004	UNITED STATES	N	40756	41121	865	Other Research-Related	2011	73774	NICHD	73774	#N/A
NINDS	8129458	40760	PA-10-063	5K99NS072192-02	5	K99	NS	72192	2		OWENS, DAVID F	40451	40922	NST-2 Study Section [NST-2]	10386386	7	Unavailable	76593722	Z1L9F1MM1RY3	76593722	Z1L9F1MM1RY3	US	42.337481	-71.104964	1504801	BOSTON CHILDRENS HOSP		Elite	female	97	BOSTON	MA	Independent Hospitals	21155724	UNITED STATES	N	40787	40922	853	Other Research-Related	2011	90000	NINDS	90000	coastal
NIA	8149838	40766	PA-10-063	5K99AG036848-02	5	K99	AG	36848	2		WAGSTER, MOLLY V	40451	41152	ZAG1-ZIJ-7(02)M	9680659	32	NONE	800188161	EJCVPNN1WFS5	800188161	EJCVPNN1WFS5	US	32.991725	-96.743697	578409	U OF TEXAS DALLAS		Non_Elite	female	96	RICHARDSON	TX	SCH ALLIED HEALTH PROFESSIONS	750803021	UNITED STATES	N	40787	41152	866	Other Research-Related	2011	89546	NIA	89546	coastal
NIA	8149845	40766	PA-10-063	5K99AG036845-02	5	K99	AG	36845	2		WAGSTER, MOLLY V	40451	41274	Basic Neuroscience of Aging Study Section[NIA-N]	8766674	7	PSYCHOLOGY	49435266	THL6A6JLE1S7	49435266	THL6A6JLE1S7	US	42.349594	-71.099726	10001093	BOSTON U (CHARLES RIVER CAMPUS)		Non_Elite	female	97	BOSTON	MA	SCHOOLS OF ARTS AND SCIENCES	22151390	UNITED STATES	N	40787	41274	866	Other Research-Related	2011	89885	NIA	89885	#N/A
NIA	8117077	40771	PA-09-036	5K99AG037646-02	5	K99	AG	37646	2		GUO, MAX	40391	41333	Biological Aging Study Section[NIA-B]	10236393	3	ANATOMY/CELL BIOLOGY	42250712	GM1XX56LEP58	42250712	GM1XX56LEP58	US	39.953462	-75.193983	6463801	U OF PENNSYLVANIA		Elite	female	61	PHILADELPHIA	PA	SCHOOLS OF MEDICINE	191046205	UNITED STATES	N	40787	41333	866	Other Research-Related	2011	95688	NIA	95688	coastal
NIDDK	8129645	40772	PA-09-036	5K99DK088360-02	5	K99	DK	88360	2		PODSKALNY, JUDITH M,	40410	41455	Digestive Diseases and Nutrition C Study Section[DDK-C]	9790393	10	Unavailable	623216371	G4ALRBCZ52G7	623216371	G4ALRBCZ52G7	US	40.758211	-73.961227	7924903	ST LUKES ROOSEVELT INST FOR HLTH SCI		Non_Elite	female	98	NEW YORK	NY	Research Institutes	10025	UNITED STATES	N	40725	41455	847	Other Research-Related	2011	89819	NIDDK	89819	#N/A
NIA	8164945	40773	PA-10-063	1K99AG040194-01	1	K99	AG	40194	1		WISE, BRADLEY C	40787	41152	Basic Neuroscience of Aging Study Section[NIA-N]	8533228	13	NONE	41544081	Y8CWNJRCNN91	41544081	Y8CWNJRCNN91	US	40.116857	-88.228755	577704	U OF ILLINOIS AT URBANA CHAMPAIGN		Non_Elite	female	98	CHAMPAIGN	IL	ORGANIZED RESEARCH UNITS	618207473	UNITED STATES	N	40787	41152	866	Other Research-Related	2011	85256	NIA	85256	coastal
NIGMS	8132566	40777	PA-09-036	5K99GM094293-02	5	K99	GM	94293	2		FLICKER, PAULA F	40410	40939	ZGM1-BRT-9(KR)	8586808	20	BIOCHEMISTRY	125084723	VXUFPE4MCZH5	125084723	VXUFPE4MCZH5	US	36.97756	-122.055836	577510	U OF CALIFORNIA SANTA CRUZ	565	Non_Elite	female	94	SANTA CRUZ	CA	SCHOOLS OF ARTS AND SCIENCES	950641077	UNITED STATES	N	40756	40939	859	Other Research-Related	2011	40377	NIGMS	40377	coastal
NIDDK	8145179	40777	PA-10-063	5K99DK090101-02	5	K99	DK	90101	2		HYDE, JAMES F	40441	41152	Diabetes, Endocrinology and Metabolic Diseases B Study Section[DDK-B]	8557462	12	INTERNAL MEDICINE/MEDICINE	73133571	GNJ7BBP73WE9	73133571	GNJ7BBP73WE9	US	42.275494	-83.743038	1506502	U OF MICHIGAN AT ANN ARBOR		Elite	female	98	ANN ARBOR	MI	SCHOOLS OF MEDICINE	481091276	UNITED STATES	N	40787	41152	847	Other Research-Related	2011	90000	NIDDK	90000	#N/A
NINDS	8136008	40777	PA-10-063	5K99NS072252-02	5	K99	NS	72252	2		RIDDLE, ROBERT D	40422	40999	NST-2 Study Section [NST-2]	8406800	12	PHYSIOLOGY	94878337	KMH5K9V7S518	94878337	KMH5K9V7S518	US	37.767442	-122.413937	577508	U OF CALIFORNIA SAN FRANCISCO		Elite	female	97	SAN FRANCISCO	CA	SCHOOLS OF MEDICINE	941432510	UNITED STATES	N	40787	40999	853	Other Research-Related	2011	72129	NINDS	72129	#N/A
NIEHS	8133499	40778	PA-09-036	5K99ES018890-02	5	K99	ES	18890	2		SHREFFLER, CAROL A	40422	40968	Environmental Health Sciences Review Committee[EHS(01)]	9939675	13	PUBLIC HEALTH & PREV MEDICINE	621889815	QHF5ZZ114M72	621889815	QHF5ZZ114M72	US	40.8415	-73.9414	1833205	COLUMBIA U HEALTH SCI		Elite	female	99	NEW YORK	NY	SCHOOLS OF PUBLIC HEALTH	100323725	UNITED STATES	N	40787	40968	113	Other Research-Related	2011	46554	NIEHS	46554	coastal
NLM	8145599	40780	PA-09-036	5K99LM010822-02	5	K99	LM	10822	2		YE, JANE	40451	40968	ZLM1-ZH-C(M3)	9718912	18	MISCELLANEOUS	4514360	MKAGLD59JRL1	4514360	MKAGLD59JRL1	US	40.440909	-79.959125	2059802	U OF PITTSBURGH AT PITTSBURGH		Elite	female	76	PITTSBURGH	PA	SCHOOLS OF MEDICINE	152133320	UNITED STATES	N	40816	40968	879	Other Research-Related	2011	90000	NLM	90000	coastal
NICHD	8091862	40783	PA-10-063	1K99HD068506-01	1	K99	HD	68506	1		BURES, REGINA M	40787	41152	Health, Behavior, and Context Study Section[CHHD-M]	10418550	7	NONE	149617367	UNVDZNFA8R29	149617367	UNVDZNFA8R29	US	42.335306	-71.102775	3212904	HARVARD SCH OF PUBLIC HEALTH		Elite	female	100	BOSTON	MA	SCHOOLS OF PUBLIC HEALTH	21156028	UNITED STATES	N	40787	41152	865	Other Research-Related	2011	129843	NICHD	129843	coastal
NIAMS	8166019	40784	PA-10-063	1K99AR061465-01	1	K99	AR	61465	1		BOYCE, AMANDA T	40787	41121	Arthritis and Musculoskeletal and Skin Diseases Special Grants Study Section[AMS]	9197367	18	MICROBIOLOGY/IMMUN/VIROLOGY	9214214	HJD6G4D6TJY5	9214214	HJD6G4D6TJY5	US	37.426852	-122.17047	8046501	STANFORD U		Elite	female	94	STANFORD	CA	SCHOOLS OF MEDICINE	943052004	UNITED STATES	N	40787	41121	846	Other Research-Related	2011	86292	NIAMS	86292	coastal
NIDDK	8142096	40784	PA-09-036	5K99DK087922-02	5	K99	DK	87922	2		RANKIN, TRACY L	40436	41121	ZDK1-GRB-G(J2)M	9932125	18	PEDIATRICS	4514360	MKAGLD59JRL1	4514360	MKAGLD59JRL1	US	40.440909	-79.959125	2059802	U OF PITTSBURGH AT PITTSBURGH		Elite	female	98	PITTSBURGH	PA	SCHOOLS OF MEDICINE	152133320	UNITED STATES	N	40756	41121	847	Other Research-Related	2011	90000	NIDDK	90000	coastal
NCI	8139858	40786	PA-09-036	7K99CA143229-02	7	K99	CA	143229	2		SCHMIDT, MICHAEL K	40430	41152	Institutional Training and Education Study Section (F)[NCI-F]	9171661	20	NONE	152652822	NHH3T1Z96H29	152652822	NHH3T1Z96H29	US	42.691708	-73.825588	5992604	STATE U OF NEW YORK AT ALBANY	553	Non_Elite	female	98	ALBANY	NY	SCHOOLS OF ARTS AND SCIENCES	122220001	UNITED STATES	N	40787	41152	398	Other Research-Related	2011	115314	NCI	115314	coastal
NHLBI	8133483	40787	PA-09-036	5K99HL098688-02	5	K99	HL	98688	2		CARLSON, DREW E	40422	41273	ZHL1-CSR-Z(M2)	9408579	18	INTERNAL MEDICINE/MEDICINE	9214214	HJD6G4D6TJY5	9214214	HJD6G4D6TJY5	US	37.426852	-122.17047	8046501	STANFORD U		Elite	female	87	STANFORD	CA	SCHOOLS OF MEDICINE	943052004	UNITED STATES	N	40725	41273	837	Other Research-Related	2011	132786	NHLBI	132786	#N/A
NICHD	8175521	40788	PA-10-063	1K99HD069624-01	1	K99	HD	69624	1		URV, TIINA K	40796	41152	Developmental Biology Study Section[CHHD-C]	10384717	52	NEUROSCIENCES	804355790	UYTTZT6G9DT1	804355790	UYTTZT6G9DT1	US	32.876991	-117.24087	577507	U OF CALIFORNIA SAN DIEGO		Elite	female	98	LA JOLLA	CA	SCHOOLS OF MEDICINE	920930621	UNITED STATES	N	40796	41152	865	Other Research-Related	2011	81320	NICHD	81320	#N/A
NHGRI	8166365	40791	PA-10-063	1K99HG006265-01	1	K99	HG	6265	1		VOLPI, SIMONA	40792	41090	Genome Research Study Section[GNOM(M1)-G]	10602964	1	GENETICS	5421136	ZUE9HKT2CLC9	5421136	ZUE9HKT2CLC9	US	41.789554	-87.601172	1413601	U OF CHICAGO		Elite	female	98	CHICAGO	IL	SCHOOLS OF MEDICINE	606372612	UNITED STATES	N	40792	41090	172	Other Research-Related	2011	89532	NHGRI	89532	#N/A
NIGMS	8131603	40794	PA-09-036	5K99GM094335-02	5	K99	GM	94335	2		FLICKER, PAULA F	40422	41060	ZGM1-BRT-9(KR)	9889014	7	BIOLOGY	47006379	JDLVAVGYJQ21	47006379	JDLVAVGYJQ21	US	42.335672	-71.104237	3212902	HARVARD MED SCH		Elite	female	98	BOSTON	MA	SCHOOLS OF MEDICINE	21201616	UNITED STATES	N	40787	41060	859	Other Research-Related	2011	45000	NIGMS	45000	coastal
NICHD	8131762	40800	PA-09-036	5K99HD065786-02	5	K99	HD	65786	2		URV, TIINA K	40410	41305	Pediatrics Study Section[CHHD-A]	10082874	2	PEDIATRICS	62761671	Z1H9VJS8NG16	62761671	Z1H9VJS8NG16	US	41.664405	-91.542152	3972901	U OF IOWA		Non_Elite	female	98	IOWA CITY	IA	SCHOOLS OF MEDICINE	522421320	UNITED STATES	N	40756	41305	865	Other Research-Related	2011	77845	NICHD	77845	#N/A
NCI	8136643	40800	PA-09-036	5K99CA142898-02	5	K99	CA	142898	2		SCHMIDT, MICHAEL K	40422	41152	Institutional Training and Education Study Section (F)[NCI-F]	9610336	9	ANATOMY/CELL BIOLOGY	51113330	FXKMA43NTV21	51113330	FXKMA43NTV21	US	29.70926	-95.400851	481201	BAYLOR COLL OF MED		Non_Elite	female	89	HOUSTON	TX	SCHOOLS OF MEDICINE	770303411	UNITED STATES	N	40787	41152	398	Other Research-Related	2011	139334	NCI	139334	coastal
NIMH	8223191	40940	PA-10-063	5K99MH092438-02	5	K99	MH	92438	2		DESMOND, NANCY L	40581	41138	ZMH1-ERB-L(05)	9299542	3	Unavailable	73757627	G7MQPLSUX1L4	73757627	G7MQPLSUX1L4	US	39.946632	-75.196604	1499101	CHILDRENS HOSP OF PHILADELPHIA		Elite	female	99	PHILADELPHIA	PA	Independent Hospitals	191462305	UNITED STATES	N	40940	41138	281	Other Research-Related	2012	89981	NIMH	89981	coastal
NIMH	8231283	40940	PA-10-063	5K99MH093388-02	5	K99	MH	93388	2		SARAMPOTE, CHRISTOPHER S	40592	41305	ZMH1-ERB-L(01)	10041920	33	NEUROLOGY	92530369	RN64EPNH8JC6	92530369	RN64EPNH8JC6	US	34.070199	-118.45102	577505	U OF CALIFORNIA LOS ANGELES		Elite	female	88	LOS ANGELES	CA	SCHOOLS OF MEDICINE	900952000	UNITED STATES	N	40940	41305	281	Other Research-Related	2012	87750	NIMH	87750	coastal
NIDCR	8270796	40942	PA-11-197	1K99DE022624-01	1	K99	DE	22624	1		FRIEDEN, LESLIE A	41000	41274	NIDCR Special Grants Review Committee[DSR]	9643906	3	ANATOMY/CELL BIOLOGY	42250712	GM1XX56LEP58	42250712	GM1XX56LEP58	US	39.953462	-75.193983	6463801	U OF PENNSYLVANIA		Elite	female	99	PHILADELPHIA	PA	SCHOOLS OF DENTISTRY/ORAL HYGN	191046205	UNITED STATES	N	41000	41274	121	Other Research-Related	2012	77147	NIDCR	77147	coastal
NICHD	8217156	40955	PA-10-063	5K99HD061689-02	5	K99	HD	61689	2		MANN KOEPKE, KATHY M	40575	41486	Biobehavioral and Behavioral Sciences Study Section[CHHD-H]	9638286	18	PSYCHOLOGY	36837920	QKWEF8XLMTT3	36837920	QKWEF8XLMTT3	US	29.718091	-95.336483	1449402	U OF HOUSTON		Non_Elite	female	96	HOUSTON	TX	SCHOOLS OF ARTS AND SCIENCES	772042610	UNITED STATES	N	40940	41486	865	Other Research-Related	2012	107942	NICHD	107942	coastal
NICHD	8217144	40956	PA-10-063	5K99HD064795-02	5	K99	HD	64795	2		MAHOLMES, VALERIE	40575	41140	Biobehavioral and Behavioral Sciences Study Section[CHHD-H]	7893131	9	PSYCHOLOGY	6046700	YH86RTW2YVJ4	6046700	YH86RTW2YVJ4	US	39.172055	-86.523157	577805	TRUSTEES OF INDIANA U		Non_Elite	female	98	BLOOMINGTON	IN	SCHOOLS OF ARTS AND SCIENCES	474013654	UNITED STATES	N	40940	41140	865	Other Research-Related	2012	82314	NICHD	82314	coastal
NIMH	8204719	40962	PA-10-063	5K99MH092431-02	5	K99	MH	92431	2		ANDERSON, KATHLEEN C	40544	41274	ZMH1-ERB-L(05)	8176961	3	PSYCHIATRY	47120084	TX2DAGQPENZ5	47120084	TX2DAGQPENZ5	US	38.543366	-121.72946	577503	U OF CALIFORNIA AT DAVIS		Non_Elite	female	98	DAVIS	CA	SCHOOLS OF MEDICINE	956186153	UNITED STATES	N	40909	41274	281	Other Research-Related	2012	87899	NIMH	87899	coastal
NIMH	8232026	40968	PA-10-063	5K99MH092321-02	5	K99	MH	92321	2		DESMOND, NANCY L	40603	41333	ZMH1-ERB-L(05)	7689587	49	Unavailable	781613492	PHZJFZ32NKH4	781613492	PHZJFZ32NKH4	US	32.903062	-117.243592	7375802	SCRIPPS RES INST THE		Non_Elite	female	97	LA JOLLA	CA	Other Domestic Non-Profits	920371000	UNITED STATES	N	40969	41333	281	Other Research-Related	2012	89100	NIMH	89100	coastal
NIBIB	8241054	40969	PA-10-063	5K99EB009106-02	5	K99	EB	9106	2		ERIM, ZEYNEP	40617	41670	ZEB1-OSR-C(O1)	9333724	5	RADIATION-DIAGNOSTIC/ONCOLOGY	965717143	GTNBNWXJ12D5	965717143	DWH7MSXKA2A8; GTNBNWXJ12D5	US	36.143381	-86.803365	8721001	VANDERBILT U		Non_Elite	female	98	Nashville	TN	SCHOOLS OF MEDICINE	372032408	UNITED STATES	N	40969	41670	286	Other Research-Related	2012	90072	NIBIB	90072	coastal
NIMH	8235843	40976	PA-10-063	5K99MH093459-02	5	K99	MH	93459	2		DESMOND, NANCY L	40606	41152	ZMH1-ERB-L(01)	10506670	7	PSYCHIATRY	5436803	KG76WYENL5K1	5436803	KG76WYENL5K1	US	42.050479	-87.680046	6144650	NORTHWESTERN U		Elite	female	98	CHICAGO	IL	SCHOOLS OF MEDICINE	606114579	UNITED STATES	N	40969	41152	281	Other Research-Related	2012	88625	NIMH	88625	coastal
NIDA	8248182	40987	PA-10-063	5K99DA031243-02	5	K99	DA	31243	2		LIN, YU	40634	41364	Career Development Education and Training Study Section[NIDA-K]	10522235	33	PSYCHIATRY	92530369	RN64EPNH8JC6	92530369	RN64EPNH8JC6	US	34.070199	-118.45102	577505	U OF CALIFORNIA LOS ANGELES		Elite	female	100	LOS ANGELES	CA	SCHOOLS OF MEDICINE	900952000	UNITED STATES	N	41000	41364	279	Other Research-Related	2012	158544	NIDA	158544	coastal
NIDA	8265846	40994	PA-10-063	5K99DA029565-02	5	K99	DA	29565	2		LIN, YU	40634	41090	Career Development Education and Training Study Section[NIDA-K]	8914723	5	VETERINARY SCIENCES	41485301	XRJSGX384TD6	41485301	XRJSGX384TD6	US	46.728892	-117.155742	9082001	WASHINGTON STATE U		Non_Elite	female	77	PULLMAN	WA	SCHOOLS OF VETERINARY MEDICINE	991641060	UNITED STATES	N	41000	41090	279	Other Research-Related	2012	121867	NIDA	121867	coastal
NICHD	8259145	40995	PA-10-063	5K99HD067220-02	5	K99	HD	67220	2		RAVINDRANATH, NEELAKANTA	40653	41029	Developmental Biology Study Section[CHHD-C]	10364455	5	MICROBIOLOGY/IMMUN/VIROLOGY	82359691	LN53LCFJFL45	82359691	LN53LCFJFL45	US	42.369697	-71.11193	3212901	HARVARD U		Elite	female	98	CAMBRIDGE	MA	SCHOOLS OF ARTS AND SCIENCES	21385369	UNITED STATES	N	41000	41029	865	Other Research-Related	2012	7679	NICHD	7679	coastal
NIDCR	8261680	40996	PA-10-063	5K99DE021068-02	5	K99	DE	21068	2		FRIEDEN, LESLIE A	40662	42185	NIDCR Special Grants Review Committee[DSR]	10228738	7	ANATOMY/CELL BIOLOGY	1910777	FTMTDMBR29C7	1910777	FTMTDMBR29C7	US	39.325256	-76.605131	4134401	JOHNS HOPKINS U		Elite	female	73	BALTIMORE	MD	SCHOOLS OF MEDICINE	212182680	UNITED STATES	N	41000	42185	121	Other Research-Related	2012	79039	NIDCR	79039	#N/A
NHLBI	8249060	40998	PA-10-063	5K99HL103722-02	5	K99	HL	103722	2		CARLSON, DREW E	40634	41547	ZHL1-CSR-Z(F2)	10211211	3	ANATOMY/CELL BIOLOGY	47120084	TX2DAGQPENZ5	47120084	TX2DAGQPENZ5	US	38.543366	-121.72946	577503	U OF CALIFORNIA AT DAVIS		Non_Elite	female	98	DAVIS	CA	SCHOOLS OF MEDICINE	956186153	UNITED STATES	N	41000	41547	837	Other Research-Related	2012	96903	NHLBI	96903	coastal
NIGMS	8248751	40998	PA-10-063	5K99GM097188-02	5	K99	GM	97188	2		HAMLET, MICHELLE R	40634	41182	ZGM1-BRT-9(KR)	9297952	4	INTERNAL MEDICINE/MEDICINE	44387793	TP7EK8DZV6N5	44387793	TP7EK8DZV6N5	US	36.007766	-78.926475	2221101	DUKE U		Elite	female	98	DURHAM	NC	SCHOOLS OF MEDICINE	277054673	UNITED STATES	N	41000	41182	859	Other Research-Related	2012	42584	NIGMS	42584	#N/A
NEI	8249370	41002	PA-10-063	5K99EY020569-02	5	K99	EY	20569	2		STEINMETZ, MICHAEL A	40634	41094	ZEY1-VSN(10)	10027908	49	Unavailable	78731668	NNJ6BMBTFGN5	78731668	NNJ6BMBTFGN5	US	32.8863	-117.243929	7210001	SALK INST FOR BIOLOGICAL STUDIES		Non_Elite	female	100	La Jolla	CA	Research Institutes	920371002	UNITED STATES	N	41000	41094	867	Other Research-Related	2012	44837	NEI	44837	coastal
NIGMS	8242048	41008	PA-10-063	5K99GM097095-02	5	K99	GM	97095	2		OKITA, RICHARD T	40634	41121	ZGM1-BRT-9(KR)	9643858	12	Unavailable	64931884	KUKXRCZ6NZC2	64931884	KUKXRCZ6NZC2	US	40.764045	-73.956024	5079202	SLOAN KETTERING INST CAN RES		Non_Elite	female	98	NEW YORK	NY	Research Institutes	100656007	UNITED STATES	N	41000	41121	859	Other Research-Related	2012	30000	NIGMS	30000	coastal
NHLBI	8249849	41012	PA-10-063	5K99HL107674-02	5	K99	HL	107674	2		CARLSON, DREW E	40634	41104	ZHL1-CSR-Z(F2)	8969790	33	ANESTHESIOLOGY	92530369	RN64EPNH8JC6	92530369	RN64EPNH8JC6	US	34.070199	-118.45102	577505	U OF CALIFORNIA LOS ANGELES		Elite	female	98	LOS ANGELES	CA	SCHOOLS OF MEDICINE	900952000	UNITED STATES	N	41015	41104	837	Other Research-Related	2012	103140	NHLBI	103140	coastal
NIAID	8351296	41012	PA-11-197	1K99AI100896-01	1	K99	AI	100896	1		DUNCAN, RORY A	41122	41851	Microbiology and Infectious Diseases B Research Study Section[MID-B]	10098762	12	MICROBIOLOGY/IMMUN/VIROLOGY	94878337	KMH5K9V7S518	94878337	KMH5K9V7S518	US	37.767442	-122.413937	577508	U OF CALIFORNIA SAN FRANCISCO		Elite	female	100	SAN FRANCISCO	CA	SCHOOLS OF MEDICINE	941432510	UNITED STATES	N	41122	41851	855	Other Research-Related	2012	126630	NIAID	126630	coastal
NICHD	8257957	41016	PA-10-063	5K99HD062841-02	5	K99	HD	62841	2		ILEKIS, JOHN V	40664	41394	Obstetrics and Maternal-Fetal Biology Study Section[CHHD-B]	9439691	3	INTERNAL MEDICINE/MEDICINE	96997515	NPSNT86JKN51	96997515	NPSNT86JKN51	US	45.49882	-122.685647	6297007	OREGON HEALTH & SCI U		Non_Elite	female	90	PORTLAND	OR	SCHOOLS OF MEDICINE	972393098	UNITED STATES	N	41030	41394	865	Other Research-Related	2012	81185	NICHD	81185	coastal
NINDS	8259140	41017	PA-10-063	5K99NS070821-02	5	K99	NS	70821	2		FUREMAN, BRANDY E	40664	41213	NST-2 Study Section [NST-2]	8855758	18	INTERNAL MEDICINE/MEDICINE	9214214	HJD6G4D6TJY5	9214214	HJD6G4D6TJY5	US	37.426852	-122.17047	8046501	STANFORD U		Elite	female	98	STANFORD	CA	SCHOOLS OF MEDICINE	943052004	UNITED STATES	N	41030	41213	853	Other Research-Related	2012	87264	NINDS	87264	#N/A
NIDDK	8289614	41023	PA-10-063	5K99DK087923-03	5	K99	DK	87923	3		BISHOP, TERRY ROGERS	40725	41243	Kidney, Urologic and Hematologic Diseases D Study Section[DDK-D]	10031071	7	INTERNAL MEDICINE/MEDICINE	605799469	HD1WMN6945W6	605799469	HD1WMN6945W6	US	47.660307	-122.315168	9087701	U OF WASHINGTON		Elite	female	98	SEATTLE	WA	SCHOOLS OF MEDICINE	981959472	UNITED STATES	N	41030	41243	847	Other Research-Related	2012	90000	NIDDK	90000	coastal
NIAID	8353272	41024	PA-11-197	1K99AI101167-01	1	K99	AI	101167	1		MCGUGAN, GLEN C	41030	41394	Microbiology and Infectious Diseases Advisory Committee[MID]	11127740	10	PUBLIC HEALTH & PREV MEDICINE	4315578	NMJHD63STRC5	4315578	NMJHD63STRC5	US	33.931173	-83.378873	676602	U OF GEORGIA		Non_Elite	female	98	ATHENS	GA	ORGANIZED RESEARCH UNITS	306021589	UNITED STATES	N	41030	41394	855	Other Research-Related	2012	91193	NIAID	91193	coastal
NIMH	8261679	41030	PA-10-063	5K99MH093567-02	5	K99	MH	93567	2		DESMOND, NANCY L	40664	41759	ZMH1-ERB-L(01)	10287508	49	Unavailable	78731668	NNJ6BMBTFGN5	78731668	NNJ6BMBTFGN5	US	32.8863	-117.243929	7210001	SALK INST FOR BIOLOGICAL STUDIES		Non_Elite	female	98	La Jolla	CA	Research Institutes	920371002	UNITED STATES	N	41030	41759	281	Other Research-Related	2012	87480	NIMH	87480	coastal
NIAID	8382892	41036	PA-11-197	1K99AI097286-01A1	1	K99	AI	97286	1	A	PROGRAIS, LAWRENCE J	41039	41394	Allergy, Immunology, and Transplantation Research Committee[AITC]	10826866	52	BIOLOGY	804355790	UYTTZT6G9DT1	804355790	UYTTZT6G9DT1	US	32.876991	-117.24087	577507	U OF CALIFORNIA SAN DIEGO		Elite	female	97	LA JOLLA	CA	SCHOOLS OF ARTS AND SCIENCES	920930621	UNITED STATES	N	41039	41394	855	Other Research-Related	2012	90000	NIAID	90000	coastal
NIEHS	8277270	41051	PA-10-063	5K99ES019881-02	5	K99	ES	19881	2		SHREFFLER, CAROL A	40695	41425	Environmental Health Sciences Review Committee[EHS(CA)]	9509976	12	OBSTETRICS & GYNECOLOGY	94878337	KMH5K9V7S518	94878337	KMH5K9V7S518	US	37.767442	-122.413937	577508	U OF CALIFORNIA SAN FRANCISCO		Elite	female	69	SAN FRANCISCO	CA	SCHOOLS OF MEDICINE	941432510	UNITED STATES	N	41061	41425	113	Other Research-Related	2012	90000	NIEHS	90000	coastal
NINDS	8263409	41053	PA-10-063	5K99NS075216-02	5	K99	NS	75216	2		GUBITZ, AMELIE	40695	41517	NST-2 Study Section [NST-2]	9884220	52	Unavailable	627922248	ESJQL5U9JYM3	627922248	ESJQL5U9JYM3	US	32.875761	-117.239541	2384603	LUDWIG INST FOR CANCER RES LTD		Non_Elite	female	96	LA JOLLA	CA	Research Institutes	920930660	UNITED STATES	N	41061	41517	853	Other Research-Related	2012	91044	NINDS	91044	coastal
NHLBI	8301583	41058	PA-10-063	5K99HL109162-02	5	K99	HL	109162	2		TIGNO, XENIA	40739	41790	ZHL1-CSR-Z(M1)	10329267	7	Unavailable	30811269	QN6MS4VN7BD1	30811269	QN6MS4VN7BD1	US	42.336107	-71.107481	1080401	BRIGHAM AND WOMENS HOSP		Elite	female	98	BOSTON	MA	Independent Hospitals	21156110	UNITED STATES	N	41061	41790	837	Other Research-Related	2012	137160	NHLBI	137160	coastal
NINR	8279168	41071	PA-10-063	5K99NR012773-02	5	K99	NR	12773	2		HUSS, KAREN	40725	41274	Nursing Science Review Committee[NRRC(49)]	10432618	12	OTHER HEALTH PROFESSIONS	94878337	KMH5K9V7S518	94878337	KMH5K9V7S518	US	37.767442	-122.413937	577508	U OF CALIFORNIA SAN FRANCISCO		Elite	female	98	SAN FRANCISCO	CA	SCHOOLS OF NURSING	941432510	UNITED STATES	N	41091	41274	361	Other Research-Related	2012	87750	NINR	87750	coastal
NICHD	8298972	41072	PA-10-063	5K99HD065832-02	5	K99	HD	65832	2		MILLER, BRETT	40732	41455	Biobehavioral and Behavioral Sciences Study Section[CHHD-H]	8027298	33	NEUROLOGY	92530369	RN64EPNH8JC6	92530369	RN64EPNH8JC6	US	34.070199	-118.45102	577505	U OF CALIFORNIA LOS ANGELES		Elite	female	93	LOS ANGELES	CA	SCHOOLS OF MEDICINE	900952000	UNITED STATES	N	41091	41455	865	Other Research-Related	2012	86028	NICHD	86028	#N/A
NHLBI	8306029	41078	PA-10-063	5K99HL109133-02	5	K99	HL	109133	2		SCOTT, JANE	40725	41759	ZHL1-CSR-Z(M1)	8722421	13	PHYSIOLOGY	621889815	QHF5ZZ114M72	621889815	QHF5ZZ114M72	US	40.8415	-73.9414	1833205	COLUMBIA U HEALTH SCI		Elite	female	98	NEW YORK	NY	SCHOOLS OF MEDICINE	100323725	UNITED STATES	N	41091	41759	837	Other Research-Related	2012	133839	NHLBI	133839	coastal
NIDCR	8309920	41085	PA-10-063	5K99DE021461-02	5	K99	DE	21461	2		FRIEDEN, LESLIE A	40756	41851	NIDCR Special Grants Review Committee[DSR]	8963743	7	ANATOMY/CELL BIOLOGY	1910777	FTMTDMBR29C7	1910777	FTMTDMBR29C7	US	39.325256	-76.605131	4134401	JOHNS HOPKINS U		Elite	female	99	BALTIMORE	MD	SCHOOLS OF MEDICINE	212182680	UNITED STATES	N	41122	41851	121	Other Research-Related	2012	73947	NIDCR	73947	coastal
NHLBI	8309178	41088	PA-10-063	5K99HL109247-02	5	K99	HL	109247	2		KAUFMANN, PETER G	40756	41455	ZHL1-CSR-Z(M1)	10582344	12	PSYCHIATRY	94878337	KMH5K9V7S518	94878337	KMH5K9V7S518	US	37.767442	-122.413937	577508	U OF CALIFORNIA SAN FRANCISCO		Elite	female	74	SAN FRANCISCO	CA	SCHOOLS OF MEDICINE	941432510	UNITED STATES	N	41091	41455	837	Other Research-Related	2012	127440	NHLBI	127440	#N/A
NICHD	8322601	41089	PA-10-063	5K99HD067587-02	5	K99	HD	67587	2		CLARK, REBECCA L	40787	41172	Population Sciences Study Section[CHHD-W]	10288899	4	PUBLIC HEALTH & PREV MEDICINE	608195277	D3LHU66KBLD5	608195277	D3LHU66KBLD5	US	35.9316	-79.057377	578206	U OF NORTH CAROLINA CHAPEL HILL		Elite	female	98	CHAPEL HILL	NC	SCHOOLS OF PUBLIC HEALTH	275995023	UNITED STATES	N	41091	41172	865	Other Research-Related	2012	74664	NICHD	74664	coastal
NCI	8294708	41093	PA-10-063	5K99CA160351-02	5	K99	CA	160351	2		SCHMIDT, MICHAEL K	40725	41305	Institutional Training and Education Study Section (F)[NCI-F]	8950940	7	Unavailable	76580745	DPMGH9MG1X67	76580745	DPMGH9MG1X67	US	42.337593	-71.108279	1464901	DANA FARBER CANCER INST		Elite	female	58	BOSTON	MA	Independent Hospitals	22155450	UNITED STATES	N	41091	41305	398	Other Research-Related	2012	135216	NCI	135216	coastal
NCI	8300831	41094	PA-10-063	5K99CA151670-02	5	K99	CA	151670	2		SCHMIDT, MICHAEL K	40739	41820	Institutional Training and Education Study Section (F)[NCI-F]	9886789	3	INTERNAL MEDICINE/MEDICINE	96997515	NPSNT86JKN51	96997515	NPSNT86JKN51	US	45.49882	-122.685647	6297007	OREGON HEALTH & SCI U	1238	Non_Elite	female	98	PORTLAND	OR	SCHOOLS OF MEDICINE	972393098	UNITED STATES	N	41091	41820	398	Other Research-Related	2012	141480	NCI	141480	coastal
NIA	8316123	41103	PA-10-063	5K99AG039512-02	5	K99	AG	39512	2		MURTHY, MAHADEV	40770	41486	Biological Aging Study Section[NIA-B]	10376640	8	Unavailable	73130411	FLJ7DQKLL226	73130411	FLJ7DQKLL226	US	42.363198	-71.068772	4907701	MASSACHUSETTS GENERAL HOSP		Elite	female	74	BOSTON	MA	Independent Hospitals	21142621	UNITED STATES	N	41122	41486	866	Other Research-Related	2012	90487	NIA	90487	coastal
NHLBI	8299478	41106	PA-10-063	5K99HL105663-02	5	K99	HL	105663	2		TIGNO, XENIA	40739	41517	ZHL1-CSR-Z(M1)	8774163	7	Unavailable	30811269	QN6MS4VN7BD1	30811269	QN6MS4VN7BD1	US	42.336107	-71.107481	1080401	BRIGHAM AND WOMENS HOSP		Elite	female	99	BOSTON	MA	Independent Hospitals	21156110	UNITED STATES	N	41091	41517	838	Other Research-Related	2012	137317	NHLBI	137317	coastal
NICHD	8320053	41108	PA-10-063	5K99HD069516-02	5	K99	HD	69516	2		HAVERKOS, LYNNE	40770	41486	Health, Behavior, and Context Study Section[CHHD-M]	7895814	8	Unavailable	144676566	UYLKBRENAPG5	144676566	UYLKBRENAPG5	US	39.030151	-77.137205	1809301	HENRY M JACKSON FDN FOR THE ADV MIL/MED		Non_Elite	female	97	BETHESDA	MD	Research Institutes	208171888	UNITED STATES	N	41122	41486	865	Other Research-Related	2012	123828	NICHD	123828	coastal
NIEHS	8306729	41110	PA-10-063	5K99ES019919-02	5	K99	ES	19919	2		SHREFFLER, CAROL A	40756	41305	Environmental Health Sciences Review Committee[EHS(CA)]	10499412	13	PUBLIC HEALTH & PREV MEDICINE	78861598	C8H9CNG1VBD9	78861598	C8H9CNG1VBD9	US	40.790284	-73.946781	3839801	ICAHN SCH OF MED AT MOUNT SINAI		Non_Elite	female	61	NEW YORK	NY	SCHOOLS OF MEDICINE	100296574	UNITED STATES	N	41122	41305	113	Other Research-Related	2012	98969	NIEHS	98969	coastal
NHGRI	8354539	41113	PA-11-197	1K99HG006860-01	1	K99	HG	6860	1		PAZIN, MICHAEL J	41113	41638	Genome Research Study Section[GNOM-G]	9886760	13	MISCELLANEOUS	124726725	GS3YEVSS12N6	124726725	GS3YEVSS12N6	US	37.870017	-122.268624	577502	U OF CALIFORNIA BERKELEY		Elite	female	96	BERKELEY	CA	ORGANIZED RESEARCH UNITS	947101749	UNITED STATES	N	41113	41638	172	Other Research-Related	2012	103198	NHGRI	103198	#N/A
NIDCD	8320884	41115	PA-10-063	5K99DC011282-02	5	K99	DC	11282	2		SKLARE, DAN	40787	41517	Communication Disorders Review Committee[CDRC]	10328359	7	Unavailable	48682157	SZ32VTCXM799	48682157	SZ32VTCXM799	US	47.66243	-122.282291	1531401	SEATTLE CHILDRENS HOSP		Non_Elite	female	97	SEATTLE	WA	Independent Hospitals	981053901	UNITED STATES	N	41153	41517	173	Other Research-Related	2012	102502	NIDCD	102502	#N/A
NIA	8324513	41116	PA-10-063	5K99AG037573-02	5	K99	AG	37573	2		HSIAO, JOHN	40787	41517	Basic Neuroscience of Aging Study Section[NIA-N]	9839461	1	Unavailable	6471700	Y2K4F9RPRRG7	6471700	Y2K4F9RPRRG7	US	44.02432	-92.46011	4976101	MAYO CLINIC ROCHESTER		Non_Elite	female	98	ROCHESTER	MN	Other Domestic Non-Profits	559050001	UNITED STATES	N	41153	41517	866	Other Research-Related	2012	87980	NIA	87980	coastal
NCI	8303241	41120	PA-10-063	5K99CA157945-02	5	K99	CA	157945	2		SCHMIDT, MICHAEL K	40756	41698	Institutional Training and Education Study Section (F)[NCI-F]	10368985	7	Unavailable	71723621	C1CPANL3EWK4	71723621	C1CPANL3EWK4	US	42.33982	-71.10568	758101	BETH ISRAEL DEACONESS MED CTR		Elite	female	55	BOSTON	MA	Independent Hospitals	22155400	UNITED STATES	N	41122	41698	398	Other Research-Related	2012	169128	NCI	169128	#N/A
NCI	8320132	41122	PA-10-063	5K99CA154889-02	5	K99	CA	154889	2		SCHMIDT, MICHAEL K	40770	41213	Institutional Training and Education Study Section (F)[NCI-F]	6415205	7	BIOCHEMISTRY	1910777	FTMTDMBR29C7	1910777	FTMTDMBR29C7	US	39.325256	-76.605131	4134401	JOHNS HOPKINS U		Elite	female	96	BALTIMORE	MD	SCHOOLS OF MEDICINE	212182680	UNITED STATES	N	41122	41213	398	Other Research-Related	2012	134838	NCI	134838	coastal
NICHD	8306221	41124	PA-10-063	5K99HD067342-02	5	K99	HD	67342	2		ILEKIS, JOHN V	40756	41511	Obstetrics and Maternal-Fetal Biology Study Section[CHHD-B]	6160980	2	PHARMACOLOGY	146515460	WLDGTNCFFJZ3	146515460	WLDGTNCFFJZ3	US	39.545077	-119.818277	829903	U OF NEVADA RENO		Non_Elite	female	99	RENO	NV	SCHOOLS OF MEDICINE	89557	UNITED STATES	N	41122	41511	865	Other Research-Related	2012	107924	NICHD	107924	coastal
NINDS	8337282	41124	PA-10-063	5K99NS076524-02	5	K99	NS	76524	2		SIEBER, BETH-ANNE	40816	41257	NST-2 Study Section [NST-2]	9530640	12	Unavailable	99992430	KH6NJ6ND8737	99992430	KH6NJ6ND8737	US	37.767618	-122.394315	1567601	J DAVID GLADSTONE INSTS		Non_Elite	female	80	SAN FRANCISCO	CA	Research Institutes	941582261	UNITED STATES	N	41153	41257	853	Other Research-Related	2012	93420	NINDS	93420	coastal
NIDDK	8281291	41127	PA-11-197	1K99DK094981-01	1	K99	DK	94981	1		MARGOLIS, RONALD N	41136	41364	Diabetes, Endocrinology and Metabolic Diseases B Study Section[DDK-B]	10941578	52	INTERNAL MEDICINE/MEDICINE	804355790	UYTTZT6G9DT1	804355790	UYTTZT6G9DT1	US	32.876991	-117.24087	577507	U OF CALIFORNIA SAN DIEGO		Elite	female	67	LA JOLLA	CA	SCHOOLS OF MEDICINE	920930621	UNITED STATES	N	41136	41364	847	Other Research-Related	2012	90000	NIDDK	90000	coastal
NCI	8279527	41128	PA-11-197	1K99CA166729-01	1	K99	CA	166729	1		SCHMIDT, MICHAEL K	41129	41425	Institutional Training and Education Study Section (F)[NCI-F]	9289180	8	Unavailable	73130411	FLJ7DQKLL226	73130411	FLJ7DQKLL226	US	42.363198	-71.068772	4907701	MASSACHUSETTS GENERAL HOSP		Elite	female	98	BOSTON	MA	Independent Hospitals	21142621	UNITED STATES	N	41129	41425	398	Other Research-Related	2012	128574	NCI	128574	coastal
NIA	8324514	41129	PA-10-063	5K99AG040184-02	5	K99	AG	40184	2		MILLER, MARILYN	40787	41517	Basic Neuroscience of Aging Study Section[NIA-N]	9497902	7	INTERNAL MEDICINE/MEDICINE	605799469	HD1WMN6945W6	605799469	HD1WMN6945W6	US	47.660307	-122.315168	9087701	U OF WASHINGTON		Elite	female	99	SEATTLE	WA	SCHOOLS OF MEDICINE	981959472	UNITED STATES	N	41153	41517	866	Other Research-Related	2012	89856	NIA	89856	coastal
NICHD	8325578	41129	PA-10-063	5K99HD069533-02	5	K99	HD	69533	2		JAVOIS, LORETTE CLAIRE	40787	41213	Developmental Biology Study Section[CHHD-C]	6431500	7	GENETICS	47006379	JDLVAVGYJQ21	47006379	JDLVAVGYJQ21	US	42.335672	-71.104237	3212902	HARVARD MED SCH		Elite	female	98	BOSTON	MA	SCHOOLS OF MEDICINE	21201616	UNITED STATES	N	41153	41213	865	Other Research-Related	2012	87520	NICHD	87520	coastal
NIA	8334072	41134	PA-10-063	5K99AG040149-03	5	K99	AG	40149	3		FULDNER, REBECCA A	40816	41517	Biological Aging Study Section[NIA-B]	9884345	10	BIOMEDICAL ENGINEERING	170230239	V6AFQPN18437	170230239	V6AFQPN18437	US	30.291188	-97.737568	578403	U OF TEXAS AT AUSTIN		Non_Elite	female	74	AUSTIN	TX	BIOMED ENGR/COL ENGR/ENGR STA	787121139	UNITED STATES	N	41153	41517	866	Other Research-Related	2012	133191	NIA	133191	coastal
NCI	8354071	41135	PA-11-197	1K99CA168987-01	1	K99	CA	168987	1		SCHMIDT, MICHAEL K	41153	41639	Institutional Training and Education Study Section (F)[NCI-F]	11104857	18	BIOCHEMISTRY	9214214	HJD6G4D6TJY5	9214214	HJD6G4D6TJY5	US	37.426852	-122.17047	8046501	STANFORD U		Elite	female	97	STANFORD	CA	SCHOOLS OF MEDICINE	943052004	UNITED STATES	N	41153	41639	398	Other Research-Related	2012	110132	NCI	110132	coastal
NIAAA	8334678	41135	PA-10-063	5K99AA019974-02	5	K99	AA	19974	2		FREEMAN, ROBERT	40806	41517	Epidemiology, Prevention and Behavior Research Study Section[AA-2]	8517080	4	PSYCHOLOGY	153890272	SZPJL5ZRCLF4	153890272	SZPJL5ZRCLF4	US	38.948231	-92.327335	578002	U OF MISSOURI COLUMBIA		Non_Elite	female	98	COLUMBIA	MO	SCHOOLS OF ARTS AND SCIENCES	652110001	UNITED STATES	N	41153	41517	273	Other Research-Related	2012	121841	NIAAA	121841	coastal
NIDDK	8332119	41136	PA-10-063	5K99DK093724-02	5	K99	DK	93724	2		HYDE, JAMES F	40801	41486	Diabetes, Endocrinology and Metabolic Diseases B Study Section[DDK-B]	10803525	14	INTERNAL MEDICINE/MEDICINE	110521739		110521739		US	40.85103	-73.844379	9433501	ALBERT EINSTEIN COLL OF MED		Non_Elite	female	92	BRONX	NY	SCHOOLS OF MEDICINE	104611900	UNITED STATES	N	41122	41486	847	Other Research-Related	2012	87944	NIDDK	87944	coastal
NLM	8354440	41138	PA-11-197	1K99LM011392-01	1	K99	LM	11392	1		SIM, HUA-CHUAN	41153	41517	Biomedical Informatics, Library and Data Sciences Review Committee[BLR]	10960996	52	INTERNAL MEDICINE/MEDICINE	804355790	UYTTZT6G9DT1	804355790	UYTTZT6G9DT1	US	32.876991	-117.24087	577507	U OF CALIFORNIA SAN DIEGO		Elite	female	79	LA JOLLA	CA	SCHOOLS OF MEDICINE	920930621	UNITED STATES	N	41153	41517	879	Other Research-Related	2012	75510	NLM	75510	#N/A
NCI	8328713	41142	PA-10-063	5K99CA158009-02	5	K99	CA	158009	2		SCHMIDT, MICHAEL K	40791	41517	ZCA1-RTRB-K(M1)	8476980	3	BIOCHEMISTRY	57588857	E1KJM4T54MK6	57588857	E1KJM4T54MK6	US	38.215024	-85.760145	4679701	U OF LOUISVILLE		Non_Elite	female	98	LOUISVILLE	KY	SCHOOLS OF MEDICINE	402920001	UNITED STATES	N	41153	41517	398	Other Research-Related	2012	87912	NCI	87912	#N/A
NCI	8334549	41144	PA-10-063	5K99CA157950-02	5	K99	CA	157950	2		SCHMIDT, MICHAEL K	40805	41882	Institutional Training and Education Study Section (F)[NCI-F]	9295103	12	PEDIATRICS	94878337	KMH5K9V7S518	94878337	KMH5K9V7S518	US	37.767442	-122.413937	577508	U OF CALIFORNIA SAN FRANCISCO		Elite	female	98	SAN FRANCISCO	CA	SCHOOLS OF MEDICINE	941432510	UNITED STATES	N	41153	41882	398	Other Research-Related	2012	149216	NCI	149216	#N/A
NICHD	8337292	41145	PA-10-063	5K99HD067293-02	5	K99	HD	67293	2		COULOMBE, JAMES N	40812	41517	Developmental Biology Study Section[CHHD-C]	10331811	13	BIOCHEMISTRY	124726725	GS3YEVSS12N6	124726725	GS3YEVSS12N6	US	37.870017	-122.268624	577502	U OF CALIFORNIA BERKELEY		Elite	female	98	BERKELEY	CA	SCHOOLS OF ARTS AND SCIENCES	947101749	UNITED STATES	N	41153	41517	865	Other Research-Related	2012	95400	NICHD	95400	coastal
NCI	8281227	41148	PA-11-197	1K99CA166527-01	1	K99	CA	166527	1		SCHMIDT, MICHAEL K	41153	41333	Institutional Training and Education Study Section (F)[NCI-F]	10941662	52	INTERNAL MEDICINE/MEDICINE	804355790	UYTTZT6G9DT1	804355790	UYTTZT6G9DT1	US	32.876991	-117.24087	577507	U OF CALIFORNIA SAN DIEGO		Elite	female	77	LA JOLLA	CA	SCHOOLS OF MEDICINE	920930621	UNITED STATES	N	41153	41333	398	Other Research-Related	2012	140252	NCI	140252	coastal
NIEHS	8327189	41149	PA-10-063	5K99ES020364-02	5	K99	ES	20364	2		SHREFFLER, CAROL A	40787	41517	ZES1-LKB-J(K9)	6997547	13	PUBLIC HEALTH & PREV MEDICINE	621889815	QHF5ZZ114M72	621889815	QHF5ZZ114M72	US	40.8415	-73.9414	1833205	COLUMBIA U HEALTH SCI		Elite	female	99	NEW YORK	NY	SCHOOLS OF PUBLIC HEALTH	100323725	UNITED STATES	N	41153	41517	113	Other Research-Related	2012	123097	NIEHS	123097	coastal
NLM	8279720	41151	PA-11-197	1K99LM011309-01	1	K99	LM	11309	1		VANBIERVLIET, ALAN	41153	41517	ZLM1-ZH-C(01)	10803498	2	ENGINEERING (ALL TYPES)	62761671	Z1H9VJS8NG16	62761671	Z1H9VJS8NG16	US	41.664405	-91.542152	3972901	U OF IOWA		Non_Elite	female	96	IOWA CITY	IA	BIOMED ENGR/COL ENGR/ENGR STA	522421320	UNITED STATES	N	41153	41517	879	Other Research-Related	2012	90000	NLM	90000	#N/A
NIGMS	8334665	41155	PA-10-063	5K99GM098393-02	5	K99	GM	98393	2		FLICKER, PAULA F	40816	41586	ZGM1-BRT-X(KR)	10369851	49	Unavailable	781613492	PHZJFZ32NKH4	781613492	PHZJFZ32NKH4	US	32.903062	-117.243592	7375802	SCRIPPS RES INST THE		Non_Elite	female	67	LA JOLLA	CA	Other Domestic Non-Profits	920371000	UNITED STATES	N	41153	41586	859	Other Research-Related	2012	88007	NIGMS	88007	coastal
NCI	8331545	41156	PA-10-063	5K99CA154605-02	5	K99	CA	154605	2		SCHMIDT, MICHAEL K	40798	41364	Institutional Training and Education Study Section (F)[NCI-F]	8300349	9	ANATOMY/CELL BIOLOGY	51113330	FXKMA43NTV21	51113330	FXKMA43NTV21	US	29.70926	-95.400851	481201	BAYLOR COLL OF MED		Non_Elite	female	99	HOUSTON	TX	SCHOOLS OF MEDICINE	770303411	UNITED STATES	N	41153	41364	398	Other Research-Related	2012	158552	NCI	158552	coastal
NCI	8330963	41164	PA-10-063	5K99CA160349-02	5	K99	CA	160349	2		SCHMIDT, MICHAEL K	40795	41517	Institutional Training and Education Study Section (F)[NCI-F]	10658604	37	UROLOGY	72933393	G88KLJR3KYT5	72933393	G88KLJR3KYT5	US	34.017282	-118.281254	7636101	U OF SOUTHERN CALIFORNIA		Non_Elite	female	98	Los Angeles	CA	SCHOOLS OF MEDICINE	900894304	UNITED STATES	N	41165	41517	398	Other Research-Related	2012	138996	NCI	138996	coastal
NIDDK	8301550	41166	PA-10-063	5K99DK088962-02	5	K99	DK	88962	2		SERRANO, JOSE	40787	41517	Digestive Diseases and Nutrition C Study Section[DDK-C]	10199097	8	Unavailable	73130411	FLJ7DQKLL226	73130411	FLJ7DQKLL226	US	42.363198	-71.068772	4907701	MASSACHUSETTS GENERAL HOSP		Elite	female	93	BOSTON	MA	Independent Hospitals	21142621	UNITED STATES	N	41153	41517	847	Other Research-Related	2012	87389	NIDDK	87389	coastal
NCI	8300449	41171	PA-11-197	1K99CA160638-01A1	1	K99	CA	160638	1	A	SCHMIDT, MICHAEL K	41171	41608	Institutional Training and Education Study Section (F)[NCI-F]	8968196	1	INTERNAL MEDICINE/MEDICINE	5421136	ZUE9HKT2CLC9	5421136	ZUE9HKT2CLC9	US	41.789554	-87.601172	1413601	U OF CHICAGO		Elite	female	90	CHICAGO	IL	SCHOOLS OF MEDICINE	606372612	UNITED STATES	N	41171	41608	398	Other Research-Related	2012	133723	NCI	133723	coastal
NHLBI	8399062	41212	PA-10-063	5K99HL107642-02	5	K99	HL	107642	2		CARLSON, DREW E	40909	41658	ZHL1-CSR-P(O2)	10217223	7	Unavailable	30811269	QN6MS4VN7BD1	30811269	QN6MS4VN7BD1	US	42.336107	-71.107481	1080401	BRIGHAM AND WOMENS HOSP		Elite	female	98	BOSTON	MA	Independent Hospitals	21156110	UNITED STATES	N	41244	41658	837	Other Research-Related	2013	137970	NHLBI	137970	coastal
NIDCD	8396380	41235	PA-10-063	5K99DC012069-02	5	K99	DC	12069	2		SKLARE, DAN	40887	41882	Communication Disorders Review Committee[CDRC]	10289025	12	GENETICS	71037113	LHGDNJMZ64Y1	71037113	LHGDNJMZ64Y1	US	40.763746	-73.955386	7056601	ROCKEFELLER U		Non_Elite	female	99	NEW YORK	NY	GRADUATE SCHOOLS	100656399	UNITED STATES	N	41244	41882	173	Other Research-Related	2013	112284	NIDCD	112284	coastal
NIDCD	8401139	41236	PA-10-063	5K99DC012065-02	5	K99	DC	12065	2		SKLARE, DAN	40893	41608	Communication Disorders Review Committee[CDRC]	10793375	7	BIOLOGY	47006379	JDLVAVGYJQ21	47006379	JDLVAVGYJQ21	US	42.335672	-71.104237	3212902	HARVARD MED SCH		Elite	female	99	BOSTON	MA	SCHOOLS OF MEDICINE	21201616	UNITED STATES	N	41244	41608	173	Other Research-Related	2013	87402	NIDCD	87402	#N/A
NIDA	8413052	41253	PA-10-063	5K99DA032649-02	5	K99	DA	32649	2		SORENSEN, ROGER	40940	42004	Career Development Education and Training Study Section[NIDA-K]	10626246	7	ANATOMY/CELL BIOLOGY	188435911	Z9CRZKD42ZT1	188435911	Z9CRZKD42ZT1	US	39.292248	-76.625629	820104	U OF MARYLAND BALTIMORE		Non_Elite	female	98	BALTIMORE	MD	SCHOOLS OF MEDICINE	212011508	UNITED STATES	N	41275	42004	279	Other Research-Related	2013	144166	NIDA	144166	coastal
NHGRI	8403057	41253	PA-10-063	5K99HG006446-02	5	K99	HG	6446	2		MCEWEN, JEAN	40909	41698	Special Emphasis Panel[ZRG1-SEIR-B(01)Q]	10757985	3	INTERNAL MEDICINE/MEDICINE	42250712	GM1XX56LEP58	42250712	GM1XX56LEP58	US	39.953462	-75.193983	6463801	U OF PENNSYLVANIA		Elite	female	98	PHILADELPHIA	PA	SCHOOLS OF MEDICINE	191046205	UNITED STATES	N	41275	41698	172	Other Research-Related	2013	90000	NHGRI	90000	coastal
NIGMS	8417652	41267	PA-10-063	5K99GM100008-02	5	K99	GM	100008	2		GERRATANA, BARBARA	40941	41820	ZGM1-BRT-X(KR)	9830077	7	CHEMISTRY	1425594	E2NYLCDML6V1	1425594	E2NYLCDML6V1	US	42.359128	-71.093339	4911501	MASSACHUSETTS INST OF TECHNOLOGY		Elite	female	93	CAMBRIDGE	MA	SCHOOLS OF ARTS AND SCIENCES	21421029	UNITED STATES	N	41275	41820	859	Other Research-Related	2013	85510	NIGMS	85510	#N/A
NCI	8425810	41271	PA-11-197	1K99CA172697-01	1	K99	CA	172697	1		SCHMIDT, MICHAEL K	41275	41639	Transition to Independence Study Section (I)[NCI-I]	11264317	12	Unavailable	64931884	KUKXRCZ6NZC2	64931884	KUKXRCZ6NZC2	US	40.764045	-73.956024	5079202	SLOAN KETTERING INST CAN RES		Non_Elite	female	100	NEW YORK	NY	Research Institutes	100656007	UNITED STATES	N	41275	41639	398	Other Research-Related	2013	158535	NCI	158535	#N/A
NCI	8443166	41281	PA-11-197	1K99CA160786-01A1	1	K99	CA	160786	1	A	SCHMIDT, MICHAEL K	41281	41639	Transition to Independence Study Section (I)[NCI-I]	9289171	4	INTERNAL MEDICINE/MEDICINE	608195277	D3LHU66KBLD5	608195277	D3LHU66KBLD5	US	35.9316	-79.057377	578206	U OF NORTH CAROLINA CHAPEL HILL		Elite	female	99	CHAPEL HILL	NC	SCHOOLS OF MEDICINE	275995023	UNITED STATES	N	41281	41639	398	Other Research-Related	2013	82811	NCI	82811	coastal
NIGMS	8411980	41292	PA-10-063	5K99GM100013-02	5	K99	GM	100013	2		FLICKER, PAULA F	40940	41517	ZGM1-BRT-X(KR)	10419186	12	PHARMACOLOGY	94878337	KMH5K9V7S518	94878337	KMH5K9V7S518	US	37.767442	-122.413937	577508	U OF CALIFORNIA SAN FRANCISCO		Elite	female	98	SAN FRANCISCO	CA	SCHOOLS OF MEDICINE	941432510	UNITED STATES	N	41306	41517	859	Other Research-Related	2013	90000	NIGMS	90000	coastal
NIAAA	8422994	41295	PA-10-063	5K99AA020869-02	5	K99	AA	20869	2		WHITE, AARON	40949	41670	Epidemiology, Prevention and Behavior Research Study Section[AA-2]	10742432	7	PSYCHIATRY	605799469	HD1WMN6945W6	605799469	HD1WMN6945W6	US	47.660307	-122.315168	9087701	U OF WASHINGTON		Elite	female	92	SEATTLE	WA	SCHOOLS OF MEDICINE	981959472	UNITED STATES	N	41306	41670	273	Other Research-Related	2013	123974	NIAAA	123974	coastal
NHLBI	8473272	41296	PA-10-063	5K99HL111206-02	5	K99	HL	111206	2		CARLSON, DREW E	41061	41698	ZHL1-CSR-P(O2)	10098932	13	INTERNAL MEDICINE/MEDICINE	621889815	QHF5ZZ114M72	621889815	QHF5ZZ114M72	US	40.8415	-73.9414	1833205	COLUMBIA U HEALTH SCI		Elite	female	99	NEW YORK	NY	SCHOOLS OF MEDICINE	100323725	UNITED STATES	N	41334	41698	837	Other Research-Related	2013	133839	NHLBI	133839	coastal
NIMH	8420338	41300	PA-10-063	5K99MH095768-02	5	K99	MH	95768	2		DESMOND, NANCY L	40945	41670	ZMH1-ERB-L(05)	7075579	7	ANATOMY/CELL BIOLOGY	47006379	JDLVAVGYJQ21	47006379	JDLVAVGYJQ21	US	42.335672	-71.104237	3212902	HARVARD MED SCH		Elite	female	98	BOSTON	MA	SCHOOLS OF MEDICINE	21201616	UNITED STATES	N	41306	41670	242	Other Research-Related	2013	91044	NIMH	91044	#N/A
NHLBI	8490523	41305	PA-11-197	5K99HL109075-02	5	K99	HL	109075	2		CARLSON, DREW E	41061	41455	ZHL1-CSR-P(F1)	10637353	12	RADIATION-DIAGNOSTIC/ONCOLOGY	94878337	KMH5K9V7S518	94878337	KMH5K9V7S518	US	37.767442	-122.413937	577508	U OF CALIFORNIA SAN FRANCISCO		Elite	female	97	SAN FRANCISCO	CA	SCHOOLS OF MEDICINE	941432510	UNITED STATES	N	41334	41455	837	Other Research-Related	2013	86196	NHLBI	86196	#N/A
NICHD	8431734	41310	PA-10-063	5K99HD070953-02	5	K99	HD	70953	2		HAVERKOS, LYNNE	40969	41698	Health, Behavior, and Context Study Section[CHHD-M]	8648533	25	PSYCHIATRY	41294109	F27KDXZMF9Y8	41294109	F27KDXZMF9Y8	US	43.131774	-77.63546	7047101	U OF ROCHESTER		Non_Elite	female	97	ROCHESTER	NY	SCHOOL OF MEDICINE & DENTISTRY	146270140	UNITED STATES	N	41334	41698	865	Other Research-Related	2013	124821	NICHD	124821	coastal
NIGMS	8423691	41318	PA-10-063	5K99GM100011-02	5	K99	GM	100011	2		GERRATANA, BARBARA	40969	41455	ZGM1-BRT-X(KR)	7710965	7	BIOCHEMISTRY	160079455	EXZVPWZBLUE8	160079455	EXZVPWZBLUE8	US	42.050479	-87.680046	6144601	NORTHWESTERN U		Elite	female	96	Chicago	IL	SCHOOLS OF ARTS AND SCIENCES	606114579	UNITED STATES	N	41334	41455	859	Other Research-Related	2013	27518	NIGMS	27518	coastal
NICHD	8458892	41318	PA-10-063	5K99HD070874-02	5	K99	HD	70874	2		NEWCOMER, SUSAN	41015	41820	Population Sciences Study Section[CHHD-W]	9773886	14	SOCIAL SCIENCES	942514985	F4SLJ5WF59F6	942514985	F4SLJ5WF59F6	US	37.72091	-122.476074	513615	SAN FRANCISCO STATE U		Non_Elite	female	97	SAN FRANCISCO	CA	SCHOOLS OF ARTS AND SCIENCES	941321722	UNITED STATES	N	41306	41820	865	Other Research-Related	2013	87441	NICHD	87441	#N/A
NIDA	8435395	41319	PA-11-197	5K99DA031790-02	5	K99	DA	31790	2		LIN, YU	40969	41455	Career Development Education and Training Study Section[NIDA-K]	9437263	1	NEUROSCIENCES	183710748	NHV3GTWSALA7	183710748	NHV3GTWSALA7	US	32.786754	-79.947265	7575301	MED U OF SOUTH CAROLINA		Non_Elite	female	99	CHARLESTON	SC	SCHOOLS OF MEDICINE	294074636	UNITED STATES	N	41334	41455	279	Other Research-Related	2013	120228	NIDA	120228	coastal
NINDS	8431354	41325	PA-11-197	5K99NS078118-02	5	K99	NS	78118	2		WHITTEMORE, VICKY R	41000	41729	NST-2 Study Section [NST-2]	10778226	18	NEUROLOGY	9214214	HJD6G4D6TJY5	9214214	HJD6G4D6TJY5	US	37.426852	-122.17047	8046501	STANFORD U		Elite	female	97	STANFORD	CA	SCHOOLS OF MEDICINE	943052004	UNITED STATES	N	41365	41729	853	Other Research-Related	2013	89562	NINDS	89562	coastal
NHLBI	8469570	41332	PA-10-063	5K99HL111354-02	5	K99	HL	111354	2		MARIC-BILKAN, CHRISTINE	41044	41539	ZHL1-CSR-P(O2)	10353675	12	PHARMACOLOGY	966668691	N4WWJC8T2593	809593387; 966668691	JJJNQAJY5RN6; N4WWJC8T2593	US	33.470962	-81.991405	676605	AUGUSTA U		Non_Elite	female	99	AUGUSTA	GA	SCHOOLS OF MEDICINE	309120004	UNITED STATES	N	41334	41539	837	Other Research-Related	2013	90677	NHLBI	90677	coastal
NHLBI	8471178	41332	PA-11-197	5K99HL111319-02	5	K99	HL	111319	2		GALIS, ZORINA S	41061	41770	ZHL1-CSR-P(F1)	9320516	1	INTERNAL MEDICINE/MEDICINE	41064767	DZ4YCZ3QSPR5	41064767	DZ4YCZ3QSPR5	US	39.129719	-84.520554	1523902	U OF CINCINNATI		Non_Elite	female	96	CINCINNATI	OH	SCHOOLS OF MEDICINE	452210001	UNITED STATES	N	41334	41770	837	Other Research-Related	2013	119199	NHLBI	119199	#N/A
NIMH	8435409	41333	PA-11-197	5K99MH096746-02	5	K99	MH	96746	2		DESMOND, NANCY L	40969	41820	ZMH1-ERB-L(01)	10224602	5	NEUROSCIENCES	66469933	S352L5PJLMP8	66469933	S352L5PJLMP8	US	33.791247	-84.3249	2384501	EMORY U		Non_Elite	female	98	ATLANTA	GA	PRIMATE CENTERS	303221007	UNITED STATES	N	41334	41820	242	Other Research-Related	2013	87696	NIMH	87696	coastal
NIDA	8443070	41344	PA-11-197	1K99DA032681-01A1	1	K99	DA	32681	1	A	SORENSEN, ROGER	41365	41670	Career Development Education and Training Study Section[NIDA-K]	10484112	3	PHARMACOLOGY	42250712	GM1XX56LEP58	42250712	GM1XX56LEP58	US	39.953462	-75.193983	6463801	U OF PENNSYLVANIA		Elite	female	97	PHILADELPHIA	PA	SCHOOLS OF MEDICINE	191046205	UNITED STATES	N	41365	41670	279	Other Research-Related	2013	133182	NIDA	133182	coastal
NICHD	8451409	41349	PA-11-197	5K99HD068504-02	5	K99	HD	68504	2		ILEKIS, JOHN V	41000	41729	Obstetrics and Maternal-Fetal Biology Study Section[CHHD-B]	10500767	1	Unavailable	71284913	JZD1HLM2ZU83	71284913	JZD1HLM2ZU83	US	39.140663	-84.501007	615001	CINCINNATI CHILDRENS HOSP MED CTR		Non_Elite	female	98	CINCINNATI	OH	Independent Hospitals	452293039	UNITED STATES	N	41365	41729	865	Other Research-Related	2013	91706	NICHD	91706	coastal
NIGMS	8452678	41353	PA-11-197	5K99GM098328-02	5	K99	GM	98328	2		HAMLET, MICHELLE R	41005	41882	ZGM1-BRT-X(KR)	10203159	25	BIOCHEMISTRY	41294109	F27KDXZMF9Y8	41294109	F27KDXZMF9Y8	US	43.131774	-77.63546	7047101	U OF ROCHESTER	2149	Non_Elite	female	89	ROCHESTER	NY	SCHOOL OF MEDICINE & DENTISTRY	146270140	UNITED STATES	N	41365	41882	859	Other Research-Related	2013	90000	NIGMS	90000	coastal
NHLBI	8485655	41368	PA-11-197	5K99HL109167-02	5	K99	HL	109167	2		HUANG, LI-SHIN	41075	41455	ZHL1-CSR-P(F1)	9167313	4	INTERNAL MEDICINE/MEDICINE	44387793	TP7EK8DZV6N5	44387793	TP7EK8DZV6N5	US	36.007766	-78.926475	2221101	DUKE U		Elite	female	97	DURHAM	NC	SCHOOLS OF MEDICINE	277054673	UNITED STATES	N	41365	41455	837	Other Research-Related	2013	88500	NHLBI	88500	coastal
NIMH	8467749	41380	PA-11-197	5K99MH094408-02	5	K99	MH	94408	2		DESMOND, NANCY L	41039	41942	ZMH1-ERB-L(01)	10312770	7	PSYCHIATRY	1910777	FTMTDMBR29C7	1910777	FTMTDMBR29C7	US	39.325256	-76.605131	4134401	JOHNS HOPKINS U		Elite	female	92	BALTIMORE	MD	SCHOOLS OF MEDICINE	212182680	UNITED STATES	N	41395	41942	242	Other Research-Related	2013	74575	NIMH	74575	coastal
NIGMS	8475486	41387	PA-11-197	5K99GM101016-02	5	K99	GM	101016	2		FLICKER, PAULA F	41061	41486	ZGM1-BRT-X(KR)	10925989	5	BIOCHEMISTRY	616845814	MXLZGAMFEKN5	616845814	MXLZGAMFEKN5	US	42.366381	-71.254515	925301	BRANDEIS U		Elite	female	98	WALTHAM	MA	SCHOOLS OF ARTS AND SCIENCES	24532728	UNITED STATES	N	41426	41486	859	Other Research-Related	2013	14763	NIGMS	14763	coastal
NLM	8450756	41395	PA-11-197	5K99LM011128-02	5	K99	LM	11128	2		SIM, HUA-CHUAN	41000	42094	ZLM1-ZH-C(01)	9450656	4	INTERNAL MEDICINE/MEDICINE	44387793	TP7EK8DZV6N5	44387793	TP7EK8DZV6N5	US	36.007766	-78.926475	2221101	DUKE U		Elite	female	98	DURHAM	NC	SCHOOLS OF MEDICINE	277054673	UNITED STATES	N	41365	42094	879	Other Research-Related	2013	84517	NLM	84517	coastal
NIA	8443806	41396	PA-11-197	5K99AG039528-02	5	K99	AG	39528	2		HAAGA, JOHN G	41000	41729	Behavior and Social Science of Aging Study Section[NIA-S]	7831054	37	NONE	72933393	G88KLJR3KYT5	72933393	G88KLJR3KYT5	US	34.017282	-118.281254	7636101	U OF SOUTHERN CALIFORNIA	2232	Non_Elite	female	98	Los Angeles	CA	OTHER SPECIALIZED SCHOOLS	900894304	UNITED STATES	N	41409	41729	866	Other Research-Related	2013	86297	NIA	86297	coastal
NIDDK	8507227	41407	PA-11-197	5K99DK093711-02	5	K99	DK	93711	2		RANKIN, TRACY L	41105	41820	Kidney, Urologic and Hematologic Diseases D Study Section[DDK-D]	10218218	3	ORTHOPEDICS	43207562	FL6GV84CKN57	43207562	FL6GV84CKN57	US	41.310925	-72.926428	9420201	YALE U		Elite	female	70	NEW HAVEN	CT	SCHOOLS OF MEDICINE	65208327	UNITED STATES	N	41395	41820	847	Other Research-Related	2013	90000	NIDDK	90000	coastal
NIAID	8542378	41407	PA-11-197	1K99AI104262-01A1	1	K99	AI	104262	1	A	CHURCH, ELIZABETH S	41409	41759	AIDS Immunology and Pathogenesis Study Section[AIP]	9286260	12	UROLOGY	94878337	KMH5K9V7S518	94878337	KMH5K9V7S518	US	37.767442	-122.413937	577508	U OF CALIFORNIA SAN FRANCISCO		Elite	female	98	SAN FRANCISCO	CA	SCHOOLS OF MEDICINE	941432510	UNITED STATES	N	41409	41759	855	Other Research-Related	2013	132705	NIAID	132705	coastal
NICHD	8424355	41411	PA-11-197	1K99HD074670-01	1	K99	HD	74670	1		MUKHOPADHYAY, MAHUA	41414	41759	Developmental Biology Study Section[CHHD-C]	10318224	12	BIOCHEMISTRY	2484665	NJ1YPQXQG7U5	2484665	NJ1YPQXQG7U5	US	40.345441	-74.655866	6661401	PRINCETON U		Elite	female	99	Princeton	NJ	SCHOOLS OF ARTS AND SCIENCES	85406000	UNITED STATES	N	41414	41759	865	Other Research-Related	2013	96922	NICHD	96922	coastal
NIAID	8425182	41411	PA-11-197	1K99AI103032-01	1	K99	AI	103032	1		MCGUGAN, GLEN C	41395	41759	Microbiology and Infectious Diseases B Research Study Section[MID-B]	10299837	10	PUBLIC HEALTH & PREV MEDICINE	4315578	NMJHD63STRC5	4315578	NMJHD63STRC5	US	33.931173	-83.378873	676602	U OF GEORGIA		Non_Elite	female	97	ATHENS	GA	ORGANIZED RESEARCH UNITS	306021589	UNITED STATES	N	41395	41759	855	Other Research-Related	2013	89964	NIAID	89964	coastal
NIDA	8465855	41414	PA-11-197	5K99DA031787-02	5	K99	DA	31787	2		SORENSEN, ROGER	41061	41882	Career Development Education and Training Study Section[NIDA-K]	6998545	18	NEUROSCIENCES	4514360	MKAGLD59JRL1	4514360	MKAGLD59JRL1	US	40.440909	-79.959125	2059802	U OF PITTSBURGH AT PITTSBURGH		Elite	female	99	PITTSBURGH	PA	SCHOOLS OF ARTS AND SCIENCES	152133320	UNITED STATES	N	41426	41882	279	Other Research-Related	2013	126941	NIDA	126941	coastal
NIDA	8475571	41414	PA-11-197	5K99DA032543-02	5	K99	DA	32543	2		SORENSEN, ROGER	41061	41790	Career Development Education and Training Study Section[NIDA-K]	6699960	18	Unavailable	148230662	MGUCX773RNJ8	148230662	MGUCX773RNJ8	US	26.885174	-80.11392	10005569	SCRIPPS FLORIDA		Non_Elite	female	95	JUPITER	FL	Research Institutes	334585284	UNITED STATES	N	41426	41790	279	Other Research-Related	2013	148500	NIDA	148500	coastal
NIDCR	8475589	41417	PA-11-197	5K99DE022795-02	5	K99	DE	22795	2		FRIEDEN, LESLIE A	41091	41639	NIDCR Special Grants Review Committee[DSR]	9837686	3	PATHOLOGY	42250712	GM1XX56LEP58	42250712	GM1XX56LEP58	US	39.953462	-75.193983	6463801	U OF PENNSYLVANIA		Elite	female	98	PHILADELPHIA	PA	SCHOOLS OF DENTISTRY/ORAL HYGN	191046205	UNITED STATES	N	41456	41639	121	Other Research-Related	2013	77635	NIDCR	77635	coastal
NHGRI	8460833	41418	PA-10-063	5K99HG006452-02	5	K99	HG	6452	2		BOYER, JOY	41061	41869	Special Emphasis Panel[ZRG1-SEIR-B(01)Q]	10669712	18	SOCIAL SCIENCES	9214214	HJD6G4D6TJY5	9214214	HJD6G4D6TJY5	US	37.426852	-122.17047	8046501	STANFORD U		Elite	female	96	STANFORD	CA	SCHOOLS OF MEDICINE	943052004	UNITED STATES	N	41426	41869	172	Other Research-Related	2013	85594	NHGRI	85594	#N/A
NIAAA	8580763	41418	PA-12-270	7K99AA020514-03	7	K99	AA	20514	3		RADAEVA, SVETLANA	40787	41698	Biomedical Research Study Section[AA-1]	10512894	1	Unavailable	71284913	JZD1HLM2ZU83	71284913	JZD1HLM2ZU83	US	39.140663	-84.501007	615001	CINCINNATI CHILDRENS HOSP MED CTR		Non_Elite	female	89	CINCINNATI	OH	Independent Hospitals	452293039	UNITED STATES	N	41418	41698	273	Other Research-Related	2012	89109	NIAAA	89109	#N/A
NHLBI	8534814	41424	PA-11-197	5K99HL115123-02	5	K99	HL	115123	2		CARLSON, DREW E	41141	41639	ZHL1-CSR-P(M3)	9455409	7	PATHOLOGY	605799469	HD1WMN6945W6	605799469	HD1WMN6945W6	US	47.660307	-122.315168	9087701	U OF WASHINGTON		Elite	female	97	SEATTLE	WA	SCHOOLS OF MEDICINE	981959472	UNITED STATES	N	41426	41639	837	Other Research-Related	2013	72236	NHLBI	72236	#N/A
NINR	8501693	41435	PA-11-197	5K99NR013176-02	5	K99	NR	13176	2		TULLY, LOIS	41091	41820	Nursing Science Review Committee[NRRC(53)]	9766815	18	NEUROSURGERY	4514360	MKAGLD59JRL1	4514360	MKAGLD59JRL1	US	40.440909	-79.959125	2059802	U OF PITTSBURGH AT PITTSBURGH		Elite	female	100	PITTSBURGH	PA	SCHOOLS OF MEDICINE	152133320	UNITED STATES	N	41456	41820	361	Other Research-Related	2013	88146	NINR	88146	coastal
NHLBI	8536357	41437	PA-11-197	5K99HL111348-02	5	K99	HL	111348	2		COLOMBINI-HATCH, SANDRA	41153	41820	ZHL1-CSR-P(M3)	10796420	3	INTERNAL MEDICINE/MEDICINE	42250712	GM1XX56LEP58	42250712	GM1XX56LEP58	US	39.953462	-75.193983	6463801	U OF PENNSYLVANIA		Elite	female	89	PHILADELPHIA	PA	SCHOOLS OF MEDICINE	191046205	UNITED STATES	N	41456	41820	837	Other Research-Related	2013	92772	NHLBI	92772	#N/A
NIDCR	8497665	41438	PAR-09-256	5K99DE022060-02	5	K99	DE	22060	2		FRIEDEN, LESLIE A	41091	41820	NIDCR Special Grants Review Committee[DSR]	8759178	13	NONE	621889815	QHF5ZZ114M72	621889815	QHF5ZZ114M72	US	40.8415	-73.9414	1833205	COLUMBIA U HEALTH SCI		Elite	female	97	NEW YORK	NY	SCHOOLS OF DENTISTRY/ORAL HYGN	100323725	UNITED STATES	N	41456	41820	121	Other Research-Related	2013	134973	NIDCR	134973	#N/A
NIDCR	8500230	41438	PA-11-197	5K99DE022796-02	5	K99	DE	22796	2		FRIEDEN, LESLIE A	41091	41865	NIDCR Special Grants Review Committee[DSR]	10512533	27	NONE	9584210	U2JMKHNS5TG4	9584210	U2JMKHNS5TG4	US	34.134332	-118.12652	1073501	CALIFORNIA INST OF TECHNOLOGY		Elite	female	82	PASADENA	CA	SCHOOLS OF ARTS AND SCIENCES	911250001	UNITED STATES	N	41456	41865	121	Other Research-Related	2013	88007	NIDCR	88007	#N/A
NIAMS	8494575	41442	PA-11-197	5K99AR063161-02	5	K99	AR	63161	2		BAKER, CARL	41091	41789	Arthritis and Musculoskeletal and Skin Diseases Special Grants Study Section[AMS]	9418636	12	BIOLOGY	71037113	LHGDNJMZ64Y1	71037113	LHGDNJMZ64Y1	US	40.763746	-73.955386	7056601	ROCKEFELLER U		Non_Elite	female	99	NEW YORK	NY	GRADUATE SCHOOLS	100656399	UNITED STATES	N	41456	41789	846	Other Research-Related	2013	95796	NIAMS	95796	#N/A
NICHD	8496606	41442	PA-11-197	5K99HD071966-02	5	K99	HD	71966	2		KAU, ALICE S	41091	41820	Biobehavioral and Behavioral Sciences Study Section[CHHD-H]	10786102	7	PSYCHIATRY	605799469	HD1WMN6945W6	605799469	HD1WMN6945W6	US	47.660307	-122.315168	9087701	U OF WASHINGTON		Elite	female	98	SEATTLE	WA	SCHOOLS OF MEDICINE	981959472	UNITED STATES	N	41456	41820	865	Other Research-Related	2013	89670	NICHD	89670	coastal
NIAMS	8460099	41442	PA-11-197	5K99AR062595-02	5	K99	AR	62595	2		CIBOTTI, RICARDO	41091	41820	Arthritis and Musculoskeletal and Skin Diseases Special Grants Study Section[AMS]	9861242	12	PHYSIOLOGY	71037113	LHGDNJMZ64Y1	71037113	LHGDNJMZ64Y1	US	40.763746	-73.955386	7056601	ROCKEFELLER U		Non_Elite	female	98	NEW YORK	NY	GRADUATE SCHOOLS	100656399	UNITED STATES	N	41456	41820	846	Other Research-Related	2013	95593	NIAMS	95593	#N/A
NIDCD	8523831	41449	PA-11-197	5K99DC012536-02	5	K99	DC	12536	2		SKLARE, DAN	41129	41851	Communication Disorders Review Committee[CDRC]	9586291	7	BIOLOGY	160079455	EXZVPWZBLUE8	160079455	EXZVPWZBLUE8	US	42.050479	-87.680046	6144601	NORTHWESTERN U		Elite	female	97	Chicago	IL	SCHOOLS OF ARTS AND SCIENCES	606114579	UNITED STATES	N	41487	41851	173	Other Research-Related	2013	92292	NIDCD	92292	coastal
NIA	8443792	41457	PA-11-197	5K99AG039511-02	5	K99	AG	39511	2		WAGSTER, MOLLY V	41091	41486	Basic Neuroscience of Aging Study Section[NIA-N]	7078155	5	PHYSIOLOGY	937639060	E8VWJXMMUQ67	937639060	E8VWJXMMUQ67	US	43.04575	-88.020374	46001	MED COLL OF WISCONSIN		Non_Elite	female	98	MILWAUKEE	WI	SCHOOLS OF MEDICINE	532263548	UNITED STATES	N	41458	41486	866	Other Research-Related	2013	14747	NIA	14747	coastal
NHLBI	8532970	41464	PA-11-197	5K99HL111151-02	5	K99	HL	111151	2		TIGNO, XENIA	41153	41851	ZHL1-CSR-P(M3)	6985780	4	ANATOMY/CELL BIOLOGY	44387793	TP7EK8DZV6N5	44387793	TP7EK8DZV6N5	US	36.007766	-78.926475	2221101	DUKE U		Elite	female	98	DURHAM	NC	SCHOOLS OF MEDICINE	277054673	UNITED STATES	N	41487	41851	837	Other Research-Related	2013	100704	NHLBI	100704	coastal
NCI	8546318	41471	PA-11-197	5K99CA169512-02	5	K99	CA	169512	2		SCHMIDT, MICHAEL K	41169	41882	Institutional Training and Education Study Section (F)[NCI-F]	10405265	7	MISCELLANEOUS	1425594	E2NYLCDML6V1	1425594	E2NYLCDML6V1	US	42.359128	-71.093339	4911501	MASSACHUSETTS INST OF TECHNOLOGY		Elite	female	56	CAMBRIDGE	MA	ORGANIZED RESEARCH UNITS	21421029	UNITED STATES	N	41518	41882	398	Other Research-Related	2013	110355	NCI	110355	#N/A
NCI	8531192	41480	PA-10-063	7K99CA158065-02	7	K99	CA	158065	2		SCHMIDT, MICHAEL K	41153	41882	Institutional Training and Education Study Section (F)[NCI-F]	10471778	2	Unavailable	64367329	FF1XVJMDYVR1	64367329	FF1XVJMDYVR1	US	40.067891	-75.091086	1190002	RES INST OF FOX CHASE CAN CTR		Non_Elite	female	96	PHILADELPHIA	PA	Research Institutes	191112434	UNITED STATES	N	41518	41882	398	Other Research-Related	2013	100961	NCI	100961	coastal
NICHD	8535183	41484	PA-11-197	5K99HD073191-02	5	K99	HD	73191	2		COULOMBE, JAMES N	41153	42094	Developmental Biology Study Section[CHHD-C]	9710447	7	BIOLOGY	47006379	JDLVAVGYJQ21	47006379	JDLVAVGYJQ21	US	42.335672	-71.104237	3212902	HARVARD MED SCH		Elite	female	88	BOSTON	MA	SCHOOLS OF MEDICINE	21201616	UNITED STATES	N	41518	42094	865	Other Research-Related	2013	128817	NICHD	128817	#N/A
NICHD	8516081	41493	PA-11-197	5K99HD069410-02	5	K99	HD	69410	2		MOSS, STUART B	41153	41882	Reproduction, Andrology, and Gynecology Study Section[CHHD-R]	7245267	7	PHYSIOLOGY	605799469	HD1WMN6945W6	605799469	HD1WMN6945W6	US	47.660307	-122.315168	9087701	U OF WASHINGTON		Elite	female	98	SEATTLE	WA	SCHOOLS OF MEDICINE	981959472	UNITED STATES	N	41518	41882	865	Other Research-Related	2013	89521	NICHD	89521	coastal
NCI	8566534	41498	PA-11-197	1K99CA178091-01	1	K99	CA	178091	1		SCHMIDT, MICHAEL K	41499	41593	Transition to Independence Study Section (I)[NCI-I]	10328000	3	NONE	43207562	FL6GV84CKN57	43207562	FL6GV84CKN57	US	41.310925	-72.926428	9420201	YALE U		Elite	female	54	NEW HAVEN	CT	SCHOOLS OF ARTS AND SCIENCES	65208327	UNITED STATES	N	41499	41593	398	Other Research-Related	2013	99587	NCI	99587	#N/A
NIGMS	8539046	41499	PA-11-197	5K99GM099848-02	5	K99	GM	99848	2		FLICKER, PAULA F	41167	41882	ZGM1-BRT-X(KR)	8945082	12	BIOCHEMISTRY	94878337	KMH5K9V7S518	94878337	KMH5K9V7S518	US	37.767442	-122.413937	577508	U OF CALIFORNIA SAN FRANCISCO		Elite	female	92	SAN FRANCISCO	CA	SCHOOLS OF MEDICINE	941432510	UNITED STATES	N	41518	41882	859	Other Research-Related	2013	89017	NIGMS	89017	#N/A
NINDS	8545914	41499	PA-11-197	5K99NS078049-02	5	K99	NS	78049	2		BOSETTI, FRANCESCA	41167	42035	ZNS1-SRB-M(80)	10758397	7	NEUROLOGY	1910777	FTMTDMBR29C7	1910777	FTMTDMBR29C7	US	39.325256	-76.605131	4134401	JOHNS HOPKINS U		Elite	female	53	BALTIMORE	MD	SCHOOLS OF MEDICINE	212182680	UNITED STATES	N	41518	42035	853	Other Research-Related	2013	94770	NINDS	94770	coastal
NINR	8448067	41500	PA-11-197	5K99NR013548-02	5	K99	NR	13548	2		ROARY, MARY	41122	41851	Nursing Science Review Committee[NRRC(52)]	8797810	3	FAMILY MEDICINE	42250712	GM1XX56LEP58	42250712	GM1XX56LEP58	US	39.953462	-75.193983	6463801	U OF PENNSYLVANIA		Elite	female	98	PHILADELPHIA	PA	SCHOOLS OF MEDICINE	191046205	UNITED STATES	N	41503	41851	361	Other Research-Related	2013	60150	NINR	60150	coastal
NIDDK	8538967	41502	PA-11-197	5K99DK094980-02	5	K99	DK	94980	2		HAFT, CAROL R	41153	41521	Diabetes, Endocrinology and Metabolic Diseases B Study Section[DDK-B]	10896029	30	INTERNAL MEDICINE/MEDICINE	800771545	YZJ6DKPM4W63	800771545	YZJ6DKPM4W63	US	32.811963	-96.837534	578404	UT SOUTHWESTERN MED CTR		Non_Elite	female	63	DALLAS	TX	SCHOOLS OF MEDICINE	753909105	UNITED STATES	N	41518	41521	847	Other Research-Related	2013	90000	NIDDK	90000	coastal
NCI	8531690	41508	PA-11-197	5K99CA166643-02	5	K99	CA	166643	2		SCHMIDT, MICHAEL K	41175	42094	Institutional Training and Education Study Section (F)[NCI-F]	6727210	5	INTERNAL MEDICINE/MEDICINE	555917996	KABJZBBJ4B54	555917996	KABJZBBJ4B54	US	44.975143	-93.227003	1450402	U OF MINNESOTA		Non_Elite	female	93	MINNEAPOLIS	MN	ORGANIZED RESEARCH UNITS	554552070	UNITED STATES	N	41518	42094	398	Other Research-Related	2013	97538	NCI	97538	coastal
NIAAA	8534000	41513	PA-11-197	5K99AA020536-02	5	K99	AA	20536	2		PARSIAN, ABBAS	41153	41882	Epidemiology, Prevention and Behavior Research Study Section[AA-2]	10351078	2	PSYCHOLOGY	7431505	SPVKK1RC2MZ3	7431505	SPVKK1RC2MZ3	US	40.013296	-105.251932	1199902	U OF COLORADO		Non_Elite	female	98	Boulder	CO	SCHOOLS OF ARTS AND SCIENCES	803031058	UNITED STATES	N	41518	41882	273	Other Research-Related	2013	82151	NIAAA	82151	coastal
NIGMS	8425595	41515	PA-11-197	1K99GM104152-01	1	K99	GM	104152	1		FLICKER, PAULA F	41518	41882	ZGM1-BRT-X(KR)	10427767	7	BIOLOGY	47006379	JDLVAVGYJQ21	47006379	JDLVAVGYJQ21	US	42.335672	-71.104237	3212902	HARVARD MED SCH		Elite	female	98	BOSTON	MA	SCHOOLS OF MEDICINE	21201616	UNITED STATES	N	41518	41882	859	Other Research-Related	2013	90000	NIGMS	90000	coastal
NIGMS	8538468	41516	PA-11-197	5K99GM102319-02	5	K99	GM	102319	2		HAMLET, MICHELLE R	41153	41882	ZGM1-BRT-X(KR)	9659125	7	Unavailable	120989983	C186U32QSBR9	120989983	C186U32QSBR9	US	42.363037	-71.08963	1742101	WHITEHEAD INST FOR BIOMED RES		Elite	female	97	CAMBRIDGE	MA	Research Institutes	21421025	UNITED STATES	N	41518	41882	859	Other Research-Related	2013	87552	NIGMS	87552	#N/A
NICHD	8541042	41520	PA-11-197	5K99HD073327-02	5	K99	HD	73327	2		KING, ROSALIND B	41158	41851	Population Sciences Study Section[CHHD-W]	10948784	7	PUBLIC HEALTH & PREV MEDICINE	1910777	FTMTDMBR29C7	1910777	FTMTDMBR29C7	US	39.325256	-76.605131	4134401	JOHNS HOPKINS U		Elite	female	98	BALTIMORE	MD	SCHOOLS OF PUBLIC HEALTH	212182680	UNITED STATES	N	41487	41851	865	Other Research-Related	2013	136755	NICHD	136755	coastal
NIAAA	8585016	41591	PA-11-197	5K99AA021782-02	5	K99	AA	21782	2		GRANDISON, LINDSEY	41244	42124	Neuroscience and Behavior Study Section[AA-4]	9178740	12	PSYCHIATRY	71037113	LHGDNJMZ64Y1	71037113	LHGDNJMZ64Y1	US	40.763746	-73.955386	7056601	ROCKEFELLER U	70	Non_Elite	female	98	NEW YORK	NY	GRADUATE SCHOOLS	100656399	UNITED STATES	N	41609	42124	273	Other Research-Related	2014	130626	NIAAA	130626	#N/A
NIDCD	8589410	41600	PA-11-197	5K99DC012803-02	5	K99	DC	12803	2		SULLIVAN, SUSAN L	41244	41973	Communication Disorders Review Committee[CDRC]	9781938	7	NEUROLOGY	5436803	KG76WYENL5K1	5436803	KG76WYENL5K1	US	42.050479	-87.680046	6144650	NORTHWESTERN U		Elite	female	94	CHICAGO	IL	SCHOOLS OF MEDICINE	606114579	UNITED STATES	N	41609	41973	173	Other Research-Related	2014	95410	NIDCD	95410	coastal
NIEHS	8599457	41604	PA-11-197	5K99ES022244-02	5	K99	ES	22244	2		TYSON, FREDERICK L	41261	42338	ZES1-JAB-J(K9)	9744871	3	ANATOMY/CELL BIOLOGY	42250712	GM1XX56LEP58	42250712	GM1XX56LEP58	US	39.953462	-75.193983	6463801	U OF PENNSYLVANIA		Elite	female	97	PHILADELPHIA	PA	SCHOOLS OF MEDICINE	191046205	UNITED STATES	N	41609	42338	113	Other Research-Related	2014	99547	NIEHS	99547	coastal
NIDA	8586520	41607	PA-11-197	5K99DA033878-02	5	K99	DA	33878	2		SORENSEN, ROGER	41244	42004	Career Development Education and Training Study Section[NIDA-K]	10885481	4	PHARMACOLOGY	105300446	MLQFL4JSSAA9	105300446	MLQFL4JSSAA9	US	37.549807	-77.452775	353201	VIRGINIA COMMONWEALTH U		Non_Elite	female	98	RICHMOND	VA	SCHOOLS OF MEDICINE	232980568	UNITED STATES	N	41609	42004	279	Other Research-Related	2014	110190	NIDA	110190	#N/A
NIDA	8601060	41626	PA-11-197	5K99DA033374-02	5	K99	DA	33374	2		SORENSEN, ROGER	41275	42004	Career Development Education and Training Study Section[NIDA-K]	8614202	14	PHARMACOLOGY	800771149	MSPWVMXXMN76	800771149	MSPWVMXXMN76	US	29.311028	-94.778007	578406	U OF TEXAS MED BR GALVESTON		Non_Elite	female	99	GALVESTON	TX	SCHOOLS OF MEDICINE	775555302	UNITED STATES	N	41640	42004	279	Other Research-Related	2014	142775	NIDA	142775	coastal
NIMH	8618105	41640	PA-11-197	1K99MH102351-01	1	K99	MH	102351	1		DESMOND, NANCY L	41640	42004	ZMH1-ERB-L(05)	9010918	7	Unavailable	76593722	Z1L9F1MM1RY3	76593722	Z1L9F1MM1RY3	US	42.337481	-71.104964	1504801	BOSTON CHILDRENS HOSP		Elite	female	98	BOSTON	MA	Independent Hospitals	21155724	UNITED STATES	N	41640	42004	242	Other Research-Related	2014	90000	NIMH	90000	coastal
NCI	8601299	41648	PA-11-197	5K99CA172371-02	5	K99	CA	172371	2		SCHMIDT, MICHAEL K	41275	42004	Transition to Independence Study Section (I)[NCI-I]	10544407	7	MICROBIOLOGY/IMMUN/VIROLOGY	605799469	HD1WMN6945W6	605799469	HD1WMN6945W6	US	47.660307	-122.315168	9087701	U OF WASHINGTON		Elite	female	54	SEATTLE	WA	SCHOOLS OF MEDICINE	981959472	UNITED STATES	N	41640	42004	398	Other Research-Related	2014	169771	NCI	169771	coastal
NHLBI	8635605	41649	PA-11-197	1K99HL119606-01A1	1	K99	HL	119606	1	A	LAPOSKY, AARON D	41671	42035	ZHL1-CSR-P(O1)	9561916	2	BIOLOGY	161202122	LCLSJAGTNZQ7	161202122	LCLSJAGTNZQ7	US	43.068519	-89.400858	578503	U OF WISCONSIN MADISON		Elite	female	98	MADISON	WI	SCHOOLS OF VETERINARY MEDICINE	537151218	UNITED STATES	N	41671	42035	838	Other Research-Related	2014	104371	NHLBI	104371	#N/A
NHLBI	8626251	41656	PA-11-197	5K99HL111215-02	5	K99	HL	111215	2		TIGNO, XENIA	41328	42094	ZHL1-CSR-P(O1)	10816268	3	PHYSIOLOGY	969663814	NNFQH1JAPEP3	969663814	NNFQH1JAPEP3	US	29.643443	-82.349637	513806	U OF FLORIDA		Non_Elite	female	98	GAINESVILLE	FL	SCHOOLS OF VETERINARY MEDICINE	326115500	UNITED STATES	N	41671	42094	837	Other Research-Related	2014	133434	NHLBI	133434	coastal
NHLBI	8635881	41656	PA-11-197	1K99HL118215-01A1	1	K99	HL	118215	1	A	CARLSON, DREW E	41656	42022	ZHL1-CSR-P(O1)	10213271	52	INTERNAL MEDICINE/MEDICINE	804355790	UYTTZT6G9DT1	804355790	UYTTZT6G9DT1	US	32.876991	-117.24087	577507	U OF CALIFORNIA SAN DIEGO		Elite	female	76	LA JOLLA	CA	SCHOOLS OF MEDICINE	920930621	UNITED STATES	N	41656	42022	837	Other Research-Related	2014	84817	NHLBI	84817	coastal
NINDS	8626456	41659	PA-11-197	5K99NS082619-02	5	K99	NS	82619	2		GUBITZ, AMELIE	41334	42063	NST-2 Study Section [NST-2]	9562289	3	PHYSIOLOGY	42250712	GM1XX56LEP58	42250712	GM1XX56LEP58	US	39.953462	-75.193983	6463801	U OF PENNSYLVANIA		Elite	female	98	PHILADELPHIA	PA	SCHOOLS OF MEDICINE	191046205	UNITED STATES	N	41699	42063	853	Other Research-Related	2014	90000	NINDS	90000	coastal
NIDA	8606840	41662	PA-11-197	5K99DA033372-02	5	K99	DA	33372	2		SORENSEN, ROGER	41306	42035	Career Development Education and Training Study Section[NIDA-K]	8403329	3	PHARMACOLOGY	42250712	GM1XX56LEP58	42250712	GM1XX56LEP58	US	39.953462	-75.193983	6463801	U OF PENNSYLVANIA		Elite	female	98	PHILADELPHIA	PA	SCHOOLS OF MEDICINE	191046205	UNITED STATES	N	41671	42035	279	Other Research-Related	2014	158358	NIDA	158358	#N/A
NIEHS	8608527	41668	PA-11-197	5K99ES022269-02	5	K99	ES	22269	2		SHREFFLER, CAROL A	41306	41820	ZES1-JAB-J(K9)	10528305	4	PUBLIC HEALTH & PREV MEDICINE	785979618	LT9CXX8L19G1	785979618	LT9CXX8L19G1	US	40.57951	-105.081267	1725201	COLORADO STATE U	1245	Non_Elite	female	99	FORT COLLINS	CO	SCHOOLS OF VETERINARY MEDICINE	805232002	UNITED STATES	N	41671	41820	113	Other Research-Related	2014	114557	NIEHS	114557	coastal
NHLBI	8613504	41672	PA-11-197	5K99HL116778-02	5	K99	HL	116778	2		CARLSON, DREW E	41310	42308	ZHL1-CSR-P(O1)	7875227	7	BIOCHEMISTRY	188435911	Z9CRZKD42ZT1	188435911	Z9CRZKD42ZT1	US	39.292248	-76.625629	820104	U OF MARYLAND BALTIMORE	1664	Non_Elite	female	97	BALTIMORE	MD	SCHOOLS OF MEDICINE	212011508	UNITED STATES	N	41671	42308	837	Other Research-Related	2014	129060	NHLBI	129060	coastal
NIAAA	8619571	41673	PA-11-197	5K99AA021264-02	5	K99	AA	21264	2		JUNG, KATHY	41320	42035	Biomedical Research Study Section[AA-1]	10367924	26	MICROBIOLOGY/IMMUN/VIROLOGY	71298814	Q3KCVK5S9CP1	71298814	Q3KCVK5S9CP1	US	25.761055	-80.376195	513809	FLORIDA INTERNATIONAL U	951	Non_Elite	female	100	MIAMI	FL	SCHOOLS OF MEDICINE	331992516	UNITED STATES	N	41671	42035	273	Other Research-Related	2014	85797	NIAAA	85797	coastal
NCI	8634229	41674	PA-11-197	1K99CA175179-01A1	1	K99	CA	175179	1	A	SCHMIDT, MICHAEL K	41674	41943	Transition to Independence Study Section (I)[NCI-I]	11372368	12	Unavailable	64931884	KUKXRCZ6NZC2	64931884	KUKXRCZ6NZC2	US	40.764045	-73.956024	5079202	SLOAN KETTERING INST CAN RES		Non_Elite	female	98	NEW YORK	NY	Research Institutes	100656007	UNITED STATES	N	41674	41943	398	Other Research-Related	2014	147658	NCI	147658	coastal
NINDS	8679786	41682	PA-11-197	1K99NS087110-01	1	K99	NS	87110	1		WHITTEMORE, VICKY R	41730	42094	NST-2 Study Section [NST-2]	8647419	45	ANATOMY/CELL BIOLOGY	46705849	MJC5FCYQTPE6	46705849	MJC5FCYQTPE6	US	33.64852	-117.82136	577504	U OF CALIFORNIA IRVINE		Non_Elite	female	98	IRVINE	CA	SCHOOLS OF MEDICINE	926970001	UNITED STATES	N	41730	42094	853	Other Research-Related	2014	90000	NINDS	90000	coastal
NIGMS	8627185	41696	PA-11-197	5K99GM099796-02	5	K99	GM	99796	2		GERRATANA, BARBARA	41334	41820	ZGM1-BRT-X(KR)	7742254	7	BIOCHEMISTRY	47006379	JDLVAVGYJQ21	47006379	JDLVAVGYJQ21	US	42.335672	-71.104237	3212902	HARVARD MED SCH		Elite	female	98	BOSTON	MA	SCHOOLS OF MEDICINE	21201616	UNITED STATES	N	41699	41820	859	Other Research-Related	2014	29820	NIGMS	29820	coastal
NIDCD	8617263	41698	PA-11-197	5K99DC012575-02	5	K99	DC	12575	2		SHEKIM, LANA O	41334	41953	Communication Disorders Review Committee[CDRC]	11055235	7	OTHER BASIC SCIENCES	188435911	Z9CRZKD42ZT1	188435911	Z9CRZKD42ZT1	US	39.292248	-76.625629	820104	U OF MARYLAND BALTIMORE		Non_Elite	female	75	BALTIMORE	MD	SCHOOLS OF DENTISTRY/ORAL HYGN	212011508	UNITED STATES	N	41699	41953	173	Other Research-Related	2014	94715	NIDCD	94715	#N/A
AHRQ	8631059	41703	RFA-HS-12-007	5K99HS022193-02	5	K99	HS	22193	2		WILLIS, TAMARA	41338	42063	ZHS1-HSR-C(01)	11470412	7	Unavailable	30811269	QN6MS4VN7BD1	30811269	QN6MS4VN7BD1	US	42.336107	-71.107481	1080401	BRIGHAM AND WOMENS HOSP		Elite	female	98	BOSTON	MA	Independent Hospitals	21156110	UNITED STATES	N	41699	42063	226	Other Research-Related	2014	152928	AHRQ	152928	#N/A
AHRQ	8662246	41704	RFA-HS-12-007	5K99HS022198-02	5	K99	HS	22198	2		WILLIS, TAMARA	41409	42155	ZHS1-HSR-C(01)	11048915	6	PEDIATRICS	41096314	MW8JHK6ZYEX8	41096314	MW8JHK6ZYEX8	US	39.745098	-104.837605	1199905	U OF COLORADO DENVER		Non_Elite	female	98	Aurora	CO	SCHOOLS OF MEDICINE	800452570	UNITED STATES	N	41760	42155	226	Other Research-Related	2014	149339	AHRQ	149339	coastal
NHLBI	8669853	41729	PA-11-197	5K99HL118157-02	5	K99	HL	118157	2		YANG, YU-CHUNG	41365	42185	ZHL1-CSR-P(F2)	11361574	7	Unavailable	120989983	C186U32QSBR9	120989983	C186U32QSBR9	US	42.363037	-71.08963	1742101	WHITEHEAD INST FOR BIOMED RES		Elite	female	68	CAMBRIDGE	MA	Research Institutes	21421025	UNITED STATES	N	41730	42185	837	Other Research-Related	2014	114036	NHLBI	114036	coastal
NIMH	8641419	41751	PA-11-197	5K99MH096807-02	5	K99	MH	96807	2		DESMOND, NANCY L	41365	41759	ZMH1-ERB-L(01)	10939811	33	MICROBIOLOGY/IMMUN/VIROLOGY	92530369	RN64EPNH8JC6	92530369	RN64EPNH8JC6	US	34.070199	-118.45102	577505	U OF CALIFORNIA LOS ANGELES		Elite	female	60	LOS ANGELES	CA	SCHOOLS OF MEDICINE	900952000	UNITED STATES	N	41730	41759	242	Other Research-Related	2014	14631	NIMH	14631	coastal
NCI	8700823	41772	PA-11-197	1K99CA178199-01A1	1	K99	CA	178199	1	A	SCHMIDT, MICHAEL K	41791	42521	Transition to Independence Study Section (I)[NCI-I]	10424828	7	Unavailable	76580745	DPMGH9MG1X67	76580745	DPMGH9MG1X67	US	42.337593	-71.108279	1464901	DANA FARBER CANCER INST		Elite	female	74	BOSTON	MA	Independent Hospitals	22155450	UNITED STATES	N	41791	42155	398	Other Research-Related	2014	125748	NCI	125748	#N/A
NIA	8666701	41774	PA-11-197	5K99AG042483-02	5	K99	AG	42483	2		WISE, BRADLEY C	41426	42155	Basic Neuroscience of Aging Study Section[NIA-N]	10382657	13	NEUROLOGY	621889815	QHF5ZZ114M72	621889815	QHF5ZZ114M72	US	40.8415	-73.9414	1833205	COLUMBIA U HEALTH SCI		Elite	female	78	NEW YORK	NY	SCHOOLS OF MEDICINE	100323725	UNITED STATES	N	41791	42155	866	Other Research-Related	2014	100971	NIA	100971	coastal
NICHD	8705560	41774	PA-11-197	5K99HD076679-02	5	K99	HD	76679	2		RUSSO, DENISE	41487	42155	AIDS Clinical Studies and Epidemiology Study Section[ACE]	10440440	7	PUBLIC HEALTH & PREV MEDICINE	605799469	HD1WMN6945W6	605799469	HD1WMN6945W6	US	47.660307	-122.315168	9087701	U OF WASHINGTON		Elite	female	95	SEATTLE	WA	SCHOOLS OF MEDICINE	981959472	UNITED STATES	N	41791	42155	865	Other Research-Related	2014	104091	NICHD	104091	#N/A
NICHD	8643817	41778	PA-11-197	5K99HD076165-02	5	K99	HD	76165	2		TAYMANS, SUSAN	41365	42004	Developmental Biology Study Section[CHHD-C]	10409304	18	ANATOMY/CELL BIOLOGY	9214214	HJD6G4D6TJY5	9214214	HJD6G4D6TJY5	US	37.426852	-122.17047	8046501	STANFORD U		Elite	female	98	STANFORD	CA	SCHOOLS OF MEDICINE	943052004	UNITED STATES	N	41730	42004	865	Other Research-Related	2014	98101	NICHD	98101	coastal
NICHD	8637106	41778	PA-11-197	5K99HD075886-02	5	K99	HD	75886	2		ALVAREZ, RUBEN P	41426	42271	Biobehavioral and Behavioral Sciences Study Section[CHHD-H]	9570956	2	NONE	76248616	SSUJB3GSH8A5	76248616	SSUJB3GSH8A5	US	38.951542	-95.265562	1484302	U OF KANSAS LAWRENCE		Non_Elite	female	98	LAWRENCE	KS	ORGANIZED RESEARCH UNITS	660457552	UNITED STATES	N	41791	42271	865	Other Research-Related	2014	130950	NICHD	130950	#N/A
NIA	8726274	41778	PA-11-197	5K99AG044444-02	5	K99	AG	44444	2		WAGSTER, MOLLY V	41518	42019	Basic Neuroscience of Aging Study Section[NIA-N]	11378019	5	MICROBIOLOGY/IMMUN/VIROLOGY	82359691	LN53LCFJFL45	82359691	LN53LCFJFL45	US	42.369697	-71.11193	3212901	HARVARD U		Elite	female	98	CAMBRIDGE	MA	SCHOOLS OF ARTS AND SCIENCES	21385369	UNITED STATES	N	41791	42019	866	Other Research-Related	2014	97282	NIA	97282	coastal
NIDDK	8678907	41786	PA-11-197	5K99DK094977-02	5	K99	DK	94977	2		HAMILTON, FRANK A	41440	42094	ZDK1-GRB-2(O2)M	10236788	3	INTERNAL MEDICINE/MEDICINE	42250712	GM1XX56LEP58	42250712	GM1XX56LEP58	US	39.953462	-75.193983	6463801	U OF PENNSYLVANIA		Elite	female	99	PHILADELPHIA	PA	SCHOOLS OF MEDICINE	191046205	UNITED STATES	N	41791	42094	847	Other Research-Related	2014	90000	NIDDK	90000	coastal
NHLBI	8707877	41796	PA-11-197	5K99HL114651-02	5	K99	HL	114651	2		TIGNO, XENIA	41487	42277	ZHL1-CSR-P(F2)	11135703	7	Unavailable	30811269	QN6MS4VN7BD1	30811269	QN6MS4VN7BD1	US	42.336107	-71.107481	1080401	BRIGHAM AND WOMENS HOSP		Elite	female	91	BOSTON	MA	Independent Hospitals	21156110	UNITED STATES	N	41821	42277	837	Other Research-Related	2014	137160	NHLBI	137160	coastal
NHLBI	8701385	41796	PA-11-197	5K99HL116651-02	5	K99	HL	116651	2		TIGNO, XENIA	41470	42185	ZHL1-CSR-P(O1)	10802382	7	Unavailable	30811269	QN6MS4VN7BD1	30811269	QN6MS4VN7BD1	US	42.336107	-71.107481	1080401	BRIGHAM AND WOMENS HOSP		Elite	female	79	BOSTON	MA	Independent Hospitals	21156110	UNITED STATES	N	41821	42185	837	Other Research-Related	2014	137160	NHLBI	137160	#N/A
NICHD	8704976	41799	PA-11-197	5K99HD074743-02	5	K99	HD	74743	2		GRAVE, GILMAN D	41480	42551	Pediatrics Study Section[CHHD-A]	10568461	18	MICROBIOLOGY/IMMUN/VIROLOGY	9214214	HJD6G4D6TJY5	9214214	HJD6G4D6TJY5	US	37.426852	-122.17047	8046501	STANFORD U		Elite	female	99	STANFORD	CA	SCHOOLS OF MEDICINE	943052004	UNITED STATES	N	41821	42551	865	Other Research-Related	2014	104593	NICHD	104593	coastal
NHLBI	8704231	41803	PA-11-197	5K99HL118159-02	5	K99	HL	118159	2		WANG, WAYNE C	41474	42185	ZHL1-CSR-P(F2)	10301276	9	ANATOMY/CELL BIOLOGY	51113330	FXKMA43NTV21	51113330	FXKMA43NTV21	US	29.70926	-95.400851	481201	BAYLOR COLL OF MED		Non_Elite	female	96	HOUSTON	TX	SCHOOLS OF MEDICINE	770303411	UNITED STATES	N	41821	42185	837	Other Research-Related	2014	124476	NHLBI	124476	coastal
NICHD	8720805	41807	PA-11-197	5K99HD075654-02	5	K99	HD	75654	2		NEWCOMER, SUSAN	41499	42185	Behavioral and Social Science Approaches to Preventing HIV/AIDS Study Section[BSPH]	10699438	4	PSYCHOLOGY	608195277	D3LHU66KBLD5	608195277	D3LHU66KBLD5	US	35.9316	-79.057377	578206	U OF NORTH CAROLINA CHAPEL HILL		Elite	female	98	CHAPEL HILL	NC	SCHOOLS OF ARTS AND SCIENCES	275995023	UNITED STATES	N	41821	42185	865	Other Research-Related	2014	87117	NICHD	87117	coastal
NHLBI	8724554	41808	PA-11-197	5K99HL118161-02	5	K99	HL	118161	2		CARLSON, DREW E	41507	42185	ZHL1-CSR-P(F2)	10369513	33	INTERNAL MEDICINE/MEDICINE	92530369	RN64EPNH8JC6	92530369	RN64EPNH8JC6	US	34.070199	-118.45102	577505	U OF CALIFORNIA LOS ANGELES		Elite	female	99	LOS ANGELES	CA	SCHOOLS OF MEDICINE	900952000	UNITED STATES	N	41821	42185	837	Other Research-Related	2014	90461	NHLBI	90461	coastal
NIAID	8751163	41814	PA-11-197	1K99AI112691-01	1	K99	AI	112691	1		DUNCAN, RORY A	41821	42369	Microbiology and Infectious Diseases Advisory Committee[MID]	10249734	12	MICROBIOLOGY/IMMUN/VIROLOGY	94878337	KMH5K9V7S518	94878337	KMH5K9V7S518	US	37.767442	-122.413937	577508	U OF CALIFORNIA SAN FRANCISCO		Elite	female	97	SAN FRANCISCO	CA	SCHOOLS OF MEDICINE	941432510	UNITED STATES	N	41821	42369	855	Other Research-Related	2014	126630	NIAID	126630	#N/A
NIAID	8618504	41815	PA-11-197	1K99AI108793-01	1	K99	AI	108793	1		PROGRAIS, LAWRENCE J	41821	42247	Allergy, Immunology, and Transplantation Research Committee[AITC]	10361919	7	Unavailable	76593722	Z1L9F1MM1RY3	76593722	Z1L9F1MM1RY3	US	42.337481	-71.104964	1504801	BOSTON CHILDRENS HOSP		Elite	female	65	BOSTON	MA	Independent Hospitals	21155724	UNITED STATES	N	41821	42247	855	Other Research-Related	2014	119869	NIAID	119869	#N/A
NINDS	8658496	41817	PA-11-197	5K99NS083714-02	5	K99	NS	83714	2		RIDDLE, ROBERT D	41456	42004	NST-2 Study Section [NST-2]	11311652	2	NEUROSCIENCES	9095365	LL8GLEVH6MG3	9095365	LL8GLEVH6MG3	US	40.764542	-111.850317	514002	U OF UTAH		Non_Elite	female	98	SALT LAKE CITY	UT	SCHOOLS OF MEDICINE	841128906	UNITED STATES	N	41821	42004	853	Other Research-Related	2014	88943	NINDS	88943	coastal
NIAID	8766153	41821	PA-11-197	1K99AI108728-01A1	1	K99	AI	108728	1	A	PROGRAIS, LAWRENCE J	41821	41879	Allergy, Immunology, and Transplantation Research Committee[AITC]	10265711	49	Unavailable	781613492	PHZJFZ32NKH4	781613492	PHZJFZ32NKH4	US	32.903062	-117.243592	7375802	SCRIPPS RES INST THE		Non_Elite	female	98	LA JOLLA	CA	Other Domestic Non-Profits	920371000	UNITED STATES	N	41821	41879	855	Other Research-Related	2014	94500	NIAID	94500	#N/A
NCI	8712423	41828	PA-11-197	5K99CA175176-02	5	K99	CA	175176	2		SCHMIDT, MICHAEL K	41488	42195	Transition to Independence Study Section (I)[NCI-I]	10293885	7	BIOLOGY	47006379	JDLVAVGYJQ21	47006379	JDLVAVGYJQ21	US	42.335672	-71.104237	3212902	HARVARD MED SCH		Elite	female	98	BOSTON	MA	SCHOOLS OF MEDICINE	21201616	UNITED STATES	N	41852	42195	398	Other Research-Related	2014	89352	NCI	89352	coastal
NIMH	8715865	41828	PA-11-197	5K99MH101234-02	5	K99	MH	101234	2		DESMOND, NANCY L	41501	42216	ZMH1-ERB-L(03)	11236471	7	ANATOMY/CELL BIOLOGY	604483045	FBYMGMHW4X95	604483045	FBYMGMHW4X95	US	42.33639	-71.07097	894901	BOSTON U MED CAMPUS		Non_Elite	female	97	BOSTON	MA	SCHOOLS OF MEDICINE	21182340	UNITED STATES	N	41852	42216	242	Other Research-Related	2014	85476	NIMH	85476	coastal
NCI	8712425	41828	PA-11-197	5K99CA180221-02	5	K99	CA	180221	2		RADAEV, SERGEY	41488	42582	Transition to Independence Study Section (I)[NCI-I]	11580191	7	ANATOMY/CELL BIOLOGY	47006379	JDLVAVGYJQ21	47006379	JDLVAVGYJQ21	US	42.335672	-71.104237	3212902	HARVARD MED SCH		Elite	female	78	BOSTON	MA	SCHOOLS OF MEDICINE	21201616	UNITED STATES	N	41852	42582	398	Other Research-Related	2014	102426	NCI	102426	coastal
AHRQ	8702135	41831	RFA-HS-12-007	5K99HS022189-02	5	K99	HS	22189	2		WILLIS, TAMARA	41487	42216	ZHS1-HSR-C(01)	10978604	4	OTHER CLINICAL SCIENCES	44387793	TP7EK8DZV6N5	44387793	TP7EK8DZV6N5	US	36.007766	-78.926475	2221101	DUKE U		Elite	female	92	DURHAM	NC	SCHOOLS OF MEDICINE	277054673	UNITED STATES	N	41852	42216	226	Other Research-Related	2014	135827	AHRQ	135827	coastal
AHRQ	8705396	41831	RFA-HS-13-002	5K99HS022408-02	5	K99	HS	22408	2		WILLIS, TAMARA	41487	42216	ZHS1-HSR-C(01)	11640501	12	INTERNAL MEDICINE/MEDICINE	94878337	KMH5K9V7S518	94878337	KMH5K9V7S518	US	37.767442	-122.413937	577508	U OF CALIFORNIA SAN FRANCISCO		Elite	female	92	SAN FRANCISCO	CA	SCHOOLS OF MEDICINE	941432510	UNITED STATES	N	41852	42216	226	Other Research-Related	2014	156335	AHRQ	156335	coastal
NCI	8700803	41831	PA-11-197	1K99CA182731-01A1	1	K99	CA	182731	1	A	SCHMIDT, MICHAEL K	41852	42063	Transition to Independence Study Section (I)[NCI-I]	9574738	8	Unavailable	73130411	FLJ7DQKLL226	73130411	FLJ7DQKLL226	US	42.363198	-71.068772	4907701	MASSACHUSETTS GENERAL HOSP		Elite	female	88	BOSTON	MA	Independent Hospitals	21142621	UNITED STATES	N	41852	42063	393	Other Research-Related	2014	135216	NCI	135216	coastal
NICHD	8703734	41834	PA-11-197	5K99HD073240-02	5	K99	HD	73240	2		CRUZ, THERESA	41487	42039	ZHD1-RRG-K(LM)	8630186	7	Unavailable	68477546	XAJWT43U55A3	68477546	XAJWT43U55A3	US	41.895742	-87.618543	6898901	REHABILITATION INST OF CHICAGO D/B/A SHIRLEY RYAN ABILITYLAB		Non_Elite	female	98	CHICAGO	IL	Research Institutes	606113167	UNITED STATES	N	41852	42039	865	Other Research-Related	2014	110268	NICHD	110268	#N/A
AHRQ	8704158	41835	RFA-HS-13-002	5K99HS022406-02	5	K99	HS	22406	2		WILLIS, TAMARA	41487	42369	ZHS1-HSR-C(01)	10603297	3	OTHER HEALTH PROFESSIONS	42250712	GM1XX56LEP58	42250712	GM1XX56LEP58	US	39.953462	-75.193983	6463801	U OF PENNSYLVANIA		Elite	female	98	PHILADELPHIA	PA	SCHOOLS OF NURSING	191046205	UNITED STATES	N	41852	42369	226	Other Research-Related	2014	148846	AHRQ	148846	coastal
NIGMS	8730205	41835	PA-11-197	5K99GM107351-02	5	K99	GM	107351	2		SESMA, MICHAEL A	41526	42185	ZGM1-TRN-X(KR)	10199354	7	Unavailable	78200995	HMSNCM57QNR5	78200995	HMSNCM57QNR5	US	47.627342	-122.331593	861001	FRED HUTCHINSON CANCER RES CTR		Elite	female	97	SEATTLE	WA	Research Institutes	981094433	UNITED STATES	N	41852	42185	859	Other Research-Related	2014	90000	NIGMS	90000	coastal
NCI	8719954	41836	PA-11-197	5K99CA169430-02	5	K99	CA	169430	2		RADAEV, SERGEY	41498	42460	Transition to Independence Study Section (I)[NCI-I]	11085904	6	INTERNAL MEDICINE/MEDICINE	41096314	MW8JHK6ZYEX8	41096314	MW8JHK6ZYEX8	US	39.745098	-104.837605	1199905	U OF COLORADO DENVER		Non_Elite	female	96	Aurora	CO	SCHOOLS OF MEDICINE	800452570	UNITED STATES	N	41852	42460	398	Other Research-Related	2014	109026	NCI	109026	coastal
NCI	8716708	41836	PA-11-197	5K99CA178191-02	5	K99	CA	178191	2		RADAEV, SERGEY	41493	42582	Transition to Independence Study Section (I)[NCI-I]	10335563	12	Unavailable	64931884	KUKXRCZ6NZC2	64931884	KUKXRCZ6NZC2	US	40.764045	-73.956024	5079202	SLOAN KETTERING INST CAN RES		Non_Elite	female	98	NEW YORK	NY	Research Institutes	100656007	UNITED STATES	N	41852	42582	398	Other Research-Related	2014	97945	NCI	97945	coastal
NCI	8711381	41836	PA-11-197	5K99CA168996-02	5	K99	CA	168996	2		SCHMIDT, MICHAEL K	41487	42124	Transition to Independence Study Section (I)[NCI-I]	10560306	12	Unavailable	64931884	KUKXRCZ6NZC2	64931884	KUKXRCZ6NZC2	US	40.764045	-73.956024	5079202	SLOAN KETTERING INST CAN RES		Non_Elite	female	71	NEW YORK	NY	Research Institutes	100656007	UNITED STATES	N	41852	42124	398	Other Research-Related	2014	152391	NCI	152391	coastal
NINR	8743828	41837	PA-11-197	5K99NR014675-02	5	K99	NR	14675	2		TULLY, LOIS	41544	42216	Nursing Science Review Committee[NRRC(57)]	8799094	3	NEUROSCIENCES	42250712	GM1XX56LEP58	42250712	GM1XX56LEP58	US	39.953462	-75.193983	6463801	U OF PENNSYLVANIA		Elite	female	98	PHILADELPHIA	PA	SCHOOLS OF MEDICINE	191046205	UNITED STATES	N	41852	42216	361	Other Research-Related	2014	89700	NINR	89700	#N/A
NCI	8716702	41841	PA-11-197	5K99CA172360-02	5	K99	CA	172360	2		SCHMIDT, MICHAEL K	41493	42216	Transition to Independence Study Section (I)[NCI-I]	10381742	14	ANATOMY/CELL BIOLOGY	110521739		110521739		US	40.85103	-73.844379	9433501	ALBERT EINSTEIN COLL OF MED		Non_Elite	female	97	BRONX	NY	SCHOOLS OF MEDICINE	104611900	UNITED STATES	N	41852	42216	398	Other Research-Related	2014	138712	NCI	138712	coastal
NHLBI	8719166	41842	PA-11-197	5K99HL119353-02	5	K99	HL	119353	2		CARLSON, DREW E	41495	42216	ZHL1-CSR-P(M2)	9425513	1	Unavailable	71284913	JZD1HLM2ZU83	71284913	JZD1HLM2ZU83	US	39.140663	-84.501007	615001	CINCINNATI CHILDRENS HOSP MED CTR		Non_Elite	female	98	CINCINNATI	OH	Independent Hospitals	452293039	UNITED STATES	N	41852	42216	837	Other Research-Related	2014	131085	NHLBI	131085	coastal
NCI	8791458	41842	PA-11-197	1K99CA181492-01A1	1	K99	CA	181492	1	A	SCHMIDT, MICHAEL K	41883	41973	ZCA1-RTRB-Z(M1)	10740459	12	Unavailable	64931884	KUKXRCZ6NZC2	64931884	KUKXRCZ6NZC2	US	40.764045	-73.956024	5079202	SLOAN KETTERING INST CAN RES		Non_Elite	female	99	NEW YORK	NY	Research Institutes	100656007	UNITED STATES	N	41883	41973	398	Other Research-Related	2014	103097	NCI	103097	#N/A
NIMH	8708216	41843	PA-11-197	5K99MH101240-02	5	K99	MH	101240	2		DESMOND, NANCY L	41487	42216	ZMH1-ERB-L(03)	7251875	9	Unavailable	67717892	JL4JHE9SDRR3	67717892	JL4JHE9SDRR3	US	35.155607	-90.045279	7893501	ST JUDE CHILDRENS RES HOSP		Non_Elite	female	95	MEMPHIS	TN	Independent Hospitals	381053678	UNITED STATES	N	41852	42216	242	Other Research-Related	2014	88265	NIMH	88265	coastal
NIGMS	8733740	41844	PA-11-197	5K99GM105874-02	5	K99	GM	105874	2		HAMLET, MICHELLE R	41530	42369	ZGM1-TRN-X(KR)	9816882	7	BIOLOGY	605799469	HD1WMN6945W6	605799469	HD1WMN6945W6	US	47.660307	-122.315168	9087701	U OF WASHINGTON		Elite	female	98	SEATTLE	WA	SCHOOLS OF ARTS AND SCIENCES	981959472	UNITED STATES	N	41852	42369	859	Other Research-Related	2014	84919	NIGMS	84919	#N/A
NLM	8707556	41844	PA-11-197	5K99LM011595-02	5	K99	LM	11595	2		YE, JANE	41487	42216	Biomedical Informatics, Library and Data Sciences Review Committee[BLR]	10641231	7	MISCELLANEOUS	47006379	JDLVAVGYJQ21	47006379	JDLVAVGYJQ21	US	42.335672	-71.104237	3212902	HARVARD MED SCH		Elite	female	98	BOSTON	MA	SCHOOLS OF MEDICINE	21201616	UNITED STATES	N	41852	42216	879	Other Research-Related	2014	89641	NLM	89641	coastal
NHLBI	8791428	41844	PA-11-197	1K99HL122365-01A1	1	K99	HL	122365	1	A	COLOMBINI-HATCH, SANDRA	41852	42216	ZHL1-CSR-P(M1)	8840261	11	PATHOLOGY	77758407	HJMKEF7EJW69	77758407	HJMKEF7EJW69	US	41.502739	-81.607334	218601	CASE WESTERN RESERVE U		Non_Elite	female	93	CLEVELAND	OH	SCHOOLS OF MEDICINE	441061712	UNITED STATES	N	41852	42216	837	Other Research-Related	2014	130680	NHLBI	130680	#N/A
NHLBI	8710340	41849	PA-11-197	5K99HL119587-02	5	K99	HL	119587	2		HUANG, LI-SHIN	41487	42216	ZHL1-CSR-P(M2)	10564907	13	INTERNAL MEDICINE/MEDICINE	621889815	QHF5ZZ114M72	621889815	QHF5ZZ114M72	US	40.8415	-73.9414	1833205	COLUMBIA U HEALTH SCI		Elite	female	97	NEW YORK	NY	SCHOOLS OF MEDICINE	100323725	UNITED STATES	N	41852	42216	837	Other Research-Related	2014	108000	NHLBI	108000	coastal
NIBIB	8710218	41850	PA-11-197	5K99EB016059-02	5	K99	EB	16059	2		ERIM, ZEYNEP	41487	42216	ZEB1-OSR-B(M2)	10355176	18	RADIATION-DIAGNOSTIC/ONCOLOGY	9214214	HJD6G4D6TJY5	9214214	HJD6G4D6TJY5	US	37.426852	-122.17047	8046501	STANFORD U		Elite	female	98	STANFORD	CA	SCHOOLS OF MEDICINE	943052004	UNITED STATES	N	41852	42216	286	Other Research-Related	2014	90000	NIBIB	90000	coastal
NHGRI	8700855	41850	PA-11-197	1K99HG007368-01A1	1	K99	HG	7368	1	A	GOOD, PETER J	41852	42216	Genome Research Study Section[GNOM-G]	11260773	1	GENETICS	5421136	ZUE9HKT2CLC9	5421136	ZUE9HKT2CLC9	US	41.789554	-87.601172	1413601	U OF CHICAGO		Elite	female	97	CHICAGO	IL	SCHOOLS OF MEDICINE	606372612	UNITED STATES	N	41852	42216	172	Other Research-Related	2014	87881	NHGRI	87881	#N/A
NIDCR	8734378	41850	PA-11-197	5K99DE023833-02	5	K99	DE	23833	2		FRIEDEN, LESLIE A	41530	42460	NIDCR Special Grants Review Committee[DSR]	8784088	3	DENTISTRY	969663814	NNFQH1JAPEP3	969663814	NNFQH1JAPEP3	US	29.643443	-82.349637	513806	U OF FLORIDA		Non_Elite	female	98	GAINESVILLE	FL	SCHOOLS OF DENTISTRY/ORAL HYGN	326115500	UNITED STATES	N	41883	42460	121	Other Research-Related	2014	108000	NIDCR	108000	coastal
NIAAA	8723709	41852	PA-11-197	5K99AA022385-02	5	K99	AA	22385	2		PARSIAN, ABBAS	41518	42028	Epidemiology, Prevention and Behavior Research Study Section[AA-2]	8821259	4	PSYCHIATRY	105300446	MLQFL4JSSAA9	105300446	MLQFL4JSSAA9	US	37.549807	-77.452775	353201	VIRGINIA COMMONWEALTH U	2029	Non_Elite	female	96	RICHMOND	VA	SCHOOLS OF MEDICINE	232980568	UNITED STATES	N	41883	42028	273	Other Research-Related	2014	73103	NIAAA	73103	coastal
NIAAA	8728705	41852	PA-11-197	5K99AA021803-02	5	K99	AA	21803	2		JUNG, KATHY	41518	42338	Biomedical Research Study Section[AA-1]	8868638	5	INTERNAL MEDICINE/MEDICINE	66469933	S352L5PJLMP8	66469933	S352L5PJLMP8	US	33.791247	-84.3249	2384501	EMORY U		Non_Elite	female	98	ATLANTA	GA	SCHOOLS OF MEDICINE	303221007	UNITED STATES	N	41883	42338	273	Other Research-Related	2014	113665	NIAAA	113665	coastal
NCI	8726947	41856	PA-11-197	5K99CA178190-02	5	K99	CA	178190	2		SCHMIDT, MICHAEL K	41518	42247	Transition to Independence Study Section (I)[NCI-I]	11517583	4	OTHER BASIC SCIENCES	608195277	D3LHU66KBLD5	608195277	D3LHU66KBLD5	US	35.9316	-79.057377	578206	U OF NORTH CAROLINA CHAPEL HILL		Elite	female	93	CHAPEL HILL	NC	SCHOOLS OF MEDICINE	275995023	UNITED STATES	N	41883	42247	398	Other Research-Related	2014	110956	NCI	110956	coastal
NCI	8722508	41857	PA-11-197	5K99CA178206-02	5	K99	CA	178206	2		SCHMIDT, MICHAEL K	41518	42551	Transition to Independence Study Section (I)[NCI-I]	10300099	3	Unavailable	65968786	GV31TMFLPY88	65968786	GV31TMFLPY88	US	40.86755	-73.473456	4577101	COLD SPRING HARBOR lab		Non_Elite	female	98	COLD SPRING HARBOR	NY	Research Institutes	117242209	UNITED STATES	N	41883	42551	398	Other Research-Related	2014	106008	NCI	106008	#N/A
NCI	8734350	41857	PA-11-197	5K99CA178207-02	5	K99	CA	178207	2		SCHMIDT, MICHAEL K	41530	41973	Transition to Independence Study Section (I)[NCI-I]	10405896	9	Unavailable	67717892	JL4JHE9SDRR3	67717892	JL4JHE9SDRR3	US	35.155607	-90.045279	7893501	ST JUDE CHILDRENS RES HOSP		Non_Elite	female	98	MEMPHIS	TN	Independent Hospitals	381053678	UNITED STATES	N	41883	41973	398	Other Research-Related	2014	102574	NCI	102574	coastal
NCI	8735103	41857	PA-11-197	5K99CA178177-02	5	K99	CA	178177	2		SCHMIDT, MICHAEL K	41534	42308	Transition to Independence Study Section (I)[NCI-I]	10305047	6	BIOLOGY	937727907	SN7KD2UK7GC5	937727907	SN7KD2UK7GC5	US	36.059402	-80.321981	9021205	WAKE FOREST U HEALTH SCI		Non_Elite	female	96	WINSTON-SALEM	NC	SCHOOLS OF MEDICINE	271570001	UNITED STATES	N	41883	42308	398	Other Research-Related	2014	90353	NCI	90353	coastal
NINDS	8722642	41864	PA-11-197	5K99NS083627-02	5	K99	NS	83627	2		MAMOUNAS, LAURA	41518	42247	NST-2 Study Section [NST-2]	10551584	7	GENETICS	605799469	HD1WMN6945W6	605799469	HD1WMN6945W6	US	47.660307	-122.315168	9087701	U OF WASHINGTON		Elite	female	99	SEATTLE	WA	SCHOOLS OF MEDICINE	981959472	UNITED STATES	N	41883	42247	853	Other Research-Related	2014	90000	NINDS	90000	coastal
NICHD	8734268	41866	PA-11-197	5K99HD071972-02	5	K99	HD	71972	2		MOSS, STUART B	41532	42185	Reproduction, Andrology, and Gynecology Study Section[CHHD-R]	8875706	5	BIOLOGY	82359691	LN53LCFJFL45	82359691	LN53LCFJFL45	US	42.369697	-71.11193	3212901	HARVARD U		Elite	female	98	CAMBRIDGE	MA	SCHOOLS OF ARTS AND SCIENCES	21385369	UNITED STATES	N	41883	42185	77	Other Research-Related	2014	130248	NICHD	130248	coastal
NIDDK	8717658	41866	PA-11-197	5K99DK097455-02	5	K99	DK	97455	2		HAFT, CAROL R	41501	42263	Diabetes, Endocrinology and Metabolic Diseases B Study Section[DDK-B]	11286487	13	INTERNAL MEDICINE/MEDICINE	621889815	QHF5ZZ114M72	621889815	QHF5ZZ114M72	US	40.8415	-73.9414	1833205	COLUMBIA U HEALTH SCI		Elite	female	51	NEW YORK	NY	SCHOOLS OF MEDICINE	100323725	UNITED STATES	N	41866	42263	847	Other Research-Related	2014	90000	NIDDK	90000	#N/A
AHRQ	8728169	41869	RFA-HS-13-002	5K99HS022404-02	5	K99	HS	22404	2		WILLIS, TAMARA	41518	42247	ZHS1-HSR-C(01)	10661874	53	Unavailable	849289806	L5Z4F1VY5EE5	849289806	L5Z4F1VY5EE5	US	32.79849	-117.152153	3836803	RADY CHILDRENS HOSP SAN DIEGO		Non_Elite	female	98	SAN DIEGO	CA	Independent Hospitals	921234223	UNITED STATES	N	41883	42247	226	Other Research-Related	2014	142604	AHRQ	142604	coastal
AHRQ	8728171	41869	RFA-HS-13-002	5K99HS022433-02	5	K99	HS	22433	2		WILLIS, TAMARA	41518	42247	ZHS1-HSR-C(01)	9651175	1	INTERNAL MEDICINE/MEDICINE	5421136	ZUE9HKT2CLC9	5421136	ZUE9HKT2CLC9	US	41.789554	-87.601172	1413601	U OF CHICAGO		Elite	female	87	CHICAGO	IL	SCHOOLS OF MEDICINE	606372612	UNITED STATES	N	41883	42247	226	Other Research-Related	2014	119919	AHRQ	119919	coastal
NCI	8710112	41870	PA-11-197	5K99CA175290-02	5	K99	CA	175290	2		SCHMIDT, MICHAEL K	41487	42035	Transition to Independence Study Section (I)[NCI-I]	10338943	7	Unavailable	76580745	DPMGH9MG1X67	76580745	DPMGH9MG1X67	US	42.337593	-71.108279	1464901	DANA FARBER CANCER INST		Elite	female	69	BOSTON	MA	Independent Hospitals	22155450	UNITED STATES	N	41852	42035	398	Other Research-Related	2014	112476	NCI	112476	coastal
NIEHS	8730653	41870	PA-11-197	5K99ES022243-02	5	K99	ES	22243	2		HOLLANDER, JONATHAN	41522	42338	ZES1-JAB-J(K9)	10405832	7	Unavailable	71723621	C1CPANL3EWK4	71723621	C1CPANL3EWK4	US	42.33982	-71.10568	758101	BETH ISRAEL DEACONESS MED CTR		Elite	female	99	BOSTON	MA	Independent Hospitals	22155400	UNITED STATES	N	41883	42338	113	Other Research-Related	2014	89974	NIEHS	89974	coastal
NEI	8704941	41871	PA-11-197	5K99EY023268-02	5	K99	EY	23268	2		AGARWAL, NEERAJ	41487	42124	ZEY1-VSN(07)	8199739	7	PSYCHOLOGY	605799469	HD1WMN6945W6	605799469	HD1WMN6945W6	US	47.660307	-122.315168	9087701	U OF WASHINGTON		Elite	female	68	SEATTLE	WA	SCHOOLS OF ARTS AND SCIENCES	981959472	UNITED STATES	N	41883	42124	867	Other Research-Related	2014	95693	NEI	95693	#N/A
NIMH	8725739	41871	PA-11-197	5K99MH101255-02	5	K99	MH	101255	2		DESMOND, NANCY L	41518	41943	ZMH1-ERB-L(03)	11598907	3	Unavailable	110565913	C5LHMPRJ9J19	110565913	C5LHMPRJ9J19	US	40.775574	-73.703024	4155008	FEINSTEIN INST FOR MED RES		Non_Elite	female	90	MANHASSET	NY	Research Institutes	110303816	UNITED STATES	N	41883	41943	242	Other Research-Related	2014	89999	NIMH	89999	coastal
NICHD	8712230	41871	PA-11-197	5K99HD076935-02	5	K99	HD	76935	2		JAVOIS, LORETTE CLAIRE	41492	42216	Developmental Biology Study Section[CHHD-C]	11565968	5	MICROBIOLOGY/IMMUN/VIROLOGY	82359691	LN53LCFJFL45	82359691	LN53LCFJFL45	US	42.369697	-71.11193	3212901	HARVARD U		Elite	female	54	CAMBRIDGE	MA	SCHOOLS OF ARTS AND SCIENCES	21385369	UNITED STATES	N	41852	42216	865	Other Research-Related	2014	114866	NICHD	114866	coastal
NIEHS	8732652	41872	PA-11-197	5K99ES022631-02	5	K99	ES	22631	2		DILWORTH, CAROLINE H	41527	42010	ZES1-SET-J(K9)	11396140	7	BIOSTATISTICS & OTHER MATH SCI	1910777	FTMTDMBR29C7	1910777	FTMTDMBR29C7	US	39.325256	-76.605131	4134401	JOHNS HOPKINS U		Elite	female	97	BALTIMORE	MD	SCHOOLS OF PUBLIC HEALTH	212182680	UNITED STATES	N	41883	42010	113	Other Research-Related	2014	74733	NIEHS	74733	#N/A
NCI	8740474	41873	PA-11-197	5K99CA179137-02	5	K99	CA	179137	2		SCHMIDT, MICHAEL K	41541	42400	Transition to Independence Study Section (I)[NCI-I]	10353648	9	PATHOLOGY	51113330	FXKMA43NTV21	51113330	FXKMA43NTV21	US	29.70926	-95.400851	481201	BAYLOR COLL OF MED		Non_Elite	female	52	HOUSTON	TX	SCHOOLS OF MEDICINE	770303411	UNITED STATES	N	41883	42400	398	Other Research-Related	2014	95826	NCI	95826	coastal
NIEHS	8730652	41873	PA-11-197	5K99ES021470-02	5	K99	ES	21470	2		FINN, SYMMA	41522	42460	ZES1-LKB-K(K)	10734663	18	PEDIATRICS	9214214	HJD6G4D6TJY5	9214214	HJD6G4D6TJY5	US	37.426852	-122.17047	8046501	STANFORD U		Elite	female	98	STANFORD	CA	SCHOOLS OF MEDICINE	943052004	UNITED STATES	N	41883	42460	113	Other Research-Related	2014	126823	NIEHS	126823	#N/A
NINDS	8738732	41873	PA-11-197	5K99NS085037-02	5	K99	NS	85037	2		RIDDLE, ROBERT D	41546	42429	NST-2 Study Section [NST-2]	11693228	12	NEUROSCIENCES	121911077	M5SZJ6VHUHN8	121911077	M5SZJ6VHUHN8	US	40.669895	-73.974354	5998304	NEW YORK U SCH OF MED		Elite	female	91	NEW YORK	NY	SCHOOLS OF MEDICINE	10016	UNITED STATES	N	41883	42429	853	Other Research-Related	2014	86387	NINDS	86387	coastal
NICHD	8730709	41876	PA-11-197	5K99HD076444-02	5	K99	HD	76444	2		PARISI, MELISSA	41526	42094	Developmental Biology Study Section[CHHD-C]	9166011	12	Unavailable	64931884	KUKXRCZ6NZC2	64931884	KUKXRCZ6NZC2	US	40.764045	-73.956024	5079202	SLOAN KETTERING INST CAN RES		Non_Elite	female	98	NEW YORK	NY	Research Institutes	100656007	UNITED STATES	N	41883	42094	865	Other Research-Related	2014	95998	NICHD	95998	coastal
NIMH	8722630	41877	PA-11-197	5K99MH101338-02	5	K99	MH	101338	2		DESMOND, NANCY L	41518	42613	ZMH1-ERB-L(03)	9700065	3	PSYCHIATRY	47120084	TX2DAGQPENZ5	47120084	TX2DAGQPENZ5	US	38.543366	-121.72946	577503	U OF CALIFORNIA AT DAVIS		Non_Elite	female	99	DAVIS	CA	SCHOOLS OF MEDICINE	956186153	UNITED STATES	N	41883	42613	242	Other Research-Related	2014	81710	NIMH	81710	coastal
NINR	8743826	41878	PA-11-197	5K99NR014369-02	5	K99	NR	14369	2		HUSS, KAREN	41544	42247	Nursing Science Review Committee[NRRC(57)]	8722427	7	OTHER HEALTH PROFESSIONS	98987217	W8XEAJDKMXH3	98987217	W8XEAJDKMXH3	US	41.871509	-87.667721	577703	U OF ILLINOIS AT CHICAGO		Non_Elite	female	98	Chicago	IL	SCHOOLS OF NURSING	606124305	UNITED STATES	N	41883	42247	361	Other Research-Related	2014	99295	NINR	99295	coastal
NCI	8679875	41880	PA-11-197	1K99CA184415-01	1	K99	CA	184415	1		SCHMIDT, MICHAEL K	41883	42247	Transition to Independence Study Section (I)[NCI-I]	10913488	37	PUBLIC HEALTH & PREV MEDICINE	72933393	G88KLJR3KYT5	72933393	G88KLJR3KYT5	US	34.017282	-118.281254	7636101	U OF SOUTHERN CALIFORNIA		Non_Elite	female	98	Los Angeles	CA	SCHOOLS OF MEDICINE	900894304	UNITED STATES	N	41883	42247	398	Other Research-Related	2014	96955	NCI	96955	coastal
NIGMS	8727084	41883	PA-11-197	7K99GM107355-02	7	K99	GM	107355	2		FLICKER, PAULA F	41518	42216	ZGM1-TRN-X(KR)	10261658	7	PHARMACOLOGY	605799469	HD1WMN6945W6	605799469	HD1WMN6945W6	US	47.660307	-122.315168	9087701	U OF WASHINGTON		Elite	female	98	SEATTLE	WA	SCHOOLS OF MEDICINE	981959472	UNITED STATES	N	41883	42216	859	Other Research-Related	2014	85690	NIGMS	85690	coastal
NINDS	8731285	41885	PA-11-197	5K99NS083758-02	5	K99	NS	83758	2		RIDDLE, ROBERT D	41533	42247	NST-2 Study Section [NST-2]	8504731	49	Unavailable	78731668	NNJ6BMBTFGN5	78731668	NNJ6BMBTFGN5	US	32.8863	-117.243929	7210001	SALK INST FOR BIOLOGICAL STUDIES		Non_Elite	female	98	La Jolla	CA	Research Institutes	920371002	UNITED STATES	N	41883	42247	853	Other Research-Related	2014	86260	NINDS	86260	#N/A
NIGMS	8618700	41885	PA-11-197	1K99GM108867-01	1	K99	GM	108867	1		SESMA, MICHAEL A	41897	42247	ZGM1-TRN-Y(KR)	10877007	27	NONE	9584210	U2JMKHNS5TG4	9584210	U2JMKHNS5TG4	US	34.134332	-118.12652	1073501	CALIFORNIA INST OF TECHNOLOGY		Elite	female	68	PASADENA	CA	SCHOOLS OF ARTS AND SCIENCES	911250001	UNITED STATES	N	41897	42247	859	Other Research-Related	2014	90000	NIGMS	90000	#N/A
NIDDK	8713989	41891	PA-11-197	5K99DK097141-02	5	K99	DK	97141	2		HYDE, JAMES F	41501	42004	Diabetes, Endocrinology and Metabolic Diseases B Study Section[DDK-B]	11166217	12	ANATOMY/CELL BIOLOGY	121911077	M5SZJ6VHUHN8	121911077	M5SZJ6VHUHN8	US	40.669895	-73.974354	5998304	NEW YORK U SCH OF MED		Elite	female	98	NEW YORK	NY	SCHOOLS OF MEDICINE	10016	UNITED STATES	N	41866	42004	847	Other Research-Related	2014	87692	NIDDK	87692	coastal
NHLBI	8787792	41960	PA-11-197	5K99HL121284-02	5	K99	HL	121284	2		WANG, WAYNE C	41628	42338	ZHL1-CSR-P(O1)	11676241	1	Unavailable	71284913	JZD1HLM2ZU83	71284913	JZD1HLM2ZU83	US	39.140663	-84.501007	615001	CINCINNATI CHILDRENS HOSP MED CTR		Non_Elite	female	99	CINCINNATI	OH	Independent Hospitals	452293039	UNITED STATES	N	41974	42338	837	Other Research-Related	2015	131085	NHLBI	131085	coastal
NHLBI	8785700	41967	PA-11-197	5K99HL118154-02	5	K99	HL	118154	2		GALIS, ZORINA S	41620	42059	ZHL1-CSR-P(O1)	8624529	1	Unavailable	6471700	Y2K4F9RPRRG7	6471700	Y2K4F9RPRRG7	US	44.02432	-92.46011	4976101	MAYO CLINIC ROCHESTER		Non_Elite	female	97	ROCHESTER	MN	Other Domestic Non-Profits	559050001	UNITED STATES	N	41974	42059	837	Other Research-Related	2015	90000	NHLBI	90000	coastal
NCI	8792201	42012	PA-11-197	5K99CA175291-02	5	K99	CA	175291	2		SCHMIDT, MICHAEL K	41671	42338	Transition to Independence Study Section (I)[NCI-I]	9659252	11	OTHER BASIC SCIENCES	135781701	M5QFLTCTSQN6	135781701	M5QFLTCTSQN6	US	41.502657	-81.622127	10000858	CLEVELAND CLINIC LERNER COM CWRU		Non_Elite	female	99	CLEVELAND	OH	SCHOOLS OF MEDICINE	441950001	UNITED STATES	N	42036	42338	398	Other Research-Related	2015	90934	NCI	90934	coastal
NCI	8792374	42024	PA-11-197	5K99CA181500-02	5	K99	CA	181500	2		SCHMIDT, MICHAEL K	41671	42338	Transition to Independence Study Section (I)[NCI-I]	10310607	8	Unavailable	73130411	FLJ7DQKLL226	73130411	FLJ7DQKLL226	US	42.363198	-71.068772	4907701	MASSACHUSETTS GENERAL HOSP		Elite	female	98	BOSTON	MA	Independent Hospitals	21142621	UNITED STATES	N	42036	42338	393	Other Research-Related	2015	172962	NCI	172962	coastal
NIEHS	8795717	42026	PA-11-197	5K99ES023474-02	5	K99	ES	23474	2		DILWORTH, CAROLINE H	41671	42247	ZES1-LWJ-D(K9)	10743765	13	PUBLIC HEALTH & PREV MEDICINE	78861598	C8H9CNG1VBD9	78861598	C8H9CNG1VBD9	US	40.790284	-73.946781	3839801	ICAHN SCH OF MED AT MOUNT SINAI		Non_Elite	female	54	NEW YORK	NY	SCHOOLS OF MEDICINE	100296574	UNITED STATES	N	42036	42247	113	Other Research-Related	2015	119200	NIEHS	119200	coastal
NHLBI	8833333	42026	PA-11-197	5K99HL119567-02	5	K99	HL	119567	2		GALIS, ZORINA S	41733	42429	ZHL1-CSR-P(F1)	8574157	5	INTERNAL MEDICINE/MEDICINE	66469933	S352L5PJLMP8	66469933	S352L5PJLMP8	US	33.791247	-84.3249	2384501	EMORY U		Non_Elite	female	98	ATLANTA	GA	SCHOOLS OF MEDICINE	303221007	UNITED STATES	N	42064	42429	837	Other Research-Related	2015	98436	NHLBI	98436	coastal
NIEHS	8793788	42033	PA-11-197	5K99ES023477-02	5	K99	ES	23477	2		SCHUG, THADDEUS	41671	42400	ZES1-LWJ-D(K9)	9842149	98	PHARMACOLOGY	43990498	ECR5E2LU5BL6	43990498	ECR5E2LU5BL6	US	38.898075	-77.043933	2863301	GEORGE WASHINGTON U		Non_Elite	female	93	WASHINGTON	DC	SCHOOLS OF MEDICINE	200520042	UNITED STATES	N	42036	42400	113	Other Research-Related	2015	104963	NIEHS	104963	coastal
NICHD	8796207	42043	PA-11-197	5K99HD075858-02	5	K99	HD	75858	2		ILEKIS, JOHN V	41671	42400	Obstetrics and Maternal-Fetal Biology Study Section[CHHD-B]	10243582	9	OBSTETRICS & GYNECOLOGY	51113330	FXKMA43NTV21	51113330	FXKMA43NTV21	US	29.70926	-95.400851	481201	BAYLOR COLL OF MED		Non_Elite	female	98	HOUSTON	TX	SCHOOLS OF MEDICINE	770303411	UNITED STATES	N	42036	42400	865	Other Research-Related	2015	74472	NICHD	74472	coastal
NHLBI	8831730	42044	PA-11-197	5K99HL122508-02	5	K99	HL	122508	2		CARLSON, DREW E	41733	42766	ZHL1-CSR-P(F1)	10467763	12	PSYCHIATRY	94878337	KMH5K9V7S518	94878337	KMH5K9V7S518	US	37.767442	-122.413937	577508	U OF CALIFORNIA SAN FRANCISCO		Elite	female	98	SAN FRANCISCO	CA	SCHOOLS OF MEDICINE	941432510	UNITED STATES	N	42064	42766	837	Other Research-Related	2015	134325	NHLBI	134325	#N/A
NIDCR	8831640	42052	PA-11-197	5K99DE024214-02	5	K99	DE	24214	2		FRIEDEN, LESLIE A	41733	42597	NIDCR Special Grants Review Committee[DSR]	10477196	12	DENTISTRY	94878337	KMH5K9V7S518	94878337	KMH5K9V7S518	US	37.767442	-122.413937	577508	U OF CALIFORNIA SAN FRANCISCO		Elite	female	98	SAN FRANCISCO	CA	SCHOOLS OF DENTISTRY/ORAL HYGN	941432510	UNITED STATES	N	42095	42597	121	Other Research-Related	2015	101168	NIDCR	101168	#N/A
NCI	8815283	42054	PA-11-197	5K99CA181496-02	5	K99	CA	181496	2		SCHMIDT, MICHAEL K	41701	42429	Transition to Independence Study Section (I)[NCI-I]	11718725	13	ANATOMY/CELL BIOLOGY	78861598	C8H9CNG1VBD9	78861598	C8H9CNG1VBD9	US	40.790284	-73.946781	3839801	ICAHN SCH OF MED AT MOUNT SINAI		Non_Elite	female	51	NEW YORK	NY	SCHOOLS OF MEDICINE	100296574	UNITED STATES	N	42064	42429	398	Other Research-Related	2015	101520	NCI	101520	coastal
NIDCR	8824510	42061	PAR-12-283	5K99DE024178-02	5	K99	DE	24178	2		FRIEDEN, LESLIE A	41730	42825	NIDCR Special Grants Review Committee[DSR]	8063847	12	PHYSIOLOGY	73133571	GNJ7BBP73WE9	73133571	GNJ7BBP73WE9	US	42.275494	-83.743038	1506502	U OF MICHIGAN AT ANN ARBOR		Elite	female	98	ANN ARBOR	MI	SCHOOLS OF MEDICINE	481091276	UNITED STATES	N	42095	42825	121	Other Research-Related	2015	101412	NIDCR	101412	coastal
NINDS	8823839	42081	PA-11-197	5K99NS087112-02	5	K99	NS	87112	2		MAMOUNAS, LAURA	41730	42460	NST-2 Study Section [NST-2]	10514816	12	NEUROSCIENCES	41968306	NX9PXMKW5KW8	41968306	NX9PXMKW5KW8	US	40.729659	-73.997018	5998301	NEW YORK U		Elite	female	98	NEW YORK	NY	SCHOOLS OF ARTS AND SCIENCES	100122300	UNITED STATES	N	42095	42460	853	Other Research-Related	2015	81581	NINDS	81581	coastal
NIDA	8828151	42083	PA-11-197	5K99DA036012-02	5	K99	DA	36012	2		LIN, YU	41730	42460	ZDA1-EXL-T(02)S	10336908	2	PHARMACOLOGY	9095365	LL8GLEVH6MG3	9095365	LL8GLEVH6MG3	US	40.764542	-111.850317	514002	U OF UTAH		Non_Elite	female	98	SALT LAKE CITY	UT	SCHOOLS OF PHARMACY	841128906	UNITED STATES	N	42095	42460	279	Other Research-Related	2015	125272	NIDA	125272	coastal
NIMH	8828300	42083	PA-11-197	5K99MH101235-02	5	K99	MH	101235	2		CHAVEZ, MARK	41730	42460	ZMH1-ERB-L(02)	11570650	1	Unavailable	967230579	MX8ULDF6SDD6	967230579	MX8ULDF6SDD6	US	36.066243	-95.919455	10029961	LAUREATE INST FOR BRAIN RES		Non_Elite	female	77	TULSA	OK	Research Institutes	741363326	UNITED STATES	N	42095	42460	242	Other Research-Related	2015	88973	NIMH	88973	coastal
NEI	8867696	42093	PA-14-042	1K99EY025290-01	1	K99	EY	25290	1		NEUHOLD, LISA	42125	42490	ZEY1-VSN(03)	11490559	13	BIOCHEMISTRY	621889815	QHF5ZZ114M72	621889815	QHF5ZZ114M72	US	40.8415	-73.9414	1833205	COLUMBIA U HEALTH SCI		Elite	female	97	NEW YORK	NY	SCHOOLS OF MEDICINE	100323725	UNITED STATES	N	42125	42490	867	Other Research-Related	2015	105840	NEI	105840	coastal
NIGMS	8841781	42094	PA-11-197	5K99GM108865-02	5	K99	GM	108865	2		SESMA, MICHAEL A	41760	42671	ZGM1-TRN-Y(KR)	11135146	52	INTERNAL MEDICINE/MEDICINE	804355790	UYTTZT6G9DT1	804355790	UYTTZT6G9DT1	US	32.876991	-117.24087	577507	U OF CALIFORNIA SAN DIEGO		Elite	female	98	LA JOLLA	CA	SCHOOLS OF MEDICINE	920930621	UNITED STATES	N	42095	42671	859	Other Research-Related	2015	89996	NIGMS	89996	coastal
NHLBI	8840648	42100	PA-11-197	5K99HL119560-02	5	K99	HL	119560	2		TIGNO, XENIA	41760	42531	ZHL1-CSR-P(F1)	8508067	2	INTERNAL MEDICINE/MEDICINE	62761671	Z1H9VJS8NG16	62761671	Z1H9VJS8NG16	US	41.664405	-91.542152	3972901	U OF IOWA		Non_Elite	female	99	IOWA CITY	IA	SCHOOLS OF MEDICINE	522421320	UNITED STATES	N	42125	42531	837	Other Research-Related	2015	97200	NHLBI	97200	coastal
NIA	8916537	42102	PA-11-197	5K99AG047963-02	5	K99	AG	47963	2		KING, JONATHAN W	41883	42613	Basic Neuroscience of Aging Study Section[NIA-N]	10809200	13	NEUROLOGY	621889815	QHF5ZZ114M72	621889815	QHF5ZZ114M72	US	40.8415	-73.9414	1833205	COLUMBIA U HEALTH SCI		Elite	female	98	NEW YORK	NY	SCHOOLS OF MEDICINE	100323725	UNITED STATES	N	42125	42613	866	Other Research-Related	2015	132253	NIA	132253	coastal
NICHD	8840289	42110	PA-11-197	5K99HD077058-02	5	K99	HD	77058	2		FREUND, LISA S	41760	42674	Biobehavioral and Behavioral Sciences Study Section[CHHD-H]	9559979	7	MISCELLANEOUS	1910777	FTMTDMBR29C7	1910777	FTMTDMBR29C7	US	39.325256	-76.605131	4134401	JOHNS HOPKINS U		Elite	female	98	BALTIMORE	MD	SCHOOLS OF PUBLIC HEALTH	212182680	UNITED STATES	N	42125	42674	865	Other Research-Related	2015	126748	NICHD	126748	coastal
NIA	8826006	42115	PA-11-197	5K99AG047334-02	5	K99	AG	47334	2		WAGSTER, MOLLY V	41730	42551	Basic Neuroscience of Aging Study Section[NIA-N]	8819116	45	OTHER BASIC SCIENCES	46705849	MJC5FCYQTPE6	46705849	MJC5FCYQTPE6	US	33.64852	-117.82136	577504	U OF CALIFORNIA IRVINE	1814	Non_Elite	female	99	IRVINE	CA	SCHOOLS OF ARTS AND SCIENCES	926970001	UNITED STATES	N	42125	42551	866	Other Research-Related	2015	105633	NIA	105633	coastal
NINDS	8853349	42117	PA-11-197	5K99NS087096-02	5	K99	NS	87096	2		MAMOUNAS, LAURA	41791	42520	NST-2 Study Section [NST-2]	11124577	7	Unavailable	76580745	DPMGH9MG1X67	76580745	DPMGH9MG1X67	US	42.337593	-71.108279	1464901	DANA FARBER CANCER INST		Elite	female	98	BOSTON	MA	Independent Hospitals	22155450	UNITED STATES	N	42155	42520	853	Other Research-Related	2015	111456	NINDS	111456	coastal
NIBIB	8848378	42121	PA-11-197	5K99EB017729-02	5	K99	EB	17729	2		ERIM, ZEYNEP	41774	42735	ZEB1-OSR-E(O1)P	11377077	18	RADIATION-DIAGNOSTIC/ONCOLOGY	9214214	HJD6G4D6TJY5	9214214	HJD6G4D6TJY5	US	37.426852	-122.17047	8046501	STANFORD U		Elite	female	58	STANFORD	CA	SCHOOLS OF MEDICINE	943052004	UNITED STATES	N	42125	42735	286	Other Research-Related	2015	91368	NIBIB	91368	coastal
NIA	8919217	42124	PA-11-197	5K99AG048222-02	5	K99	AG	48222	2		WISE, BRADLEY C	41883	42613	Basic Neuroscience of Aging Study Section[NIA-N]	8307398	12	Unavailable	99992430	KH6NJ6ND8737	99992430	KH6NJ6ND8737	US	37.767618	-122.394315	1567601	J DAVID GLADSTONE INSTS		Non_Elite	female	98	SAN FRANCISCO	CA	Research Institutes	941582261	UNITED STATES	N	42125	42613	866	Other Research-Related	2015	134811	NIA	134811	coastal
NIDA	8847699	42125	PA-11-197	5K99DA036569-02	5	K99	DA	36569	2		LIN, YU	41774	42383	ZDA1-EXL-T(02)S	9706320	1	NEUROSCIENCES	183710748	NHV3GTWSALA7	183710748	NHV3GTWSALA7	US	32.786754	-79.947265	7575301	MED U OF SOUTH CAROLINA		Non_Elite	female	98	CHARLESTON	SC	SCHOOLS OF MEDICINE	294074636	UNITED STATES	N	42125	42383	279	Other Research-Related	2015	131054	NIDA	131054	coastal
NIAID	8891698	42125	PA-14-042	1K99AI114884-01A1	1	K99	AI	114884	1	A	GONDRE-LEWIS, TIMOTHY A	42125	42674	Allergy, Immunology, and Transplantation Research Committee[AITC]	11971601	5	PATHOLOGY	555917996	KABJZBBJ4B54	555917996	KABJZBBJ4B54	US	44.975143	-93.227003	1450402	U OF MINNESOTA		Non_Elite	female	63	MINNEAPOLIS	MN	SCHOOLS OF MEDICINE	554552070	UNITED STATES	N	42125	42674	855	Other Research-Related	2015	93510	NIAID	93510	coastal
NICHD	8845464	42131	PA-11-197	5K99HD075860-02	5	K99	HD	75860	2		KING, ROSALIND B	41762	42185	Population Sciences Study Section[CHHD-W]	9587548	4	PUBLIC HEALTH & PREV MEDICINE	608195277	D3LHU66KBLD5	608195277	D3LHU66KBLD5	US	35.9316	-79.057377	578206	U OF NORTH CAROLINA CHAPEL HILL		Elite	female	98	CHAPEL HILL	NC	SCHOOLS OF PUBLIC HEALTH	275995023	UNITED STATES	N	42125	42185	865	Other Research-Related	2015	81234	NICHD	81234	coastal
NIAID	8821700	42131	PA-14-042	1K99AI108787-01A1	1	K99	AI	108787	1	A	ERNST, NANCY L	42132	42855	Microbiology and Infectious Diseases B Research Study Section[MID-B]	11409442	13	BIOCHEMISTRY	621889815	QHF5ZZ114M72	621889815	QHF5ZZ114M72	US	40.8415	-73.9414	1833205	COLUMBIA U HEALTH SCI		Elite	female	97	NEW YORK	NY	SCHOOLS OF MEDICINE	100323725	UNITED STATES	N	42132	42855	855	Other Research-Related	2015	132300	NIAID	132300	coastal
NIDCR	8882392	42138	PA-11-197	5K99DE024543-02	5	K99	DE	24543	2		FRIEDEN, LESLIE A	41821	42643	NIDCR Special Grants Review Committee[DSR]	11404539	33	DENTISTRY	92530369	RN64EPNH8JC6	92530369	RN64EPNH8JC6	US	34.070199	-118.45102	577505	U OF CALIFORNIA LOS ANGELES		Elite	female	98	LOS ANGELES	CA	SCHOOLS OF DENTISTRY/ORAL HYGN	900952000	UNITED STATES	N	42186	42643	121	Other Research-Related	2015	94194	NIDCR	94194	coastal
NIDA	8848058	42138	PA-11-197	5K99DA038589-02	5	K99	DA	38589	2		SIROCCO, KAREN	41791	42521	Biobehavioral and Behavioral Sciences Study Section[CHHD-H]	9457149	5	PSYCHOLOGY	790934285	NPU8ULVAAS23	790934285	NPU8ULVAAS23	US	38.992333	-76.952986	820102	U OF MARYLAND COLL PARK		Non_Elite	female	97	COLLEGE PARK	MD	SCHOOLS OF ARTS AND SCIENCES	207420001	UNITED STATES	N	42156	42521	279	Other Research-Related	2015	123225	NIDA	123225	coastal
NIA	8926343	42139	PA-11-197	5K99AG046370-02	5	K99	AG	46370	2		FRIDELL, YIH-WOEI	41897	42886	Biological Aging Study Section[NIA-B]	10482834	12	PHYSIOLOGY	73133571	GNJ7BBP73WE9	73133571	GNJ7BBP73WE9	US	42.275494	-83.743038	1506502	U OF MICHIGAN AT ANN ARBOR		Elite	female	79	ANN ARBOR	MI	SCHOOLS OF MEDICINE	481091276	UNITED STATES	N	42156	42886	866	Other Research-Related	2015	99139	NIA	99139	coastal
NCI	8849402	42142	PA-11-197	5K99CA184043-02	5	K99	CA	184043	2		SCHMIDT, MICHAEL K	41791	42216	Transition to Independence Study Section (I)[NCI-I]	10320457	18	PATHOLOGY	9214214	HJD6G4D6TJY5	9214214	HJD6G4D6TJY5	US	37.426852	-122.17047	8046501	STANFORD U		Elite	female	98	STANFORD	CA	SCHOOLS OF MEDICINE	943052004	UNITED STATES	N	42156	42216	398	Other Research-Related	2015	171072	NCI	171072	coastal
NCI	8804339	42143	PA-14-042	1K99CA190896-01	1	K99	CA	190896	1		SCHMIDT, MICHAEL K	42143	42247	Transition to Independence Study Section (I)[NCI-I]	10753835	7	BIOLOGY	47006379	JDLVAVGYJQ21	47006379	JDLVAVGYJQ21	US	42.335672	-71.104237	3212902	HARVARD MED SCH		Elite	female	75	BOSTON	MA	SCHOOLS OF MEDICINE	21201616	UNITED STATES	N	42143	42247	398	Other Research-Related	2015	47346	NCI	47346	coastal
NCI	8876619	42159	PA-11-197	5K99CA184411-02	5	K99	CA	184411	2		SCHMIDT, MICHAEL K	41810	42272	Transition to Independence Study Section (I)[NCI-I]	11807514	32	Unavailable	27176833	NPH1VN32EWN5	27176833	NPH1VN32EWN5	US	34.127716	-117.972442	3058203	BECKMAN RES INST/CITY OF HOPE		Non_Elite	female	79	DUARTE	CA	Research Institutes	910103012	UNITED STATES	N	42156	42272	398	Other Research-Related	2015	140253	NCI	140253	#N/A
NICHD	9004888	42160	PA-11-197	7K99HD079545-02	7	K99	HD	79545	2		ILEKIS, JOHN V	41835	42199	Obstetrics and Maternal-Fetal Biology Study Section[CHHD-B]	10519588	4	GENETICS	5309844	DQDBM7FGJPC5	5309844	DQDBM7FGJPC5	US	42.022225	-93.639475	3974801	IOWA STATE U	1506	Non_Elite	female	94	AMES	IA	EARTH SCIENCES/RESOURCES	500112025	UNITED STATES	N	42078	42199	865	Other Research-Related	2014	36472	NICHD	36472	#N/A
NIMH	8851682	42165	PA-11-197	5K99MH102352-02	5	K99	MH	102352	2		CHAVEZ, MARK	41821	42551	ZMH1-ERB-L(05)	10902333	13	Unavailable	167204994	TYVNMW8FNQQ3	167204994	TYVNMW8FNQQ3	US	40.843076	-73.944206	1590919	NEW_YORK_STATE_PSY		Non_Elite	female	95	NEW YORK	NY	Independent Hospitals	100321007	UNITED STATES	N	42186	42551	242	Other Research-Related	2015	131756	NIMH	131756	#N/A
NICHD	8849468	42166	PA-11-197	5K99HD076166-02	5	K99	HD	76166	2		FREUND, LISA S	41821	42247	Biobehavioral and Behavioral Sciences Study Section[CHHD-H]	11387483	25	OTHER BASIC SCIENCES	41294109	F27KDXZMF9Y8	41294109	F27KDXZMF9Y8	US	43.131774	-77.63546	7047101	U OF ROCHESTER		Non_Elite	female	97	ROCHESTER	NY	SCHOOLS OF ARTS AND SCIENCES	146270140	UNITED STATES	N	42186	42247	865	Other Research-Related	2015	82417	NICHD	82417	coastal
NIA	8925766	42166	PA-11-197	5K99AG048762-03	5	K99	AG	48762	3		MACKIEWICZ, MIROSLAW	42005	42521	Behavior and Social Science of Aging Study Section[NIA-S]	11648457	7	PSYCHOLOGY	63690705	YND4PLMC9AN7	63690705	YND4PLMC9AN7	US	33.50591	-86.799772	1288803	U OF ALABAMA AT BIRMINGHAM		Non_Elite	female	95	BIRMINGHAM	AL	SCHOOLS OF ARTS AND SCIENCES	352940001	UNITED STATES	N	42170	42521	866	Other Research-Related	2015	131141	NIA	131141	coastal
NIAID	8966959	42167	PA-14-042	1K99AI114952-01A1	1	K99	AI	114952	1	A	BOYCE, JIM P	42170	42521	Microbiology and Infectious Diseases B Research Study Section[MID-B]	11256374	23	MICROBIOLOGY/IMMUN/VIROLOGY	872612445	G56PUALJ3KT5	872612445	CCV3WG2JG248; D4H1NV4APKP3; ELS2M3C6V2S5; EQA8NBEN9WD5; FFAZGE9NH3M8; G56PUALJ3KT5; K6JRCJJXFET1; M8FBSLHASMT3; P4LRVQT1H4K5; PJUVN8AT5416; RT1JPM9UMGM5; ZBMGUAZYFGC4; ZMP8BDLJTUW9	US	42.438	-76.4625	1514802	CORNELL U		Elite	female	62	ITHACA	NY	SCHOOLS OF VETERINARY MEDICINE	148502820	UNITED STATES	N	42170	42521	855	Other Research-Related	2015	103648	NIAID	103648	coastal
NIAAA	8892795	42172	PA-11-197	5K99AA022661-02	5	K99	AA	22661	2		MATOCHIK, JOHN A	41840	42551	Neuroscience and Behavior Study Section[AA-4]	9840452	53	PSYCHOLOGY	73371346	H59JKGFZKHL7	73371346	H59JKGFZKHL7	US	32.762178	-117.069156	513614	SAN DIEGO STATE U	758	Non_Elite	female	99	SAN DIEGO	CA	SCHOOLS OF ARTS AND SCIENCES	921821901	UNITED STATES	N	42186	42551	273	Other Research-Related	2015	92789	NIAAA	92789	coastal
NIMH	8879220	42177	PA-11-197	5K99MH104716-03	5	K99	MH	104716	3		DESMOND, NANCY L	42086	42247	ZMH1-ERB-L(03)	10243431	6	PSYCHIATRY	78795875	MG5BM5RM42J9	78795875	MG5BM5RM42J9	US	40.530271	-74.470703	10034170	RBHS ROBERT WOOD JOHNSON MED SCH		Non_Elite	female	98	PISCATAWAY	NJ	SCHOOLS OF MEDICINE	88548021	UNITED STATES	N	42186	42247	242	Other Research-Related	2015	30202	NIMH	30202	coastal
NIDA	8866381	42178	PA-14-042	5K99DA037271-02	5	K99	DA	37271	2		LIN, YU	41821	42551	ZDA1-EXL-T(01)S	10810587	5	VETERINARY SCIENCES	41485301	XRJSGX384TD6	41485301	XRJSGX384TD6	US	46.728892	-117.155742	9082001	WASHINGTON STATE U	838	Non_Elite	female	98	PULLMAN	WA	SCHOOLS OF VETERINARY MEDICINE	991641060	UNITED STATES	N	42186	42551	279	Other Research-Related	2015	94438	NIDA	94438	coastal
NINDS	8931100	42178	PA-14-042	5K99NS089858-02	5	K99	NS	89858	2		WHITTEMORE, VICKY R	41912	42582	NST-2 Study Section [NST-2]	11230297	7	Unavailable	605799469	HD1WMN6945W6	605799469	HD1WMN6945W6	US	47.660307	-122.315168	9087701	U OF WASHINGTON		Elite	female	99	SEATTLE	WA	Domestic Higher Education	981959472	UNITED STATES	N	42217	42582	853	Other Research-Related	2015	91098	NINDS	91098	coastal
NIMH	8894619	42178	PA-11-197	5K99MH104712-02	5	K99	MH	104712	2		DESMOND, NANCY L	41838	42551	ZMH1-ERB-L(03)	8840908	12	PHARMACOLOGY	60217502	YNT8TCJH8FQ8	60217502	YNT8TCJH8FQ8	US	40.7607	-73.9603	1514803	WEILL MED COLL OF CORNELL U		Elite	female	99	NEW YORK	NY	SCHOOLS OF MEDICINE	100654805	UNITED STATES	N	42186	42551	242	Other Research-Related	2015	90000	NIMH	90000	coastal
NIDA	8889651	42178	PA-11-197	5K99DA037928-02	5	K99	DA	37928	2		LIN, YU	41835	42582	ZDA1-EXL-T(01)	10587552	8	Unavailable	73130411	FLJ7DQKLL226	73130411	FLJ7DQKLL226	US	42.363198	-71.068772	4907701	MASSACHUSETTS GENERAL HOSP		Elite	female	87	BOSTON	MA	Independent Hospitals	21142621	UNITED STATES	N	42186	42582	279	Other Research-Related	2015	187164	NIDA	187164	coastal
NINDS	8904739	42179	PA-11-197	5K99NS088429-02	5	K99	NS	88429	2		CORRIVEAU, RODERICK A	41866	42352	NST-2 Study Section [NST-2]	8443526	7	Unavailable	30811269	QN6MS4VN7BD1	30811269	QN6MS4VN7BD1	US	42.336107	-71.107481	1080401	BRIGHAM AND WOMENS HOSP		Elite	female	64	BOSTON	MA	Independent Hospitals	21156110	UNITED STATES	N	42217	42352	853	Other Research-Related	2015	92880	NINDS	92880	coastal
NCI	8885779	42180	PA-11-197	5K99CA187594-02	5	K99	CA	187594	2		SCHMIDT, MICHAEL K	41827	42247	Transition to Independence Study Section (I)[NCI-I]	10693943	3	PHARMACOLOGY	43207562	FL6GV84CKN57	43207562	FL6GV84CKN57	US	41.310925	-72.926428	9420201	YALE U		Elite	female	95	NEW HAVEN	CT	SCHOOLS OF MEDICINE	65208327	UNITED STATES	N	42186	42247	398	Other Research-Related	2015	23932	NCI	23932	coastal
NIDA	8860168	42184	PA-11-197	5K99DA038110-02	5	K99	DA	38110	2		LIN, YU	41821	42916	ZDA1-EXL-T(01)	7893193	10	NEUROSCIENCES	69501252	V913TCT2SFZ9	69501252	V913TCT2SFZ9	US	42.302294	-87.861378	1402201	ROSALIND FRANKLIN U OF MED & SCI		Non_Elite	female	98	NORTH CHICAGO	IL	SCHOOLS OF MEDICINE	600643037	UNITED STATES	N	42186	42916	279	Other Research-Related	2015	126415	NIDA	126415	coastal
NHLBI	8901296	42185	PA-11-197	5K99HL124321-03	5	K99	HL	124321	3		REIS, JARED P	41852	42735	ZHL1-CSR-P(M1)	11038675	7	Unavailable	39318308	C1F5LNUF7W86	39318308	C1F5LNUF7W86	US	42.3498	-71.06149	8422704	TUFTS U BOSTON		Non_Elite	female	99	BOSTON	MA	Domestic Higher Education	21111901	UNITED STATES	N	42217	42735	837	Other Research-Related	2015	110849	NHLBI	110849	coastal
NIMH	8880289	42186	PA-11-197	5K99MH102349-02	5	K99	MH	102349	2		SARAMPOTE, CHRISTOPHER S	41821	42551	ZMH1-ERB-L(03)	8959614	7	Unavailable	155342439	DKMDCB5HNBL7	155342439	DKMDCB5HNBL7	US	39.298699	-76.593679	2370003	HUGO W MOSER RES INST KENNEDY KRIEGER		Non_Elite	female	98	BALTIMORE	MD	Research Institutes	212051832	UNITED STATES	N	42186	42551	242	Other Research-Related	2015	92930	NIMH	92930	coastal
NICHD	8887358	42192	PA-11-197	5K99HD080981-02	5	K99	HD	80981	2		PARISI, MELISSA	41830	42372	Developmental Biology Study Section[CHHD-C]	10858064	12	PHYSIOLOGY	94878337	KMH5K9V7S518	94878337	KMH5K9V7S518	US	37.767442	-122.413937	577508	U OF CALIFORNIA SAN FRANCISCO		Elite	female	100	SAN FRANCISCO	CA	SCHOOLS OF MEDICINE	941432510	UNITED STATES	N	42186	42372	865	Other Research-Related	2015	91381	NICHD	91381	coastal
NIGMS	8910767	42200	PA-11-197	5K99GM110332-02	5	K99	GM	110332	2		SESMA, MICHAEL A	41866	42582	ZGM1-TRN-Y(KR)	10872449	2	GENETICS	42092122	U3NVH931QJJ3	42092122	U3NVH931QJJ3; XRPPWZ3TK937	US	35.784675	-78.677233	578204	NORTH CAROLINA STATE U RALEIGH	1656	Non_Elite	female	99	RALEIGH	NC	EARTH SCIENCES/RESOURCES	276957514	UNITED STATES	N	42217	42582	859	Other Research-Related	2015	82253	NIGMS	82253	#N/A
NIAMS	8894412	42208	PA-11-197	5K99AR065480-02	5	K99	AR	65480	2		BAKER, CARL	41852	42369	Arthritis and Musculoskeletal and Skin Diseases Special Grants Study Section[AMS]	10414777	18	DERMATOLOGY	9214214	HJD6G4D6TJY5	9214214	HJD6G4D6TJY5	US	37.426852	-122.17047	8046501	STANFORD U		Elite	female	74	STANFORD	CA	SCHOOLS OF MEDICINE	943052004	UNITED STATES	N	42217	42369	846	Other Research-Related	2015	90000	NIAMS	90000	coastal
NINDS	8862557	42208	PA-11-197	5K99NS086903-02	5	K99	NS	86903	2		RIDDLE, ROBERT D	41821	42613	NST-2 Study Section [NST-2]	9798641	3	ANATOMY/CELL BIOLOGY	96997515	NPSNT86JKN51	96997515	NPSNT86JKN51	US	45.49882	-122.685647	6297007	OREGON HEALTH & SCI U		Non_Elite	female	98	PORTLAND	OR	SCHOOLS OF MEDICINE	972393098	UNITED STATES	N	42186	42613	853	Other Research-Related	2015	90720	NINDS	90720	#N/A
NIMH	8887387	42209	PA-11-197	5K99MH103399-02	5	K99	MH	103399	2		DESMOND, NANCY L	41829	42735	ZMH1-ERB-L(02)	11212694	7	Unavailable	71723621	C1CPANL3EWK4	71723621	C1CPANL3EWK4	US	42.33982	-71.10568	758101	BETH ISRAEL DEACONESS MED CTR		Elite	female	97	BOSTON	MA	Independent Hospitals	22155400	UNITED STATES	N	42209	42735	242	Other Research-Related	2015	83371	NIMH	83371	coastal
NIEHS	8928616	42209	PA-11-197	5K99ES024144-02	5	K99	ES	24144	2		JOUBERT, BONNIE	41899	42400	ZES1-LKB-J(KS)	10576384	2	FAMILY MEDICINE	41027822	EB8ASJBCFER9	41027822	EB8ASJBCFER9	US	43.711386	-72.270611	2021601	DARTMOUTH COLL		Elite	female	98	HANOVER	NH	SCHOOLS OF MEDICINE	37551421	UNITED STATES	N	42248	42400	113	Other Research-Related	2015	89985	NIEHS	89985	coastal
NICHD	8928235	42209	PA-11-197	5K99HD078492-02	5	K99	HD	78492	2		MARDEN, SUSAN F	41898	42613	Function, Integration, and Rehabilitation Sciences Study Section[CHHD-K]	10835448	3	NEUROLOGY	96997515	NPSNT86JKN51	96997515	NPSNT86JKN51	US	45.49882	-122.685647	6297007	OREGON HEALTH & SCI U		Non_Elite	female	99	PORTLAND	OR	SCHOOLS OF MEDICINE	972393098	UNITED STATES	N	42248	42613	865	Other Research-Related	2015	139002	NICHD	139002	coastal
NIEHS	8920576	42209	PA-11-197	5K99ES024417-02	5	K99	ES	24417	2		SHAUGHNESSY, DANIEL	41887	42460	ZES1-LKB-J(KS)	10828874	At-Large	MICROBIOLOGY/IMMUN/VIROLOGY	66811191	Z94KLERAG5V9	66811191	Z94KLERAG5V9	US	44.478282	-73.201079	8738101	U OF VERMONT & ST AGRIC COLL		Non_Elite	female	93	BURLINGTON	VT	SCHOOLS OF MEDICINE	54051704	UNITED STATES	N	42248	42460	113	Other Research-Related	2015	85743	NIEHS	85743	coastal
NINDS	8875791	42213	PA-11-197	5K99NS088572-02	5	K99	NS	88572	2		RIDDLE, ROBERT D	41852	42582	NST-2 Study Section [NST-2]	10711870	12	INTERNAL MEDICINE/MEDICINE	94878337	KMH5K9V7S518	94878337	KMH5K9V7S518	US	37.767442	-122.413937	577508	U OF CALIFORNIA SAN FRANCISCO		Elite	female	98	SAN FRANCISCO	CA	SCHOOLS OF MEDICINE	941432510	UNITED STATES	N	42217	42582	853	Other Research-Related	2015	88020	NINDS	88020	#N/A
NCI	8889231	42213	PA-11-197	5K99CA184397-02	5	K99	CA	184397	2		SCHMIDT, MICHAEL K	41883	42338	Transition to Independence Study Section (I)[NCI-I]	11109221	33	MICROBIOLOGY/IMMUN/VIROLOGY	92530369	RN64EPNH8JC6	92530369	RN64EPNH8JC6	US	34.070199	-118.45102	577505	U OF CALIFORNIA LOS ANGELES		Elite	female	98	LOS ANGELES	CA	SCHOOLS OF MEDICINE	900952000	UNITED STATES	N	42248	42338	398	Other Research-Related	2015	138861	NCI	138861	#N/A
NIA	8820518	42213	PA-14-042	1K99AG047282-01A1	1	K99	AG	47282	1	A	WAGSTER, MOLLY V	42217	42582	Basic Neuroscience of Aging Study Section[NIA-N]	9209680	4	NUTRITION	5309844	DQDBM7FGJPC5	5309844	DQDBM7FGJPC5	US	42.022225	-93.639475	3974801	IOWA STATE U		Non_Elite	female	84	AMES	IA	SCH OF HOME ECON/HUMAN ECOLOGY	500112025	UNITED STATES	N	42217	42582	866	Other Research-Related	2015	134730	NIA	134730	#N/A
NCI	8919852	42214	PA-11-197	5K99CA175181-02	5	K99	CA	175181	2		DASCHNER, PHILLIP J	41883	42613	Transition to Independence Study Section (I)[NCI-I]	10345899	3	NONE	96997515	NPSNT86JKN51	96997515	NPSNT86JKN51	US	45.49882	-122.685647	6297007	OREGON HEALTH & SCI U		Non_Elite	female	99	PORTLAND	OR	OVERALL MEDICAL	972393098	UNITED STATES	N	42248	42613	398	Other Research-Related	2015	99351	NCI	99351	coastal
NIDCD	8936409	42215	PA-14-042	5K99DC013795-02	5	K99	DC	13795	2		COOPER, JUDITH	41909	42613	Communication Disorders Review Committee[CDRC]	10055146	3	PSYCHOLOGY	806345617	ED44Y3W6P7B9	806345617	ED44Y3W6P7B9	US	32.232844	-110.959467	490201	U OF ARIZONA		Non_Elite	female	99	TUCSON	AZ	SCHOOLS OF ARTS AND SCIENCES	857210158	UNITED STATES	N	42248	42613	173	Other Research-Related	2015	94791	NIDCD	94791	#N/A
NCI	8915102	42216	PA-11-197	5K99CA181488-02	5	K99	CA	181488	2		SCHMIDT, MICHAEL K	41871	42582	Transition to Independence Study Section (I)[NCI-I]	11706324	7	Unavailable	76580745	DPMGH9MG1X67	76580745	DPMGH9MG1X67	US	42.337593	-71.108279	1464901	DANA FARBER CANCER INST		Elite	female	98	BOSTON	MA	Independent Hospitals	22155450	UNITED STATES	N	42217	42582	398	Other Research-Related	2015	176720	NCI	176720	coastal
NIDCR	8893047	42222	PA-11-197	5K99DE024571-02	5	K99	DE	24571	2		FRIEDEN, LESLIE A	41883	43343	NIDCR Special Grants Review Committee[DSR]	11494812	98	NONE	948108063	KWTAB1GYM4L9	948108063	KWTAB1GYM4L9	US	18.410481	-66.065613	578705	U OF PUERTO RICO MED SCI		Non_Elite	female	98	SAN JUAN	PR	SCHOOLS OF DENTISTRY/ORAL HYGN	9365067	UNITED STATES	N	42248	43343	121	Other Research-Related	2015	126994	NIDCR	126994	coastal
NHLBI	8898910	42222	PA-11-197	5K99HL122515-02	5	K99	HL	122515	2		HUANG, LI-SHIN	41883	42613	ZHL1-CSR-P(M1)	10346384	7	Unavailable	623544785	H5G9NWEFHXN4	623544785	H5G9NWEFHXN4	US	42.363082	-71.087893	10021177	BROAD INST INC		Elite	female	53	CAMBRIDGE	MA	Research Institutes	21421027	UNITED STATES	N	42248	42613	837	Other Research-Related	2015	131975	NHLBI	131975	coastal
NIEHS	8928181	42223	PA-11-197	5K99ES024570-02	5	K99	ES	24570	2		TYSON, FREDERICK L	41898	42613	ZES1-LKB-J(KS)	6985529	5	PUBLIC HEALTH & PREV MEDICINE	66469933	S352L5PJLMP8	66469933	S352L5PJLMP8	US	33.791247	-84.3249	2384501	EMORY U		Non_Elite	female	93	ATLANTA	GA	SCHOOLS OF PUBLIC HEALTH	303221007	UNITED STATES	N	42248	42613	113	Other Research-Related	2015	87677	NIEHS	87677	coastal
NIDDK	8893076	42223	PA-11-197	5K99DK101605-02	5	K99	DK	101605	2		HYDE, JAMES F	41852	42582	Diabetes, Endocrinology and Metabolic Diseases B Study Section[DDK-B]	10414706	7	GENETICS	47006379	JDLVAVGYJQ21	47006379	JDLVAVGYJQ21	US	42.335672	-71.104237	3212902	HARVARD MED SCH		Elite	female	95	BOSTON	MA	SCHOOLS OF MEDICINE	21201616	UNITED STATES	N	42217	42582	847	Other Research-Related	2015	79824	NIDDK	79824	coastal
NIDDK	8893075	42223	PA-11-197	5K99DK100640-02	5	K99	DK	100640	2		LAUGHLIN, MAREN R	41852	42613	Diabetes, Endocrinology and Metabolic Diseases B Study Section[DDK-B]	10518006	3	NEUROSCIENCES	96997515	NPSNT86JKN51	96997515	NPSNT86JKN51	US	45.49882	-122.685647	6297007	OREGON HEALTH & SCI U		Non_Elite	female	99	PORTLAND	OR	OVERALL MEDICAL	972393098	UNITED STATES	N	42217	42613	847	Other Research-Related	2015	90000	NIDDK	90000	#N/A
NIGMS	8914646	42226	PA-11-197	5K99GM111430-02	5	K99	GM	111430	2		FLICKER, PAULA F	41883	42582	ZGM1-TWD-Y(KR)	10854177	3	BIOCHEMISTRY	43207562	FL6GV84CKN57	43207562	FL6GV84CKN57	US	41.310925	-72.926428	9420201	YALE U		Elite	female	98	NEW HAVEN	CT	SCHOOLS OF MEDICINE	65208327	UNITED STATES	N	42217	42582	859	Other Research-Related	2015	87894	NIGMS	87894	coastal
NINDS	8880301	42227	PA-11-197	5K99NS088193-02	5	K99	NS	88193	2		CHEN, DAOFEN	41852	42582	NST-2 Study Section [NST-2]	8229649	13	BIOCHEMISTRY	621889815	QHF5ZZ114M72	621889815	QHF5ZZ114M72	US	40.8415	-73.9414	1833205	COLUMBIA U HEALTH SCI		Elite	female	59	NEW YORK	NY	SCHOOLS OF MEDICINE	100323725	UNITED STATES	N	42217	42582	853	Other Research-Related	2015	90000	NINDS	90000	coastal
NINDS	8929321	42227	PA-14-042	5K99NS089824-02	5	K99	NS	89824	2		MAMOUNAS, LAURA	41912	42613	NST-2 Study Section [NST-2]	14925639	9	GENETICS	51113330	FXKMA43NTV21	51113330	FXKMA43NTV21	US	29.70926	-95.400851	481201	BAYLOR COLL OF MED		Non_Elite	female	52	HOUSTON	TX	SCHOOLS OF MEDICINE	770303411	UNITED STATES	N	42248	42613	853	Other Research-Related	2015	92578	NINDS	92578	coastal
NICHD	8920665	42228	PA-11-197	5K99HD078483-02	5	K99	HD	78483	2		FREUND, LISA S	41885	42735	Biobehavioral and Behavioral Sciences Study Section[CHHD-H]	11694866	52	PSYCHOLOGY	804355790	UYTTZT6G9DT1	804355790	UYTTZT6G9DT1	US	32.876991	-117.24087	577507	U OF CALIFORNIA SAN DIEGO		Elite	female	99	LA JOLLA	CA	SCHOOLS OF ARTS AND SCIENCES	920930621	UNITED STATES	N	42248	42735	865	Other Research-Related	2015	95571	NICHD	95571	coastal
NINR	8921278	42233	PA-11-197	5K99NR015106-02	5	K99	NR	15106	2		YOON, SUNG SUG	41887	42613	Nursing Science Review Committee[NRRC(59)]	9811572	18	PEDIATRICS	4514360	MKAGLD59JRL1	4514360	MKAGLD59JRL1	US	40.440909	-79.959125	2059802	U OF PITTSBURGH AT PITTSBURGH		Elite	female	97	PITTSBURGH	PA	SCHOOLS OF MEDICINE	152133320	UNITED STATES	N	42248	42613	361	Other Research-Related	2015	86522	NINR	86522	coastal
NIEHS	8922002	42233	PA-11-197	5K99ES023848-02	5	K99	ES	23848	2		CHADWICK, LISA	41887	42613	ZES1-LWJ-D(K)	6997106	2	PHARMACOLOGY	161202122	LCLSJAGTNZQ7	161202122	LCLSJAGTNZQ7	US	43.068519	-89.400858	578503	U OF WISCONSIN MADISON		Elite	female	98	MADISON	WI	SCHOOLS OF PHARMACY	537151218	UNITED STATES	N	42248	42613	113	Other Research-Related	2015	99101	NIEHS	99101	#N/A
NHGRI	8919437	42235	PA-14-042	5K99HG008175-02	5	K99	HG	8175	2		KAUFMAN, DAVE J	41883	42330	Societal and Ethical Issues in Research Study Section[SEIR]	11401707	52	INTERNAL MEDICINE/MEDICINE	804355790	UYTTZT6G9DT1	804355790	UYTTZT6G9DT1	US	32.876991	-117.24087	577507	U OF CALIFORNIA SAN DIEGO		Elite	female	64	LA JOLLA	CA	SCHOOLS OF MEDICINE	920930621	UNITED STATES	N	42248	42330	172	Other Research-Related	2015	10452	NHGRI	10452	coastal
NCI	8904636	42236	PA-11-197	5K99CA184122-02	5	K99	CA	184122	2		SCHMIDT, MICHAEL K	41883	43069	Transition to Independence Study Section (I)[NCI-I]	11812915	12	Unavailable	64931884	KUKXRCZ6NZC2	64931884	KUKXRCZ6NZC2	US	40.764045	-73.956024	5079202	SLOAN KETTERING INST CAN RES		Non_Elite	female	99	NEW YORK	NY	Research Institutes	100656007	UNITED STATES	N	42248	43069	398	Other Research-Related	2015	141750	NCI	141750	coastal
NCI	8930113	42236	PA-14-042	5K99CA190605-02	5	K99	CA	190605	2		SCHMIDT, MICHAEL K	41901	42551	Transition to Independence Study Section (I)[NCI-I]	9323532	7	Unavailable	78200995	HMSNCM57QNR5	78200995	HMSNCM57QNR5	US	47.627342	-122.331593	861001	FRED HUTCHINSON CANCER RES CTR		Elite	female	97	SEATTLE	WA	Research Institutes	981094433	UNITED STATES	N	42248	42551	398	Other Research-Related	2015	80618	NCI	80618	coastal
NCI	8868585	42237	PA-14-042	1K99CA194198-01	1	K99	CA	194198	1		SCHMIDT, MICHAEL K	42248	42582	Transition to Independence Study Section (I)[NCI-I]	9365636	18	RADIATION-DIAGNOSTIC/ONCOLOGY	9214214	HJD6G4D6TJY5	9214214	HJD6G4D6TJY5	US	37.426852	-122.17047	8046501	STANFORD U		Elite	female	96	STANFORD	CA	SCHOOLS OF MEDICINE	943052004	UNITED STATES	N	42248	42582	398	Other Research-Related	2015	123603	NCI	123603	#N/A
NIGMS	8919929	42237	PA-11-197	5K99GM111825-02	5	K99	GM	111825	2		SESMA, MICHAEL A	41883	42978	ZGM1-TWD-Y(KR)	10497976	3	GENETICS	42250712	GM1XX56LEP58	42250712	GM1XX56LEP58	US	39.953462	-75.193983	6463801	U OF PENNSYLVANIA		Elite	female	98	PHILADELPHIA	PA	SCHOOLS OF MEDICINE	191046205	UNITED STATES	N	42248	42978	859	Other Research-Related	2015	73246	NIGMS	73246	coastal
NIDDK	8901152	42240	PA-11-197	5K99DK098294-02	5	K99	DK	98294	2		HYDE, JAMES F	41883	42551	Diabetes, Endocrinology and Metabolic Diseases B Study Section[DDK-B]	11350722	13	INTERNAL MEDICINE/MEDICINE	621889815	QHF5ZZ114M72	621889815	QHF5ZZ114M72	US	40.8415	-73.9414	1833205	COLUMBIA U HEALTH SCI		Elite	female	88	NEW YORK	NY	SCHOOLS OF MEDICINE	100323725	UNITED STATES	N	42248	42551	847	Other Research-Related	2015	90000	NIDDK	90000	coastal
NIEHS	8968016	42242	PA-14-042	1K99ES024808-01A1	1	K99	ES	24808	1	A	JOUBERT, BONNIE	42248	42674	ZES1-LWJ-D(KC)	12073336	13	PUBLIC HEALTH & PREV MEDICINE	124726725	GS3YEVSS12N6	124726725	GS3YEVSS12N6	US	37.870017	-122.268624	577502	U OF CALIFORNIA BERKELEY		Elite	female	98	BERKELEY	CA	SCHOOLS OF PUBLIC HEALTH	947101749	UNITED STATES	N	42248	42674	113	Other Research-Related	2015	70918	NIEHS	70918	coastal
NEI	8927649	42243	PA-11-197	5K99EY024653-02	5	K99	EY	24653	2		AGARWAL, NEERAJ	41912	42978	ZEY1-VSN(02)	11036673	10	BIOLOGY	49179401	F4N1QNPB95M4	49179401	F4N1QNPB95M4	US	40.81207	-73.954377	1833202	COLUMBIA U NEW YORK MORNINGSIDE		Elite	female	78	NEW YORK	NY	GRADUATE SCHOOLS	100276900	UNITED STATES	N	42248	42978	867	Other Research-Related	2015	119880	NEI	119880	coastal
NCI	8926918	42244	RFA-OD-13-016	5K99CA187460-02	5	K99	CA	187460	2		KORCZAK, JEANNETTE F	41894	42613	Special Emphasis Panel[ZRG1-BST-N(50)R]	11491230	12	INTERNAL MEDICINE/MEDICINE	94878337	KMH5K9V7S518	94878337	KMH5K9V7S518	US	37.767442	-122.413937	577508	U OF CALIFORNIA SAN FRANCISCO		Elite	female	98	SAN FRANCISCO	CA	SCHOOLS OF MEDICINE	941432510	UNITED STATES	N	42248	42613	77	Other Research-Related	2015	104919	OD	104919	coastal
NIDDK	8928611	42247	PA-14-042	5K99DK104066-02	5	K99	DK	104066	2		ROY, CINDY	41899	42613	Kidney, Urologic and Hematologic Diseases D Study Section[DDK-D]	10772025	3	ANATOMY/CELL BIOLOGY	96997515	NPSNT86JKN51	96997515	NPSNT86JKN51	US	45.49882	-122.685647	6297007	OREGON HEALTH & SCI U		Non_Elite	female	89	PORTLAND	OR	SCHOOLS OF MEDICINE	972393098	UNITED STATES	N	42248	42613	847	Other Research-Related	2015	90000	NIDDK	90000	#N/A
NIDDK	8913958	42250	PA-11-197	5K99DK100465-02	5	K99	DK	100465	2		LEE, CHRISTINE G	41883	42613	Diabetes, Endocrinology and Metabolic Diseases B Study Section[DDK-B]	10936112	6	INTERNAL MEDICINE/MEDICINE	41096314	MW8JHK6ZYEX8	41096314	MW8JHK6ZYEX8	US	39.745098	-104.837605	1199905	U OF COLORADO DENVER	2871	Non_Elite	female	97	Aurora	CO	SCHOOLS OF MEDICINE	800452570	UNITED STATES	N	42248	42613	847	Other Research-Related	2015	87692	NIDDK	87692	#N/A
NIGMS	8921236	42251	PA-11-197	5K99GM111978-02	5	K99	GM	111978	2		BARSKI, OLEG	41887	42369	ZGM1-TWD-Y(KR)	11637119	12	CHEMISTRY	3403953	NPM2J7MSCF61	3403953	NPM2J7MSCF61	US	40.870717	-77.83415	1524202	PENNSYLVANIA STATE		Non_Elite	female	97	UNIVERSITY PARK	PA	SCHOOLS OF ARTS AND SCIENCES	168027000	UNITED STATES	N	42248	42369	859	Other Research-Related	2015	26866	NIGMS	26866	coastal
NIAAA	9119940	42275	PA-11-197	7K99AA022651-03	7	K99	AA	22651	3		CUI, CHANGHAI	41791	42521	Neuroscience and Behavior Study Section[AA-4]	8156103	2	ANATOMY/CELL BIOLOGY	782627814	M7KCJ79FAVH5	782627814	M7KCJ79FAVH5	US	29.957378	-90.082793	577902	LSU HEALTH SCI CTR		Non_Elite	female	98	NEW ORLEANS	LA	SCHOOLS OF MEDICINE	701127021	UNITED STATES	N	42275	42521	273	Other Research-Related	2015	101845	NIAAA	101845	#N/A
NHLBI	8968857	42318	PA-14-042	5K99HL122507-02	5	K99	HL	122507	2		HUANG, LI-SHIN	41958	42460	ZHL1-CSR-P(O1)	9373486	5	INTERNAL MEDICINE/MEDICINE	965717143	GTNBNWXJ12D5	965717143	DWH7MSXKA2A8; GTNBNWXJ12D5	US	36.143381	-86.803365	8721001	VANDERBILT U	1038	Non_Elite	female	98	Nashville	TN	SCHOOLS OF MEDICINE	372032408	UNITED STATES	N	42309	42460	837	Other Research-Related	2016	124929	NHLBI	124929	coastal
NIDCR	8995653	42332	PA-14-042	5K99DE024969-02	5	K99	DE	24969	2		FRIEDEN, LESLIE A	42019	42782	NIDCR Special Grants Review Committee[DSR]	10755933	12	PATHOLOGY	60217502	YNT8TCJH8FQ8	60217502	YNT8TCJH8FQ8	US	40.7607	-73.9603	1514803	WEILL MED COLL OF CORNELL U		Elite	female	98	NEW YORK	NY	SCHOOLS OF MEDICINE	100654805	UNITED STATES	N	42370	42782	121	Other Research-Related	2016	123050	NIDCR	123050	coastal
NHLBI	8975238	42333	PA-14-042	5K99HL125805-02	5	K99	HL	125805	2		MARIC-BILKAN, CHRISTINE	41974	42613	ZHL1-CSR-P(O1)	9807336	3	PHYSIOLOGY	969663814	NNFQH1JAPEP3	969663814	NNFQH1JAPEP3	US	29.643443	-82.349637	513806	U OF FLORIDA		Non_Elite	female	75	GAINESVILLE	FL	SCHOOLS OF MEDICINE	326115500	UNITED STATES	N	42339	42613	837	Other Research-Related	2016	112253	NHLBI	112253	coastal
NHLBI	8974440	42333	PA-14-042	5K99HL125667-02	5	K99	HL	125667	2		CHARETTE, MARC F	41974	42704	ZHL1-CSR-P(O1)	10890815	12	INTERNAL MEDICINE/MEDICINE	121911077	M5SZJ6VHUHN8	121911077	M5SZJ6VHUHN8	US	40.669895	-73.974354	5998304	NEW YORK U SCH OF MED		Elite	female	80	NEW YORK	NY	SCHOOLS OF MEDICINE	10016	UNITED STATES	N	42339	42704	837	Other Research-Related	2016	110721	NHLBI	110721	coastal
NIA	8990511	42340	PA-14-042	5K99AG049126-02	5	K99	AG	49126	2		GUO, MAX	42005	42947	Biological Aging Study Section[NIA-B]	10392575	18	Unavailable	148230662	MGUCX773RNJ8	148230662	MGUCX773RNJ8	US	26.885174	-80.11392	10005569	SCRIPPS FLORIDA		Non_Elite	female	98	JUPITER	FL	Research Institutes	334585284	UNITED STATES	N	42370	42947	866	Other Research-Related	2016	101250	NIA	101250	coastal
NIMH	9025583	42347	PA-14-042	5K99MH104154-02	5	K99	MH	104154	2		ALLISON, SUSANNAH	42064	42794	ZMH1-ERB-K(07)	10588894	4	NONE	608195277	D3LHU66KBLD5	608195277	D3LHU66KBLD5	US	35.9316	-79.057377	578206	U OF NORTH CAROLINA CHAPEL HILL		Elite	female	97	CHAPEL HILL	NC	SCHOOLS OF PUBLIC HEALTH	275995023	UNITED STATES	N	42370	42794	242	Other Research-Related	2016	83991	NIMH	83991	#N/A
NEI	8976161	42363	PA-14-042	5K99EY025026-02	5	K99	EY	25026	2		AGARWAL, NEERAJ	41975	42978	ZEY1-VSN(03)	11331514	49	Unavailable	78731668	NNJ6BMBTFGN5	78731668	NNJ6BMBTFGN5	US	32.8863	-117.243929	7210001	SALK INST FOR BIOLOGICAL STUDIES		Non_Elite	female	98	La Jolla	CA	Research Institutes	920371002	UNITED STATES	N	42339	42978	867	Other Research-Related	2016	94392	NEI	94392	coastal
NIA	9008012	42396	PA-14-042	5K99AG049056-02	5	K99	AG	49056	2		MILLER, MARILYN	42050	42766	Basic Neuroscience of Aging Study Section[NIA-N]	12085130	8	Unavailable	73130411	FLJ7DQKLL226	73130411	FLJ7DQKLL226	US	42.363198	-71.068772	4907701	MASSACHUSETTS GENERAL HOSP		Elite	female	97	BOSTON	MA	Independent Hospitals	21142621	UNITED STATES	N	42401	42766	866	Other Research-Related	2016	137160	NIA	137160	coastal
NCCIH	8997065	42398	PA-14-042	5K99AT008576-02	5	K99	AT	8576	2		HOPP, CRAIG	42036	42531	ZAT1-SM(33)	11380845	3	INTERNAL MEDICINE/MEDICINE	832127323	DLWBSLWAJWR1	832127323	DLWBSLWAJWR1	US	39.999598	-83.033131	6218701	OHIO STATE U		Non_Elite	female	98	COLUMBUS	OH	SCHOOLS OF MEDICINE	432101016	UNITED STATES	N	42401	42531	213	Other Research-Related	2016	34775	NCCIH	9775	coastal
NIGMS	9021676	42409	PA-14-042	5K99GM112982-02	5	K99	GM	112982	2		FLICKER, PAULA F	42064	42735	ZGM1-TWD-Y(KR)	11182371	12	PHARMACOLOGY	94878337	KMH5K9V7S518	94878337	KMH5K9V7S518	US	37.767442	-122.413937	577508	U OF CALIFORNIA SAN FRANCISCO		Elite	female	60	SAN FRANCISCO	CA	SCHOOLS OF MEDICINE	941432510	UNITED STATES	N	42430	42735	859	Other Research-Related	2016	90000	NIGMS	90000	#N/A
NIA	9050617	42411	PA-14-042	5K99AG049934-02	5	K99	AG	49934	2		GUO, MAX	42109	42930	Biological Aging Study Section[NIA-B]	11789634	18	GENETICS	9214214	HJD6G4D6TJY5	9214214	HJD6G4D6TJY5	US	37.426852	-122.17047	8046501	STANFORD U		Elite	female	98	STANFORD	CA	SCHOOLS OF MEDICINE	943052004	UNITED STATES	N	42461	42930	866	Other Research-Related	2016	95377	NIA	95377	coastal
NIEHS	8994283	42418	PA-14-042	5K99ES024783-02	5	K99	ES	24783	2		NADADUR, SRIKANTH	42036	42766	ZES1-LWJ-J(K9)1	9836779	1	PHYSIOLOGY	191510239	M7PNRH24BBM8	191510239	M7PNRH24BBM8	US	39.618877	-79.973319	9163701	WEST VIRGINIA U		Non_Elite	female	99	MORGANTOWN	WV	SCHOOLS OF MEDICINE	265066845	UNITED STATES	N	42401	42766	113	Other Research-Related	2016	86157	NIEHS	86157	coastal
NIDCR	9016520	42419	PA-14-042	5K99DE023826-02	5	K99	DE	23826	2		FRIEDEN, LESLIE A	42055	42794	NIDCR Special Grants Review Committee[DSR]	10687948	7	DENTISTRY	63690705	YND4PLMC9AN7	63690705	YND4PLMC9AN7	US	33.50591	-86.799772	1288803	U OF ALABAMA AT BIRMINGHAM	2329	Non_Elite	female	100	BIRMINGHAM	AL	SCHOOLS OF DENTISTRY/ORAL HYGN	352940001	UNITED STATES	N	42401	42794	121	Other Research-Related	2016	123378	NIDCR	123378	coastal
NICHD	9013489	42423	PA-14-042	5K99HD082340-02	5	K99	HD	82340	2		WHITE, DELLA	42047	42766	Population Sciences Study Section[CHHD-W]	11817394	7	Unavailable	76593722	Z1L9F1MM1RY3	76593722	Z1L9F1MM1RY3	US	42.337481	-71.104964	1504801	BOSTON CHILDRENS HOSP		Elite	female	91	BOSTON	MA	Independent Hospitals	21155724	UNITED STATES	N	42401	42766	865	Other Research-Related	2016	119074	NICHD	119074	coastal
NIDCR	9011520	42424	PA-14-042	5K99DE025060-02	5	K99	DE	25060	2		FRIEDEN, LESLIE A	42095	42766	NIDCR Special Grants Review Committee[DSR]	10639905	18	DENTISTRY	4514360	MKAGLD59JRL1	4514360	MKAGLD59JRL1	US	40.440909	-79.959125	2059802	U OF PITTSBURGH AT PITTSBURGH		Elite	female	99	PITTSBURGH	PA	SCHOOLS OF DENTISTRY/ORAL HYGN	152133320	UNITED STATES	N	42461	42766	121	Other Research-Related	2016	93927	NIDCR	93927	coastal
NIDA	9021634	42425	PA-14-042	5K99DA038725-02	5	K99	DA	38725	2		LIN, YU	42064	42855	ZDA1-HXO-H(02)S	11232592	1	ANESTHESIOLOGY	68552207	L6NFUM28LQM5	68552207	L6NFUM28LQM5	US	38.664368	-90.323797	9083901	WASHINGTON U	1373	Non_Elite	female	74	SAINT LOUIS	MO	SCHOOLS OF MEDICINE	631304862	UNITED STATES	N	42430	42855	279	Other Research-Related	2016	140122	NIDA	140122	#N/A
NICHD	9034640	42443	PA-14-042	5K99HD083512-02	5	K99	HD	83512	2		RAJU, TONSE N	42095	42825	Pediatrics Study Section[CHHD-A]	12182910	8	Unavailable	73130411	FLJ7DQKLL226	73130411	FLJ7DQKLL226	US	42.363198	-71.068772	4907701	MASSACHUSETTS GENERAL HOSP		Elite	female	86	BOSTON	MA	Independent Hospitals	21142621	UNITED STATES	N	42461	42825	865	Other Research-Related	2016	137000	NICHD	137000	coastal
NCI	9045593	42445	PA-14-042	5K99CA194309-02	5	K99	CA	194309	2		RADAEV, SERGEY	42097	42704	Transition to Independence Study Section (I)[NCI-I]	11498863	3	Unavailable	75524595	DW1XZMGNFBL4	75524595	DW1XZMGNFBL4	US	39.951288	-75.195771	9340401	WISTAR INST		Non_Elite	female	99	PHILADELPHIA	PA	Research Institutes	191044265	UNITED STATES	N	42461	42704	398	Other Research-Related	2016	115014	NCI	115014	coastal
NIEHS	9056593	42446	PA-14-042	5K99ES024116-02	5	K99	ES	24116	2		GRAY, KIMBERLY A	42114	42825	ZES1-LWJ-K(K9)	10118913	13	PEDIATRICS	78861598	C8H9CNG1VBD9	78861598	C8H9CNG1VBD9	US	40.790284	-73.946781	3839801	ICAHN SCH OF MED AT MOUNT SINAI		Non_Elite	female	88	NEW YORK	NY	SCHOOLS OF MEDICINE	100296574	UNITED STATES	N	42461	42825	113	Other Research-Related	2016	118627	NIEHS	118627	#N/A
NIMH	9088176	42446	PA-15-083	1K99MH109652-01	1	K99	MH	109652	1		DESMOND, NANCY L	42447	42794	ZMH1-ERB-S(01)	14072776	18	BIOMEDICAL ENGINEERING	9214214	HJD6G4D6TJY5	9214214	HJD6G4D6TJY5	US	37.426852	-122.17047	8046501	STANFORD U		Elite	female	96	STANFORD	CA	SCHOOLS OF MEDICINE	943052004	UNITED STATES	N	42447	42794	242	Other Research-Related	2016	111543	NIMH	111543	coastal
NIDA	9037636	42452	PA-14-042	5K99DA038069-02	5	K99	DA	38069	2		LIN, YU	42095	42674	ZDA1-HXO-H(04)S	8429397	3	NEUROSCIENCES	96997515	NPSNT86JKN51	96997515	NPSNT86JKN51	US	45.49882	-122.685647	6297007	OREGON HEALTH & SCI U		Non_Elite	female	98	PORTLAND	OR	OVERALL MEDICAL	972393098	UNITED STATES	N	42461	42674	279	Other Research-Related	2016	89515	NIDA	89515	#N/A
NICHD	9032786	42454	PA-15-083	1K99HD083523-01A1	1	K99	HD	83523	1	A	LEE, KAREN	42461	42462	Health, Behavior, and Context Study Section[CHHD-M]	10673804	7	OTHER HEALTH PROFESSIONS	1910777	FTMTDMBR29C7	1910777	FTMTDMBR29C7	US	39.325256	-76.605131	4134401	JOHNS HOPKINS U		Elite	female	99	BALTIMORE	MD	SCHOOLS OF NURSING	212182680	UNITED STATES	N	42461	42462	865	Other Research-Related	2016	1	NICHD	1	coastal
NIDDK	9021645	42454	PA-14-042	5K99DK101585-02	5	K99	DK	101585	2		RANKIN, TRACY L	42095	42855	Kidney, Urologic and Hematologic Diseases D Study Section[DDK-D]	10856162	3	PHARMACOLOGY	43207562	FL6GV84CKN57	43207562	FL6GV84CKN57	US	41.310925	-72.926428	9420201	YALE U		Elite	female	97	NEW HAVEN	CT	SCHOOLS OF MEDICINE	65208327	UNITED STATES	N	42461	42855	847	Other Research-Related	2016	90000	NIDDK	90000	#N/A
NINDS	9014571	42457	PA-14-042	5K99NS091538-02	5	K99	NS	91538	2		GUBITZ, AMELIE	42095	42825	NST-2 Study Section [NST-2]	11168714	52	Unavailable	627922248	ESJQL5U9JYM3	627922248	ESJQL5U9JYM3	US	32.875761	-117.239541	2384603	LUDWIG INST FOR CANCER RES LTD		Non_Elite	female	94	LA JOLLA	CA	Research Institutes	920930660	UNITED STATES	N	42461	42825	853	Other Research-Related	2016	93042	NINDS	93042	coastal
NICHD	9043156	42459	PA-14-042	5K99HD083521-02	5	K99	HD	83521	2		MOSS, STUART B	42095	42922	Reproduction, Andrology, and Gynecology Study Section[CHHD-R]	10587677	2	Unavailable	42140483	XR6LMXNKDJJ1	42140483	XR6LMXNKDJJ1	US	44.365361	-68.196303	7096501	JACKSON lab		Non_Elite	female	99	BAR HARBOR	ME	Research Institutes	46091523	UNITED STATES	N	42461	42922	865	Other Research-Related	2016	131490	NICHD	131490	coastal
NIMH	9041686	42461	PA-14-042	5K99MH106757-02	5	K99	MH	106757	2		DESMOND, NANCY L	42095	42825	ZMH1-ERB-S(01)	10926517	1	PHARMACOLOGY	1785542	E3FDXZ6TBHW3	1785542	E3FDXZ6TBHW3	US	41.826136	-71.404513	1003201	BROWN U		Elite	female	98	PROVIDENCE	RI	SCHOOLS OF MEDICINE	29034202	UNITED STATES	N	42461	42825	242	Other Research-Related	2016	93588	NIMH	93588	coastal
NCI	9059673	42468	PA-14-042	5K99CA188259-02	5	K99	CA	188259	2		SCHMIDT, MICHAEL K	42125	42643	Transition to Independence Study Section (I)[NCI-I]	10431069	49	Unavailable	78731668	NNJ6BMBTFGN5	78731668	NNJ6BMBTFGN5	US	32.8863	-117.243929	7210001	SALK INST FOR BIOLOGICAL STUDIES		Non_Elite	female	94	La Jolla	CA	Research Institutes	920371002	UNITED STATES	N	42491	42643	398	Other Research-Related	2016	97557	NCI	97557	coastal
NIMH	9067503	42479	PA-14-042	5K99MH103401-02	5	K99	MH	103401	2		DESMOND, NANCY L	42139	42621	ZMH1-ERB-S(01)	9421435	3	NEUROLOGY	47120084	TX2DAGQPENZ5	47120084	TX2DAGQPENZ5	US	38.543366	-121.72946	577503	U OF CALIFORNIA AT DAVIS		Non_Elite	female	98	DAVIS	CA	SCHOOLS OF MEDICINE	956186153	UNITED STATES	N	42491	42621	242	Other Research-Related	2016	31975	NIMH	31975	coastal
NEI	9068138	42485	PA-14-042	5K99EY024992-02	5	K99	EY	24992	2		AGARWAL, NEERAJ	42156	42886	ZEY1-VSN(03)	11740238	11	PHARMACOLOGY	77758407	HJMKEF7EJW69	77758407	HJMKEF7EJW69	US	41.502739	-81.607334	218601	CASE WESTERN RESERVE U		Non_Elite	female	90	CLEVELAND	OH	SCHOOLS OF MEDICINE	441061712	UNITED STATES	N	42522	42886	867	Other Research-Related	2016	97478	NEI	97478	coastal
NHLBI	9109726	42486	PA-15-083	1K99HL129192-01A1	1	K99	HL	129192	1	A	CHARETTE, MARC F	42491	42855	NHLBI Mentored Transition to Independence Study Section[MTI(JA)]	12086567	3	PHYSIOLOGY	928824473	X59NJBFL8BJ3	928824473	X59NJBFL8BJ3	US	32.328724	-90.175537	5390304	U OF MISSISSIPPI MED CTR		Non_Elite	female	79	JACKSON	MS	SCHOOLS OF MEDICINE	392164500	UNITED STATES	N	42491	42855	837	Other Research-Related	2016	124957	NHLBI	124957	coastal
NIA	9137631	42490	PA-14-042	5K99AG050764-02	5	K99	AG	50764	2		YANG, AUSTIN JYAN-YU	42262	43220	Basic Neuroscience of Aging Study Section[NIA-N]	12416078	49	Unavailable	781613492	PHZJFZ32NKH4	781613492	PHZJFZ32NKH4	US	32.903062	-117.243592	7375802	SCRIPPS RES INST THE		Non_Elite	female	98	LA JOLLA	CA	Other Domestic Non-Profits	920371000	UNITED STATES	N	42491	43220	866	Other Research-Related	2016	89975	NIA	89975	coastal
NIA	9061557	42490	PA-14-042	5K99AG047336-02	5	K99	AG	47336	2		YANG, AUSTIN JYAN-YU	42125	42855	Basic Neuroscience of Aging Study Section[NIA-N]	10555788	8	Unavailable	73130411	FLJ7DQKLL226	73130411	FLJ7DQKLL226	US	42.363198	-71.068772	4907701	MASSACHUSETTS GENERAL HOSP		Elite	female	98	BOSTON	MA	Independent Hospitals	21142621	UNITED STATES	N	42491	42855	866	Other Research-Related	2016	136306	NIA	136306	coastal
NIDCR	9095306	42492	PA-14-042	5K99DE025088-02	5	K99	DE	25088	2		FRIEDEN, LESLIE A	42186	43069	NIDCR Special Grants Review Committee[DSR]	9574643	18	DENTISTRY	4514360	MKAGLD59JRL1	4514360	MKAGLD59JRL1	US	40.440909	-79.959125	2059802	U OF PITTSBURGH AT PITTSBURGH		Elite	female	98	PITTSBURGH	PA	SCHOOLS OF DENTISTRY/ORAL HYGN	152133320	UNITED STATES	N	42522	43069	121	Other Research-Related	2016	101195	NIDCR	101195	coastal
NCI	9087433	42493	PA-15-083	1K99CA204592-01	1	K99	CA	204592	1		RADAEV, SERGEY	42499	42735	Transition to Independence Study Section (I)[NCI-I]	10169713	7	INTERNAL MEDICINE/MEDICINE	1910777	FTMTDMBR29C7	1910777	FTMTDMBR29C7	US	39.325256	-76.605131	4134401	JOHNS HOPKINS U		Elite	female	99	BALTIMORE	MD	SCHOOLS OF MEDICINE	212182680	UNITED STATES	N	42499	42735	398	Other Research-Related	2016	94151	NCI	94151	coastal
NHLBI	9069043	42493	PA-14-042	5K99HL124279-02	5	K99	HL	124279	2		HUANG, LI-SHIN	42142	42597	NHLBI Mentored Transition to Independence Study Section[MTI(JA)]	10205250	1	NONE	5421136	ZUE9HKT2CLC9	5421136	ZUE9HKT2CLC9	US	41.789554	-87.601172	1413601	U OF CHICAGO		Elite	female	69	CHICAGO	IL	ORGANIZED RESEARCH UNITS	606372612	UNITED STATES	N	42491	42597	837	Other Research-Related	2016	89964	NHLBI	89964	coastal
NIGMS	9061749	42496	PA-14-042	5K99GM114436-02	5	K99	GM	114436	2		SESMA, MICHAEL A	42125	42561	ZGM1-TWD-A(KR)	10946674	7	Unavailable	78200995	HMSNCM57QNR5	78200995	HMSNCM57QNR5	US	47.627342	-122.331593	861001	FRED HUTCHINSON CANCER RES CTR		Elite	female	98	SEATTLE	WA	Research Institutes	981094433	UNITED STATES	N	42491	42561	859	Other Research-Related	2016	22419	NIGMS	22419	#N/A
NIAID	9086229	42503	PA-14-042	5K99AI120845-02	5	K99	AI	120845	2		KUO, LILLIAN S	42170	42886	Acquired Immunodeficiency Syndrome Research Study Section[AIDS]	11281745	3	BIOCHEMISTRY	43207562	FL6GV84CKN57	43207562	FL6GV84CKN57	US	41.310925	-72.926428	9420201	YALE U		Elite	female	67	NEW HAVEN	CT	SCHOOLS OF ARTS AND SCIENCES	65208327	UNITED STATES	N	42522	42886	855	Other Research-Related	2016	104695	NIAID	104695	#N/A
NICHD	9109751	42521	PA-15-083	1K99HD085188-01A1	1	K99	HD	85188	1	A	FREUND, LISA S	42552	42916	Biobehavioral and Behavioral Sciences Study Section[CHHD-H]	11089517	5	MICROBIOLOGY/IMMUN/VIROLOGY	82359691	LN53LCFJFL45	82359691	LN53LCFJFL45	US	42.369697	-71.11193	3212901	HARVARD U	1627	Elite	female	98	CAMBRIDGE	MA	SCHOOLS OF ARTS AND SCIENCES	21385369	UNITED STATES	N	42552	42916	865	Other Research-Related	2016	127845	NICHD	127845	#N/A
NIAID	9014078	42521	PA-15-083	1K99AI121473-01	1	K99	AI	121473	1		GONDRE-LEWIS, TIMOTHY A	42522	42613	Microbiology and Infectious Diseases Advisory Committee[MID]	11263437	12	MICROBIOLOGY/IMMUN/VIROLOGY	71037113	LHGDNJMZ64Y1	71037113	LHGDNJMZ64Y1	US	40.763746	-73.955386	7056601	ROCKEFELLER U		Non_Elite	female	96	NEW YORK	NY	GRADUATE SCHOOLS	100656399	UNITED STATES	N	42522	42613	855	Other Research-Related	2016	58564	NIAID	58564	coastal
NIDCR	9099823	42523	PA-14-042	5K99DE024758-02	5	K99	DE	24758	2		FRIEDEN, LESLIE A	42186	42825	ZDE1-VH(16)	11700950	6	PUBLIC HEALTH & PREV MEDICINE	41096314	MW8JHK6ZYEX8	41096314	MW8JHK6ZYEX8	US	39.745098	-104.837605	1199905	U OF COLORADO DENVER		Non_Elite	female	95	Aurora	CO	SCHOOLS OF PUBLIC HEALTH	800452570	UNITED STATES	N	42552	42825	121	Other Research-Related	2016	100034	NIDCR	100034	coastal
NIAAA	9069670	42527	PA-11-197	5K99AA023266-02	5	K99	AA	23266	2		WANG, JOE	42156	42886	ZAA1-DD(02)M	10534747	11	OTHER BASIC SCIENCES	135781701	M5QFLTCTSQN6	135781701	M5QFLTCTSQN6	US	41.502657	-81.622127	10000858	CLEVELAND CLINIC LERNER COM CWRU		Non_Elite	female	97	CLEVELAND	OH	SCHOOLS OF MEDICINE	441950001	UNITED STATES	N	42522	42886	273	Other Research-Related	2016	135648	NIAAA	135648	coastal
NIMHD	9257685	42529	RFA-MD-15-006	7K99MD010468-02	7	K99	MD	10468	2		CASTILLE, DOROTHY M	42339	42735	ZMD1-MLS(10)	12480731	2	PSYCHOLOGY	50299031	K51LECU1G8N3	50299031	K51LECU1G8N3	US	29.717236	-95.402761	9291001	RICE U		Non_Elite	female	98	HOUSTON	TX	SCHOOLS OF ARTS AND SCIENCES	770051827	UNITED STATES	N	42529	42735	307	Other Research-Related	2016	98194	NIMHD	98194	#N/A
NIEHS	9109105	42531	PA-15-083	1K99ES025819-01A1	1	K99	ES	25819	1	A	NADADUR, SRIKANTH	42552	42916	ZES1-LKB-D(K9)	10119304	2	INTERNAL MEDICINE/MEDICINE	168559177	G15AG3BLLMH4	168559177	G15AG3BLLMH4	US	41.265996	-96.010026	578104	U OF NEBRASKA MED CTR		Non_Elite	female	94	OMAHA	NE	SCHOOLS OF MEDICINE	681987835	UNITED STATES	N	42552	42916	113	Other Research-Related	2016	89738	NIEHS	89738	coastal
NIBIB	9109978	42543	PA-15-083	1K99EB019501-01A1	1	K99	EB	19501	1	A	ERIM, ZEYNEP	42552	42735	ZEB1-OSR-E(J1)S	11832956	3	BIOCHEMISTRY	43207562	FL6GV84CKN57	43207562	FL6GV84CKN57	US	41.310925	-72.926428	9420201	YALE U		Elite	female	98	NEW HAVEN	CT	SCHOOLS OF ARTS AND SCIENCES	65208327	UNITED STATES	N	42552	42735	286	Other Research-Related	2016	50474	NIBIB	50474	#N/A
NICHD	9104166	42543	PA-14-042	5K99HD082337-02	5	K99	HD	82337	2		KROTOSKI, DANUTA	42190	42766	Developmental Biology Study Section[CHHD-C]	10741244	52	OTHER BASIC SCIENCES	804355790	UYTTZT6G9DT1	804355790	UYTTZT6G9DT1	US	32.876991	-117.24087	577507	U OF CALIFORNIA SAN DIEGO		Elite	female	96	LA JOLLA	CA	SCHOOLS OF MEDICINE	920930621	UNITED STATES	N	42552	42766	865	Other Research-Related	2016	138213	NICHD	138213	#N/A
NICHD	9119847	42545	PA-14-042	5K99HD081273-02	5	K99	HD	81273	2		ESPOSITO, LAYLA E	42219	42947	Health, Behavior, and Context Study Section[CHHD-M]	11206199	1	NONE	5421136	ZUE9HKT2CLC9	5421136	ZUE9HKT2CLC9	US	41.789554	-87.601172	1413601	U OF CHICAGO		Elite	female	100	CHICAGO	IL	SCHOOLS OF SOCIAL WELFARE/WORK	606372612	UNITED STATES	N	42552	42947	865	Other Research-Related	2016	105869	NICHD	105869	coastal
NICHD	9118264	42549	PA-14-042	5K99HD082412-02	5	K99	HD	82412	2		KOSO-THOMAS, MARION	42217	42947	Pediatrics Study Section[CHHD-A]	10829014	52	PEDIATRICS	804355790	UYTTZT6G9DT1	804355790	UYTTZT6G9DT1	US	32.876991	-117.24087	577507	U OF CALIFORNIA SAN DIEGO		Elite	female	98	LA JOLLA	CA	SCHOOLS OF MEDICINE	920930621	UNITED STATES	N	42583	42947	865	Other Research-Related	2016	137079	NICHD	137079	coastal
NCI	9165038	42550	PA-15-083	1K99CA208032-01	1	K99	CA	208032	1		SCHMIDT, MICHAEL K	42552	42766	Transition to Independence Study Section (I)[NCI-I]	11787688	8	Unavailable	73130411	FLJ7DQKLL226	73130411	FLJ7DQKLL226	US	42.363198	-71.068772	4907701	MASSACHUSETTS GENERAL HOSP		Elite	female	88	BOSTON	MA	Independent Hospitals	21142621	UNITED STATES	N	42552	42766	398	Other Research-Related	2016	180360	NCI	180360	coastal
NICHD	9119610	42552	PA-14-042	5K99HD084746-02	5	K99	HD	84746	2		MILLER, BRETT	42217	42947	Pediatrics Study Section[CHHD-A]	11950614	3	SOCIAL SCIENCES	42250712	GM1XX56LEP58	42250712	GM1XX56LEP58	US	39.953462	-75.193983	6463801	U OF PENNSYLVANIA		Elite	female	100	PHILADELPHIA	PA	SCHOOLS OF ARTS AND SCIENCES	191046205	UNITED STATES	N	42583	42947	865	Other Research-Related	2016	131298	NICHD	131298	#N/A
NCI	9124800	42564	PA-14-042	5K99CA194284-02	5	K99	CA	194284	2		RADAEV, SERGEY	42227	42685	Transition to Independence Study Section (I)[NCI-I]	10823411	7	Unavailable	76580745	DPMGH9MG1X67	76580745	DPMGH9MG1X67	US	42.337593	-71.108279	1464901	DANA FARBER CANCER INST		Elite	female	98	BOSTON	MA	Independent Hospitals	22155450	UNITED STATES	N	42583	42685	398	Other Research-Related	2016	172260	NCI	172260	coastal
NCI	9116181	42566	PA-14-042	5K99CA197315-03	5	K99	CA	197315	3		SCHMIDT, MICHAEL K	42248	42825	Transition to Independence Study Section (I)[NCI-I]	10873862	5	Unavailable	79917897	GYLUH9UXHDX5	79917897	GYLUH9UXHDX5	US	36.143784	-86.800995	10040927	VANDERBILT U MED CTR		Non_Elite	female	98	NASHVILLE	TN	Independent Hospitals	372320011	UNITED STATES	N	42614	42825	398	Other Research-Related	2016	92532	NCI	92532	#N/A
NIDCD	9053469	42566	PA-14-042	5K99DC014520-02	5	K99	DC	14520	2		RIVERA-RENTAS, ALBERTO L	42186	42978	ZDC1-SRB-K(15)	10310811	7	OTHER HEALTH PROFESSIONS	49435266	THL6A6JLE1S7	49435266	THL6A6JLE1S7	US	42.349594	-71.099726	10001093	BOSTON U (CHARLES RIVER CAMPUS)		Non_Elite	female	98	BOSTON	MA	SCH ALLIED HEALTH PROFESSIONS	22151390	UNITED STATES	N	42552	42978	173	Other Research-Related	2016	100038	NIDCD	100038	coastal
NCI	9040118	42570	PA-14-042	5K99CA190836-02	5	K99	CA	190836	2		SCHMIDT, MICHAEL K	42248	43100	Transition to Independence Study Section (I)[NCI-I]	10598952	7	Unavailable	78200995	HMSNCM57QNR5	78200995	HMSNCM57QNR5	US	47.627342	-122.331593	861001	FRED HUTCHINSON CANCER RES CTR		Elite	female	96	SEATTLE	WA	Research Institutes	981094433	UNITED STATES	N	42614	43100	398	Other Research-Related	2016	114372	NCI	114372	coastal
NIEHS	9115600	42572	PA-14-042	5K99ES024795-02	5	K99	ES	24795	2		BOYLES, ABEE	42217	42947	ZES1-LWJ-D(KC)	10995673	13	NONE	41544081	Y8CWNJRCNN91	41544081	Y8CWNJRCNN91	US	40.116857	-88.228755	577704	U OF ILLINOIS AT URBANA CHAMPAIGN		Non_Elite	female	98	CHAMPAIGN	IL	ORGANIZED RESEARCH UNITS	618207473	UNITED STATES	N	42583	42947	113	Other Research-Related	2016	99161	NIEHS	99161	coastal
NICHD	9119614	42573	PA-14-042	5K99HD083519-02	5	K99	HD	83519	2		KING, ROSALIND B	42217	42916	Population Sciences Study Section[CHHD-W]	9292288	4	SOCIAL SCIENCES	44387793	TP7EK8DZV6N5	44387793	TP7EK8DZV6N5	US	36.007766	-78.926475	2221101	DUKE U		Elite	female	98	DURHAM	NC	SCHOOLS OF ARTS AND SCIENCES	277054673	UNITED STATES	N	42583	42916	865	Other Research-Related	2016	91099	NICHD	91099	#N/A
NICHD	9123640	42577	PA-14-042	5K99HD084758-02	5	K99	HD	84758	2		ESPOSITO, LAYLA E	42226	42978	Health, Behavior, and Context Study Section[CHHD-M]	10602020	12	PSYCHIATRY	94878337	KMH5K9V7S518	94878337	KMH5K9V7S518	US	37.767442	-122.413937	577508	U OF CALIFORNIA SAN FRANCISCO		Elite	female	98	SAN FRANCISCO	CA	SCHOOLS OF MEDICINE	941432510	UNITED STATES	N	42583	42978	865	Other Research-Related	2016	135378	NICHD	135378	#N/A
NIGMS	9116919	42580	PA-14-042	5K99GM115868-02	5	K99	GM	115868	2		SESMA, MICHAEL A	42217	43131	ZGM1-TWD-A(KR)	10993605	8	Unavailable	73130411	FLJ7DQKLL226	73130411	FLJ7DQKLL226	US	42.363198	-71.068772	4907701	MASSACHUSETTS GENERAL HOSP		Elite	female	98	BOSTON	MA	Independent Hospitals	21142621	UNITED STATES	N	42583	43131	859	Other Research-Related	2016	89996	NIGMS	89996	coastal
NIGMS	9132279	42580	PA-14-042	5K99GM115765-02	5	K99	GM	115765	2		SESMA, MICHAEL A	42248	42978	ZGM1-TWD-A(KR)	8304043	13	BIOCHEMISTRY	124726725	GS3YEVSS12N6	124726725	GS3YEVSS12N6	US	37.870017	-122.268624	577502	U OF CALIFORNIA BERKELEY		Elite	female	99	BERKELEY	CA	SCHOOLS OF ARTS AND SCIENCES	947101749	UNITED STATES	N	42583	42978	859	Other Research-Related	2016	90000	NIGMS	90000	coastal
NIGMS	9115651	42583	PA-14-042	5K99GM113063-02	5	K99	GM	113063	2		SESMA, MICHAEL A	42217	42809	ZGM1-TWD-Y(KR)	10587197	2	ANATOMY/CELL BIOLOGY	603847393	MQE2JHHJW9Q8	603847393	MQE2JHHJW9Q8	US	42.2802	-71.758245	850903	U OF MASSACHUSETTS MED SCH WORCESTER		Non_Elite	female	99	WORCESTER	MA	SCHOOLS OF MEDICINE	16550002	UNITED STATES	N	42583	42809	859	Other Research-Related	2016	73345	NIGMS	73345	coastal
NCCIH	9127153	42586	PA-14-042	5K99AT008831-02	5	K99	AT	8831	2		MUDD, LANAY MARIE	42248	42978	ZAT1-SM(36)	11545824	3	NEUROLOGY	96997515	NPSNT86JKN51	96997515	NPSNT86JKN51	US	45.49882	-122.685647	6297007	OREGON HEALTH & SCI U		Non_Elite	female	97	PORTLAND	OR	SCHOOLS OF MEDICINE	972393098	UNITED STATES	N	42614	42978	213	Other Research-Related	2016	136733	NCCIH	136733	coastal
NEI	9115610	42586	PA-14-042	5K99EY025732-02	5	K99	EY	25732	2		AGARWAL, NEERAJ	42217	42947	ZEY1-VSN(02)	10819247	4	OPHTHALMOLOGY	44387793	TP7EK8DZV6N5	44387793	TP7EK8DZV6N5	US	36.007766	-78.926475	2221101	DUKE U		Elite	female	98	DURHAM	NC	SCHOOLS OF MEDICINE	277054673	UNITED STATES	N	42583	42947	867	Other Research-Related	2016	118593	NEI	118593	#N/A
NHLBI	9136850	42590	PA-14-042	5K99HL125899-02	5	K99	HL	125899	2		TIGNO, XENIA	42251	42978	ZHL1-CSR-P(O1)	12101407	12	INTERNAL MEDICINE/MEDICINE	60217502	YNT8TCJH8FQ8	60217502	YNT8TCJH8FQ8	US	40.7607	-73.9603	1514803	WEILL MED COLL OF CORNELL U		Elite	female	98	NEW YORK	NY	SCHOOLS OF MEDICINE	100654805	UNITED STATES	N	42614	42978	837	Other Research-Related	2016	152874	NHLBI	152874	coastal
NCI	9146322	42590	PA-15-083	5K99CA201075-02	5	K99	CA	201075	2		SCHMIDT, MICHAEL K	42265	42869	Transition to Independence Study Section (I)[NCI-I]	12161561	18	PATHOLOGY	9214214	HJD6G4D6TJY5	9214214	HJD6G4D6TJY5	US	37.426852	-122.17047	8046501	STANFORD U		Elite	female	67	STANFORD	CA	SCHOOLS OF MEDICINE	943052004	UNITED STATES	N	42614	42869	398	Other Research-Related	2016	173448	NCI	173448	coastal
NIEHS	9178860	42592	PA-15-083	1K99ES025776-01A1	1	K99	ES	25776	1	A	HUMBLE, MICHAEL C	42614	42742	ZES1-LWJ-J(K)	11870758	12	PUBLIC HEALTH & PREV MEDICINE	121911077	M5SZJ6VHUHN8	121911077	M5SZJ6VHUHN8	US	40.669895	-73.974354	5998304	NEW YORK U SCH OF MED		Elite	female	54	NEW YORK	NY	SCHOOLS OF MEDICINE	10016	UNITED STATES	N	42614	42742	113	Other Research-Related	2016	90000	NIEHS	90000	coastal
NIDCR	9134121	42593	PAR-14-057	5K99DE025053-02	5	K99	DE	25053	2		FRIEDEN, LESLIE A	42248	43190	NIDCR Special Grants Review Committee[DSR]	12203709	7	DENTISTRY	47006379	JDLVAVGYJQ21	47006379	JDLVAVGYJQ21	US	42.335672	-71.104237	3212902	HARVARD MED SCH		Elite	female	71	BOSTON	MA	SCHOOLS OF DENTISTRY/ORAL HYGN	21201616	UNITED STATES	N	42614	43190	121	Other Research-Related	2016	128007	NIDCR	128007	coastal
NINDS	9146705	42593	PA-15-083	5K99NS094735-02	5	K99	NS	94735	2		BABCOCK, DEBRA J	42277	43039	NST-2 Study Section [NST-2]	12461230	12	NEUROLOGY	121911077	M5SZJ6VHUHN8	121911077	M5SZJ6VHUHN8	US	40.669895	-73.974354	5998304	NEW YORK U SCH OF MED		Elite	female	98	NEW YORK	NY	SCHOOLS OF MEDICINE	10016	UNITED STATES	N	42614	43039	853	Other Research-Related	2016	94716	NINDS	94716	#N/A
NLM	9145776	42597	PA-15-083	5K99LM012238-02	5	K99	LM	12238	2		HARDY, LYNDA R	42267	42978	Biomedical Informatics, Library and Data Sciences Review Committee[BLR]	11976437	3	BIOSTATISTICS & OTHER MATH SCI	96997515	NPSNT86JKN51	96997515	NPSNT86JKN51	US	45.49882	-122.685647	6297007	OREGON HEALTH & SCI U		Non_Elite	female	97	PORTLAND	OR	SCHOOLS OF MEDICINE	972393098	UNITED STATES	N	42614	42978	879	Other Research-Related	2016	88767	NLM	88767	#N/A
NIGMS	9162833	42598	PA-15-083	1K99GM120453-01	1	K99	GM	120453	1		SESMA, MICHAEL A	42614	42951	ZGM1-TWD-A(KR)	9629492	9	GENETICS	51113330	FXKMA43NTV21	51113330	FXKMA43NTV21	US	29.70926	-95.400851	481201	BAYLOR COLL OF MED	2647	Non_Elite	female	98	HOUSTON	TX	SCHOOLS OF MEDICINE	770303411	UNITED STATES	N	42614	42951	77	Other Research-Related	2016	90000	NIGMS	90000	#N/A
NCI	9113528	42598	PA-14-042	5K99CA197762-02	5	K99	CA	197762	2		SCHMIDT, MICHAEL K	42217	42704	Transition to Independence Study Section (I)[NCI-I]	11639678	7	Unavailable	76580745	DPMGH9MG1X67	76580745	DPMGH9MG1X67	US	42.337593	-71.108279	1464901	DANA FARBER CANCER INST		Elite	female	98	BOSTON	MA	Independent Hospitals	22155450	UNITED STATES	N	42583	42704	398	Other Research-Related	2016	22628	NCI	22628	coastal
NIMH	9145789	42599	PA-15-083	5K99MH106642-02	5	K99	MH	106642	2		SARAMPOTE, CHRISTOPHER S	42268	42978	ZMH1-ERB-M(05)	10004258	3	PSYCHIATRY	47120084	TX2DAGQPENZ5	47120084	TX2DAGQPENZ5	US	38.543366	-121.72946	577503	U OF CALIFORNIA AT DAVIS		Non_Elite	female	99	DAVIS	CA	SCHOOLS OF MEDICINE	956186153	UNITED STATES	N	42614	42978	242	Other Research-Related	2016	82062	NIMH	82062	coastal
NHLBI	9179475	42601	PA-15-083	1K99HL130456-01A1	1	K99	HL	130456	1	A	MARIC-BILKAN, CHRISTINE	42643	42978	NHLBI Mentored Transition to Independence Study Section[MTI(MA)]	11535895	3	EMERGENCY MEDICINE	928824473	X59NJBFL8BJ3	928824473	X59NJBFL8BJ3	US	32.328724	-90.175537	5390304	U OF MISSISSIPPI MED CTR		Non_Elite	female	98	JACKSON	MS	SCHOOLS OF MEDICINE	392164500	UNITED STATES	N	42643	42978	837	Other Research-Related	2016	136210	NHLBI	136210	#N/A
NIMH	9146973	42602	PA-15-083	5K99MH108648-02	5	K99	MH	108648	2		DESMOND, NANCY L	42268	43039	ZMH1-ERB-M(05)	11420457	12	PHYSIOLOGY	94878337	KMH5K9V7S518	94878337	KMH5K9V7S518	US	37.767442	-122.413937	577508	U OF CALIFORNIA SAN FRANCISCO		Elite	female	98	SAN FRANCISCO	CA	SCHOOLS OF MEDICINE	941432510	UNITED STATES	N	42614	43039	242	Other Research-Related	2016	121022	NIMH	121022	#N/A
NIDDK	9127212	42604	PA-14-042	5K99DK105205-02	5	K99	DK	105205	2		RANKIN, TRACY L	42248	42978	Kidney, Urologic and Hematologic Diseases D Study Section[DDK-D]	10527799	12	MICROBIOLOGY/IMMUN/VIROLOGY	73133571	GNJ7BBP73WE9	73133571	GNJ7BBP73WE9	US	42.275494	-83.743038	1506502	U OF MICHIGAN AT ANN ARBOR		Elite	female	100	ANN ARBOR	MI	SCHOOLS OF MEDICINE	481091276	UNITED STATES	N	42614	42978	847	Other Research-Related	2016	90000	NIDDK	90000	coastal
NHLBI	9146368	42604	PA-14-042	5K99HL125728-02	5	K99	HL	125728	2		COLOMBINI-HATCH, SANDRA	42265	42978	ZHL1-CSR-P(O1)	12090673	8	Unavailable	73130411	FLJ7DQKLL226	73130411	FLJ7DQKLL226	US	42.363198	-71.068772	4907701	MASSACHUSETTS GENERAL HOSP		Elite	female	99	BOSTON	MA	Independent Hospitals	21142621	UNITED STATES	N	42614	42978	837	Other Research-Related	2016	173800	NHLBI	173800	coastal
NINDS	9146436	42607	PA-15-083	5K99NS089938-02	5	K99	NS	89938	2		LEENDERS, MIRIAM	42277	42704	NST-2 Study Section [NST-2]	10243807	18	NEUROLOGY	9214214	HJD6G4D6TJY5	9214214	HJD6G4D6TJY5	US	37.426852	-122.17047	8046501	STANFORD U		Elite	female	99	STANFORD	CA	SCHOOLS OF MEDICINE	943052004	UNITED STATES	N	42614	42704	853	Other Research-Related	2016	92124	NINDS	92124	coastal
NIMH	9147001	42608	PA-15-083	5K99MH108720-02	5	K99	MH	108720	2		DESMOND, NANCY L	42268	42978	ZMH1-ERB-M(05)	11182582	12	PSYCHIATRY	94878337	KMH5K9V7S518	94878337	KMH5K9V7S518	US	37.767442	-122.413937	577508	U OF CALIFORNIA SAN FRANCISCO		Elite	female	99	SAN FRANCISCO	CA	SCHOOLS OF MEDICINE	941432510	UNITED STATES	N	42614	42978	242	Other Research-Related	2016	87779	NIMH	87779	coastal
NIDDK	9146873	42608	PA-15-083	5K99DK105160-02	5	K99	DK	105160	2		RANKIN, TRACY L	42268	43131	Kidney, Urologic and Hematologic Diseases D Study Section[DDK-D]	11861813	5	PHYSIOLOGY	937639060	E8VWJXMMUQ67	937639060	E8VWJXMMUQ67	US	43.04575	-88.020374	46001	MED COLL OF WISCONSIN		Non_Elite	female	97	MILWAUKEE	WI	SCHOOLS OF MEDICINE	532263548	UNITED STATES	N	42634	43131	847	Other Research-Related	2016	88178	NIDDK	88178	coastal
NHGRI	9146372	42608	PA-15-083	5K99HG008819-02	5	K99	HG	8819	2		BOYER, JOY	42265	42978	Societal and Ethical Issues in Research Study Section[SEIR]	11439840	4	OTHER HEALTH PROFESSIONS	608195277	D3LHU66KBLD5	608195277	D3LHU66KBLD5	US	35.9316	-79.057377	578206	U OF NORTH CAROLINA CHAPEL HILL		Elite	female	99	CHAPEL HILL	NC	SCHOOLS OF MEDICINE	275995023	UNITED STATES	N	42614	42978	172	Other Research-Related	2016	91113	NHGRI	91113	coastal
NIMH	9146970	42614	PA-15-083	5K99MH106731-02	5	K99	MH	106731	2		VAN'T VEER, ASHLEE V	42268	43281	ZMH1-ERB-M(05)	9298440	13	Unavailable	167204994	TYVNMW8FNQQ3	167204994	TYVNMW8FNQQ3	US	40.843076	-73.944206	1590919	NEW_YORK_STATE_PSY		Non_Elite	female	99	NEW YORK	NY	Independent Hospitals	100321007	UNITED STATES	N	42614	43281	242	Other Research-Related	2016	129968	NIMH	129968	coastal
NEI	9164383	42641	PA-15-083	1K99EY026997-01	1	K99	EY	26997	1		AGARWAL, NEERAJ	42643	42766	ZEY1-VSN(05)	12601970	12	Unavailable	73121105	VT22KLLMNQL6	73121105	VT22KLLMNQL6	US	37.791185	-122.43391	1842901	SMITH KETTLEWELL EYE RES INST		Non_Elite	female	97	SAN FRANCISCO	CA	Research Institutes	941151813	UNITED STATES	N	42643	42766	867	Other Research-Related	2016	34683	NEI	34683	#N/A
NIDA	9121511	42689	PA-14-042	5K99DA040154-02	5	K99	DA	40154	2		LIN, YU	42277	43343	ZDA1-HXO-H(05)S	9108667	18	ANESTHESIOLOGY	9214214	HJD6G4D6TJY5	9214214	HJD6G4D6TJY5	US	37.426852	-122.17047	8046501	STANFORD U		Elite	female	99	STANFORD	CA	SCHOOLS OF MEDICINE	943052004	UNITED STATES	N	42705	43343	279	Other Research-Related	2017	174820	NIDA	174820	#N/A
NIMHD	9230864	42697	RFA-MD-15-006	5K99MD010471-02	5	K99	MD	10471	2		CASTILLE, DOROTHY M	42423	43100	ZMD1-MLS(10)	11810409	40	Unavailable	66685553	QAXKFGHBCMX3	66685553	QAXKFGHBCMX3	US	33.929099	-118.157999	2796101	RANCHO RES INST		Non_Elite	female	97	DOWNEY	CA	Other Domestic Non-Profits	902423456	UNITED STATES	N	42705	43100	307	Other Research-Related	2017	132943	NIMHD	132943	coastal
NIAAA	9320150	42704	PA-16-285	7K99AA023002-03	7	K99	AA	23002	3		LIU, QI-YING	42231	42947	Neuroscience and Behavior Study Section[AA-4]	8796432	4	Unavailable	608195277	D3LHU66KBLD5	608195277	D3LHU66KBLD5	US	35.9316	-79.057377	578206	U OF NORTH CAROLINA CHAPEL HILL		Elite	female	98	CHAPEL HILL	NC	Domestic Higher Education	275995023	UNITED STATES	N	42614	42947	273	Other Research-Related	2016	141750	NIAAA	141750	coastal
NHLBI	9205257	42727	PA-15-083	5K99HL127302-02	5	K99	HL	127302	2		WANG, WAYNE C	42384	42854	NHLBI Mentored Transition to Independence Study Section[MTI(OA)]	12162716	33	PHYSIOLOGY	92530369	RN64EPNH8JC6	92530369	RN64EPNH8JC6	US	34.070199	-118.45102	577505	U OF CALIFORNIA LOS ANGELES		Elite	female	99	LOS ANGELES	CA	SCHOOLS OF MEDICINE	900952000	UNITED STATES	N	42736	42854	837	Other Research-Related	2017	120074	NHLBI	120074	coastal
NIAAA	9379322	42748	PA-16-285	7K99AA023559-03	7	K99	AA	23559	3		LIU, QI-YING	42125	42855	Neuroscience and Behavior Study Section[AA-4]	10884190	12	PHARMACOLOGY	60217502	YNT8TCJH8FQ8	60217502	YNT8TCJH8FQ8	US	40.7607	-73.9603	1514803	WEILL MED COLL OF CORNELL U		Elite	female	97	NEW YORK	NY	SCHOOLS OF MEDICINE	100654805	UNITED STATES	N	42675	42855	273	Other Research-Related	2016	112612	NIAAA	112612	coastal
NIMH	9212198	42767	PA-15-083	5K99MH106744-02	5	K99	MH	106744	2		VAN'T VEER, ASHLEE V	42401	43343	ZMH1-ERB-M(05)	10891566	12	OTOLARYNGOLOGY	121911077	M5SZJ6VHUHN8	121911077	M5SZJ6VHUHN8	US	40.669895	-73.974354	5998304	NEW YORK U SCH OF MED		Elite	female	97	NEW YORK	NY	SCHOOLS OF MEDICINE	10016	UNITED STATES	N	42767	43343	242	Other Research-Related	2017	131274	NIMH	131274	#N/A
NHLBI	9233182	42782	PA-15-083	5K99HL122503-02	5	K99	HL	122503	2		WELNIAK, LISBETH A	42430	43251	NHLBI Mentored Transition to Independence Study Section[MTI(OA)]	11816127	12	Unavailable	64931884	KUKXRCZ6NZC2	64931884	KUKXRCZ6NZC2	US	40.764045	-73.956024	5079202	SLOAN KETTERING INST CAN RES		Non_Elite	female	97	NEW YORK	NY	Research Institutes	100656007	UNITED STATES	N	42795	43251	839	Other Research-Related	2017	137727	NHLBI	137727	coastal
NCI	9421372	42783	PA-16-285	7K99CA201601-02	7	K99	CA	201601	2		RADAEV, SERGEY	42795	42916	Transition to Independence Study Section (I)[NCI-I]	9297201	7	RADIATION-DIAGNOSTIC/ONCOLOGY	63690705	YND4PLMC9AN7	63690705	YND4PLMC9AN7	US	33.50591	-86.799772	1288803	U OF ALABAMA AT BIRMINGHAM		Non_Elite	female	96	BIRMINGHAM	AL	SCHOOLS OF MEDICINE	352940001	UNITED STATES	N	42795	42916	398	Other Research-Related	2017	95705	NCI	95705	coastal
NCI	9248312	42789	PA-15-083	5K99CA201304-02	5	K99	CA	201304	2		RADAEV, SERGEY	42461	43100	Transition to Independence Study Section (I)[NCI-I]	11575070	18	RADIATION-DIAGNOSTIC/ONCOLOGY	9214214	HJD6G4D6TJY5	9214214	HJD6G4D6TJY5	US	37.426852	-122.17047	8046501	STANFORD U		Elite	female	60	STANFORD	CA	SCHOOLS OF MEDICINE	943052004	UNITED STATES	N	42826	43100	398	Other Research-Related	2017	99550	NCI	99550	coastal
NCI	9256447	42789	PA-15-083	5K99CA204595-02	5	K99	CA	204595	2		RADAEV, SERGEY	42475	42916	Transition to Independence Study Section (I)[NCI-I]	12309612	1	PATHOLOGY	5421136	ZUE9HKT2CLC9	5421136	ZUE9HKT2CLC9	US	41.789554	-87.601172	1413601	U OF CHICAGO		Elite	female	98	CHICAGO	IL	SCHOOLS OF MEDICINE	606372612	UNITED STATES	N	42826	42916	398	Other Research-Related	2017	35418	NCI	35418	coastal
NICHD	9222251	42792	PA-16-077	1K99HD090198-01	1	K99	HD	90198	1		ILEKIS, JOHN V	42795	43159	Obstetrics and Maternal-Fetal Biology Study Section[CHHD-B]	11644054	7	ENGINEERING (ALL TYPES)	605799469	HD1WMN6945W6	605799469	HD1WMN6945W6	US	47.660307	-122.315168	9087701	U OF WASHINGTON		Elite	female	98	SEATTLE	WA	SCHOOLS OF MEDICINE	981959472	UNITED STATES	N	42795	43159	865	Other Research-Related	2017	107984	NICHD	107984	coastal
NICHD	9246552	42796	PA-15-083	5K99HD084759-02	5	K99	HD	84759	2		RAVINDRANATH, NEELAKANTA	42461	43159	Reproduction, Andrology, and Gynecology Study Section[CHHD-R]	11148782	52	OBSTETRICS & GYNECOLOGY	804355790	UYTTZT6G9DT1	804355790	UYTTZT6G9DT1	US	32.876991	-117.24087	577507	U OF CALIFORNIA SAN DIEGO		Elite	female	97	LA JOLLA	CA	SCHOOLS OF MEDICINE	920930621	UNITED STATES	N	42826	43159	865	Other Research-Related	2017	99883	NICHD	99883	#N/A
NINDS	9237325	42804	PA-15-083	5K99NS096217-02	5	K99	NS	96217	2		GUBITZ, AMELIE	42461	43007	NST-2 Study Section [NST-2]	11913358	12	ENGINEERING (ALL TYPES)	2484665	NJ1YPQXQG7U5	2484665	NJ1YPQXQG7U5	US	40.345441	-74.655866	6661401	PRINCETON U		Elite	female	96	Princeton	NJ	BIOMED ENGR/COL ENGR/ENGR STA	85406000	UNITED STATES	N	42826	43007	853	Other Research-Related	2017	27888	NINDS	27888	coastal
NICHD	9252500	42808	PA-15-083	5K99HD082350-02	5	K99	HD	82350	2		WHITE, DELLA	42461	43190	Health, Behavior, and Context Study Section[CHHD-M]	10791660	7	OTHER HEALTH PROFESSIONS	1910777	FTMTDMBR29C7	1910777	FTMTDMBR29C7	US	39.325256	-76.605131	4134401	JOHNS HOPKINS U		Elite	female	93	BALTIMORE	MD	SCHOOLS OF NURSING	212182680	UNITED STATES	N	42826	43190	865	Other Research-Related	2017	135943	NICHD	135943	coastal
NINDS	9292962	42810	PA-16-193	1K99NS100988-01	1	K99	NS	100988	1		MILLER, DANIEL L	42856	43100	NST-2 Study Section [NST-2]	9569126	12	BIOCHEMISTRY	94878337	KMH5K9V7S518	94878337	KMH5K9V7S518	US	37.767442	-122.413937	577508	U OF CALIFORNIA SAN FRANCISCO		Elite	female	99	SAN FRANCISCO	CA	SCHOOLS OF MEDICINE	941432510	UNITED STATES	N	42856	43100	853	Other Research-Related	2017	88020	NINDS	88020	#N/A
NCI	9257330	42811	PA-15-083	5K99CA201228-02	5	K99	CA	201228	2		SCHMIDT, MICHAEL K	42475	42947	Transition to Independence Study Section (I)[NCI-I]	12529574	30	PEDIATRICS	800771545	YZJ6DKPM4W63	800771545	YZJ6DKPM4W63	US	32.811963	-96.837534	578404	UT SOUTHWESTERN MED CTR		Non_Elite	female	98	DALLAS	TX	SCHOOLS OF MEDICINE	753909105	UNITED STATES	N	42826	42947	398	Other Research-Related	2017	109966	NCI	109966	coastal
NIMH	9271247	42814	PA-15-083	5K99MH109633-02	5	K99	MH	109633	2		DRISCOLL, JAMIE	42500	43343	ZMH1-ERB-S(01)	11674940	12	PSYCHIATRY	94878337	KMH5K9V7S518	94878337	KMH5K9V7S518	US	37.767442	-122.413937	577508	U OF CALIFORNIA SAN FRANCISCO		Elite	female	98	SAN FRANCISCO	CA	SCHOOLS OF MEDICINE	941432510	UNITED STATES	N	42856	43343	242	Other Research-Related	2017	121230	NIMH	121230	coastal
NINDS	9259811	42815	PA-15-083	5K99NS096116-02	5	K99	NS	96116	2		BELLGOWAN, PATRICK S F	42475	43220	NST-2 Study Section [NST-2]	10565424	37	OPHTHALMOLOGY	72933393	G88KLJR3KYT5	72933393	G88KLJR3KYT5	US	34.017282	-118.281254	7636101	U OF SOUTHERN CALIFORNIA		Non_Elite	female	98	Los Angeles	CA	SCHOOLS OF MEDICINE	900894304	UNITED STATES	N	42826	43220	853	Other Research-Related	2017	87750	NINDS	87750	coastal
NICHD	9458385	42822	PA-14-042	3K99HD079668-02S1	3	K99	HD	79668	2	S	ESPOSITO, LAYLA E	42125	42978	Biobehavioral and Behavioral Sciences Study Section[CHHD-H]	10116944	13	PSYCHIATRY	621889815	QHF5ZZ114M72	621889815	QHF5ZZ114M72	US	40.8415	-73.9414	1833205	COLUMBIA U HEALTH SCI		Elite	female	98	NEW YORK	NY	SCHOOLS OF MEDICINE	100323725	UNITED STATES	N	42823	42978	865	Other Research-Related	2017	18036	NICHD	18036	coastal
NICHD	9247239	42822	PA-15-083	5K99HD086270-03	5	K99	HD	86270	3		KING, ROSALIND B	42614	42978	Population Sciences Study Section[CHHD-W]	10340618	4	PUBLIC HEALTH & PREV MEDICINE	608195277	D3LHU66KBLD5	608195277	D3LHU66KBLD5	US	35.9316	-79.057377	578206	U OF NORTH CAROLINA CHAPEL HILL		Elite	female	99	CHAPEL HILL	NC	SCHOOLS OF PUBLIC HEALTH	275995023	UNITED STATES	N	42826	42978	865	Other Research-Related	2017	120717	NICHD	120717	coastal
NCI	9295277	42824	PA-16-193	1K99CA215362-01	1	K99	CA	215362	1		SCHMIDT, MICHAEL K	42832	43089	Transition to Independence Study Section (I)[NCI-I]	12009461	3	Unavailable	65968786	GV31TMFLPY88	65968786	GV31TMFLPY88	US	40.86755	-73.473456	4577101	COLD SPRING HARBOR lab		Non_Elite	female	98	COLD SPRING HARBOR	NY	Research Institutes	117242209	UNITED STATES	N	42832	43089	397	Other Research-Related	2017	65294	NCI	65294	#N/A
NIAAA	9253343	42824	PA-15-083	5K99AA024208-02	5	K99	AA	24208	2		LIU, QI-YING	42465	43190	ZAA1-DD(04)	8771183	1	NEUROSCIENCES	183710748	NHV3GTWSALA7	183710748	NHV3GTWSALA7	US	32.786754	-79.947265	7575301	MED U OF SOUTH CAROLINA		Non_Elite	female	99	CHARLESTON	SC	SCHOOLS OF MEDICINE	294074636	UNITED STATES	N	42826	43190	273	Other Research-Related	2017	133879	NIAAA	133879	coastal
NHLBI	9238791	42825	PA-15-083	5K99HL130580-02	5	K99	HL	130580	2		PAPANICOLAOU, GEORGE	42461	42978	NHLBI Mentored Transition to Independence Study Section[MTI(JA)]	11220999	4	PUBLIC HEALTH & PREV MEDICINE	608195277	D3LHU66KBLD5	608195277	D3LHU66KBLD5	US	35.9316	-79.057377	578206	U OF NORTH CAROLINA CHAPEL HILL		Elite	female	98	CHAPEL HILL	NC	SCHOOLS OF PUBLIC HEALTH	275995023	UNITED STATES	N	42826	42978	837	Other Research-Related	2017	108460	NHLBI	108460	coastal
NIEHS	9265849	42842	PA-15-083	5K99ES026653-02	5	K99	ES	26653	2		SHAUGHNESSY, DANIEL	42491	43220	ZES1-LKB-D(K9)	9458652	52	Unavailable	627922248	ESJQL5U9JYM3	627922248	ESJQL5U9JYM3	US	32.875761	-117.239541	2384603	LUDWIG INST FOR CANCER RES LTD		Non_Elite	female	98	LA JOLLA	CA	Research Institutes	920930660	UNITED STATES	N	42856	43220	113	Other Research-Related	2017	66515	NIEHS	66515	coastal
NIA	9248243	42842	PA-15-083	5K99AG050490-02	5	K99	AG	50490	2		WISE, BRADLEY C	42461	43190	Basic Neuroscience of Aging Study Section[NIA-N]	9294596	3	NEUROLOGY	16060860	YXJGGNC5J269	16060860	YXJGGNC5J269	US	39.026584	-94.636347	1484303	U OF KANSAS MED CTR		Non_Elite	female	97	KANSAS CITY	KS	SCHOOLS OF MEDICINE	661608500	UNITED STATES	N	42856	43190	866	Other Research-Related	2017	133920	NIA	133920	#N/A
NIEHS	9266407	42845	PA-15-083	5K99ES025817-02	5	K99	ES	25817	2		JOUBERT, BONNIE	42491	42886	ZES1-LKB-D(K9)	9552884	6	PUBLIC HEALTH & PREV MEDICINE	41096314	MW8JHK6ZYEX8	41096314	MW8JHK6ZYEX8	US	39.745098	-104.837605	1199905	U OF COLORADO DENVER		Non_Elite	female	98	Aurora	CO	SCHOOLS OF PUBLIC HEALTH	800452570	UNITED STATES	N	42856	42886	113	Other Research-Related	2017	79277	NIEHS	79277	#N/A
NCCIH	9215635	42846	PA-15-083	5K99AT009156-02	5	K99	AT	9156	2		MUDD, LANAY MARIE	42491	43343	ZDA1-HXO-H(01)S	11472927	8	PUBLIC HEALTH & PREV MEDICINE	193247145	R28EKN92ZTZ9	193247145	R28EKN92ZTZ9	US	42.653979	-84.492032	5245901	MICHIGAN STATE U	2551	Non_Elite	female	97	EAST LANSING	MI	SCHOOLS OF MEDICINE	488242600	UNITED STATES	N	42856	43343	213	Other Research-Related	2017	90591	NCCIH	90591	coastal
NIA	9337336	42850	PA-15-083	5K99AG053410-02	5	K99	AG	53410	2		ANDERSON, DALLAS	42614	43100	Basic Neuroscience of Aging Study Section[NIA-N]	11289462	12	PUBLIC HEALTH & PREV MEDICINE	94878337	KMH5K9V7S518	94878337	KMH5K9V7S518	US	37.767442	-122.413937	577508	U OF CALIFORNIA SAN FRANCISCO		Elite	female	99	SAN FRANCISCO	CA	SCHOOLS OF MEDICINE	941432510	UNITED STATES	N	42856	43100	866	Other Research-Related	2017	126327	NIA	126327	coastal
NHLBI	9268568	42851	PA-15-083	5K99HL129196-02	5	K99	HL	129196	2		CHARETTE, MARC F	42491	43100	NHLBI Mentored Transition to Independence Study Section[MTI(JA)]	78127506	4	PHARMACOLOGY	153890272	SZPJL5ZRCLF4	153890272	SZPJL5ZRCLF4	US	38.948231	-92.327335	578002	U OF MISSOURI COLUMBIA		Non_Elite	female	98	COLUMBIA	MO	SCHOOLS OF MEDICINE	652110001	UNITED STATES	N	42856	43100	837	Other Research-Related	2017	88420	NHLBI	88420	#N/A
NHLBI	9274098	42851	PA-15-083	5K99HL128787-02	5	K99	HL	128787	2		MCDONALD, CHERYL	42505	43220	NHLBI Mentored Transition to Independence Study Section[MTI(JA)]	9448427	28	Unavailable	75307785	NCSMA19DF7E6	75307785	NCSMA19DF7E6	US	34.076544	-118.380004	1225501	CEDARS SINAI MED CTR		Non_Elite	female	98	LOS ANGELES	CA	Independent Hospitals	900481804	UNITED STATES	N	42856	43220	837	Other Research-Related	2017	170992	NHLBI	170992	#N/A
NIDA	9259957	42856	PA-15-083	5K99DA041469-02	5	K99	DA	41469	2		LIN, YU	42491	43312	ZDA1-SXM-M(03)S	9171888	18	Unavailable	148230662	MGUCX773RNJ8	148230662	MGUCX773RNJ8	US	26.885174	-80.11392	10005569	SCRIPPS FLORIDA		Non_Elite	female	98	JUPITER	FL	Research Institutes	334585284	UNITED STATES	N	42856	43312	279	Other Research-Related	2017	160220	NIDA	160220	coastal
NIDA	9260773	42856	PA-15-083	5K99DA041462-02	5	K99	DA	41462	2		LIN, YU	42491	43220	ZDA1-SXM-M(03)S	9638250	1	NEUROSCIENCES	183710748	NHV3GTWSALA7	183710748	NHV3GTWSALA7	US	32.786754	-79.947265	7575301	MED U OF SOUTH CAROLINA		Non_Elite	female	96	CHARLESTON	SC	SCHOOLS OF MEDICINE	294074636	UNITED STATES	N	42856	43220	279	Other Research-Related	2017	133368	NIDA	133368	coastal
NIDA	9262892	42856	PA-14-042	5K99DA040016-02	5	K99	DA	40016	2		SORENSEN, ROGER	42491	42978	ZDA1-HXO-H(05)S	12402452	33	NONE	92530369	RN64EPNH8JC6	92530369	RN64EPNH8JC6	US	34.070199	-118.45102	577505	U OF CALIFORNIA LOS ANGELES		Elite	female	98	LOS ANGELES	CA	SCHOOLS OF MEDICINE	900952000	UNITED STATES	N	42856	42978	279	Other Research-Related	2017	158544	NIDA	158544	#N/A
NIA	9335241	42858	PA-15-083	5K99AG052642-02	5	K99	AG	52642	2		NIELSEN, LISBETH	42614	43312	Behavior and Social Science of Aging Study Section[NIA-S]	11536120	3	DENTISTRY	969663814	NNFQH1JAPEP3	969663814	NNFQH1JAPEP3	US	29.643443	-82.349637	513806	U OF FLORIDA	2358	Non_Elite	female	98	GAINESVILLE	FL	SCHOOLS OF DENTISTRY/ORAL HYGN	326115500	UNITED STATES	N	42870	43312	866	Other Research-Related	2017	115276	NIA	115276	coastal
NIMH	9258497	42859	PA-15-083	5K99MH109569-02	5	K99	MH	109569	2		VAN'T VEER, ASHLEE V	42475	42855	ZMH1-ERB-S(01)	8782897	18	BIOMEDICAL ENGINEERING	9214214	HJD6G4D6TJY5	9214214	HJD6G4D6TJY5	US	37.426852	-122.17047	8046501	STANFORD U		Elite	female	99	STANFORD	CA	SCHOOLS OF MEDICINE	943052004	UNITED STATES	N	42826	42855	242	Other Research-Related	2017	8275	NIMH	8275	#N/A
NIA	9322278	42867	PA-15-083	5K99AG053412-02	5	K99	AG	53412	2		MACKIEWICZ, MIROSLAW	42583	43616	Basic Neuroscience of Aging Study Section[NIA-N]	11896062	1	INTERNAL MEDICINE/MEDICINE	68552207	L6NFUM28LQM5	68552207	L6NFUM28LQM5	US	38.664368	-90.323797	9083901	WASHINGTON U		Non_Elite	female	97	SAINT LOUIS	MO	SCHOOLS OF MEDICINE	631304862	UNITED STATES	N	42887	43616	866	Other Research-Related	2017	83102	NIA	83102	#N/A
NIA	9353285	42867	PA-15-083	5K99AG056054-02	5	K99	AG	56054	2		ANDERSON, DALLAS	42643	43251	Nursing Science Review Committee[NRRC(65)]	10520314	12	NONE	3403953	NPM2J7MSCF61	3403953	NPM2J7MSCF61	US	40.870717	-77.83415	1524202	PENNSYLVANIA STATE		Non_Elite	female	97	UNIVERSITY PARK	PA	SCHOOLS OF NURSING	168027000	UNITED STATES	N	42887	43251	866	Other Research-Related	2017	96066	NIA	96066	coastal
NIA	9340058	42867	PA-15-083	5K99AG052830-02	5	K99	AG	52830	2		WAGSTER, MOLLY V	42614	43343	Behavior and Social Science of Aging Study Section[NIA-S]	10753709	4	PUBLIC HEALTH & PREV MEDICINE	608195277	D3LHU66KBLD5	608195277	D3LHU66KBLD5	US	35.9316	-79.057377	578206	U OF NORTH CAROLINA CHAPEL HILL		Elite	female	96	CHAPEL HILL	NC	SCHOOLS OF PUBLIC HEALTH	275995023	UNITED STATES	N	42887	43343	866	Other Research-Related	2017	73525	NIA	73525	coastal
NIA	9327853	42873	PA-15-083	5K99AG051738-02	5	K99	AG	51738	2		GUO, MAX	42614	43708	Biological Aging Study Section[NIA-B]	11288783	18	GENETICS	9214214	HJD6G4D6TJY5	9214214	HJD6G4D6TJY5	US	37.426852	-122.17047	8046501	STANFORD U		Elite	female	97	STANFORD	CA	SCHOOLS OF MEDICINE	943052004	UNITED STATES	N	42887	43708	866	Other Research-Related	2017	100466	NIA	100466	coastal
NIMHD	9360576	42874	PA-16-077	5K99MD011304-02	5	K99	MD	11304	2		DAGHER, RADA K	42640	43616	ZMD1-XLN(08)	12477188	2	BIOCHEMISTRY	50299031	K51LECU1G8N3	50299031	K51LECU1G8N3	US	29.717236	-95.402761	9291001	RICE U	542	Non_Elite	female	96	HOUSTON	TX	SCHOOLS OF ARTS AND SCIENCES	770051827	UNITED STATES	N	42887	43616	307	Other Research-Related	2017	128736	NIMHD	128736	coastal
NIA	9344519	42879	PA-15-083	5K99AG051735-02	5	K99	AG	51735	2		KERR, CANDACE L	42614	43616	Biological Aging Study Section[NIA-B]	12230016	7	PATHOLOGY	605799469	HD1WMN6945W6	605799469	HD1WMN6945W6	US	47.660307	-122.315168	9087701	U OF WASHINGTON		Elite	female	89	SEATTLE	WA	SCHOOLS OF MEDICINE	981959472	UNITED STATES	N	42887	43616	866	Other Research-Related	2017	132867	NIA	132867	#N/A
NICHD	9264003	42881	PA-15-083	5K99HD084749-02	5	K99	HD	84749	2		MILLER, BRETT	42522	43708	Biobehavioral and Behavioral Sciences Study Section[CHHD-H]	11211696	18	PEDIATRICS	9214214	HJD6G4D6TJY5	9214214	HJD6G4D6TJY5	US	37.426852	-122.17047	8046501	STANFORD U		Elite	female	99	STANFORD	CA	SCHOOLS OF MEDICINE	943052004	UNITED STATES	N	42887	43708	865	Other Research-Related	2017	127683	NICHD	127683	coastal
NIAMS	9288127	42887	PA-15-083	5K99AR068582-02	5	K99	AR	68582	2		WANG, FEI	42527	43251	Arthritis and Musculoskeletal and Skin Diseases Special Grants Study Section[AMS]	11897008	7	ORTHOPEDICS	604483045	FBYMGMHW4X95	604483045	FBYMGMHW4X95	US	42.33639	-71.07097	894901	BOSTON U MED CAMPUS	1959	Non_Elite	female	99	BOSTON	MA	SCHOOLS OF MEDICINE	21182340	UNITED STATES	N	42887	43251	846	Other Research-Related	2017	90180	NIAMS	90180	coastal
NIGMS	9305097	42887	PA-15-083	5K99GM118826-02	5	K99	GM	118826	2		SESMA, MICHAEL A	42552	43251	ZGM1-TWD-A(KR)	11324296	4	BIOLOGY	608195277	D3LHU66KBLD5	608195277	D3LHU66KBLD5	US	35.9316	-79.057377	578206	U OF NORTH CAROLINA CHAPEL HILL		Elite	female	98	CHAPEL HILL	NC	SCHOOLS OF ARTS AND SCIENCES	275995023	UNITED STATES	N	42887	43251	859	Other Research-Related	2017	81314	NIGMS	81314	#N/A
NIDCR	9302734	42892	PA-15-083	5K99DE026239-02	5	K99	DE	26239	2		FRIEDEN, LESLIE A	42552	43646	NIDCR Special Grants Review Committee[DSR]	11324537	37	ORTHOPEDICS	72933393	G88KLJR3KYT5	72933393	G88KLJR3KYT5	US	34.017282	-118.281254	7636101	U OF SOUTHERN CALIFORNIA		Non_Elite	female	97	Los Angeles	CA	SCHOOLS OF MEDICINE	900894304	UNITED STATES	N	42917	43646	121	Other Research-Related	2017	126225	NIDCR	126225	#N/A
NHLBI	9274381	42894	PA-15-083	5K99HL130581-02	5	K99	HL	130581	2		HUANG, LI-SHIN	42552	43496	NHLBI Mentored Transition to Independence Study Section[MTI(OA)]	11264816	3	PHARMACOLOGY	43207562	FL6GV84CKN57	43207562	FL6GV84CKN57	US	41.310925	-72.926428	9420201	YALE U		Elite	female	98	NEW HAVEN	CT	SCHOOLS OF MEDICINE	65208327	UNITED STATES	N	42917	43496	837	Other Research-Related	2017	107203	NHLBI	107203	coastal
NICHD	9265483	42895	PA-15-083	5K99HD087527-02	5	K99	HD	87527	2		WINER, KAREN	42491	42915	Obstetrics and Maternal-Fetal Biology Study Section[CHHD-B]	14102151	12	INTERNAL MEDICINE/MEDICINE	966668691	N4WWJC8T2593	809593387; 966668691	JJJNQAJY5RN6; N4WWJC8T2593	US	33.470962	-81.991405	676605	AUGUSTA U		Non_Elite	female	98	AUGUSTA	GA	SCHOOLS OF MEDICINE	309120004	UNITED STATES	N	42856	42915	865	Other Research-Related	2017	67043	NICHD	67043	coastal
NIAID	9385578	42900	PA-16-193	1K99AI127932-01A1	1	K99	AI	127932	1	A	EICHELBERG, KATRIN	42917	43121	Microbiology and Infectious Diseases Advisory Committee[MID]	11814871	12	GENETICS	71037113	LHGDNJMZ64Y1	71037113	LHGDNJMZ64Y1	US	40.763746	-73.955386	7056601	ROCKEFELLER U		Non_Elite	female	98	NEW YORK	NY	GRADUATE SCHOOLS	100656399	UNITED STATES	N	42917	43121	855	Other Research-Related	2017	121163	NIAID	121163	coastal
NCI	9307772	42906	PA-15-083	5K99CA201606-02	5	K99	CA	201606	2		SCHMIDT, MICHAEL K	42552	43343	Transition to Independence Study Section (I)[NCI-I]	11372316	7	Unavailable	76580745	DPMGH9MG1X67	76580745	DPMGH9MG1X67	US	42.337593	-71.108279	1464901	DANA FARBER CANCER INST		Elite	female	97	BOSTON	MA	Independent Hospitals	22155450	UNITED STATES	N	42917	43343	398	Other Research-Related	2017	126232	NCI	126232	coastal
NCI	9312261	42906	PA-15-083	5K99CA208012-02	5	K99	CA	208012	2		SCHMIDT, MICHAEL K	42557	43646	ZCA1-RTRB-4(M1)	11443620	3	Unavailable	75524595	DW1XZMGNFBL4	75524595	DW1XZMGNFBL4	US	39.951288	-75.195771	9340401	WISTAR INST		Non_Elite	female	97	PHILADELPHIA	PA	Research Institutes	191044265	UNITED STATES	N	42917	43646	398	Other Research-Related	2017	114152	NCI	114152	#N/A
NCI	9352673	42912	PA-15-083	5K99CA207848-02	5	K99	CA	207848	2		RADAEV, SERGEY	42558	43159	Transition to Independence Study Section (I)[NCI-I]	11952116	5	Unavailable	79917897	GYLUH9UXHDX5	79917897	GYLUH9UXHDX5	US	36.143784	-86.800995	10040927	VANDERBILT U MED CTR		Non_Elite	female	55	NASHVILLE	TN	Independent Hospitals	372320011	UNITED STATES	N	42917	43159	398	Other Research-Related	2017	102298	NCI	102298	coastal
NICHD	9224879	42913	PA-16-077	1K99HD090292-01	1	K99	HD	90292	1		MUKHOPADHYAY, MAHUA	42917	43312	Developmental Biology Study Section[CHHD-C]	12338325	52	CHEMISTRY	804355790	UYTTZT6G9DT1	804355790	UYTTZT6G9DT1	US	32.876991	-117.24087	577507	U OF CALIFORNIA SAN DIEGO		Elite	female	97	LA JOLLA	CA	SCHOOLS OF ARTS AND SCIENCES	920930621	UNITED STATES	N	42917	43312	865	Other Research-Related	2017	130334	NICHD	130334	coastal
NCI	9312262	42916	PA-15-083	5K99CA207871-02	5	K99	CA	207871	2		RADAEV, SERGEY	42557	43434	Transition to Independence Study Section (I)[NCI-I]	12315149	12	Unavailable	64931884	KUKXRCZ6NZC2	64931884	KUKXRCZ6NZC2	US	40.764045	-73.956024	5079202	SLOAN KETTERING INST CAN RES		Non_Elite	female	96	NEW YORK	NY	Research Institutes	100656007	UNITED STATES	N	42917	43434	398	Other Research-Related	2017	134904	NCI	134904	#N/A
NCI	9370608	42916	PA-16-193	1K99CA218681-01	1	K99	CA	218681	1		RADAEV, SERGEY	42948	43312	Transition to Independence Study Section (I)[NCI-I]	14491783	5	PUBLIC HEALTH & PREV MEDICINE	65391526	JJG6HU8PA4S5	65391526	JJG6HU8PA4S5	US	38.050527	-78.500531	1526402	U OF VIRGINIA		Non_Elite	female	97	CHARLOTTESVILLE	VA	SCHOOLS OF MEDICINE	229044195	UNITED STATES	N	42948	43312	398	Other Research-Related	2017	94684	NCI	94684	coastal
NCI	9307760	42920	PA-15-083	5K99CA204725-02	5	K99	CA	204725	2		RADAEV, SERGEY	42583	43434	Transition to Independence Study Section (I)[NCI-I]	8470670	3	Unavailable	65968786	GV31TMFLPY88	65968786	GV31TMFLPY88	US	40.86755	-73.473456	4577101	COLD SPRING HARBOR lab		Non_Elite	female	98	COLD SPRING HARBOR	NY	Research Institutes	117242209	UNITED STATES	N	42948	43434	398	Other Research-Related	2017	128235	NCI	128235	#N/A
NICHD	9327019	42930	PA-15-083	5K99HD086255-02	5	K99	HD	86255	2		ALVAREZ, RUBEN P	42587	42978	Biobehavioral and Behavioral Sciences Study Section[CHHD-1-H]	11641522	13	Unavailable	167204994	TYVNMW8FNQQ3	167204994	TYVNMW8FNQQ3	US	40.843076	-73.944206	1590919	NEW_YORK_STATE_PSY		Non_Elite	female	98	NEW YORK	NY	Independent Hospitals	100321007	UNITED STATES	N	42948	42978	865	Other Research-Related	2017	28988	NICHD	28988	#N/A
NIDA	9312260	42930	PA-15-083	5K99DA042127-02	5	K99	DA	42127	2		CRUMP, ARIA	42583	43069	ZDA1-SXM-M(04)S	12157469	13	PUBLIC HEALTH & PREV MEDICINE	124726725	GS3YEVSS12N6	124726725	GS3YEVSS12N6	US	37.870017	-122.268624	577502	U OF CALIFORNIA BERKELEY		Elite	female	65	BERKELEY	CA	SCHOOLS OF PUBLIC HEALTH	947101749	UNITED STATES	N	42948	43069	279	Other Research-Related	2017	153238	NIDA	153238	#N/A
NIEHS	9320953	42931	PA-15-083	5K99ES027028-02	5	K99	ES	27028	2		HEACOCK, MICHELLE	42583	43496	ZES1-LWJ-J(K)2	12280245	18	PUBLIC HEALTH & PREV MEDICINE	4514360	MKAGLD59JRL1	4514360	MKAGLD59JRL1	US	40.440909	-79.959125	2059802	U OF PITTSBURGH AT PITTSBURGH		Elite	female	97	PITTSBURGH	PA	SCHOOLS OF PUBLIC HEALTH	152133320	UNITED STATES	N	42948	43496	113	Other Research-Related	2017	89110	NIEHS	89110	coastal
NIMH	9325066	42931	PA-15-083	5K99MH108700-02	5	K99	MH	108700	2		SARAMPOTE, CHRISTOPHER S	42584	43465	ZMH1-ERB-M(04)S	11906363	4	INTERNAL MEDICINE/MEDICINE	608195277	D3LHU66KBLD5	608195277	D3LHU66KBLD5	US	35.9316	-79.057377	578206	U OF NORTH CAROLINA CHAPEL HILL		Elite	female	99	CHAPEL HILL	NC	SCHOOLS OF MEDICINE	275995023	UNITED STATES	N	42948	43465	242	Other Research-Related	2017	85824	NIMH	85824	coastal
NIAAA	9385558	42934	PA-16-193	1K99AA025384-01A1	1	K99	AA	25384	1	A	EGLI, MARK	42948	43251	Neuroscience and Behavior Study Section[AA-4]	9481206	7	PSYCHOLOGY	1910777	FTMTDMBR29C7	1910777	FTMTDMBR29C7	US	39.325256	-76.605131	4134401	JOHNS HOPKINS U		Elite	female	71	BALTIMORE	MD	SCHOOLS OF ARTS AND SCIENCES	212182680	UNITED STATES	N	42948	43251	273	Other Research-Related	2017	138752	NIAAA	138752	coastal
NCI	9330827	42935	PA-15-083	5K99CA207866-02	5	K99	CA	207866	2		SCHMIDT, MICHAEL K	42597	43100	Transition to Independence Study Section (I)[NCI-I]	14265156	7	MISCELLANEOUS	1425594	E2NYLCDML6V1	1425594	E2NYLCDML6V1	US	42.359128	-71.093339	4911501	MASSACHUSETTS INST OF TECHNOLOGY		Elite	female	99	CAMBRIDGE	MA	ORGANIZED RESEARCH UNITS	21421029	UNITED STATES	N	42948	43100	398	Other Research-Related	2017	124569	NCI	124569	coastal
NIAAA	9327848	42936	PA-15-083	5K99AA024499-02	5	K99	AA	24499	2		CUI, CHANGHAI	42592	43093	Neuroscience and Behavior Study Section[AA-4]	10436551	1	NEUROSCIENCES	183710748	NHV3GTWSALA7	183710748	NHV3GTWSALA7	US	32.786754	-79.947265	7575301	MED U OF SOUTH CAROLINA	157	Non_Elite	female	98	CHARLESTON	SC	SCHOOLS OF MEDICINE	294074636	UNITED STATES	N	42948	43093	273	Other Research-Related	2017	123063	NIAAA	123063	coastal
NHLBI	9332419	42936	PA-15-083	5K99HL132882-02	5	K99	HL	132882	2		WANG, WAYNE C	42597	43190	NHLBI Mentored Transition to Independence Study Section[MTI(MA)]	11768776	2	INTERNAL MEDICINE/MEDICINE	57123192	QD4MGHFDJKU1	57123192	QD4MGHFDJKU1	US	39.980272	-75.157051	8240301	TEMPLE U OF THE COMMONWEALTH	2192	Non_Elite	female	98	PHILADELPHIA	PA	SCHOOLS OF MEDICINE	191226003	UNITED STATES	N	42948	43190	837	Other Research-Related	2017	114574	NHLBI	114574	#N/A
NIDCD	9302744	42940	PA-15-083	5K99DC015554-02	5	K99	DC	15554	2		COOPER, JUDITH	42583	43312	ZDC1-SRB-R(38)	12235516	7	NEUROLOGY	1910777	FTMTDMBR29C7	1910777	FTMTDMBR29C7	US	39.325256	-76.605131	4134401	JOHNS HOPKINS U		Elite	female	81	BALTIMORE	MD	SCHOOLS OF MEDICINE	212182680	UNITED STATES	N	42948	43312	173	Other Research-Related	2017	87106	NIDCD	87106	coastal
NHLBI	9321061	42941	PA-15-083	5K99HL130339-02	5	K99	HL	130339	2		MARIC-BILKAN, CHRISTINE	42583	42978	NHLBI Mentored Transition to Independence Study Section[MTI(MA)]	11422183	1	Unavailable	6471700	Y2K4F9RPRRG7	6471700	Y2K4F9RPRRG7	US	44.02432	-92.46011	4976101	MAYO CLINIC ROCHESTER		Non_Elite	female	98	ROCHESTER	MN	Other Domestic Non-Profits	559050001	UNITED STATES	N	42948	42978	837	Other Research-Related	2017	11997	NHLBI	11997	coastal
NIDA	9310377	42942	PA-15-083	5K99DA042111-02	5	K99	DA	42111	2		LIN, YU	42583	43039	ZDA1-SXM-M(04)S	10577308	13	NEUROSCIENCES	78861598	C8H9CNG1VBD9	78861598	C8H9CNG1VBD9	US	40.790284	-73.946781	3839801	ICAHN SCH OF MED AT MOUNT SINAI		Non_Elite	female	96	NEW YORK	NY	SCHOOLS OF MEDICINE	100296574	UNITED STATES	N	42948	43039	279	Other Research-Related	2017	150880	NIDA	150880	coastal
NIMH	9371822	42942	PA-16-193	1K99MH113823-01	1	K99	MH	113823	1		VAN'T VEER, ASHLEE V	42948	43312	ZMH1-ERB-X(04)	12151322	33	NEUROLOGY	92530369	RN64EPNH8JC6	92530369	RN64EPNH8JC6	US	34.070199	-118.45102	577505	U OF CALIFORNIA LOS ANGELES		Elite	female	98	LOS ANGELES	CA	SCHOOLS OF MEDICINE	900952000	UNITED STATES	N	42948	43312	242	Other Research-Related	2017	114750	NIMH	114750	coastal
NCI	9352797	42943	PA-16-077	5K99CA212204-02	5	K99	CA	212204	2		SCHMIDT, MICHAEL K	42627	43343	Transition to Independence Study Section (I)[NCI-I]	14348852	18	PHARMACOLOGY	9214214	HJD6G4D6TJY5	9214214	HJD6G4D6TJY5	US	37.426852	-122.17047	8046501	STANFORD U		Elite	female	98	STANFORD	CA	SCHOOLS OF MEDICINE	943052004	UNITED STATES	N	42979	43343	398	Other Research-Related	2017	101536	NCI	101536	coastal
NCI	9353345	42944	PA-16-077	5K99CA201618-02	5	K99	CA	201618	2		SCHMIDT, MICHAEL K	42628	43708	Transition to Independence Study Section (I)[NCI-I]	11722480	7	Unavailable	76580745	DPMGH9MG1X67	76580745	DPMGH9MG1X67	US	42.337593	-71.108279	1464901	DANA FARBER CANCER INST		Elite	female	99	BOSTON	MA	Independent Hospitals	22155450	UNITED STATES	N	42979	43708	398	Other Research-Related	2017	128690	NCI	128690	coastal
NIAMS	9385849	42944	PA-16-193	1K99AR070902-01A1	1	K99	AR	70902	1	A	ZHENG, XINCHENG	42917	43281	Arthritis and Musculoskeletal and Skin Diseases Special Grants Study Section[AMS]	14141260	12	RADIATION-DIAGNOSTIC/ONCOLOGY	94878337	KMH5K9V7S518	94878337	KMH5K9V7S518	US	37.767442	-122.413937	577508	U OF CALIFORNIA SAN FRANCISCO		Elite	female	99	SAN FRANCISCO	CA	SCHOOLS OF MEDICINE	941432510	UNITED STATES	N	42917	43281	846	Other Research-Related	2017	94041	NIAMS	94041	coastal
NCI	9342733	42947	PA-15-083	5K99CA208017-02	5	K99	CA	208017	2		RADAEV, SERGEY	42618	43251	Transition to Independence Study Section (I)[NCI-I]	14251601	3	INTERNAL MEDICINE/MEDICINE	832127323	DLWBSLWAJWR1	832127323	DLWBSLWAJWR1	US	39.999598	-83.033131	6218701	OHIO STATE U		Non_Elite	female	99	COLUMBUS	OH	SCHOOLS OF MEDICINE	432101016	UNITED STATES	N	42979	43251	398	Other Research-Related	2017	103394	NCI	103394	#N/A
NCI	9353750	42954	PA-16-077	5K99CA212276-02	5	K99	CA	212276	2		SCHMIDT, MICHAEL K	42629	43708	Transition to Independence Study Section (I)[NCI-I]	11766138	12	INTERNAL MEDICINE/MEDICINE	60217502	YNT8TCJH8FQ8	60217502	YNT8TCJH8FQ8	US	40.7607	-73.9603	1514803	WEILL MED COLL OF CORNELL U		Elite	female	99	NEW YORK	NY	SCHOOLS OF MEDICINE	100654805	UNITED STATES	N	42979	43708	398	Other Research-Related	2017	148904	NCI	148904	coastal
NCI	9353334	42954	PA-16-077	5K99CA212200-02	5	K99	CA	212200	2		SCHMIDT, MICHAEL K	42628	43281	Transition to Independence Study Section (I)[NCI-I]	11602666	7	Unavailable	71723621	C1CPANL3EWK4	71723621	C1CPANL3EWK4	US	42.33982	-71.10568	758101	BETH ISRAEL DEACONESS MED CTR		Elite	female	99	BOSTON	MA	Independent Hospitals	22155400	UNITED STATES	N	42979	43281	398	Other Research-Related	2017	102130	NCI	102130	coastal
NIDCR	9319247	42954	PA-15-083	5K99DE025917-02	5	K99	DE	25917	2		FRIEDEN, LESLIE A	42614	43343	NIDCR Special Grants Review Committee[DSR]	8698160	7	DENTISTRY	604483045	FBYMGMHW4X95	604483045	FBYMGMHW4X95	US	42.33639	-71.07097	894901	BOSTON U MED CAMPUS		Non_Elite	female	98	BOSTON	MA	SCHOOLS OF DENTISTRY/ORAL HYGN	21182340	UNITED STATES	N	42979	43343	121	Other Research-Related	2017	128010	NIDCR	128010	#N/A
NIMH	9352870	42955	PA-16-077	5K99MH109667-02	5	K99	MH	109667	2		CHAVEZ, MARK	42627	43100	ZMH1-ERB-M(05)	11176362	4	PSYCHIATRY	608195277	D3LHU66KBLD5	608195277	D3LHU66KBLD5	US	35.9316	-79.057377	578206	U OF NORTH CAROLINA CHAPEL HILL		Elite	female	64	CHAPEL HILL	NC	SCHOOLS OF MEDICINE	275995023	UNITED STATES	N	42979	43100	242	Other Research-Related	2017	81962	NIMH	81962	coastal
NIMH	9353876	42957	PA-16-077	5K99MH111836-02	5	K99	MH	111836	2		VAN'T VEER, ASHLEE V	42629	43358	ZMH1-ERB-M(05)	8781418	12	BIOLOGY	71037113	LHGDNJMZ64Y1	71037113	LHGDNJMZ64Y1	US	40.763746	-73.955386	7056601	ROCKEFELLER U		Non_Elite	female	98	NEW YORK	NY	GRADUATE SCHOOLS	100656399	UNITED STATES	N	42994	43358	242	Other Research-Related	2017	127062	NIMH	127062	coastal
NINDS	9304349	42961	PA-15-083	5K99NS097627-02	5	K99	NS	97627	2		JAKEMAN, LYN B	42614	43555	NST-2 Study Section [NST-2]	11619409	12	PHYSIOLOGY	94878337	KMH5K9V7S518	94878337	KMH5K9V7S518	US	37.767442	-122.413937	577508	U OF CALIFORNIA SAN FRANCISCO		Elite	female	99	SAN FRANCISCO	CA	SCHOOLS OF MEDICINE	941432510	UNITED STATES	N	42979	43555	853	Other Research-Related	2017	99270	NINDS	99270	coastal
NICHD	9331694	42961	PA-15-083	5K99HD086304-03	5	K99	HD	86304	3		RAITEN, DANIEL J	42594	43343	Obstetrics and Maternal-Fetal Biology Study Section[CHHD-1-B]	11495404	10	NUTRITION	170230239	V6AFQPN18437	170230239	V6AFQPN18437	US	30.291188	-97.737568	578403	U OF TEXAS AT AUSTIN		Non_Elite	female	99	AUSTIN	TX	SCHOOLS OF ARTS AND SCIENCES	787121139	UNITED STATES	N	42948	43343	865	Other Research-Related	2017	129876	NICHD	129876	coastal
NIMH	9353881	42962	PA-16-077	5K99MH111926-02	5	K99	MH	111926	2		VAN'T VEER, ASHLEE V	42629	43465	ZMH1-ERB-M(05)	12077214	12	NONE	2484665	NJ1YPQXQG7U5	2484665	NJ1YPQXQG7U5	US	40.345441	-74.655866	6661401	PRINCETON U		Elite	female	98	Princeton	NJ	ORGANIZED RESEARCH UNITS	85406000	UNITED STATES	N	42979	43465	242	Other Research-Related	2017	130140	NIMH	130140	coastal
NIDCR	9346052	42962	PA-16-077	5K99DE025913-02	5	K99	DE	25913	2		FRIEDEN, LESLIE A	42618	43343	NIDCR Special Grants Review Committee[DSR]	11588997	7	DENTISTRY	63690705	YND4PLMC9AN7	63690705	YND4PLMC9AN7	US	33.50591	-86.799772	1288803	U OF ALABAMA AT BIRMINGHAM		Non_Elite	female	98	BIRMINGHAM	AL	SCHOOLS OF DENTISTRY/ORAL HYGN	352940001	UNITED STATES	N	42979	43343	121	Other Research-Related	2017	128833	NIDCR	128833	#N/A
NCI	9355137	42963	PA-16-077	5K99CA212621-02	5	K99	CA	212621	2		SCHMIDT, MICHAEL K	42633	43251	Transition to Independence Study Section (I)[NCI-I]	14377696	7	Unavailable	30811269	QN6MS4VN7BD1	30811269	QN6MS4VN7BD1	US	42.336107	-71.107481	1080401	BRIGHAM AND WOMENS HOSP		Elite	female	98	BOSTON	MA	Independent Hospitals	21156110	UNITED STATES	N	42979	43251	398	Other Research-Related	2017	137124	NCI	137124	#N/A
NHGRI	9339718	42963	PA-15-083	5K99HG009154-02	5	K99	HG	9154	2		BOYER, JOY	42614	43355	Special Emphasis Panel[ZRG1-SEIR-R(01)Q]	12616808	13	Unavailable	167204994	TYVNMW8FNQQ3	167204994	TYVNMW8FNQQ3	US	40.843076	-73.944206	1590919	NEW_YORK_STATE_PSY		Non_Elite	female	97	NEW YORK	NY	Independent Hospitals	100321007	UNITED STATES	N	42917	43355	172	Other Research-Related	2017	157283	NHGRI	157283	#N/A
NEI	9358724	42964	PA-15-083	5K99EY026130-02	5	K99	EY	26130	2		AGARWAL, NEERAJ	42643	43708	ZEY1-VSN(02)	10791580	7	PSYCHOLOGY	1423631	HLTMVS2JZBS6	1423631	HLTMVS2JZBS6	US	42.340048	-71.088892	6116101	NORTHEASTERN U	1147	Non_Elite	female	97	BOSTON	MA	SCHOOLS OF ARTS AND SCIENCES	21155005	UNITED STATES	N	42979	43708	867	Other Research-Related	2017	94336	NEI	94336	coastal
NIAMS	9348581	42964	PA-15-083	5K99AR069094-02	5	K99	AR	69094	2		ZHENG, XINCHENG	42621	43524	Arthritis and Musculoskeletal and Skin Diseases Special Grants Study Section[AMS]	12408838	1	Unavailable	75710996	N876TLXYGCG4	75710996	N876TLXYGCG4	US	41.811681	-71.409371	6959701	RHODE ISLAND HOSP		Non_Elite	female	98	PROVIDENCE	RI	Independent Hospitals	29034923	UNITED STATES	N	42979	43524	846	Other Research-Related	2017	90990	NIAMS	90990	#N/A
NIMH	9353870	42964	PA-16-077	5K99MH109674-02	5	K99	MH	109674	2		VAN'T VEER, ASHLEE V	42629	43281	ZMH1-ERB-M(05)	9172449	12	PSYCHIATRY	121911077	M5SZJ6VHUHN8	121911077	M5SZJ6VHUHN8	US	40.669895	-73.974354	5998304	NEW YORK U SCH OF MED		Elite	female	96	NEW YORK	NY	SCHOOLS OF MEDICINE	10016	UNITED STATES	N	42979	43281	242	Other Research-Related	2017	102740	NIMH	102740	coastal
NIDDK	9349495	42964	PA-16-077	5K99DK111916-02	5	K99	DK	111916	2		HAFT, CAROL R	42621	43100	Diabetes, Endocrinology and Metabolic Diseases B Study Section[DDK-B]	11803899	7	Unavailable	76580745	DPMGH9MG1X67	76580745	DPMGH9MG1X67	US	42.337593	-71.108279	1464901	DANA FARBER CANCER INST		Elite	female	98	BOSTON	MA	Independent Hospitals	22155450	UNITED STATES	N	42979	43100	847	Other Research-Related	2017	90000	NIDDK	90000	coastal
NHLBI	9343039	42964	PA-15-083	5K99HL130574-02	5	K99	HL	130574	2		WANG, WAYNE C	42614	43281	NHLBI Mentored Transition to Independence Study Section[MTI(OA)]	11388495	13	INTERNAL MEDICINE/MEDICINE	621889815	QHF5ZZ114M72	621889815	QHF5ZZ114M72	US	40.8415	-73.9414	1833205	COLUMBIA U HEALTH SCI		Elite	female	67	NEW YORK	NY	SCHOOLS OF MEDICINE	100323725	UNITED STATES	N	42917	43281	837	Other Research-Related	2017	166212	NHLBI	166212	#N/A
NCI	9323360	42968	PA-15-083	5K99CA201592-02	5	K99	CA	201592	2		SCHMIDT, MICHAEL K	42614	43222	Transition to Independence Study Section (I)[NCI-I]	12519318	7	Unavailable	76580745	DPMGH9MG1X67	76580745	DPMGH9MG1X67	US	42.337593	-71.108279	1464901	DANA FARBER CANCER INST		Elite	female	100	BOSTON	MA	Independent Hospitals	22155450	UNITED STATES	N	42979	43222	398	Other Research-Related	2017	151039	NCI	151039	#N/A
NEI	9371101	42971	PA-16-193	1K99EY028222-01	1	K99	EY	28222	1		AGARWAL, NEERAJ	42979	43343	ZEY1-VSN(03)	9468673	8	Unavailable	73825945	NA7AKMLK2BM1	73825945	NA7AKMLK2BM1	US	42.36275	-71.07009	4905801	MASSACHUSETTS EYE AND EAR INFIRMARY		Non_Elite	female	72	BOSTON	MA	Independent Hospitals	21143002	UNITED STATES	N	42979	43343	867	Other Research-Related	2017	94927	NEI	94927	coastal
NIGMS	9335930	42976	PA-15-083	5K99GM120494-02	5	K99	GM	120494	2		FLICKER, PAULA F	42614	43100	ZGM1-TWD-A(KR)	11368292	27	NONE	9584210	U2JMKHNS5TG4	9584210	U2JMKHNS5TG4	US	34.134332	-118.12652	1073501	CALIFORNIA INST OF TECHNOLOGY		Elite	female	98	PASADENA	CA	SCHOOLS OF ARTS AND SCIENCES	911250001	UNITED STATES	N	42979	43100	859	Other Research-Related	2017	29074	NIGMS	29074	#N/A
NEI	9360137	42977	PA-15-083	5K99EY026994-02	5	K99	EY	26994	2		AGARWAL, NEERAJ	42643	43343	ZEY1-VSN(05)	10090230	12	Unavailable	73121105	VT22KLLMNQL6	73121105	VT22KLLMNQL6	US	37.791185	-122.43391	1842901	SMITH KETTLEWELL EYE RES INST		Non_Elite	female	95	SAN FRANCISCO	CA	Research Institutes	941151813	UNITED STATES	N	42979	43343	867	Other Research-Related	2017	93085	NEI	93085	coastal
NIGMS	9355654	42977	PA-15-083	5K99GM120511-02	5	K99	GM	120511	2		FLICKER, PAULA F	42636	43343	ZGM1-TWD-A(KR)	11374347	12	NONE	73133571	GNJ7BBP73WE9	73133571	GNJ7BBP73WE9	US	42.275494	-83.743038	1506502	U OF MICHIGAN AT ANN ARBOR		Elite	female	99	ANN ARBOR	MI	ORGANIZED RESEARCH UNITS	481091276	UNITED STATES	N	42979	43343	859	Other Research-Related	2017	89100	NIGMS	89100	#N/A
NIGMS	9333390	42978	PA-15-083	5K99GM118885-02	5	K99	GM	118885	2		BARSKI, OLEG	42614	43281	ZGM1-TWD-A(KR)	12682493	12	PHYSIOLOGY	966668691	N4WWJC8T2593	809593387; 966668691	JJJNQAJY5RN6; N4WWJC8T2593	US	33.470962	-81.991405	676605	AUGUSTA U		Non_Elite	female	99	AUGUSTA	GA	SCHOOLS OF MEDICINE	309120004	UNITED STATES	N	42979	43281	859	Other Research-Related	2017	80881	NIGMS	80881	coastal
NIGMS	9353434	42979	PA-15-083	5K99GM120457-02	5	K99	GM	120457	2		FLICKER, PAULA F	42629	43343	ZGM1-TWD-A(KR)	12184840	12	CHEMISTRY	73133571	GNJ7BBP73WE9	73133571	GNJ7BBP73WE9	US	42.275494	-83.743038	1506502	U OF MICHIGAN AT ANN ARBOR		Elite	female	97	ANN ARBOR	MI	SCHOOLS OF ARTS AND SCIENCES	481091276	UNITED STATES	N	42979	43343	859	Other Research-Related	2017	90000	NIGMS	90000	#N/A
NIDDK	9349486	42982	PA-15-083	5K99DK110534-02	5	K99	DK	110534	2		SASLOWSKY, DAVID E	42621	43069	Digestive Diseases and Nutrition C Study Section[DDK-C]	11298051	27	NONE	9584210	U2JMKHNS5TG4	9584210	U2JMKHNS5TG4	US	34.134332	-118.12652	1073501	CALIFORNIA INST OF TECHNOLOGY		Elite	female	100	PASADENA	CA	SCHOOLS OF ARTS AND SCIENCES	911250001	UNITED STATES	N	42979	43069	847	Other Research-Related	2017	87158	NIDDK	87158	coastal
NIEHS	9386450	42991	PA-16-193	1K99ES027508-01A1	1	K99	ES	27508	1	A	JOUBERT, BONNIE	42993	43343	ZES1-JAB-D(C)	10575122	13	PEDIATRICS	78861598	C8H9CNG1VBD9	78861598	C8H9CNG1VBD9	US	40.790284	-73.946781	3839801	ICAHN SCH OF MED AT MOUNT SINAI		Non_Elite	female	93	NEW YORK	NY	SCHOOLS OF MEDICINE	100296574	UNITED STATES	N	42993	43343	113	Other Research-Related	2017	104144	NIEHS	104144	coastal
NIMH	9431595	42996	PA-16-193	1K99MH115165-01	1	K99	MH	115165	1		VAN'T VEER, ASHLEE V	42996	43343	ZMH1-ERB-X(06)	10996019	4	PSYCHIATRY	608195277	D3LHU66KBLD5	608195277	D3LHU66KBLD5	US	35.9316	-79.057377	578206	U OF NORTH CAROLINA CHAPEL HILL		Elite	female	98	CHAPEL HILL	NC	SCHOOLS OF MEDICINE	275995023	UNITED STATES	N	42996	43343	242	Other Research-Related	2017	100216	NIMH	100216	#N/A
NHGRI	9405590	43070	PA-16-077	5K99HG009007-02	5	K99	HG	9007	2		PILLAI, AJAY	42727	43131	Genome Research Study Section[GNOM-G]	10638120	7	Unavailable	76580745	DPMGH9MG1X67	76580745	DPMGH9MG1X67	US	42.337593	-71.108279	1464901	DANA FARBER CANCER INST		Elite	female	98	BOSTON	MA	Independent Hospitals	22155450	UNITED STATES	N	43070	43131	172	Other Research-Related	2018	25736	NHGRI	25736	coastal
NICHD	9411751	43087	PA-16-077	5K99HD087523-02	5	K99	HD	87523	2		RAITEN, DANIEL J	42745	43312	Pediatrics Study Section[CHHD-A]	12387223	13	PUBLIC HEALTH & PREV MEDICINE	78861598	C8H9CNG1VBD9	78861598	C8H9CNG1VBD9	US	40.790284	-73.946781	3839801	ICAHN SCH OF MED AT MOUNT SINAI		Non_Elite	female	98	NEW YORK	NY	SCHOOLS OF MEDICINE	100296574	UNITED STATES	N	43101	43312	865	Other Research-Related	2018	85278	NICHD	85278	coastal
NHLBI	9452503	43091	PA-16-193	1K99HL136924-01A1	1	K99	HL	136924	1	A	HAILU, BENYAM	43101	43465	NHLBI Mentored Transition to Independence Study Section[MTI(OA)]	10361630	7	Unavailable	30811269	QN6MS4VN7BD1	30811269	QN6MS4VN7BD1	US	42.336107	-71.107481	1080401	BRIGHAM AND WOMENS HOSP		Elite	female	88	BOSTON	MA	Independent Hospitals	21156110	UNITED STATES	N	43101	43465	839	Other Research-Related	2018	135540	NHLBI	135540	#N/A
NCI	9439779	43119	PA-16-193	5K99CA215256-02	5	K99	CA	215256	2		SCHMIDT, MICHAEL K	42795	43651	Transition to Independence Study Section (I)[NCI-I]	12597628	18	INTERNAL MEDICINE/MEDICINE	9214214	HJD6G4D6TJY5	9214214	HJD6G4D6TJY5	US	37.426852	-122.17047	8046501	STANFORD U		Elite	female	99	STANFORD	CA	SCHOOLS OF MEDICINE	943052004	UNITED STATES	N	43160	43651	398	Other Research-Related	2018	166644	NCI	166644	coastal
NCI	9440401	43132	PA-16-193	5K99CA215315-02	5	K99	CA	215315	2		SCHMIDT, MICHAEL K	42795	43312	Transition to Independence Study Section (I)[NCI-I]	12309568	3	INTERNAL MEDICINE/MEDICINE	43207562	FL6GV84CKN57	43207562	FL6GV84CKN57	US	41.310925	-72.926428	9420201	YALE U		Elite	female	98	NEW HAVEN	CT	SCHOOLS OF MEDICINE	65208327	UNITED STATES	N	43160	43312	398	Other Research-Related	2018	148502	NCI	148502	#N/A
NIEHS	9439806	43139	PA-16-077	5K99ES026198-02	5	K99	ES	26198	2		BOYLES, ABEE	42795	43510	ZES1-LWJ-J(KS)	10926177	12	PUBLIC HEALTH & PREV MEDICINE	73133571	GNJ7BBP73WE9	73133571	GNJ7BBP73WE9	US	42.275494	-83.743038	1506502	U OF MICHIGAN AT ANN ARBOR		Elite	female	99	ANN ARBOR	MI	SCHOOLS OF PUBLIC HEALTH	481091276	UNITED STATES	N	43160	43510	113	Other Research-Related	2018	108136	NIEHS	108136	#N/A
NEI	9438540	43147	PA-16-077	5K99EY027460-02	5	K99	EY	27460	2		AGARWAL, NEERAJ	42795	43372	ZEY1-VSN(04)	12247748	32	Unavailable	127069466	X4J4WHWY1KH1	127069466	X4J4WHWY1KH1	US	32.676861	-96.731446	1722801	RETINA FOUNDATION OF THE SOUTHWEST		Non_Elite	female	97	DALLAS	TX	Other Domestic Non-Profits	752315082	UNITED STATES	N	43160	43372	867	Other Research-Related	2018	93530	NEI	93530	coastal
NIMH	9415411	43147	PA-16-077	5K99MH111748-02	5	K99	MH	111748	2		VAN'T VEER, ASHLEE V	42758	43465	ZMH1-ERB-M(05)	11993722	8	Unavailable	73130411	FLJ7DQKLL226	73130411	FLJ7DQKLL226	US	42.363198	-71.068772	4907701	MASSACHUSETTS GENERAL HOSP		Elite	female	98	BOSTON	MA	Independent Hospitals	21142621	UNITED STATES	N	43147	43465	242	Other Research-Related	2018	131760	NIMH	131760	coastal
NCI	9430861	43150	PA-16-193	1K99CA222617-01	1	K99	CA	222617	1		SCHMIDT, MICHAEL K	43160	43524	Transition to Independence Study Section (I)[NCI-I]	12258296	7	Unavailable	76580745	DPMGH9MG1X67	76580745	DPMGH9MG1X67	US	42.337593	-71.108279	1464901	DANA FARBER CANCER INST		Elite	female	58	BOSTON	MA	Independent Hospitals	22155450	UNITED STATES	N	43160	43524	398	Other Research-Related	2018	114481	NCI	114481	#N/A
NIA	9444494	43154	PA-16-077	5K99AG051766-03	5	K99	AG	51766	3		ROMASHKAN, SERGEI	42809	43855	Basic Neuroscience of Aging Study Section[NIA-N]	11531889	7	PSYCHIATRY	47006379	JDLVAVGYJQ21	47006379	JDLVAVGYJQ21	US	42.335672	-71.104237	3212902	HARVARD MED SCH		Elite	female	99	BOSTON	MA	SCHOOLS OF MEDICINE	21201616	UNITED STATES	N	43160	43855	866	Other Research-Related	2018	127926	NIA	127926	coastal
NIEHS	9454478	43158	PA-16-077	5K99ES026648-02	5	K99	ES	26648	2		BOYLES, ABEE	42826	43465	ZES1-LWJ-J(KS)	10854492	7	NUTRITION	149617367	UNVDZNFA8R29	149617367	UNVDZNFA8R29	US	42.335306	-71.102775	3212904	HARVARD SCH OF PUBLIC HEALTH		Elite	female	97	BOSTON	MA	SCHOOLS OF PUBLIC HEALTH	21156028	UNITED STATES	N	43191	43465	113	Other Research-Related	2018	122769	NIEHS	122769	#N/A
NICHD	9453004	43176	PA-16-193	5K99HD091381-02	5	K99	HD	91381	2		WINER, KAREN	42826	43737	Reproduction, Andrology, and Gynecology Study Section[CHHD-R]	11034806	7	Unavailable	30811269	QN6MS4VN7BD1	30811269	QN6MS4VN7BD1	US	42.336107	-71.107481	1080401	BRIGHAM AND WOMENS HOSP		Elite	female	97	BOSTON	MA	Independent Hospitals	21156110	UNITED STATES	N	43191	43737	865	Other Research-Related	2018	136350	NICHD	136350	#N/A
NIA	9459824	43178	PA-16-193	5K99AG055684-02	5	K99	AG	55684	2		PLUDE, DANA JEFFREY	42826	43692	Behavior and Social Science of Aging Study Section[NIA-S]	12390632	13	NEUROLOGY	621889815	QHF5ZZ114M72	621889815	QHF5ZZ114M72	US	40.8415	-73.9414	1833205	COLUMBIA U HEALTH SCI		Elite	female	74	NEW YORK	NY	SCHOOLS OF MEDICINE	100323725	UNITED STATES	N	43191	43692	866	Other Research-Related	2018	129950	NIA	129950	coastal
NHLBI	9463522	43178	PA-16-193	5K99HL136870-02	5	K99	HL	136870	2		CHANG, HENRY	42826	43343	NHLBI Mentored Transition to Independence Study Section[MTI(JA)]	12007244	14	Unavailable	79783367	LZYFSK879778	79783367	LZYFSK879778	US	40.88083	-73.879943	10039582	ALBERT EINSTEIN COLL OF MED		Non_Elite	female	100	BRONX	NY	Other Domestic Non-Profits	104611975	UNITED STATES	N	43191	43343	839	Other Research-Related	2018	172260	NHLBI	172260	coastal
NIA	9471308	43178	PA-16-193	5K99AG055699-02	5	K99	AG	55699	2		KARRAKER, AMELIA WILKES	42840	43708	Behavior and Social Science of Aging Study Section[NIA-S]	12019663	37	NONE	72933393	G88KLJR3KYT5	72933393	G88KLJR3KYT5	US	34.017282	-118.281254	7636101	U OF SOUTHERN CALIFORNIA		Non_Elite	female	98	Los Angeles	CA	UNIVERSITY-WIDE	900894304	UNITED STATES	N	43191	43708	866	Other Research-Related	2018	89535	NIA	89535	coastal
NHLBI	9460287	43182	PA-16-193	5K99HL133414-02	5	K99	HL	133414	2		GALIS, ZORINA S	42826	43555	NHLBI Mentored Transition to Independence Study Section[MTI(JA)]	11623409	12	MISCELLANEOUS	3403953	NPM2J7MSCF61	3403953	NPM2J7MSCF61	US	40.870717	-77.83415	1524202	PENNSYLVANIA STATE		Non_Elite	female	55	UNIVERSITY PARK	PA	SCH ALLIED HEALTH PROFESSIONS	168027000	UNITED STATES	N	43191	43555	837	Other Research-Related	2018	104682	NHLBI	104682	#N/A
NICHD	9472360	43192	PA-16-193	5K99HD088751-02	5	K99	HD	88751	2		BURES, REGINA M	42845	43646	Population Sciences Study Section[CHHD-W]	12648795	13	PUBLIC HEALTH & PREV MEDICINE	124726725	GS3YEVSS12N6	124726725	GS3YEVSS12N6	US	37.870017	-122.268624	577502	U OF CALIFORNIA BERKELEY		Elite	female	98	BERKELEY	CA	SCHOOLS OF PUBLIC HEALTH	947101749	UNITED STATES	N	43191	43646	865	Other Research-Related	2018	123903	NICHD	123903	coastal
NICHD	9464551	43192	PA-16-193	5K99HD088675-02	5	K99	HD	88675	2		TAYMANS, SUSAN	42829	43708	Developmental Biology Study Section[CHHD-C]	14198133	12	ANATOMY/CELL BIOLOGY	121911077	M5SZJ6VHUHN8	121911077	M5SZJ6VHUHN8	US	40.669895	-73.974354	5998304	NEW YORK U SCH OF MED		Elite	female	98	NEW YORK	NY	SCHOOLS OF MEDICINE	10016	UNITED STATES	N	43191	43708	865	Other Research-Related	2018	119335	NICHD	119335	coastal
NIMH	9449475	43201	PA-16-193	5K99MH110603-02	5	K99	MH	110603	2		DRISCOLL, JAMIE	42826	43646	ZMH1-ERB-M(01)	11691916	5	MICROBIOLOGY/IMMUN/VIROLOGY	82359691	LN53LCFJFL45	82359691	LN53LCFJFL45	US	42.369697	-71.11193	3212901	HARVARD U		Elite	female	100	CAMBRIDGE	MA	SCHOOLS OF ARTS AND SCIENCES	21385369	UNITED STATES	N	43191	43646	242	Other Research-Related	2018	122283	NIMH	122283	coastal
NHLBI	9418094	43203	PA-16-077	5K99HL135258-02	5	K99	HL	135258	2		KALANTARI, ROYA	42767	43861	NHLBI Mentored Transition to Independence Study Section[MTI(OA)]	11794105	18	PEDIATRICS	9214214	HJD6G4D6TJY5	9214214	HJD6G4D6TJY5	US	37.426852	-122.17047	8046501	STANFORD U		Elite	female	86	STANFORD	CA	SCHOOLS OF MEDICINE	943052004	UNITED STATES	N	43132	43861	838	Other Research-Related	2018	168048	NHLBI	168048	coastal
NIDA	9463769	43209	PA-16-077	5K99DA041467-02	5	K99	DA	41467	2		LIN, YU	42856	43585	ZDA1-SXM-M(01)S	11213358	1	ANESTHESIOLOGY	68552207	L6NFUM28LQM5	68552207	L6NFUM28LQM5	US	38.664368	-90.323797	9083901	WASHINGTON U		Non_Elite	female	99	SAINT LOUIS	MO	SCHOOLS OF MEDICINE	631304862	UNITED STATES	N	43221	43585	279	Other Research-Related	2018	137026	NIDA	137026	coastal
NIGMS	9476260	43214	PA-16-077	5K99GM121880-02	5	K99	GM	121880	2		FLICKER, PAULA F	42856	43524	ZGM1-TWD-A(KR)	14092314	13	MISCELLANEOUS	124726725	GS3YEVSS12N6	124726725	GS3YEVSS12N6	US	37.870017	-122.268624	577502	U OF CALIFORNIA BERKELEY		Elite	female	97	BERKELEY	CA	ORGANIZED RESEARCH UNITS	947101749	UNITED STATES	N	43221	43524	859	Other Research-Related	2018	86400	NIGMS	86400	coastal
NIDA	9469508	43214	PA-16-077	5K99DA041493-02	5	K99	DA	41493	2		LIN, YU	42856	43677	ZDA1-SXM-M(01)S	9766599	3	PSYCHIATRY	969663814	NNFQH1JAPEP3	969663814	NNFQH1JAPEP3	US	29.643443	-82.349637	513806	U OF FLORIDA		Non_Elite	female	99	GAINESVILLE	FL	SCHOOLS OF MEDICINE	326115500	UNITED STATES	N	43221	43677	279	Other Research-Related	2018	113025	NIDA	113025	coastal
NIEHS	9478188	43220	PA-16-193	5K99ES027853-02	5	K99	ES	27853	2		DZIERLENGA, ANIKA LIN	42856	43362	ZES1-LWJ-D(K)	10751153	37	PUBLIC HEALTH & PREV MEDICINE	72933393	G88KLJR3KYT5	72933393	G88KLJR3KYT5	US	34.017282	-118.281254	7636101	U OF SOUTHERN CALIFORNIA		Non_Elite	female	98	Los Angeles	CA	SCHOOLS OF MEDICINE	900894304	UNITED STATES	N	43221	43362	113	Other Research-Related	2018	100926	NIEHS	100926	coastal
NHLBI	9475294	43220	PA-16-193	5K99HL133590-02	5	K99	HL	133590	2		WELNIAK, LISBETH A	42856	43768	NHLBI Mentored Transition to Independence Study Section[MTI(JA)]	11861342	7	PHARMACOLOGY	98987217	W8XEAJDKMXH3	98987217	W8XEAJDKMXH3	US	41.871509	-87.667721	577703	U OF ILLINOIS AT CHICAGO		Non_Elite	female	89	Chicago	IL	SCHOOLS OF PHARMACY	606124305	UNITED STATES	N	43221	43768	839	Other Research-Related	2018	136982	NHLBI	136982	coastal
NIAID	9492709	43222	PA-16-077	5K99AI127243-02	5	K99	AI	127243	2		MALASPINA, ANGELA	42887	43616	Acquired Immunodeficiency Syndrome Research Study Section[AIDS]	14221155	12	GENETICS	71037113	LHGDNJMZ64Y1	71037113	LHGDNJMZ64Y1	US	40.763746	-73.955386	7056601	ROCKEFELLER U		Non_Elite	female	97	NEW YORK	NY	GRADUATE SCHOOLS	100656399	UNITED STATES	N	43252	43616	855	Other Research-Related	2018	142007	NIAID	142007	coastal
NHLBI	9476157	43229	PA-16-193	5K99HL136883-02	5	K99	HL	136883	2		WANG, WAYNE C	42856	43585	NHLBI Mentored Transition to Independence Study Section[MTI(JA)]	14432849	12	PATHOLOGY	94878337	KMH5K9V7S518	94878337	KMH5K9V7S518	US	37.767442	-122.413937	577508	U OF CALIFORNIA SAN FRANCISCO		Elite	female	56	SAN FRANCISCO	CA	SCHOOLS OF MEDICINE	941432510	UNITED STATES	N	43221	43585	837	Other Research-Related	2018	90697	NHLBI	90697	coastal
NHGRI	9526698	43236	PA-16-193	1K99HG009678-01A1	1	K99	HG	9678	1	A	SOFIA, HEIDI J	43236	43585	Genome Research Study Section[GNOM-G]	14477356	5	Unavailable	780007410	M3GAQBN4BWH6	780007410	M3GAQBN4BWH6	US	34.72523	-86.691036	10011070	HUDSON ALPHA INST FOR BIOTECHNOLOGY		Non_Elite	female	99	HUNTSVILLE	AL	Research Institutes	358062908	UNITED STATES	N	43236	43585	172	Other Research-Related	2018	112117	NHGRI	112117	coastal
NIDA	9525944	43236	PA-16-193	5K99DA044838-02	5	K99	DA	44838	2		LIN, YU	42931	43646	ZDA1-SXM-M(02)S	9132016	7	PUBLIC HEALTH & PREV MEDICINE	1910777	FTMTDMBR29C7	1910777	FTMTDMBR29C7	US	39.325256	-76.605131	4134401	JOHNS HOPKINS U		Elite	female	100	BALTIMORE	MD	SCHOOLS OF PUBLIC HEALTH	212182680	UNITED STATES	N	43282	43646	279	Other Research-Related	2018	137749	NIDA	137749	#N/A
NIAAA	9487825	43243	PA-15-083	7K99AA024215-02	7	K99	AA	24215	2		LIU, QI-YING	42887	43616	Neuroscience and Behavior Study Section[AA-4]	8715153	2	Unavailable	62761671	Z1H9VJS8NG16	62761671	Z1H9VJS8NG16	US	41.664405	-91.542152	3972901	U OF IOWA		Non_Elite	female	98	IOWA CITY	IA	Domestic Higher Education	522421320	UNITED STATES	N	43252	43616	273	Other Research-Related	2018	128592	NIAAA	128592	coastal
NIBIB	9491822	43250	PA-16-193	5K99EB023279-02	5	K99	EB	23279	2		KING, RANDY LEE	42887	43982	ZEB1-OSR-B(J2)S	11563047	18	RADIATION-DIAGNOSTIC/ONCOLOGY	9214214	HJD6G4D6TJY5	9214214	HJD6G4D6TJY5	US	37.426852	-122.17047	8046501	STANFORD U		Elite	female	99	STANFORD	CA	SCHOOLS OF MEDICINE	943052004	UNITED STATES	N	43252	43982	286	Other Research-Related	2018	76048	NIBIB	76048	coastal
NIA	9564808	43251	PA-16-193	5K99AG056635-02	5	K99	AG	56635	2		NIELSEN, LISBETH	42993	43708	Behavior and Social Science of Aging Study Section[NIA-S]	11895122	6	NONE	939017877	H1HYA8Z1NTM5	939017877	H1HYA8Z1NTM5	US	38.040959	-84.505885	2793601	U OF KENTUCKY		Non_Elite	female	99	LEXINGTON	KY	ORGANIZED RESEARCH UNITS	405260001	UNITED STATES	N	43252	43708	866	Other Research-Related	2018	109602	NIA	109602	coastal
NIAID	9512739	43255	PA-16-193	5K99AI128029-02	5	K99	AI	128029	2		LU, KRISTINA	42917	43799	Microbiology and Infectious Diseases B Research Study Section[MID-B]	9018789	7	MICROBIOLOGY/IMMUN/VIROLOGY	98987217	W8XEAJDKMXH3	98987217	W8XEAJDKMXH3	US	41.871509	-87.667721	577703	U OF ILLINOIS AT CHICAGO		Non_Elite	female	71	Chicago	IL	SCHOOLS OF MEDICINE	606124305	UNITED STATES	N	43282	43799	855	Other Research-Related	2018	125442	NIAID	125442	#N/A
NIA	9526985	43263	PA-16-193	5K99AG056596-02	5	K99	AG	56596	2		WAGSTER, MOLLY V	42931	43646	Basic Neuroscience of Aging Study Section[NIA-N]	10066433	45	OTHER BASIC SCIENCES	46705849	MJC5FCYQTPE6	46705849	MJC5FCYQTPE6	US	33.64852	-117.82136	577504	U OF CALIFORNIA IRVINE		Non_Elite	female	98	IRVINE	CA	GRADUATE SCHOOLS	926970001	UNITED STATES	N	43282	43646	866	Other Research-Related	2018	100640	NIA	100640	#N/A
NIEHS	9517056	43264	PA-16-193	5K99ES027022-02	5	K99	ES	27022	2		GRAY, KIMBERLY A	42917	43365	ZES1-LWJ-D(K)	9613432	13	PUBLIC HEALTH & PREV MEDICINE	78861598	C8H9CNG1VBD9	78861598	C8H9CNG1VBD9	US	40.790284	-73.946781	3839801	ICAHN SCH OF MED AT MOUNT SINAI		Non_Elite	female	97	NEW YORK	NY	SCHOOLS OF MEDICINE	100296574	UNITED STATES	N	43282	43365	113	Other Research-Related	2018	98444	NIEHS	98444	coastal
NIDA	9523166	43265	PA-16-193	5K99DA043629-02	5	K99	DA	43629	2		NAIR, SUNILA GOPI	42931	43677	ZDA1-SXM-M(03)S	11697289	8	Unavailable	73130411	FLJ7DQKLL226	73130411	FLJ7DQKLL226	US	42.363198	-71.068772	4907701	MASSACHUSETTS GENERAL HOSP		Elite	female	92	BOSTON	MA	Independent Hospitals	21142621	UNITED STATES	N	43282	43677	279	Other Research-Related	2018	186192	NIDA	186192	#N/A
NCI	9523112	43271	PA-16-077	5K99CA204601-02	5	K99	CA	204601	2		SCHMIDT, MICHAEL K	42948	43677	Transition to Independence Study Section (I)[NCI-I]	11404361	7	Unavailable	76580745	DPMGH9MG1X67	76580745	DPMGH9MG1X67	US	42.337593	-71.108279	1464901	DANA FARBER CANCER INST		Elite	female	98	BOSTON	MA	Independent Hospitals	22155450	UNITED STATES	N	43313	43677	398	Other Research-Related	2018	135541	NCI	135541	coastal
NICHD	9527854	43271	PA-16-193	5K99HD092894-02	5	K99	HD	92894	2		RAVINDRANATH, NEELAKANTA	42948	43677	Reproduction, Andrology, and Gynecology Study Section[CHHD-R]	11940827	52	OBSTETRICS & GYNECOLOGY	804355790	UYTTZT6G9DT1	804355790	UYTTZT6G9DT1	US	32.876991	-117.24087	577507	U OF CALIFORNIA SAN DIEGO		Elite	female	88	LA JOLLA	CA	SCHOOLS OF MEDICINE	920930621	UNITED STATES	N	43313	43677	865	Other Research-Related	2018	95193	NICHD	95193	coastal
NIMHD	9572414	43273	PA-16-193	5K99MD011485-02	5	K99	MD	11485	2		ROSARIO, ADELAIDA M	43003	43646	ZMD1-XLN(O1)	11824497	9	NONE	800772139	S3GMKS8ELA16	800772139	S3GMKS8ELA16	US	29.706319	-95.397195	578407	U OF TX MD ANDERSON CAN CTR		Non_Elite	female	84	HOUSTON	TX	OVERALL MEDICAL	770304009	UNITED STATES	N	43282	43646	307	Other Research-Related	2018	86776	NIMHD	86776	coastal
NIA	9519772	43273	PA-16-193	5K99AG056595-02	5	K99	AG	56595	2		KERR, CANDACE L	42917	43646	Biological Aging Study Section[NIA-B]	8738788	3	PHYSIOLOGY	47120084	TX2DAGQPENZ5	47120084	TX2DAGQPENZ5	US	38.543366	-121.72946	577503	U OF CALIFORNIA AT DAVIS		Non_Elite	female	98	DAVIS	CA	SCHOOLS OF MEDICINE	956186153	UNITED STATES	N	43282	43646	866	Other Research-Related	2018	104909	NIA	104909	coastal
NICHD	9527165	43277	PA-16-193	5K99HD091396-02	5	K99	HD	91396	2		ESPOSITO, LAYLA E	42928	43646	Pediatrics Study Section[CHHD-A]	14324834	9	PEDIATRICS	51113330	FXKMA43NTV21	51113330	FXKMA43NTV21	US	29.70926	-95.400851	481201	BAYLOR COLL OF MED		Non_Elite	female	95	HOUSTON	TX	SCHOOLS OF MEDICINE	770303411	UNITED STATES	N	43282	43646	865	Other Research-Related	2018	110334	NICHD	110334	#N/A
NIGMS	9520308	43277	PA-16-193	5K99GM124460-02	5	K99	GM	124460	2		ZUK, DORIT	42917	43465	ZGM1-TWD-B(KR)	11834761	2	GENETICS	603847393	MQE2JHHJW9Q8	603847393	MQE2JHHJW9Q8	US	42.2802	-71.758245	850903	U OF MASSACHUSETTS MED SCH WORCESTER		Non_Elite	female	56	WORCESTER	MA	SCHOOLS OF MEDICINE	16550002	UNITED STATES	N	43282	43465	859	Other Research-Related	2018	90000	NIGMS	90000	coastal
NIA	9529340	43281	PA-16-193	5K99AG056599-02	5	K99	AG	56599	2		KARRAKER, AMELIA WILKES	42931	43646	Behavior and Social Science of Aging Study Section[NIA-S]	12509798	12	BIOSTATISTICS & OTHER MATH SCI	73133571	GNJ7BBP73WE9	73133571	GNJ7BBP73WE9	US	42.275494	-83.743038	1506502	U OF MICHIGAN AT ANN ARBOR		Elite	female	97	ANN ARBOR	MI	ORGANIZED RESEARCH UNITS	481091276	UNITED STATES	N	43282	43646	866	Other Research-Related	2018	132300	NIA	132300	coastal
NIA	9536644	43290	PA-16-193	5K99AG056680-02	5	K99	AG	56680	2		MACKIEWICZ, MIROSLAW	42948	43373	Basic Neuroscience of Aging Study Section[NIA-N]	12672365	2	Unavailable	786502351	WMHWCFJNAJL3	786502351	WMHWCFJNAJL3	US	38.135302	-122.574863	3123401	BUCK INST FOR RES ON AGING		Non_Elite	female	73	NOVATO	CA	Research Institutes	949451400	UNITED STATES	N	43313	43373	866	Other Research-Related	2018	132057	NIA	132057	coastal
NIAMS	9534525	43290	PA-16-193	5K99AR071517-02	5	K99	AR	71517	2		WASHABAUGH, CHARLES H	42942	43646	Arthritis and Musculoskeletal and Skin Diseases Special Grants Study Section[AMS]	14179004	2	OTHER HEALTH PROFESSIONS	62761671	Z1H9VJS8NG16	62761671	Z1H9VJS8NG16	US	41.664405	-91.542152	3972901	U OF IOWA		Non_Elite	female	98	IOWA CITY	IA	SCHOOLS OF MEDICINE	522421320	UNITED STATES	N	43282	43646	846	Other Research-Related	2018	85819	NIAMS	85819	coastal
NINR	9566309	43290	PA-16-193	5K99NR016686-02	5	K99	NR	16686	2		KEHL, KAREN	42993	43677	Nursing Science Review Committee[NRRC(68)]	11839293	6	NONE	41096314	MW8JHK6ZYEX8	41096314	MW8JHK6ZYEX8	US	39.745098	-104.837605	1199905	U OF COLORADO DENVER		Non_Elite	female	99	Aurora	CO	SCHOOLS OF NURSING	800452570	UNITED STATES	N	43313	43677	361	Other Research-Related	2018	88395	NINR	88395	coastal
NIA	9526986	43290	PA-16-193	5K99AG055697-03	5	K99	AG	55697	3		WISE, BRADLEY C	42931	44012	Basic Neuroscience of Aging Study Section[NIA-N]	11764215	7	Unavailable	1425594	E2NYLCDML6V1	1425594	E2NYLCDML6V1	US	42.359128	-71.093339	4911501	MASSACHUSETTS INST OF TECHNOLOGY		Elite	female	99	CAMBRIDGE	MA	Domestic Higher Education	21421029	UNITED STATES	N	43296	44012	866	Other Research-Related	2018	115128	NIA	115128	coastal
NICHD	9532263	43292	PA-16-193	5K99HD090290-02	5	K99	HD	90290	2		ILEKIS, JOHN V	42948	43708	Obstetrics and Maternal-Fetal Biology Study Section[CHHD-B]	11877300	18	MICROBIOLOGY/IMMUN/VIROLOGY	9214214	HJD6G4D6TJY5	9214214	HJD6G4D6TJY5	US	37.426852	-122.17047	8046501	STANFORD U		Elite	female	97	STANFORD	CA	SCHOOLS OF MEDICINE	943052004	UNITED STATES	N	43313	43708	865	Other Research-Related	2018	101656	NICHD	101656	#N/A
NCI	9527566	43292	PA-16-193	1K99CA218875-01A1	1	K99	CA	218875	1	A	RADAEV, SERGEY	43292	43538	Transition to Independence Study Section (I)[NCI-I]	12529028	12	Unavailable	64931884	KUKXRCZ6NZC2	64931884	KUKXRCZ6NZC2	US	40.764045	-73.956024	5079202	SLOAN KETTERING INST CAN RES		Non_Elite	female	99	NEW YORK	NY	Research Institutes	100656007	UNITED STATES	N	43292	43538	398	Other Research-Related	2018	105629	NCI	105629	coastal
NCI	9582390	43293	PA-16-193	1K99CA229984-01	1	K99	CA	229984	1		RADAEV, SERGEY	43293	43555	Transition to Independence Study Section (I)[NCI-I]	14546459	7	Unavailable	76580745	DPMGH9MG1X67	76580745	DPMGH9MG1X67	US	42.337593	-71.108279	1464901	DANA FARBER CANCER INST		Elite	female	98	BOSTON	MA	Independent Hospitals	22155450	UNITED STATES	N	43293	43555	398	Other Research-Related	2018	128963	NCI	128963	#N/A
NIMH	9542389	43295	PA-16-193	5K99MH113821-02	5	K99	MH	113821	2		SARAMPOTE, CHRISTOPHER S	42956	43646	ZMH1-ERB-X(04)	12659393	10	PSYCHOLOGY	49179401	F4N1QNPB95M4	49179401	F4N1QNPB95M4	US	40.81207	-73.954377	1833202	COLUMBIA U NEW YORK MORNINGSIDE		Elite	female	99	NEW YORK	NY	GRADUATE SCHOOLS	100276900	UNITED STATES	N	43313	43646	242	Other Research-Related	2018	123309	NIMH	123309	coastal
NICHD	9572404	43297	PA-16-193	5K99HD093858-02	5	K99	HD	93858	2		HALVORSON, LISA M	43003	43677	Reproduction, Andrology, and Gynecology Study Section[CHHD-R]	14154181	18	ANESTHESIOLOGY	9214214	HJD6G4D6TJY5	9214214	HJD6G4D6TJY5	US	37.426852	-122.17047	8046501	STANFORD U		Elite	female	92	STANFORD	CA	SCHOOLS OF MEDICINE	943052004	UNITED STATES	N	43313	43677	865	Other Research-Related	2018	126306	NICHD	126306	coastal
NICHD	9568356	43299	PA-16-193	5K99HD091375-02	5	K99	HD	91375	2		CRUZ, THERESA	43000	43708	Function, Integration, and Rehabilitation Sciences Study Section[CHHD-K]	11298443	45	NEUROLOGY	46705849	MJC5FCYQTPE6	46705849	MJC5FCYQTPE6	US	33.64852	-117.82136	577504	U OF CALIFORNIA IRVINE		Non_Elite	female	98	IRVINE	CA	SCHOOLS OF MEDICINE	926970001	UNITED STATES	N	43344	43708	865	Other Research-Related	2018	98386	NICHD	98386	coastal
NIGMS	9517966	43300	PA-16-193	5K99GM123230-02	5	K99	GM	123230	2		FLICKER, PAULA F	42917	44012	ZGM1-TWD-B(KR)	11732043	7	Unavailable	120989983	C186U32QSBR9	120989983	C186U32QSBR9	US	42.363037	-71.08963	1742101	WHITEHEAD INST FOR BIOMED RES		Elite	female	83	CAMBRIDGE	MA	Research Institutes	21421025	UNITED STATES	N	43282	44012	859	Other Research-Related	2018	90000	NIGMS	90000	#N/A
NIDCR	9509400	43300	PA-16-193	5K99DE027218-02	5	K99	DE	27218	2		FRIEDEN, LESLIE A	42979	44074	NIDCR Special Grants Review Committee[DSR]	14540133	37	ORTHOPEDICS	72933393	G88KLJR3KYT5	72933393	G88KLJR3KYT5	US	34.017282	-118.281254	7636101	U OF SOUTHERN CALIFORNIA		Non_Elite	female	98	Los Angeles	CA	SCHOOLS OF MEDICINE	900894304	UNITED STATES	N	43344	44074	121	Other Research-Related	2018	159300	NIDCR	159300	coastal
NIA	9526973	43301	PA-16-077	5K99AG054616-02	5	K99	AG	54616	2		DIBATTISTA, AMANDA	42931	43646	Basic Neuroscience of Aging Study Section[NIA-N]	12223256	18	BIOPHYSICS	9214214	HJD6G4D6TJY5	9214214	HJD6G4D6TJY5	US	37.426852	-122.17047	8046501	STANFORD U		Elite	female	84	STANFORD	CA	SCHOOLS OF MEDICINE	943052004	UNITED STATES	N	43313	43646	866	Other Research-Related	2018	118681	NIA	118681	coastal
NIA	9543276	43304	PA-16-193	5K99AG056600-02	5	K99	AG	56600	2		YANG, AUSTIN JYAN-YU	42962	43830	Basic Neuroscience of Aging Study Section[NIA-N]	10878246	3	NEUROLOGY	16060860	YXJGGNC5J269	16060860	YXJGGNC5J269	US	39.026584	-94.636347	1484303	U OF KANSAS MED CTR		Non_Elite	female	99	KANSAS CITY	KS	SCHOOLS OF MEDICINE	661608500	UNITED STATES	N	43313	43830	866	Other Research-Related	2018	96899	NIA	96899	coastal
NICHD	9563302	43305	PA-16-193	5K99HD090229-02	5	K99	HD	90229	2		MIODOVNIK, MENACHEM	42989	44074	Pediatrics Study Section[CHHD-A]	11783013	3	PATHOLOGY	96997515	NPSNT86JKN51	96997515	NPSNT86JKN51	US	45.49882	-122.685647	6297007	OREGON HEALTH & SCI U		Non_Elite	female	98	PORTLAND	OR	SCHOOLS OF MEDICINE	972393098	UNITED STATES	N	43344	44074	865	Other Research-Related	2018	91870	NICHD	91870	coastal
NIA	9543940	43305	PA-16-193	5K99AG055649-02	5	K99	AG	55649	2		FRIDELL, YIH-WOEI	42962	43372	Biological Aging Study Section[NIA-B]	11655822	30	INTERNAL MEDICINE/MEDICINE	800771545	YZJ6DKPM4W63	800771545	YZJ6DKPM4W63	US	32.811963	-96.837534	578404	UT SOUTHWESTERN MED CTR		Non_Elite	female	98	DALLAS	TX	SCHOOLS OF MEDICINE	753909105	UNITED STATES	N	43313	43372	866	Other Research-Related	2018	107482	NIA	107482	coastal
NIA	9543943	43306	PA-16-193	5K99AG056598-02	5	K99	AG	56598	2		ONKEN, LISA	42962	43876	Basic Neuroscience of Aging Study Section[NIA-N]	14328994	12	PSYCHIATRY	94878337	KMH5K9V7S518	94878337	KMH5K9V7S518	US	37.767442	-122.413937	577508	U OF CALIFORNIA SAN FRANCISCO		Elite	female	56	SAN FRANCISCO	CA	SCHOOLS OF MEDICINE	941432510	UNITED STATES	N	43313	43876	866	Other Research-Related	2018	135662	NIA	135662	coastal
NIA	9531224	43306	PA-16-193	5K99AG054760-02	5	K99	AG	54760	2		MACCHIARINI, FRANCESCA	42948	43372	Biological Aging Study Section[NIA-B]	9016777	7	Unavailable	120989983	C186U32QSBR9	120989983	C186U32QSBR9	US	42.363037	-71.08963	1742101	WHITEHEAD INST FOR BIOMED RES		Elite	female	97	CAMBRIDGE	MA	Research Institutes	21421025	UNITED STATES	N	43313	43372	866	Other Research-Related	2018	112190	NIA	112190	coastal
NICHD	9536932	43306	PA-16-193	5K99HD092553-02	5	K99	HD	92553	2		MUKHOPADHYAY, MAHUA	42948	43708	Developmental Biology Study Section[CHHD-C]	14311573	6	NONE	1912864	M1LVPE5GLSD9	1912864	M1LVPE5GLSD9	US	40.481906	-74.457066	1196203	RUTGERS THE STATE U OF NJ		Non_Elite	female	88	PISCATAWAY	NJ	ORGANIZED RESEARCH UNITS	88543925	UNITED STATES	N	43313	43708	865	Other Research-Related	2018	109520	NICHD	109520	coastal
NIEHS	9546688	43308	PA-16-193	5K99ES027496-02	5	K99	ES	27496	2		BOYLES, ABEE	42979	43448	ZES1-JAB-D(C)	12336136	13	PUBLIC HEALTH & PREV MEDICINE	78861598	C8H9CNG1VBD9	78861598	C8H9CNG1VBD9	US	40.790284	-73.946781	3839801	ICAHN SCH OF MED AT MOUNT SINAI		Non_Elite	female	97	NEW YORK	NY	SCHOOLS OF MEDICINE	100296574	UNITED STATES	N	43344	43448	113	Other Research-Related	2018	103464	NIEHS	103464	coastal
NHLBI	9542363	43308	PA-16-193	5K99HL138268-02	5	K99	HL	138268	2		WANG, WAYNE C	42956	43677	NHLBI Mentored Transition to Independence Study Section[MTI(MA)]	12553572	2	INTERNAL MEDICINE/MEDICINE	57123192	QD4MGHFDJKU1	57123192	QD4MGHFDJKU1	US	39.980272	-75.157051	8240301	TEMPLE U OF THE COMMONWEALTH		Non_Elite	female	100	PHILADELPHIA	PA	SCHOOLS OF MEDICINE	191226003	UNITED STATES	N	43313	43677	837	Other Research-Related	2018	100523	NHLBI	100523	coastal
NHLBI	9545049	43309	PA-16-193	5K99HL133458-02	5	K99	HL	133458	2		YANG, YU-CHUNG	42979	43691	NHLBI Mentored Transition to Independence Study Section[MTI(MA)]	12671348	52	OTHER BASIC SCIENCES	804355790	UYTTZT6G9DT1	804355790	UYTTZT6G9DT1	US	32.876991	-117.24087	577507	U OF CALIFORNIA SAN DIEGO		Elite	female	98	LA JOLLA	CA	SCHOOLS OF MEDICINE	920930621	UNITED STATES	N	43344	43691	839	Other Research-Related	2018	146232	NHLBI	146232	#N/A
NIGMS	9534140	43311	PA-16-193	5K99GM124296-02	5	K99	GM	124296	2		BARSKI, OLEG	42948	43677	ZGM1-TWD-B(KR)	12336182	8	Unavailable	73130411	FLJ7DQKLL226	73130411	FLJ7DQKLL226	US	42.363198	-71.068772	4907701	MASSACHUSETTS GENERAL HOSP		Elite	female	95	BOSTON	MA	Independent Hospitals	21142621	UNITED STATES	N	43313	43677	859	Other Research-Related	2018	90000	NIGMS	90000	coastal
NIGMS	9527839	43311	PA-16-193	5K99GM124357-03	5	K99	GM	124357	3		JANES, DANIEL E	42948	43769	ZGM1-TWD-B(KR)	11904899	7	Unavailable	30811269	QN6MS4VN7BD1	30811269	QN6MS4VN7BD1	US	42.336107	-71.107481	1080401	BRIGHAM AND WOMENS HOSP		Elite	female	99	BOSTON	MA	Independent Hospitals	21156110	UNITED STATES	N	43313	43769	859	Other Research-Related	2018	90000	NIGMS	90000	coastal
NIMH	9548290	43312	PA-16-193	5K99MH112413-02	5	K99	MH	112413	2		GORDON, CHRISTOPHER M	42970	43496	ZMH1-ERB-X(05)	11877060	1	PUBLIC HEALTH & PREV MEDICINE	1785542	E3FDXZ6TBHW3	1785542	E3FDXZ6TBHW3	US	41.826136	-71.404513	1003201	BROWN U		Elite	female	98	PROVIDENCE	RI	SCHOOLS OF PUBLIC HEALTH	29034202	UNITED STATES	N	43313	43496	242	Other Research-Related	2018	91862	NIMH	91862	coastal
NICHD	9532261	43312	PA-16-193	5K99HD091376-02	5	K99	HD	91376	2		WINER, KAREN	42948	44043	Obstetrics and Maternal-Fetal Biology Study Section[CHHD-B]	11597894	7	PHARMACOLOGY	188435911	Z9CRZKD42ZT1	188435911	Z9CRZKD42ZT1	US	39.292248	-76.625629	820104	U OF MARYLAND BALTIMORE		Non_Elite	female	99	BALTIMORE	MD	SCHOOLS OF MEDICINE	212011508	UNITED STATES	N	43313	44043	865	Other Research-Related	2018	125334	NICHD	125334	coastal
NIMH	9553863	43312	PA-16-193	5K99MH115096-02	5	K99	MH	115096	2		VAN'T VEER, ASHLEE V	42979	43555	ZMH1-ERB-X(06)	11728650	13	NEUROSCIENCES	78861598	C8H9CNG1VBD9	78861598	C8H9CNG1VBD9	US	40.790284	-73.946781	3839801	ICAHN SCH OF MED AT MOUNT SINAI		Non_Elite	female	98	NEW YORK	NY	SCHOOLS OF MEDICINE	100296574	UNITED STATES	N	43344	43555	242	Other Research-Related	2018	71385	NIMH	71385	coastal
NIAAA	9535027	43313	PA-16-077	5K99AA025408-02	5	K99	AA	25408	2		LIU, QI-YING	42948	43861	ZAA1-JJ(01)M	11976480	49	Unavailable	781613492	PHZJFZ32NKH4	781613492	PHZJFZ32NKH4	US	32.903062	-117.243592	7375802	SCRIPPS RES INST THE		Non_Elite	female	97	LA JOLLA	CA	Other Domestic Non-Profits	920371000	UNITED STATES	N	43313	43861	273	Other Research-Related	2018	141750	NIAAA	141750	coastal
NCI	9581554	43313	PA-16-193	1K99CA229993-01	1	K99	CA	229993	1		SCHMIDT, MICHAEL K	43313	43646	Transition to Independence Study Section (I)[NCI-I]	14809328	12	Unavailable	64931884	KUKXRCZ6NZC2	64931884	KUKXRCZ6NZC2	US	40.764045	-73.956024	5079202	SLOAN KETTERING INST CAN RES		Non_Elite	female	69	NEW YORK	NY	Research Institutes	100656007	UNITED STATES	N	43313	43646	398	Other Research-Related	2018	140859	NCI	140859	coastal
NIA	9552033	43315	PA-16-193	5K99AG055717-02	5	K99	AG	55717	2		FULDNER, REBECCA A	42979	43890	Biological Aging Study Section[NIA-B]	14083359	5	PHYSICAL MEDICINE & REHAB	878648294	GY8NMUZQXVS7	878648294	GY8NMUZQXVS7	US	35.47459	-97.505034	1524003	U OF OKLAHOMA HLTH SCI CTR		Non_Elite	female	97	OKLAHOMA CITY	OK	SCH ALLIED HEALTH PROFESSIONS	731043609	UNITED STATES	N	43344	43890	866	Other Research-Related	2018	94573	NIA	94573	coastal
NIAAA	9562011	43318	PA-16-193	5K99AA025394-02	5	K99	AA	25394	2		FREEMAN, ROBERT	42988	43708	Clinical, Treatment and Health Services Research Study Section[AA-3]	14379426	18	PSYCHOLOGY	36837920	QKWEF8XLMTT3	36837920	QKWEF8XLMTT3	US	29.718091	-95.336483	1449402	U OF HOUSTON	1015	Non_Elite	female	100	HOUSTON	TX	SCHOOLS OF ARTS AND SCIENCES	772042610	UNITED STATES	N	43344	43708	273	Other Research-Related	2018	125505	NIAAA	125505	coastal
NIGMS	9583545	43319	PA-16-193	1K99GM129456-01	1	K99	GM	129456	1		SESMA, MICHAEL A	43319	44043	ZGM1-TWD-8(KR)	12006223	3	ANATOMY/CELL BIOLOGY	47120084	TX2DAGQPENZ5	47120084	TX2DAGQPENZ5	US	38.543366	-121.72946	577503	U OF CALIFORNIA AT DAVIS		Non_Elite	female	98	DAVIS	CA	SCHOOLS OF MEDICINE	956186153	UNITED STATES	N	43319	43677	859	Other Research-Related	2018	89294	NIGMS	89294	coastal
NIMH	9581675	43319	PA-16-193	1K99MH117165-01	1	K99	MH	117165	1		VAN'T VEER, ASHLEE V	43319	43692	ZMH1-ERB-M(06)	9776542	7	GENETICS	605799469	HD1WMN6945W6	605799469	HD1WMN6945W6	US	47.660307	-122.315168	9087701	U OF WASHINGTON		Elite	female	98	SEATTLE	WA	SCHOOLS OF MEDICINE	981959472	UNITED STATES	N	43319	43692	242	Other Research-Related	2018	92108	NIMH	92108	#N/A
NIAAA	9535809	43320	PA-16-193	5K99AA025401-02	5	K99	AA	25401	2		XU, BENJAMIN	42948	43677	Neuroscience and Behavior Study Section[AA-4]	10208312	3	PSYCHIATRY	43207562	FL6GV84CKN57	43207562	FL6GV84CKN57	US	41.310925	-72.926428	9420201	YALE U		Elite	female	98	NEW HAVEN	CT	SCHOOLS OF MEDICINE	65208327	UNITED STATES	N	43313	43677	273	Other Research-Related	2018	73915	NIAAA	73915	coastal
NCCIH	9548162	43321	PA-16-193	5K99AT009206-02	5	K99	AT	9206	2		BELFER, INNA	42979	43646	ZAT1-AJT(01)	12165635	6	PATHOLOGY	41387846	J22LNTMEDP73	41387846	J22LNTMEDP73	US	33.999623	-81.028249	1524302	U OF SOUTH CAROLINA AT COLUMBIA		Non_Elite	female	82	COLUMBIA	SC	SCHOOLS OF MEDICINE	292080001	UNITED STATES	N	43344	43646	213	Other Research-Related	2018	92214	NCCIH	92214	#N/A
NHLBI	9544302	43322	PA-16-193	5K99HL138255-02	5	K99	HL	138255	2		KALANTARI, ROYA	42979	43909	NHLBI Mentored Transition to Independence Study Section[MTI(MA)]	12340401	1	Unavailable	71284913	JZD1HLM2ZU83	71284913	JZD1HLM2ZU83	US	39.140663	-84.501007	615001	CINCINNATI CHILDRENS HOSP MED CTR		Non_Elite	female	98	CINCINNATI	OH	Independent Hospitals	452293039	UNITED STATES	N	43344	43909	838	Other Research-Related	2018	111030	NHLBI	111030	coastal
NIGMS	9537608	43325	PA-16-193	5K99GM121868-02	5	K99	GM	121868	2		SESMA, MICHAEL A	42948	43677	ZGM1-TWD-B(KR)	11166265	13	Unavailable	78576738	ENBLDJUN4N73	78576738	ENBLDJUN4N73	US	37.868252	-122.258486	577512	U OF CALIFORNIA BERKELEY		Elite	female	100	BERKELEY	CA	Other Domestic Non-Profits	947208118	UNITED STATES	N	43313	43677	859	Other Research-Related	2018	90000	NIGMS	90000	#N/A
NINDS	9462239	43325	PA-16-193	5K99NS101057-02	5	K99	NS	101057	2		MAMOUNAS, LAURA	42979	43465	NST-2 Study Section [NST-2]	10589178	7	BIOLOGY	47006379	JDLVAVGYJQ21	47006379	JDLVAVGYJQ21	US	42.335672	-71.104237	3212902	HARVARD MED SCH		Elite	female	97	BOSTON	MA	SCHOOLS OF MEDICINE	21201616	UNITED STATES	N	43344	43465	853	Other Research-Related	2018	88884	NINDS	88884	coastal
NIGMS	9548711	43326	PA-16-193	5K99GM124463-02	5	K99	GM	124463	2		FLICKER, PAULA F	42979	43373	ZGM1-TWD-B(KR)	11919562	13	NONE	124726725	GS3YEVSS12N6	124726725	GS3YEVSS12N6	US	37.870017	-122.268624	577502	U OF CALIFORNIA BERKELEY		Elite	female	99	BERKELEY	CA	SCHOOLS OF LAW OR CRIMINOLOGY	947101749	UNITED STATES	N	43344	43373	859	Other Research-Related	2018	7500	NIGMS	7500	coastal
NIDCD	9546647	43328	PA-16-193	5K99DC016046-02	5	K99	DC	16046	2		RIVERA-RENTAS, ALBERTO L	42979	43677	ZDC1-SRB-R(34)	10086994	12	NEUROSCIENCES	41968306	NX9PXMKW5KW8	41968306	NX9PXMKW5KW8	US	40.729659	-73.997018	5998301	NEW YORK U	5268	Elite	female	98	NEW YORK	NY	SCHOOLS OF ARTS AND SCIENCES	100122300	UNITED STATES	N	43344	43677	173	Other Research-Related	2018	131436	NIDCD	131436	#N/A
NCI	9547348	43329	PA-16-193	5K99CA218686-02	5	K99	CA	218686	2		SCHMIDT, MICHAEL K	42979	44074	Transition to Independence Study Section (I)[NCI-I]	12261871	12	PHARMACOLOGY	60217502	YNT8TCJH8FQ8	60217502	YNT8TCJH8FQ8	US	40.7607	-73.9603	1514803	WEILL MED COLL OF CORNELL U		Elite	female	97	NEW YORK	NY	SCHOOLS OF MEDICINE	100654805	UNITED STATES	N	43344	44074	398	Other Research-Related	2018	84350	NCI	84350	coastal
NIDA	9548189	43329	PA-16-193	5K99DA042934-02	5	K99	DA	42934	2		LIN, YU	42979	43708	ZDA1-SXM-M(02)S	9405198	4	PSYCHOLOGY	608195277	D3LHU66KBLD5	608195277	D3LHU66KBLD5	US	35.9316	-79.057377	578206	U OF NORTH CAROLINA CHAPEL HILL		Elite	female	99	CHAPEL HILL	NC	SCHOOLS OF ARTS AND SCIENCES	275995023	UNITED STATES	N	43344	43708	279	Other Research-Related	2018	119260	NIDA	119260	coastal
NICHD	9557058	43333	PA-16-193	5K99HD092606-02	5	K99	HD	92606	2		KING, TRACY	42983	43708	Function, Integration, and Rehabilitation Sciences Study Section[CHHD-K]	14752003	7	NONE	98987217	W8XEAJDKMXH3	98987217	W8XEAJDKMXH3	US	41.871509	-87.667721	577703	U OF ILLINOIS AT CHICAGO		Non_Elite	female	99	Chicago	IL	SCH ALLIED HEALTH PROFESSIONS	606124305	UNITED STATES	N	43344	43708	865	Other Research-Related	2018	98833	NICHD	98833	#N/A
NIGMS	9565615	43335	PA-16-193	5K99GM126141-02	5	K99	GM	126141	2		SESMA, MICHAEL A	42993	44074	ZGM1-TWD-B(KR)	9210079	27	NONE	9584210	U2JMKHNS5TG4	9584210	U2JMKHNS5TG4	US	34.134332	-118.12652	1073501	CALIFORNIA INST OF TECHNOLOGY		Elite	female	99	PASADENA	CA	SCHOOLS OF ARTS AND SCIENCES	911250001	UNITED STATES	N	43344	44074	859	Other Research-Related	2018	90000	NIGMS	90000	coastal
NIAAA	9597854	43339	PA-16-193	1K99AA026317-01A1	1	K99	AA	26317	1	A	FREEMAN, ROBERT	43344	44074	Epidemiology, Prevention and Behavior Research Study Section[AA-2]	14771745	7	PSYCHIATRY	605799469	HD1WMN6945W6	605799469	HD1WMN6945W6	US	47.660307	-122.315168	9087701	U OF WASHINGTON		Elite	female	98	SEATTLE	WA	SCHOOLS OF MEDICINE	981959472	UNITED STATES	N	43344	43708	273	Other Research-Related	2018	121431	NIAAA	121431	coastal
NEI	9548694	43339	PA-16-193	5K99EY028200-02	5	K99	EY	28200	2		AGARWAL, NEERAJ	42979	43708	ZEY1-VSN(03)	9813824	33	BIOCHEMISTRY	92530369	RN64EPNH8JC6	92530369	RN64EPNH8JC6	US	34.070199	-118.45102	577505	U OF CALIFORNIA LOS ANGELES		Elite	female	99	LOS ANGELES	CA	SCHOOLS OF MEDICINE	900952000	UNITED STATES	N	43344	43708	867	Other Research-Related	2018	107470	NEI	107470	#N/A
NHGRI	9555010	43340	PA-16-193	5K99HG009677-02	5	K99	HG	9677	2		RAMOS, ERIN	42979	43708	Genome Research Study Section[GNOM-G]	12034663	18	GENETICS	9214214	HJD6G4D6TJY5	9214214	HJD6G4D6TJY5	US	37.426852	-122.17047	8046501	STANFORD U		Elite	female	94	STANFORD	CA	SCHOOLS OF MEDICINE	943052004	UNITED STATES	N	43344	43708	172	Other Research-Related	2018	173556	NHGRI	173556	coastal
NIGMS	9565620	43342	PA-16-193	5K99GM126145-02	5	K99	GM	126145	2		FLICKER, PAULA F	42993	43708	ZGM1-TWD-B(KR)	12241807	13	BIOCHEMISTRY	124726725	GS3YEVSS12N6	124726725	GS3YEVSS12N6	US	37.870017	-122.268624	577502	U OF CALIFORNIA BERKELEY		Elite	female	100	BERKELEY	CA	GRADUATE SCHOOLS	947101749	UNITED STATES	N	43344	43708	859	Other Research-Related	2018	90000	NIGMS	90000	#N/A
NIDDK	9564106	43342	PA-16-193	5K99DK117509-02	5	K99	DK	117509	2		SPAIN, LISA M	42993	43708	ZES1-LAT-D(K1)	10876530	4	PUBLIC HEALTH & PREV MEDICINE	53599908	MZ4DYXE1SL98	53599908	MZ4DYXE1SL98	US	44.565718	-123.280906	6297004	OREGON STATE U		Non_Elite	female	95	CORVALLIS	OR	EARTH SCIENCES/RESOURCES	973318555	UNITED STATES	N	43344	43708	847	Other Research-Related	2018	90000	NIDDK	90000	coastal
NEI	9552169	43346	PA-16-193	5K99EY028224-02	5	K99	EY	28224	2		AGARWAL, NEERAJ	42979	43708	ZEY1-VSN(03)	12588481	32	Unavailable	127069466	X4J4WHWY1KH1	127069466	X4J4WHWY1KH1	US	32.676861	-96.731446	1722801	RETINA FOUNDATION OF THE SOUTHWEST		Non_Elite	female	98	DALLAS	TX	Other Domestic Non-Profits	752315082	UNITED STATES	N	43344	43708	867	Other Research-Related	2018	103885	NEI	103885	coastal
NIMH	9564188	43355	PA-16-193	5K99MH111805-02	5	K99	MH	111805	2		SARAMPOTE, CHRISTOPHER S	42990	43372	ZMH1-ERB-X(06)	10585072	3	OTHER BASIC SCIENCES	96997515	NPSNT86JKN51	96997515	NPSNT86JKN51	US	45.49882	-122.685647	6297007	OREGON HEALTH & SCI U		Non_Elite	female	98	PORTLAND	OR	SCHOOLS OF MEDICINE	972393098	UNITED STATES	N	43344	43372	242	Other Research-Related	2018	10376	NIMH	10376	coastal
NIA	9599327	43362	PA-16-193	1K99AG058800-01A1	1	K99	AG	58800	1	A	FULDNER, REBECCA A	43373	43708	Biological Aging Study Section[NIA-B]	9714653	3	VETERINARY SCIENCES	43207562	FL6GV84CKN57	43207562	FL6GV84CKN57	US	41.310925	-72.926428	9420201	YALE U		Elite	female	94	NEW HAVEN	CT	SCHOOLS OF MEDICINE	65208327	UNITED STATES	N	43373	43708	866	Other Research-Related	2018	101499	NIA	101499	coastal
NINDS	9614345	43420	PA-16-193	5K99NS104243-02	5	K99	NS	104243	2		BELLGOWAN, PATRICK S F	43084	43982	NST-2 Study Section [NST-2]	14773257	33	PSYCHOLOGY	92530369	RN64EPNH8JC6	92530369	RN64EPNH8JC6	US	34.070199	-118.45102	577505	U OF CALIFORNIA LOS ANGELES		Elite	female	97	LOS ANGELES	CA	GRADUATE SCHOOLS	900952000	UNITED STATES	N	43435	43982	853	Other Research-Related	2019	92934	NINDS	92934	coastal
NHLBI	9625731	43455	PA-16-193	5K99HL136701-02	5	K99	HL	136701	2		LIDMAN, KARIN FREDRIKSSON	43115	43830	NHLBI Mentored Transition to Independence Study Section[MTI(OA)]	11832597	18	SURGERY	9214214	HJD6G4D6TJY5	9214214	HJD6G4D6TJY5	US	37.426852	-122.17047	8046501	STANFORD U		Elite	female	98	STANFORD	CA	SCHOOLS OF MEDICINE	943052004	UNITED STATES	N	43466	43830	837	Other Research-Related	2019	120321	NHLBI	120321	#N/A
NHLBI	9619407	43469	PA-16-193	5K99HL140049-02	5	K99	HL	140049	2		HUANG, LI-SHIN	43101	43708	NHLBI Mentored Transition to Independence Study Section[MTI(OA)]	14277630	7	OTHER HEALTH PROFESSIONS	98987217	W8XEAJDKMXH3	98987217	W8XEAJDKMXH3	US	41.871509	-87.667721	577703	U OF ILLINOIS AT CHICAGO		Non_Elite	female	90	Chicago	IL	SCH ALLIED HEALTH PROFESSIONS	606124305	UNITED STATES	N	43466	43708	837	Other Research-Related	2019	106320	NHLBI	106320	coastal
NINR	9620633	43501	PA-16-193	5K99NR017416-02	5	K99	NR	17416	2		YOON, SUNG SUG	43104	43830	Nursing Science Review Committee[NRRC(69)]	11276865	12	NONE	41968306	NX9PXMKW5KW8	41968306	NX9PXMKW5KW8	US	40.729659	-73.997018	5998301	NEW YORK U		Elite	female	98	NEW YORK	NY	SCHOOLS OF NURSING	100122300	UNITED STATES	N	43466	43830	361	Other Research-Related	2019	88460	NINR	88460	coastal
NCI	9663203	43502	PA-16-193	5K99CA226399-02	5	K99	CA	226399	2		SCHMIDT, MICHAEL K	43165	43890	Transition to Independence Study Section (I)[NCI-I]	14602791	12	BIOLOGY	71037113	LHGDNJMZ64Y1	71037113	LHGDNJMZ64Y1	US	40.763746	-73.955386	7056601	ROCKEFELLER U		Non_Elite	female	93	NEW YORK	NY	GRADUATE SCHOOLS	100656399	UNITED STATES	N	43525	43890	398	Other Research-Related	2019	146963	NCI	146963	coastal
NCI	9653164	43502	PA-16-193	5K99CA218667-02	5	K99	CA	218667	2		RADAEV, SERGEY	43160	43948	Transition to Independence Study Section (I)[NCI-I]	12155791	18	RADIATION-DIAGNOSTIC/ONCOLOGY	9214214	HJD6G4D6TJY5	9214214	HJD6G4D6TJY5	US	37.426852	-122.17047	8046501	STANFORD U		Elite	female	69	STANFORD	CA	SCHOOLS OF MEDICINE	943052004	UNITED STATES	N	43525	43948	398	Other Research-Related	2019	160852	NCI	160852	#N/A
NHLBI	9664664	43506	PA-16-193	5K99HL141583-02	5	K99	HL	141583	2		HUANG, LI-SHIN	43168	43890	NHLBI Mentored Transition to Independence Study Section[MTI(JA)]	16179975	10	PHYSIOLOGY	4315578	NMJHD63STRC5	4315578	NMJHD63STRC5	US	33.931173	-83.378873	676602	U OF GEORGIA	1660	Non_Elite	female	76	ATHENS	GA	SCHOOLS OF VETERINARY MEDICINE	306021589	UNITED STATES	N	43525	43890	837	Other Research-Related	2019	108853	NHLBI	108853	#N/A
NHLBI	9660428	43511	PA-16-193	5K99HL138133-02	5	K99	HL	138133	2		GALIS, ZORINA S	43162	43691	NHLBI Mentored Transition to Independence Study Section[MTI(JA)]	12033299	12	MISCELLANEOUS	3403953	NPM2J7MSCF61	3403953	NPM2J7MSCF61	US	40.870717	-77.83415	1524202	PENNSYLVANIA STATE		Non_Elite	female	98	UNIVERSITY PARK	PA	SCH ALLIED HEALTH PROFESSIONS	168027000	UNITED STATES	N	43525	43691	837	Other Research-Related	2019	106737	NHLBI	106737	coastal
NIDCD	9657732	43523	PA-16-193	5K99DC016328-02	5	K99	DC	16328	2		RIVERA-RENTAS, ALBERTO L	43160	44347	Communication Disorders Review Committee[CDRC]	11041811	7	NEUROSCIENCES	1910777	FTMTDMBR29C7	1910777	FTMTDMBR29C7	US	39.325256	-76.605131	4134401	JOHNS HOPKINS U		Elite	female	57	BALTIMORE	MD	SCHOOLS OF MEDICINE	212182680	UNITED STATES	N	43525	44347	173	Other Research-Related	2019	136147	NIDCD	136147	coastal
NIA	9656923	43524	PA-16-193	5K99AG056667-02	5	K99	AG	56667	2		GERALD, MELISSA S	43160	43708	Behavior and Social Science of Aging Study Section[NIA-S]	14453650	3	NONE	832127323	DLWBSLWAJWR1	832127323	DLWBSLWAJWR1	US	39.999598	-83.033131	6218701	OHIO STATE U		Non_Elite	female	98	COLUMBUS	OH	SCHOOLS OF MEDICINE	432101016	UNITED STATES	N	43525	43708	866	Other Research-Related	2019	97465	NIA	97465	coastal
NCI	9669841	43530	PA-16-193	5K99CA226679-02	5	K99	CA	226679	2		SCHMIDT, MICHAEL K	43191	44043	Transition to Independence Study Section (I)[NCI-I]	11945162	14	Unavailable	139301956	DVHKP4N619V9	139301956	DVHKP4N619V9	US	28.062583	-82.419596	3736101	H LEE MOFFITT CANCER CTR & RES INST		Non_Elite	female	97	TAMPA	FL	Research Institutes	336129497	UNITED STATES	N	43556	44043	398	Other Research-Related	2019	98371	NCI	98371	coastal
NIBIB	9721602	43535	PA-18-398	1K99EB027723-01	1	K99	EB	27723	1		RAMPULLA, DAVID	43556	43921	ZEB1-OSR-E(J1)S	14528727	27	NONE	9584210	U2JMKHNS5TG4	9584210	U2JMKHNS5TG4	US	34.134332	-118.12652	1073501	CALIFORNIA INST OF TECHNOLOGY		Elite	female	84	PASADENA	CA	SCHOOLS OF ARTS AND SCIENCES	911250001	UNITED STATES	N	43556	43921	286	Other Research-Related	2019	90180	NIBIB	90180	coastal
NIDCR	9657745	43539	PA-16-193	5K99DE027706-02	5	K99	DE	27706	2		FRIEDEN, LESLIE A	43191	44043	NIDCR Special Grants Review Committee[DSR]	12461562	7	ANATOMY/CELL BIOLOGY	63690705	YND4PLMC9AN7	63690705	YND4PLMC9AN7	US	33.50591	-86.799772	1288803	U OF ALABAMA AT BIRMINGHAM		Non_Elite	female	98	BIRMINGHAM	AL	SCHOOLS OF MEDICINE	352940001	UNITED STATES	N	43556	44043	121	Other Research-Related	2019	121041	NIDCR	121041	coastal
NINDS	9652839	43542	PA-16-193	5K99NS105942-02	5	K99	NS	105942	2		HE, JANET	43191	43921	NST-2 Study Section [NST-2]	10430391	3	NEUROSCIENCES	42250712	GM1XX56LEP58	42250712	GM1XX56LEP58	US	39.953462	-75.193983	6463801	U OF PENNSYLVANIA		Elite	female	99	PHILADELPHIA	PA	SCHOOLS OF MEDICINE	191046205	UNITED STATES	N	43556	43921	853	Other Research-Related	2019	82188	NINDS	82188	coastal
NINDS	9681491	43543	PA-16-193	5K99NS102884-02	5	K99	NS	102884	2		KOENIG, JAMES I	43205	43921	ZNS1-SRB-L(11)	9747164	18	RADIATION-DIAGNOSTIC/ONCOLOGY	9214214	HJD6G4D6TJY5	9214214	HJD6G4D6TJY5	US	37.426852	-122.17047	8046501	STANFORD U		Elite	female	97	STANFORD	CA	SCHOOLS OF MEDICINE	943052004	UNITED STATES	N	43556	43921	853	Other Research-Related	2019	84334	NINDS	84334	coastal
NIMHD	9676408	43543	PA-16-193	5K99MD012615-02	5	K99	MD	12615	2		JEAN-FRANCOIS, BEDA	43191	43738	ZMD1-RP(J1)	11627511	12	PUBLIC HEALTH & PREV MEDICINE	94878337	KMH5K9V7S518	94878337	KMH5K9V7S518	US	37.767442	-122.413937	577508	U OF CALIFORNIA SAN FRANCISCO		Elite	female	83	SAN FRANCISCO	CA	SCHOOLS OF MEDICINE	941432510	UNITED STATES	N	43556	43738	307	Other Research-Related	2019	72190	NIMHD	72190	coastal
NIDA	9742953	43544	PA-18-398	1K99DA046514-01A1	1	K99	DA	46514	1	A	SORENSEN, ROGER	43647	44012	ZDA1-SXM-M(01)S	12589007	52	NEUROSCIENCES	804355790	UYTTZT6G9DT1	804355790	UYTTZT6G9DT1	US	32.876991	-117.24087	577507	U OF CALIFORNIA SAN DIEGO		Elite	female	62	LA JOLLA	CA	SCHOOLS OF MEDICINE	920930621	UNITED STATES	N	43647	44012	279	Other Research-Related	2019	171515	NIDA	171515	coastal
NIA	9667369	43546	PA-16-193	5K99AG058748-02	5	K99	AG	58748	2		WAGSTER, MOLLY V	43191	43722	Basic Neuroscience of Aging Study Section[NIA-N]	9574886	13	Unavailable	78576738	ENBLDJUN4N73	78576738	ENBLDJUN4N73	US	37.868252	-122.258486	577512	U OF CALIFORNIA BERKELEY		Elite	female	98	BERKELEY	CA	Other Domestic Non-Profits	947208118	UNITED STATES	N	43556	43722	866	Other Research-Related	2019	129108	NIA	129108	coastal
NIA	9668992	43546	PA-16-193	5K99AG058786-02	5	K99	AG	58786	2		WAGSTER, MOLLY V	43191	44049	Basic Neuroscience of Aging Study Section[NIA-N]	14766994	3	NEUROSCIENCES	969663814	NNFQH1JAPEP3	969663814	NNFQH1JAPEP3	US	29.643443	-82.349637	513806	U OF FLORIDA		Non_Elite	female	98	GAINESVILLE	FL	SCHOOLS OF MEDICINE	326115500	UNITED STATES	N	43556	44049	866	Other Research-Related	2019	86073	NIA	86073	coastal
NINR	9673231	43546	PA-16-193	5K99NR017651-02	5	K99	NR	17651	2		HAMLET, MICHELLE R	43252	43921	Nursing Science Review Committee[NRRC(70)]	10906545	13	OTHER HEALTH PROFESSIONS	621889815	QHF5ZZ114M72	621889815	QHF5ZZ114M72	US	40.8415	-73.9414	1833205	COLUMBIA U HEALTH SCI		Elite	female	98	NEW YORK	NY	SCHOOLS OF NURSING	100323725	UNITED STATES	N	43556	43921	361	Other Research-Related	2019	90185	NINR	90185	coastal
NIGMS	9683911	43556	PA-16-193	5K99GM126277-02	5	K99	GM	126277	2		FLICKER, PAULA F	43200	43708	ZGM1-TWD-B(KR)	14484048	7	MISCELLANEOUS	1425594	E2NYLCDML6V1	1425594	E2NYLCDML6V1	US	42.359128	-71.093339	4911501	MASSACHUSETTS INST OF TECHNOLOGY		Elite	female	99	CAMBRIDGE	MA	OTHER SPECIALIZED SCHOOLS	21421029	UNITED STATES	N	43556	43708	859	Other Research-Related	2019	81818	NIGMS	81818	coastal
NICHD	9670138	43557	PA-16-193	5K99HD092625-02	5	K99	HD	92625	2		RAVINDRANATH, NEELAKANTA	43191	43921	Developmental Biology Study Section[CHHD-C]	11739395	1	BIOCHEMISTRY	1785542	E3FDXZ6TBHW3	1785542	E3FDXZ6TBHW3	US	41.826136	-71.404513	1003201	BROWN U		Elite	female	98	PROVIDENCE	RI	SCHOOLS OF MEDICINE	29034202	UNITED STATES	N	43556	43921	865	Other Research-Related	2019	117658	NICHD	117658	coastal
NIAID	9688186	43559	PA-16-193	5K99AI130258-02	5	K99	AI	130258	2		GONDRE-LEWIS, TIMOTHY A	43221	43723	Allergy, Immunology, and Transplantation Research Committee[AITC]	11574618	7	Unavailable	76593722	Z1L9F1MM1RY3	76593722	Z1L9F1MM1RY3	US	42.337481	-71.104964	1504801	BOSTON CHILDRENS HOSP		Elite	female	99	BOSTON	MA	Independent Hospitals	21155724	UNITED STATES	N	43586	43723	855	Other Research-Related	2019	70114	NIAID	70114	coastal
NIMH	9692800	43568	PA-16-193	5K99MH116735-02	5	K99	MH	116735	2		SENN, THERESA ELAINE	43221	43951	ZMH1-ERB-S(02)	11787219	6	PUBLIC HEALTH & PREV MEDICINE	41096314	MW8JHK6ZYEX8	41096314	MW8JHK6ZYEX8	US	39.745098	-104.837605	1199905	U OF COLORADO DENVER		Non_Elite	female	96	Aurora	CO	SCHOOLS OF PUBLIC HEALTH	800452570	UNITED STATES	N	43586	43951	242	Other Research-Related	2019	83169	NIMH	83169	coastal
NICHD	9719866	43579	PA-16-193	5K99HD091452-02	5	K99	HD	91452	2		ILEKIS, JOHN V	43266	43982	ZHD1-DSR-G(02)	14517369	52	PATHOLOGY	804355790	UYTTZT6G9DT1	804355790	UYTTZT6G9DT1	US	32.876991	-117.24087	577507	U OF CALIFORNIA SAN DIEGO		Elite	female	88	LA JOLLA	CA	SCHOOLS OF MEDICINE	920930621	UNITED STATES	N	43617	43982	865	Other Research-Related	2019	103589	NICHD	103589	coastal
NIDA	9683867	43580	PA-16-193	5K99DA046311-02	5	K99	DA	46311	2		CRUMP, ARIA	43221	43982	ZDA1-SXM-M(02)S	11368028	26	NONE	71298814	Q3KCVK5S9CP1	71298814	Q3KCVK5S9CP1	US	25.761055	-80.376195	513809	FLORIDA INTERNATIONAL U		Non_Elite	female	98	MIAMI	FL	ORGANIZED RESEARCH UNITS	331992516	UNITED STATES	N	43586	43982	279	Other Research-Related	2019	179707	NIDA	179707	coastal
NIDA	9689998	43581	PA-16-193	5K99DA042100-02	5	K99	DA	42100	2		LIN, YU	43221	43951	ZDA1-SXM-M(01)S	9701463	13	NEUROSCIENCES	78861598	C8H9CNG1VBD9	78861598	C8H9CNG1VBD9	US	40.790284	-73.946781	3839801	ICAHN SCH OF MED AT MOUNT SINAI		Non_Elite	female	79	NEW YORK	NY	SCHOOLS OF MEDICINE	100296574	UNITED STATES	N	43586	43951	279	Other Research-Related	2019	177930	NIDA	177930	#N/A
NHLBI	9689354	43584	PA-16-193	5K99HL141630-02	5	K99	HL	141630	2		WANG, WAYNE C	43221	43761	NHLBI Mentored Transition to Independence Study Section[MTI(JA)]	12466709	30	BIOCHEMISTRY	800771545	YZJ6DKPM4W63	800771545	YZJ6DKPM4W63	US	32.811963	-96.837534	578404	UT SOUTHWESTERN MED CTR		Non_Elite	female	98	DALLAS	TX	SCHOOLS OF MEDICINE	753909105	UNITED STATES	N	43586	43761	837	Other Research-Related	2019	88434	NHLBI	88434	coastal
NIGMS	9673752	43585	PA-16-193	5K99GM123221-02	5	K99	GM	123221	2		FLICKER, PAULA F	43191	43982	ZGM1-TWD-Y(KR)	12108460	30	PLASTIC SURGERY	800771545	YZJ6DKPM4W63	800771545	YZJ6DKPM4W63	US	32.811963	-96.837534	578404	UT SOUTHWESTERN MED CTR		Non_Elite	female	99	DALLAS	TX	SCHOOLS OF MEDICINE	753909105	UNITED STATES	N	43556	43982	859	Other Research-Related	2019	90000	NIGMS	90000	coastal
NIGMS	9700172	43585	PA-16-193	5K99GM126136-02	5	K99	GM	126136	2		FLICKER, PAULA F	43238	43738	ZGM1-TWD-B(KR)	11989947	12	PHARMACOLOGY	94878337	KMH5K9V7S518	94878337	KMH5K9V7S518	US	37.767442	-122.413937	577508	U OF CALIFORNIA SAN FRANCISCO		Elite	female	56	SAN FRANCISCO	CA	SCHOOLS OF PHARMACY	941432510	UNITED STATES	N	43586	43738	859	Other Research-Related	2019	37500	NIGMS	37500	#N/A
NIMHD	9766397	43599	PA-16-193	5K99MD012808-02	5	K99	MD	12808	2		RAJAPAKSE, NISHADI	43329	43982	ZMD1-XLN(M1)	10600323	4	PUBLIC HEALTH & PREV MEDICINE	608195277	D3LHU66KBLD5	608195277	D3LHU66KBLD5	US	35.9316	-79.057377	578206	U OF NORTH CAROLINA CHAPEL HILL		Elite	female	100	CHAPEL HILL	NC	SCHOOLS OF PUBLIC HEALTH	275995023	UNITED STATES	N	43617	43982	307	Other Research-Related	2019	90836	NIMHD	90836	coastal
NIMHD	9763636	43599	PA-16-193	5K99MD012807-02	5	K99	MD	12807	2		SAYRE, MICHAEL	43326	43830	ZMD1-XLN(M1)	12653722	7	ADMINISTRATION	605799469	HD1WMN6945W6	605799469	HD1WMN6945W6	US	47.660307	-122.315168	9087701	U OF WASHINGTON		Elite	female	98	SEATTLE	WA	SCHOOLS OF PUBLIC HEALTH	981959472	UNITED STATES	N	43617	43830	307	Other Research-Related	2019	86016	NIMHD	86016	coastal
NIMHD	9783885	43601	PA-16-193	5K99MD012253-02	5	K99	MD	12253	2		JEAN-FRANCOIS, BEDA	43355	44347	ZMD1-XLN(M1)	14321655	7	DENTISTRY	47006379	JDLVAVGYJQ21	47006379	JDLVAVGYJQ21	US	42.335672	-71.104237	3212902	HARVARD MED SCH		Elite	female	82	BOSTON	MA	SCHOOLS OF DENTISTRY/ORAL HYGN	21201616	UNITED STATES	N	43617	44347	307	Other Research-Related	2019	118486	NIMHD	118486	#N/A
NIMHD	9769129	43601	PA-16-193	5K99MD012811-02	5	K99	MD	12811	2		BERZON, RICHARD	43335	43982	ZMD1-XLN(M1)	15169883	12	INTERNAL MEDICINE/MEDICINE	121911077	M5SZJ6VHUHN8	121911077	M5SZJ6VHUHN8	US	40.669895	-73.974354	5998304	NEW YORK U SCH OF MED		Elite	female	63	NEW YORK	NY	SCHOOLS OF MEDICINE	10016	UNITED STATES	N	43617	43982	307	Other Research-Related	2019	103417	NIMHD	103417	coastal
NIDCR	9733195	43601	PA-16-193	5K99DE028019-02	5	K99	DE	28019	2		FRIEDEN, LESLIE A	43282	44012	NIDCR Special Grants Review Committee[DSR]	11641494	12	DENTISTRY	41968306	NX9PXMKW5KW8	41968306	NX9PXMKW5KW8	US	40.729659	-73.997018	5998301	NEW YORK U		Elite	female	98	NEW YORK	NY	SCHOOLS OF DENTISTRY/ORAL HYGN	100122300	UNITED STATES	N	43647	44012	121	Other Research-Related	2019	99855	NIDCR	99855	coastal
NCI	9736659	43605	PA-16-193	5K99CA230192-02	5	K99	CA	230192	2		SCHMIDT, MICHAEL K	43283	44074	Transition to Independence Study Section (I)[NCI-I]	14726992	7	INTERNAL MEDICINE/MEDICINE	1910777	FTMTDMBR29C7	1910777	FTMTDMBR29C7	US	39.325256	-76.605131	4134401	JOHNS HOPKINS U		Elite	female	97	BALTIMORE	MD	SCHOOLS OF MEDICINE	212182680	UNITED STATES	N	43647	44074	398	Other Research-Related	2019	89503	NCI	89503	coastal
NIA	9773885	43605	PA-16-193	5K99AG059893-02	5	K99	AG	59893	2		MACKIEWICZ, MIROSLAW	43344	43982	Basic Neuroscience of Aging Study Section[NIA-N]	14497047	8	Unavailable	73130411	FLJ7DQKLL226	73130411	FLJ7DQKLL226	US	42.363198	-71.068772	4907701	MASSACHUSETTS GENERAL HOSP		Elite	female	99	BOSTON	MA	Independent Hospitals	21142621	UNITED STATES	N	43617	43982	866	Other Research-Related	2019	136360	NIA	136360	#N/A
NICHD	9742508	43613	PA-16-193	5K99HD096109-02	5	K99	HD	96109	2		MIODOVNIK, MENACHEM	43291	44012	Obstetrics and Maternal-Fetal Biology Study Section[CHHD-B]	14525707	45	PEDIATRICS	46705849	MJC5FCYQTPE6	46705849	MJC5FCYQTPE6	US	33.64852	-117.82136	577504	U OF CALIFORNIA IRVINE		Non_Elite	female	96	IRVINE	CA	SCHOOLS OF MEDICINE	926970001	UNITED STATES	N	43647	44012	865	Other Research-Related	2019	94059	NICHD	94059	coastal
NIEHS	9697321	43614	PA-16-193	5K99ES029104-02	5	K99	ES	29104	2		HOLLANDER, JONATHAN	43252	43965	ZES1-LAT-S(K8)	14124607	1	PHARMACOLOGY	829868723	G389MFAYJNG9	829868723	G389MFAYJNG9	US	35.090968	-106.617544	10021612	U OF NEW MEXICO HEALTH SCI CTR	1656	Non_Elite	female	99	ALBUQUERQUE	NM	SCHOOLS OF PHARMACY	871310001	UNITED STATES	N	43617	43965	113	Other Research-Related	2019	85401	NIEHS	85401	coastal
NIA	9742415	43626	PA-16-193	5K99AG058780-02	5	K99	AG	58780	2		OPANASHUK, LISA A	43296	44012	Basic Neuroscience of Aging Study Section[NIA-N]	10725135	37	PHYSIOLOGY	72933393	G88KLJR3KYT5	72933393	G88KLJR3KYT5	US	34.017282	-118.281254	7636101	U OF SOUTHERN CALIFORNIA		Non_Elite	female	98	Los Angeles	CA	SCHOOLS OF MEDICINE	900894304	UNITED STATES	N	43647	44012	866	Other Research-Related	2019	126225	NIA	126225	coastal
NIAID	9733912	43628	PA-16-193	5K99AI139344-02	5	K99	AI	139344	2		ERNST, NANCY L	43282	44012	Microbiology and Infectious Diseases Advisory Committee[MID]	12330439	7	Unavailable	78200995	HMSNCM57QNR5	78200995	HMSNCM57QNR5	US	47.627342	-122.331593	861001	FRED HUTCHINSON CANCER RES CTR		Elite	female	95	SEATTLE	WA	Research Institutes	981094433	UNITED STATES	N	43647	44012	855	Other Research-Related	2019	108648	NIAID	108648	#N/A
NIBIB	9805608	43630	PA-18-398	1K99EB028311-01	1	K99	EB	28311	1		ERIM, ZEYNEP	43647	44377	ZEB1-OSR-E(M2)S	11827707	7	MISCELLANEOUS	1425594	E2NYLCDML6V1	1425594	E2NYLCDML6V1	US	42.359128	-71.093339	4911501	MASSACHUSETTS INST OF TECHNOLOGY		Elite	female	81	CAMBRIDGE	MA	ORGANIZED RESEARCH UNITS	21421029	UNITED STATES	N	43647	44377	286	Other Research-Related	2019	87484	NIBIB	87484	coastal
NHLBI	9676376	43633	PA-16-193	5K99HL141687-02	5	K99	HL	141687	2		YANG, YU-CHUNG	43282	44377	NHLBI Mentored Transition to Independence Study Section[MTI(JA)]	11097161	3	INTERNAL MEDICINE/MEDICINE	43207562	FL6GV84CKN57	43207562	FL6GV84CKN57	US	41.310925	-72.926428	9420201	YALE U		Elite	female	100	NEW HAVEN	CT	SCHOOLS OF MEDICINE	65208327	UNITED STATES	N	43647	44377	839	Other Research-Related	2019	102716	NHLBI	102716	#N/A
NCCIH	9746590	43633	PA-16-193	5K99AT010012-02	5	K99	AT	10012	2		TUTTLE, ALEXANDER H	43298	44377	ZAT1-VS(09)	12643663	5	INTERNAL MEDICINE/MEDICINE	555917996	KABJZBBJ4B54	555917996	KABJZBBJ4B54	US	44.975143	-93.227003	1450402	U OF MINNESOTA		Non_Elite	female	89	MINNEAPOLIS	MN	SCHOOLS OF MEDICINE	554552070	UNITED STATES	N	43647	44377	213	Other Research-Related	2019	99195	NCCIH	99195	coastal
NCI	9743114	43635	PA-16-193	5K99CA230195-02	5	K99	CA	230195	2		SCHMIDT, MICHAEL K	43292	43951	Transition to Independence Study Section (I)[NCI-I]	14079667	12	Unavailable	64931884	KUKXRCZ6NZC2	64931884	KUKXRCZ6NZC2	US	40.764045	-73.956024	5079202	SLOAN KETTERING INST CAN RES		Non_Elite	female	92	NEW YORK	NY	Research Institutes	100656007	UNITED STATES	N	43647	43951	398	Other Research-Related	2019	134632	NCI	134632	coastal
NEI	9784847	43636	PA-16-193	5K99EY029330-02	5	K99	EY	29330	2		AGARWAL, NEERAJ	43373	44012	ZEY1-VSN(02)	15182725	18	NEUROLOGY	9214214	HJD6G4D6TJY5	9214214	HJD6G4D6TJY5	US	37.426852	-122.17047	8046501	STANFORD U		Elite	female	63	STANFORD	CA	SCHOOLS OF MEDICINE	943052004	UNITED STATES	N	43647	44012	867	Other Research-Related	2019	101400	NEI	101400	#N/A
NIDCD	9741686	43642	PA-16-193	5K99DC016640-02	5	K99	DC	16640	2		RIVERA-RENTAS, ALBERTO L	43291	44012	Communication Disorders Review Committee[CDRC]	12252365	7	OTHER HEALTH PROFESSIONS	605799469	HD1WMN6945W6	605799469	HD1WMN6945W6	US	47.660307	-122.315168	9087701	U OF WASHINGTON		Elite	female	92	SEATTLE	WA	SCHOOLS OF ARTS AND SCIENCES	981959472	UNITED STATES	N	43647	44012	173	Other Research-Related	2019	128083	NIDCD	128083	coastal
NIMH	9734173	43649	PA-16-193	5K99MH117393-02	5	K99	MH	117393	2		DRISCOLL, JAMIE	43282	44012	ZMH1-ERB-M(06)	12441229	13	NONE	124726725	GS3YEVSS12N6	124726725	GS3YEVSS12N6	US	37.870017	-122.268624	577502	U OF CALIFORNIA BERKELEY		Elite	female	79	BERKELEY	CA	BIOMED ENGR/COL ENGR/ENGR STA	947101749	UNITED STATES	N	43647	44012	242	Other Research-Related	2019	115560	NIMH	115560	coastal
NCI	9781684	43650	PA-18-397	5K99CA234455-02	5	K99	CA	234455	2		RADAEV, SERGEY	43353	44074	Transition to Independence Study Section (I)[NCI-I]	14584153	4	BIOMEDICAL ENGINEERING	44387793	TP7EK8DZV6N5	44387793	TP7EK8DZV6N5	US	36.007766	-78.926475	2221101	DUKE U		Elite	female	98	DURHAM	NC	BIOMED ENGR/COL ENGR/ENGR STA	277054673	UNITED STATES	N	43709	44074	398	Other Research-Related	2019	91644	NCI	91644	coastal
NINDS	9751994	43657	PA-16-193	5K99NS107639-02	5	K99	NS	107639	2		SIEBER, BETH-ANNE	43313	44196	NST-2 Study Section [NST-2]	12486141	7	MISCELLANEOUS	1425594	E2NYLCDML6V1	1425594	E2NYLCDML6V1	US	42.359128	-71.093339	4911501	MASSACHUSETTS INST OF TECHNOLOGY		Elite	female	98	CAMBRIDGE	MA	ORGANIZED RESEARCH UNITS	21421029	UNITED STATES	N	43678	44196	853	Other Research-Related	2019	93528	NINDS	93528	coastal
NIEHS	9757770	43658	PA-16-193	5K99ES028711-02	5	K99	ES	28711	2		JOUBERT, BONNIE	43327	43890	ZES1-LAT-D(K1)	12406084	6	PUBLIC HEALTH & PREV MEDICINE	41096314	MW8JHK6ZYEX8	41096314	MW8JHK6ZYEX8	US	39.745098	-104.837605	1199905	U OF COLORADO DENVER		Non_Elite	female	98	Aurora	CO	SCHOOLS OF PUBLIC HEALTH	800452570	UNITED STATES	N	43678	43890	113	Other Research-Related	2019	78194	NIEHS	78194	coastal
NIMH	9705932	43662	PA-16-193	5K99MH117274-02	5	K99	MH	117274	2		BECHTHOLT, ANITA J	43282	43692	ZMH1-ERB-M(06)	10308192	3	PSYCHIATRY	42250712	GM1XX56LEP58	42250712	GM1XX56LEP58	US	39.953462	-75.193983	6463801	U OF PENNSYLVANIA		Elite	female	95	PHILADELPHIA	PA	SCHOOLS OF MEDICINE	191046205	UNITED STATES	N	43647	43692	242	Other Research-Related	2019	11937	NIMH	11937	#N/A
NICHD	9805815	43663	PA-18-398	1K99HD099330-01	1	K99	HD	99330	1		WINER, KAREN	43663	44013	Reproduction, Andrology, and Gynecology Study Section[CHHD-R]	14377561	3	Unavailable	73757627	G7MQPLSUX1L4	73757627	G7MQPLSUX1L4	US	39.946632	-75.196604	1499101	CHILDRENS HOSP OF PHILADELPHIA		Elite	female	98	PHILADELPHIA	PA	Independent Hospitals	191462305	UNITED STATES	N	43663	44013	865	Other Research-Related	2019	131733	NICHD	131733	#N/A
NICHD	9751352	43667	PA-16-193	5K99HD096112-02	5	K99	HD	96112	2		ILEKIS, JOHN V	43313	44043	Obstetrics and Maternal-Fetal Biology Study Section[CHHD-B]	12479806	7	Unavailable	135646524	SMK9PCMKXED6	135646524	SMK9PCMKXED6	US	47.622538	-122.337533	4106301	INST FOR SYSTEMS BIOLOGY		Non_Elite	female	93	SEATTLE	WA	Research Institutes	981095263	UNITED STATES	N	43678	44043	865	Other Research-Related	2019	128953	NICHD	128953	coastal
NICHD	9784609	43668	PA-16-193	5K99HD096115-02	5	K99	HD	96115	2		PARISI, MELISSA	43367	43844	Pediatrics Study Section[CHHD-A]	12483393	3	VETERINARY SCIENCES	42250712	GM1XX56LEP58	42250712	GM1XX56LEP58	US	39.953462	-75.193983	6463801	U OF PENNSYLVANIA		Elite	female	95	PHILADELPHIA	PA	SCHOOLS OF VETERINARY MEDICINE	191046205	UNITED STATES	N	43709	43844	865	Other Research-Related	2019	89176	NICHD	89176	coastal
NIMH	9747995	43668	PA-16-193	5K99MH115143-02	5	K99	MH	115143	2		VAN'T VEER, ASHLEE V	43313	44043	ZMH1-ERB-M(06)	14358558	33	NONE	92530369	RN64EPNH8JC6	92530369	RN64EPNH8JC6	US	34.070199	-118.45102	577505	U OF CALIFORNIA LOS ANGELES		Elite	female	98	LOS ANGELES	CA	SCHOOLS OF MEDICINE	900952000	UNITED STATES	N	43678	44043	242	Other Research-Related	2019	128601	NIMH	128601	coastal
NIMH	9722306	43668	PA-16-193	5K99MH113820-02	5	K99	MH	113820	2		BECHTHOLT, ANITA J	43282	44012	ZMH1-ERB-M(06)	14215686	33	NONE	92530369	RN64EPNH8JC6	92530369	RN64EPNH8JC6	US	34.070199	-118.45102	577505	U OF CALIFORNIA LOS ANGELES		Elite	female	98	LOS ANGELES	CA	SCHOOLS OF MEDICINE	900952000	UNITED STATES	N	43647	44012	242	Other Research-Related	2019	120096	NIMH	120096	coastal
NIMH	9748606	43668	PA-16-193	5K99MH116065-02	5	K99	MH	116065	2		VAN'T VEER, ASHLEE V	43313	43938	ZMH1-ERB-S(02)	12479333	18	PSYCHIATRY	9214214	HJD6G4D6TJY5	9214214	HJD6G4D6TJY5	US	37.426852	-122.17047	8046501	STANFORD U		Elite	female	99	STANFORD	CA	SCHOOLS OF MEDICINE	943052004	UNITED STATES	N	43678	43938	242	Other Research-Related	2019	96534	NIMH	96534	coastal
NCI	9741102	43669	PA-16-193	5K99CA230202-02	5	K99	CA	230202	2		SCHMIDT, MICHAEL K	43313	43890	Transition to Independence Study Section (I)[NCI-I]	12602338	1	INTERNAL MEDICINE/MEDICINE	68552207	L6NFUM28LQM5	68552207	L6NFUM28LQM5	US	38.664368	-90.323797	9083901	WASHINGTON U		Non_Elite	female	98	SAINT LOUIS	MO	SCHOOLS OF MEDICINE	631304862	UNITED STATES	N	43678	43890	398	Other Research-Related	2019	91044	NCI	91044	coastal
NICHD	9780547	43669	PA-16-193	5K99HD096123-02	5	K99	HD	96123	2		PAWLYK, AARON C	43350	44012	Pediatrics Study Section[CHHD-A]	11758817	3	Unavailable	73757627	G7MQPLSUX1L4	73757627	G7MQPLSUX1L4	US	39.946632	-75.196604	1499101	CHILDRENS HOSP OF PHILADELPHIA		Elite	female	98	PHILADELPHIA	PA	Independent Hospitals	191462305	UNITED STATES	N	43715	44012	865	Other Research-Related	2019	110560	NICHD	110560	coastal
NIDA	9759895	43670	PA-16-193	5K99DA045749-02	5	K99	DA	45749	2		WALTON, KEVIN	43327	44135	ZDA1-SXM-M(02)S	12192607	33	NONE	92530369	RN64EPNH8JC6	92530369	RN64EPNH8JC6	US	34.070199	-118.45102	577505	U OF CALIFORNIA LOS ANGELES		Elite	female	98	LOS ANGELES	CA	SCHOOLS OF MEDICINE	900952000	UNITED STATES	N	43678	44135	279	Other Research-Related	2019	182401	NIDA	182401	#N/A
NIBIB	9747294	43670	PA-16-193	5K99EB023993-02	5	K99	EB	23993	2		KING, RANDY LEE	43313	44043	ZEB1-OSR-E(O1)	12055249	8	Unavailable	73130411	FLJ7DQKLL226	73130411	FLJ7DQKLL226	US	42.363198	-71.068772	4907701	MASSACHUSETTS GENERAL HOSP		Elite	female	52	BOSTON	MA	Independent Hospitals	21142621	UNITED STATES	N	43678	44043	286	Other Research-Related	2019	94986	NIBIB	94986	coastal
NINDS	9786825	43670	PA-18-398	5K99NS109252-02	5	K99	NS	109252	2		CHEEVER, THOMAS	43373	44074	NST-2 Study Section [NST-2]	14343949	7	NEUROLOGY	5436803	KG76WYENL5K1	5436803	KG76WYENL5K1	US	42.050479	-87.680046	6144650	NORTHWESTERN U		Elite	female	98	CHICAGO	IL	SCHOOLS OF MEDICINE	606114579	UNITED STATES	N	43709	44074	853	Other Research-Related	2019	89478	NINDS	89478	#N/A
NINR	9751396	43672	PA-16-193	5K99NR017829-02	5	K99	NR	17829	2		HENRY, REBECCA	43344	44074	Nursing Science Review Committee[NRRC(71)]	11997565	13	OTHER HEALTH PROFESSIONS	621889815	QHF5ZZ114M72	621889815	QHF5ZZ114M72	US	40.8415	-73.9414	1833205	COLUMBIA U HEALTH SCI		Elite	female	98	NEW YORK	NY	SCHOOLS OF NURSING	100323725	UNITED STATES	N	43709	44074	361	Other Research-Related	2019	89309	NINR	89309	#N/A
NIAID	9772252	43672	PA-16-193	5K99AI129739-02	5	K99	AI	129739	2		CONLEY, TONY J	43344	44439	Acquired Immunodeficiency Syndrome Research Study Section[AIDS]	14486011	18	MICROBIOLOGY/IMMUN/VIROLOGY	9214214	HJD6G4D6TJY5	9214214	HJD6G4D6TJY5	US	37.426852	-122.17047	8046501	STANFORD U		Elite	female	75	STANFORD	CA	SCHOOLS OF MEDICINE	943052004	UNITED STATES	N	43709	44439	855	Other Research-Related	2019	127035	NIAID	127035	coastal
NIEHS	9756412	43675	PA-16-193	5K99ES029571-02	5	K99	ES	29571	2		BOYLES, ABEE	43327	43830	ZES1-LAT-D(K1)	12168707	13	PUBLIC HEALTH & PREV MEDICINE	78861598	C8H9CNG1VBD9	78861598	C8H9CNG1VBD9	US	40.790284	-73.946781	3839801	ICAHN SCH OF MED AT MOUNT SINAI		Non_Elite	female	95	NEW YORK	NY	SCHOOLS OF MEDICINE	100296574	UNITED STATES	N	43678	43830	113	Other Research-Related	2019	102984	NIEHS	102984	coastal
NHLBI	9761559	43675	PA-16-193	5K99HL143165-02	5	K99	HL	143165	2		OCHOCINSKA, MARGARET J	43327	43921	NHLBI Mentored Transition to Independence Study Section[MTI(MA)]	10529882	5	INTERNAL MEDICINE/MEDICINE	65391526	JJG6HU8PA4S5	65391526	JJG6HU8PA4S5	US	38.050527	-78.500531	1526402	U OF VIRGINIA		Non_Elite	female	95	CHARLOTTESVILLE	VA	SCHOOLS OF MEDICINE	229044195	UNITED STATES	N	43678	43921	839	Other Research-Related	2019	103151	NHLBI	103151	#N/A
NHLBI	9736788	43675	PA-16-193	5K99HL141658-02	5	K99	HL	141658	2		KALANTARI, ROYA	43313	44043	NHLBI Mentored Transition to Independence Study Section[MTI(JA)]	12431807	1	Unavailable	76443019	VLQKFEEJ3NE9	76443019	VLQKFEEJ3NE9	US	39.739206	-104.941874	5720901	NATIONAL JEWISH HEALTH		Non_Elite	female	98	DENVER	CO	Independent Hospitals	802062761	UNITED STATES	N	43678	44043	838	Other Research-Related	2019	158139	NHLBI	158139	coastal
NICHD	9774271	43675	PA-16-193	5K99HD094648-02	5	K99	HD	94648	2		BURES, REGINA M	43343	44043	Behavioral and Social Consequences of HIV/AIDS Study Section[BSCH]	12544712	1	INTERNAL MEDICINE/MEDICINE	5421136	ZUE9HKT2CLC9	5421136	ZUE9HKT2CLC9	US	41.789554	-87.601172	1413601	U OF CHICAGO		Elite	female	94	CHICAGO	IL	SCHOOLS OF MEDICINE	606372612	UNITED STATES	N	43678	44043	865	Other Research-Related	2019	94578	NICHD	94578	coastal
NIGMS	9806197	43676	PA-18-398	1K99GM134187-01	1	K99	GM	134187	1		FLICKER, PAULA F	43678	44043	ZGM1-TWD-8(KR)	14511977	18	CHEMISTRY	9214214	HJD6G4D6TJY5	9214214	HJD6G4D6TJY5	US	37.426852	-122.17047	8046501	STANFORD U		Elite	female	98	STANFORD	CA	SCHOOLS OF ARTS AND SCIENCES	943052004	UNITED STATES	N	43678	44043	859	Other Research-Related	2019	100000	NIGMS	100000	coastal
NICHD	9741143	43677	PA-16-193	5K99HD093798-02	5	K99	HD	93798	2		DAVIS, MAURICE	43344	44074	Health, Behavior, and Context Study Section[CHHD-M]	14656126	12	OBSTETRICS & GYNECOLOGY	94878337	KMH5K9V7S518	94878337	KMH5K9V7S518	US	37.767442	-122.413937	577508	U OF CALIFORNIA SAN FRANCISCO		Elite	female	100	SAN FRANCISCO	CA	SCHOOLS OF MEDICINE	941432510	UNITED STATES	N	43709	44074	865	Other Research-Related	2019	131647	NICHD	131647	coastal
NIA	9759750	43677	PA-16-193	5K99AG059950-02	5	K99	AG	59950	2		PATMIOS, GEORGEANNE E	43344	44227	Behavior and Social Science of Aging Study Section[NIA-S]	14978022	13	SOCIAL SCIENCES	124726725	GS3YEVSS12N6	124726725	GS3YEVSS12N6	US	37.870017	-122.268624	577502	U OF CALIFORNIA BERKELEY		Elite	female	98	BERKELEY	CA	SCHOOLS OF ARTS AND SCIENCES	947101749	UNITED STATES	N	43709	44227	866	Other Research-Related	2019	139979	NIA	139979	coastal
NHLBI	9765380	43677	PA-16-193	5K99HL143207-02	5	K99	HL	143207	2		LAPOSKY, AARON D	43332	43904	NHLBI Mentored Transition to Independence Study Section[MTI(MA)]	12190638	3	OTHER HEALTH PROFESSIONS	969663814	NNFQH1JAPEP3	969663814	NNFQH1JAPEP3	US	29.643443	-82.349637	513806	U OF FLORIDA		Non_Elite	female	93	GAINESVILLE	FL	SCHOOLS OF PUBLIC HEALTH	326115500	UNITED STATES	N	43678	43904	838	Other Research-Related	2019	133290	NHLBI	133290	#N/A
NHLBI	9806864	43682	PA-18-398	1K99HL148493-01	1	K99	HL	148493	1		HUANG, LI-SHIN	43682	44043	NHLBI Mentored Transition to Independence Study Section[MTI(MA)]	15276905	33	INTERNAL MEDICINE/MEDICINE	92530369	RN64EPNH8JC6	92530369	RN64EPNH8JC6	US	34.070199	-118.45102	577505	U OF CALIFORNIA LOS ANGELES		Elite	female	62	LOS ANGELES	CA	SCHOOLS OF MEDICINE	900952000	UNITED STATES	N	43682	44043	837	Other Research-Related	2019	117475	NHLBI	117475	coastal
NIA	9788204	43682	PA-16-193	5K99AG056662-02	5	K99	AG	56662	2		DIBATTISTA, AMANDA	43373	44074	Biological Aging Study Section[NIA-B]	11996250	5	PHYSICAL MEDICINE & REHAB	878648294	GY8NMUZQXVS7	878648294	GY8NMUZQXVS7	US	35.47459	-97.505034	1524003	U OF OKLAHOMA HLTH SCI CTR		Non_Elite	female	100	OKLAHOMA CITY	OK	SCH ALLIED HEALTH PROFESSIONS	731043609	UNITED STATES	N	43709	44074	866	Other Research-Related	2019	124200	NIA	124200	coastal
NIEHS	9763574	43682	PA-16-193	5K99ES029537-02	5	K99	ES	29537	2		SHREFFLER, CAROL A	43344	43769	ZES1-LAT-D(K1)	12420986	3	VETERINARY SCIENCES	47120084	TX2DAGQPENZ5	47120084	TX2DAGQPENZ5	US	38.543366	-121.72946	577503	U OF CALIFORNIA AT DAVIS		Non_Elite	female	98	DAVIS	CA	SCHOOLS OF VETERINARY MEDICINE	956186153	UNITED STATES	N	43709	43769	113	Other Research-Related	2019	95507	NIEHS	95507	coastal
NINDS	9791018	43685	PA-18-398	5K99NS109286-02	5	K99	NS	109286	2		GUBITZ, AMELIE	43373	44196	NST-2 Study Section [NST-2]	10860483	3	PHYSIOLOGY	42250712	GM1XX56LEP58	42250712	GM1XX56LEP58	US	39.953462	-75.193983	6463801	U OF PENNSYLVANIA		Elite	female	54	PHILADELPHIA	PA	SCHOOLS OF MEDICINE	191046205	UNITED STATES	N	43678	44196	853	Other Research-Related	2019	80838	NINDS	80838	coastal
NICHD	9769071	43686	PA-16-193	5K99HD091386-02	5	K99	HD	91386	2		MUKHOPADHYAY, MAHUA	43344	43772	Developmental Biology Study Section[CHHD-C]	9539920	1	OTHER BASIC SCIENCES	68552207	L6NFUM28LQM5	68552207	L6NFUM28LQM5	US	38.664368	-90.323797	9083901	WASHINGTON U		Non_Elite	female	98	SAINT LOUIS	MO	SCHOOLS OF MEDICINE	631304862	UNITED STATES	N	43709	43772	865	Other Research-Related	2019	98736	NICHD	98736	#N/A
NIEHS	9764378	43690	PA-16-193	5K99ES028743-02	5	K99	ES	28743	2		GRAY, KIMBERLY A	43344	44074	ZES1-LAT-D(K1)	11930656	3	NONE	806345617	ED44Y3W6P7B9	806345617	ED44Y3W6P7B9	US	32.232844	-110.959467	490201	U OF ARIZONA		Non_Elite	female	98	TUCSON	AZ	SCHOOLS OF PUBLIC HEALTH	857210158	UNITED STATES	N	43709	44074	113	Other Research-Related	2019	81281	NIEHS	81281	coastal
NIMH	9748607	43690	PA-16-193	5K99MH117229-02	5	K99	MH	117229	2		VAN'T VEER, ASHLEE V	43313	44104	ZMH1-ERB-M(06)	10721658	8	Unavailable	73130411	FLJ7DQKLL226	73130411	FLJ7DQKLL226	US	42.363198	-71.068772	4907701	MASSACHUSETTS GENERAL HOSP		Elite	female	98	BOSTON	MA	Independent Hospitals	21142621	UNITED STATES	N	43678	44104	242	Other Research-Related	2019	131489	NIMH	131489	#N/A
NIAMS	9781369	43692	PA-16-193	5K99AR071508-02	5	K99	AR	71508	2		BOYCE, AMANDA T	43350	43844	Arthritis and Musculoskeletal and Skin Diseases Special Grants Study Section[AMS]	11842360	1	PEDIATRICS	183710748	NHV3GTWSALA7	183710748	NHV3GTWSALA7	US	32.786754	-79.947265	7575301	MED U OF SOUTH CAROLINA		Non_Elite	female	96	CHARLESTON	SC	SCHOOLS OF MEDICINE	294074636	UNITED STATES	N	43709	43844	846	Other Research-Related	2019	94716	NIAMS	94716	coastal
NCI	9780459	43693	PA-16-193	5K99CA226400-02	5	K99	CA	226400	2		SCHMIDT, MICHAEL K	43350	44012	ZCA1-RTRB-B(M1)	12628430	7	MISCELLANEOUS	1425594	E2NYLCDML6V1	1425594	E2NYLCDML6V1	US	42.359128	-71.093339	4911501	MASSACHUSETTS INST OF TECHNOLOGY		Elite	female	56	CAMBRIDGE	MA	ORGANIZED RESEARCH UNITS	21421029	UNITED STATES	N	43709	44012	398	Other Research-Related	2019	126225	NCI	126225	coastal
NIMH	9780588	43697	PA-18-398	5K99MH116064-02	5	K99	MH	116064	2		BECHTHOLT, ANITA J	43350	44074	ZMH1-ERB-M(07)	11330995	7	PSYCHIATRY	605799469	HD1WMN6945W6	605799469	HD1WMN6945W6	US	47.660307	-122.315168	9087701	U OF WASHINGTON		Elite	female	98	SEATTLE	WA	SCHOOLS OF MEDICINE	981959472	UNITED STATES	N	43709	44074	242	Other Research-Related	2019	127305	NIMH	127305	coastal
NIDDK	9780493	43699	PA-18-398	5K99DK119574-02	5	K99	DK	119574	2		SASLOWSKY, DAVID E	43350	43830	Digestive Diseases and Nutrition C Study Section[DDK-C]	11653510	3	BIOLOGY	42250712	GM1XX56LEP58	42250712	GM1XX56LEP58	US	39.953462	-75.193983	6463801	U OF PENNSYLVANIA		Elite	female	97	PHILADELPHIA	PA	SCHOOLS OF ARTS AND SCIENCES	191046205	UNITED STATES	N	43709	43830	847	Other Research-Related	2019	90000	NIDDK	90000	#N/A
NCI	9744115	43700	PA-18-398	1K99CA226353-01A1	1	K99	CA	226353	1	A	SCHMIDT, MICHAEL K	43709	44074	Transition to Independence Study Section (I)[NCI-I]	11097245	12	INTERNAL MEDICINE/MEDICINE	60217502	YNT8TCJH8FQ8	60217502	YNT8TCJH8FQ8	US	40.7607	-73.9603	1514803	WEILL MED COLL OF CORNELL U		Elite	female	74	NEW YORK	NY	SCHOOLS OF MEDICINE	100654805	UNITED STATES	N	43709	44074	398	Other Research-Related	2019	83988	NCI	83988	coastal
NICHD	9786806	43703	PA-16-193	5K99HD096057-02	5	K99	HD	96057	2		CHENG, CLARA M	43362	44074	Reproduction, Andrology, and Gynecology Study Section[CHHD-R]	12258544	9	PATHOLOGY	51113330	FXKMA43NTV21	51113330	FXKMA43NTV21	US	29.70926	-95.400851	481201	BAYLOR COLL OF MED		Non_Elite	female	98	HOUSTON	TX	SCHOOLS OF MEDICINE	770303411	UNITED STATES	N	43709	44074	865	Other Research-Related	2019	129955	NICHD	129955	coastal
[truncated: 2,496 more rows]
