# Supplementary material for: Analysis of NIH K99/R00 Awards and the Career Progression of Awardees
Source: bioRxiv preprint, doi:10.1101/2023.01.26.525751, version 16 (2023-12-29)
Supplement: Supplemental File 2 [file 525751_file13.csv]

Administering IC	Application ID	Award Notice Date	FOA	Project Number	Type	Activity	IC	Serial Number	Support Year	Suffix	Program Official Information	Project Start Date	Project End Date	Study Section	Contact PI Person ID	Congressional District	Department	Primary DUNS	Primary UEI	DUNS Number	UEI	FIPS	Latitude	Longitude	Organization ID (IPF)	Organization Name	Organization_FacNum	R00_code	ga_gender	ga_accuracy	Organization City	Organization State	Organization Type	Organization Zip	Organization Country	ARRA Indicator	Budget Start Date	Budget End Date	CFDA Code	Funding Mechanism	Fiscal Year	Total Cost	Funding IC(s)	Total Cost IC	coastal or not
NCI	8525706	9/14/12 0:00	PA-09-036	4R00CA140774-03	4	R00	CA	140774	3		HILDESHEIM, JEFFREY	5/1/10 0:00	8/31/15 0:00	NSS	8624472	5	BIOCHEMISTRY	65391526	JJG6HU8PA4S5	65391526	JJG6HU8PA4S5	US	38.050527	-78.500531	1526402	U OF VIRGINIA	2343	Non-Elite	male	99	CHARLOTTESVILLE	VA	SCHOOLS OF MEDICINE	229044195	UNITED STATES	N	9/14/12 0:00	8/31/13 0:00	396	Non-SBIR/STTR	2012	248999	NCI	235160	coastal
NIAID	10473006	##########	PA-18-398	4R00AI145762-03	4	R00	AI	145762	3		LAWRENCE, DIANE M	##########	##########	NSS	12299452	14	PATHOLOGY	800771149	MSPWVMXXMN76	800771149	MSPWVMXXMN76	US	29.311028	-94.778007	578406	U OF TEXAS MED BR GALVESTON		Non-Elite	male	99	GALVESTON	TX	SCHOOLS OF MEDICINE	775555302	UNITED STATES	N	9/20/21 0:00	##########	855	Non-SBIR/STTR	2021	251012	NIAID	190681	coastal
NIDCR	9700832	7/23/18 0:00	PA-16-193	4R00DE026807-02	4	R00	DE	26807	2		GHIM, MELISSA M	8/1/18 0:00	7/31/21 0:00	NSS	10330774	3	Unavailable	42250712	GM1XX56LEP58	42250712	GM1XX56LEP58	US	39.953462	-75.193983	6463801	U OF PENNSYLVANIA	1725	Elite	male	98	PHILADELPHIA	PA	Domestic Higher Education	191046205	UNITED STATES	N	8/1/18 0:00	7/31/19 0:00	121	Non-SBIR/STTR	2018	248804	NIDCR	205875	coastal
NIAID	9670918	5/31/18 0:00	PA-15-083	4R00AI125786-03	4	R00	AI	125786	3		RANALLO, RYAN	6/1/16 0:00	5/31/20 0:00	NSS	9616595	3	MICROBIOLOGY/IMMUN/VIROLOGY	42250712	GM1XX56LEP58	42250712	GM1XX56LEP58	US	39.953462	-75.193983	6463801	U OF PENNSYLVANIA		Elite	male	99	PHILADELPHIA	PA	SCHOOLS OF MEDICINE	191046205	UNITED STATES	N	6/1/18 0:00	5/31/19 0:00	855	Non-SBIR/STTR	2018	249000	NIAID	154658	#N/A
NHLBI	9172289	2/11/16 0:00	PA-11-197	4R00HL121284-03	4	R00	HL	121284	3		ADHIKARI, BISHOW B	12/20/13 0:00	1/31/19 0:00	NSS	11676241	3	PHYSIOLOGY	832127323	DLWBSLWAJWR1	832127323	DLWBSLWAJWR1	US	39.999598	-83.033131	6218701	OHIO STATE U	4414	Non-Elite	female	99	COLUMBUS	OH	SCHOOLS OF MEDICINE	432101016	UNITED STATES	N	2/15/16 0:00	1/31/17 0:00	837	Non-SBIR/STTR	2016	249000	NHLBI	161688	#N/A
NCI	8786918	5/23/14 0:00	PA-11-197	4R00CA172697-02	4	R00	CA	172697	2		MOHLA, SURESH	1/1/13 0:00	5/31/17 0:00	NSS	11264317	13	PATHOLOGY	621889815	QHF5ZZ114M72	621889815	QHF5ZZ114M72	US	40.8415	-73.9414	1833205	COLUMBIA U HEALTH SCI	3740	Elite	female	100	NEW YORK	NY	SCHOOLS OF MEDICINE	100323725	UNITED STATES	N	6/1/14 0:00	5/31/15 0:00	396	Non-SBIR/STTR	2014	241530	NCI	205155	coastal
NICHD	8049403	4/14/10 0:00	PA-07-297	4R00HD055446-03	4	R00	HD	55446	3		LAMAR, CHARISEE A	4/15/10 0:00	3/31/13 0:00	NSS	2687296	1	PHYSIOLOGY	804878247	M746VC6XMNH9	804878247	M746VC6XMNH9	US	40.914561	-73.125169	5992612	STATE U NEW YORK STONY BROOK		Non-Elite	unknown		STONY BROOK	NY	SCHOOLS OF MEDICINE	117943362	UNITED STATES	N	4/15/10 0:00	3/31/11 0:00	865	Non-SBIR/STTR	2010	249000	NICHD		#N/A
NICHD	9512122	7/31/17 0:00	PA-14-042	4R00HD079586-03	4	R00	HD	79586	3		BURES, REGINA M	7/31/17 0:00	5/31/18 0:00	NSS	1972116	4	PUBLIC HEALTH & PREV MEDICINE	608195277	D3LHU66KBLD5	608195277	D3LHU66KBLD5	US	35.9316	-79.057377	578206	U OF NORTH CAROLINA CHAPEL HILL	1644	Elite	female	97	CHAPEL HILL	NC	SCHOOLS OF PUBLIC HEALTH	275995023	UNITED STATES	N	7/31/17 0:00	5/31/18 0:00	865	Non-SBIR/STTR	2017	248991	NICHD	162055	coastal
NICHD	10652009	7/6/22	PA-19-130	4R00HD102567-03	4	R00	HD	102567	3		ESPOSITO, LAYLA E	7/1/22	6/30/25	ZHD1-SRC(99)	15357668	7	OTHER HEALTH PROFESSIONS	605799469	HD1WMN6945W6	605799469	HD1WMN6945W6	US	47.660307	-122.315168	9087701	U OF WASHINGTON	4000	Elite	female	81	SEATTLE	WA	SCHOOLS OF NURSING	981959472	UNITED STATES	N	7/1/22	6/30/23	865	Non-SBIR/STTR	2022	248884	NICHD	170615	coastal
NIMH	9415481	6/1/17 0:00	PA-14-042	4R00MH106649-03	4	R00	MH	106649	3		VICENTIC, ALEKSANDRA	6/1/17 0:00	3/31/20 0:00	NSS	11097443	33	PSYCHOLOGY	92530369	RN64EPNH8JC6	92530369	RN64EPNH8JC6	US	34.070199	-118.45102	577505	U OF CALIFORNIA LOS ANGELES	3481	Elite	male	100	LOS ANGELES	CA	SCHOOLS OF ARTS AND SCIENCES	900952000	UNITED STATES	N	6/1/17 0:00	3/31/18 0:00	242	Non-SBIR/STTR	2017	249000	NIMH	183591	#N/A
NIEHS	8413071	3/16/12 0:00		4R00ES017780-03	4	R00	ES	17780	3		HEINDEL, JERROLD	3/16/12 0:00	2/28/15 0:00	NSS	9749129	12	OBSTETRICS & GYNECOLOGY	94878337	KMH5K9V7S518	94878337	KMH5K9V7S518	US	37.767442	-122.413937	577508	U OF CALIFORNIA SAN FRANCISCO	2792	Elite	female	98	SAN FRANCISCO	CA	SCHOOLS OF MEDICINE	941432510	UNITED STATES	N	3/16/12 0:00	2/28/13 0:00	113	Non-SBIR/STTR	2012	248969	NIEHS	161145	coastal
NICHD	10203087	8/1/20 0:00	PA-16-193	4R00HD093798-03	4	R00	HD	93798	3		DAVIS, MAURICE	9/1/20 0:00	8/31/23 0:00	NSS	14656126	12	PUBLIC HEALTH & PREV MEDICINE	94878337	KMH5K9V7S518	94878337	KMH5K9V7S518	US	37.767442	-122.413937	577508	U OF CALIFORNIA SAN FRANCISCO		Elite	female	100	SAN FRANCISCO	CA	SCHOOLS OF MEDICINE	941432510	UNITED STATES	N	9/1/20 0:00	8/31/21 0:00	865	Non-SBIR/STTR	2020	248981	NICHD	159049	coastal
NCI	8869192	6/30/14 0:00	PA-10-063	4R00CA151670-03	4	R00	CA	151670	3		MUFSON, R ALLAN	4/1/10 0:00	6/30/17 0:00	NSS	9886789	3	Unavailable	96997515	NPSNT86JKN51	96997515	NPSNT86JKN51	US	45.49882	-122.685647	6297007	OREGON HEALTH & SCI U	1238	Non-Elite	female	98	PORTLAND	OR	Domestic Higher Education	972393098	UNITED STATES	N	7/1/14 0:00	6/30/15 0:00	396	Non-SBIR/STTR	2014	241470	NCI	156799	coastal
NIEHS	9476033	5/31/17 0:00	PA-15-083	4R00ES026620-02	4	R00	ES	26620	2		DZIERLENGA, ANIKA LIN	6/1/17 0:00	5/31/20 0:00	NSS	11694036	5	CHEMISTRY	97394084	EMW9FC8J3HN4	97394084	EMW9FC8J3HN4	US	33.781897	-84.404009	676603	GEORGIA INST OF TECHNOLOGY	839	Non-Elite	male	100	ATLANTA	GA	SCHOOLS OF ARTS AND SCIENCES	303320415	UNITED STATES	N	6/1/17 0:00	5/31/18 0:00	113	Non-SBIR/STTR	2017	249000	NIEHS	229161	#N/A
NHLBI	10445411	9/3/21 0:00	PA-18-398	4R00HL148542-03	4	R00	HL	148542	3		EVANS, FRANK	9/5/21 0:00	##########	NSS	14456975	52	ENGINEERING (ALL TYPES)	804355790	UYTTZT6G9DT1	804355790	UYTTZT6G9DT1	US	32.876991	-117.24087	577507	U OF CALIFORNIA SAN DIEGO	2482	Elite	male	99	LA JOLLA	CA	SCHOOLS OF ARTS AND SCIENCES	920930621	UNITED STATES	N	9/5/21 0:00	##########	837	Non-SBIR/STTR	2021	248997	NHLBI	201203	coastal
NIAAA	8990622	2/10/15 0:00	PA-11-197	4R00AA021264-03	4	R00	AA	21264	3		JUNG, KATHY	2/15/13 0:00	1/31/18 0:00	NSS	10367924	26	MICROBIOLOGY/IMMUN/VIROLOGY	71298814	Q3KCVK5S9CP1	71298814	Q3KCVK5S9CP1	US	25.761055	-80.376195	513809	FLORIDA INTERNATIONAL U	951	Non-Elite	female	100	MIAMI	FL	SCHOOLS OF MEDICINE	331992516	UNITED STATES	N	2/1/15 0:00	1/31/16 0:00	273	Non-SBIR/STTR	2015	248588	NIAAA	171440	coastal
NIA	10661885	8/15/22	PA-18-398	4R00AG061251-03	4	R00	AG	61251	3		MACKIEWICZ, MIROSLAW	8/15/22	7/31/25	ZAG1-SRC(99)	15299263	7	NEUROLOGY	63690705	YND4PLMC9AN7	63690705	YND4PLMC9AN7	US	33.50591	-86.799772	1288803	U OF ALABAMA AT BIRMINGHAM	2329	Non-Elite	male	89	BIRMINGHAM	AL	SCHOOLS OF MEDICINE	352940001	UNITED STATES	N	8/15/22	7/31/23	866	Non-SBIR/STTR	2022	249000	NIA	167677	coastal
NINDS	7991100	11/30/09 0:00	PA-06-133	4R00NS057944-03	4	R00	NS	57944	3		UTZ, URSULA	6/1/07 0:00	12/31/12 0:00	NSS	7869092	1	PHARMACOLOGY	804878247	M746VC6XMNH9	804878247	M746VC6XMNH9	US	40.914561	-73.125169	5992612	STATE U NEW YORK STONY BROOK		Non-Elite	male	99	STONY BROOK	NY	SCHOOLS OF MEDICINE	117943362	UNITED STATES	N	1/1/10 0:00	12/31/10 0:00	853	Non-SBIR/STTR	2010	249000	NINDS		#N/A
NCI	8714430	8/23/13 0:00	PA-11-197	4R00CA160775-02	4	R00	CA	160775	2		DASCHNER, PHILLIP J	9/1/13 0:00	8/31/16 0:00	NSS	10679666	1	SURGERY	5421136	ZUE9HKT2CLC9	5421136	ZUE9HKT2CLC9	US	41.789554	-87.601172	1413601	U OF CHICAGO	1949	Elite	male	98	CHICAGO	IL	SCHOOLS OF MEDICINE	606372612	UNITED STATES	N	9/1/13 0:00	8/31/14 0:00	393	Non-SBIR/STTR	2013	233998	NCI	148100	coastal
NIDCD	7797099	7/29/09 0:00	PA-09-036	4R00DC009287-02	4	R00	DC	9287	2		SKLARE, DAN	11/14/07 0:00	7/31/12 0:00	NSS	8921410	1	Unavailable	71284913	JZD1HLM2ZU83	71284913	JZD1HLM2ZU83	US	39.140663	-84.501007	615001	CINCINNATI CHILDRENS HOSP MED CTR		Non-Elite	male	99	CINCINNATI	OH	Independent Hospitals	452293039	UNITED STATES	N	8/1/09 0:00	7/31/10 0:00	173	Non-SBIR/STTR	2009	249001	NIDCD		#N/A
NIA	10545896	4/14/22	PA-19-130	4R00AG064143-03	4	R00	AG	64143	3		BOYCE, AMANDA T	2/15/20	1/31/25	NSS	14925969	6	INTERNAL MEDICINE/MEDICINE	937727907	SN7KD2UK7GC5	937727907	SN7KD2UK7GC5	US	36.059402	-80.321981	9021205	WAKE FOREST U HEALTH SCI	1709	Non-Elite	male	100	WINSTON-SALEM	NC	SCHOOLS OF MEDICINE	271570001	UNITED STATES	N	4/15/22	1/31/23	866	Non-SBIR/STTR	2022	249000	NIA	160645	coastal
NIMH	8309570	8/22/11 0:00		4R00MH082109-03	4	R00	MH	82109	3		ASANUMA, CHIIKO	9/1/11 0:00	6/30/14 0:00	NSS	8832246	7	BIOCHEMISTRY	605799469	HD1WMN6945W6	605799469	HD1WMN6945W6	US	47.660307	-122.315168	9087701	U OF WASHINGTON		Elite	male	99	SEATTLE	WA	SCHOOLS OF MEDICINE	981959472	UNITED STATES	N	9/1/11 0:00	6/30/12 0:00	242	Non-SBIR/STTR	2011	249000	NIMH		#N/A
NIA	8843589	6/6/14 0:00	PA-11-197	4R00AG039528-03	4	R00	AG	39528	3		HAAGA, JOHN G	6/15/14 0:00	5/31/17 0:00	NSS	7831054	37	Unavailable	72933393	G88KLJR3KYT5	72933393	G88KLJR3KYT5	US	34.017282	-118.281254	7636101	U OF SOUTHERN CALIFORNIA	2232	Non-Elite	female	98	Los Angeles	CA	Domestic Higher Education	900894304	UNITED STATES	N	6/15/14 0:00	5/31/15 0:00	866	Non-SBIR/STTR	2014	248997	NIA	153302	coastal
NCI	9387759	1/25/17 0:00	PA-14-042	4R00CA194309-03	4	R00	CA	194309	3		SPALHOLZ, BARBARA A	1/25/17 0:00	11/30/19 0:00	NSS	11498863	10	PHYSIOLOGY	129348186	TNKGNDAWB445	129348186	TNKGNDAWB445	US	40.264414	-76.674014	1524204	PENNSYLVANIA STATE	5280	Non-Elite	female	99	HERSHEY	PA	SCHOOLS OF MEDICINE	170332360	UNITED STATES	N	1/25/17 0:00	11/30/17 0:00	396	Non-SBIR/STTR	2017	249000	NCI	178139	coastal
NIDDK	9051452	7/28/15 0:00	PA-11-197	4R00DK099434-03	4	R00	DK	99434	3		RASOOLY, REBEKAH S	8/1/15 0:00	7/31/18 0:00	NSS	11591538	18	PEDIATRICS	4514360	MKAGLD59JRL1	4514360	MKAGLD59JRL1	US	40.440909	-79.959125	2059802	U OF PITTSBURGH AT PITTSBURGH	3809	Elite	male	100	PITTSBURGH	PA	SCHOOLS OF MEDICINE	152133320	UNITED STATES	N	8/1/15 0:00	7/31/16 0:00	847	Non-SBIR/STTR	2015	249000	NIDDK	165195	coastal
NHLBI	8848174	8/21/15 0:00	PA-10-063	4R00HL111410-03	4	R00	HL	111410	3		DANTHI, NARASIMHAN	6/1/12 0:00	8/31/18 0:00	NSS	10663512	5	ENGINEERING (ALL TYPES)	555917996	KABJZBBJ4B54	555917996	KABJZBBJ4B54	US	44.975143	-93.227003	1450402	U OF MINNESOTA	3254	Non-Elite	male	93	MINNEAPOLIS	MN	BIOMED ENGR/COL ENGR/ENGR STA	554552070	UNITED STATES	N	9/1/15 0:00	8/31/16 0:00	837	Non-SBIR/STTR	2015	248971	NHLBI	163797	#N/A
NIMH	8587513	1/17/13 0:00	PA-11-197	4R00MH090237-03	4	R00	MH	90237	3		ASANUMA, CHIIKO	1/17/13 0:00	12/31/15 0:00	NSS	6439665	3	BIOLOGY	2604817	XF3XM9642N96	2604817	XF3XM9642N96	US	39.954073	-75.186541	2205901	DREXEL U	631	Non-Elite	male	99	PHILADELPHIA	PA	SCHOOLS OF ARTS AND SCIENCES	191043735	UNITED STATES	N	1/17/13 0:00	12/31/13 0:00	242	Non-SBIR/STTR	2013	249000	NIMH	161165	coastal
NIDA	9941235	3/20/20 0:00	PA-16-193	4R00DA043011-04	4	R00	DA	43011	4		MANDLER, RAUL N	4/1/20 0:00	3/31/23 0:00	NSS	14370019	14	Unavailable	81266487	H6N1ZF5HJ2G3	81266487	H6N1ZF5HJ2G3	US	40.85103	-73.844379	10053556	ALBERT EINSTEIN COLL OF MED	41	Non-Elite	male	100	BRONX	NY	Domestic Higher Education	104611900	UNITED STATES	N	4/1/20 0:00	3/31/21 0:00	279	Non-SBIR/STTR	2020	249000	NIDA	148546	coastal
NIAMS	8816308	7/30/14 0:00	PA-11-197	4R00AR063228-03	4	R00	AR	63228	3		TSENG, HUNG H	8/1/14 0:00	7/31/17 0:00	NSS	10503505	2	DERMATOLOGY	57123192	QD4MGHFDJKU1	57123192	QD4MGHFDJKU1	US	39.980272	-75.157051	8240301	TEMPLE U OF THE COMMONWEALTH	2192	Non-Elite	male	98	PHILADELPHIA	PA	SCHOOLS OF MEDICINE	191226003	UNITED STATES	N	8/1/14 0:00	7/31/15 0:00	846	Non-SBIR/STTR	2014	249000	NIAMS	166259	coastal
NIGMS	8305329	9/1/11 0:00	PA-06-133	4R00GM084292-03	4	R00	GM	84292	3		FLICKER, PAULA F	4/1/08 0:00	8/31/14 0:00	NSS	9105946	3	ANATOMY/CELL BIOLOGY	47120084	TX2DAGQPENZ5	47120084	TX2DAGQPENZ5	US	38.543366	-121.72946	577503	U OF CALIFORNIA AT DAVIS	2386	Non-Elite	male	89	DAVIS	CA	SCHOOLS OF ARTS AND SCIENCES	956186153	UNITED STATES	N	9/1/11 0:00	8/31/12 0:00	859	Non-SBIR/STTR	2011	246132	NIGMS		coastal
NIDA	9449554	8/23/17 0:00	PA-14-042	4R00DA038725-03	4	R00	DA	38725	3		SORENSEN, ROGER	9/1/17 0:00	8/31/20 0:00	NSS	11232592	1	PHARMACOLOGY	75892844	NMMKG6CCEMW4	75892844	NMMKG6CCEMW4	US	38.637418	-90.261998	7907801	ST LOUIS COLL OF PHARMACY		Non-Elite	female	74	St. Louis	MO	SCHOOLS OF PHARMACY	63110	UNITED STATES	N	9/1/17 0:00	8/31/18 0:00	279	Non-SBIR/STTR	2017	249000	NIDA	190259	#N/A
NHLBI	8307087	8/26/11 0:00		4R00HL094706-03	4	R00	HL	94706	3		SARKAR, RITA	9/1/11 0:00	7/31/14 0:00	NSS	9180159	7	Unavailable	79532263	MY2ERHGDV956	79532263	MY2ERHGDV956	US	42.349512	-71.063308	130301	TUFTS MED CTR	761	Non-Elite	male	99	BOSTON	MA	Independent Hospitals	21111552	UNITED STATES	N	9/1/11 0:00	7/31/12 0:00	837	Non-SBIR/STTR	2011	249000	NHLBI		coastal
NHLBI	8803454	3/7/14 0:00	PA-11-197	4R00HL113105-03	4	R00	HL	113105	3		TIGNO, XENIA	7/1/14 0:00	6/30/17 0:00	NSS	9337653	3	PHYSIOLOGY	9094012	JWSYC7RUMJD1	9094012	JWSYC7RUMJD1	US	40.226908	-111.6914	951901	BRIGHAM YOUNG U	1254	Non-Elite	male	99	PROVO	UT	SCHOOLS OF ARTS AND SCIENCES	846021231	UNITED STATES	N	7/1/14 0:00	6/30/15 0:00	837	Non-SBIR/STTR	2014	249000	NHLBI	179333	coastal
NIEHS	9738217	9/20/18 0:00	PA-16-193	4R00ES027853-03	4	R00	ES	27853	3		DZIERLENGA, ANIKA LIN	9/20/18 0:00	8/31/21 0:00	NSS	10751153	2	PHYSIOLOGY	7431505	SPVKK1RC2MZ3	7431505	SPVKK1RC2MZ3	US	40.013296	-105.251932	1199902	U OF COLORADO	1242	Non-Elite	female	98	Boulder	CO	SCHOOLS OF ARTS AND SCIENCES	803031058	UNITED STATES	N	9/20/18 0:00	8/31/19 0:00	113	Non-SBIR/STTR	2018	248295	NIEHS	167735	#N/A
NINR	7813566	8/6/09 0:00	PA-09-036	4R00NR010495-03	4	R00	NR	10495	3		BOYINGTON, JOSEPHINE	8/6/09 0:00	6/30/12 0:00	NSS	8648040	13	INTERNAL MEDICINE/MEDICINE	78861598	C8H9CNG1VBD9	78861598	C8H9CNG1VBD9	US	40.790284	-73.946781	3839801	ICAHN SCH OF MED AT MOUNT SINAI	3044	Non-Elite	female	98	NEW YORK	NY	SCHOOLS OF MEDICINE	100296574	UNITED STATES	N	8/6/09 0:00	6/30/10 0:00	361	Non-SBIR/STTR	2009	212750	NINR		coastal
NIDDK	7842017	9/4/09 0:00	PA-09-036	4R00DK080774-02	4	R00	DK	80774	2		RYS-SIKORA, KRYSTYNA E	9/25/08 0:00	8/31/12 0:00	NSS	8924186	6	PHARMACOLOGY	1912864	M1LVPE5GLSD9	1912864	M1LVPE5GLSD9	US	40.481906	-74.457066	1196203	RUTGERS THE STATE U OF NJ	554	Non-Elite	female	97	PISCATAWAY	NJ	SCHOOLS OF PHARMACY	88543925	UNITED STATES	N	9/1/09 0:00	8/31/10 0:00	847	Non-SBIR/STTR	2009	235251	NIDDK		#N/A
NIDDK	10064373	1/30/20 0:00	PA-18-398	4R00DK119574-03	4	R00	DK	119574	3		SHEA-DONOHUE, TEREZ	2/1/20 0:00	12/31/22 0:00	NSS	11653510	3	Unavailable	88812565	DJCTQA1PR7Q4	88812565	DJCTQA1PR7Q4	US	39.955743	-75.193059	1380701	MONELL CHEMICAL SENSES CTR		Non-Elite	female	97	PHILADELPHIA	PA	Research Institutes	191043308	UNITED STATES	N	2/1/20 0:00	12/31/20 0:00	847	Non-SBIR/STTR	2020	249000	NIDDK	187606	#N/A
NHLBI	8529685	8/21/12 0:00	PA-11-197	4R00HL109256-02	4	R00	HL	109256	2		GALIS, ZORINA S	8/1/11 0:00	5/31/15 0:00	NSS	10669488	13	INTERNAL MEDICINE/MEDICINE	621889815	QHF5ZZ114M72	621889815	QHF5ZZ114M72	US	40.8415	-73.9414	1833205	COLUMBIA U HEALTH SCI		Elite	male	98	NEW YORK	NY	SCHOOLS OF MEDICINE	100323725	UNITED STATES	N	9/1/12 0:00	5/31/13 0:00	837	Non-SBIR/STTR	2012	249000	NHLBI	155625	#N/A
NIEHS	8533199	11/26/12 0:00		4R00ES020353-02	4	R00	ES	20353	2		SHAUGHNESSY, DANIEL	12/1/12 0:00	11/30/15 0:00	NSS	10658400	33	SOCIAL SCIENCES	92530369	RN64EPNH8JC6	92530369	RN64EPNH8JC6	US	34.070199	-118.45102	577505	U OF CALIFORNIA LOS ANGELES		Elite	male	99	LOS ANGELES	CA	SCHOOLS OF ARTS AND SCIENCES	900952000	UNITED STATES	N	12/1/12 0:00	11/30/13 0:00	113	Non-SBIR/STTR	2013	249000	NIEHS	232832	coastal
NCCIH	8313402	9/13/11 0:00	PA-07-297	4R00AT004711-03	4	R00	AT	4711	3		GLOWA, JOHN R	5/1/09 0:00	4/30/14 0:00	ZAT1-LD(28)	8307635	1	Unavailable	55652309	MLX6WJND8VB1	55652309	MLX6WJND8VB1	US	47.730202	-122.251362	1604501	BASTYR U		Non-Elite	male	99	KENMORE	WA	Domestic Higher Education	980284966	UNITED STATES	N	9/30/11 0:00	4/30/12 0:00	213	Non-SBIR/STTR	2011	248996	NCCIH		#N/A
NIAMS	8325233	9/7/11 0:00	PA-07-097	4R00AR057426-03	4	R00	AR	57426	3		MAO, SU-YAU	9/7/11 0:00	8/31/14 0:00	NSS	8699615	3	BIOMEDICAL ENGINEERING	969663814	NNFQH1JAPEP3	969663814	NNFQH1JAPEP3	US	29.643443	-82.349637	513806	U OF FLORIDA	2358	Non-Elite	male	98	GAINESVILLE	FL	BIOMED ENGR/COL ENGR/ENGR STA	326115500	UNITED STATES	N	9/7/11 0:00	8/31/12 0:00	846	Non-SBIR/STTR	2011	249000	NIAMS		#N/A
NIBIB	7515492	12/17/07 0:00	PA-06-133	4R00EB007129-02	4	R00	EB	7129	2		LIU, GUOYING	1/1/08 0:00	12/31/10 0:00	NSS	2093879	13	CHEMISTRY	1962224	M6K6NTJ2MNE5	1962224	M6K6NTJ2MNE5	US	42.357466	-83.065294	9110501	WAYNE STATE U	1314	Non-Elite	male	100	DETROIT	MI	SCHOOLS OF ARTS AND SCIENCES	482024000	UNITED STATES	N	1/1/08 0:00	12/31/08 0:00	286	Non-SBIR/STTR	2008	248998	NIBIB		#N/A
NICHD	8658200	9/5/13 0:00	PA-07-297	4R00HD058698-03	4	R00	HD	58698	3		KAU, ALICE S	9/5/13 0:00	8/31/16 0:00	NSS	9234679	8	Unavailable	193247145	R28EKN92ZTZ9	193247145	R28EKN92ZTZ9	US	42.653979	-84.492032	5245901	MICHIGAN STATE U	2551	Non-Elite	female	98	EAST LANSING	MI	Domestic Higher Education	488242600	UNITED STATES	N	9/5/13 0:00	8/31/14 0:00	865	Non-SBIR/STTR	2013	248938	NICHD	166035	coastal
NIDDK	8066818	6/11/10 0:00		4R00DK081350-02	4	R00	DK	81350	2		MCKEON, CATHERINE T	7/1/10 0:00	6/30/13 0:00	NSS	8501321	6	BIOCHEMISTRY	937727907	SN7KD2UK7GC5	937727907	SN7KD2UK7GC5	US	36.059402	-80.321981	9021205	WAKE FOREST U HEALTH SCI		Non-Elite	female	98	WINSTON-SALEM	NC	SCHOOLS OF MEDICINE	271570001	UNITED STATES	N	7/1/10 0:00	6/30/11 0:00	847	Non-SBIR/STTR	2010	245400	NIDDK		#N/A
NCCIH	9761713	8/31/18 0:00	PA-15-083	4R00AT009156-03	4	R00	AT	9156	3		BELFER, INNA	5/1/16 0:00	8/31/21 0:00	ZDA1-HXO-H(01)S	11472927	8	PUBLIC HEALTH & PREV MEDICINE	193247145	R28EKN92ZTZ9	193247145	R28EKN92ZTZ9	US	42.653979	-84.492032	5245901	MICHIGAN STATE U		Non-Elite	female	97	EAST LANSING	MI	SCHOOLS OF MEDICINE	488242600	UNITED STATES	N	9/1/18 0:00	8/31/19 0:00	213	Other Research-Related	2018	249000	NCCIH	160645	coastal
NIAID	7558352	5/5/08 0:00		4R00AI072973-02	4	R00	AI	72973	2		SHARMA, OPENDRA K	12/1/06 0:00	4/30/10 0:00	NSS	8592666	8	Unavailable	73130411	FLJ7DQKLL226	73130411	FLJ7DQKLL226	US	42.363198	-71.068772	4907701	MASSACHUSETTS GENERAL HOSP		Elite	female	97	BOSTON	MA	Independent Hospitals	21142621	UNITED STATES	N	5/15/08 0:00	4/30/09 0:00	855	Non-SBIR/STTR	2008	249000	NIAID		#N/A
NLM	8123728	9/6/10 0:00	PA-07-297	4R00LM009826-03	4	R00	LM	9826	3		YE, JANE	9/30/08 0:00	9/29/13 0:00	Biomedical Informatics, Library and Data Sciences Review Committee[BLR]	8802789	7	Unavailable	76593722	Z1L9F1MM1RY3	76593722	Z1L9F1MM1RY3	US	42.337481	-71.104964	1504801	BOSTON CHILDRENS HOSP		Elite	male	91	BOSTON	MA	Independent Hospitals	21155724	UNITED STATES	N	9/30/10 0:00	9/29/11 0:00	879	Non-SBIR/STTR	2010	249000	NLM		coastal
NCI	9752816	8/27/18 0:00	PA-16-285	4R00CA204593-03	4	R00	CA	204593	3		WATSON, JOANNA M	8/1/16 0:00	8/31/21 0:00	NSS	11479021	25	GENETICS	41294109	F27KDXZMF9Y8	41294109	F27KDXZMF9Y8	US	43.131774	-77.63546	7047101	U OF ROCHESTER	2149	Non-Elite	male	99	ROCHESTER	NY	SCHOOL OF MEDICINE & DENTISTRY	146270140	UNITED STATES	N	9/1/18 0:00	8/31/19 0:00	395	Non-SBIR/STTR	2018	249000	NCI	161688	coastal
NHLBI	8598651	2/22/13 0:00	PA-09-036	4R00HL103786-03	4	R00	HL	103786	3		TIGNO, XENIA	3/1/13 0:00	2/28/16 0:00	NSS	11723176	2	Unavailable	9095365	LL8GLEVH6MG3	9095365	LL8GLEVH6MG3	US	40.764542	-111.850317	514002	U OF UTAH	1893	Non-Elite	male	99	SALT LAKE CITY	UT	Domestic Higher Education	841128906	UNITED STATES	N	3/1/13 0:00	2/28/14 0:00	837	Non-SBIR/STTR	2013	248514	NHLBI	166555	coastal
NCI	8928274	9/22/14 0:00	PA-10-063	4R00CA157954-03	4	R00	CA	157954	3		HILDESHEIM, JEFFREY	9/22/14 0:00	8/31/17 0:00	NSS	8921940	4	DENTISTRY	608195277	D3LHU66KBLD5	608195277	D3LHU66KBLD5	US	35.9316	-79.057377	578206	U OF NORTH CAROLINA CHAPEL HILL		Elite	male	99	CHAPEL HILL	NC	SCHOOLS OF DENTISTRY/ORAL HYGN	275995023	UNITED STATES	N	9/22/14 0:00	8/31/15 0:00	396	Non-SBIR/STTR	2014	241531	NCI	158902	#N/A
NIDCR	9479426	6/16/17 0:00	PA-14-042	4R00DE023826-03	4	R00	DE	23826	3		WANG, CHIAYENG	3/1/17 0:00	2/28/20 0:00	NSS	10687948	7	DENTISTRY	63690705	YND4PLMC9AN7	63690705	YND4PLMC9AN7	US	33.50591	-86.799772	1288803	U OF ALABAMA AT BIRMINGHAM		Non-Elite	female	100	BIRMINGHAM	AL	SCHOOLS OF DENTISTRY/ORAL HYGN	352940001	UNITED STATES	N	3/1/17 0:00	2/28/18 0:00	121	Non-SBIR/STTR	2017	245799	NIDCR	167677	coastal
NIMH	9905429	8/15/19 0:00	PA-18-906	3R00MH108719-03S1	3	R00	MH	108719	3	S	NADLER, LAURIE S	9/1/19 0:00	8/31/21 0:00		12550044	13	PSYCHIATRY	621889815	QHF5ZZ114M72	621889815	QHF5ZZ114M72	US	40.8415	-73.9414	1833205	COLUMBIA U HEALTH SCI		Elite	male	99	NEW YORK	NY	SCHOOLS OF MEDICINE	100323725	UNITED STATES	N	9/1/19 0:00	8/31/21 0:00	242	Non-SBIR/STTR	2019	22447	NIMH	17347	coastal
NIMH	9376803	1/1/17 0:00	PA-11-197	4R00MH103399-03	4	R00	MH	103399	3		VICENTIC, ALEKSANDRA	1/1/17 0:00	12/31/19 0:00	NSS	11212694	2	NEUROSCIENCES	603847393	MQE2JHHJW9Q8	603847393	MQE2JHHJW9Q8	US	42.2802	-71.758245	850903	U OF MASSACHUSETTS MED SCH WORCESTER	976	Non-Elite	female	97	WORCESTER	MA	SCHOOLS OF MEDICINE	16550002	UNITED STATES	N	1/1/17 0:00	12/31/17 0:00	242	Non-SBIR/STTR	2017	248999	NIMH	198828	#N/A
NHLBI	8828397	4/30/14 0:00	PA-11-197	4R00HL112962-03	4	R00	HL	112962	3		GALIS, ZORINA S	5/1/14 0:00	4/30/17 0:00	NSS	10267748	3	ANATOMY/CELL BIOLOGY	96997515	NPSNT86JKN51	96997515	NPSNT86JKN51	US	45.49882	-122.685647	6297007	OREGON HEALTH & SCI U		Non-Elite	male	99	PORTLAND	OR	SCHOOLS OF MEDICINE	972393098	UNITED STATES	N	5/1/14 0:00	4/30/15 0:00	837	Non-SBIR/STTR	2014	249000	NHLBI	168701	coastal
NIDA	8937072	5/18/15 0:00	PA-11-197	4R00DA033374-03	4	R00	DA	33374	3		LYNCH, MINDA	12/1/14 0:00	5/31/18 0:00	NSS	8614202	14	PHARMACOLOGY	800771149	MSPWVMXXMN76	800771149	MSPWVMXXMN76	US	29.311028	-94.778007	578406	U OF TEXAS MED BR GALVESTON		Non-Elite	female	99	GALVESTON	TX	SCHOOLS OF MEDICINE	775555302	UNITED STATES	N	6/1/15 0:00	5/31/16 0:00	279	Non-SBIR/STTR	2015	249000	NIDA	160645	#N/A
NCI	9274487	7/1/16 0:00	PA-11-197	4R00CA178206-03	4	R00	CA	178206	3		STRASBURGER, JENNIFER	9/1/13 0:00	6/30/19 0:00	NSS	10300099	2	Unavailable	42140483	XR6LMXNKDJJ1	42140483	XR6LMXNKDJJ1	US	44.365361	-68.196303	7096501	JACKSON lab		Non-Elite	female	98	BAR HARBOR	ME	Research Institutes	46091523	UNITED STATES	N	7/1/16 0:00	6/30/17 0:00	396	Non-SBIR/STTR	2016	249000	NCI	131746	#N/A
NIEHS	8969395	1/7/15 0:00	PA-11-197	4R00ES022631-03	4	R00	ES	22631	3		DILWORTH, CAROLINE H	1/7/15 0:00	12/31/17 0:00	NSS	11396140	4	PUBLIC HEALTH & PREV MEDICINE	785979618	LT9CXX8L19G1	785979618	LT9CXX8L19G1	US	40.57951	-105.081267	1725201	COLORADO STATE U	1245	Non-Elite	female	97	FORT COLLINS	CO	SCHOOLS OF VETERINARY MEDICINE	805232002	UNITED STATES	N	1/7/15 0:00	12/31/15 0:00	113	Non-SBIR/STTR	2015	241682	NIEHS	162998	#N/A
NIA	9140448	9/15/15 0:00	PA-11-197	4R00AG042458-03	4	R00	AG	42458	3		JOSEPH, LYNDON	9/30/15 0:00	5/31/18 0:00	NSS	8838835	7	Unavailable	71723621	C1CPANL3EWK4	71723621	C1CPANL3EWK4	US	42.33982	-71.10568	758101	BETH ISRAEL DEACONESS MED CTR		Elite	male	99	BOSTON	MA	Independent Hospitals	22155400	UNITED STATES	N	9/30/15 0:00	5/31/16 0:00	866	Non-SBIR/STTR	2015	249000	NIA	149483	coastal
NIGMS	8895472	8/18/14 0:00	PA-10-063	4R00GM100008-03	4	R00	GM	100008	3		ANDERSON, VERNON	2/2/12 0:00	7/31/17 0:00	NSS	9830077	12	CHEMISTRY	2484665	NJ1YPQXQG7U5	2484665	NJ1YPQXQG7U5	US	40.345441	-74.655866	6661401	PRINCETON U	799	Elite	female	93	Princeton	NJ	SCHOOLS OF ARTS AND SCIENCES	85406000	UNITED STATES	N	9/1/14 0:00	7/31/15 0:00	859	Non-SBIR/STTR	2014	249000	NIGMS	165185	coastal
NCI	9969652	9/10/19 0:00	PA-16-193	4R00CA215256-03	4	R00	CA	215256	3		LI, JERRY	3/1/17 0:00	7/31/22 0:00	NSS	12597628	14	Unavailable	139301956	DVHKP4N619V9	139301956	DVHKP4N619V9	US	28.062583	-82.419596	3736101	H LEE MOFFITT CANCER CTR & RES INST		Non-Elite	female	99	TAMPA	FL	Research Institutes	336129497	UNITED STATES	N	9/10/19 0:00	7/31/20 0:00	396	Non-SBIR/STTR	2019	248929	NCI	151005	#N/A
NIMH	9121075	9/21/15 0:00	PA-11-197	4R00MH099405-03	4	R00	MH	99405	3		NADLER, LAURIE S	9/18/15 0:00	6/30/18 0:00	NSS	10312665	1	BIOLOGY	111089470	GBNGC495XA67	111089470	GBNGC495XA67	US	43.1304	-70.9767	830102	U OF NEW HAMPSHIRE	579	Non-Elite	male	99	DURHAM	NH	EARTH SCIENCES/RESOURCES	38242620	UNITED STATES	N	9/18/15 0:00	6/30/16 0:00	242	Non-SBIR/STTR	2015	249000	NIMH	196130	coastal
NIMH	10509424	1/17/22	RFA-NS-19-043	4R00MH125329-03	4	R00	MH	125329	3		PANCHISION, DAVID M	1/18/22	12/31/24	NSS	11378275	9	ENGINEERING (ALL TYPES)	943360412	NTLHJXM55KZ6	943360412	NTLHJXM55KZ6	US	33.423954	-111.940687	488301	ARIZONA STATE U TEMPE CAMPUS	2263	Non-Elite	female	98	TEMPE	AZ	BIOMED ENGR/COL ENGR/ENGR STA	852876011	UNITED STATES	N	1/18/22	12/31/22	242	Non-SBIR/STTR	2022	248999	NIMH	176751	coastal
NCI	8115519	9/20/10 0:00	PA-10-063	4R00CA131489-03	4	R00	CA	131489	3		FORRY, SUZANNE L	9/12/08 0:00	8/31/13 0:00	NSS	8770854	5	BIOLOGY	837322494	MNS7B9CVKDN7	837322494	MNS7B9CVKDN7	US	33.753531	-84.384483	676604	GEORGIA STATE U	858	Non-Elite	female	90	ATLANTA	GA	SCHOOLS OF ARTS AND SCIENCES	303023999	UNITED STATES	N	9/21/10 0:00	8/31/11 0:00	394	Non-SBIR/STTR	2010	248999	NCI		#N/A
NIMH	8119254	9/13/10 0:00	PA-10-063	4R00MH083044-03	4	R00	MH	83044	3		PANCHISION, DAVID M	9/30/08 0:00	5/31/13 0:00	NSS	9107599	13	Unavailable	167204994	TYVNMW8FNQQ3	167204994	TYVNMW8FNQQ3	US	40.843076	-73.944206	1590919	NEW_YORK_STATE_PSY		Non-Elite	male	100	NEW YORK	NY	Independent Hospitals	100321007	UNITED STATES	N	9/1/10 0:00	5/31/11 0:00	242	Non-SBIR/STTR	2010	249000	NIMH		#N/A
NINDS	7680906	9/15/08 0:00		4R00NS060983-02	4	R00	NS	60983	2		PORTER, JOHN D	9/16/08 0:00	8/31/11 0:00	NSS	8850582	12	GENETICS	73133571	GNJ7BBP73WE9	73133571	GNJ7BBP73WE9	US	42.275494	-83.743038	1506502	U OF MICHIGAN AT ANN ARBOR	4273	Elite	male	99	ANN ARBOR	MI	SCHOOLS OF MEDICINE	481091276	UNITED STATES	N	9/16/08 0:00	8/31/09 0:00	853	Non-SBIR/STTR	2008	247429	NINDS		#N/A
NICHD	9445511	7/24/17 0:00	PA-11-197	4R00HD078483-03	4	R00	HD	78483	3		FREUND, LISA S	8/1/17 0:00	7/31/20 0:00	NSS	11694866	22	NONE	4147534	Q266L2NDAVP1	4147534	Q266L2NDAVP1	US	26.376257	-80.114172	513803	FLORIDA ATLANTIC U	659	Non-Elite	female	99	BOCA RATON	FL	SCHOOLS OF ARTS AND SCIENCES	334316424	UNITED STATES	N	8/1/17 0:00	7/31/18 0:00	865	Non-SBIR/STTR	2017	248904	NICHD	187880	#N/A
NIMH	9171969	2/24/16 0:00	PA-11-197	4R00MH103531-03	4	R00	MH	103531	3		ASANUMA, CHIIKO	2/24/16 0:00	12/31/18 0:00	NSS	10568106	6	PHARMACOLOGY	41096314	MW8JHK6ZYEX8	41096314	MW8JHK6ZYEX8	US	39.745098	-104.837605	1199905	U OF COLORADO DENVER	2871	Non-Elite	male	99	Aurora	CO	SCHOOLS OF MEDICINE	800452570	UNITED STATES	N	2/24/16 0:00	12/31/16 0:00	242	Non-SBIR/STTR	2016	248831	NIMH	160020	#N/A
NINDS	9441065	3/21/17 0:00	PA-14-042	4R00NS089859-03	4	R00	NS	89859	3		MORRIS, JILL A	4/1/17 0:00	3/31/20 0:00	NSS	11837443	3	Unavailable	73757627	G7MQPLSUX1L4	73757627	G7MQPLSUX1L4	US	39.946632	-75.196604	1499101	CHILDRENS HOSP OF PHILADELPHIA		Elite	male	67	PHILADELPHIA	PA	Independent Hospitals	191462305	UNITED STATES	N	4/1/17 0:00	3/31/18 0:00	853	Non-SBIR/STTR	2017	248934	NINDS	148175	coastal
NCI	10668542	8/24/22	PA-19-130	4R00CA234208-03	4	R00	CA	234208	3		SALVADOR MORALES, CAROLINA	8/16/22	7/31/25	Transition to Independence Study Section (I)[NCI-I]	14371012	9	ENGINEERING (ALL TYPES)	943360412	NTLHJXM55KZ6	943360412	NTLHJXM55KZ6	US	33.423954	-111.940687	488301	ARIZONA STATE U TEMPE CAMPUS		Non-Elite	male	98	TEMPE	AZ	BIOMED ENGR/COL ENGR/ENGR STA	852876011	UNITED STATES	N	8/16/22	7/31/23	398	Non-SBIR/STTR	2022	249000	NCI	165812	coastal
NCI	10453813	##########	PA-19-130	4R00CA245035-02	4	R00	CA	245035	2		KLAUZINSKA, MALGORZATA	##########	##########	ZCA1-RTRB-B(O1)	15606106	7	PHARMACOLOGY	5436803	KG76WYENL5K1	5436803	KG76WYENL5K1	US	42.050479	-87.680046	6144650	NORTHWESTERN U		Elite	male	99	CHICAGO	IL	SCHOOLS OF MEDICINE	606114579	UNITED STATES	N	9/1/21 0:00	##########	398	Non-SBIR/STTR	2021	249000	NCI	164188	coastal
NICHD	8012020	3/15/10 0:00	PA-09-036	4R00HD057233-02	4	R00	HD	57233	2		TAYMANS, SUSAN	3/15/10 0:00	2/28/13 0:00	NSS	8704067	27	NONE	9584210	U2JMKHNS5TG4	9584210	U2JMKHNS5TG4	US	34.134332	-118.12652	1073501	CALIFORNIA INST OF TECHNOLOGY	310	Elite	male	98	PASADENA	CA	SCHOOLS OF ARTS AND SCIENCES	911250001	UNITED STATES	N	3/15/10 0:00	2/28/11 0:00	865	Non-SBIR/STTR	2010	249000	NICHD		#N/A
NEI	8828326	5/1/14 0:00	PA-10-063	4R00EY021624-03	4	R00	EY	21624	3		SHEN, GRACE L	5/1/14 0:00	4/30/17 0:00	NSS	10419657	8	Unavailable	73826000	XQQJEDK7JC21	73826000	XQQJEDK7JC21	US	42.36199	-71.06442	6948301	SCHEPENS EYE RES INST		Elite	male	99	BOSTON	MA	Research Institutes	21142508	UNITED STATES	N	5/1/14 0:00	4/30/15 0:00	867	Non-SBIR/STTR	2014	248949	NEI	150391	#N/A
NINDS	8190422	12/20/10 0:00	PA-10-063	4R00NS064171-03	4	R00	NS	64171	3		OWENS, DAVID F	3/1/09 0:00	12/31/13 0:00	NSS	9354223	9	GENETICS	51113330	FXKMA43NTV21	51113330	FXKMA43NTV21	US	29.70926	-95.400851	481201	BAYLOR COLL OF MED	2647	Non-Elite	male	99	HOUSTON	TX	SCHOOLS OF MEDICINE	770303411	UNITED STATES	N	1/1/11 0:00	12/31/11 0:00	853	Non-SBIR/STTR	2011	247908	NINDS		coastal
NIDA	9284569	8/8/16 0:00	PA-14-042	4R00DA037271-03	4	R00	DA	37271	3		SORENSEN, ROGER	9/1/16 0:00	8/31/19 0:00	NSS	10810587	8	PSYCHOLOGY	193247145	R28EKN92ZTZ9	193247145	R28EKN92ZTZ9	US	42.653979	-84.492032	5245901	MICHIGAN STATE U		Non-Elite	female	98	EAST LANSING	MI	SCHOOLS OF ARTS AND SCIENCES	488242600	UNITED STATES	N	9/1/16 0:00	8/31/17 0:00	279	Non-SBIR/STTR	2016	248637	NIDA	160411	coastal
NIGMS	10661143	8/3/22	PA-19-130	4R00GM135487-03	4	R00	GM	135487	3		GINDHART, JOSEPH G	3/1/20	7/31/25	ZGM1-SRC(99)	15827309	2	OTHER BASIC SCIENCES	42092122	U3NVH931QJJ3	42092122	U3NVH931QJJ3; XRPPWZ3TK937	US	35.784675	-78.677233	578204	NORTH CAROLINA STATE U RALEIGH	1656	Non-Elite	male	99	RALEIGH	NC	EARTH SCIENCES/RESOURCES	276957514	UNITED STATES	N	8/3/22	7/31/23	859	Non-SBIR/STTR	2022	249000	NIGMS	173439	coastal
NIAID	7799555	8/10/09 0:00	PA-09-036	4R00AI072961-02	4	R00	AI	72961	2		HUNTLEY, CLAYTON C	6/15/08 0:00	7/31/11 0:00	NSS	8621582	9	INTERNAL MEDICINE/MEDICINE	800771594	ZUFBNVZ587D4	800771594	ZUFBNVZ587D4	US	29.703025	-95.403303	578417	U OF TEXAS HLTH SCI CTR HOUSTON		Non-Elite	male	99	HOUSTON	TX	SCHOOLS OF MEDICINE	770305400	UNITED STATES	N	8/11/09 0:00	7/31/10 0:00	855	Non-SBIR/STTR	2009	249000	NIAID		#N/A
NIDDK	9487517	1/12/18 0:00	PA-14-042	4R00DK105205-03	4	R00	DK	105205	3		MULLINS, CHRISTOPHER V	1/12/18 0:00	12/31/20 0:00	NSS	10527799	26	MICROBIOLOGY/IMMUN/VIROLOGY	38633251	LMCJKRFW5R81	38633251	LMCJKRFW5R81	US	43.003074	-78.785924	5992614	STATE U OF NEW YORK AT BUFFALO		Non-Elite	female	100	AMHERST	NY	SCHOOLS OF MEDICINE	142282567	UNITED STATES	N	1/12/18 0:00	12/31/18 0:00	847	Non-SBIR/STTR	2018	247681	NIDDK	159560	coastal
NIAAA	10159431	6/8/20 0:00	PA-16-193	4R00AA025998-03	4	R00	AA	25998	3		ZHA, WENXING	6/1/20 0:00	5/31/23 0:00	NSS	12545967	20	PSYCHOLOGY	800189185	U44ZMVYU52U6	800189185	U44ZMVYU52U6	US	29.567119	-98.605723	578416	U OF TEXAS SAN ANTONIO		Non-Elite	male	99	SAN ANTONIO	TX	SCHOOLS OF ARTS AND SCIENCES	782491644	UNITED STATES	N	6/1/20 0:00	5/31/21 0:00	273	Non-SBIR/STTR	2020	249000	NIAAA	166187	coastal
NIMH	10378914	##########	PA-18-398	4R00MH116064-03	4	R00	MH	116064	3		PACHECO, JENNI	9/7/18 0:00	##########	ZMH1-ERB-M(07)	11330995	7	Unavailable	76593722	Z1L9F1MM1RY3	76593722	Z1L9F1MM1RY3	US	42.337481	-71.104964	1504801	BOSTON CHILDRENS HOSP		Elite	female	98	BOSTON	MA	Independent Hospitals	21155724	UNITED STATES	N	9/1/21 0:00	##########	242	Non-SBIR/STTR	2021	249000	NIMH	140679	#N/A
NHLBI	9212396	5/30/16 0:00	PA-14-042	4R00HL122507-03	4	R00	HL	122507	3		OH, YOUNGSUK	11/15/14 0:00	5/31/19 0:00	NSS	9373486	10	NEUROSCIENCES	129348186	TNKGNDAWB445	129348186	TNKGNDAWB445	US	40.264414	-76.674014	1524204	PENNSYLVANIA STATE		Non-Elite	female	98	HERSHEY	PA	SCHOOLS OF MEDICINE	170332360	UNITED STATES	N	6/1/16 0:00	5/31/17 0:00	837	Non-SBIR/STTR	2016	249000	NHLBI	199250	coastal
NINDS	9460679	4/21/17 0:00	PA-14-042	4R00NS093071-03	4	R00	NS	93071	3		BABCOCK, DEBRA J	5/1/17 0:00	4/30/20 0:00	NSS	10702223	13	NEUROSCIENCES	621889815	QHF5ZZ114M72	621889815	QHF5ZZ114M72	US	40.8415	-73.9414	1833205	COLUMBIA U HEALTH SCI		Elite	male	100	NEW YORK	NY	SCHOOLS OF MEDICINE	100323725	UNITED STATES	N	5/1/17 0:00	4/30/18 0:00	853	Non-SBIR/STTR	2017	249000	NINDS	228919	coastal
NIEHS	8573079	3/5/13 0:00	PA-11-197	4R00ES019597-03	4	R00	ES	19597	3		GRAY, KIMBERLY A	3/5/13 0:00	2/29/16 0:00	NSS	9782928	13	PUBLIC HEALTH & PREV MEDICINE	78861598	C8H9CNG1VBD9	78861598	C8H9CNG1VBD9	US	40.790284	-73.946781	3839801	ICAHN SCH OF MED AT MOUNT SINAI		Non-Elite	male	100	NEW YORK	NY	SCHOOLS OF MEDICINE	100296574	UNITED STATES	N	3/5/13 0:00	2/28/14 0:00	113	Non-SBIR/STTR	2013	249000	NIEHS	181346	#N/A
NIA	9989940	8/26/19 0:00	PA-16-193	4R00AG056597-03	4	R00	AG	56597	3		YANG, AUSTIN JYAN-YU	9/1/19 0:00	5/31/22 0:00	NSS	10089868	7	NEUROLOGY	63690705	YND4PLMC9AN7	63690705	YND4PLMC9AN7	US	33.50591	-86.799772	1288803	U OF ALABAMA AT BIRMINGHAM		Non-Elite	male	99	BIRMINGHAM	AL	SCHOOLS OF MEDICINE	352940001	UNITED STATES	N	9/1/19 0:00	5/31/20 0:00	866	Non-SBIR/STTR	2019	249000	NIA	180643	coastal
NICHD	8225667	6/15/11 0:00	PA-06-133	4R00HD055054-04	4	R00	HD	55054	4		ILEKIS, JOHN V	5/1/11 0:00	4/30/14 0:00	NSS	7088771	3	OBSTETRICS & GYNECOLOGY	16060860	YXJGGNC5J269	16060860	YXJGGNC5J269	US	39.026584	-94.636347	1484303	U OF KANSAS MED CTR	2188	Non-Elite	male	98	KANSAS CITY	KS	SCHOOLS OF MEDICINE	661608500	UNITED STATES	N	5/1/11 0:00	4/30/12 0:00	865	Non-SBIR/STTR	2011	249000	NICHD		#N/A
NIBIB	9349872	9/19/16 0:00	PA-11-197	4R00EB016971-03	4	R00	EB	16971	3		KROSNICK, STEVEN	9/19/16 0:00	7/31/19 0:00	NSS	11339153	5	ENGINEERING (ALL TYPES)	97394084	EMW9FC8J3HN4	97394084	EMW9FC8J3HN4	US	33.781897	-84.404009	676603	GEORGIA INST OF TECHNOLOGY		Non-Elite	male	99	ATLANTA	GA	BIOMED ENGR/COL ENGR/ENGR STA	303320415	UNITED STATES	N	9/19/16 0:00	7/31/17 0:00	286	Non-SBIR/STTR	2016	248007	NIBIB	171036	coastal
NCI	9148273	9/26/15 0:00	PA-11-197	4R00CA187664-03	4	R00	CA	187664	3		KONDAPAKA, SUDHIR B	8/1/15 0:00	8/31/18 0:00	NSS	12001657	3	BIOLOGY	42250712	GM1XX56LEP58	42250712	GM1XX56LEP58	US	39.953462	-75.193983	6463801	U OF PENNSYLVANIA		Elite	male	98	PHILADELPHIA	PA	SCHOOLS OF MEDICINE	191046205	UNITED STATES	N	9/25/15 0:00	8/31/16 0:00	398	Non-SBIR/STTR	2015	249000	NCI	164569	#N/A
NHGRI	10455118	8/6/21 0:00	PA-19-130	4R00HG011367-02	4	R00	HG	11367	2		PILLAI, AJAY	8/6/21 0:00	##########	NSS	15679360	5	Unavailable	79917897	GYLUH9UXHDX5	79917897	GYLUH9UXHDX5	US	36.143784	-86.800995	10040927	VANDERBILT U MED CTR	1038	Non-Elite	male	98	NASHVILLE	TN	Independent Hospitals	372320011	UNITED STATES	N	8/6/21 0:00	##########	172	Non-SBIR/STTR	2021	249000	NHGRI	146209	#N/A
NEI	10529847	1/31/22	PA-19-130	4R00EY031782-03	4	R00	EY	31782	3		GREENWELL, THOMAS	9/30/20	11/30/24	NSS	16164176	33	BIOCHEMISTRY	92530369	RN64EPNH8JC6	92530369	RN64EPNH8JC6	US	34.070199	-118.45102	577505	U OF CALIFORNIA LOS ANGELES		Elite	male	97	LOS ANGELES	CA	SCHOOLS OF ARTS AND SCIENCES	900952000	UNITED STATES	N	12/1/21	11/30/22	867	Non-SBIR/STTR	2022	249001	NEI	226744	coastal
NEI	8513442	8/6/12 0:00	PA-11-197	4R00EY021503-02	4	R00	EY	21503	2		STEINMETZ, MICHAEL A	9/1/11 0:00	7/31/15 0:00	NSS	7983374	12	BIOCHEMISTRY	73133571	GNJ7BBP73WE9	73133571	GNJ7BBP73WE9	US	42.275494	-83.743038	1506502	U OF MICHIGAN AT ANN ARBOR		Elite	female	98	ANN ARBOR	MI	SCHOOLS OF ARTS AND SCIENCES	481091276	UNITED STATES	N	9/1/12 0:00	7/31/13 0:00	867	Non-SBIR/STTR	2012	248898	NEI	191979	#N/A
NIAAA	9222263	4/12/16 0:00	PA-14-042	4R00AA023507-02	4	R00	AA	23507	2		CUI, CHANGHAI	4/15/15 0:00	3/31/19 0:00	NSS	11973489	7	PSYCHIATRY	603007902	SHHBRBAPSM35	603007902; 625168166	DKNHLK3NBPH7; DL9MTNNKWYR9; GY8GKRUWM7D5; HA48EWMJFV47; HCNBFNDANNV5; HCRDU7BNPZ13; HCWTYJ7KQ4U6; HEBLAL94JHP7; NKCRSKVJBXE3; SHHBRBAPSM35; TA1NYNZ27LQ7; WJJRCLJ936C8; X51WYC1QEPD7; XNBJV454V2W1; YCJNP5NJYCY1; YW8WNKKANDR9	US	39.779213	-86.175288	577806	INDIANA U PURDUE U AT INDIANAPOLIS	2310	Non-Elite	male	96	INDIANAPOLIS	IN	SCHOOLS OF MEDICINE	462022915	UNITED STATES	N	4/15/16 0:00	3/31/17 0:00	273	Non-SBIR/STTR	2016	248933	NIAAA	174292	#N/A
NCI	9034140	4/17/15 0:00	PA-11-197	4R00CA176847-03	4	R00	CA	176847	3		YASSIN, RIHAB R	2/11/14 0:00	4/30/18 0:00	NSS	9714711	45	ANATOMY/CELL BIOLOGY	46705849	MJC5FCYQTPE6	46705849	MJC5FCYQTPE6	US	33.64852	-117.82136	577504	U OF CALIFORNIA IRVINE	1814	Non-Elite	male	100	IRVINE	CA	SCHOOLS OF ARTS AND SCIENCES	926970001	UNITED STATES	N	5/1/15 0:00	4/30/16 0:00	396	Non-SBIR/STTR	2015	235402	NCI	164130	coastal
NIAAA	10546580	2/25/22	PAR-18-814	4R00AA027740-02	4	R00	AA	27740	2		CUI, CHANGHAI	3/1/22	2/28/25	NSS	12566474	7	PHARMACOLOGY	5436803	KG76WYENL5K1	5436803	KG76WYENL5K1	US	42.050479	-87.680046	6144650	NORTHWESTERN U		Elite	female	96	CHICAGO	IL	SCHOOLS OF MEDICINE	606114579	UNITED STATES	N	3/1/22	2/28/23	273	Non-SBIR/STTR	2022	249000	NIAAA	199977	#N/A
NIGMS	9815646	12/10/18 0:00	PA-15-083	4R00GM115766-02	4	R00	GM	115766	2		SOMERS, SCOTT D	9/15/16 0:00	11/30/21 0:00	NSS	12437745	4	GENETICS	5309844	DQDBM7FGJPC5	5309844	DQDBM7FGJPC5	US	42.022225	-93.639475	3974801	IOWA STATE U	1506	Non-Elite	male	96	AMES	IA	SCHOOLS OF ARTS AND SCIENCES	500112025	UNITED STATES	N	12/10/18 0:00	11/30/19 0:00	859	Non-SBIR/STTR	2019	249000	NIGMS	166982	#N/A
NCI	10442077	##########	PA-19-130	4R00CA252025-02	4	R00	CA	252025	2		MILLER, DAVID J	8/1/20 0:00	##########	Transition to Independence Study Section (I)[NCI-I]	12453732	3	Unavailable	75524595	DW1XZMGNFBL4	75524595	DW1XZMGNFBL4	US	39.951288	-75.195771	9340401	WISTAR INST		Non-Elite	male	70	PHILADELPHIA	PA	Research Institutes	191044265	UNITED STATES	N	8/1/21 0:00	##########	398	Non-SBIR/STTR	2021	249000	NCI	175004	#N/A
NICHD	9749323	8/22/18 0:00	PA-16-077	4R00HD087523-03	4	R00	HD	87523	3		RAITEN, DANIEL J	8/22/18 0:00	7/30/21 0:00	NSS	12387223	13	PUBLIC HEALTH & PREV MEDICINE	78861598	C8H9CNG1VBD9	78861598	C8H9CNG1VBD9	US	40.790284	-73.946781	3839801	ICAHN SCH OF MED AT MOUNT SINAI		Non-Elite	female	98	NEW YORK	NY	SCHOOLS OF MEDICINE	100296574	UNITED STATES	N	8/22/18 0:00	7/31/19 0:00	865	Non-SBIR/STTR	2018	249000	NICHD	146913	coastal
NICHD	9858618	2/8/19 0:00	PA-15-083	6R00HD085188-03	6	R00	HD	85188	3		HENKEN, DEBORAH B	6/18/18 0:00	5/31/21 0:00	NSS	11089517	14	Unavailable	81266487	H6N1ZF5HJ2G3	81266487	H6N1ZF5HJ2G3	US	40.85103	-73.844379	10053556	ALBERT EINSTEIN COLL OF MED		Non-Elite	female	98	BRONX	NY	Domestic Higher Education	104611900	UNITED STATES	N	1/1/19 0:00	5/31/19 0:00	865	Non-SBIR/STTR	2018	96417	NICHD	67760	#N/A
NHLBI	10091577	4/10/20 0:00	PA-16-193	4R00HL138288-03	4	R00	HL	138288	3		WANG, WAYNE C	4/15/20 0:00	3/31/23 0:00	NSS	14131647	17	ENGINEERING (ALL TYPES)	847205572	QD1MX6N5YTN4	847205572	QD1MX6N5YTN4	US	30.561542	-96.253207	8266919	TEXAS ENGINEERING EXPERIMENT STATION		Non-Elite	male	97	COLLEGE STATION	TX	BIOMED ENGR/COL ENGR/ENGR STA	778433577	UNITED STATES	N	4/15/20 0:00	3/31/21 0:00	837	Non-SBIR/STTR	2020	249000	NHLBI	184814	#N/A
NHLBI	8289712	8/12/11 0:00		4R00HL098458-03	4	R00	HL	98458	3		COOPER, LAWTON S	8/15/11 0:00	5/31/14 0:00	NSS	9155014	4	PUBLIC HEALTH & PREV MEDICINE	608195277	D3LHU66KBLD5	608195277	D3LHU66KBLD5	US	35.9316	-79.057377	578206	U OF NORTH CAROLINA CHAPEL HILL		Elite	female	93	CHAPEL HILL	NC	SCHOOLS OF PUBLIC HEALTH	275995023	UNITED STATES	N	8/15/11 0:00	5/31/12 0:00	837	Non-SBIR/STTR	2011	249000	NHLBI		#N/A
NHGRI	8788303	1/15/14 0:00	PA-11-197	4R00HG006860-02	4	R00	HG	6860	2		PAZIN, MICHAEL J	7/23/12 0:00	12/31/16 0:00	NSS	9886760	3	BIOMEDICAL ENGINEERING	47120084	TX2DAGQPENZ5	47120084	TX2DAGQPENZ5	US	38.543366	-121.72946	577503	U OF CALIFORNIA AT DAVIS		Non-Elite	female	96	DAVIS	CA	BIOMED ENGR/COL ENGR/ENGR STA	956186153	UNITED STATES	N	1/21/14 0:00	12/31/14 0:00	172	Non-SBIR/STTR	2014	249000	NHGRI	180161	coastal
NIDDK	7906394	9/7/09 0:00	PA-06-133	4R00DK077444-03	4	R00	DK	77444	3		RYS-SIKORA, KRYSTYNA E	9/10/07 0:00	8/31/12 0:00	NSS	8639577	10	INTERNAL MEDICINE/MEDICINE	129348186	TNKGNDAWB445	129348186	TNKGNDAWB445	US	40.264414	-76.674014	1524204	PENNSYLVANIA STATE		Non-Elite	male	85	HERSHEY	PA	SCHOOLS OF MEDICINE	170332360	UNITED STATES	N	9/10/09 0:00	8/31/10 0:00	847	Non-SBIR/STTR	2009	249000	NIDDK		coastal
NINDS	8726564	9/14/13 0:00	PA-10-063	4R00NS075099-03	4	R00	NS	75099	3		UTZ, URSULA	9/15/13 0:00	8/31/16 0:00	NSS	10297590	5	Unavailable	77333797	NGCNCJ1X6XA4	77333797	NGCNCJ1X6XA4	US	35.482988	-97.49781	6239601	OKLAHOMA MED RES FOUNDATION		Non-Elite	male	99	OKLAHOMA CITY	OK	Research Institutes	731045005	UNITED STATES	N	9/15/13 0:00	8/31/14 0:00	853	Non-SBIR/STTR	2013	249000	NINDS	146471	#N/A
NIEHS	8831815	6/17/14 0:00	PA-11-197	4R00ES021535-03	4	R00	ES	21535	3		MCALLISTER, KIMBERLY A	6/17/14 0:00	5/31/17 0:00	NSS	9840740	2	BIOLOGY	42092122	U3NVH931QJJ3	42092122	U3NVH931QJJ3; XRPPWZ3TK937	US	35.784675	-78.677233	578204	NORTH CAROLINA STATE U RALEIGH		Non-Elite	male	99	RALEIGH	NC	SCHOOLS OF ARTS AND SCIENCES	276957514	UNITED STATES	N	6/17/14 0:00	5/31/15 0:00	113	Non-SBIR/STTR	2014	249000	NIEHS	171667	coastal
NINDS	9332667	9/13/16 0:00	PA-11-197	4R00NS088193-03	4	R00	NS	88193	3		CHEN, DAOFEN	8/1/16 0:00	7/31/19 0:00	NSS	8229649	49	Unavailable	78731668	NNJ6BMBTFGN5	78731668	NNJ6BMBTFGN5	US	32.8863	-117.243929	7210001	SALK INST FOR BIOLOGICAL STUDIES		Non-Elite	female	59	La Jolla	CA	Research Institutes	920371002	UNITED STATES	N	8/1/16 0:00	7/31/17 0:00	853	Non-SBIR/STTR	2016	249000	NINDS	200331	#N/A
NCI	10102369	5/6/20 0:00	PA-16-193	4R00CA230195-03	4	R00	CA	230195	3		GRIL, BRUNILDE M	5/1/20 0:00	4/30/23 0:00	NSS	14079667	10	BIOMEDICAL ENGINEERING	49179401	F4N1QNPB95M4	49179401	F4N1QNPB95M4	US	40.81207	-73.954377	1833202	COLUMBIA U NEW YORK MORNINGSIDE		Elite	female	92	NEW YORK	NY	BIOMED ENGR/COL ENGR/ENGR STA	100276900	UNITED STATES	N	5/1/20 0:00	4/30/21 0:00	396	Non-SBIR/STTR	2020	249000	NCI	157144	#N/A
NIA	9231040	4/28/16 0:00	PA-11-197	4R00AG044445-03	4	R00	AG	44445	3		OPANASHUK, LISA A	5/1/16 0:00	4/30/19 0:00	NSS	10095513	6	OTHER HEALTH PROFESSIONS	939017877	H1HYA8Z1NTM5	939017877	H1HYA8Z1NTM5	US	38.040959	-84.505885	2793601	U OF KENTUCKY	1533	Non-Elite	male	99	LEXINGTON	KY	SCHOOLS OF MEDICINE	405260001	UNITED STATES	N	5/1/16 0:00	4/30/17 0:00	866	Non-SBIR/STTR	2016	249000	NIA	185246	coastal
NCI	10672517	8/26/22	PA-20-188	4R00CA263033-02	4	R00	CA	263033	2		SNYDERWINE, ELIZABETH G	9/1/22	8/31/25	Transition to Independence Study Section (I)[NCI-I]	15047221	13	INTERNAL MEDICINE/MEDICINE	78861598	C8H9CNG1VBD9	78861598	C8H9CNG1VBD9	US	40.790284	-73.946781	3839801	ICAHN SCH OF MED AT MOUNT SINAI		Non-Elite	male	99	NEW YORK	NY	SCHOOLS OF MEDICINE	100296574	UNITED STATES	N	9/1/22	8/31/23	398	Non-SBIR/STTR	2022	249000	NCI	147337	#N/A
NICHD	10641314	8/1/22	PA-19-130	4R00HD100585-03	4	R00	HD	100585	3		LONGO, MONICA	8/1/22	7/31/25	ZHD1-SRC(99)	11982269	13	Unavailable	150829349	P1RTMASB37B5	150829349	P1RTMASB37B5	US	37.805769	-122.265214	3497005	KAISER FOUNDATION RES INST		Non-Elite	female	98	OAKLAND	CA	Research Institutes	946123466	UNITED STATES	N	8/1/22	7/31/23	865	Non-SBIR/STTR	2022	248947	NICHD	161697	coastal
NHLBI	10362776	##########	PA-18-398	4R00HL145004-03	4	R00	HL	145004	3		LAPOSKY, AARON D	5/1/21 0:00	##########	NSS	12470472	7	Unavailable	48682157	SZ32VTCXM799	48682157	SZ32VTCXM799	US	47.66243	-122.28229	1531401	SEATTLE CHILDRENS HOSP		Non-Elite	male	99	SEATTLE	WA	Independent Hospitals	981053901	UNITED STATES	N	5/1/21 0:00	##########	838	Non-SBIR/STTR	2021	248999	NHLBI	132095	coastal
NIDCD	8959353	12/22/14 0:00	PA-11-197	4R00DC012536-03	4	R00	DC	12536	3		RIVERA-RENTAS, ALBERTO L	8/8/12 0:00	12/31/17 0:00	NSS	9586291	1	NEUROSCIENCES	68552207	L6NFUM28LQM5	68552207	L6NFUM28LQM5	US	38.664368	-90.323797	9083901	WASHINGTON U	1373	Non-Elite	female	97	SAINT LOUIS	MO	SCHOOLS OF MEDICINE	631304862	UNITED STATES	N	1/1/15 0:00	12/31/15 0:00	173	Non-SBIR/STTR	2015	248999	NIDCD	163278	coastal
NIA	9193129	2/12/16 0:00	PA-11-197	4R00AG048016-03	4	R00	AG	48016	3		KOHANSKI, RONALD A	2/15/16 0:00	1/31/19 0:00	NSS	10981442	4	GENETICS	5309844	DQDBM7FGJPC5	5309844	DQDBM7FGJPC5	US	42.022225	-93.639475	3974801	IOWA STATE U		Non-Elite	male	52	AMES	IA	SCHOOLS OF ARTS AND SCIENCES	500112025	UNITED STATES	N	2/15/16 0:00	1/31/17 0:00	866	Non-SBIR/STTR	2016	249000	NIA	191537	coastal
NIMH	8309585	8/22/11 0:00	PA-11-197	4R00MH085039-03	4	R00	MH	85039	3		ASANUMA, CHIIKO	8/22/11 0:00	6/30/14 0:00	NSS	9346167	7	Unavailable	78200995	HMSNCM57QNR5	78200995	HMSNCM57QNR5	US	47.627342	-122.331593	861001	FRED HUTCHINSON CANCER RES CTR		Elite	male	78	SEATTLE	WA	Research Institutes	981094433	UNITED STATES	N	8/22/11 0:00	6/30/12 0:00	242	Non-SBIR/STTR	2011	248999	NIMH		coastal
NINR	10241684	9/3/20 0:00	PA-16-193	4R00NR017897-03	4	R00	NR	17897	3		BANKS, DAVID	8/29/18 0:00	7/31/23 0:00	Nursing Science Review Committee[NRRC(71)]	12672129	5	NONE	66469933	S352L5PJLMP8	66469933	S352L5PJLMP8	US	33.791247	-84.3249	2384501	EMORY U	1818	Non-Elite	male	100	ATLANTA	GA	SCHOOLS OF NURSING	303221007	UNITED STATES	N	9/3/20 0:00	7/31/21 0:00	361	Other Research-Related	2020	248999	NINR	159615	#N/A
NIDDK	8511019	8/16/12 0:00	PA-11-197	4R00DK088963-03	4	R00	DK	88963	3		WRIGHT, DANIEL G	8/16/12 0:00	6/30/15 0:00	NSS	10180684	30	BIOLOGY	800771545	YZJ6DKPM4W63	800771545	YZJ6DKPM4W63	US	32.811963	-96.837534	578404	UT SOUTHWESTERN MED CTR	1862	Non-Elite	female	90	DALLAS	TX	SCHOOLS OF MEDICINE	753909105	UNITED STATES	N	8/16/12 0:00	6/30/13 0:00	847	Non-SBIR/STTR	2012	249000	NIDDK	178899	#N/A
AHRQ	8851060	6/6/14 0:00	RFA-HS-12-007	4R00HS022192-02	4	R00	HS	22192	2		WILLIS, TAMARA	3/1/13 0:00	2/28/17 0:00	NSS	11481033	18	Unavailable	9214214	HJD6G4D6TJY5	9214214	HJD6G4D6TJY5	US	37.426852	-122.17047	8046501	STANFORD U	2106	Elite	male	99	STANFORD	CA	Domestic Higher Education	943052004	UNITED STATES	N	3/1/14 0:00	2/28/15 0:00	226	Non-SBIR/STTR	2014	248999	AHRQ	157271	coastal
NHLBI	9376985	12/23/16 0:00	PA-14-042	4R00HL124322-03	4	R00	HL	124322	3		LUNDBERG, MARTHA	1/1/17 0:00	12/31/19 0:00	NSS	10840913	12	BIOMEDICAL ENGINEERING	73133571	GNJ7BBP73WE9	73133571	GNJ7BBP73WE9	US	42.275494	-83.743038	1506502	U OF MICHIGAN AT ANN ARBOR		Elite	male	100	ANN ARBOR	MI	SCHOOLS OF MEDICINE	481091276	UNITED STATES	N	1/1/17 0:00	12/31/17 0:00	837	Non-SBIR/STTR	2017	249000	NHLBI	213871	#N/A
NIGMS	8895468	8/26/14 0:00	PA-11-197	4R00GM098328-03	4	R00	GM	98328	3		WILLIS, KRISTINE AMALEE	4/6/12 0:00	7/31/17 0:00	NSS	10203159	7	BIOLOGY	603007902	SHHBRBAPSM35	603007902; 625168166	DKNHLK3NBPH7; DL9MTNNKWYR9; GY8GKRUWM7D5; HA48EWMJFV47; HCNBFNDANNV5; HCRDU7BNPZ13; HCWTYJ7KQ4U6; HEBLAL94JHP7; NKCRSKVJBXE3; SHHBRBAPSM35; TA1NYNZ27LQ7; WJJRCLJ936C8; X51WYC1QEPD7; XNBJV454V2W1; YCJNP5NJYCY1; YW8WNKKANDR9	US	39.779213	-86.175288	577806	INDIANA U PURDUE U AT INDIANAPOLIS		Non-Elite	female	89	INDIANAPOLIS	IN	SCHOOLS OF ARTS AND SCIENCES	462022915	UNITED STATES	N	9/1/14 0:00	7/31/15 0:00	859	Non-SBIR/STTR	2014	248817	NIGMS	159498	coastal
NEI	8786916	2/4/14 0:00	PA-09-036	4R00EY020518-03	4	R00	EY	20518	3		CHIN, HEMIN R	1/1/14 0:00	12/31/16 0:00	NSS	9860691	9	ENGINEERING (ALL TYPES)	55688857	F2VSMAKDH8Z7	55688857	F2VSMAKDH8Z7	US	35.120123	-89.939705	1274604	U OF MEMPHIS	695	Non-Elite	male	100	MEMPHIS	TN	BIOMED ENGR/COL ENGR/ENGR STA	381520001	UNITED STATES	N	1/1/14 0:00	12/31/14 0:00	867	Non-SBIR/STTR	2014	248999	NEI	201028	coastal
NINDS	8598319	4/9/13 0:00	PA-10-063	4R00NS070821-03	4	R00	NS	70821	3		FUREMAN, BRANDY E	5/1/11 0:00	3/31/16 0:00	NSS	8855758	13	RADIATION-DIAGNOSTIC/ONCOLOGY	78861598	C8H9CNG1VBD9	78861598	C8H9CNG1VBD9	US	40.790284	-73.946781	3839801	ICAHN SCH OF MED AT MOUNT SINAI		Non-Elite	female	98	NEW YORK	NY	SCHOOLS OF MEDICINE	100296574	UNITED STATES	N	4/15/13 0:00	3/31/14 0:00	853	Non-SBIR/STTR	2013	240061	NINDS	151521	coastal
NINDS	7934978	9/25/09 0:00	PA-07-297	4R00NS061763-03	4	R00	NS	61763	3		JETT, DAVID ALAN	7/1/08 0:00	6/30/12 0:00	NSS	8631884	4	MICROBIOLOGY/IMMUN/VIROLOGY	153890272	SZPJL5ZRCLF4	153890272	SZPJL5ZRCLF4	US	38.948231	-92.327335	578002	U OF MISSOURI COLUMBIA	1739	Non-Elite	male	99	COLUMBIA	MO	SCHOOLS OF MEDICINE	652110001	UNITED STATES	N	9/28/09 0:00	6/30/10 0:00	853	Non-SBIR/STTR	2009	248999	NINDS		coastal
NCI	9044055	4/30/15 0:00	PA-11-197	4R00CA181491-02	4	R00	CA	181491	2		ARYA, SURESH	7/1/14 0:00	4/29/16 0:00	NSS	10166490	5	INTERNAL MEDICINE/MEDICINE	965717143	GTNBNWXJ12D5	965717143	DWH7MSXKA2A8; GTNBNWXJ12D5	US	36.143381	-86.803365	8721001	VANDERBILT U	1038	Non-Elite	male	98	Nashville	TN	SCHOOLS OF MEDICINE	372032408	UNITED STATES	N	5/1/15 0:00	4/29/16 0:00	395	Non-SBIR/STTR	2015	249000	NCI	158599	#N/A
NIDCD	10306965	##########	PA-18-398	4R00DC016905-03	4	R00	DC	16905	3		RIVERA-RENTAS, ALBERTO L	##########	##########	Communication Disorders Review Committee[CDRC]	11398275	9	OTHER BASIC SCIENCES	943360412	NTLHJXM55KZ6	943360412	NTLHJXM55KZ6	US	33.423954	-111.94069	488301	ARIZONA STATE U TEMPE CAMPUS		Non-Elite	male	99	TEMPE	AZ	SCHOOLS OF ARTS AND SCIENCES	852876011	UNITED STATES	N	1/1/21 0:00	##########	173	Non-SBIR/STTR	2021	249000	NIDCD	179293	#N/A
NIMH	9107536	8/20/15 0:00	PA-11-197	4R00MH099252-03	4	R00	MH	99252	3		CHAVEZ, MARK	8/1/15 0:00	4/30/18 0:00	NSS	10125809	5	Unavailable	46514535	MCKWJYCWNVN3	46514535	MCKWJYCWNVN3	US	42.393619	-71.191142	1876801	MCLEAN HOSP		Elite	male	100	BELMONT	MA	Independent Hospitals	24781064	UNITED STATES	N	8/1/15 0:00	4/30/16 0:00	242	Non-SBIR/STTR	2015	248322	NIMH	157166	#N/A
NICHD	10542985	2/10/22	PA-16-193	4R00HD092542-03	4	R00	HD	92542	3		BUHRING, BETTINA D	2/10/22	1/31/25	NSS	12470161	52	PSYCHOLOGY	804355790	UYTTZT6G9DT1	804355790	UYTTZT6G9DT1	US	32.876991	-117.24087	577507	U OF CALIFORNIA SAN DIEGO		Elite	male	100	LA JOLLA	CA	SCHOOLS OF ARTS AND SCIENCES	920930621	UNITED STATES	N	2/10/22	1/31/23	865	Non-SBIR/STTR	2022	248999	NICHD	218394	coastal
NIDDK	10402497	##########	PA-18-398	4R00DK118110-03	4	R00	DK	118110	3		PERRIN, PETER J	9/1/21 0:00	##########	NSS	12544334	18	MICROBIOLOGY/IMMUN/VIROLOGY	9214214	HJD6G4D6TJY5	9214214	HJD6G4D6TJY5	US	37.426852	-122.17047	8046501	STANFORD U		Elite	female	98	STANFORD	CA	SCHOOLS OF MEDICINE	943052004	UNITED STATES	N	9/1/21 0:00	##########	847	Non-SBIR/STTR	2021	248912	NIDDK	173872	coastal
NCI	9658641	5/3/18 0:00	PA-15-083	4R00CA201592-03	4	R00	CA	201592	3		FINGERMAN, IAN M	5/3/18 0:00	4/30/21 0:00	NSS	12519318	7	Unavailable	76580745	DPMGH9MG1X67	76580745	DPMGH9MG1X67	US	42.337593	-71.108279	1464901	DANA FARBER CANCER INST		Elite	female	100	BOSTON	MA	Independent Hospitals	22155450	UNITED STATES	N	5/3/18 0:00	4/30/19 0:00	393	Non-SBIR/STTR	2018	249000	NCI	147775	#N/A
NHLBI	9966325	8/7/19 0:00	PA-16-193	4R00HL141650-03	4	R00	HL	141650	3		GALIS, ZORINA S	4/6/18 0:00	8/31/22 0:00	NSS	11215687	3	PHYSIOLOGY	806345617	ED44Y3W6P7B9	806345617	ED44Y3W6P7B9	US	32.232844	-110.959467	490201	U OF ARIZONA	1805	Non-Elite	male	99	TUCSON	AZ	SCHOOLS OF MEDICINE	857210158	UNITED STATES	N	9/1/19 0:00	8/31/20 0:00	837	Non-SBIR/STTR	2019	249000	NHLBI	162215	#N/A
NHLBI	7862648	9/8/09 0:00	PA-06-133	4R00HL091177-02	4	R00	HL	91177	2		THRASHER, TERRY N	9/10/09 0:00	7/31/12 0:00	NSS	8908616	8	BIOLOGY	41808262	HJTLACN81NK1	41808262	HJTLACN81NK1	US	42.65796	-83.18652	746601	OAKLAND U	572	Non-Elite	female	98	ROCHESTER	MI	SCHOOLS OF ARTS AND SCIENCES	483094422	UNITED STATES	N	9/10/09 0:00	7/31/10 0:00	837	Non-SBIR/STTR	2009	242943	NHLBI		#N/A
NIMH	8469985	8/14/12 0:00	PA-10-063	4R00MH092438-03	4	R00	MH	92438	3		DESMOND, NANCY L	8/27/12 0:00	7/31/15 0:00	NSS	9299542	2	PSYCHOLOGY	57123192	QD4MGHFDJKU1	57123192	QD4MGHFDJKU1	US	39.980272	-75.157051	8240301	TEMPLE U OF THE COMMONWEALTH		Non-Elite	female	99	PHILADELPHIA	PA	SCHOOLS OF ARTS AND SCIENCES	191226003	UNITED STATES	N	8/27/12 0:00	7/31/13 0:00	242	Non-SBIR/STTR	2012	249000	NIMH	210286	coastal
NIDA	9378801	3/14/17 0:00	PA-11-197	4R00DA034648-03	4	R00	DA	34648	3		SORENSEN, ROGER	3/1/17 0:00	2/29/20 0:00	NSS	9176382	52	BIOLOGY	804355790	UYTTZT6G9DT1	804355790	UYTTZT6G9DT1	US	32.876991	-117.24087	577507	U OF CALIFORNIA SAN DIEGO		Elite	male	100	LA JOLLA	CA	SCHOOLS OF ARTS AND SCIENCES	920930621	UNITED STATES	N	3/1/17 0:00	2/28/18 0:00	279	Non-SBIR/STTR	2017	249000	NIDA	230825	coastal
NEI	9395287	1/11/17 0:00	PA-11-197	4R00EY024267-03	4	R00	EY	24267	3		MCKIE, GEORGE ANN	2/1/17 0:00	1/31/20 0:00	NSS	10441849	6	PHYSIOLOGY	41096314	MW8JHK6ZYEX8	41096314	MW8JHK6ZYEX8	US	39.745098	-104.837605	1199905	U OF COLORADO DENVER		Non-Elite	male	99	Aurora	CO	SCHOOLS OF MEDICINE	800452570	UNITED STATES	N	2/1/17 0:00	1/31/18 0:00	867	Non-SBIR/STTR	2017	249000	NEI	218530	coastal
NHLBI	9733487	8/22/18 0:00	PA-15-083	4R00HL132123-03	4	R00	HL	132123	3		TJURMINA, OLGA A	9/1/18 0:00	8/31/21 0:00	NSS	14100725	3	PHYSIOLOGY	832127323	DLWBSLWAJWR1	832127323	DLWBSLWAJWR1	US	39.999598	-83.033131	6218701	OHIO STATE U		Non-Elite	male	99	COLUMBUS	OH	SCHOOLS OF MEDICINE	432101016	UNITED STATES	N	9/1/18 0:00	8/31/19 0:00	837	Non-SBIR/STTR	2018	248998	NHLBI	164640	#N/A
NIAMS	9269367	6/23/16 0:00	PA-11-197	4R00AR065480-03	4	R00	AR	65480	3		BAKER, CARL	7/1/16 0:00	6/30/19 0:00	NSS	10414777	7	BIOCHEMISTRY	160079455	EXZVPWZBLUE8	160079455	EXZVPWZBLUE8	US	42.050479	-87.680046	6144601	NORTHWESTERN U	2145	Elite	female	74	Chicago	IL	SCHOOLS OF ARTS AND SCIENCES	606114579	UNITED STATES	N	7/1/16 0:00	6/30/17 0:00	846	Non-SBIR/STTR	2016	249000	NIAMS	189097	coastal
NHGRI	7627891	9/19/08 0:00	PA-07-297	4R00HG004643-02	4	R00	HG	4643	2		FELSENFELD, ADAM	9/20/08 0:00	5/31/11 0:00	NSS	8692514	12	Unavailable	64931884	KUKXRCZ6NZC2	64931884	KUKXRCZ6NZC2	US	40.764045	-73.956024	5079202	SLOAN KETTERING INST CAN RES		Non-Elite	male	82	NEW YORK	NY	Research Institutes	100656007	UNITED STATES	N	9/20/08 0:00	5/31/09 0:00	172	Non-SBIR/STTR	2008	248739	NHGRI		coastal
NCI	9870166	3/12/19 0:00	PA-16-193	4R00CA215249-03	4	R00	CA	215249	3		ESPEY, MICHAEL G	4/1/17 0:00	2/28/22 0:00	NSS	14469963	8	Unavailable	73130411	FLJ7DQKLL226	73130411	FLJ7DQKLL226	US	42.363198	-71.068772	4907701	MASSACHUSETTS GENERAL HOSP		Elite	male	55	BOSTON	MA	Independent Hospitals	21142621	UNITED STATES	N	3/1/19 0:00	2/29/20 0:00	396	Non-SBIR/STTR	2019	249000	NCI	160358	coastal
NINDS	10126077	6/23/20 0:00	PA-16-193	4R00NS105942-03	4	R00	NS	105942	3		HE, JANET	7/1/20 0:00	6/30/23 0:00	NSS	10430391	6	NONE	1912864	M1LVPE5GLSD9	1912864	M1LVPE5GLSD9	US	40.481906	-74.457066	1196203	RUTGERS THE STATE U OF NJ		Non-Elite	female	99	PISCATAWAY	NJ	ORGANIZED RESEARCH UNITS	88543925	UNITED STATES	N	7/1/20 0:00	6/30/21 0:00	853	Non-SBIR/STTR	2020	243959	NINDS	159615	coastal
NIGMS	9321644	9/7/16 0:00	PA-14-042	4R00GM115822-03	4	R00	GM	115822	3		JANES, DANIEL E	8/1/15 0:00	8/31/19 0:00	NSS	11647337	4	BIOLOGY	79289626	Z3FGN9MF92U2	079289626; 948117312	J2KGU972RXG3; Z3FGN9MF92U2	US	44.045509	-123.069741	6297005	U OF OREGON	769	Non-Elite	male	100	EUGENE	OR	ORGANIZED RESEARCH UNITS	974035219	UNITED STATES	N	9/16/16 0:00	8/31/17 0:00	859	Non-SBIR/STTR	2016	248037	NIGMS	190434	#N/A
NIGMS	7893976	8/31/09 0:00	PA-09-036	4R00GM083147-03	4	R00	GM	83147	3		DEATHERAGE, JAMES F	12/1/07 0:00	8/31/12 0:00	NSS	8897254	4	BIOLOGY	627906399	JBQ9M3PLFDP5	627906399	JBQ9M3PLFDP5	US	43.075704	-87.877999	578504	U OF WISCONSIN MILWAUKEE	777	Non-Elite	female	98	MILWAUKEE	WI	SCHOOLS OF ARTS AND SCIENCES	532010340	UNITED STATES	N	9/1/09 0:00	8/31/10 0:00	859	Non-SBIR/STTR	2009	248535	NIGMS		coastal
NHLBI	10199221	8/7/20 0:00	PA-18-398	4R00HL141698-03	4	R00	HL	141698	3		HUANG, LI-SHIN	8/7/20 0:00	6/30/23 0:00	NSS	10797893	7	PHYSIOLOGY	791277940	RFRPFMNR8LA5	791277940	RFRPFMNR8LA5	US	41.865155	-87.833381	4689203	LOYOLA U CHICAGO	535	Non-Elite	male	99	MAYWOOD	IL	SCHOOLS OF MEDICINE	601533328	UNITED STATES	N	8/7/20 0:00	6/30/21 0:00	837	Non-SBIR/STTR	2020	249000	NHLBI	226364	#N/A
NIDA	9926602	9/4/19 0:00	PA-16-193	4R00DA043572-02	4	R00	DA	43572	2		SORENSEN, ROGER	9/15/19 0:00	8/31/22 0:00	ZDA1-SXM-M(03)S	10648907	6	Unavailable	1912864	M1LVPE5GLSD9	1912864	M1LVPE5GLSD9	US	40.481906	-74.457066	1196203	RUTGERS THE STATE U OF NJ		Non-Elite	male	99	PISCATAWAY	NJ	Domestic Higher Education	88543925	UNITED STATES	N	9/15/19 0:00	8/31/20 0:00	279	Non-SBIR/STTR	2019	249000	NIDA	216625	coastal
NIAAA	9588372	12/29/17 0:00	PA-15-083	4R00AA024499-03	4	R00	AA	24499	3		CUI, CHANGHAI	8/1/16 0:00	11/30/20 0:00	NSS	10436551	3	PHARMACOLOGY	2604817	XF3XM9642N96	2604817	XF3XM9642N96	US	39.954073	-75.186541	2205901	DREXEL U		Non-Elite	female	98	PHILADELPHIA	PA	SCHOOLS OF MEDICINE	191043735	UNITED STATES	N	12/25/17 0:00	11/30/18 0:00	273	Non-SBIR/STTR	2018	248987	NIAAA	247180	#N/A
NIAAA	10614148	9/9/22	PA-18-398	4R00AA027835-03	4	R00	AA	27835	3		LORANG-LEINS, DOMINIQUE	9/12/22	8/31/25	ZAA1-SRC(99)	10558576	1	PHARMACOLOGY	829868723	G389MFAYJNG9	829868723	G389MFAYJNG9	US	35.090968	-106.617544	10021612	U OF NEW MEXICO HEALTH SCI CTR	1656	Non-Elite	female	98	ALBUQUERQUE	NM	SCHOOLS OF PHARMACY	871310001	UNITED STATES	N	9/12/22	8/31/23	273	Non-SBIR/STTR	2022	249000	NIAAA	181203	coastal
NHLBI	9733504	7/15/18 0:00	PA-15-083	4R00HL131866-04	4	R00	HL	131866	4		KALANTARI, ROYA	8/15/16 0:00	6/30/21 0:00	NSS	11646601	7	INTERNAL MEDICINE/MEDICINE	63690705	YND4PLMC9AN7	63690705	YND4PLMC9AN7	US	33.50591	-86.799772	1288803	U OF ALABAMA AT BIRMINGHAM		Non-Elite	male	100	BIRMINGHAM	AL	SCHOOLS OF MEDICINE	352940001	UNITED STATES	N	7/15/18 0:00	6/30/19 0:00	837	Non-SBIR/STTR	2018	249000	NHLBI	167677	#N/A
NHLBI	9022589	7/24/15 0:00	PA-11-197	4R00HL118154-03	4	R00	HL	118154	3		GALIS, ZORINA S	12/12/13 0:00	6/30/18 0:00	NSS	8624529	2	MISCELLANEOUS	161202122	LCLSJAGTNZQ7	161202122	LCLSJAGTNZQ7	US	43.068519	-89.400858	578503	U OF WISCONSIN MADISON	3412	Elite	female	97	MADISON	WI	SCHOOLS OF EDUCATION	537151218	UNITED STATES	N	8/1/15 0:00	6/30/16 0:00	837	Non-SBIR/STTR	2015	249000	NHLBI	184222	#N/A
NCI	10523143	12/2/21	PA-19-130	4R00CA241367-03	4	R00	CA	241367	3		MAAS, STEFAN	3/4/20	11/30/24	Transition to Independence Study Section (I)[NCI-I]	14449867	1	BIOCHEMISTRY	183710748	NHV3GTWSALA7	183710748	NHV3GTWSALA7	US	32.786754	-79.947265	7575301	MED U OF SOUTH CAROLINA	157	Non-Elite	male	98	CHARLESTON	SC	SCHOOLS OF MEDICINE	294074636	UNITED STATES	N	12/2/21	11/30/22	398	Non-SBIR/STTR	2022	249000	NCI	178717	coastal
NIGMS	8213191	1/28/11 0:00	PA-07-297	4R00GM087550-03	4	R00	GM	87550	3		ECKSTRAND, IRENE A	3/1/09 0:00	1/31/14 0:00	NSS	8628838	10	CHEMISTRY	170230239	V6AFQPN18437	170230239	V6AFQPN18437	US	30.291188	-97.737568	578403	U OF TEXAS AT AUSTIN		Non-Elite	male	100	AUSTIN	TX	SCHOOLS OF ARTS AND SCIENCES	787121139	UNITED STATES	N	2/1/11 0:00	1/31/12 0:00	859	Non-SBIR/STTR	2011	249000	NIGMS		#N/A
NIBIB	9274397	6/30/16 0:00	PA-11-197	4R00EB016689-04	4	R00	EB	16689	4		LIU, GUOYING	7/1/16 0:00	3/31/19 0:00	NSS	10326474	8	Unavailable	73130411	FLJ7DQKLL226	73130411	FLJ7DQKLL226	US	42.363198	-71.068772	4907701	MASSACHUSETTS GENERAL HOSP		Elite	male	99	BOSTON	MA	Independent Hospitals	21142621	UNITED STATES	N	7/1/16 0:00	3/31/17 0:00	286	Non-SBIR/STTR	2016	249000	NIBIB	145614	coastal
NIDCR	9811478	12/10/18 0:00	PA-15-083	4R00DE026239-03	4	R00	DE	26239	3		STEIN, KATHRYN K	1/1/19 0:00	12/31/21 0:00	NSS	11324537	1	Unavailable	71284913	JZD1HLM2ZU83	71284913	JZD1HLM2ZU83	US	39.140663	-84.501007	615001	CINCINNATI CHILDRENS HOSP MED CTR		Non-Elite	female	97	CINCINNATI	OH	Independent Hospitals	452293039	UNITED STATES	N	1/1/19 0:00	12/31/19 0:00	121	Non-SBIR/STTR	2019	249000	NIDCR	167736	coastal
NIAAA	9049646	4/27/15 0:00	PA-11-197	4R00AA021782-03	4	R00	AA	21782	3		GRANDISON, LINDSEY	12/1/12 0:00	4/30/18 0:00	NSS	9178740	3	ANATOMY/CELL BIOLOGY	2604817	XF3XM9642N96	2604817	XF3XM9642N96	US	39.954073	-75.186541	2205901	DREXEL U		Non-Elite	female	98	PHILADELPHIA	PA	SCHOOLS OF MEDICINE	191043735	UNITED STATES	N	5/1/15 0:00	4/30/16 0:00	273	Non-SBIR/STTR	2015	248999	NIAAA	159105	#N/A
NCI	10445555	8/5/21 0:00	PA-16-193	4R00CA226387-03	4	R00	CA	226387	3		WITKIN, KEREN L	4/1/18 0:00	##########	Transition to Independence Study Section (I)[NCI-I]	14783477	7	Unavailable	118069611	J19ZXYATJLT3	118069611	J19ZXYATJLT3	US	33.452982	-112.06631	10001715	TRANSLATIONAL GENOMICS RES INST		Non-Elite	male	93	PHOENIX	AZ	Other Domestic Non-Profits	850042274	UNITED STATES	N	8/1/21 0:00	##########	398	Non-SBIR/STTR	2021	248999	NCI	129687	coastal
NCI	8616114	2/27/13 0:00	PA-09-036	4R00CA139006-03	4	R00	CA	139006	3		SATHYAMOORTHY, NEERAJA	3/1/12 0:00	2/29/16 0:00	NSS	9484773	9	Unavailable	800772139	S3GMKS8ELA16	800772139	S3GMKS8ELA16	US	29.706319	-95.397195	578407	U OF TX MD ANDERSON CAN CTR		Non-Elite	male	55	HOUSTON	TX	Domestic Higher Education	770304009	UNITED STATES	N	3/1/13 0:00	2/28/14 0:00	396	Non-SBIR/STTR	2013	234059	NCI	146287	#N/A
NIA	9736903	9/7/18 0:00	PA-15-083	4R00AG052642-03	4	R00	AG	52642	3		NIELSEN, LISBETH	9/1/16 0:00	5/31/21 0:00	NSS	11536120	3	DENTISTRY	969663814	NNFQH1JAPEP3	969663814	NNFQH1JAPEP3	US	29.643443	-82.349637	513806	U OF FLORIDA		Non-Elite	female	98	GAINESVILLE	FL	SCHOOLS OF DENTISTRY/ORAL HYGN	326115500	UNITED STATES	N	9/15/18 0:00	5/31/19 0:00	866	Non-SBIR/STTR	2018	248936	NIA	163237	coastal
NIDDK	8532426	11/13/12 0:00	PA-11-197	4R00DK084122-03	4	R00	DK	84122	3		BISHOP, TERRY ROGERS	9/1/12 0:00	11/30/15 0:00	NSS	9612892	1	PATHOLOGY	1785542	E3FDXZ6TBHW3	1785542	E3FDXZ6TBHW3	US	41.826136	-71.404513	1003201	BROWN U	720	Elite	male	99	PROVIDENCE	RI	SCHOOLS OF MEDICINE	29034202	UNITED STATES	N	12/1/12 0:00	11/30/13 0:00	847	Non-SBIR/STTR	2013	249000	NIDDK	175902	coastal
NICHD	10660038	8/11/22	PA-18-398	4R00HD097306-03	4	R00	HD	97306	3		TAYMANS, SUSAN	9/1/22	8/31/25	ZHD1-SRC(99)	11949794	20	NONE	800189185	U44ZMVYU52U6	800189185	U44ZMVYU52U6	US	29.567119	-98.605723	578416	U OF TEXAS SAN ANTONIO		Non-Elite	female	94	SAN ANTONIO	TX	SCHOOLS OF ARTS AND SCIENCES	782491644	UNITED STATES	N	9/1/22	8/31/23	865	Non-SBIR/STTR	2022	248657	NICHD	176438	#N/A
NIGMS	9115756	8/26/15 0:00	PA-11-197	4R00GM110121-03	4	R00	GM	110121	3		CHIN, JEAN	4/1/14 0:00	8/31/18 0:00	NSS	10309536	23	NONE	872612445	G56PUALJ3KT5	872612445	CCV3WG2JG248; D4H1NV4APKP3; ELS2M3C6V2S5; EQA8NBEN9WD5; FFAZGE9NH3M8; G56PUALJ3KT5; K6JRCJJXFET1; M8FBSLHASMT3; P4LRVQT1H4K5; PJUVN8AT5416; RT1JPM9UMGM5; ZBMGUAZYFGC4; ZMP8BDLJTUW9	US	42.438	-76.4625	1514802	CORNELL U	1492	Elite	male	99	ITHACA	NY	ORGANIZED RESEARCH UNITS	148502820	UNITED STATES	N	9/1/15 0:00	8/31/16 0:00	859	Non-SBIR/STTR	2015	248998	NIGMS	154657	#N/A
NHLBI	9656205	3/25/18 0:00	PA-15-083	4R00HL132882-03	4	R00	HL	132882	3		SHI, YANG	8/15/16 0:00	3/31/21 0:00	NSS	11768776	11	OTHER BASIC SCIENCES	135781701	M5QFLTCTSQN6	135781701	M5QFLTCTSQN6	US	41.502657	-81.622127	10000858	CLEVELAND CLINIC LERNER COM CWRU		Non-Elite	female	98	CLEVELAND	OH	OVERALL MEDICAL	441950001	UNITED STATES	N	4/1/18 0:00	3/31/19 0:00	837	Non-SBIR/STTR	2018	249000	NHLBI	155625	coastal
NIMH	10439967	##########	PA-18-398	4R00MH116100-03	4	R00	MH	116100	3		ROSSI, ANDREW	##########	##########	NSS	14378611	5	PSYCHOLOGY	965717143	GTNBNWXJ12D5	965717143	DWH7MSXKA2A8; GTNBNWXJ12D5	US	36.143381	-86.803365	8721001	VANDERBILT U		Non-Elite	male	97	Nashville	TN	SCHOOLS OF ARTS AND SCIENCES	372032408	UNITED STATES	N	7/15/21 0:00	##########	242	Non-SBIR/STTR	2021	248995	NIMH	177025	#N/A
NHLBI	10516397	12/21/21	PA-18-398	4R00HL144822-03	4	R00	HL	144822	3		DIXIT, SHILPY	1/1/22	12/31/24	NSS	15005884	1	Unavailable	71284913	JZD1HLM2ZU83	71284913	JZD1HLM2ZU83	US	39.140663	-84.501007	615001	CINCINNATI CHILDRENS HOSP MED CTR		Non-Elite	male	97	CINCINNATI	OH	Independent Hospitals	452293039	UNITED STATES	N	1/1/22	12/31/22	233	Non-SBIR/STTR	2022	249000	NHLBI	160537	coastal
NHLBI	8776045	3/7/14 0:00	PA-11-197	4R00HL114732-03	4	R00	HL	114732	3		WELNIAK, LISBETH A	3/10/14 0:00	2/28/17 0:00	NSS	10972665	1	INTERNAL MEDICINE/MEDICINE	68552207	L6NFUM28LQM5	68552207	L6NFUM28LQM5	US	38.664368	-90.323797	9083901	WASHINGTON U		Non-Elite	male	99	SAINT LOUIS	MO	SCHOOLS OF MEDICINE	631304862	UNITED STATES	N	3/10/14 0:00	2/28/15 0:00	837	Non-SBIR/STTR	2014	247838	NHLBI	164762	#N/A
NIA	7743670	2/6/09 0:00		4R00AG029723-03	4	R00	AG	29723	3		FINKELSTEIN, DAVID B	8/1/07 0:00	1/31/12 0:00	NSS	8628166	32	BIOLOGY	1981133	D33QGS3Q3DJ3	1981133	D33QGS3Q3DJ3	US	32.844347	-96.785695	7645601	SOUTHERN METHODIST U	486	Non-Elite	male	99	DALLAS	TX	SCHOOLS OF ARTS AND SCIENCES	752750302	UNITED STATES	N	2/15/09 0:00	1/31/10 0:00	866	Non-SBIR/STTR	2009	249000	NIA		coastal
NIA	7915904	9/14/09 0:00		4R00AG031182-02	4	R00	AG	31182	2		FINKELSTEIN, DAVID B	9/15/09 0:00	8/31/12 0:00	NSS	8906824	3	INTERNAL MEDICINE/MEDICINE	42250712	GM1XX56LEP58	42250712	GM1XX56LEP58	US	39.953462	-75.193983	6463801	U OF PENNSYLVANIA		Elite	male	99	PHILADELPHIA	PA	SCHOOLS OF MEDICINE	191046205	UNITED STATES	N	9/15/09 0:00	8/31/10 0:00	866	Non-SBIR/STTR	2009	249000	NIA		#N/A
NIAID	10654973	9/21/22	PA-19-130	4R00AI148587-03	4	R00	AI	148587	3		MILLS, MELODY	7/16/20	8/31/24	ZAI1-SRC(99)	78745763	5	VETERINARY SCIENCES	41485301	XRJSGX384TD6	41485301	XRJSGX384TD6	US	46.728892	-117.155742	9082001	WASHINGTON STATE U	838	Non-Elite	male	56	PULLMAN	WA	SCHOOLS OF VETERINARY MEDICINE	991641060	UNITED STATES	N	9/21/22	8/31/23	855	Non-SBIR/STTR	2022	249000	NIAID	162745	coastal
NHLBI	9203673	2/10/16 0:00	PA-11-197	4R00HL121160-03	4	R00	HL	121160	3		WONG, RENEE P	9/16/14 0:00	1/31/19 0:00	NSS	10740874	8	PHYSIOLOGY	193247145	R28EKN92ZTZ9	193247145	R28EKN92ZTZ9	US	42.653979	-84.492032	5245901	MICHIGAN STATE U		Non-Elite	male	99	EAST LANSING	MI	SCHOOLS OF MEDICINE	488242600	UNITED STATES	N	2/15/16 0:00	1/31/17 0:00	837	Non-SBIR/STTR	2016	249000	NHLBI	222163	#N/A
NIMH	8319707	9/20/11 0:00		4R00MH083887-03	4	R00	MH	83887	3		HILL, LAUREN D	9/21/11 0:00	6/30/14 0:00	NSS	6434939	13	PSYCHOLOGY	71036636	CSSJGCRUZ9F3	71036636	CSSJGCRUZ9F3	US	40.851028	-73.930643	10024748	YESHIVA U		Non-Elite	female	98	NEW YORK	NY	GRADUATE SCHOOLS	100333201	UNITED STATES	N	9/21/11 0:00	6/30/12 0:00	242	Non-SBIR/STTR	2011	241639	NIMH		coastal
NIMH	10621405	6/3/22	RFA-NS-19-043	4R00MH126429-02	4	R00	MH	126429	2		VAZIRI, SIAVASH	6/3/22	5/31/25	NSS	15022319	7	NEUROSCIENCES	63690705	YND4PLMC9AN7	63690705	YND4PLMC9AN7	US	33.50591	-86.799772	1288803	U OF ALABAMA AT BIRMINGHAM		Non-Elite	male	81	BIRMINGHAM	AL	SCHOOLS OF MEDICINE	352940001	UNITED STATES	N	6/3/22	5/31/23	242	Non-SBIR/STTR	2022	249000	NIMH	176134	coastal
NIA	8402416	1/30/12 0:00		4R00AG035002-04	4	R00	AG	35002	4		JOSEPH, LYNDON	2/1/12 0:00	1/31/15 0:00	NSS	9739201	14	PUBLIC HEALTH & PREV MEDICINE	110521739		110521739		US	40.85103	-73.844379	9433501	ALBERT EINSTEIN COLL OF MED		Non-Elite	female	99	BRONX	NY	SCHOOLS OF MEDICINE	104611900	UNITED STATES	N	2/1/12 0:00	1/31/13 0:00	866	Non-SBIR/STTR	2012	248888	NIA	152168	#N/A
NIMH	8538552	9/25/12 0:00		4R00MH086616-03	4	R00	MH	86616	3		FRIEDMAN-HILL, STACIA	9/25/12 0:00	8/31/15 0:00	NSS	9517539	2	PSYCHOLOGY	616680757	CL8JHK1LN291	616680757	CL8JHK1LN291	US	30.028569	-90.065865	577903	LOUISIANA STATE U OF NEW ORLEANS		Non-Elite	female	80	NEW ORLEANS	LA	SCHOOLS OF ARTS AND SCIENCES	701483520	UNITED STATES	N	9/25/12 0:00	8/31/13 0:00	242	Non-SBIR/STTR	2012	248994	NIMH	187400	#N/A
NICHD	10081285	2/28/20 0:00	PA-16-193	4R00HD093873-03	4	R00	HD	93873	3		FEHR, TUBA HALISE	2/28/20 0:00	1/31/23 0:00	NSS	12092412	5	GENETICS	22254226	H6D6JMXJXDE6	22254226	H6D6JMXJXDE6	US	41.734182	-72.793791	1506603	U OF CONNECTICUT SCH OF MED/DNT	1970	Non-Elite	male	98	FARMINGTON	CT	SCHOOLS OF MEDICINE	60305335	UNITED STATES	N	2/28/20 0:00	1/31/21 0:00	865	Non-SBIR/STTR	2020	249000	NICHD	227214	coastal
NIGMS	9620141	3/27/18 0:00	PA-15-083	4R00GM120453-02	4	R00	GM	120453	2		KRASNEWICH, DONNA M	9/1/16 0:00	12/31/20 0:00	NSS	9629492	5	GENETICS	22254226	H6D6JMXJXDE6	22254226	H6D6JMXJXDE6	US	41.734182	-72.793791	1506603	U OF CONNECTICUT SCH OF MED/DNT		Non-Elite	female	98	FARMINGTON	CT	SCHOOLS OF MEDICINE	60305335	UNITED STATES	N	4/1/18 0:00	12/31/18 0:00	859	Non-SBIR/STTR	2018	249000	NIGMS	240324	coastal
NIAMS	10512803	12/23/21	PA-20-188	4R00AR078205-02	4	R00	AR	78205	2		PARK, HEIYOUNG	1/1/22	12/31/24	NSS	15164343	12	INTERNAL MEDICINE/MEDICINE	121911077	M5SZJ6VHUHN8	121911077	M5SZJ6VHUHN8	US	40.669895	-73.974354	5998304	NEW YORK U SCH OF MED	5268	Elite	male	99	NEW YORK	NY	SCHOOLS OF MEDICINE	10016	UNITED STATES	N	1/1/22	12/31/22	846	Non-SBIR/STTR	2022	249000	NIAMS	146902	coastal
NHLBI	9513783	8/5/17 0:00	PA-15-083	4R00HL133453-03	4	R00	HL	133453	3		QASBA, PANKAJ	8/15/15 0:00	8/31/20 0:00	NSS	11086990	4	VETERINARY SCIENCES	5309844	DQDBM7FGJPC5	5309844	DQDBM7FGJPC5	US	42.022225	-93.639475	3974801	IOWA STATE U		Non-Elite	male	99	AMES	IA	SCHOOLS OF VETERINARY MEDICINE	500112025	UNITED STATES	N	9/1/17 0:00	8/31/18 0:00	837	Non-SBIR/STTR	2017	249000	NHLBI	167666	#N/A
NIDA	8898930	9/3/14 0:00	PA-11-197	4R00DA033373-03	4	R00	DA	33373	3		RADMAN, THOMAS C	9/15/14 0:00	8/31/17 0:00	NSS	9713925	6	Unavailable	939017877	H1HYA8Z1NTM5	939017877	H1HYA8Z1NTM5	US	38.040959	-84.505885	2793601	U OF KENTUCKY		Non-Elite	male	100	LEXINGTON	KY	Domestic Higher Education	405260001	UNITED STATES	N	9/15/14 0:00	8/31/15 0:00	279	Non-SBIR/STTR	2014	249000	NIDA	176522	#N/A
NINDS	8385715	12/7/11 0:00	PA-07-297	4R00NS065130-03	4	R00	NS	65130	3		STEWART, RANDALL R	12/15/11 0:00	11/30/14 0:00	NSS	9496504	5	PHARMACOLOGY	65391526	JJG6HU8PA4S5	65391526	JJG6HU8PA4S5	US	38.050527	-78.500531	1526402	U OF VIRGINIA		Non-Elite	male	100	CHARLOTTESVILLE	VA	SCHOOLS OF MEDICINE	229044195	UNITED STATES	N	12/15/11 0:00	11/30/12 0:00	853	Non-SBIR/STTR	2012	249000	NINDS	189740	coastal
NCI	7811251	5/22/09 0:00	PA-06-133	4R00CA127462-04	4	R00	CA	127462	4		MOHLA, SURESH	6/1/07 0:00	5/31/12 0:00	ZCA1-RTRB-2(J1)	7253225	3	PATHOLOGY	16060860	YXJGGNC5J269	16060860	YXJGGNC5J269	US	39.026584	-94.636347	1484303	U OF KANSAS MED CTR		Non-Elite	female	98	KANSAS CITY	KS	SCHOOLS OF MEDICINE	661608500	UNITED STATES	N	6/1/09 0:00	5/31/10 0:00	398	Non-SBIR/STTR	2009	249000	NCI		coastal
NIDCD	8183767	11/18/10 0:00	PA-06-133	4R00DC009443-02	4	R00	DC	9443	2		SKLARE, DAN	12/1/10 0:00	11/30/13 0:00	NSS	9075183	98	ANATOMY/CELL BIOLOGY	948108063	KWTAB1GYM4L9	948108063	KWTAB1GYM4L9	US	18.410481	-66.065613	578705	U OF PUERTO RICO MED SCI	630	Non-Elite	female	97	SAN JUAN	PR	SCHOOLS OF MEDICINE	9365067	UNITED STATES	N	12/1/10 0:00	11/30/11 0:00	173	Non-SBIR/STTR	2011	249000	NIDCD		#N/A
NIA	9057785	8/26/15 0:00	PA-11-197	4R00AG047198-03	4	R00	AG	47198	3		KOHANSKI, RONALD A	9/1/15 0:00	5/31/18 0:00	NSS	10702440	31	PHARMACOLOGY	9656273	SZAKFNU35ZX5	9656273	SZAKFNU35ZX5	US	34.051744	-117.261784	4562901	LOMA LINDA U	344	Non-Elite	male	96	LOMA LINDA	CA	SCHOOLS OF PHARMACY	923500225	UNITED STATES	N	9/1/15 0:00	5/31/16 0:00	866	Non-SBIR/STTR	2015	248907	NIA	157536	#N/A
NIDA	9737070	8/24/18 0:00	PA-15-083	4R00DA041445-03	4	R00	DA	41445	3		SORENSEN, ROGER	9/1/18 0:00	8/31/21 0:00	NSS	9682281	45	PHYSIOLOGY	46705849	MJC5FCYQTPE6	46705849	MJC5FCYQTPE6	US	33.64852	-117.82136	577504	U OF CALIFORNIA IRVINE		Non-Elite	male	99	IRVINE	CA	SCHOOLS OF MEDICINE	926970001	UNITED STATES	N	9/1/18 0:00	8/31/19 0:00	279	Non-SBIR/STTR	2018	249000	NIDA	161165	#N/A
NLM	8471822	6/6/12 0:00		4R00LM010943-02	4	R00	LM	10943	2		SIM, HUA-CHUAN	7/1/12 0:00	6/30/15 0:00	NSS	9582918	18	MISCELLANEOUS	4514360	MKAGLD59JRL1	4514360	MKAGLD59JRL1	US	40.440909	-79.959125	2059802	U OF PITTSBURGH AT PITTSBURGH		Elite	female	98	PITTSBURGH	PA	SCHOOLS OF MEDICINE	152133320	UNITED STATES	N	7/1/12 0:00	6/30/13 0:00	879	Non-SBIR/STTR	2012	224100	NLM	148380	#N/A
NIA	8442059	8/9/12 0:00	PA-11-197	4R00AG034214-03	4	R00	AG	34214	3		MILLER, MARILYN	8/15/12 0:00	7/31/15 0:00	NSS	9320106	7	INTERNAL MEDICINE/MEDICINE	605799469	HD1WMN6945W6	605799469	HD1WMN6945W6	US	47.660307	-122.315168	9087701	U OF WASHINGTON		Elite	female	92	SEATTLE	WA	SCHOOLS OF MEDICINE	981959472	UNITED STATES	N	8/15/12 0:00	7/31/13 0:00	866	Non-SBIR/STTR	2012	245285	NIA	194671	#N/A
NIGMS	10221864	8/27/20 0:00	PA-16-193	4R00GM126141-03	4	R00	GM	126141	3		GAILLARD, SHAWN R	9/1/20 0:00	8/31/23 0:00	NSS	9210079	98	Unavailable	72641707	ZQ12LY4L5H39	72641707	ZQ12LY4L5H39	US	38.909422	-77.035949	1166601	CARNEGIE INSTITUTION OF WASHINGTON DC		Non-Elite	female	99	WASHINGTON	DC	Research Institutes	200051305	UNITED STATES	N	9/1/20 0:00	8/31/21 0:00	859	Non-SBIR/STTR	2020	249000	NIGMS	154151	#N/A
NIBIB	9405681	3/10/17 0:00	PA-14-042	4R00EB018994-03	4	R00	EB	18994	3		KING, RANDY LEE	4/1/17 0:00	1/31/20 0:00	NSS	11645994	7	PUBLIC HEALTH & PREV MEDICINE	1910777	FTMTDMBR29C7	1910777	FTMTDMBR29C7	US	39.325256	-76.605131	4134401	JOHNS HOPKINS U	3325	Elite	unknown		BALTIMORE	MD	SCHOOLS OF PUBLIC HEALTH	212182680	UNITED STATES	N	4/1/17 0:00	1/31/18 0:00	286	Non-SBIR/STTR	2017	249157	NIBIB	169994	#N/A
NIBIB	8719546	8/28/13 0:00	PA-10-063	4R00EB013630-03	4	R00	EB	13630	3		HUNZIKER, ROSEMARIE	9/1/13 0:00	8/31/16 0:00	NSS	9846288	5	ENGINEERING (ALL TYPES)	965717143	GTNBNWXJ12D5	965717143	DWH7MSXKA2A8; GTNBNWXJ12D5	US	36.143381	-86.803365	8721001	VANDERBILT U		Non-Elite	male	98	Nashville	TN	BIOMED ENGR/COL ENGR/ENGR STA	372032408	UNITED STATES	N	9/1/13 0:00	8/31/14 0:00	286	Non-SBIR/STTR	2013	248859	NIBIB	161856	coastal
NIDDK	9732689	8/27/18 0:00	PA-16-193	4R00DK115879-02	4	R00	DK	115879	2		GREENWEL, PATRICIA	9/1/18 0:00	7/31/21 0:00	NSS	11091163	5	MICROBIOLOGY/IMMUN/VIROLOGY	82359691	LN53LCFJFL45	82359691	LN53LCFJFL45	US	42.369697	-71.11193	3212901	HARVARD U	1627	Elite	male	100	CAMBRIDGE	MA	SCHOOLS OF ARTS AND SCIENCES	21385369	UNITED STATES	N	9/1/18 0:00	7/31/19 0:00	847	Non-SBIR/STTR	2018	249000	NIDDK	147337	coastal
NIGMS	10665915	9/1/22	PA-19-130	4R00GM138896-03	4	R00	GM	138896	3		SESMA, MICHAEL A	9/1/22	8/31/25	ZGM1-SRC(99)	10726550	3	CHEMISTRY	832127323	DLWBSLWAJWR1	832127323	DLWBSLWAJWR1	US	39.999598	-83.033131	6218701	OHIO STATE U		Non-Elite	male	99	COLUMBUS	OH	SCHOOLS OF ARTS AND SCIENCES	432101016	UNITED STATES	N	9/1/22	8/31/23	859	Non-SBIR/STTR	2022	249000	NIGMS	180168	#N/A
NCI	9477858	7/11/17 0:00	PA-14-042	4R00CA194192-03	4	R00	CA	194192	3		SPALHOLZ, BARBARA A	8/17/15 0:00	12/31/19 0:00	NSS	12270014	7	BIOCHEMISTRY	5436803	KG76WYENL5K1	5436803	KG76WYENL5K1	US	42.050479	-87.680046	6144650	NORTHWESTERN U		Elite	male	98	CHICAGO	IL	SCHOOLS OF MEDICINE	606114579	UNITED STATES	N	7/11/17 0:00	12/31/17 0:00	396	Non-SBIR/STTR	2017	249000	NCI	161777	#N/A
NIGMS	8041511	4/30/10 0:00	PA-07-297	4R00GM085013-03	4	R00	GM	85013	3		HAMLET, MICHELLE R	8/1/08 0:00	4/30/13 0:00	NSS	6938740	2	GENETICS	603847393	MQE2JHHJW9Q8	603847393	MQE2JHHJW9Q8	US	42.2802	-71.758245	850903	U OF MASSACHUSETTS MED SCH WORCESTER		Non-Elite	female	98	WORCESTER	MA	SCHOOLS OF MEDICINE	16550002	UNITED STATES	N	5/1/10 0:00	4/30/11 0:00	859	Non-SBIR/STTR	2010	249000	NIGMS		#N/A
NCI	8948894	1/23/15 0:00	PA-11-197	4R00CA178207-03	4	R00	CA	178207	3		MIETZ, JUDY	9/13/13 0:00	11/30/17 0:00	NSS	10405896	45	PHARMACOLOGY	46705849	MJC5FCYQTPE6	46705849	MJC5FCYQTPE6	US	33.64852	-117.82136	577504	U OF CALIFORNIA IRVINE		Non-Elite	female	98	IRVINE	CA	SCHOOLS OF MEDICINE	926970001	UNITED STATES	N	12/1/14 0:00	11/30/15 0:00	393	Non-SBIR/STTR	2015	249000	NCI	185505	coastal
NIA	9543009	8/28/17 0:00	PA-14-042	4R00AG049934-03	4	R00	AG	49934	3		GUO, MAX	4/15/15 0:00	5/31/20 0:00	NSS	11789634	37	NONE	72933393	G88KLJR3KYT5	72933393	G88KLJR3KYT5	US	34.017282	-118.281254	7636101	U OF SOUTHERN CALIFORNIA		Non-Elite	female	98	Los Angeles	CA	OTHER SPECIALIZED SCHOOLS	900894304	UNITED STATES	N	9/1/17 0:00	5/31/18 0:00	866	Non-SBIR/STTR	2017	248695	NIA	156190	coastal
NIGMS	8840350	5/20/14 0:00	PA-11-197	4R00GM104148-02	4	R00	GM	104148	2		HAYNES, SUSAN R	3/1/13 0:00	4/30/17 0:00	NSS	10619738	18	Unavailable	9214214	HJD6G4D6TJY5	9214214	HJD6G4D6TJY5	US	37.426852	-122.17047	8046501	STANFORD U		Elite	male	99	STANFORD	CA	Domestic Higher Education	943052004	UNITED STATES	N	5/20/14 0:00	4/30/15 0:00	859	Non-SBIR/STTR	2014	249000	NIGMS	155140	#N/A
NIDCD	8386821	11/23/11 0:00		4R00DC011080-03	4	R00	DC	11080	3		SKLARE, DAN	12/1/11 0:00	11/30/14 0:00	NSS	8843508	13	Unavailable	173995366		173995366		US	37.840095	-122.290943	1799701	ERNEST GALLO CLINIC AND RES CTR		Non-Elite	male	99	EMERYVILLE	CA	Research Institutes	946082007	UNITED STATES	N	12/1/11 0:00	11/30/12 0:00	173	Non-SBIR/STTR	2012	249000	NIDCD	200106	#N/A
NICHD	9540965	8/28/17 0:00	PA-14-042	4R00HD084732-03	4	R00	HD	84732	3		FREUND, LISA S	9/1/17 0:00	6/30/20 0:00	NSS	12353041	10	NONE	49179401	F4N1QNPB95M4	49179401	F4N1QNPB95M4	US	40.81207	-73.954377	1833202	COLUMBIA U NEW YORK MORNINGSIDE		Elite	male	99	NEW YORK	NY	ORGANIZED RESEARCH UNITS	100276900	UNITED STATES	N	9/1/17 0:00	6/30/18 0:00	865	Non-SBIR/STTR	2017	249000	NICHD	216375	#N/A
NIMH	9836909	1/31/19 0:00	PA-16-193	4R00MH112413-03	4	R00	MH	112413	3		GORDON, CHRISTOPHER M	8/23/17 0:00	1/31/22 0:00	NSS	11877060	1	PUBLIC HEALTH & PREV MEDICINE	1785542	E3FDXZ6TBHW3	1785542	E3FDXZ6TBHW3	US	41.826136	-71.404513	1003201	BROWN U		Elite	female	98	PROVIDENCE	RI	SCHOOLS OF PUBLIC HEALTH	29034202	UNITED STATES	N	2/6/19 0:00	1/31/20 0:00	242	Non-SBIR/STTR	2019	249000	NIMH	154200	coastal
NHLBI	8436419	4/12/12 0:00		4R00HL102223-02	4	R00	HL	102223	2		CARLSON, DREW E	4/16/12 0:00	3/31/15 0:00	NSS	9886302	4	GENETICS	608195277	D3LHU66KBLD5	608195277	D3LHU66KBLD5	US	35.9316	-79.057377	578206	U OF NORTH CAROLINA CHAPEL HILL		Elite	male	99	CHAPEL HILL	NC	SCHOOLS OF MEDICINE	275995023	UNITED STATES	N	4/16/12 0:00	3/31/13 0:00	837	Non-SBIR/STTR	2012	248752	NHLBI	173265	coastal
NIA	9352898	9/17/16 0:00	PA-11-197	4R00AG047334-03	4	R00	AG	47334	3		WAGSTER, MOLLY V	9/30/16 0:00	5/31/19 0:00	NSS	8819116	41	PSYCHOLOGY	627797426	MR5QC5FCAVH5	627797426	MR5QC5FCAVH5	US	33.972585	-117.350361	577506	U OF CALIFORNIA RIVERSIDE	907	Non-Elite	female	99	RIVERSIDE	CA	SCHOOLS OF ARTS AND SCIENCES	925210001	UNITED STATES	N	9/30/16 0:00	5/31/17 0:00	866	Non-SBIR/STTR	2016	248525	NIA	160339	coastal
NEI	9771063	9/13/18 0:00	PA-16-077	4R00EY027460-03	4	R00	EY	27460	3		NEUHOLD, LISA	9/30/18 0:00	5/31/21 0:00	NSS	12247748	5	OPHTHALMOLOGY	878648294	GY8NMUZQXVS7	878648294	GY8NMUZQXVS7	US	35.47459	-97.505034	1524003	U OF OKLAHOMA HLTH SCI CTR	862	Non-Elite	female	97	OKLAHOMA CITY	OK	SCHOOLS OF MEDICINE	731043609	UNITED STATES	N	9/30/18 0:00	5/31/19 0:00	867	Non-SBIR/STTR	2018	249000	NEI	171724	coastal
NIA	10437070	##########	PA-18-398	4R00AG061259-03	4	R00	AG	61259	3		MACKIEWICZ, MIROSLAW	##########	##########	NSS	10220037	8	Unavailable	73130411	FLJ7DQKLL226	73130411	FLJ7DQKLL226	US	42.363198	-71.068772	4907701	MASSACHUSETTS GENERAL HOSP		Elite	female	98	BOSTON	MA	Independent Hospitals	21142621	UNITED STATES	N	7/15/21 0:00	##########	866	Non-SBIR/STTR	2021	249000	NIA	156429	coastal
NIDDK	8285172	9/5/11 0:00		4R00DK085145-03	4	R00	DK	85145	3		APPEL, MICHAEL C	9/25/09 0:00	8/31/14 0:00	NSS	9757676	6	ENGINEERING (ALL TYPES)	41096314	MW8JHK6ZYEX8	41096314	MW8JHK6ZYEX8	US	39.745098	-104.837605	1199905	U OF COLORADO DENVER		Non-Elite	male	99	Aurora	CO	BIOMED ENGR/COL ENGR/ENGR STA	800452570	UNITED STATES	N	9/1/11 0:00	8/31/12 0:00	847	Non-SBIR/STTR	2011	249000	NIDDK		coastal
NCI	8827907	5/20/14 0:00	PA-11-197	4R00CA160786-02	4	R00	CA	160786	2		DASCHNER, PHILLIP J	5/20/14 0:00	4/30/17 0:00	NSS	9289171	2	OTHER BASIC SCIENCES	65365041	FKLCLQFBA463	65365041	FKLCLQFBA463	US	32.831421	-83.646907	1477802	MERCER U MACON	399	Non-Elite	female	99	MACON	GA	SCHOOLS OF MEDICINE	312070001	UNITED STATES	N	5/20/14 0:00	4/30/15 0:00	393	Non-SBIR/STTR	2014	249000	NCI	165796	#N/A
NIAAA	9035826	7/3/15 0:00	PA-11-197	4R00AA022385-03	4	R00	AA	22385	3		PARSIAN, ABBAS	9/1/13 0:00	6/30/18 0:00	NSS	8821259	5	PEDIATRICS	65391526	JJG6HU8PA4S5	65391526	JJG6HU8PA4S5	US	38.050527	-78.500531	1526402	U OF VIRGINIA		Non-Elite	female	96	CHARLOTTESVILLE	VA	SCHOOLS OF MEDICINE	229044195	UNITED STATES	N	7/1/15 0:00	6/30/16 0:00	273	Non-SBIR/STTR	2015	246492	NIAAA	156546	#N/A
NCI	9381072	12/5/16 0:00	PA-14-042	4R00CA197762-03	4	R00	CA	197762	3		WATSON, JOANNA M	12/5/16 0:00	11/30/19 0:00	NSS	11639678	7	Unavailable	78200995	HMSNCM57QNR5	78200995	HMSNCM57QNR5	US	47.627342	-122.331593	861001	FRED HUTCHINSON CANCER RES CTR		Elite	female	98	SEATTLE	WA	Research Institutes	981094433	UNITED STATES	N	12/5/16 0:00	11/30/17 0:00	396	Non-SBIR/STTR	2017	249000	NCI	141477	#N/A
NICHD	10580137	3/11/22	PA-19-130	4R00HD098288-03	4	R00	HD	98288	3		BREMER, ANDREW	4/1/22	1/31/25	NSS	11764454	7	Unavailable	30811269	QN6MS4VN7BD1	30811269	QN6MS4VN7BD1	US	42.336107	-71.107481	1080401	BRIGHAM AND WOMENS HOSP		Elite	female	98	BOSTON	MA	Independent Hospitals	21156110	UNITED STATES	N	4/1/22	1/31/23	865	Non-SBIR/STTR	2022	249194	NICHD	152443	#N/A
NIDDK	9309148	8/12/16 0:00	PA-11-197	4R00DK100465-03	4	R00	DK	100465	3		LEE, CHRISTINE G	9/1/16 0:00	8/31/19 0:00	NSS	10936112	6	Unavailable	41096314	MW8JHK6ZYEX8	41096314	MW8JHK6ZYEX8	US	39.745098	-104.837605	1199905	U OF COLORADO DENVER		Non-Elite	female	97	Aurora	CO	Domestic Higher Education	800452570	UNITED STATES	N	9/1/16 0:00	8/31/17 0:00	847	Non-SBIR/STTR	2016	249000	NIDDK	160128	#N/A
NCI	9026753	5/18/15 0:00	PA-11-197	4R00CA177868-02	4	R00	CA	177868	2		DASCHNER, PHILLIP J	4/1/15 0:00	4/30/18 0:00	NSS	10289984	8	PHARMACOLOGY	193247145	R28EKN92ZTZ9	193247145	R28EKN92ZTZ9	US	42.653979	-84.492032	5245901	MICHIGAN STATE U		Non-Elite	male	59	EAST LANSING	MI	SCHOOLS OF MEDICINE	488242600	UNITED STATES	N	5/18/15 0:00	4/30/16 0:00	393	Non-SBIR/STTR	2015	240835	NCI	156896	coastal
NIEHS	9391761	12/21/16 0:00	PA-11-197	4R00ES024570-03	4	R00	ES	24570	3		TYSON, FREDERICK L	1/1/17 0:00	12/31/19 0:00	NSS	6985529	8	MICROBIOLOGY/IMMUN/VIROLOGY	193247145	R28EKN92ZTZ9	193247145	R28EKN92ZTZ9	US	42.653979	-84.492032	5245901	MICHIGAN STATE U		Non-Elite	female	93	EAST LANSING	MI	SCHOOLS OF MEDICINE	488242600	UNITED STATES	N	1/1/17 0:00	12/31/17 0:00	113	Non-SBIR/STTR	2017	249000	NIEHS	160645	coastal
NIGMS	8267761	6/20/11 0:00	PA-07-297	4R00GM088413-03	4	R00	GM	88413	3		SANTANGELO, GEORGE M	8/1/09 0:00	6/30/14 0:00	NSS	6863009	18	GENETICS	4514360	MKAGLD59JRL1	4514360	MKAGLD59JRL1	US	40.440909	-79.959125	2059802	U OF PITTSBURGH AT PITTSBURGH		Elite	female	65	PITTSBURGH	PA	SCHOOLS OF MEDICINE	152133320	UNITED STATES	N	7/1/11 0:00	6/30/12 0:00	859	Non-SBIR/STTR	2011	248999	NIGMS		coastal
NIAMS	8714189	8/26/13 0:00	PA-10-063	4R00AR061469-03	4	R00	AR	61469	3		BAKER, CARL	9/1/13 0:00	8/31/16 0:00	NSS	8760330	7	Unavailable	78200995	HMSNCM57QNR5	78200995	HMSNCM57QNR5	US	47.627342	-122.331593	861001	FRED HUTCHINSON CANCER RES CTR		Elite	male	99	SEATTLE	WA	Research Institutes	981094433	UNITED STATES	N	9/1/13 0:00	8/31/14 0:00	846	Non-SBIR/STTR	2013	249000	NIAMS	212727	coastal
NIDA	10631661	6/22/22	PA-19-130	4R00DA049886-03	4	R00	DA	49886	3		LIN, YU	8/1/20	7/31/25	ZDA1-SXM-M(07)S	15238313	3	PSYCHIATRY	928824473	X59NJBFL8BJ3	928824473	X59NJBFL8BJ3	US	32.328724	-90.175537	5390304	U OF MISSISSIPPI MED CTR	1579	Non-Elite	female	97	JACKSON	MS	SCHOOLS OF MEDICINE	392164500	UNITED STATES	N	8/1/22	7/31/23	279	Non-SBIR/STTR	2022	249000	NIDA	160645	#N/A
NIA	9991334	9/4/19 0:00	PA-16-193	4R00AG058748-03	4	R00	AG	58748	3		WAGSTER, MOLLY V	9/15/19 0:00	5/31/22 0:00	NSS	9574886	5	PSYCHOLOGY	616845814	MXLZGAMFEKN5	616845814	MXLZGAMFEKN5	US	42.366381	-71.254515	925301	BRANDEIS U	335	Elite	female	98	WALTHAM	MA	SCHOOLS OF ARTS AND SCIENCES	24532728	UNITED STATES	N	9/15/19 0:00	5/31/20 0:00	866	Non-SBIR/STTR	2019	248894	NIA	197535	#N/A
NHLBI	10199268	9/3/20 0:00	PA-18-398	4R00HL146951-02	4	R00	HL	146951	2		LIDMAN, KARIN FREDRIKSSON	9/4/20 0:00	6/30/23 0:00	NSS	14124085	1	ENGINEERING (ALL TYPES)	68552207	L6NFUM28LQM5	68552207	L6NFUM28LQM5	US	38.664368	-90.323797	9083901	WASHINGTON U		Non-Elite	male	100	SAINT LOUIS	MO	BIOMED ENGR/COL ENGR/ENGR STA	631304862	UNITED STATES	N	9/4/20 0:00	6/30/21 0:00	837	Non-SBIR/STTR	2020	249000	NHLBI	170873	coastal
NIDDK	9102337	9/15/15 0:00	PA-11-197	4R00DK100736-03	4	R00	DK	100736	3		HAFT, CAROL R	9/15/15 0:00	8/31/18 0:00	NSS	11404616	2	NUTRITION	3387891	FN2YCS2YAUW3	3387891	FN2YCS2YAUW3	US	35.954943	-83.93035	578304	U OF TENNESSEE KNOXVILLE	1269	Non-Elite	male	98	KNOXVILLE	TN	SCH ALLIED HEALTH PROFESSIONS	379964509	UNITED STATES	N	9/15/15 0:00	8/31/16 0:00	847	Non-SBIR/STTR	2015	248999	NIDDK	178646	#N/A
NIMH	8448507	5/3/12 0:00	PA-11-197	4R00MH090236-03	4	R00	MH	90236	3		DESMOND, NANCY L	9/15/10 0:00	4/30/15 0:00	NSS	9979759	27	PSYCHIATRY	52780918	F8THLJQSAF93	52780918	F8THLJQSAF93	US	25.713468	-80.277246	5221250	U OF MIAMI SCH OF MED	1164	Non-Elite	female	98	CORAL GABLES	FL	SCHOOLS OF MEDICINE	331462926	UNITED STATES	N	5/1/12 0:00	4/30/13 0:00	242	Non-SBIR/STTR	2012	249001	NIMH	175563	coastal
NIAMS	9896238	7/18/19 0:00	PA-15-083	4R00AR069094-03	4	R00	AR	69094	3		ZHENG, XINCHENG	7/19/19 0:00	6/30/22 0:00	NSS	12408838	11	OTHER BASIC SCIENCES	135781701	M5QFLTCTSQN6	135781701	M5QFLTCTSQN6	US	41.502657	-81.622127	10000858	CLEVELAND CLINIC LERNER COM CWRU		Non-Elite	female	98	CLEVELAND	OH	SCHOOLS OF MEDICINE	441950001	UNITED STATES	N	7/19/19 0:00	6/30/20 0:00	846	Non-SBIR/STTR	2019	247387	NIAMS	154617	coastal
NEI	10200240	8/27/20 0:00	PA-16-193	4R00EY029329-03	4	R00	EY	29329	3		WIGGS, CHERI	9/30/20 0:00	8/31/23 0:00	NSS	15164831	24	BIOSTATISTICS & OTHER MATH SCI	94878394	G9QBQDH39DF4	94878394	G9QBQDH39DF4	US	34.431306	-119.834277	577509	U OF CALIFORNIA SANTA BARBARA	882	Non-Elite	male	99	SANTA BARBARA	CA	BIOMED ENGR/COL ENGR/ENGR STA	931060001	UNITED STATES	N	9/30/20 0:00	8/31/21 0:00	867	Non-SBIR/STTR	2020	247272	NEI	159016	#N/A
NIAID	9204884	3/2/16 0:00	PA-11-197	4R00AI112691-02	4	R00	AI	112691	2		LOVE, DONA	7/1/14 0:00	2/28/18 0:00	NSS	10249734	52	Unavailable	76364392	FL8UNYTG72D1	76364392	FL8UNYTG72D1	US	39.099845	-77.193698	10004362	J CRAIG VENTER INST INC		Non-Elite	female	97	LA JOLLA	CA	Research Institutes	920373498	UNITED STATES	N	3/2/16 0:00	2/28/17 0:00	855	Non-SBIR/STTR	2016	248999	NIAID	127692	#N/A
NIGMS	9506888	6/30/17 0:00	PA-14-042	4R00GM112982-03	4	R00	GM	112982	3		FLICKER, PAULA F	3/1/15 0:00	6/30/20 0:00	NSS	11182371	12	ANATOMY/CELL BIOLOGY	121911077	M5SZJ6VHUHN8	121911077	M5SZJ6VHUHN8	US	40.669895	-73.974354	5998304	NEW YORK U SCH OF MED		Elite	female	60	NEW YORK	NY	SCHOOLS OF MEDICINE	10016	UNITED STATES	N	7/1/17 0:00	6/30/18 0:00	859	Non-SBIR/STTR	2017	249000	NIGMS	163304	#N/A
NINDS	10311140	##########	PAR-18-814	4R00NS111731-03	4	R00	NS	111731	3		DAVID, KAREN KATE	6/1/19 0:00	##########	ZNS1-SRB-L(15)	10737936	33	BIOCHEMISTRY	92530369	RN64EPNH8JC6	92530369	RN64EPNH8JC6	US	34.070199	-118.45102	577505	U OF CALIFORNIA LOS ANGELES		Elite	female	98	LOS ANGELES	CA	SCHOOLS OF MEDICINE	900952000	UNITED STATES	N	4/1/21 0:00	##########	853	Other Research-Related	2021	248999	NINDS	159615	#N/A
NCRR	7626200	7/30/08 0:00	PA-06-133	4R00RR024110-03	4	R00	RR	24110	3		CHANG, MICHAEL	8/1/08 0:00	7/31/11 0:00	NSS	2084416	20	BIOCHEMISTRY	125084723	VXUFPE4MCZH5	125084723	VXUFPE4MCZH5	US	36.97756	-122.055836	577510	U OF CALIFORNIA SANTA CRUZ	565	Non-Elite	female	100	SANTA CRUZ	CA	SCHOOLS OF ARTS AND SCIENCES	950641077	UNITED STATES	N	8/1/08 0:00	7/31/09 0:00	389	Non-SBIR/STTR	2008	249000	NCRR		#N/A
NIDDK	9188834	2/15/16 0:00	PA-11-197	4R00DK095975-03	4	R00	DK	95975	3		SATO, SHERYL M	2/15/16 0:00	2/14/19 0:00	NSS	10599080	7	INTERNAL MEDICINE/MEDICINE	63690705	YND4PLMC9AN7	63690705	YND4PLMC9AN7	US	33.50591	-86.799772	1288803	U OF ALABAMA AT BIRMINGHAM		Non-Elite	male	100	BIRMINGHAM	AL	SCHOOLS OF MEDICINE	352940001	UNITED STATES	N	2/15/16 0:00	2/14/17 0:00	847	Non-SBIR/STTR	2016	249000	NIDDK	187343	#N/A
NIGMS	10105404	3/20/20 0:00	PA-16-193	4R00GM126145-03	4	R00	GM	126145	3		SHEWMAKER, FRANK PAUL	9/15/17 0:00	3/31/23 0:00	NSS	12241807	3	PHARMACOLOGY	43207562	FL6GV84CKN57	43207562	FL6GV84CKN57	US	41.310925	-72.926428	9420201	YALE U	2272	Elite	female	100	NEW HAVEN	CT	SCHOOLS OF MEDICINE	65208327	UNITED STATES	N	4/1/20 0:00	3/31/21 0:00	859	Non-SBIR/STTR	2020	248999	NIGMS	152686	#N/A
NCI	10547976	2/28/22	PA-19-130	4R00CA245030-02	4	R00	CA	245030	2		MAAS, STEFAN	4/1/20	12/31/24	Transition to Independence Study Section (I)[NCI-I]	11728143	6	PATHOLOGY	41387846	J22LNTMEDP73	41387846	J22LNTMEDP73	US	33.999623	-81.028249	1524302	U OF SOUTH CAROLINA AT COLUMBIA	1443	Non-Elite	male	100	COLUMBIA	SC	SCHOOLS OF MEDICINE	292080001	UNITED STATES	N	1/1/22	12/31/22	396	Non-SBIR/STTR	2022	224097	NCI	156874	coastal
NHLBI	9091785	8/24/15 0:00	PA-11-197	4R00HL122354-03	4	R00	HL	122354	3		CARLSON, DREW E	9/1/15 0:00	8/31/18 0:00	NSS	11824028	4	PATHOLOGY	95439774	FA4VKPTJRLY8	95439774	FA4VKPTJRLY8	US	32.481648	-93.760821	577905	LOUISIANA STATE U HSC SHREVEPORT		Non-Elite	male	98	SHREVEPORT	LA	SCHOOLS OF MEDICINE	711034228	UNITED STATES	N	9/1/15 0:00	8/31/16 0:00	837	Non-SBIR/STTR	2015	249000	NHLBI	171724	coastal
NIDDK	9198641	1/13/16 0:00	PA-14-078	7R00DK095984-04	7	R00	DK	95984	4		BLONDEL, OLIVIER	9/15/15 0:00	8/31/18 0:00	NSS	9369366	1	BIOMEDICAL ENGINEERING	42084434	E2NDENMDUEG8	42084434	E2NDENMDUEG8	US	41.831064	-87.629049	3553001	ILLINOIS INST OF TECHNOLOGY	318	Non-Elite	male	100	CHICAGO	IL	BIOMED ENGR/COL ENGR/ENGR STA	606163717	UNITED STATES	N	1/1/16 0:00	8/31/16 0:00	847	Non-SBIR/STTR	2015	248966	NIDDK	166816	#N/A
NICHD	8624753	6/11/13 0:00	PA-10-063	4R00HD069624-02	4	R00	HD	69624	2		URV, TIINA K	9/10/11 0:00	5/31/16 0:00	NSS	10384717	12	GENETICS	73133571	GNJ7BBP73WE9	73133571	GNJ7BBP73WE9	US	42.275494	-83.743038	1506502	U OF MICHIGAN AT ANN ARBOR		Elite	female	98	ANN ARBOR	MI	SCHOOLS OF MEDICINE	481091276	UNITED STATES	N	6/11/13 0:00	5/31/14 0:00	865	Non-SBIR/STTR	2013	249000	NICHD	202380	coastal
NHLBI	7935758	9/24/09 0:00	PA-07-297	4R00HL091056-03	4	R00	HL	91056	3		LIANG, ISABELLA Y	9/25/09 0:00	7/31/10 0:00	NSS	6490446	3	PHYSIOLOGY	832127323	DLWBSLWAJWR1	832127323	DLWBSLWAJWR1	US	39.999598	-83.033131	6218701	OHIO STATE U		Non-Elite	male	100	COLUMBUS	OH	SCHOOLS OF MEDICINE	432101016	UNITED STATES	N	9/25/09 0:00	7/31/10 0:00	837	Non-SBIR/STTR	2009	249000	NHLBI		coastal
NIA	8129098	9/21/10 0:00	PA-10-063	4R00AG029879-03	4	R00	AG	29879	3		NIELSEN, LISBETH	8/15/08 0:00	7/31/13 0:00	NSS	6069755	12	NONE	73133571	GNJ7BBP73WE9	73133571	GNJ7BBP73WE9	US	42.275494	-83.743038	1506502	U OF MICHIGAN AT ANN ARBOR		Elite	female	92	ANN ARBOR	MI	SCHOOLS OF SOCIAL WELFARE/WORK	481091276	UNITED STATES	N	9/30/10 0:00	7/31/11 0:00	866	Non-SBIR/STTR	2010	249000	NIA		#N/A
NIMH	10578907	3/23/22	PA-18-398	4R00MH119319-03	4	R00	MH	119319	3		PANCHISION, DAVID M	4/1/22	3/31/25	NSS	12669228	5	GENETICS	66469933	S352L5PJLMP8	66469933	S352L5PJLMP8	US	33.791247	-84.3249	2384501	EMORY U		Non-Elite	male	97	ATLANTA	GA	SCHOOLS OF MEDICINE	303221007	UNITED STATES	N	4/1/22	3/31/23	242	Non-SBIR/STTR	2022	248999	NIMH	159105	#N/A
NIAID	10435693	##########	PA-19-130	4R00AI147165-02	4	R00	AI	147165	2		RANALLO, RYAN	9/1/21 0:00	##########	NSS	14876803	12	BIOCHEMISTRY	3403953	NPM2J7MSCF61	3403953	NPM2J7MSCF61	US	40.870717	-77.83415	1524202	PENNSYLVANIA STATE	5280	Non-Elite	male	88	UNIVERSITY PARK	PA	SCHOOLS OF ARTS AND SCIENCES	168027000	UNITED STATES	N	9/1/21 0:00	##########	855	Non-SBIR/STTR	2021	249000	NIAID	157406	coastal
NEI	9904902	5/16/19 0:00	PA-15-083	4R00EY027013-02	4	R00	EY	27013	2		NEUHOLD, LISA	8/1/16 0:00	5/31/22 0:00	NSS	12332483	14	PHARMACOLOGY	69687242	NKAZLXLL7Z91	69687242	NKAZLXLL7Z91	US	28.074039	-82.395963	513807	U OF SOUTH FLORIDA	1557	Non-Elite	male	98	TAMPA	FL	SCHOOLS OF PHARMACY	336172008	UNITED STATES	N	6/1/19 0:00	5/31/20 0:00	867	Non-SBIR/STTR	2019	249000	NEI	205906	#N/A
NCI	9401455	12/26/16 0:00	PA-14-042	4R00CA194318-03	4	R00	CA	194318	3		WITKIN, KEREN L	1/1/17 0:00	12/31/19 0:00	NSS	8762673	6	OBSTETRICS & GYNECOLOGY	41096314	MW8JHK6ZYEX8	41096314	MW8JHK6ZYEX8	US	39.745098	-104.837605	1199905	U OF COLORADO DENVER		Non-Elite	male	99	Aurora	CO	SCHOOLS OF MEDICINE	800452570	UNITED STATES	N	1/1/17 0:00	12/31/17 0:00	393	Non-SBIR/STTR	2017	248999	NCI	172620	#N/A
NHLBI	8037270	5/21/10 0:00	PA-09-036	4R00HL093358-02	4	R00	HL	93358	2		LUNDBERG, MARTHA	5/24/10 0:00	4/30/13 0:00	NSS	8792955	7	ENGINEERING (ALL TYPES)	73134835	WL9FLBRVPJJ7	73134835	WL9FLBRVPJJ7	US	42.40117	-71.125362	8422701	TUFTS U MEDFORD		Non-Elite	female	97	Boston	MA	BIOMED ENGR/COL ENGR/ENGR STA	21111817	UNITED STATES	N	5/24/10 0:00	4/30/11 0:00	837	Non-SBIR/STTR	2010	249000	NHLBI		#N/A
NCI	9150756	12/10/15 0:00	PA-11-197	4R00CA181500-03	4	R00	CA	181500	3		JHAPPAN, CHAMELLI	12/15/15 0:00	11/30/18 0:00	NSS	10310607	6	BIOCHEMISTRY	939017877	H1HYA8Z1NTM5	939017877	H1HYA8Z1NTM5	US	38.040959	-84.505885	2793601	U OF KENTUCKY		Non-Elite	female	98	LEXINGTON	KY	SCHOOLS OF MEDICINE	405260001	UNITED STATES	N	12/15/15 0:00	11/30/16 0:00	393	Non-SBIR/STTR	2016	249000	NCI	193131	coastal
NIAAA	9936802	8/20/19 0:00	PA-16-193	4R00AA025401-03	4	R00	AA	25401	3		XU, BENJAMIN	8/1/19 0:00	7/31/22 0:00	NSS	10208312	3	PSYCHOLOGY	66470972	DMQNDJDHTDG4	66470972	DMQNDJDHTDG4	US	32.602139	-85.508496	1470402	AUBURN U AT AUBURN	1169	Non-Elite	female	98	Auburn	AL	SCHOOLS OF ARTS AND SCIENCES	368325888	UNITED STATES	N	8/1/19 0:00	7/31/20 0:00	273	Non-SBIR/STTR	2019	248999	NIAAA	164900	coastal
NIMH	10660270	8/5/22	PAR-18-814	4R00MH120054-03	4	R00	MH	120054	3		BENNETT, YVONNE	9/1/22	8/31/25	NSS	14382625	8	Unavailable	73130411	FLJ7DQKLL226	73130411	FLJ7DQKLL226	US	42.363198	-71.068772	4907701	MASSACHUSETTS GENERAL HOSP		Elite	female	98	BOSTON	MA	Independent Hospitals	21142621	UNITED STATES	N	9/1/22	8/31/23	242	Non-SBIR/STTR	2022	249000	NIMH	155095	coastal
NINDS	8831805	7/17/14 0:00	PA-11-197	4R00NS078055-03	4	R00	NS	78055	3		FOUNTAIN, JANE W	8/1/14 0:00	7/31/17 0:00	NSS	9801007	7	NEUROSURGERY	5436803	KG76WYENL5K1	5436803	KG76WYENL5K1	US	42.050479	-87.680046	6144650	NORTHWESTERN U		Elite	male	68	CHICAGO	IL	SCHOOLS OF MEDICINE	606114579	UNITED STATES	N	8/1/14 0:00	7/31/15 0:00	853	Non-SBIR/STTR	2014	249000	NINDS	161165	coastal
NIEHS	7531146	2/29/08 0:00	PA-07-297	4R00ES015409-02	4	R00	ES	15409	2		LAWLER, CINDY P	3/1/08 0:00	12/31/10 0:00	NSS	8630221	4	ANATOMY/CELL BIOLOGY	105300446	MLQFL4JSSAA9	105300446	MLQFL4JSSAA9	US	37.549807	-77.452775	353201	VIRGINIA COMMONWEALTH U	2029	Non-Elite	female	97	RICHMOND	VA	SCHOOLS OF MEDICINE	232980568	UNITED STATES	N	3/1/08 0:00	12/31/08 0:00	113	Non-SBIR/STTR	2008	244414	NIEHS		coastal
NIDDK	8655575	8/2/13 0:00	PA-10-063	4R00DK093724-03	4	R00	DK	93724	3		HYDE, JAMES F	8/5/13 0:00	10/23/13 0:00	NSS	10803525	14	Unavailable	110521739		110521739		US	40.85103	-73.844379	9433501	ALBERT EINSTEIN COLL OF MED		Non-Elite	female	92	BRONX	NY	Domestic Higher Education	104611900	UNITED STATES	N	8/5/13 0:00	10/23/13 0:00	847	Non-SBIR/STTR	2013	249000	NIDDK	149102	#N/A
NIA	8719425	8/23/13 0:00	PA-10-063	4R00AG040184-03	4	R00	AG	40184	3		MILLER, MARILYN	9/1/13 0:00	5/31/16 0:00	NSS	9497902	7	Unavailable	605799469	HD1WMN6945W6	605799469	HD1WMN6945W6	US	47.660307	-122.315168	9087701	U OF WASHINGTON		Elite	female	99	SEATTLE	WA	Domestic Higher Education	981959472	UNITED STATES	N	9/1/13 0:00	5/31/14 0:00	866	Non-SBIR/STTR	2013	248414	NIA	162726	coastal
NIGMS	8693055	7/17/13 0:00	PA-10-063	4R00GM100011-03	4	R00	GM	100011	3		ANDERSON, VERNON	3/1/12 0:00	6/30/16 0:00	NSS	7710965	12	Unavailable	3403953	NPM2J7MSCF61	3403953	NPM2J7MSCF61	US	40.870717	-77.83415	1524202	PENNSYLVANIA STATE		Non-Elite	female	96	UNIVERSITY PARK	PA	Domestic Higher Education	168027000	UNITED STATES	N	7/19/13 0:00	6/30/14 0:00	859	Non-SBIR/STTR	2013	249000	NIGMS	177415	#N/A
NIDA	10263439	##########	PA-18-398	4R00DA046522-03	4	R00	DA	46522	3		BERTON, OLIVIER	##########	##########	NSS	14417765	At-Large	PHARMACOLOGY	69690956	FDR5YF2K32X5	69690956	FDR5YF2K32X5	US	41.422527	-105.6072	9412601	U OF WYOMING	531	Non-Elite	female	97	LARAMIE	WY	SCHOOLS OF PHARMACY	820712000	UNITED STATES	N	12/1/20 0:00	##########	279	Non-SBIR/STTR	2021	249000	NIDA	230697	coastal
NIAAA	10426513	##########	PAR-18-814	4R00AA027750-02	4	R00	AA	27750	2		GRAKALIC, IVANA	##########	##########	NSS	10131701	10	PHARMACOLOGY	78795851	QHHJD3X516J9	78795851	QHHJD3X516J9	US	40.738771	-74.190235	10034169	RBHS NEW JERSEY MED SCH		Non-Elite	female	98	NEWARK	NJ	SCHOOLS OF MEDICINE	71032757	UNITED STATES	N	9/20/21 0:00	##########	273	Non-SBIR/STTR	2021	249000	NIAAA	205796	coastal
NIDDK	7920508	8/31/09 0:00	PA-09-036	4R00DK078668-03	4	R00	DK	78668	3		HAMILTON, FRANK A	9/1/09 0:00	6/30/12 0:00	NSS	8795531	52	PEDIATRICS	804355790	UYTTZT6G9DT1	804355790	UYTTZT6G9DT1	US	32.876991	-117.24087	577507	U OF CALIFORNIA SAN DIEGO		Elite	male	99	LA JOLLA	CA	SCHOOLS OF MEDICINE	920930621	UNITED STATES	N	9/1/09 0:00	6/30/10 0:00	847	Non-SBIR/STTR	2009	248999	NIDDK		coastal
NCI	10682653	8/29/22	PA-20-188	4R00CA255844-03	4	R00	CA	255844	3		GRODZINSKI, PIOTR	8/1/22	7/31/25	Transition to Independence Study Section (I)[NCI-I]	11826207	5	ENGINEERING (ALL TYPES)	555917996	KABJZBBJ4B54	555917996	KABJZBBJ4B54	US	44.975143	-93.227003	1450402	U OF MINNESOTA		Non-Elite	female	98	MINNEAPOLIS	MN	BIOMED ENGR/COL ENGR/ENGR STA	554552070	UNITED STATES	N	8/1/22	7/31/23	394	Non-SBIR/STTR	2022	249000	NCI	166532	#N/A
NHLBI	9606253	12/23/17 0:00	PA-15-083	4R00HL129196-03	4	R00	HL	129196	3		CHARETTE, MARC F	5/1/16 0:00	12/31/20 0:00	NSS	78127506	4	PHARMACOLOGY	153890272	SZPJL5ZRCLF4	153890272	SZPJL5ZRCLF4	US	38.948231	-92.327335	578002	U OF MISSOURI COLUMBIA		Non-Elite	female	98	COLUMBIA	MO	SCHOOLS OF MEDICINE	652110001	UNITED STATES	N	1/1/18 0:00	12/31/18 0:00	837	Non-SBIR/STTR	2018	248665	NHLBI	160429	coastal
NICHD	8509350	9/21/12 0:00		4R00HD067678-03	4	R00	HD	67678	3		TAYMANS, SUSAN	3/1/11 0:00	6/30/15 0:00	NSS	8955375	3	VETERINARY SCIENCES	806345617	ED44Y3W6P7B9	806345617	ED44Y3W6P7B9	US	32.232844	-110.959467	490201	U OF ARIZONA		Non-Elite	male	98	TUCSON	AZ	EARTH SCIENCES/RESOURCES	857210158	UNITED STATES	N	9/21/12 0:00	6/30/13 0:00	865	Non-SBIR/STTR	2012	248994	NICHD	177950	coastal
NIA	8326428	9/13/11 0:00	PA-09-036	4R00AG033687-03	4	R00	AG	33687	3		WISE, BRADLEY C	9/15/11 0:00	8/31/14 0:00	Basic Neuroscience of Aging Study Section[NIA-N]	7796262	1	NEUROSCIENCES	183710748	NHV3GTWSALA7	183710748	NHV3GTWSALA7	US	32.786754	-79.947265	7575301	MED U OF SOUTH CAROLINA		Non-Elite	female	99	CHARLESTON	SC	SCHOOLS OF MEDICINE	294074636	UNITED STATES	N	9/15/11 0:00	8/31/12 0:00	866	Non-SBIR/STTR	2011	248253	NIA		#N/A
NIAAA	8305806	9/20/11 0:00	PA-09-036	4R00AA017877-03	4	R00	AA	17877	3		SHIRLEY, MARIELA	9/20/11 0:00	7/31/14 0:00	NSS	9347533	13	PSYCHOLOGY	1962224	M6K6NTJ2MNE5	1962224	M6K6NTJ2MNE5	US	42.357466	-83.065294	9110501	WAYNE STATE U		Non-Elite	male	99	DETROIT	MI	SCHOOLS OF ARTS AND SCIENCES	482024000	UNITED STATES	N	9/20/11 0:00	7/31/12 0:00	273	Non-SBIR/STTR	2011	242961	NIAAA		coastal
NIAID	8795866	3/10/14 0:00	PA-11-197	4R00AI106942-02	4	R00	AI	106942	2		LACOURCIERE, KAREN A	6/1/13 0:00	2/29/16 0:00	NSS	10812148	13	MICROBIOLOGY/IMMUN/VIROLOGY	78861598	C8H9CNG1VBD9	78861598	C8H9CNG1VBD9	US	40.790284	-73.946781	3839801	ICAHN SCH OF MED AT MOUNT SINAI		Non-Elite	male	99	NEW YORK	NY	SCHOOLS OF MEDICINE	100296574	UNITED STATES	N	3/15/14 0:00	2/28/15 0:00	855	Non-SBIR/STTR	2014	249000	NIAID	146903	#N/A
NCI	8616119	3/22/13 0:00	PA-10-063	4R00CA154960-03	4	R00	CA	154960	3		WATSON, JOANNA M	4/1/13 0:00	3/31/16 0:00	NSS	8629666	45	Unavailable	46705849	MJC5FCYQTPE6	46705849	MJC5FCYQTPE6	US	33.64852	-117.82136	577504	U OF CALIFORNIA IRVINE		Non-Elite	male	99	IRVINE	CA	Domestic Higher Education	926970001	UNITED STATES	N	4/1/13 0:00	3/31/14 0:00	396	Non-SBIR/STTR	2013	234060	NCI	190609	coastal
NIMH	10299740	##########	PA-18-398	4R00MH120327-03	4	R00	MH	120327	3		TONELLI, LEONARDO H	1/1/21 0:00	##########	NSS	12081094	5	NEUROSCIENCES	837322494	MNS7B9CVKDN7	837322494	MNS7B9CVKDN7	US	33.753531	-84.384483	676604	GEORGIA STATE U		Non-Elite	female	98	ATLANTA	GA	SCHOOLS OF ARTS AND SCIENCES	303023999	UNITED STATES	N	1/1/21 0:00	##########	242	Non-SBIR/STTR	2021	249000	NIMH	159872	coastal
NHLBI	8326799	9/12/11 0:00		4R00HL098342-02	4	R00	HL	98342	2		ROTHGEB, ANN E	9/15/11 0:00	7/31/14 0:00	NSS	9752499	18	GENETICS	4514360	MKAGLD59JRL1	4514360	MKAGLD59JRL1	US	40.440909	-79.959125	2059802	U OF PITTSBURGH AT PITTSBURGH		Elite	female	98	PITTSBURGH	PA	SCHOOLS OF MEDICINE	152133320	UNITED STATES	N	9/15/11 0:00	7/31/12 0:00	837	Non-SBIR/STTR	2011	249000	NHLBI		#N/A
NINDS	9070088	6/23/15 0:00	PA-11-197	4R00NS080913-03	4	R00	NS	80913	3		LAVAUTE, TIMOTHY M	6/15/15 0:00	3/31/18 0:00	NSS	11106717	37	OTHER BASIC SCIENCES	72933393	G88KLJR3KYT5	72933393	G88KLJR3KYT5	US	34.017282	-118.281254	7636101	U OF SOUTHERN CALIFORNIA		Non-Elite	male	99	Los Angeles	CA	SCHOOLS OF MEDICINE	900894304	UNITED STATES	N	7/1/15 0:00	3/31/16 0:00	853	Non-SBIR/STTR	2015	249000	NINDS	218644	#N/A
NHGRI	10532442	1/14/22	PA-18-398	4R00HG010493-03	4	R00	HG	10493	3		SOFIA, HEIDI J	1/14/22	12/31/24	NSS	14416846	5	Unavailable	79917897	GYLUH9UXHDX5	79917897	GYLUH9UXHDX5	US	36.143784	-86.800995	10040927	VANDERBILT U MED CTR		Non-Elite	male	98	NASHVILLE	TN	Independent Hospitals	372320011	UNITED STATES	N	1/14/22	12/31/22	172	Non-SBIR/STTR	2022	249000	NHGRI	147522	coastal
NIMH	10077920	4/2/20 0:00	PA-16-077	4R00MH111912-03	4	R00	MH	111912	3		BEER, REBECCA LYNN	4/3/20 0:00	1/31/23 0:00	NSS	10445092	13	VETERINARY SCIENCES	41544081	Y8CWNJRCNN91	41544081	Y8CWNJRCNN91	US	40.116857	-88.228755	577704	U OF ILLINOIS AT URBANA CHAMPAIGN	2139	Non-Elite	male	99	CHAMPAIGN	IL	SCHOOLS OF VETERINARY MEDICINE	618207473	UNITED STATES	N	4/3/20 0:00	1/31/21 0:00	242	Non-SBIR/STTR	2020	249000	NIMH	162167	#N/A
NIDCR	10050220	1/13/20 0:00	PA-16-193	4R00DE027719-03	4	R00	DE	27719	3		MCNEALY, TAMARA L	1/13/20 0:00	12/31/22 0:00	NSS	10111583	7	Unavailable	62190616	MZ9DFVC2J1B7	62190616	MZ9DFVC2J1B7	US	42.363539	-71.078724	2705601	FORSYTH INST		Elite	male	100	CAMBRIDGE	MA	Research Institutes	21421200	UNITED STATES	N	1/13/20 0:00	12/31/20 0:00	121	Non-SBIR/STTR	2020	249000	NIDCR	125126	coastal
NIAID	10181261	6/23/20 0:00	PA-18-398	4R00AI139381-02	4	R00	AI	139381	2		GONDRE-LEWIS, TIMOTHY A	8/17/20 0:00	7/31/22 0:00	NSS	14431406	6	Unavailable	153665211	ULMJJBL7ZXX3	153665211	ULMJJBL7ZXX3	US	33.589113	-111.79394	4976104	MAYO CLINIC ARIZONA		Non-Elite	male	74	SCOTTSDALE	AZ	Other Domestic Non-Profits	852595499	UNITED STATES	N	8/17/20 0:00	7/31/21 0:00	855	Non-SBIR/STTR	2020	249000	NIAID	150000	coastal
NHLBI	9606256	2/1/18 0:00	PA-14-042	4R00HL125728-03	4	R00	HL	125728	3		KALANTARI, ROYA	9/18/15 0:00	1/31/21 0:00	NSS	12090673	1	CHEMISTRY	804878247	M746VC6XMNH9	804878247	M746VC6XMNH9	US	40.914561	-73.125169	5992612	STATE U NEW YORK STONY BROOK		Non-Elite	female	99	STONY BROOK	NY	SCHOOLS OF ARTS AND SCIENCES	117943362	UNITED STATES	N	2/1/18 0:00	1/31/19 0:00	837	Non-SBIR/STTR	2018	247449	NHLBI	157367	coastal
NHLBI	9171599	1/11/16 0:00	PA-11-197	4R00HL116778-03	4	R00	HL	116778	3		SHI, YANG	1/15/16 0:00	12/31/18 0:00	NSS	7875227	3	PHYSIOLOGY	832127323	DLWBSLWAJWR1	832127323	DLWBSLWAJWR1	US	39.999598	-83.033131	6218701	OHIO STATE U		Non-Elite	female	97	COLUMBUS	OH	SCHOOLS OF MEDICINE	432101016	UNITED STATES	N	1/15/16 0:00	12/31/16 0:00	837	Non-SBIR/STTR	2016	249000	NHLBI	161688	coastal
NINDS	8448949	5/1/12 0:00	PA-10-063	4R00NS073797-02	4	R00	NS	73797	2		STEWART, RANDALL R	1/1/11 0:00	4/30/15 0:00	NSS	10540110	7	PHYSIOLOGY	1910777	FTMTDMBR29C7	1910777	FTMTDMBR29C7	US	39.325256	-76.605131	4134401	JOHNS HOPKINS U		Elite	male	99	BALTIMORE	MD	SCHOOLS OF MEDICINE	212182680	UNITED STATES	N	5/1/12 0:00	4/30/13 0:00	853	Non-SBIR/STTR	2012	249000	NINDS	203344	#N/A
NICHD	8531389	9/19/12 0:00		4R00HD065957-03	4	R00	HD	65957	3		QUATRANO, LOUIS A	9/30/12 0:00	6/30/15 0:00	NSS	8714925	11	Unavailable	29128969	YH7QN736BQF3	29128969	YH7QN736BQF3	US	40.796906	-74.259164	859402	KESSLER FOUNDATION INC		Non-Elite	female	98	East Hanover	NJ	Research Institutes	79363147	UNITED STATES	N	9/30/12 0:00	6/30/13 0:00	865	Non-SBIR/STTR	2012	248882	NICHD	162668	#N/A
NIA	9791386	9/25/18 0:00	PA-15-083	4R00AG051784-03	4	R00	AG	51784	3		FULDNER, REBECCA A	9/30/18 0:00	6/30/21 0:00	NSS	12557535	26	MICROBIOLOGY/IMMUN/VIROLOGY	38633251	LMCJKRFW5R81	38633251	LMCJKRFW5R81	US	43.003074	-78.785924	5992614	STATE U OF NEW YORK AT BUFFALO		Non-Elite	male	93	AMHERST	NY	SCHOOLS OF MEDICINE	142282567	UNITED STATES	N	9/30/18 0:00	6/30/19 0:00	866	Non-SBIR/STTR	2018	245302	NIA	156592	coastal
NEI	8053016	6/10/10 0:00		4R00EY018680-03	4	R00	EY	18680	3		WIGGS, CHERI	3/1/08 0:00	2/28/13 0:00	NSS	8909234	8	Unavailable	73826000	XQQJEDK7JC21	73826000	XQQJEDK7JC21	US	42.36199	-71.06442	6948301	SCHEPENS EYE RES INST		Elite	female	98	BOSTON	MA	Research Institutes	21142508	UNITED STATES	N	3/1/10 0:00	2/28/11 0:00	867	Non-SBIR/STTR	2010	249000	NEI		#N/A
NIMH	9203690	4/15/16 0:00	PA-11-197	4R00MH101252-03	4	R00	MH	101252	3		ARGUELLO, ALEXANDER	5/1/16 0:00	4/30/19 0:00	NSS	9568863	9	NEUROSCIENCES	3137015	QDE5UHE5XD16	3137015	QDE5UHE5XD16	US	37.233061	-80.421005	8968001	VIRGINIA POLYTECHNIC INST AND ST U	1770	Non-Elite	male	100	BLACKSBURG	VA	SCHOOLS OF ARTS AND SCIENCES	240616100	UNITED STATES	N	5/1/16 0:00	4/30/17 0:00	242	Non-SBIR/STTR	2016	249000	NIMH	193632	coastal
NCI	10669825	9/12/22	PA-19-130	4R00CA248460-03	4	R00	CA	248460	3		KLAUZINSKA, MALGORZATA	9/1/22	8/31/25	Transition to Independence Study Section (I)[NCI-I]	11011862	3	BIOLOGY	42250712	GM1XX56LEP58	42250712	GM1XX56LEP58	US	39.953462	-75.193983	6463801	U OF PENNSYLVANIA		Elite	male	99	PHILADELPHIA	PA	SCHOOLS OF MEDICINE	191046205	UNITED STATES	N	9/1/22	8/31/23	395	Non-SBIR/STTR	2022	249000	NCI	153231	coastal
NHGRI	8898931	8/22/14 0:00	PA-11-197	4R00HG007356-02	4	R00	HG	7356	2		PAZIN, MICHAEL J	9/1/14 0:00	8/31/17 0:00	NSS	10753790	12	BIOSTATISTICS & OTHER MATH SCI	73133571	GNJ7BBP73WE9	73133571	GNJ7BBP73WE9	US	42.275494	-83.743038	1506502	U OF MICHIGAN AT ANN ARBOR		Elite	male	99	ANN ARBOR	MI	SCHOOLS OF MEDICINE	481091276	UNITED STATES	N	9/1/14 0:00	8/31/15 0:00	172	Non-SBIR/STTR	2014	248822	NHGRI	160100	coastal
NHLBI	10657835	8/18/22	PA-20-188	4R00HL157552-03	4	R00	HL	157552	3		BELMADANI, SOUAD	9/1/22	8/31/25	NSS	14155710	5	ENGINEERING (ALL TYPES)	71618789	EYNYSU6L8ZX6	71618789	EYNYSU6L8ZX6	US	40.035569	-75.347751	8943301	VILLANOVA U	641	Non-Elite	female	98	VILLANOVA	PA	BIOMED ENGR/COL ENGR/ENGR STA	190851603	UNITED STATES	N	9/1/22	8/31/23	837	Non-SBIR/STTR	2022	249000	NHLBI	238200	coastal
NICHD	10536905	3/25/22	PA-18-398	4R00HD099269-03	4	R00	HD	99269	3		TAYMANS, SUSAN	8/26/19	2/28/25	NSS	12518878	3	PHYSIOLOGY	58625146	CTLVX9M7AMR4	58625146	CTLVX9M7AMR4	US	36.855732	-76.295467	471501	EASTERN VIRGINIA MED SCH	200	Non-Elite	female	99	NORFOLK	VA	SCHOOLS OF MEDICINE	235011980	UNITED STATES	N	3/25/22	2/28/23	865	Non-SBIR/STTR	2022	249000	NICHD	166000	coastal
NICHD	10085774	6/24/20 0:00	PA-16-193	4R00HD096115-03	4	R00	HD	96115	3		MINEAR, MOLLIE A	6/5/20 0:00	5/31/23 0:00	NSS	12483393	3	Unavailable	147212963	EYMJXLN2MFB4	147212963	EYMJXLN2MFB4	US	39.95251	-82.979302	1495302	RES INST NATIONWIDE CHILDRENS HOSP		Non-Elite	female	95	COLUMBUS	OH	Research Institutes	432052664	UNITED STATES	N	6/5/20 0:00	5/31/21 0:00	865	Non-SBIR/STTR	2020	249000	NICHD	163816	coastal
NIMH	10187747	8/28/20 0:00	PA-16-193	4R00MH117226-03	4	R00	MH	117226	3		RANGEL GOMEZ, MAURICIO	8/1/18 0:00	7/31/23 0:00	NSS	15240208	7	NEUROLOGY	5436803	KG76WYENL5K1	5436803	KG76WYENL5K1	US	42.050479	-87.680046	6144650	NORTHWESTERN U		Elite	male	99	CHICAGO	IL	SCHOOLS OF MEDICINE	606114579	UNITED STATES	N	8/28/20 0:00	7/31/21 0:00	242	Non-SBIR/STTR	2020	246394	NIMH	157595	#N/A
NIAMS	9677711	7/20/18 0:00	PA-15-083	4R00AR068582-03	4	R00	AR	68582	3		WANG, FEI	8/1/18 0:00	7/31/21 0:00	NSS	11897008	7	ORTHOPEDICS	604483045	FBYMGMHW4X95	604483045	FBYMGMHW4X95	US	42.33639	-71.07097	894901	BOSTON U MED CAMPUS	1959	Non-Elite	female	99	BOSTON	MA	SCHOOLS OF MEDICINE	21182340	UNITED STATES	N	8/1/18 0:00	7/31/19 0:00	846	Non-SBIR/STTR	2018	248899	NIAMS	150848	#N/A
NIDCR	10071248	2/18/20 0:00	PA-16-193	4R00DE026824-03	4	R00	DE	26824	3		WANG, LU	3/1/20 0:00	4/30/23 0:00	NSS	11769077	8	Unavailable	73130411	FLJ7DQKLL226	73130411	FLJ7DQKLL226	US	42.363198	-71.068772	4907701	MASSACHUSETTS GENERAL HOSP		Elite	male	99	BOSTON	MA	Independent Hospitals	21142621	UNITED STATES	N	3/1/20 0:00	4/30/21 0:00	121	Non-SBIR/STTR	2020	249000	NIDCR	148214	coastal
NIDCD	9337601	9/16/16 0:00	PA-14-042	4R00DC013828-03	4	R00	DC	13828	3		RIVERA-RENTAS, ALBERTO L	9/1/16 0:00	8/31/19 0:00	NSS	11368543	12	PSYCHOLOGY	73133571	GNJ7BBP73WE9	73133571	GNJ7BBP73WE9	US	42.275494	-83.743038	1506502	U OF MICHIGAN AT ANN ARBOR		Elite	male	99	ANN ARBOR	MI	SCHOOLS OF ARTS AND SCIENCES	481091276	UNITED STATES	N	9/1/16 0:00	8/31/17 0:00	173	Non-SBIR/STTR	2016	249001	NIDCD	197394	coastal
NIGMS	10305313	##########	PA-16-193	4R00GM127752-03	4	R00	GM	127752	3		BENDER, MICHAEL T	##########	##########	NSS	12045047	98	CHEMISTRY	49515844	TF2CMKY1HMX9	49515844	TF2CMKY1HMX9	US	38.905206	-77.07547	2869001	GEORGETOWN U	806	Non-Elite	female	98	WASHINGTON	DC	SCHOOLS OF ARTS AND SCIENCES	200570001	UNITED STATES	N	1/13/21 0:00	##########	859	Non-SBIR/STTR	2021	249000	NIGMS	175928	coastal
NINR	8575617	3/15/13 0:00	PA-10-063	4R00NR012773-03	4	R00	NR	12773	3		HUSS, KAREN	7/1/11 0:00	2/29/16 0:00	NSS	10432618	2	NONE	161202122	LCLSJAGTNZQ7	161202122	LCLSJAGTNZQ7	US	43.068519	-89.400858	578503	U OF WISCONSIN MADISON		Elite	female	98	MADISON	WI	SCHOOLS OF NURSING	537151218	UNITED STATES	N	3/15/13 0:00	2/28/14 0:00	361	Non-SBIR/STTR	2013	236049	NINR	156843	coastal
NIEHS	8587520	2/14/13 0:00		4R00ES020346-03	4	R00	ES	20346	3		GRAY, KIMBERLY A	2/14/13 0:00	1/31/16 0:00	NSS	10484201	1	PUBLIC HEALTH & PREV MEDICINE	1785542	E3FDXZ6TBHW3	1785542	E3FDXZ6TBHW3	US	41.826136	-71.404513	1003201	BROWN U		Elite	male	99	PROVIDENCE	RI	SCHOOLS OF PUBLIC HEALTH	29034202	UNITED STATES	N	2/14/13 0:00	1/31/14 0:00	113	Non-SBIR/STTR	2013	201000	NIEHS	125713	#N/A
NIMHD	9581292	5/14/19 0:00	PA-16-077	4R00MD011304-03	4	R00	MD	11304	3		DAGHER, RADA K	9/27/16 0:00	5/31/22 0:00	ZMD1-XLN(08)	12477188	4	Unavailable	4868105	JJHCMK4NT5N3	4868105	JJHCMK4NT5N3	US	35.9138	-78.848911	6939101	RES TRIANGLE INST		Non-Elite	female	96	RESEARCH TRIANGLE PARK	NC	Research Institutes	277092194	UNITED STATES	N	6/1/19 0:00	5/31/20 0:00	307	Non-SBIR/STTR	2019	248721	NIMHD	139355	#N/A
NIMH	10447233	##########	PAR-18-814	4R00MH123495-02	4	R00	MH	123495	2		CHURCHILL, JAMES D	##########	##########	NSS	10816901	98	PSYCHIATRY	948108063	KWTAB1GYM4L9	948108063	KWTAB1GYM4L9	US	18.410481	-66.065613	578705	U OF PUERTO RICO MED SCI		Non-Elite	male	100	SAN JUAN	PR	SCHOOLS OF MEDICINE	9365067	UNITED STATES	N	8/1/21 0:00	##########	242	Non-SBIR/STTR	2021	248999	NIMH	200999	coastal
NICHD	8547860	1/22/13 0:00		4R00HD060947-03	4	R00	HD	60947	3		LAMAR, CHARISEE A	4/26/10 0:00	1/31/16 0:00	NSS	6719932	52	OBSTETRICS & GYNECOLOGY	804355790	UYTTZT6G9DT1	804355790	UYTTZT6G9DT1	US	32.876991	-117.24087	577507	U OF CALIFORNIA SAN DIEGO		Elite	female	98	LA JOLLA	CA	SCHOOLS OF MEDICINE	920930621	UNITED STATES	N	2/1/13 0:00	1/31/14 0:00	865	Non-SBIR/STTR	2013	249000	NICHD	160645	#N/A
NICHD	9391731	12/27/16 0:00	PA-14-042	4R00HD082280-03	4	R00	HD	82280	3		MUKHOPADHYAY, MAHUA	1/1/17 0:00	12/31/19 0:00	NSS	10727623	3	BIOCHEMISTRY	43207562	FL6GV84CKN57	43207562	FL6GV84CKN57	US	41.310925	-72.926428	9420201	YALE U		Elite	male	99	NEW HAVEN	CT	SCHOOLS OF ARTS AND SCIENCES	65208327	UNITED STATES	N	1/1/17 0:00	12/31/17 0:00	865	Non-SBIR/STTR	2017	249000	NICHD	163164	coastal
NHLBI	9203661	2/1/16 0:00	PA-11-197	4R00HL122360-03	4	R00	HL	122360	3		SCHRAMM, CHARLENE A	5/1/14 0:00	1/31/19 0:00	NSS	9635918	4	PHYSIOLOGY	608195277	D3LHU66KBLD5	608195277	D3LHU66KBLD5	US	35.9316	-79.057377	578206	U OF NORTH CAROLINA CHAPEL HILL		Elite	male	99	CHAPEL HILL	NC	SCHOOLS OF MEDICINE	275995023	UNITED STATES	N	2/1/16 0:00	1/31/17 0:00	837	Non-SBIR/STTR	2016	249000	NHLBI	196316	coastal
NIDA	8974637	1/28/15 0:00	PA-11-197	4R00DA033372-03	4	R00	DA	33372	3		PILOTTE, NANCY S	2/1/15 0:00	1/31/18 0:00	NSS	8403329	2	PHYSIOLOGY	57123192	QD4MGHFDJKU1	57123192	QD4MGHFDJKU1	US	39.980272	-75.157051	8240301	TEMPLE U OF THE COMMONWEALTH		Non-Elite	female	98	PHILADELPHIA	PA	SCHOOLS OF MEDICINE	191226003	UNITED STATES	N	2/1/15 0:00	1/31/16 0:00	279	Non-SBIR/STTR	2015	248317	NIDA	191485	#N/A
NICHD	9859700	3/28/19 0:00	PA-16-077	4R00HD090289-03	4	R00	HD	90289	3		TAYMANS, SUSAN	3/27/19 0:00	2/28/22 0:00	NSS	12238869	18	Unavailable	119132785	J3Z5MNJJ3FZ4	119132785	J3Z5MNJJ3FZ4	US	40.437078	-79.96154	3840801	MAGEE WOMENS RES INST AND FOUNDATION		Non-Elite	male	99	Pittsburgh	PA	Other Domestic Non-Profits	152134572	UNITED STATES	N	3/27/19 0:00	2/29/20 0:00	865	Non-SBIR/STTR	2019	272126	NICHD	198371	#N/A
NEI	8190507	5/24/11 0:00	PA-07-297	4R00EY018683-03	4	R00	EY	18683	3		STEINMETZ, MICHAEL A	6/1/11 0:00	5/31/14 0:00	NSS	8873557	2	PHYSIOLOGY	41027822	EB8ASJBCFER9	41027822	EB8ASJBCFER9	US	43.711386	-72.270611	2021601	DARTMOUTH COLL	628	Elite	female	52	HANOVER	NH	SCHOOLS OF MEDICINE	37551421	UNITED STATES	N	6/1/11 0:00	5/31/12 0:00	867	Non-SBIR/STTR	2011	249000	NEI		coastal
NIGMS	8724085	9/19/13 0:00	PA-11-197	4R00GM099893-02	4	R00	GM	99893	2		REDDY, MICHAEL K	9/1/12 0:00	8/31/16 0:00	NSS	9291924	98	Unavailable	49515844	TF2CMKY1HMX9	49515844	TF2CMKY1HMX9	US	38.905206	-77.07547	2869001	GEORGETOWN U		Non-Elite	male	98	WASHINGTON	DC	Domestic Higher Education	200570001	UNITED STATES	N	9/20/13 0:00	8/31/14 0:00	859	Non-SBIR/STTR	2013	249000	NIGMS	181544	coastal
NIEHS	7879701	9/8/09 0:00	PA-07-297	4R00ES017367-02	4	R00	ES	17367	2		MCALLISTER, KIMBERLY A	9/8/09 0:00	7/31/12 0:00	NSS	8305395	1	BIOLOGY	555456995	HTQ6K6NJFHA6	555456995	HTQ6K6NJFHA6	US	40.823017	-96.673442	578103	U OF NEBRASKA LINCOLN	1222	Non-Elite	female	98	LINCOLN	NE	SCHOOLS OF ARTS AND SCIENCES	685032427	UNITED STATES	N	9/8/09 0:00	7/31/10 0:00	113	Non-SBIR/STTR	2009	248733	NIEHS		coastal
NICHD	9537721	8/28/17 0:00	PA-15-083	4R00HD086255-03	4	R00	HD	86255	3		ALVAREZ, RUBEN P	9/1/17 0:00	8/31/20 0:00	NSS	11641522	12	MISCELLANEOUS	41968306	NX9PXMKW5KW8	41968306	NX9PXMKW5KW8	US	40.729659	-73.997018	5998301	NEW YORK U	5268	Elite	female	98	NEW YORK	NY	SCHOOLS OF EDUCATION	100122300	UNITED STATES	N	9/1/17 0:00	8/31/18 0:00	865	Non-SBIR/STTR	2017	248996	NICHD	157095	#N/A
NHLBI	9722403	8/15/18 0:00	PA-16-193	4R00HL131682-03	4	R00	HL	131682	3		TIGNO, XENIA	5/15/17 0:00	7/31/21 0:00	NSS	9713951	3	Unavailable	147212963	EYMJXLN2MFB4	147212963	EYMJXLN2MFB4	US	39.95251	-82.979302	1495302	RES INST NATIONWIDE CHILDRENS HOSP		Non-Elite	male	99	COLUMBUS	OH	Research Institutes	432052664	UNITED STATES	N	8/15/18 0:00	7/31/19 0:00	837	Non-SBIR/STTR	2018	249000	NHLBI	163816	coastal
NIMH	8520783	9/14/12 0:00		4R00MH091183-02	4	R00	MH	91183	2		GARRIOCK, HOLLY A	9/14/12 0:00	6/30/15 0:00	NSS	6650350	27	PSYCHOLOGY	625174149	RQMFJGDTQ5V3	625174149	RQMFJGDTQ5V3	US	25.713468	-80.277246	5221201	U OF MIAMI CORAL GABLES	1164	Non-Elite	female	98	CORAL GABLES	FL	SCHOOLS OF ARTS AND SCIENCES	331462926	UNITED STATES	N	9/14/12 0:00	6/30/13 0:00	242	Non-SBIR/STTR	2012	235356	NIMH	166237	coastal
NCI	8460336	8/28/12 0:00		4R00CA140728-03	4	R00	CA	140728	3		MERRITT, WILLIAM D	9/1/12 0:00	8/31/15 0:00	NSS	9049556	13	INTERNAL MEDICINE/MEDICINE	78861598	C8H9CNG1VBD9	78861598	C8H9CNG1VBD9	US	40.790284	-73.946781	3839801	ICAHN SCH OF MED AT MOUNT SINAI		Non-Elite	male	100	NEW YORK	NY	SCHOOLS OF MEDICINE	100296574	UNITED STATES	N	9/1/12 0:00	8/31/13 0:00	395	Non-SBIR/STTR	2012	249000	NCI	207095	coastal
NHLBI	9966308	7/31/19 0:00	PA-16-193	4R00HL136695-03	4	R00	HL	136695	3		WANG, WAYNE C	4/1/17 0:00	7/31/22 0:00	NSS	11660285	12	PHARMACOLOGY	73133571	GNJ7BBP73WE9	73133571	GNJ7BBP73WE9	US	42.275494	-83.743038	1506502	U OF MICHIGAN AT ANN ARBOR		Elite	male	100	ANN ARBOR	MI	SCHOOLS OF MEDICINE	481091276	UNITED STATES	N	8/1/19 0:00	7/31/20 0:00	837	Non-SBIR/STTR	2019	248999	NHLBI	159615	coastal
NIDCR	8743616	12/20/13 0:00	PA-11-197	4R00DE022795-03	4	R00	DE	22795	3		LUNSFORD, DWAYNE	1/1/14 0:00	12/31/16 0:00	NSS	9837686	7	ENGINEERING (ALL TYPES)	808264444	E13MDBKHLDB5	808264444	E13MDBKHLDB5	US	40.606735	-75.381089	4459301	LEHIGH U	455	Non-Elite	female	98	BETHLEHEM	PA	BIOMED ENGR/COL ENGR/ENGR STA	180153008	UNITED STATES	N	1/1/14 0:00	12/31/14 0:00	121	Non-SBIR/STTR	2014	246775	NIDCR	159073	#N/A
NIA	10665342	8/30/22	PA-20-188	4R00AG073617-02	4	R00	AG	73617	2		SIMMONS, JANINE M	8/15/21	5/31/25	ZAG1-SRC(99)	12330017	98	PSYCHOLOGY	49515844	TF2CMKY1HMX9	49515844	TF2CMKY1HMX9	US	38.905206	-77.07547	2869001	GEORGETOWN U		Non-Elite	male	58	WASHINGTON	DC	SCHOOLS OF ARTS AND SCIENCES	200570001	UNITED STATES	N	9/1/22	5/31/23	866	Non-SBIR/STTR	2022	249000	NIA	177026	coastal
NHGRI	8898935	8/25/14 0:00	PA-11-197	4R00HG006698-03	4	R00	HG	6698	3		PAZIN, MICHAEL J	8/25/14 0:00	5/31/17 0:00	NSS	10555802	13	BIOCHEMISTRY	78576738	ENBLDJUN4N73	78576738	ENBLDJUN4N73	US	37.868252	-122.258486	577512	U OF CALIFORNIA BERKELEY	1516	Elite	male	99	BERKELEY	CA	ORGANIZED RESEARCH UNITS	947208118	UNITED STATES	N	8/25/14 0:00	5/31/15 0:00	172	Non-SBIR/STTR	2014	249000	NHGRI	138070	coastal
NIGMS	9319427	9/1/16 0:00	PA-11-197	4R00GM111430-03	4	R00	GM	111430	3		PREUSCH, PETER	9/1/14 0:00	7/31/19 0:00	NSS	10854177	2	CHEMISTRY	824910376	FPU6XGFXMBE9	824910376	FPU6XGFXMBE9	US	41.693901	-86.239284	6169301	U OF NOTRE DAME	883	Non-Elite	female	98	NOTRE DAME	IN	SCHOOLS OF ARTS AND SCIENCES	465565708	UNITED STATES	N	9/1/16 0:00	7/31/17 0:00	859	Non-SBIR/STTR	2016	249000	NIGMS	173454	#N/A
NHLBI	8235271	4/8/11 0:00	PA-07-297	4R00HL096166-03	4	R00	HL	96166	3		ERSHOW, ABBY	4/15/11 0:00	3/31/14 0:00	NSS	8087287	6	PATHOLOGY	937727907	SN7KD2UK7GC5	937727907	SN7KD2UK7GC5	US	36.059402	-80.321981	9021205	WAKE FOREST U HEALTH SCI		Non-Elite	male	99	WINSTON-SALEM	NC	SCHOOLS OF MEDICINE	271570001	UNITED STATES	N	4/15/11 0:00	3/31/12 0:00	837	Non-SBIR/STTR	2011	249000	NHLBI		coastal
NCI	9835197	4/3/19 0:00	PA-16-193	4R00CA218603-03	4	R00	CA	218603	3		PERNA, FRANK	4/3/19 0:00	3/31/22 0:00	NSS	11981520	6	NONE	611012324	MWYVQTQ32ME5	611012324	MWYVQTQ32ME5	US	30.403353	-91.122687	577909	LSU PENNINGTON BIOMED RES CTR		Non-Elite	male	98	BATON ROUGE	LA	ORGANIZED RESEARCH UNITS	708084124	UNITED STATES	N	4/3/19 0:00	3/31/20 0:00	394	Non-SBIR/STTR	2019	249000	NCI	168243	coastal
NIEHS	8468251	9/2/12 0:00		4R00ES018892-03	4	R00	ES	18892	3		CHADWICK, LISA	9/1/12 0:00	7/31/15 0:00	NSS	9244139	3	Unavailable	52226800	H4CAHK2RD945	52226800	H4CAHK2RD945	US	45.51201	-122.679476	6297008	PORTLAND STATE U	593	Non-Elite	female	68	PORTLAND	OR	Domestic Higher Education	972070751	UNITED STATES	N	9/1/12 0:00	7/31/13 0:00	113	Non-SBIR/STTR	2012	248967	NIEHS	233842	coastal
NCI	10675117	9/19/22	PA-20-188	4R00CA263021-02	4	R00	CA	263021	2		LIU, YIN	7/8/21	6/30/25	Transition to Independence Study Section (I)[NCI-I]	10983362	4	NEUROSURGERY	44387793	TP7EK8DZV6N5	44387793	TP7EK8DZV6N5	US	36.007766	-78.926475	2221101	DUKE U	3573	Elite	male	99	DURHAM	NC	SCHOOLS OF MEDICINE	277054673	UNITED STATES	N	7/1/22	6/30/23	398	Non-SBIR/STTR	2022	248602	NCI	154411	#N/A
NICHD	10686594	9/1/22	PA-19-090	4R00HD103958-03	4	R00	HD	103958	3		MAHOLMES, VALERIE	9/1/22	8/31/25	NSS	16128528	6	PSYCHOLOGY	41387846	J22LNTMEDP73	41387846	J22LNTMEDP73	US	33.999623	-81.028249	1524302	U OF SOUTH CAROLINA AT COLUMBIA		Non-Elite	female	97	COLUMBIA	SC	SCHOOLS OF ARTS AND SCIENCES	292080001	UNITED STATES	N	9/1/22	8/31/23	865	Non-SBIR/STTR	2022	249000	NICHD	167696	coastal
NHLBI	9967255	8/9/19 0:00	PA-15-083	4R00HL127267-03	4	R00	HL	127267	3		KALANTARI, ROYA	8/15/19 0:00	7/31/22 0:00	NSS	11316340	7	PUBLIC HEALTH & PREV MEDICINE	149617367	UNVDZNFA8R29	149617367	UNVDZNFA8R29	US	42.335306	-71.102775	3212904	HARVARD SCH OF PUBLIC HEALTH		Elite	male	99	BOSTON	MA	SCHOOLS OF PUBLIC HEALTH	21156028	UNITED STATES	N	8/15/19 0:00	7/31/20 0:00	837	Non-SBIR/STTR	2019	249000	NHLBI	156113	coastal
NIDA	8191123	1/31/11 0:00	PA-10-063	4R00DA025182-03	4	R00	DA	25182	3		WU, DA-YU	2/1/11 0:00	1/31/14 0:00	NSS	8204931	1	ANESTHESIOLOGY	68552207	L6NFUM28LQM5	68552207	L6NFUM28LQM5	US	38.664368	-90.323797	9083901	WASHINGTON U		Non-Elite	male	99	SAINT LOUIS	MO	SCHOOLS OF MEDICINE	631304862	UNITED STATES	N	2/1/11 0:00	1/31/12 0:00	279	Non-SBIR/STTR	2011	249000	NIDA		coastal
NHLBI	9967230	8/7/19 0:00	PA-16-193	4R00HL140139-03	4	R00	HL	140139	3		GALIS, ZORINA S	8/15/19 0:00	7/31/22 0:00	NSS	14804761	18	PEDIATRICS	4514360	MKAGLD59JRL1	4514360	MKAGLD59JRL1	US	40.440909	-79.959125	2059802	U OF PITTSBURGH AT PITTSBURGH		Elite	male	63	PITTSBURGH	PA	SCHOOLS OF MEDICINE	152133320	UNITED STATES	N	8/15/19 0:00	7/31/20 0:00	837	Non-SBIR/STTR	2019	249000	NHLBI	184843	#N/A
NIBIB	9536241	8/25/17 0:00	PA-14-042	4R00EB020075-03	4	R00	EB	20075	3		ATANASIJEVIC, TATJANA	9/1/17 0:00	6/30/20 0:00	NSS	11261634	8	Unavailable	73130411	FLJ7DQKLL226	73130411	FLJ7DQKLL226	US	42.363198	-71.068772	4907701	MASSACHUSETTS GENERAL HOSP		Elite	male	99	BOSTON	MA	Independent Hospitals	21142621	UNITED STATES	N	9/1/17 0:00	6/30/18 0:00	286	Non-SBIR/STTR	2017	249000	NIBIB	147275	coastal
NIDCR	8211425	2/7/11 0:00		4R00DE019853-02	4	R00	DE	19853	2		SCHOLNICK, STEVEN	2/1/11 0:00	1/31/14 0:00	NSS	8403350	1	Unavailable	71284913	JZD1HLM2ZU83	71284913	JZD1HLM2ZU83	US	39.140663	-84.501007	615001	CINCINNATI CHILDRENS HOSP MED CTR		Non-Elite	female	98	CINCINNATI	OH	Independent Hospitals	452293039	UNITED STATES	N	2/1/11 0:00	1/31/12 0:00	121	Non-SBIR/STTR	2011	249000	NIDCR		#N/A
NHLBI	7750393	2/12/09 0:00		4R00HL088692-03	4	R00	HL	88692	3		SARKAR, RITA	2/17/09 0:00	1/31/10 0:00	NSS	8228031	9	GENETICS	51113330	FXKMA43NTV21	51113330	FXKMA43NTV21	US	29.70926	-95.400851	481201	BAYLOR COLL OF MED		Non-Elite	male	81	HOUSTON	TX	SCHOOLS OF MEDICINE	770303411	UNITED STATES	N	2/17/09 0:00	1/31/10 0:00	837	Non-SBIR/STTR	2009	249000	NHLBI		coastal
NIEHS	9446067	5/15/17 0:00	PA-14-042	4R00ES024116-03	4	R00	ES	24116	3		GRAY, KIMBERLY A	6/1/17 0:00	5/31/20 0:00	NSS	10118913	1	PUBLIC HEALTH & PREV MEDICINE	41064767	DZ4YCZ3QSPR5	41064767	DZ4YCZ3QSPR5	US	39.129719	-84.520554	1523902	U OF CINCINNATI	2072	Non-Elite	female	88	CINCINNATI	OH	SCHOOLS OF MEDICINE	452210001	UNITED STATES	N	6/1/17 0:00	5/31/18 0:00	113	Non-SBIR/STTR	2017	248321	NIEHS	155809	coastal
NHLBI	10580872	4/18/22	PA-19-129	4R00HL151818-03	4	R00	HL	151818	3		CATANIA, SELEN MURATOGLU	5/1/22	4/30/25	NSS	14647201	6	INTERNAL MEDICINE/MEDICINE	41096314	MW8JHK6ZYEX8	41096314	MW8JHK6ZYEX8	US	39.745098	-104.837605	1199905	U OF COLORADO DENVER		Non-Elite	female	89	Aurora	CO	SCHOOLS OF MEDICINE	800452570	UNITED STATES	N	5/1/22	4/30/23	837	Non-SBIR/STTR	2022	248999	NHLBI	160128	coastal
NIDA	8604779	4/24/13 0:00	PA-10-063	4R00DA029635-03	4	R00	DA	29635	3		WU, DA-YU	5/1/13 0:00	4/30/16 0:00	NSS	9113546	7	Unavailable	604483045	FBYMGMHW4X95	604483045	FBYMGMHW4X95	US	42.33639	-71.07097	894901	BOSTON U MED CAMPUS		Non-Elite	male	99	BOSTON	MA	Domestic Higher Education	21182340	UNITED STATES	N	5/1/13 0:00	4/30/14 0:00	279	Non-SBIR/STTR	2013	248476	NIDA	154511	coastal
NICHD	10389278	##########	PA-18-398	4R00HD097301-03	4	R00	HD	97301	3		GRIFFIN, JAMES	##########	##########	NSS	14938150	3	PUBLIC HEALTH & PREV MEDICINE	98377336	DLUTVJJ15U66	98377336	DLUTVJJ15U66	US	36.109517	-115.14195	829902	U OF NEVADA LAS VEGAS	724	Non-Elite	female	98	LAS VEGAS	NV	SCHOOLS OF PUBLIC HEALTH	891549900	UNITED STATES	N	5/12/21 0:00	##########	865	Non-SBIR/STTR	2021	248988	NICHD	166547	coastal
NIA	10404323	##########	PA-18-398	4R00AG061238-03	4	R00	AG	61238	3		WAGSTER, MOLLY V	8/1/21 0:00	##########	NSS	14437432	8	Unavailable	73130411	FLJ7DQKLL226	73130411	FLJ7DQKLL226	US	42.363198	-71.068772	4907701	MASSACHUSETTS GENERAL HOSP		Elite	female	98	BOSTON	MA	Independent Hospitals	21142621	UNITED STATES	N	8/1/21 0:00	##########	866	Non-SBIR/STTR	2021	249000	NIA	148214	#N/A
NIDA	9411846	3/10/17 0:00	PA-11-197	4R00DA035865-03	4	R00	DA	35865	3		BERTON, OLIVIER	5/1/17 0:00	4/30/20 0:00	NSS	10122404	9	NEUROSCIENCES	3137015	QDE5UHE5XD16	3137015	QDE5UHE5XD16	US	37.233061	-80.421005	8968001	VIRGINIA POLYTECHNIC INST AND ST U		Non-Elite	male	100	BLACKSBURG	VA	SCHOOLS OF ARTS AND SCIENCES	240616100	UNITED STATES	N	5/1/17 0:00	4/30/18 0:00	279	Non-SBIR/STTR	2017	249000	NIDA	184969	coastal
NICHD	9067025	7/16/15 0:00	PA-11-197	4R00HD075860-03	4	R00	HD	75860	3		KING, ROSALIND B	7/20/15 0:00	6/30/18 0:00	NSS	9587548	45	SOCIAL SCIENCES	46705849	MJC5FCYQTPE6	46705849	MJC5FCYQTPE6	US	33.64852	-117.82136	577504	U OF CALIFORNIA IRVINE		Non-Elite	female	98	IRVINE	CA	SCHOOLS OF ARTS AND SCIENCES	926970001	UNITED STATES	N	7/20/15 0:00	6/30/16 0:00	865	Non-SBIR/STTR	2015	249000	NICHD	161165	coastal
NCI	9753406	9/12/18 0:00	PA-16-077	4R00CA212154-03	4	R00	CA	212154	3		FINGERMAN, IAN M	9/17/18 0:00	8/31/21 0:00	NSS	11888544	45	BIOCHEMISTRY	46705849	MJC5FCYQTPE6	46705849	MJC5FCYQTPE6	US	33.64852	-117.82136	577504	U OF CALIFORNIA IRVINE		Non-Elite	male	91	IRVINE	CA	SCHOOLS OF MEDICINE	926970001	UNITED STATES	N	9/17/18 0:00	8/31/19 0:00	395	Non-SBIR/STTR	2018	249000	NCI	161165	#N/A
NCI	9892554	7/24/19 0:00	PA-16-193	4R00CA229984-02	4	R00	CA	229984	2		DASCHNER, PHILLIP J	8/1/19 0:00	7/31/22 0:00	NSS	14546459	7	Unavailable	78200995	HMSNCM57QNR5	78200995	HMSNCM57QNR5	US	47.627342	-122.331593	861001	FRED HUTCHINSON CANCER RES CTR		Elite	female	98	SEATTLE	WA	Research Institutes	981094433	UNITED STATES	N	8/1/19 0:00	7/31/20 0:00	395	Non-SBIR/STTR	2019	249000	NCI	174639	coastal
NCI	8528236	9/20/12 0:00		4R00CA160574-02	4	R00	CA	160574	2		PELROY, RICHARD	9/20/12 0:00	8/31/15 0:00	NSS	10641721	6	BIOCHEMISTRY	1912864	M1LVPE5GLSD9	1912864	M1LVPE5GLSD9	US	40.481906	-74.457066	1196203	RUTGERS THE STATE U OF NJ		Non-Elite	male	99	PISCATAWAY	NJ	SCHOOLS OF ARTS AND SCIENCES	88543925	UNITED STATES	N	9/20/12 0:00	8/31/13 0:00	393	Non-SBIR/STTR	2012	249000	NCI	227715	#N/A
NIA	10382565	##########	PA-16-193	4R00AG057808-03	4	R00	AG	57808	3		OPANASHUK, LISA A	7/1/21 0:00	##########	NSS	10674031	11	PATHOLOGY	77758407	HJMKEF7EJW69	77758407	HJMKEF7EJW69	US	41.502739	-81.607334	218601	CASE WESTERN RESERVE U	992	Non-Elite	male	99	CLEVELAND	OH	SCHOOLS OF MEDICINE	441061712	UNITED STATES	N	7/1/21 0:00	##########	866	Non-SBIR/STTR	2021	248999	NIA	154658	coastal
NIA	8602864	1/30/13 0:00	PA-09-036	4R00AG036817-03	4	R00	AG	36817	3		VELAZQUEZ, JOSE M	2/1/13 0:00	1/31/16 0:00	NSS	8481802	3	NONE	832127323	DLWBSLWAJWR1	832127323	DLWBSLWAJWR1	US	39.999598	-83.033131	6218701	OHIO STATE U		Non-Elite	female	92	COLUMBUS	OH	SCHOOLS OF MEDICINE	432101016	UNITED STATES	N	2/1/13 0:00	1/31/14 0:00	866	Non-SBIR/STTR	2013	248973	NIA	162656	#N/A
NIEHS	8607255	2/7/13 0:00	PA-11-197	4R00ES019918-02	4	R00	ES	19918	2		REINLIB, LESLIE J	4/1/13 0:00	3/31/16 0:00	NSS	10454730	3	Unavailable	832127323	DLWBSLWAJWR1	832127323	DLWBSLWAJWR1	US	39.999598	-83.033131	6218701	OHIO STATE U		Non-Elite	male	100	COLUMBUS	OH	Domestic Higher Education	432101016	UNITED STATES	N	4/1/13 0:00	3/31/14 0:00	113	Non-SBIR/STTR	2013	249000	NIEHS	162480	coastal
NINDS	9996296	8/28/19 0:00	PA-16-193	4R00NS105915-03	4	R00	NS	105915	3		BAMBRICK, LINDA LOUISE	4/1/18 0:00	5/31/22 0:00	NST-2 Study Section [NST-2]	10312673	28	Unavailable	75307785	NCSMA19DF7E6	75307785	NCSMA19DF7E6	US	34.076544	-118.380004	1225501	CEDARS SINAI MED CTR		Non-Elite	male	100	LOS ANGELES	CA	Independent Hospitals	900481804	UNITED STATES	N	9/1/19 0:00	5/31/20 0:00	853	Non-SBIR/STTR	2019	246913	NINDS	200690	coastal
NIEHS	10126076	4/29/20 0:00	PA-16-193	4R00ES027869-03	4	R00	ES	27869	3		LAWLER, CINDY P	5/1/20 0:00	4/30/23 0:00	NSS	10520287	9	ANATOMY/CELL BIOLOGY	807418939	M9ACC5DQCNL6	807418939	M9ACC5DQCNL6	US	41.619554	-83.620727	229501	U OF TOLEDO HEALTH SCI CAMPUS	525	Non-Elite	male	99	TOLEDO	OH	SCHOOLS OF MEDICINE	436142595	UNITED STATES	N	5/1/20 0:00	4/30/21 0:00	113	Non-SBIR/STTR	2020	249000	NIEHS	194373	#N/A
NIA	9812866	3/5/19 0:00	PA-16-077	4R00AG052666-03	4	R00	AG	52666	3		FRIDELL, YIH-WOEI	9/30/16 0:00	12/31/21 0:00	NSS	9211183	5	ANATOMY/CELL BIOLOGY	965717143	GTNBNWXJ12D5	965717143	DWH7MSXKA2A8; GTNBNWXJ12D5	US	36.143381	-86.803365	8721001	VANDERBILT U		Non-Elite	male	100	Nashville	TN	SCHOOLS OF MEDICINE	372032408	UNITED STATES	N	3/15/19 0:00	12/31/19 0:00	866	Non-SBIR/STTR	2019	249000	NIA	158599	#N/A
NICHD	8687806	8/22/13 0:00	PA-10-063	4R00HD067342-03	4	R00	HD	67342	3		ILEKIS, JOHN V	8/26/13 0:00	7/31/16 0:00	NSS	6160980	2	Unavailable	146515460	WLDGTNCFFJZ3	146515460	WLDGTNCFFJZ3	US	39.545077	-119.818277	829903	U OF NEVADA RENO	678	Non-Elite	female	99	RENO	NV	Domestic Higher Education	89557	UNITED STATES	N	8/26/13 0:00	7/31/14 0:00	865	Non-SBIR/STTR	2013	248981	NICHD	174597	#N/A
NIA	10542536	1/31/22	PA-18-398	4R00AG061216-03	4	R00	AG	61216	3		GUO, MAX	2/1/22	1/31/25	NSS	12588896	7	Unavailable	79715609	MVEEWMEJJB24	79715609	MVEEWMEJJB24	US	47.611667	-122.347772	10040802	ALTIUS INST FOR BIOMED SCI		Non-Elite	male	100	SEATTLE	WA	Research Institutes	981211692	UNITED STATES	N	2/1/22	1/31/23	866	Non-SBIR/STTR	2022	249000	NIA	302195	coastal
NIEHS	9022085	6/24/15 0:00	PA-11-197	4R00ES021737-02	4	R00	ES	21737	2		HEINDEL, JERROLD	7/1/15 0:00	6/30/18 0:00	NSS	11080677	1	PUBLIC HEALTH & PREV MEDICINE	41064767	DZ4YCZ3QSPR5	41064767	DZ4YCZ3QSPR5	US	39.129719	-84.520554	1523902	U OF CINCINNATI		Non-Elite	female	99	CINCINNATI	OH	SCHOOLS OF MEDICINE	452210001	UNITED STATES	N	7/1/15 0:00	6/30/16 0:00	113	Non-SBIR/STTR	2015	248761	NIEHS	171590	coastal
NHLBI	9097874	8/20/15 0:00	PA-11-197	4R00HL121177-02	4	R00	HL	121177	2		WANG, WAYNE C	8/1/15 0:00	8/31/18 0:00	NSS	10489626	7	PHARMACOLOGY	5436803	KG76WYENL5K1	5436803	KG76WYENL5K1	US	42.050479	-87.680046	6144650	NORTHWESTERN U		Elite	male	99	CHICAGO	IL	SCHOOLS OF MEDICINE	606114579	UNITED STATES	N	9/1/15 0:00	8/31/16 0:00	837	Non-SBIR/STTR	2015	249000	NHLBI	161165	coastal
NIMH	8661826	7/30/13 0:00	PA-10-063	4R00MH092715-03	4	R00	MH	92715	3		ROSSI, ANDREW	8/1/13 0:00	5/31/16 0:00	NSS	10411102	12	Unavailable	2484665	NJ1YPQXQG7U5	2484665	NJ1YPQXQG7U5	US	40.345441	-74.655866	6661401	PRINCETON U		Elite	male	99	Princeton	NJ	Domestic Higher Education	85406000	UNITED STATES	N	8/1/13 0:00	5/31/14 0:00	242	Non-SBIR/STTR	2013	248999	NIMH	184610	#N/A
NIDCR	8201706	1/12/11 0:00		4R00DE020855-02	4	R00	DE	20855	2		SCHOLNICK, STEVEN	2/1/11 0:00	1/31/14 0:00	NSS	9876662	12	ANATOMY/CELL BIOLOGY	94878337	KMH5K9V7S518	94878337	KMH5K9V7S518	US	37.767442	-122.413937	577508	U OF CALIFORNIA SAN FRANCISCO		Elite	male	100	SAN FRANCISCO	CA	SCHOOLS OF DENTISTRY/ORAL HYGN	941432510	UNITED STATES	N	2/1/11 0:00	1/31/12 0:00	121	Non-SBIR/STTR	2011	249000	NIDCR		coastal
AHRQ	9069144	8/25/15 0:00	RFA-HS-13-002	4R00HS022404-03	4	R00	HS	22404	3		WILLIS, TAMARA	9/1/15 0:00	8/31/18 0:00	NSS	10661874	52	NONE	64467962	V6S1GT51XD56	64467962	V6S1GT51XD56	US	32.770509	-117.189554	291401	U OF SAN DIEGO	466	Non-Elite	female	98	SAN DIEGO	CA	SCHOOLS OF NURSING	921102492	UNITED STATES	N	9/1/15 0:00	8/31/16 0:00	226	Non-SBIR/STTR	2015	249000	AHRQ	177452	coastal
NCI	8786623	1/27/14 0:00	PA-11-197	4R00CA166181-02	4	R00	CA	166181	2		HOWCROFT, THOMAS K	1/27/14 0:00	12/31/16 0:00	NSS	10912061	3	BIOLOGY	42250712	GM1XX56LEP58	42250712	GM1XX56LEP58	US	39.953462	-75.193983	6463801	U OF PENNSYLVANIA		Elite	male	98	PHILADELPHIA	PA	SCHOOLS OF MEDICINE	191046205	UNITED STATES	N	1/27/14 0:00	12/31/14 0:00	396	Non-SBIR/STTR	2014	224099	NCI	146677	coastal
NCI	9189160	1/26/16 0:00	PA-11-197	4R00CA178177-03	4	R00	CA	178177	3		WOODHOUSE, ELIZABETH	9/17/13 0:00	1/31/19 0:00	NSS	10305047	3	MICROBIOLOGY/IMMUN/VIROLOGY	53284659	R8JEVL4ULGB7	53284659	R8JEVL4ULGB7	US	39.948207	-75.157825	4050801	THOMAS JEFFERSON U	297	Non-Elite	female	96	PHILADELPHIA	PA	SCHOOLS OF MEDICINE	191074418	UNITED STATES	N	2/1/16 0:00	1/31/17 0:00	396	Non-SBIR/STTR	2016	249000	NCI	159616	#N/A
NIDCR	8733231	12/24/13 0:00	PAR-09-256	4R00DE022378-03	4	R00	DE	22378	3		HARRIS, EMILY L	1/1/14 0:00	12/31/16 0:00	NSS	10267169	2	Unavailable	62761671	Z1H9VJS8NG16	62761671	Z1H9VJS8NG16	US	41.664405	-91.542152	3972901	U OF IOWA	2231	Non-Elite	male	96	IOWA CITY	IA	Domestic Higher Education	522421320	UNITED STATES	N	1/1/14 0:00	12/31/14 0:00	121	Non-SBIR/STTR	2014	248999	NIDCR	164900	coastal
NIGMS	8018755	2/26/10 0:00	PA-07-297	4R00GM087533-02	4	R00	GM	87533	2		HAGAN, ANN A	3/9/09 0:00	1/31/13 0:00	NSS	8408666	3	CHEMISTRY	969663814	NNFQH1JAPEP3	969663814	NNFQH1JAPEP3	US	29.643443	-82.349637	513806	U OF FLORIDA		Non-Elite	female	99	GAINESVILLE	FL	SCHOOLS OF ARTS AND SCIENCES	326115500	UNITED STATES	N	2/26/10 0:00	1/31/11 0:00	859	Non-SBIR/STTR	2010	249000	NIGMS		coastal
NIAID	8133574	8/31/10 0:00	PA-07-297	4R00AI077798-02	4	R00	AI	77798	2		PROGRAIS, LAWRENCE J	9/15/09 0:00	8/31/12 0:00	NSS	8464732	19	BIOLOGY	41367053	EGLKRQ5JBCZ7	41367053	EGLKRQ5JBCZ7	US	33.584696	-101.872767	8285901	TEXAS TECH U	1082	Non-Elite	male	99	LUBBOCK	TX	SCHOOLS OF ARTS AND SCIENCES	794091035	UNITED STATES	N	9/1/10 0:00	8/31/11 0:00	855	Non-SBIR/STTR	2010	249000	NIAID		coastal
NIDDK	8049894	5/3/10 0:00	PA-06-133	4R00DK078917-03	4	R00	DK	78917	3		KETCHUM, CHRISTIAN J	4/1/08 0:00	3/31/13 0:00	NSS	8082444	18	INTERNAL MEDICINE/MEDICINE	4514360	MKAGLD59JRL1	4514360	MKAGLD59JRL1	US	40.440909	-79.959125	2059802	U OF PITTSBURGH AT PITTSBURGH		Elite	male	99	PITTSBURGH	PA	SCHOOLS OF MEDICINE	152133320	UNITED STATES	N	5/3/10 0:00	3/31/11 0:00	847	Non-SBIR/STTR	2010	248999	NIDDK		coastal
NIGMS	8181834	12/13/10 0:00	PA-10-063	4R00GM086517-03	4	R00	GM	86517	3		MAAS, STEFAN	12/1/08 0:00	12/31/13 0:00	NSS	7983054	12	BIOCHEMISTRY	73133571	GNJ7BBP73WE9	73133571	GNJ7BBP73WE9	US	42.275494	-83.743038	1506502	U OF MICHIGAN AT ANN ARBOR		Elite	female	98	ANN ARBOR	MI	SCHOOLS OF ARTS AND SCIENCES	481091276	UNITED STATES	N	1/1/11 0:00	12/31/11 0:00	859	Non-SBIR/STTR	2011	239698	NIGMS		coastal
NIDCR	9749390	9/14/18 0:00	PA-11-197	4R00DE024571-03	4	R00	DE	24571	3		WANG, LU	9/14/18 0:00	8/31/21 0:00	NSS	11494812	98	NONE	948108063	KWTAB1GYM4L9	948108063	KWTAB1GYM4L9	US	18.410481	-66.065613	578705	U OF PUERTO RICO MED SCI		Non-Elite	female	98	SAN JUAN	PR	SCHOOLS OF DENTISTRY/ORAL HYGN	9365067	UNITED STATES	N	9/14/18 0:00	8/31/19 0:00	121	Non-SBIR/STTR	2018	248996	NIDCR	165997	coastal
NIMH	10614103	8/16/22	PA-19-130	4R00MH124920-03	4	R00	MH	124920	3		DRISCOLL, JAMIE	8/16/22	6/30/25	ZMH1-SRC(99)	15283871	7	NEUROSCIENCES	39318308	C1F5LNUF7W86	39318308	C1F5LNUF7W86	US	42.3498	-71.06149	8422704	TUFTS U BOSTON	761	Non-Elite	male	98	BOSTON	MA	SCHOOLS OF MEDICINE	21111901	UNITED STATES	N	8/16/22	6/30/23	242	Non-SBIR/STTR	2022	249000	NIMH	184899	coastal
NEI	8513441	8/6/12 0:00	PA-10-163	4R00EY020865-02	4	R00	EY	20865	2		AGARWAL, NEERAJ	8/1/11 0:00	7/31/15 0:00	NSS	10204572	3	BIOLOGY	98377336	DLUTVJJ15U66	98377336	DLUTVJJ15U66	US	36.109517	-115.141947	829902	U OF NEVADA LAS VEGAS		Non-Elite	female	97	LAS VEGAS	NV	SCHOOLS OF ARTS AND SCIENCES	891549900	UNITED STATES	N	9/1/12 0:00	7/31/13 0:00	867	Non-SBIR/STTR	2012	249000	NEI	172917	coastal
NINDS	8089915	8/9/10 0:00	PA-10-063	4R00NS062128-03	4	R00	NS	62128	3		KLEITMAN, NAOMI	5/1/08 0:00	5/31/13 0:00	NSS	9094159	3	NEUROLOGY	43207562	FL6GV84CKN57	43207562	FL6GV84CKN57	US	41.310925	-72.926428	9420201	YALE U		Elite	male	99	NEW HAVEN	CT	SCHOOLS OF MEDICINE	65208327	UNITED STATES	N	8/15/10 0:00	5/31/11 0:00	853	Non-SBIR/STTR	2010	249000	NINDS		coastal
NIEHS	9732777	8/14/18 0:00	PA-15-083	4R00ES026191-02	4	R00	ES	26191	2		HEACOCK, MICHELLE	8/15/18 0:00	7/31/21 0:00	NSS	12552053	3	BIOCHEMISTRY	969663814	NNFQH1JAPEP3	969663814	NNFQH1JAPEP3	US	29.643443	-82.349637	513806	U OF FLORIDA		Non-Elite	female	96	GAINESVILLE	FL	SCHOOLS OF MEDICINE	326115500	UNITED STATES	N	8/15/18 0:00	7/31/19 0:00	113	Non-SBIR/STTR	2018	249000	NIEHS	169091	coastal
NIAID	10046756	12/30/19 0:00	PA-16-193	4R00AI128029-03	4	R00	AI	128029	3		GU, XIN-XING	1/1/20 0:00	12/31/21 0:00	NSS	9018789	18	BIOLOGY	4514360	MKAGLD59JRL1	4514360	MKAGLD59JRL1	US	40.440909	-79.959125	2059802	U OF PITTSBURGH AT PITTSBURGH		Elite	female	71	PITTSBURGH	PA	SCHOOLS OF ARTS AND SCIENCES	152133320	UNITED STATES	N	1/1/20 0:00	12/31/20 0:00	855	Non-SBIR/STTR	2020	249000	NIAID	206653	#N/A
NIDDK	10201897	7/14/20 0:00	PA-16-193	4R00DK115778-03	4	R00	DK	115778	3		BURGESS-BEUSSE, BONNIE L	7/16/20 0:00	4/30/23 0:00	NSS	12015184	13	INTERNAL MEDICINE/MEDICINE	78861598	C8H9CNG1VBD9	78861598	C8H9CNG1VBD9	US	40.790284	-73.946781	3839801	ICAHN SCH OF MED AT MOUNT SINAI		Non-Elite	unknown		NEW YORK	NY	SCHOOLS OF MEDICINE	100296574	UNITED STATES	N	7/16/20 0:00	4/30/21 0:00	847	Non-SBIR/STTR	2020	249000	NIDDK	146903	coastal
NCI	9062577	5/15/15 0:00	PA-11-197	4R00CA166507-03	4	R00	CA	166507	3		SATHYAMOORTHY, NEERAJA	6/1/15 0:00	5/31/18 0:00	NSS	10275601	8	BIOLOGY	808008122	CGCDJ24JJLZ1	808008122	CGCDJ24JJLZ1	US	42.313703	-71.062976	850902	U OF MASSACHUSETTS BOSTON	475	Non-Elite	unknown		BOSTON	MA	SCHOOLS OF ARTS AND SCIENCES	21253300	UNITED STATES	N	6/1/15 0:00	5/31/16 0:00	396	Non-SBIR/STTR	2015	246228	NCI	161593	coastal
NIA	8458784	4/27/12 0:00	PA-11-197	4R00AG033658-02	4	R00	AG	33658	2		REFOLO, LORENZO	5/1/12 0:00	4/30/15 0:00	NSS	9516902	6	ANATOMY/CELL BIOLOGY	1912864	M1LVPE5GLSD9	1912864	M1LVPE5GLSD9	US	40.481906	-74.457066	1196203	RUTGERS THE STATE U OF NJ		Non-Elite	female	65	PISCATAWAY	NJ	SCHOOLS OF ARTS AND SCIENCES	88543925	UNITED STATES	N	5/1/12 0:00	4/30/13 0:00	866	Non-SBIR/STTR	2012	249000	NIA	231332	coastal
NIA	10664201	8/11/22	PA-19-130	4R00AG068359-03	4	R00	AG	68359	3		YANG, AUSTIN JYAN-YU	9/1/22	8/31/25	ZAG1-SRC(99)	10129954	11	PATHOLOGY	77758407	HJMKEF7EJW69	77758407	HJMKEF7EJW69	US	41.502739	-81.607334	218601	CASE WESTERN RESERVE U		Non-Elite	male	99	CLEVELAND	OH	SCHOOLS OF MEDICINE	441061712	UNITED STATES	N	9/1/22	8/31/23	866	Non-SBIR/STTR	2022	248999	NIA	154658	#N/A
NIDA	9601939	3/13/18 0:00	PA-15-083	4R00DA042111-03	4	R00	DA	42111	3		SORENSEN, ROGER	3/15/18 0:00	2/28/21 0:00	NSS	10577308	5	PHARMACOLOGY	965717143	GTNBNWXJ12D5	965717143	DWH7MSXKA2A8; GTNBNWXJ12D5	US	36.143381	-86.803365	8721001	VANDERBILT U		Non-Elite	female	96	Nashville	TN	SCHOOLS OF MEDICINE	372032408	UNITED STATES	N	3/15/18 0:00	2/28/19 0:00	279	Non-SBIR/STTR	2018	249000	NIDA	191274	#N/A
NIMH	9983864	8/3/19 0:00	PA-16-193	4R00MH113821-03	4	R00	MH	113821	3		PRABHAKAR, JANANI	7/1/19 0:00	4/30/22 0:00	NSS	12659393	33	PSYCHOLOGY	92530369	RN64EPNH8JC6	92530369	RN64EPNH8JC6	US	34.070199	-118.45102	577505	U OF CALIFORNIA LOS ANGELES		Elite	female	99	LOS ANGELES	CA	SCHOOLS OF ARTS AND SCIENCES	900952000	UNITED STATES	N	7/1/19 0:00	4/30/20 0:00	242	Non-SBIR/STTR	2019	245223	NIMH	157194	#N/A
NIA	9995783	9/7/19 0:00	PA-16-193	4R00AG058800-02	4	R00	AG	58800	2		FULDNER, REBECCA A	9/15/19 0:00	5/31/22 0:00	NSS	9714653	5	BIOCHEMISTRY	555917996	KABJZBBJ4B54	555917996	KABJZBBJ4B54	US	44.975143	-93.227003	1450402	U OF MINNESOTA		Non-Elite	female	94	MINNEAPOLIS	MN	SCHOOLS OF MEDICINE	554552070	UNITED STATES	N	9/15/19 0:00	5/31/20 0:00	866	Non-SBIR/STTR	2019	249000	NIA	168765	coastal
NLM	8588740	5/14/13 0:00	PA-10-063	4R00LM011014-03	4	R00	LM	11014	3		SIM, HUA-CHUAN	4/1/11 0:00	3/31/16 0:00	ZLM1-ZH-C(J2)	9345050	7	Unavailable	76593722	Z1L9F1MM1RY3	76593722	Z1L9F1MM1RY3	US	42.337481	-71.104964	1504801	BOSTON CHILDRENS HOSP		Elite	male	80	BOSTON	MA	Independent Hospitals	21155724	UNITED STATES	N	4/1/13 0:00	3/31/14 0:00	879	Non-SBIR/STTR	2013	187020	NLM	92520	#N/A
NIAAA	10395716	5/5/21 0:00	PA-18-398	4R00AA026642-03	4	R00	AA	26642	3		CUI, CHANGHAI	5/5/21 0:00	##########	NSS	7735434	6	BIOLOGY	71576482	SKH5GMBR9GL3	71576482	SKH5GMBR9GL3	US	36.074178	-79.775965	578212	NORTH CAROLINA AGRI & TECH ST U	404	Non-Elite	male	98	GREENSBORO	NC	SCHOOLS OF ARTS AND SCIENCES	274110001	UNITED STATES	N	5/5/21 0:00	##########	273	Non-SBIR/STTR	2021	248998	NIAAA	188193	#N/A
NIEHS	8350767	2/10/12 0:00	PA-11-197	4R00ES019879-02	4	R00	ES	19879	2		HOLLANDER, JONATHAN	2/10/12 0:00	1/31/15 0:00	NSS	6997573	4	OTHER HEALTH PROFESSIONS	72051394	YRXVL4JYCEF5	72051394	YRXVL4JYCEF5	US	40.41872	-86.910361	1481402	PURDUE U	1811	Non-Elite	male	99	WEST LAFAYETTE	IN	SCHOOLS OF PUBLIC HEALTH	47906	UNITED STATES	N	2/10/12 0:00	1/31/13 0:00	113	Non-SBIR/STTR	2012	249000	NIEHS	161688	#N/A
NIGMS	9849410	4/1/19 0:00	PA-16-077	4R00GM121815-03	4	R00	GM	121815	3		PHILLIPS, ANDRE W	6/1/17 0:00	2/28/22 0:00	NSS	9800963	12	NEUROLOGY	94878337	KMH5K9V7S518	94878337	KMH5K9V7S518	US	37.767442	-122.413937	577508	U OF CALIFORNIA SAN FRANCISCO		Elite	male	87	SAN FRANCISCO	CA	SCHOOLS OF MEDICINE	941432510	UNITED STATES	N	4/1/19 0:00	2/29/20 0:00	859	Non-SBIR/STTR	2019	249000	NIGMS	173022	#N/A
NICHD	10240919	9/8/20 0:00	PA-18-398	4R00HD094906-03	4	R00	HD	94906	3		MUKHOPADHYAY, MAHUA	9/8/20 0:00	8/31/23 0:00	NSS	14546587	11	BIOCHEMISTRY	77758407	HJMKEF7EJW69	77758407	HJMKEF7EJW69	US	41.502739	-81.607334	218601	CASE WESTERN RESERVE U		Non-Elite	male	100	CLEVELAND	OH	SCHOOLS OF MEDICINE	441061712	UNITED STATES	N	9/8/20 0:00	8/31/21 0:00	865	Non-SBIR/STTR	2020	249000	NICHD	184590	#N/A
NIA	8135856	9/14/10 0:00		4R00AG029761-02	4	R00	AG	29761	2		VELAZQUEZ, JOSE M	9/15/10 0:00	8/31/13 0:00	NSS	8630710	5	ANATOMY/CELL BIOLOGY	790934285	NPU8ULVAAS23	790934285	NPU8ULVAAS23	US	38.992333	-76.952986	820102	U OF MARYLAND COLL PARK	1471	Non-Elite	male	71	COLLEGE PARK	MD	EARTH SCIENCES/RESOURCES	207420001	UNITED STATES	N	9/15/10 0:00	8/31/11 0:00	866	Non-SBIR/STTR	2010	249000	NIA		coastal
NIDCD	9929227	8/1/19 0:00	PA-16-193	4R00DC016046-03	4	R00	DC	16046	3		RIVERA-RENTAS, ALBERTO L	9/1/17 0:00	7/31/22 0:00	ZDC1-SRB-R(34)	10086994	5	BIOLOGY	790934285	NPU8ULVAAS23	790934285	NPU8ULVAAS23	US	38.992333	-76.952986	820102	U OF MARYLAND COLL PARK		Non-Elite	female	98	COLLEGE PARK	MD	EARTH SCIENCES/RESOURCES	207420001	UNITED STATES	N	8/1/19 0:00	7/31/20 0:00	173	Non-SBIR/STTR	2019	249000	NIDCD	227334	coastal
NIMH	9748081	9/7/18 0:00	PA-15-083	4R00MH106744-03	4	R00	MH	106744	3		ROSSI, ANDREW	9/7/18 0:00	7/31/21 0:00	NSS	10891566	10	PHARMACOLOGY	78795851	QHHJD3X516J9	78795851	QHHJD3X516J9	US	40.738771	-74.190235	10034169	RBHS NEW JERSEY MED SCH		Non-Elite	female	97	NEWARK	NJ	SCHOOLS OF MEDICINE	71032757	UNITED STATES	N	9/7/18 0:00	7/31/19 0:00	242	Non-SBIR/STTR	2018	249000	NIMH	162821	#N/A
NEI	8035732	4/12/10 0:00	PA-07-297	4R00EY018407-03	4	R00	EY	18407	3		LIBERMAN, ELLEN S	4/1/10 0:00	3/31/13 0:00	NSS	2218161	3	NEUROSCIENCES	43207562	FL6GV84CKN57	43207562	FL6GV84CKN57	US	41.310925	-72.926428	9420201	YALE U		Elite	female	98	NEW HAVEN	CT	SCHOOLS OF MEDICINE	65208327	UNITED STATES	N	4/1/10 0:00	3/31/11 0:00	867	Non-SBIR/STTR	2010	248998	NEI		#N/A
NICHD	8913352	9/3/14 0:00	PA-11-197	4R00HD069410-03	4	R00	HD	69410	3		MOSS, STUART B	9/1/12 0:00	8/31/17 0:00	NSS	7245267	18	BIOLOGY	4514360	MKAGLD59JRL1	4514360	MKAGLD59JRL1	US	40.440909	-79.959125	2059802	U OF PITTSBURGH AT PITTSBURGH		Elite	female	98	PITTSBURGH	PA	SCHOOLS OF ARTS AND SCIENCES	152133320	UNITED STATES	N	9/3/14 0:00	8/31/15 0:00	865	Non-SBIR/STTR	2014	248999	NICHD	199400	coastal
NIGMS	7635369	6/27/08 0:00		4R00GM082983-02	4	R00	GM	82983	2		FABIAN, MILES	12/1/07 0:00	6/30/11 0:00	NSS	9437283	9	CHEMISTRY	6046700	YH86RTW2YVJ4	6046700	YH86RTW2YVJ4	US	39.172055	-86.523157	577805	TRUSTEES OF INDIANA U	1619	Non-Elite	female	96	BLOOMINGTON	IN	SCHOOLS OF ARTS AND SCIENCES	474013654	UNITED STATES	N	7/1/08 0:00	6/30/09 0:00	859	Non-SBIR/STTR	2008	248957	NIGMS		coastal
NCI	9406517	1/26/17 0:00	PA-14-042	4R00CA191021-03	4	R00	CA	191021	3		HOWCROFT, THOMAS K	9/1/15 0:00	1/31/20 0:00	NSS	12106227	12	BIOLOGY	41968306	NX9PXMKW5KW8	41968306	NX9PXMKW5KW8	US	40.729659	-73.997018	5998301	NEW YORK U		Elite	male	99	NEW YORK	NY	SCHOOLS OF ARTS AND SCIENCES	100122300	UNITED STATES	N	2/1/17 0:00	1/31/18 0:00	396	Non-SBIR/STTR	2017	249000	NCI	194006	coastal
NIDDK	8709738	9/15/13 0:00	PA-09-036	4R00DK088360-03	4	R00	DK	88360	3		HORLICK, MARY	9/16/13 0:00	8/31/16 0:00	NSS	9790393	7	PSYCHIATRY	1910777	FTMTDMBR29C7	1910777	FTMTDMBR29C7	US	39.325256	-76.605131	4134401	JOHNS HOPKINS U		Elite	female	98	BALTIMORE	MD	SCHOOLS OF MEDICINE	212182680	UNITED STATES	N	9/16/13 0:00	8/31/14 0:00	847	Non-SBIR/STTR	2013	249000	NIDDK	169852	coastal
NIBIB	8459212	5/30/12 0:00		4R00EB011889-03	4	R00	EB	11889	3		CONROY, RICHARD	6/10/10 0:00	5/31/15 0:00	NSS	8873986	8	Unavailable	73130411	FLJ7DQKLL226	73130411	FLJ7DQKLL226	US	42.363198	-71.068772	4907701	MASSACHUSETTS GENERAL HOSP		Elite	male	98	BOSTON	MA	Independent Hospitals	21142621	UNITED STATES	N	6/1/12 0:00	5/31/13 0:00	286	Non-SBIR/STTR	2012	249000	NIBIB	159032	coastal
NIMHD	7639945	11/26/08 0:00	PA-07-297	4R00MD002271-03	4	R00	MD	2271	3		HUNTER, DELORIS	12/1/06 0:00	11/30/11 0:00	NSS	8544750	7	Unavailable	10095032	YM5EKEVEGB75	10095032	YM5EKEVEGB75	US	39.303676	-76.619888	1300201	FRIENDS RES INST INC		Non-Elite	male	99	BALTIMORE	MD	Research Institutes	212015633	UNITED STATES	N	12/1/08 0:00	11/30/09 0:00	307	Non-SBIR/STTR	2009	247979	NIMHD		coastal
NINDS	9341653	9/26/16 0:00	PA-14-042	4R00NS089858-03	4	R00	NS	89858	3		WHITTEMORE, VICKY R	9/30/16 0:00	8/31/19 0:00	NSS	11230297	7	NEUROLOGY	5436803	KG76WYENL5K1	5436803	KG76WYENL5K1	US	42.050479	-87.680046	6144650	NORTHWESTERN U		Elite	female	99	CHICAGO	IL	SCHOOLS OF MEDICINE	606114579	UNITED STATES	N	9/30/16 0:00	8/31/17 0:00	853	Non-SBIR/STTR	2016	248602	NINDS	158851	#N/A
NIGMS	9460085	4/10/17 0:00	PA-11-197	4R00GM108865-03	4	R00	GM	108865	3		JANES, DANIEL E	5/1/14 0:00	2/29/20 0:00	NSS	11135146	18	BIOLOGY	4514360	MKAGLD59JRL1	4514360	MKAGLD59JRL1	US	40.440909	-79.959125	2059802	U OF PITTSBURGH AT PITTSBURGH		Elite	female	98	PITTSBURGH	PA	SCHOOLS OF MEDICINE	152133320	UNITED STATES	N	4/15/17 0:00	2/28/18 0:00	859	Non-SBIR/STTR	2017	249000	NIGMS	160645	coastal
NIDDK	8240205	8/11/11 0:00		4R00DK083333-03	4	R00	DK	83333	3		LINDER, BARBARA	8/11/11 0:00	5/31/14 0:00	NSS	8965686	7	NUTRITION	63690705	YND4PLMC9AN7	63690705	YND4PLMC9AN7	US	33.50591	-86.799772	1288803	U OF ALABAMA AT BIRMINGHAM		Non-Elite	female	98	BIRMINGHAM	AL	SCH ALLIED HEALTH PROFESSIONS	352940001	UNITED STATES	N	8/11/11 0:00	5/31/12 0:00	847	Non-SBIR/STTR	2011	249000	NIDDK		#N/A
NHLBI	9291573	8/28/16 0:00	PA-14-042	4R00HL123471-02	4	R00	HL	123471	2		GALIS, ZORINA S	7/3/15 0:00	8/31/19 0:00	NSS	8175676	2	PHYSIOLOGY	168559177	G15AG3BLLMH4	168559177	G15AG3BLLMH4	US	41.265996	-96.010026	578104	U OF NEBRASKA MED CTR	476	Non-Elite	male	99	OMAHA	NE	SCHOOLS OF MEDICINE	681987835	UNITED STATES	N	9/1/16 0:00	8/31/17 0:00	837	Non-SBIR/STTR	2016	266999	NHLBI	183448	coastal
NCCIH	10216448	8/19/20 0:00	PA-18-591	3R00AT009466-02S1	3	R00	AT	9466	2	S	TUTTLE, ALEXANDER H	12/23/19 0:00	11/30/22 0:00	NSS	11251466	52	ANESTHESIOLOGY	804355790	UYTTZT6G9DT1	804355790	UYTTZT6G9DT1	US	32.876991	-117.24087	577507	U OF CALIFORNIA SAN DIEGO		Elite	female	98	LA JOLLA	CA	SCHOOLS OF MEDICINE	920930621	UNITED STATES	N	8/1/20 0:00	11/30/20 0:00	213	Non-SBIR/STTR	2020	60704	NCCIH	38542	coastal
NHLBI	8639634	4/26/13 0:00	PA-10-063	4R00HL105467-03	4	R00	HL	105467	3		REID, DIANE M	8/1/11 0:00	3/31/16 0:00	NSS	8956530	2	Unavailable	62761671	Z1H9VJS8NG16	62761671	Z1H9VJS8NG16	US	41.664405	-91.542152	3972901	U OF IOWA		Non-Elite	male	99	IOWA CITY	IA	Domestic Higher Education	522421320	UNITED STATES	N	4/26/13 0:00	3/31/14 0:00	837	Non-SBIR/STTR	2013	237049	NHLBI	156986	coastal
NIEHS	9933124	9/11/19 0:00	PA-16-193	4R00ES027023-03	4	R00	ES	27023	3		BOYLES, ABEE	9/15/19 0:00	6/30/22 0:00	NSS	10253344	13	PUBLIC HEALTH & PREV MEDICINE	621889815	QHF5ZZ114M72	621889815	QHF5ZZ114M72	US	40.8415	-73.9414	1833205	COLUMBIA U HEALTH SCI		Elite	male	59	NEW YORK	NY	SCHOOLS OF PUBLIC HEALTH	100323725	UNITED STATES	N	9/15/19 0:00	6/30/20 0:00	113	Non-SBIR/STTR	2019	248998	NIEHS	160672	coastal
NHGRI	9071644	7/20/15 0:00	PA-11-197	4R00HG007229-03	4	R00	HG	7229	3		RAMOS, ERIN	7/1/13 0:00	6/30/18 0:00	Genome Research Study Section[GNOM-G]	8549153	7	Unavailable	30811269	QN6MS4VN7BD1	30811269	QN6MS4VN7BD1	US	42.336107	-71.107481	1080401	BRIGHAM AND WOMENS HOSP		Elite	male	99	BOSTON	MA	Independent Hospitals	21156110	UNITED STATES	N	7/1/15 0:00	6/30/16 0:00	172	Non-SBIR/STTR	2015	248999	NHGRI	140380	coastal
NICHD	8145369	9/27/10 0:00	PA-07-297	4R00HD057553-03	4	R00	HD	57553	3		NEWCOMER, SUSAN	9/15/08 0:00	8/31/13 0:00	NSS	6703381	7	MISCELLANEOUS	605799469	HD1WMN6945W6	605799469	HD1WMN6945W6	US	47.660307	-122.315168	9087701	U OF WASHINGTON		Elite	female	98	SEATTLE	WA	SCHOOLS OF ARTS AND SCIENCES	981959472	UNITED STATES	N	9/1/10 0:00	8/31/11 0:00	865	Non-SBIR/STTR	2010	249000	NICHD		coastal
NICHD	9894945	5/21/19 0:00	PA-16-193	4R00HD091375-03	4	R00	HD	91375	3		CRUZ, THERESA	9/1/19 0:00	8/31/22 0:00	NSS	11298443	4	OTHER HEALTH PROFESSIONS	608195277	D3LHU66KBLD5	608195277	D3LHU66KBLD5	US	35.9316	-79.057377	578206	U OF NORTH CAROLINA CHAPEL HILL		Elite	female	98	CHAPEL HILL	NC	SCHOOLS OF MEDICINE	275995023	UNITED STATES	N	9/1/19 0:00	8/31/20 0:00	865	Non-SBIR/STTR	2019	248579	NICHD	209890	#N/A
NCI	10447981	##########	PA-19-130	4R00CA245122-03	4	R00	CA	245122	3		XU, WANPING	9/1/21 0:00	##########	Transition to Independence Study Section (I)[NCI-I]	14585964	12	BIOCHEMISTRY	121911077	M5SZJ6VHUHN8	121911077	M5SZJ6VHUHN8	US	40.669895	-73.974354	5998304	NEW YORK U SCH OF MED		Elite	male	69	NEW YORK	NY	SCHOOLS OF MEDICINE	10016	UNITED STATES	N	9/1/21 0:00	##########	398	Non-SBIR/STTR	2021	249000	NCI	146903	coastal
NIA	9563524	9/16/17 0:00	PA-15-083	4R00AG051711-03	4	R00	AG	51711	3		WISE, BRADLEY C	9/30/17 0:00	4/30/20 0:00	NSS	9548641	13	NEUROSCIENCES	78861598	C8H9CNG1VBD9	78861598	C8H9CNG1VBD9	US	40.790284	-73.946781	3839801	ICAHN SCH OF MED AT MOUNT SINAI		Non-Elite	male	99	NEW YORK	NY	SCHOOLS OF MEDICINE	100296574	UNITED STATES	N	9/30/17 0:00	4/30/18 0:00	866	Non-SBIR/STTR	2017	248926	NIA	161210	#N/A
NHLBI	10154045	6/22/20 0:00	PA-18-398	4R00HL141143-03	4	R00	HL	141143	3		LIDMAN, KARIN FREDRIKSSON	7/1/20 0:00	6/30/23 0:00	NSS	11947206	1	PHARMACOLOGY	53785812	XNY5ULPU8EN6	53785812	XNY5ULPU8EN6	US	29.935429	-90.12279	8424601	TULANE U OF LOUISIANA	1133	Non-Elite	male	99	NEW ORLEANS	LA	SCHOOLS OF MEDICINE	701185665	UNITED STATES	N	7/1/20 0:00	6/30/21 0:00	837	Non-SBIR/STTR	2020	248819	NHLBI	178065	coastal
NIDA	10533991	2/11/22	PA-19-130	4R00DA049862-03	4	R00	DA	49862	3		LIN, YU	4/1/20	2/28/25	ZDA1-SXM-M(02)S	11389070	1	RADIATION-DIAGNOSTIC/ONCOLOGY	68552207	L6NFUM28LQM5	68552207	L6NFUM28LQM5	US	38.664368	-90.323797	9083901	WASHINGTON U		Non-Elite	male	99	SAINT LOUIS	MO	SCHOOLS OF MEDICINE	631304862	UNITED STATES	N	3/1/22	2/28/23	279	Non-SBIR/STTR	2022	249000	NIDA	158095	#N/A
NIEHS	8119194	9/3/10 0:00	PA-07-297	4R00ES017477-03	4	R00	ES	17477	3		KIRSHNER, ANNETTE G	9/3/10 0:00	5/31/13 0:00	NSS	9144539	5	PUBLIC HEALTH & PREV MEDICINE	66469933	S352L5PJLMP8	66469933	S352L5PJLMP8	US	33.791247	-84.3249	2384501	EMORY U		Non-Elite	male	99	ATLANTA	GA	SCHOOLS OF PUBLIC HEALTH	303221007	UNITED STATES	N	9/3/10 0:00	5/31/11 0:00	113	Non-SBIR/STTR	2010	247546	NIEHS		#N/A
NCI	8702320	7/26/13 0:00	PA-10-063	4R00CA155045-04	4	R00	CA	155045	4		WONG, ROSEMARY S	8/1/13 0:00	7/31/16 0:00	NSS	10294019	8	Unavailable	808008122	CGCDJ24JJLZ1	808008122	CGCDJ24JJLZ1	US	42.313703	-71.062976	850902	U OF MASSACHUSETTS BOSTON		Non-Elite	male	99	BOSTON	MA	Domestic Higher Education	21253300	UNITED STATES	N	8/1/13 0:00	7/31/14 0:00	395	Non-SBIR/STTR	2013	233990	NCI	153436	coastal
NCI	9743925	7/24/18 0:00	PA-15-083	4R00CA204522-03	4	R00	CA	204522	3		STRASBURGER, JENNIFER	8/1/16 0:00	7/31/21 0:00	NSS	11278109	10	BIOLOGY	170230239	V6AFQPN18437	170230239	V6AFQPN18437	US	30.291188	-97.737568	578403	U OF TEXAS AT AUSTIN		Non-Elite	male	95	AUSTIN	TX	SCHOOLS OF ARTS AND SCIENCES	787121139	UNITED STATES	N	8/1/18 0:00	7/31/19 0:00	395	Non-SBIR/STTR	2018	248999	NCI	159105	coastal
NIAAA	10497920	1/28/22	PA-19-130	4R00AA027774-03	4	R00	AA	27774	3		CUI, CHANGHAI	1/28/21	11/30/24	NSS	10798802	6	PHYSIOLOGY	937727907	SN7KD2UK7GC5	937727907	SN7KD2UK7GC5	US	36.059402	-80.321981	9021205	WAKE FOREST U HEALTH SCI		Non-Elite	male	99	WINSTON-SALEM	NC	SCHOOLS OF MEDICINE	271570001	UNITED STATES	N	1/28/21	11/30/22	273	Non-SBIR/STTR	2022	249000	NIAAA	177145	#N/A
NIAMS	8044356	7/23/10 0:00	PA-07-297	4R00AR056899-02	4	R00	AR	56899	2		BAKER, CARL	8/1/10 0:00	6/30/13 0:00	NSS	9358950	2	ANATOMY/CELL BIOLOGY	603847393	MQE2JHHJW9Q8	603847393	MQE2JHHJW9Q8	US	42.2802	-71.758245	850903	U OF MASSACHUSETTS MED SCH WORCESTER		Non-Elite	male	100	WORCESTER	MA	SCHOOLS OF MEDICINE	16550002	UNITED STATES	N	8/1/10 0:00	6/30/11 0:00	846	Non-SBIR/STTR	2010	248811	NIAMS		#N/A
NICHD	10438096	##########	PA-18-398	4R00HD097298-03	4	R00	HD	97298	3		TOYAMA, REIKO	##########	##########	NSS	10188397	5	GENETICS	555917996	KABJZBBJ4B54	555917996	KABJZBBJ4B54	US	44.975143	-93.227003	1450402	U OF MINNESOTA		Non-Elite	female	98	MINNEAPOLIS	MN	SCHOOLS OF MEDICINE	554552070	UNITED STATES	N	7/20/21 0:00	##########	865	Non-SBIR/STTR	2021	249000	NICHD	200752	coastal
NIGMS	10382634	5/5/21 0:00	PA-16-193	4R00GM128180-03	4	R00	GM	128180	3		BENDER, MICHAEL T	9/1/18 0:00	##########	NSS	10561866	12	BIOCHEMISTRY	73133571	GNJ7BBP73WE9	73133571	GNJ7BBP73WE9	US	42.275494	-83.743038	1506502	U OF MICHIGAN AT ANN ARBOR		Elite	male	95	ANN ARBOR	MI	SCHOOLS OF ARTS AND SCIENCES	481091276	UNITED STATES	N	5/5/21 0:00	##########	859	Non-SBIR/STTR	2021	49220	NIGMS	31551	coastal
NIDDK	8413087	3/19/12 0:00		4R00DK084259-03	4	R00	DK	84259	3		WRIGHT, DANIEL G	4/15/10 0:00	3/31/15 0:00	NSS	9640952	1	INTERNAL MEDICINE/MEDICINE	68552207	L6NFUM28LQM5	68552207	L6NFUM28LQM5	US	38.664368	-90.323797	9083901	WASHINGTON U		Non-Elite	male	100	SAINT LOUIS	MO	SCHOOLS OF MEDICINE	631304862	UNITED STATES	N	4/1/12 0:00	3/31/13 0:00	847	Non-SBIR/STTR	2012	249000	NIDDK	163816	#N/A
NEI	10527601	1/28/22	PA-18-398	4R00EY029011-03	4	R00	EY	29011	3		GREENWELL, THOMAS	1/1/22	12/31/24	NSS	12535657	7	BIOCHEMISTRY	1910777	FTMTDMBR29C7	1910777	FTMTDMBR29C7	US	39.325256	-76.605131	4134401	JOHNS HOPKINS U		Elite	male	100	BALTIMORE	MD	SCHOOLS OF MEDICINE	212182680	UNITED STATES	N	1/1/22	12/31/22	867	Non-SBIR/STTR	2022	249000	NEI	152061	#N/A
NIA	9780833	9/21/18 0:00	PA-14-042	4R00AG049958-03	4	R00	AG	49958	3		WILLIAMS, JOHN	9/30/18 0:00	5/31/21 0:00	NSS	7722509	18	SURGERY	9214214	HJD6G4D6TJY5	9214214	HJD6G4D6TJY5	US	37.426852	-122.17047	8046501	STANFORD U		Elite	male	98	STANFORD	CA	SCHOOLS OF MEDICINE	943052004	UNITED STATES	N	9/30/18 0:00	5/31/19 0:00	866	Non-SBIR/STTR	2018	249000	NIA	157249	coastal
NCI	7937539	9/24/09 0:00	PA-06-133	3R00CA129640-03S1	3	R00	CA	129640	3	S	SPALHOLZ, BARBARA A	9/30/09 0:00	9/29/10 0:00	ZCA1-RTRB-A(M1)	8781273	9	UROLOGY	51113330	FXKMA43NTV21	51113330	FXKMA43NTV21	US	29.70926	-95.400851	481201	BAYLOR COLL OF MED		Non-Elite	male	98	HOUSTON	TX	SCHOOLS OF MEDICINE	770303411	UNITED STATES	N	9/30/09 0:00	9/29/10 0:00	701	Non-SBIR/STTR	2009	100000	NCI		#N/A
NIBIB	10331914	##########	PA-18-398	4R00EB028311-02	4	R00	EB	28311	2		ATANASIJEVIC, TATJANA	7/1/19 0:00	##########	NSS	11827707	5	ENGINEERING (ALL TYPES)	97394084	EMW9FC8J3HN4	97394084	EMW9FC8J3HN4	US	33.781897	-84.404009	676603	GEORGIA INST OF TECHNOLOGY		Non-Elite	female	81	ATLANTA	GA	BIOMED ENGR/COL ENGR/ENGR STA	303320415	UNITED STATES	N	7/1/21 0:00	##########	286	Non-SBIR/STTR	2021	249000	NIBIB	207797	#N/A
NIEHS	7916876	9/7/09 0:00	PA-09-036	4R00ES015555-02	4	R00	ES	15555	2		REINLIB, LESLIE J	9/7/09 0:00	7/31/12 0:00	NSS	8687099	1	PHARMACOLOGY	183710748	NHV3GTWSALA7	183710748	NHV3GTWSALA7	US	32.786754	-79.947265	7575301	MED U OF SOUTH CAROLINA		Non-Elite	female	96	CHARLESTON	SC	SCHOOLS OF PHARMACY	294074636	UNITED STATES	N	9/7/09 0:00	7/31/10 0:00	113	Non-SBIR/STTR	2009	249000	NIEHS		coastal
NINDS	9775729	9/18/18 0:00	PA-14-042	4R00NS092972-03	4	R00	NS	92972	3		DAVID, KAREN KATE	9/30/18 0:00	8/31/21 0:00	NST-2 Study Section [NST-2]	11416266	7	NEUROLOGY	604483045	FBYMGMHW4X95	604483045	FBYMGMHW4X95	US	42.33639	-71.07097	894901	BOSTON U MED CAMPUS		Non-Elite	male	99	BOSTON	MA	SCHOOLS OF MEDICINE	21182340	UNITED STATES	N	9/30/18 0:00	8/31/19 0:00	853	Other Research-Related	2018	249000	NINDS	202121	#N/A
NINDS	8134632	9/1/10 0:00	PA-10-063	4R00NS065120-02	4	R00	NS	65120	2		BABCOCK, DEBRA J	9/25/09 0:00	8/31/13 0:00	NSS	8926441	12	NEUROSURGERY	94878337	KMH5K9V7S518	94878337	KMH5K9V7S518	US	37.767442	-122.413937	577508	U OF CALIFORNIA SAN FRANCISCO		Elite	male	99	SAN FRANCISCO	CA	SCHOOLS OF MEDICINE	941432510	UNITED STATES	N	9/1/10 0:00	8/31/11 0:00	853	Non-SBIR/STTR	2010	249000	NINDS		#N/A
NLM	8136767	9/16/10 0:00	PA-07-297	4R00LM009837-03	4	R00	LM	9837	3		YE, JANE	9/30/10 0:00	9/29/13 0:00	Biomedical Informatics, Library and Data Sciences Review Committee[BLR]	6533458	9	BIOLOGY	800771594	ZUFBNVZ587D4	800771594	ZUFBNVZ587D4	US	29.703025	-95.403303	578417	U OF TEXAS HLTH SCI CTR HOUSTON		Non-Elite	male	100	HOUSTON	TX	SCHOOLS OF MEDICINE	770305400	UNITED STATES	N	9/30/10 0:00	9/29/11 0:00	879	Non-SBIR/STTR	2010	239423	NLM		coastal
NINDS	7892638	8/19/09 0:00	PA-09-036	4R00NS052524-03	4	R00	NS	52524	3		RIDDLE, ROBERT D	9/19/07 0:00	8/31/12 0:00	NSS	1861738	37	ANATOMY/CELL BIOLOGY	72933393	G88KLJR3KYT5	72933393	G88KLJR3KYT5	US	34.017282	-118.281254	7636101	U OF SOUTHERN CALIFORNIA		Non-Elite	female	96	Los Angeles	CA	SCHOOLS OF MEDICINE	900894304	UNITED STATES	N	9/1/09 0:00	8/31/10 0:00	853	Non-SBIR/STTR	2009	249000	NINDS		#N/A
NIMH	8878644	7/18/14 0:00	PA-11-197	4R00MH099093-03	4	R00	MH	99093	3		SIMMONS, JANINE M	8/1/14 0:00	7/31/17 0:00	NSS	10487541	3	PSYCHOLOGY	43207562	FL6GV84CKN57	43207562	FL6GV84CKN57	US	41.310925	-72.926428	9420201	YALE U		Elite	male	99	NEW HAVEN	CT	SCHOOLS OF ARTS AND SCIENCES	65208327	UNITED STATES	N	8/1/14 0:00	7/31/15 0:00	242	Non-SBIR/STTR	2014	248999	NIMH	149549	coastal
NIGMS	9331776	9/9/16 0:00	PA-14-042	4R00GM115757-02	4	R00	GM	115757	2		BENDER, MICHAEL T	9/15/15 0:00	8/31/19 0:00	NSS	11633035	1	CHEMISTRY	7431760	WCUGNQQ8DZU1	7431760	WCUGNQQ8DZU1	US	39.676639	-104.959481	2091901	U OF DENVER (COLORADO SEMINARY)	600	Non-Elite	male	99	DENVER	CO	SCHOOLS OF ARTS AND SCIENCES	802104711	UNITED STATES	N	9/15/16 0:00	8/31/17 0:00	859	Non-SBIR/STTR	2016	248977	NIGMS	178671	#N/A
NHLBI	8951671	11/17/14 0:00	PA-10-063	4R00HL105779-03	4	R00	HL	105779	3		GALIS, ZORINA S	12/1/14 0:00	11/30/17 0:00	NSS	9462625	9	MISCELLANEOUS	3137015	QDE5UHE5XD16	3137015	QDE5UHE5XD16	US	37.233061	-80.421005	8968001	VIRGINIA POLYTECHNIC INST AND ST U		Non-Elite	male	99	BLACKSBURG	VA	ORGANIZED RESEARCH UNITS	240616100	UNITED STATES	N	12/1/14 0:00	11/30/15 0:00	837	Non-SBIR/STTR	2015	248999	NHLBI	154658	#N/A
NIDCD	10485476	11/23/21	PA-18-398	4R00DC016906-03	4	R00	DC	16906	3		MILLER, ROGER	12/1/21	11/30/24	ZDC1-SRB-K(17)	12484658	37	OTOLARYNGOLOGY	72933393	G88KLJR3KYT5	72933393	G88KLJR3KYT5	US	34.017282	-118.281254	7636101	U OF SOUTHERN CALIFORNIA		Non-Elite	female	98	Los Angeles	CA	SCHOOLS OF MEDICINE	900894304	UNITED STATES	N	12/1/21	11/30/22	173	Non-SBIR/STTR	2022	248580	NIDCD	162866	#N/A
NICHD	9536278	8/25/17 0:00	PA-14-042	4R00HD081273-03	4	R00	HD	81273	3		ESPOSITO, LAYLA E	9/1/17 0:00	5/31/20 0:00	NSS	11206199	2	SOCIAL SCIENCES	161202122	LCLSJAGTNZQ7	161202122	LCLSJAGTNZQ7	US	43.068519	-89.400858	578503	U OF WISCONSIN MADISON		Elite	female	100	MADISON	WI	SCHOOLS OF ARTS AND SCIENCES	537151218	UNITED STATES	N	9/1/17 0:00	5/31/18 0:00	865	Non-SBIR/STTR	2017	246880	NICHD	164824	coastal
NIEHS	8471883	8/17/12 0:00		4R00ES019875-02	4	R00	ES	19875	2		HEINDEL, JERROLD	8/17/12 0:00	7/31/15 0:00	NSS	10454728	6	PUBLIC HEALTH & PREV MEDICINE	41387846	J22LNTMEDP73	41387846	J22LNTMEDP73	US	33.999623	-81.028249	1524302	U OF SOUTH CAROLINA AT COLUMBIA		Non-Elite	male	100	COLUMBIA	SC	SCHOOLS OF PUBLIC HEALTH	292080001	UNITED STATES	N	8/17/12 0:00	7/31/13 0:00	113	Non-SBIR/STTR	2012	248930	NIEHS	175400	#N/A
NHLBI	9203682	1/25/16 0:00	PA-11-197	4R00HL124070-04	4	R00	HL	124070	4		WONG, RENEE P	8/1/14 0:00	1/31/19 0:00	NSS	10441294	2	INTERNAL MEDICINE/MEDICINE	9095365	LL8GLEVH6MG3	9095365	LL8GLEVH6MG3	US	40.764542	-111.850317	514002	U OF UTAH		Non-Elite	male	100	SALT LAKE CITY	UT	SCHOOLS OF MEDICINE	841128906	UNITED STATES	N	2/1/16 0:00	1/31/17 0:00	837	Non-SBIR/STTR	2016	249000	NHLBI	167114	coastal
NINDS	10619110	9/20/22	PA-19-130	4R00NS117804-03	4	R00	NS	117804	3		KOENIG, JAMES I	7/15/20	6/30/25	NST-2 Study Section [NST-2]	12427694	3	PEDIATRICS	96997515	NPSNT86JKN51	96997515	NPSNT86JKN51	US	45.49882	-122.685647	6297007	OREGON HEALTH & SCI U		Non-Elite	male	100	PORTLAND	OR	SCHOOLS OF MEDICINE	972393098	UNITED STATES	N	9/20/22	6/30/23	853	Non-SBIR/STTR	2022	248737	NINDS	180803	coastal
NINDS	10460016	11/2/21	PA-19-130	4R00NS114166-03	4	R00	NS	114166	3		GNADT, JAMES W	12/1/21	11/30/24	NST-2 Study Section [NST-2]	15834305	3	PSYCHIATRY	43207562	FL6GV84CKN57	43207562	FL6GV84CKN57	US	41.310925	-72.926428	9420201	YALE U		Elite	female	98	NEW HAVEN	CT	SCHOOLS OF MEDICINE	65208327	UNITED STATES	N	12/1/21	11/30/22	853	Non-SBIR/STTR	2022	249000	NINDS	188572	#N/A
NIMH	10191343	8/11/20 0:00	PAR-18-814	4R00MH120051-03	4	R00	MH	120051	3		CHURCHILL, JAMES D	3/14/19 0:00	2/28/23 0:00	NSS	11504987	3	Unavailable	65968786	GV31TMFLPY88	65968786	GV31TMFLPY88	US	40.86755	-73.473456	4577101	COLD SPRING HARBOR lab		Non-Elite	male	99	COLD SPRING HARBOR	NY	Research Institutes	117242209	UNITED STATES	N	8/11/20 0:00	2/28/21 0:00	242	Non-SBIR/STTR	2020	249000	NIMH	129688	#N/A
NHLBI	8307142	9/19/11 0:00	PA-07-297	4R00HL096955-03	4	R00	HL	96955	3		COLOMBINI-HATCH, SANDRA	9/20/11 0:00	7/31/14 0:00	NSS	2245825	7	INTERNAL MEDICINE/MEDICINE	1910777	FTMTDMBR29C7	1910777	FTMTDMBR29C7	US	39.325256	-76.605131	4134401	JOHNS HOPKINS U		Elite	male	99	BALTIMORE	MD	SCHOOLS OF MEDICINE	212182680	UNITED STATES	N	9/20/11 0:00	7/31/12 0:00	837	Non-SBIR/STTR	2011	249000	NHLBI		coastal
NCI	7914685	8/28/09 0:00	PA-07-297	4R00CA134749-02	4	R00	CA	134749	2		TANDON, PUSHPA	9/17/08 0:00	6/30/12 0:00	Institutional Training and Education Study Section (F)[NCI-F]	9242233	5	RADIATION-DIAGNOSTIC/ONCOLOGY	965717143	GTNBNWXJ12D5	965717143	DWH7MSXKA2A8; GTNBNWXJ12D5	US	36.143381	-86.803365	8721001	VANDERBILT U		Non-Elite	male	99	Nashville	TN	SCHOOLS OF MEDICINE	372032408	UNITED STATES	N	7/1/09 0:00	6/30/10 0:00	398	Non-SBIR/STTR	2009	248413	NCI		coastal
NIDDK	10323755	##########	PA-19-130	4R00DK120875-03	4	R00	DK	120875	3		BURGESS-BEUSSE, BONNIE L	##########	##########	NSS	14400877	1	PHARMACOLOGY	41064767	DZ4YCZ3QSPR5	41064767	DZ4YCZ3QSPR5	US	39.129719	-84.520554	1523902	U OF CINCINNATI		Non-Elite	male	99	CINCINNATI	OH	SCHOOLS OF MEDICINE	452210001	UNITED STATES	N	2/12/21 0:00	##########	847	Non-SBIR/STTR	2021	249000	NIDDK	219487	#N/A
NINDS	8129025	8/23/10 0:00		4R00NS057266-02	4	R00	NS	57266	2		TALLEY, EDMUND M	9/1/10 0:00	8/31/13 0:00	NSS	8560141	12	NEUROLOGY	966668691	N4WWJC8T2593	809593387; 966668691	JJJNQAJY5RN6; N4WWJC8T2593	US	33.470962	-81.991405	676605	AUGUSTA U	809	Non-Elite	male	85	AUGUSTA	GA	SCHOOLS OF MEDICINE	309120004	UNITED STATES	N	9/1/10 0:00	8/31/11 0:00	853	Non-SBIR/STTR	2010	249000	NINDS		coastal
NIDCR	9868436	4/3/19 0:00	PA-16-077	4R00DE025915-03	4	R00	DE	25915	3		LUMELSKY, NADYA L	4/3/19 0:00	3/31/22 0:00	NSS	12355940	3	Unavailable	42250712	GM1XX56LEP58	42250712	GM1XX56LEP58	US	39.953462	-75.193983	6463801	U OF PENNSYLVANIA		Elite	male	58	PHILADELPHIA	PA	Domestic Higher Education	191046205	UNITED STATES	N	4/3/19 0:00	3/31/20 0:00	121	Non-SBIR/STTR	2019	248082	NIDCR	154088	coastal
NHLBI	8052212	7/6/10 0:00		4R00HL087936-03	4	R00	HL	87936	3		WERNER, ELLEN	7/6/10 0:00	5/31/13 0:00	NSS	8681423	32	Unavailable	27176833	NPH1VN32EWN5	27176833	NPH1VN32EWN5	US	34.127716	-117.972442	3058203	BECKMAN RES INST/CITY OF HOPE		Non-Elite	male	100	DUARTE	CA	Research Institutes	910103012	UNITED STATES	N	7/6/10 0:00	5/31/11 0:00	837	Non-SBIR/STTR	2010	249000	NHLBI		#N/A
NHLBI	8464354	8/15/12 0:00	PA-09-036	4R00HL103846-04	4	R00	HL	103846	4		CARLSON, DREW E	8/14/10 0:00	5/31/15 0:00	NSS	10228766	3	INTERNAL MEDICINE/MEDICINE	832127323	DLWBSLWAJWR1	832127323	DLWBSLWAJWR1	US	39.999598	-83.033131	6218701	OHIO STATE U		Non-Elite	female	75	COLUMBUS	OH	SCHOOLS OF MEDICINE	432101016	UNITED STATES	N	8/15/12 0:00	5/31/13 0:00	837	Non-SBIR/STTR	2012	249000	NHLBI	163279	coastal
NCI	9532338	9/6/17 0:00	PA-15-083	4R00CA197498-04	4	R00	CA	197498	4		MUFSON, R ALLAN	9/1/17 0:00	7/31/20 0:00	NSS	12422169	32	Unavailable	27176833	NPH1VN32EWN5	27176833	NPH1VN32EWN5	US	34.127716	-117.972442	3058203	BECKMAN RES INST/CITY OF HOPE		Non-Elite	male	92	DUARTE	CA	Research Institutes	910103012	UNITED STATES	N	9/1/17 0:00	7/31/18 0:00	396	Non-SBIR/STTR	2017	249000	NCI	230556	coastal
NHLBI	9377731	12/17/16 0:00	PA-15-083	4R00HL130593-03	4	R00	HL	130593	3		WOLZ, MICHAEL	12/19/16 0:00	11/30/19 0:00	NSS	12055257	9	PUBLIC HEALTH & PREV MEDICINE	800771594	ZUFBNVZ587D4	800771594	ZUFBNVZ587D4	US	29.703025	-95.403303	578417	U OF TEXAS HLTH SCI CTR HOUSTON		Non-Elite	male	71	HOUSTON	TX	SCHOOLS OF PUBLIC HEALTH	770305400	UNITED STATES	N	12/19/16 0:00	11/30/17 0:00	837	Non-SBIR/STTR	2017	248637	NHLBI	165310	#N/A
NHLBI	9513779	7/25/17 0:00	PA-11-197	4R00HL121152-03	4	R00	HL	121152	3		SCHWARTZ, LISA	8/1/17 0:00	7/31/20 0:00	NSS	10460539	7	Unavailable	79532263	MY2ERHGDV956	79532263	MY2ERHGDV956	US	42.349512	-71.063308	130301	TUFTS MED CTR		Non-Elite	male	99	BOSTON	MA	Independent Hospitals	21111552	UNITED STATES	N	8/1/17 0:00	7/31/18 0:00	837	Non-SBIR/STTR	2017	249000	NHLBI	142286	coastal
NCI	10232596	9/16/20 0:00	PA-18-398	4R00CA226353-02	4	R00	CA	226353	2		XU, WANPING	9/16/20 0:00	8/31/23 0:00	NSS	11097245	1	INTERNAL MEDICINE/MEDICINE	5421136	ZUE9HKT2CLC9	5421136	ZUE9HKT2CLC9	US	41.789554	-87.601172	1413601	U OF CHICAGO		Elite	female	74	CHICAGO	IL	SCHOOLS OF MEDICINE	606372612	UNITED STATES	N	9/16/20 0:00	8/31/21 0:00	396	Non-SBIR/STTR	2020	249000	NCI	157169	coastal
NIDCR	8508552	8/17/12 0:00	PA-11-197	4R00DE021442-03	4	R00	DE	21442	3		LUMELSKY, NADYA L	9/1/12 0:00	8/31/15 0:00	NSS	10322175	5	DENTISTRY	22254226	H6D6JMXJXDE6	22254226	H6D6JMXJXDE6	US	41.734182	-72.793791	1506603	U OF CONNECTICUT SCH OF MED/DNT		Non-Elite	female	100	FARMINGTON	CT	SCHOOLS OF DENTISTRY/ORAL HYGN	60305335	UNITED STATES	N	9/1/12 0:00	8/31/13 0:00	121	Non-SBIR/STTR	2012	249000	NIDCR	161688	#N/A
NICHD	8780946	1/29/14 0:00	PA-11-197	4R00HD073269-03	4	R00	HD	73269	3		HENKEN, DEBORAH B	8/1/12 0:00	12/31/16 0:00	NSS	11110559	10	BIOCHEMISTRY	4315578	NMJHD63STRC5	4315578	NMJHD63STRC5	US	33.931173	-83.378873	676602	U OF GEORGIA	1660	Non-Elite	male	100	ATHENS	GA	SCHOOLS OF ARTS AND SCIENCES	306021589	UNITED STATES	N	1/21/14 0:00	12/31/14 0:00	865	Non-SBIR/STTR	2014	231548	NICHD	162745	#N/A
NIGMS	10299750	##########	PA-18-398	4R00GM134154-03	4	R00	GM	134154	3		ADKINS, RONALD	9/9/19 0:00	##########	NSS	14375558	30	BIOLOGY	800771545	YZJ6DKPM4W63	800771545	YZJ6DKPM4W63	US	32.811963	-96.837534	578404	UT SOUTHWESTERN MED CTR		Non-Elite	male	69	DALLAS	TX	SCHOOLS OF MEDICINE	753909105	UNITED STATES	N	12/3/20 0:00	##########	859	Non-SBIR/STTR	2021	248999	NIGMS	152177	#N/A
NHGRI	7908044	8/31/09 0:00	PA-09-036	4R00HG004515-02	4	R00	HG	4515	2		GOOD, PETER J	9/28/08 0:00	8/31/12 0:00	NSS	8822513	6	GENETICS	1912864	M1LVPE5GLSD9	1912864	M1LVPE5GLSD9	US	40.481906	-74.457066	1196203	RUTGERS THE STATE U OF NJ		Non-Elite	male	99	PISCATAWAY	NJ	SCHOOLS OF ARTS AND SCIENCES	88543925	UNITED STATES	N	9/1/09 0:00	8/31/10 0:00	172	Non-SBIR/STTR	2009	248968	NHGRI		#N/A
NLM	10548543	2/7/22	PA-19-130	4R00LM013089-03	4	R00	LM	13089	3		WANG, YANLI	2/7/22	1/31/25	NSS	15515094	18	MISCELLANEOUS	4514360	MKAGLD59JRL1	4514360	MKAGLD59JRL1	US	40.440909	-79.959125	2059802	U OF PITTSBURGH AT PITTSBURGH		Elite	female	77	PITTSBURGH	PA	SCHOOLS OF MEDICINE	152133320	UNITED STATES	N	2/7/22	1/31/23	879	Non-SBIR/STTR	2022	236548	NLM	155331	coastal
NCI	8476392	7/30/12 0:00		4R00CA153929-04	4	R00	CA	153929	4		GRODZINSKI, PIOTR	8/1/12 0:00	7/31/15 0:00	NSS	10344372	2	PHARMACOLOGY	9095365	LL8GLEVH6MG3	9095365	LL8GLEVH6MG3	US	40.764542	-111.850317	514002	U OF UTAH		Non-Elite	male	83	SALT LAKE CITY	UT	SCHOOLS OF PHARMACY	841128906	UNITED STATES	N	8/1/12 0:00	7/31/13 0:00	394	Non-SBIR/STTR	2012	248722	NCI	173034	coastal
NCI	10247153	9/11/20 0:00	PA-19-130	4R00CA240896-02	4	R00	CA	240896	2		KUO, LILLIAN S	4/8/20 0:00	8/31/23 0:00	NSS	14775034	7	NEUROSURGERY	5436803	KG76WYENL5K1	5436803	KG76WYENL5K1	US	42.050479	-87.680046	6144650	NORTHWESTERN U		Elite	female	81	CHICAGO	IL	SCHOOLS OF MEDICINE	606114579	UNITED STATES	N	9/15/20 0:00	8/31/21 0:00	396	Non-SBIR/STTR	2020	249000	NCI	157595	coastal
NCI	8211876	2/1/11 0:00	PA-10-063	4R00CA135592-03	4	R00	CA	135592	3		SATHYAMOORTHY, NEERAJA	2/1/11 0:00	1/31/14 0:00	NSS	9255942	7	Unavailable	71723621	C1CPANL3EWK4	71723621	C1CPANL3EWK4	US	42.33982	-71.10568	758101	BETH ISRAEL DEACONESS MED CTR		Elite	male	100	BOSTON	MA	Independent Hospitals	22155400	UNITED STATES	N	2/1/11 0:00	1/31/12 0:00	396	Non-SBIR/STTR	2011	241529	NCI		coastal
NCI	10443952	8/9/21 0:00	PA-18-398	4R00CA234097-03	4	R00	CA	234097	3		GRIL, BRUNILDE M	7/1/19 0:00	##########	Transition to Independence Study Section (I)[NCI-I]	14756490	11	OTHER BASIC SCIENCES	135781701	M5QFLTCTSQN6	135781701	M5QFLTCTSQN6	US	41.502657	-81.622127	10000858	CLEVELAND CLINIC LERNER COM CWRU		Non-Elite	unknown	50	CLEVELAND	OH	SCHOOLS OF MEDICINE	441950001	UNITED STATES	N	7/1/21 0:00	##########	398	Non-SBIR/STTR	2021	248999	NCI	154658	coastal
NIDCR	10579393	5/5/22	PA-19-130	4R00DE028573-04	4	R00	DE	28573	4		BROWN, ANISSA F	5/1/22	4/30/25	NSS	14506588	11	Unavailable	135781701	M5QFLTCTSQN6	135781701	M5QFLTCTSQN6	US	41.502657	-81.622127	10000858	CLEVELAND CLINIC LERNER COM CWRU		Non-Elite	male	100	CLEVELAND	OH	Domestic Higher Education	441950001	UNITED STATES	N	5/1/22	4/30/23	121	Non-SBIR/STTR	2022	248999	NIDCR	154658	#N/A
NEI	10527611	1/10/22	PA-18-398	4R00EY029759-03	4	R00	EY	29759	3		FLANDERS, MARTHA C	8/1/19	1/31/25	NSS	11340427	3	NEUROLOGY	47120084	TX2DAGQPENZ5	47120084	TX2DAGQPENZ5	US	38.543366	-121.72946	577503	U OF CALIFORNIA AT DAVIS		Non-Elite	female	54	DAVIS	CA	SCHOOLS OF MEDICINE	956186153	UNITED STATES	N	2/1/22	1/31/23	867	Non-SBIR/STTR	2022	249000	NEI	174816	coastal
NICHD	7496818	1/3/08 0:00		4R00HD055052-03	4	R00	HD	55052	3		TASCA, RICHARD J	12/1/06 0:00	12/31/10 0:00	NSS	8195995	7	BIOLOGY	1910777	FTMTDMBR29C7	1910777	FTMTDMBR29C7	US	39.325256	-76.605131	4134401	JOHNS HOPKINS U		Elite	male	52	BALTIMORE	MD	SCHOOLS OF ARTS AND SCIENCES	212182680	UNITED STATES	N	1/1/08 0:00	12/31/08 0:00	864	Non-SBIR/STTR	2008	249000	NICHD		#N/A
NIDA	8999625	6/12/15 0:00	PA-11-197	4R00DA033371-03	4	R00	DA	33371	3		SHIH, MING L	6/15/15 0:00	5/31/18 0:00	NSS	10310557	2	PHARMACOLOGY	144017188	CJDNG9D14MW7	144017188	CJDNG9D14MW7	US	41.486042	-71.528656	6969201	U OF RHODE ISLAND	613	Non-Elite	male	57	KINGSTON	RI	SCHOOLS OF PHARMACY	28810811	UNITED STATES	N	6/15/15 0:00	5/31/16 0:00	279	Non-SBIR/STTR	2015	248521	NIDA	161903	coastal
NEI	8535887	9/7/12 0:00		4R00EY019706-03	4	R00	EY	19706	3		SHEN, GRACE L	9/30/12 0:00	8/31/15 0:00	NSS	9356864	14	OPHTHALMOLOGY	800771149	MSPWVMXXMN76	800771149	MSPWVMXXMN76	US	29.311028	-94.778007	578406	U OF TEXAS MED BR GALVESTON		Non-Elite	male	75	GALVESTON	TX	SCHOOLS OF MEDICINE	775555302	UNITED STATES	N	9/30/12 0:00	8/31/13 0:00	867	Non-SBIR/STTR	2012	249000	NEI	167768	#N/A
NIDDK	8105746	8/13/10 0:00	PA-10-063	4R00DK077443-03	4	R00	DK	77443	3		SPAIN, LISA M	9/1/10 0:00	8/31/13 0:00	NSS	8413767	5	PEDIATRICS	937639060	E8VWJXMMUQ67	937639060	E8VWJXMMUQ67	US	43.04575	-88.020374	46001	MED COLL OF WISCONSIN	1037	Non-Elite	male	66	MILWAUKEE	WI	SCHOOLS OF MEDICINE	532263548	UNITED STATES	N	9/1/10 0:00	8/31/11 0:00	847	Non-SBIR/STTR	2010	249000	NIDDK		#N/A
NCI	8994367	1/30/15 0:00	PA-11-197	4R00CA175290-03	4	R00	CA	175290	3		HANLON, SEAN E	2/1/15 0:00	1/31/18 0:00	NSS	10338943	9	BIOSTATISTICS & OTHER MATH SCI	800772139	S3GMKS8ELA16	800772139	S3GMKS8ELA16	US	29.706319	-95.397195	578407	U OF TX MD ANDERSON CAN CTR		Non-Elite	female	69	HOUSTON	TX	HOSPITALS	770304009	UNITED STATES	N	2/1/15 0:00	1/31/16 0:00	393	Non-SBIR/STTR	2015	249000	NCI	155625	#N/A
NLM	9260987	4/22/16 0:00	PA-14-042	4R00LM011933-02	4	R00	LM	11933	2		SIM, HUA-CHUAN	5/1/15 0:00	4/30/19 0:00	Biomedical Informatics, Library and Data Sciences Review Committee[BLR]	10576401	5	Unavailable	79917897	GYLUH9UXHDX5	79917897	GYLUH9UXHDX5	US	36.143784	-86.800995	10040927	VANDERBILT U MED CTR		Non-Elite	male	83	NASHVILLE	TN	Independent Hospitals	372320011	UNITED STATES	N	5/1/16 0:00	4/30/17 0:00	879	Non-SBIR/STTR	2016	250586	NLM	158599	coastal
NEI	9483938	8/8/17 0:00	PA-14-042	4R00EY024992-04	4	R00	EY	24992	4		NEUHOLD, LISA	8/10/17 0:00	6/30/20 0:00	NSS	11740238	18	OPHTHALMOLOGY	4514360	MKAGLD59JRL1	4514360	MKAGLD59JRL1	US	40.440909	-79.959125	2059802	U OF PITTSBURGH AT PITTSBURGH		Elite	female	90	PITTSBURGH	PA	SCHOOLS OF MEDICINE	152133320	UNITED STATES	N	8/10/17 0:00	6/30/18 0:00	867	Non-SBIR/STTR	2017	249000	NEI	188681	coastal
NHLBI	10543714	3/29/22	PA-19-130	4R00HL153678-03	4	R00	HL	153678	3		HILL-PRYOR, CRYSTAL DARLEANE-ROBIN	4/1/22	3/31/25	NSS	12540029	14	BIOCHEMISTRY	800771149	MSPWVMXXMN76	800771149	MSPWVMXXMN76	US	29.311028	-94.778007	578406	U OF TEXAS MED BR GALVESTON		Non-Elite	male	93	GALVESTON	TX	SCHOOLS OF MEDICINE	775555302	UNITED STATES	N	4/1/22	3/31/23	839	Non-SBIR/STTR	2022	248855	NHLBI	187566	#N/A
NIEHS	9882649	4/24/19 0:00	PA-16-193	4R00ES027870-03	4	R00	ES	27870	3		CUI, YUXIA	12/1/17 0:00	4/30/22 0:00	ZES1-LAT-D(K1)	14515960	37	PUBLIC HEALTH & PREV MEDICINE	72933393	G88KLJR3KYT5	72933393	G88KLJR3KYT5	US	34.017282	-118.281254	7636101	U OF SOUTHERN CALIFORNIA		Non-Elite	male	90	Los Angeles	CA	SCHOOLS OF MEDICINE	900894304	UNITED STATES	N	5/1/19 0:00	4/30/20 0:00	113	Non-SBIR/STTR	2019	248934	NIEHS	150869	coastal
NHLBI	9377179	2/6/17 0:00	PA-11-197	4R00HL122368-03	4	R00	HL	122368	3		GALIS, ZORINA S	2/6/17 0:00	1/31/20 0:00	NSS	11776065	32	Unavailable	27176833	NPH1VN32EWN5	27176833	NPH1VN32EWN5	US	34.127716	-117.972442	3058203	BECKMAN RES INST/CITY OF HOPE		Non-Elite	male	64	DUARTE	CA	Research Institutes	910103012	UNITED STATES	N	2/6/17 0:00	1/31/18 0:00	837	Non-SBIR/STTR	2017	249000	NHLBI	183529	#N/A
NCI	10454456	##########	RFA-OD-18-008	4R00CA242589-02	4	R00	CA	242589	2		BLAKE, KELLY D	9/1/18 0:00	##########	Special Emphasis Panel[ZRG1-RPHB-N(58)R]	15655946	6	NONE	78795880	MNJ3PQ7MXFN6	78795880	MNJ3PQ7MXFN6	US	40.526177	-74.471208	10034175	RBHS SCH OF PUBLIC HEALTH		Non-Elite	female	97	PISCATAWAY	NJ	SCHOOLS OF PUBLIC HEALTH	88548021	UNITED STATES	N	9/1/21 0:00	##########	77	Non-SBIR/STTR	2021	249000	OD	158599	#N/A
NIDCD	10505099	11/23/21	PA-18-397	4R00DC017490-04	4	R00	DC	17490	4		SHEKIM, LANA O	9/1/19	11/30/24	Communication Disorders Review Committee[CDRC]	1953803	7	Unavailable	605122258	UE5KCLMVSHU1	605122258	UE5KCLMVSHU1	US	42.374956	-71.05421	10008064	MGH INST OF HEALTH PROFESSIONS		Non-Elite	female	96	Charlestown	MA	Domestic For-Profits	21294557	UNITED STATES	N	12/1/21	11/30/22	173	Non-SBIR/STTR	2022	248976	NIDCD	155610	coastal
NIDDK	10333023	3/2/21 0:00	PA-19-130	4R00DK123407-03	4	R00	DK	123407	3		GREENWEL, PATRICIA	3/2/21 0:00	##########	NSS	15244007	13	GENETICS	621889815	QHF5ZZ114M72	621889815	QHF5ZZ114M72	US	40.8415	-73.9414	1833205	COLUMBIA U HEALTH SCI		Elite	male	56	NEW YORK	NY	SCHOOLS OF MEDICINE	100323725	UNITED STATES	N	3/2/21 0:00	##########	847	Non-SBIR/STTR	2021	249000	NIDDK	153704	#N/A
NHLBI	9722488	8/3/18 0:00	PA-16-193	4R00HL138272-02	4	R00	HL	138272	2		HSU, LUCY L	7/1/17 0:00	6/30/21 0:00	NSS	14611574	11	OTHER BASIC SCIENCES	135781701	M5QFLTCTSQN6	135781701	M5QFLTCTSQN6	US	41.502657	-81.622127	10000858	CLEVELAND CLINIC LERNER COM CWRU		Non-Elite	male	100	CLEVELAND	OH	SCHOOLS OF MEDICINE	441950001	UNITED STATES	N	8/4/18 0:00	6/30/19 0:00	837	Non-SBIR/STTR	2018	249000	NHLBI	155625	#N/A
NCI	8121276	8/11/10 0:00	PA-06-133	4R00CA127357-03	4	R00	CA	127357	3		TANDON, PUSHPA	9/17/08 0:00	8/31/13 0:00	NSS	6603998	3	PATHOLOGY	16060860	YXJGGNC5J269	16060860	YXJGGNC5J269	US	39.026584	-94.636347	1484303	U OF KANSAS MED CTR		Non-Elite	female	93	KANSAS CITY	KS	SCHOOLS OF MEDICINE	661608500	UNITED STATES	N	9/1/10 0:00	8/31/11 0:00	394	Non-SBIR/STTR	2010	249000	NCI		#N/A
NHLBI	8780804	1/17/14 0:00	PA-10-063	4R00HL107642-03	4	R00	HL	107642	3		CARLSON, DREW E	1/1/12 0:00	12/31/16 0:00	NSS	10217223	7	Unavailable	30811269	QN6MS4VN7BD1	30811269	QN6MS4VN7BD1	US	42.336107	-71.107481	1080401	BRIGHAM AND WOMENS HOSP		Elite	female	98	BOSTON	MA	Independent Hospitals	21156110	UNITED STATES	N	1/1/14 0:00	12/31/14 0:00	837	Non-SBIR/STTR	2014	249000	NHLBI	140977	#N/A
NHLBI	9281936	8/19/16 0:00	PA-11-197	4R00HL119605-03	4	R00	HL	119605	3		ADHIKARI, BISHOW B	4/1/14 0:00	8/31/19 0:00	NSS	10488531	5	PHARMACOLOGY	41485301	XRJSGX384TD6	41485301	XRJSGX384TD6	US	46.728892	-117.155742	9082001	WASHINGTON STATE U		Non-Elite	unknown		PULLMAN	WA	SCHOOLS OF PHARMACY	991641060	UNITED STATES	N	9/1/16 0:00	8/31/17 0:00	837	Non-SBIR/STTR	2016	249000	NHLBI	163816	coastal
NINDS	9782341	11/30/18 0:00	PA-15-083	4R00NS097638-03	4	R00	NS	97638	3		LEENDERS, MIRIAM	7/15/16 0:00	11/30/21 0:00	NST-2 Study Section [NST-2]	9428270	6	NEUROSCIENCES	939017877	H1HYA8Z1NTM5	939017877	H1HYA8Z1NTM5	US	38.040959	-84.505885	2793601	U OF KENTUCKY		Non-Elite	male	99	LEXINGTON	KY	SCHOOLS OF MEDICINE	405260001	UNITED STATES	N	12/1/18 0:00	11/30/19 0:00	853	Non-SBIR/STTR	2019	248999	NINDS	188725	coastal
NIBIB	10489858	##########	PA-18-398	4R00EB028325-03	4	R00	EB	28325	3		RUSSELL, LUISA MARIE	##########	##########	NSS	15664289	18	CHEMISTRY	36837920	QKWEF8XLMTT3	36837920	QKWEF8XLMTT3	US	29.718091	-95.336483	1449402	U OF HOUSTON	1012	Non-Elite	male	75	HOUSTON	TX	SCHOOLS OF ARTS AND SCIENCES	772042610	UNITED STATES	N	9/22/21 0:00	##########	286	Non-SBIR/STTR	2021	249000	NIBIB	208799	#N/A
NIA	9920905	5/28/19 0:00	PA-15-083	4R00AG051735-03	4	R00	AG	51735	3		KERR, CANDACE L	6/1/19 0:00	12/31/21 0:00	NSS	12230016	5	Unavailable	77333797	NGCNCJ1X6XA4	77333797	NGCNCJ1X6XA4	US	35.482988	-97.49781	6239601	OKLAHOMA MED RES FOUNDATION		Non-Elite	female	89	OKLAHOMA CITY	OK	Research Institutes	731045005	UNITED STATES	N	6/1/19 0:00	12/31/19 0:00	866	Non-SBIR/STTR	2019	249000	NIA	142449	coastal
NCI	9404639	1/6/17 0:00	PA-15-083	4R00CA204592-02	4	R00	CA	204592	2		READ-CONNOLE, ELIZABETH LEE	1/1/17 0:00	12/31/19 0:00	NSS	10169713	98	MICROBIOLOGY/IMMUN/VIROLOGY	43990498	ECR5E2LU5BL6	43990498	ECR5E2LU5BL6	US	38.898075	-77.043933	2863301	GEORGE WASHINGTON U	1085	Non-Elite	female	99	WASHINGTON	DC	SCHOOLS OF MEDICINE	200520042	UNITED STATES	N	1/1/17 0:00	12/31/17 0:00	393	Non-SBIR/STTR	2017	249000	NCI	156113	coastal
NIGMS	8020468	3/15/10 0:00		4R00GM084157-03	4	R00	GM	84157	3		ANDERSON, VERNON	4/1/08 0:00	2/28/13 0:00	NSS	9093607	2	BIOCHEMISTRY	153926712	VGJHK59NMPK9	153926712	VGJHK59NMPK9	US	42.386914	-72.521131	850904	U OF MASSACHUSETTS AMHERST	1104	Non-Elite	male	99	HADLEY	MA	SCHOOLS OF ARTS AND SCIENCES	10359450	UNITED STATES	N	3/15/10 0:00	2/28/11 0:00	859	Non-SBIR/STTR	2010	249000	NIGMS		coastal
NIA	10311133	2/4/21 0:00	PA-16-193	4R00AG059950-03	4	R00	AG	59950	3		PATMIOS, GEORGEANNE E	##########	6/1/21 0:00	NSS	14978022	7	SOCIAL SCIENCES	149617367	UNVDZNFA8R29	149617367	UNVDZNFA8R29	US	42.335306	-71.102775	3212904	HARVARD SCH OF PUBLIC HEALTH		Elite	female	98	BOSTON	MA	SCHOOLS OF PUBLIC HEALTH	21156028	UNITED STATES	N	1/15/19 0:00	6/1/21 0:00	866	Non-SBIR/STTR	2021	31317	NIA	19635	#N/A
NIAMS	9904809	6/25/19 0:00	PA-16-193	4R00AR071517-03	4	R00	AR	71517	3		WASHABAUGH, CHARLES H	7/1/19 0:00	6/30/22 0:00	Arthritis and Musculoskeletal and Skin Diseases Special Grants Study Section[AMS]	14179004	2	OTHER HEALTH PROFESSIONS	62761671	Z1H9VJS8NG16	62761671	Z1H9VJS8NG16	US	41.664405	-91.542152	3972901	U OF IOWA		Non-Elite	female	98	IOWA CITY	IA	SCHOOLS OF MEDICINE	522421320	UNITED STATES	N	7/1/19 0:00	6/30/20 0:00	846	Non-SBIR/STTR	2019	249000	NIAMS	164736	#N/A
NIDA	8292684	8/9/11 0:00	PA-11-197	4R00DA026293-03	4	R00	DA	26293	3		LAWRENCE, DIANE M	9/1/11 0:00	8/31/14 0:00	NSS	9047534	2	MICROBIOLOGY/IMMUN/VIROLOGY	57123192	QD4MGHFDJKU1	57123192	QD4MGHFDJKU1	US	39.980272	-75.157051	8240301	TEMPLE U OF THE COMMONWEALTH		Non-Elite	male	69	PHILADELPHIA	PA	SCHOOLS OF MEDICINE	191226003	UNITED STATES	N	9/1/11 0:00	8/31/12 0:00	279	Non-SBIR/STTR	2011	249000	NIDA		#N/A
NCI	8794530	3/17/14 0:00	PA-10-063	4R00CA157945-03	4	R00	CA	157945	3		AULT, GRACE S	8/1/11 0:00	2/28/17 0:00	NSS	10368985	7	Unavailable	71723621	C1CPANL3EWK4	71723621	C1CPANL3EWK4	US	42.33982	-71.10568	758101	BETH ISRAEL DEACONESS MED CTR		Elite	female	55	BOSTON	MA	Independent Hospitals	22155400	UNITED STATES	N	3/17/14 0:00	2/28/15 0:00	396	Non-SBIR/STTR	2014	224100	NCI	128793	#N/A
NINDS	8062811	4/16/10 0:00		4R00NS061952-03	4	R00	NS	61952	3		MITLER, MERRILL	5/1/08 0:00	4/30/13 0:00	NSS	7894753	3	ZOOLOGY	47120084	TX2DAGQPENZ5	47120084	TX2DAGQPENZ5	US	38.543366	-121.72946	577503	U OF CALIFORNIA AT DAVIS		Non-Elite	female	98	DAVIS	CA	EARTH SCIENCES/RESOURCES	956186153	UNITED STATES	N	6/1/10 0:00	4/30/11 0:00	853	Non-SBIR/STTR	2010	249000	NINDS		coastal
NCI	10620367	7/1/22	PA-19-130	4R00CA248944-03	4	R00	CA	248944	3		LI, JERRY	3/1/20	6/30/25	Transition to Independence Study Section (I)[NCI-I]	15588534	18	INTERNAL MEDICINE/MEDICINE	4514360	MKAGLD59JRL1	4514360	MKAGLD59JRL1	US	40.440909	-79.959125	2059802	U OF PITTSBURGH AT PITTSBURGH		Elite	male	100	PITTSBURGH	PA	SCHOOLS OF MEDICINE	152133320	UNITED STATES	N	7/1/22	6/30/23	398	Non-SBIR/STTR	2022	249000	NCI	156604	coastal
NHLBI	8599807	3/15/13 0:00	PA-09-036	4R00HL097068-03	4	R00	HL	97068	3		NI, HANYU	9/1/10 0:00	1/31/16 0:00	NSS	9635226	7	Unavailable	30811269	QN6MS4VN7BD1	30811269	QN6MS4VN7BD1	US	42.336107	-71.107481	1080401	BRIGHAM AND WOMENS HOSP		Elite	female	98	BOSTON	MA	Independent Hospitals	21156110	UNITED STATES	N	4/1/13 0:00	1/31/14 0:00	837	Non-SBIR/STTR	2013	244725	NHLBI	192697	coastal
NCI	9381105	12/2/16 0:00	PA-11-197	4R00CA188593-03	4	R00	CA	188593	3		WATSON, JOANNA M	12/2/16 0:00	11/30/19 0:00	NSS	12004764	7	BIOCHEMISTRY	47814256	NPT2UNTNHJZ1	47814256	NPT2UNTNHJZ1	US	39.766782	-84.085913	253101	WRIGHT STATE U	446	Non-Elite	male	100	DAYTON	OH	SCHOOLS OF MEDICINE	454350001	UNITED STATES	N	12/2/16 0:00	11/30/17 0:00	396	Non-SBIR/STTR	2017	249000	NCI	168243	coastal
NCI	9391828	12/29/16 0:00	PA-14-042	4R00CA190658-03	4	R00	CA	190658	3		STRASBURGER, JENNIFER	1/1/17 0:00	12/31/19 0:00	NSS	10777000	3	PHARMACOLOGY	42250712	GM1XX56LEP58	42250712	GM1XX56LEP58	US	39.953462	-75.193983	6463801	U OF PENNSYLVANIA		Elite	male	88	PHILADELPHIA	PA	SCHOOLS OF MEDICINE	191046205	UNITED STATES	N	1/1/17 0:00	12/31/17 0:00	396	Non-SBIR/STTR	2017	248999	NCI	154658	#N/A
NCI	8211874	3/8/11 0:00		4R00CA126187-03	4	R00	CA	126187	3		TANDON, PUSHPA	9/8/08 0:00	3/31/14 0:00	NSS	8630608	25	BIOMEDICAL ENGINEERING	41294109	F27KDXZMF9Y8	41294109	F27KDXZMF9Y8	US	43.131774	-77.63546	7047101	U OF ROCHESTER		Non-Elite	female	98	ROCHESTER	NY	BIOMED ENGR/COL ENGR/ENGR STA	146270140	UNITED STATES	N	4/1/11 0:00	3/31/12 0:00	394	Non-SBIR/STTR	2011	241532	NCI		coastal
NEI	10311650	3/1/21 0:00	PAR-18-814	4R00EY030840-03	4	R00	EY	30840	3		FLANDERS, MARTHA C	9/1/19 0:00	##########	NSS	12630708	5	BIOSTATISTICS & OTHER MATH SCI	97394084	EMW9FC8J3HN4	97394084	EMW9FC8J3HN4	US	33.781897	-84.404009	676603	GEORGIA INST OF TECHNOLOGY		Non-Elite	female	99	ATLANTA	GA	SCHOOLS OF ARTS AND SCIENCES	303320415	UNITED STATES	N	1/1/21 0:00	##########	867	Non-SBIR/STTR	2021	245158	NEI	164414	coastal
NHLBI	9174153	1/18/16 0:00	PA-11-197	4R00HL118163-03	4	R00	HL	118163	3		ADHIKARI, BISHOW B	2/1/16 0:00	1/31/19 0:00	NSS	9295126	3	INTERNAL MEDICINE/MEDICINE	53284659	R8JEVL4ULGB7	53284659	R8JEVL4ULGB7	US	39.948207	-75.157825	4050801	THOMAS JEFFERSON U		Non-Elite	male	99	PHILADELPHIA	PA	SCHOOLS OF MEDICINE	191074418	UNITED STATES	N	2/1/16 0:00	1/31/17 0:00	837	Non-SBIR/STTR	2016	248999	NHLBI	159615	#N/A
NCI	9839714	2/8/19 0:00	PA-15-083	4R00CA208028-03	4	R00	CA	208028	3		YASSIN, RIHAB R	2/8/19 0:00	1/31/22 0:00	NSS	11641242	3	Unavailable	73757627	G7MQPLSUX1L4	73757627	G7MQPLSUX1L4	US	39.946632	-75.196604	1499101	CHILDRENS HOSP OF PHILADELPHIA		Elite	male	99	PHILADELPHIA	PA	Independent Hospitals	191462305	UNITED STATES	N	2/8/19 0:00	1/31/20 0:00	396	Non-SBIR/STTR	2019	247956	NCI	141477	coastal
NIAID	9039860	6/30/15 0:00	PA-11-197	4R00AI093884-02	4	R00	AI	93884	2		DECKHUT-AUGUSTINE, ALISON M	3/15/12 0:00	6/30/17 0:00	NSS	10441085	12	MICROBIOLOGY/IMMUN/VIROLOGY	73133571	GNJ7BBP73WE9	73133571	GNJ7BBP73WE9	US	42.275494	-83.743038	1506502	U OF MICHIGAN AT ANN ARBOR		Elite	male	100	ANN ARBOR	MI	SCHOOLS OF MEDICINE	481091276	UNITED STATES	N	7/1/15 0:00	6/30/16 0:00	855	Non-SBIR/STTR	2015	240245	NIAID	158615	coastal
NIMH	8671411	8/13/13 0:00	PA-10-063	4R00MH093412-03	4	R00	MH	93412	3		ASANUMA, CHIIKO	8/15/13 0:00	7/31/16 0:00	NSS	8960226	4	Unavailable	45896339	MJ3JH8CRJBZ7	45896339	MJ3JH8CRJBZ7	US	42.336956	-71.170504	872101	BOSTON COLL	796	Non-Elite	male	99	CHESTNUT HILL	MA	Domestic Higher Education	24673800	UNITED STATES	N	8/15/13 0:00	7/31/14 0:00	242	Non-SBIR/STTR	2013	249000	NIMH	167301	coastal
NIDDK	10409049	7/2/21 0:00	PA-16-193	4R00DK115895-03	4	R00	DK	115895	3		COOKE, BRAD	##########	##########	NSS	10688288	4	PSYCHOLOGY	608195277	D3LHU66KBLD5	608195277	D3LHU66KBLD5	US	35.9316	-79.057377	578206	U OF NORTH CAROLINA CHAPEL HILL		Elite	male	99	CHAPEL HILL	NC	SCHOOLS OF ARTS AND SCIENCES	275995023	UNITED STATES	N	7/15/21 0:00	##########	847	Non-SBIR/STTR	2021	248999	NIDDK	232820	#N/A
NIDCR	10480977	##########	PA-16-193	4R00DE031148-02	4	R00	DE	31148	2		WAN, JASON	##########	##########	Arthritis and Musculoskeletal and Skin Diseases Special Grants Study Section[AMS]	9463924	7	NONE	188435911	Z9CRZKD42ZT1	188435911	Z9CRZKD42ZT1	US	39.292248	-76.625629	820104	U OF MARYLAND BALTIMORE	1664	Non-Elite	female	98	BALTIMORE	MD	SCHOOLS OF DENTISTRY/ORAL HYGN	212011508	UNITED STATES	N	9/14/21 0:00	##########	121	Other Research-Related	2021	249000	NIDCR	177039	coastal
NIDDK	9646468	4/12/18 0:00	PA-15-083	4R00DK110534-03	4	R00	DK	110534	3		PERRIN, PETER J	4/12/18 0:00	4/11/21 0:00	NSS	11298051	52	PATHOLOGY	804355790	UYTTZT6G9DT1	804355790	UYTTZT6G9DT1	US	32.876991	-117.24087	577507	U OF CALIFORNIA SAN DIEGO		Elite	female	100	LA JOLLA	CA	SCHOOLS OF MEDICINE	920930621	UNITED STATES	N	4/12/18 0:00	4/11/19 0:00	847	Non-SBIR/STTR	2018	249000	NIDDK	158936	coastal
NHLBI	9278325	6/15/16 0:00	PA-11-197	4R00HL114651-03	4	R00	HL	114651	3		TIGNO, XENIA	8/1/13 0:00	5/31/19 0:00	NSS	11135703	3	INTERNAL MEDICINE/MEDICINE	43207562	FL6GV84CKN57	43207562	FL6GV84CKN57	US	41.310925	-72.926428	9420201	YALE U		Elite	female	91	NEW HAVEN	CT	SCHOOLS OF MEDICINE	65208327	UNITED STATES	N	6/15/16 0:00	5/31/17 0:00	838	Non-SBIR/STTR	2016	248017	NHLBI	148144	#N/A
NHLBI	9291565	7/23/16 0:00	PA-14-042	4R00HL124279-03	4	R00	HL	124279	3		ITURRIAGA, ERIN	5/18/15 0:00	7/31/19 0:00	NSS	10205250	37	BIOMEDICAL ENGINEERING	72933393	G88KLJR3KYT5	72933393	G88KLJR3KYT5	US	34.017282	-118.281254	7636101	U OF SOUTHERN CALIFORNIA		Non-Elite	female	69	Los Angeles	CA	BIOMED ENGR/COL ENGR/ENGR STA	900894304	UNITED STATES	N	8/16/16 0:00	7/31/17 0:00	837	Non-SBIR/STTR	2016	248999	NHLBI	207242	coastal
NICHD	8248352	4/11/11 0:00	PA-07-297	4R00HD058044-03	4	R00	HD	58044	3		WINER, KAREN	9/1/09 0:00	3/31/14 0:00	NSS	9110925	13	BIOLOGY	41071101	KXNVA7JCC5K6	41071101	KXNVA7JCC5K6	US	41.152425	-81.337881	1523302	KENT STATE U	793	Non-Elite	male	99	KENT	OH	SCHOOLS OF ARTS AND SCIENCES	442420001	UNITED STATES	N	4/10/11 0:00	3/31/12 0:00	865	Non-SBIR/STTR	2011	249000	NICHD		#N/A
NEI	8142504	9/27/10 0:00		4R00EY019072-03	4	R00	EY	19072	3		STEINMETZ, MICHAEL A	9/1/10 0:00	8/31/13 0:00	NSS	6357328	3	Unavailable	65968786	GV31TMFLPY88	65968786	GV31TMFLPY88	US	40.86755	-73.473456	4577101	COLD SPRING HARBOR lab		Non-Elite	female	98	COLD SPRING HARBOR	NY	Research Institutes	117242209	UNITED STATES	N	9/1/10 0:00	8/31/11 0:00	867	Non-SBIR/STTR	2010	248999	NEI		#N/A
NHLBI	9722389	8/3/18 0:00	PA-14-042	4R00HL128906-03	4	R00	HL	128906	3		LUO, JAMES	8/3/15 0:00	7/31/21 0:00	NSS	11758846	3	ANATOMY/CELL BIOLOGY	806345617	ED44Y3W6P7B9	806345617	ED44Y3W6P7B9	US	32.232844	-110.959467	490201	U OF ARIZONA		Non-Elite	male	99	TUCSON	AZ	SCHOOLS OF MEDICINE	857210158	UNITED STATES	N	8/3/18 0:00	7/31/19 0:00	837	Non-SBIR/STTR	2018	249000	NHLBI	178158	#N/A
NHLBI	9514428	7/26/17 0:00	PA-14-042	4R00HL123638-03	4	R00	HL	123638	3		WELNIAK, LISBETH A	9/15/15 0:00	8/31/20 0:00	NSS	10572784	5	INTERNAL MEDICINE/MEDICINE	555917996	KABJZBBJ4B54	555917996	KABJZBBJ4B54	US	44.975143	-93.227003	1450402	U OF MINNESOTA		Non-Elite	male	99	MINNEAPOLIS	MN	SCHOOLS OF MEDICINE	554552070	UNITED STATES	N	9/1/17 0:00	8/31/18 0:00	837	Non-SBIR/STTR	2017	248996	NHLBI	162565	#N/A
NICHD	9233223	4/7/16 0:00	PA-11-197	4R00HD071968-03	4	R00	HD	71968	3		COULOMBE, JAMES N	4/8/16 0:00	3/31/19 0:00	NSS	10542450	7	BIOCHEMISTRY	604483045	FBYMGMHW4X95	604483045	FBYMGMHW4X95	US	42.33639	-71.07097	894901	BOSTON U MED CAMPUS		Non-Elite	male	99	BOSTON	MA	SCHOOLS OF MEDICINE	21182340	UNITED STATES	N	4/8/16 0:00	3/31/17 0:00	865	Non-SBIR/STTR	2016	249000	NICHD	155465	coastal
NHLBI	7925984	9/11/09 0:00	PA-07-297	4R00HL089361-02	4	R00	HL	89361	2		GAO, YUNLING	9/15/09 0:00	7/31/12 0:00	NSS	8508633	1	BIOLOGY	172750234	QB12VPNQQFE8	172750234	QB12VPNQQFE8	US	30.688966	-88.189832	130401	U OF SOUTH ALABAMA	679	Non-Elite	female	98	MOBILE	AL	SCHOOLS OF MEDICINE	366880002	UNITED STATES	N	9/15/09 0:00	7/31/10 0:00	837	Non-SBIR/STTR	2009	249000	NHLBI		coastal
NHLBI	9171602	1/19/16 0:00	PA-11-197	4R00HL121172-03	4	R00	HL	121172	3		CARLSON, DREW E	5/1/14 0:00	1/31/19 0:00	NSS	10245876	5	PUBLIC HEALTH & PREV MEDICINE	65391526	JJG6HU8PA4S5	65391526	JJG6HU8PA4S5	US	38.050527	-78.500531	1526402	U OF VIRGINIA		Non-Elite	male	96	CHARLOTTESVILLE	VA	SCHOOLS OF MEDICINE	229044195	UNITED STATES	N	2/1/16 0:00	1/31/17 0:00	837	Non-SBIR/STTR	2016	249000	NHLBI	231626	coastal
NEI	9977379	9/6/19 0:00	PA-16-193	4R00EY027844-03	4	R00	EY	27844	3		GREENWELL, THOMAS	4/1/17 0:00	5/31/22 0:00	NSS	11659586	1	OPHTHALMOLOGY	68552207	L6NFUM28LQM5	68552207	L6NFUM28LQM5	US	38.664368	-90.323797	9083901	WASHINGTON U		Non-Elite	male	99	SAINT LOUIS	MO	SCHOOLS OF MEDICINE	631304862	UNITED STATES	N	6/1/19 0:00	5/31/20 0:00	867	Non-SBIR/STTR	2019	249000	NEI	158725	#N/A
NICHD	8729091	9/9/13 0:00	PA-10-063	4R00HD065832-03	4	R00	HD	65832	3		MILLER, BRETT	9/10/13 0:00	6/30/16 0:00	NSS	8027298	37	NEUROLOGY	72933393	G88KLJR3KYT5	72933393	G88KLJR3KYT5	US	34.017282	-118.281254	7636101	U OF SOUTHERN CALIFORNIA		Non-Elite	female	93	Los Angeles	CA	SCHOOLS OF MEDICINE	900894304	UNITED STATES	N	9/10/13 0:00	6/30/14 0:00	865	Non-SBIR/STTR	2013	248999	NICHD	151752	coastal
NIEHS	8842799	6/25/14 0:00	PA-11-197	4R00ES022269-03	4	R00	ES	22269	3		THOMPSON, CLAUDIA L	7/1/14 0:00	6/30/17 0:00	NSS	10528305	4	Unavailable	785979618	LT9CXX8L19G1	785979618	LT9CXX8L19G1	US	40.57951	-105.081267	1725201	COLORADO STATE U		Non-Elite	female	99	FORT COLLINS	CO	Domestic Higher Education	805232002	UNITED STATES	N	7/1/14 0:00	6/30/15 0:00	113	Non-SBIR/STTR	2014	248961	NIEHS	167425	#N/A
NIDA	8269330	7/29/11 0:00	PA-07-297	4R00DA024754-03	4	R00	DA	24754	3		LIN, GERALINE	8/1/11 0:00	7/31/14 0:00	NSS	9105913	26	PHARMACOLOGY	38633251	LMCJKRFW5R81	38633251	LMCJKRFW5R81	US	43.003074	-78.785924	5992614	STATE U OF NEW YORK AT BUFFALO		Non-Elite	male	99	AMHERST	NY	SCHOOLS OF MEDICINE	142282567	UNITED STATES	N	8/1/11 0:00	7/31/12 0:00	279	Non-SBIR/STTR	2011	249001	NIDA		#N/A
NIEHS	9424932	3/30/17 0:00	PA-14-042	4R00ES024455-03	4	R00	ES	24455	3		SHREFFLER, CAROL A	4/1/17 0:00	3/31/20 0:00	NSS	11103740	5	PHARMACOLOGY	41485301	XRJSGX384TD6	41485301	XRJSGX384TD6	US	46.728892	-117.155742	9082001	WASHINGTON STATE U		Non-Elite	male	99	PULLMAN	WA	SCHOOLS OF PHARMACY	991641060	UNITED STATES	N	4/1/17 0:00	3/31/18 0:00	113	Non-SBIR/STTR	2017	249000	NIEHS	190350	#N/A
NIEHS	8992934	3/3/15 0:00	PA-11-197	4R00ES022986-03	4	R00	ES	22986	3		KIRSHNER, ANNETTE G	3/3/15 0:00	12/31/17 0:00	NSS	10812078	7	PUBLIC HEALTH & PREV MEDICINE	604483045	FBYMGMHW4X95	604483045	FBYMGMHW4X95	US	42.33639	-71.07097	894901	BOSTON U MED CAMPUS		Non-Elite	male	87	BOSTON	MA	SCHOOLS OF PUBLIC HEALTH	21182340	UNITED STATES	N	3/3/15 0:00	12/31/15 0:00	113	Non-SBIR/STTR	2015	248999	NIEHS	152107	#N/A
NHLBI	7651877	9/24/08 0:00	PA-06-133	4R00HL089185-03	4	R00	HL	89185	3		KALTMAN, JONATHAN R	9/25/08 0:00	7/31/11 0:00	NSS	8717064	7	PHYSIOLOGY	1910777	FTMTDMBR29C7	1910777	FTMTDMBR29C7	US	39.325256	-76.605131	4134401	JOHNS HOPKINS U		Elite	male	99	BALTIMORE	MD	SCHOOLS OF MEDICINE	212182680	UNITED STATES	N	9/25/08 0:00	7/31/09 0:00	837	Non-SBIR/STTR	2008	241641	NHLBI		#N/A
NICHD	9507051	8/1/17 0:00	PA-11-197	4R00HD081204-02	4	R00	HD	81204	2		KENT, TRAVIS JOHN	8/1/17 0:00	7/31/20 0:00	NSS	11978574	17	VETERINARY SCIENCES	847205713	KU3DCFJJTVN3	847205713	KU3DCFJJTVN3	US	30.611331	-96.348373	8266920	TEXAS A&M AGRILIFE RES	2561	Non-Elite	female	91	College Station	TX	SCHOOLS OF VETERINARY MEDICINE	77845	UNITED STATES	N	8/1/17 0:00	7/31/18 0:00	865	Non-SBIR/STTR	2017	249000	NICHD	228921	#N/A
NHLBI	8130444	8/26/10 0:00	PA-07-297	4R00HL093352-04	4	R00	HL	93352	4		SCHWARTZ, LISA	9/1/10 0:00	6/30/13 0:00	NSS	6192680	1	Unavailable	75710996	N876TLXYGCG4	75710996	N876TLXYGCG4	US	41.811681	-71.409371	6959701	RHODE ISLAND HOSP		Non-Elite	male	99	PROVIDENCE	RI	Independent Hospitals	29034923	UNITED STATES	N	9/1/10 0:00	6/30/11 0:00	837	Non-SBIR/STTR	2010	249000	NHLBI		#N/A
NHLBI	8529684	8/22/12 0:00		4R00HL097150-02	4	R00	HL	97150	2		CHANG, HENRY	9/1/11 0:00	5/31/15 0:00	NSS	3053249	9	Unavailable	67717892	JL4JHE9SDRR3	67717892	JL4JHE9SDRR3	US	35.155607	-90.045279	7893501	ST JUDE CHILDRENS RES HOSP		Non-Elite	male	99	MEMPHIS	TN	Independent Hospitals	381053678	UNITED STATES	N	8/22/12 0:00	5/31/13 0:00	839	Non-SBIR/STTR	2012	249000	NHLBI	190535	#N/A
NIMHD	10499993	2/24/22	PA-19-130	4R00MD014738-03	4	R00	MD	14738	3		WONNUM, SUNDANIA J W	9/23/20	4/30/25	ZMD1-XLN(M1)	10756799	3	PHYSIOLOGY	928824473	X59NJBFL8BJ3	928824473	X59NJBFL8BJ3	US	32.328724	-90.175537	5390304	U OF MISSISSIPPI MED CTR		Non-Elite	male	99	JACKSON	MS	SCHOOLS OF MEDICINE	392164500	UNITED STATES	N	5/1/22	4/30/23	307	Non-SBIR/STTR	2022	249000	NIMHD	160645	coastal
NHLBI	8989245	8/10/15 0:00	PA-11-197	4R00HL111217-03	4	R00	HL	111217	3		COLOMBINI-HATCH, SANDRA	8/1/12 0:00	7/31/18 0:00	NSS	10206797	1	Unavailable	71284913	JZD1HLM2ZU83	71284913	JZD1HLM2ZU83	US	39.140663	-84.501007	615001	CINCINNATI CHILDRENS HOSP MED CTR		Non-Elite	male	100	CINCINNATI	OH	Independent Hospitals	452293039	UNITED STATES	N	8/15/15 0:00	7/31/16 0:00	837	Non-SBIR/STTR	2015	248999	NHLBI	159615	coastal
NIMH	8203130	3/15/11 0:00	PA-10-063	4R00MH085859-02	4	R00	MH	85859	2		PANCHISION, DAVID M	3/15/11 0:00	2/28/14 0:00	NSS	6472589	7	PSYCHIATRY	63690705	YND4PLMC9AN7	63690705	YND4PLMC9AN7	US	33.50591	-86.799772	1288803	U OF ALABAMA AT BIRMINGHAM		Non-Elite	female	98	BIRMINGHAM	AL	SCHOOLS OF MEDICINE	352940001	UNITED STATES	N	3/15/11 0:00	2/29/12 0:00	242	Non-SBIR/STTR	2011	231167	NIMH		#N/A
NHLBI	9513789	7/29/17 0:00	PA-14-042	4R00HL125899-03	4	R00	HL	125899	3		TIGNO, XENIA	9/4/15 0:00	8/31/20 0:00	NSS	12101407	12	INTERNAL MEDICINE/MEDICINE	60217502	YNT8TCJH8FQ8	60217502	YNT8TCJH8FQ8	US	40.7607	-73.9603	1514803	WEILL MED COLL OF CORNELL U	1734	Elite	female	98	NEW YORK	NY	SCHOOLS OF MEDICINE	100654805	UNITED STATES	N	9/1/17 0:00	8/31/18 0:00	837	Non-SBIR/STTR	2017	249000	NHLBI	146903	coastal
NIDCD	8870860	8/15/14 0:00	PA-11-197	4R00DC013107-02	4	R00	DC	13107	2		SKLARE, DAN	8/18/14 0:00	3/31/18 0:00	NSS	11294464	98	BIOLOGY	49515844	TF2CMKY1HMX9	49515844	TF2CMKY1HMX9	US	38.905206	-77.07547	2869001	GEORGETOWN U		Non-Elite	male	99	WASHINGTON	DC	SCHOOLS OF ARTS AND SCIENCES	200570001	UNITED STATES	N	8/18/14 0:00	7/31/15 0:00	173	Non-SBIR/STTR	2014	249000	NIDCD	187552	coastal
NINR	9981215	9/11/19 0:00	PA-16-193	4R00NR016686-03	4	R00	NR	16686	3		KEHL, KAREN	9/15/17 0:00	7/31/22 0:00	NSS	11839293	6	NONE	41096314	MW8JHK6ZYEX8	41096314	MW8JHK6ZYEX8	US	39.745098	-104.837605	1199905	U OF COLORADO DENVER		Non-Elite	female	99	Aurora	CO	SCHOOLS OF NURSING	800452570	UNITED STATES	N	8/1/19 0:00	7/31/20 0:00	361	Non-SBIR/STTR	2019	248991	NINR	160123	coastal
NIA	10470973	##########	PA-19-130	4R00AG068271-02	4	R00	AG	68271	2		YAO, ALISON Q	9/1/21 0:00	##########	NSS	11478300	5	Unavailable	780007410	M3GAQBN4BWH6	780007410	M3GAQBN4BWH6	US	34.72523	-86.691036	10011070	HUDSON ALPHA INST FOR BIOTECHNOLOGY		Non-Elite	male	93	HUNTSVILLE	AL	Research Institutes	358062908	UNITED STATES	N	9/1/21 0:00	##########	866	Non-SBIR/STTR	2021	249000	NIA	168871	#N/A
NIMH	9185523	7/13/16 0:00	PA-11-197	4R00MH102349-03	4	R00	MH	102349	3		GRABB, MARGARET C	7/15/16 0:00	5/31/19 0:00	NSS	8959614	4	PSYCHOLOGY	608195277	D3LHU66KBLD5	608195277	D3LHU66KBLD5	US	35.9316	-79.057377	578206	U OF NORTH CAROLINA CHAPEL HILL		Elite	female	98	CHAPEL HILL	NC	SCHOOLS OF ARTS AND SCIENCES	275995023	UNITED STATES	N	7/15/16 0:00	5/31/17 0:00	242	Non-SBIR/STTR	2016	248999	NIMH	163815	coastal
NEI	8311181	9/5/11 0:00	PA-09-036	4R00EY020844-03	4	R00	EY	20844	3		STEINMETZ, MICHAEL A	8/1/10 0:00	8/31/14 0:00	NSS	10212415	18	NEUROSCIENCES	4514360	MKAGLD59JRL1	4514360	MKAGLD59JRL1	US	40.440909	-79.959125	2059802	U OF PITTSBURGH AT PITTSBURGH		Elite	female	98	PITTSBURGH	PA	SCHOOLS OF ARTS AND SCIENCES	152133320	UNITED STATES	N	9/30/11 0:00	8/31/12 0:00	867	Non-SBIR/STTR	2011	248314	NEI		#N/A
NIA	9658631	4/4/18 0:00	PA-15-083	4R00AG052570-02	4	R00	AG	52570	2		DIBATTISTA, AMANDA	4/15/18 0:00	12/31/20 0:00	NSS	14082678	4	PHYSIOLOGY	608195277	D3LHU66KBLD5	608195277	D3LHU66KBLD5	US	35.9316	-79.057377	578206	U OF NORTH CAROLINA CHAPEL HILL		Elite	female	98	CHAPEL HILL	NC	SCHOOLS OF MEDICINE	275995023	UNITED STATES	N	4/15/18 0:00	12/31/18 0:00	866	Non-SBIR/STTR	2018	248999	NIA	164384	coastal
NINDS	8849550	6/5/14 0:00	PA-11-197	4R00NS080985-03	4	R00	NS	80985	3		GUBITZ, AMELIE	6/15/14 0:00	5/31/17 0:00	NSS	12198008	4	NEUROLOGY	608195277	D3LHU66KBLD5	608195277	D3LHU66KBLD5	US	35.9316	-79.057377	578206	U OF NORTH CAROLINA CHAPEL HILL		Elite	male	100	CHAPEL HILL	NC	SCHOOLS OF MEDICINE	275995023	UNITED STATES	N	6/15/14 0:00	5/31/15 0:00	853	Non-SBIR/STTR	2014	248961	NINDS	163790	#N/A
NINDS	8073828	6/18/10 0:00	PA-10-063	4R00NS064173-03	4	R00	NS	64173	3		WONG, MAY	1/1/09 0:00	6/30/13 0:00	NSS	8402004	At-Large	ENGINEERING (ALL TYPES)	59007500	T72NHKM259N3	59007500	T72NHKM259N3	US	39.714507	-75.738715	2076701	U OF DELAWARE	1177	Non-Elite	male	99	NEWARK	DE	BIOMED ENGR/COL ENGR/ENGR STA	197160099	UNITED STATES	N	7/1/10 0:00	6/30/11 0:00	853	Non-SBIR/STTR	2010	249000	NINDS		#N/A
NHLBI	8413072	6/19/12 0:00	PA-07-297	4R00HL095769-03	4	R00	HL	95769	3		CARLSON, DREW E	7/1/10 0:00	5/31/15 0:00	NSS	7162747	3	BIOCHEMISTRY	57588857	E1KJM4T54MK6	57588857	E1KJM4T54MK6	US	38.215024	-85.760145	4679701	U OF LOUISVILLE	959	Non-Elite	female	96	LOUISVILLE	KY	SCHOOLS OF MEDICINE	402920001	UNITED STATES	N	6/19/12 0:00	5/31/13 0:00	837	Non-SBIR/STTR	2012	249000	NHLBI	170167	coastal
NIMH	8773729	3/3/14 0:00	PA-11-197	4R00MH096801-03	4	R00	MH	96801	3		ROSSI, ANDREW	3/3/14 0:00	12/31/16 0:00	NSS	9535131	10	OTHER BASIC SCIENCES	130029205	T3NGNR66YK89	130029205	T3NGNR66YK89	US	40.740542	-74.172677	1196204	RUTGERS THE STATE U OF NJ NEWARK	554	Non-Elite	male	99	NEWARK	NJ	SCHOOLS OF ARTS AND SCIENCES	71021808	UNITED STATES	N	3/3/14 0:00	12/31/14 0:00	242	Non-SBIR/STTR	2014	249000	NIMH	160645	coastal
NIAMS	9750423	9/17/18 0:00	PA-16-193	4R00AR070914-02	4	R00	AR	70914	2		KIRILUSHA, ANTHONY G	9/14/18 0:00	7/31/21 0:00	Arthritis and Musculoskeletal and Skin Diseases Special Grants Study Section[AMS]	10524197	2	RADIATION-DIAGNOSTIC/ONCOLOGY	62761671	Z1H9VJS8NG16	62761671	Z1H9VJS8NG16	US	41.664405	-91.542152	3972901	U OF IOWA		Non-Elite	male	97	IOWA CITY	IA	SCHOOLS OF MEDICINE	522421320	UNITED STATES	N	9/14/18 0:00	7/31/19 0:00	846	Non-SBIR/STTR	2018	249000	NIAMS	163279	coastal
NHLBI	9926566	6/12/19 0:00	PA-15-083	4R00HL133451-03	4	R00	HL	133451	3		GALIS, ZORINA S	9/15/16 0:00	6/30/22 0:00	NSS	10828224	9	PHARMACOLOGY	941884009	X1M1PN3KG3E7	941884009	X1M1PN3KG3E7	US	35.138829	-90.033163	578302	U OF TENNESSEE HEALTH SCI CTR	1271	Non-Elite	male	99	MEMPHIS	TN	SCHOOLS OF PHARMACY	381034903	UNITED STATES	N	7/1/19 0:00	6/30/20 0:00	837	Non-SBIR/STTR	2019	249000	NHLBI	211830	coastal
NCI	10548287	3/31/22	PA-19-130	4R00CA252443-02	4	R00	CA	252443	2		DASCHNER, PHILLIP J	7/6/20	3/31/25	Transition to Independence Study Section (I)[NCI-I]	16145314	12	INTERNAL MEDICINE/MEDICINE	60217502	YNT8TCJH8FQ8	60217502	YNT8TCJH8FQ8	US	40.7607	-73.9603	1514803	WEILL MED COLL OF CORNELL U		Elite	male	100	NEW YORK	NY	SCHOOLS OF MEDICINE	100654805	UNITED STATES	N	4/1/22	3/31/23	398	Non-SBIR/STTR	2022	249000	NCI	146903	coastal
NINDS	7682632	9/18/08 0:00		4R00NS057931-03	4	R00	NS	57931	3		TALLEY, EDMUND M	12/1/06 0:00	8/31/11 0:00	NSS	8630492	3	ANATOMY/CELL BIOLOGY	43207562	FL6GV84CKN57	43207562	FL6GV84CKN57	US	41.310925	-72.926428	9420201	YALE U		Elite	male	99	NEW HAVEN	CT	SCHOOLS OF MEDICINE	65208327	UNITED STATES	N	9/15/08 0:00	8/31/09 0:00	853	Non-SBIR/STTR	2008	249000	NINDS		coastal
NHLBI	9120457	8/19/15 0:00	PA-11-197	4R00HL122397-02	4	R00	HL	122397	2		CARLSON, DREW E	9/1/14 0:00	8/31/18 0:00	NSS	10473387	3	ANATOMY/CELL BIOLOGY	806345617	ED44Y3W6P7B9	806345617	ED44Y3W6P7B9	US	32.232844	-110.959467	490201	U OF ARIZONA		Non-Elite	male	98	TUCSON	AZ	SCHOOLS OF MEDICINE	857210158	UNITED STATES	N	9/1/15 0:00	8/31/16 0:00	837	Non-SBIR/STTR	2015	248999	NHLBI	162656	#N/A
NINR	10458311	##########	PA-19-130	4R00NR018876-03	4	R00	NR	18876	3		BANKS, DAVID	##########	##########	Nursing Science Review Committee[NRRC(75)]	12410508	2	NONE	614209054	WNTPS995QBM7	614209054	WNTPS995QBM7	US	41.811419	-72.247553	1506602	U OF CONNECTICUT STORRS	1970	Non-Elite	female	99	STORRS-MANSFIELD	CT	SCHOOLS OF NURSING	62691133	UNITED STATES	N	9/1/21 0:00	##########	361	Other Research-Related	2021	248644	NINR	154437	coastal
NHLBI	7751749	2/20/09 0:00	PA-07-297	4R00HL089412-03	4	R00	HL	89412	3		SRINIVAS, POTHUR R	2/23/09 0:00	1/31/12 0:00	NSS	3084573	5	INTERNAL MEDICINE/MEDICINE	65391526	JJG6HU8PA4S5	65391526	JJG6HU8PA4S5	US	38.050527	-78.500531	1526402	U OF VIRGINIA		Non-Elite	female	98	CHARLOTTESVILLE	VA	SCHOOLS OF MEDICINE	229044195	UNITED STATES	N	2/23/09 0:00	1/31/10 0:00	837	Non-SBIR/STTR	2009	248999	NHLBI		#N/A
NIA	10304363	##########	PA-18-398	4R00AG063896-03	4	R00	AG	63896	3		WILLIAMS, JOHN	7/1/19 0:00	##########	NSS	11106413	7	ENGINEERING (ALL TYPES)	49435266	THL6A6JLE1S7	49435266	THL6A6JLE1S7	US	42.349594	-71.099726	10001093	BOSTON U (CHARLES RIVER CAMPUS)		Non-Elite	female	100	BOSTON	MA	BIOMED ENGR/COL ENGR/ENGR STA	22151390	UNITED STATES	N	1/1/21 0:00	##########	866	Non-SBIR/STTR	2021	249000	NIA	150909	#N/A
NIMH	9739586	7/31/18 0:00	PA-15-083	4R00MH110343-03	4	R00	MH	110343	3		GREENWOOD, GREGORY	8/1/18 0:00	7/31/21 0:00	NSS	9198474	6	PUBLIC HEALTH & PREV MEDICINE	41387846	J22LNTMEDP73	41387846	J22LNTMEDP73	US	33.999623	-81.028249	1524302	U OF SOUTH CAROLINA AT COLUMBIA		Non-Elite	male	98	COLUMBIA	SC	SCHOOLS OF PUBLIC HEALTH	292080001	UNITED STATES	N	8/1/18 0:00	7/31/19 0:00	242	Non-SBIR/STTR	2018	248997	NIMH	169964	#N/A
NIMH	9816021	2/12/19 0:00	PA-16-077	4R00MH111926-03	4	R00	MH	111926	3		ROSSI, ANDREW	2/12/19 0:00	11/30/21 0:00	NSS	12077214	12	NEUROSCIENCES	41968306	NX9PXMKW5KW8	41968306	NX9PXMKW5KW8	US	40.729659	-73.997018	5998301	NEW YORK U		Elite	female	98	NEW YORK	NY	SCHOOLS OF ARTS AND SCIENCES	100122300	UNITED STATES	N	2/12/19 0:00	11/30/19 0:00	242	Non-SBIR/STTR	2019	249000	NIMH	174666	coastal
NLM	8894203	8/12/14 0:00	PA-11-197	4R00LM011393-02	4	R00	LM	11393	2		VANBIERVLIET, ALAN	9/1/13 0:00	8/31/17 0:00	Biomedical Informatics, Library and Data Sciences Review Committee[BLR]	10414640	2	MISCELLANEOUS	9095365	LL8GLEVH6MG3	9095365	LL8GLEVH6MG3	US	40.764542	-111.850317	514002	U OF UTAH		Non-Elite	male	99	SALT LAKE CITY	UT	SCHOOLS OF MEDICINE	841128906	UNITED STATES	N	9/1/14 0:00	8/31/15 0:00	879	Non-SBIR/STTR	2014	224100	NLM	150403	#N/A
NIA	10212522	9/1/20 0:00	PA-16-193	4R00AG059918-03	4	R00	AG	59918	3		WISE, BRADLEY C	7/15/18 0:00	5/31/23 0:00	NSS	11174841	12	Unavailable	99992430	KH6NJ6ND8737	99992430	KH6NJ6ND8737	US	37.767618	-122.394315	1567601	J DAVID GLADSTONE INSTS		Non-Elite	male	99	SAN FRANCISCO	CA	Research Institutes	941582261	UNITED STATES	N	9/15/20 0:00	5/31/21 0:00	866	Non-SBIR/STTR	2020	249000	NIA	219343	coastal
NIDA	9840964	4/29/19 0:00	PA-16-193	4R00DA043609-03	4	R00	DA	43609	3		LIN, YU	5/1/19 0:00	4/30/22 0:00	NSS	10742197	3	PSYCHIATRY	42250712	GM1XX56LEP58	42250712	GM1XX56LEP58	US	39.953462	-75.193983	6463801	U OF PENNSYLVANIA		Elite	male	99	PHILADELPHIA	PA	SCHOOLS OF MEDICINE	191046205	UNITED STATES	N	5/1/19 0:00	4/30/20 0:00	279	Non-SBIR/STTR	2019	250044	NIDA	172595	#N/A
NIBIB	8474382	6/15/12 0:00		4R00EB012165-03	4	R00	EB	12165	3		KROSNICK, STEVEN	8/1/10 0:00	6/30/15 0:00	NSS	9849027	3	RADIATION-DIAGNOSTIC/ONCOLOGY	42250712	GM1XX56LEP58	42250712	GM1XX56LEP58	US	39.953462	-75.193983	6463801	U OF PENNSYLVANIA		Elite	male	99	PHILADELPHIA	PA	SCHOOLS OF MEDICINE	191046205	UNITED STATES	N	7/1/12 0:00	6/30/13 0:00	286	Non-SBIR/STTR	2012	248984	NIBIB	155615	coastal
NHLBI	9513809	8/5/17 0:00	PA-15-083	4R00HL130456-02	4	R00	HL	130456	2		GALIS, ZORINA S	9/30/16 0:00	8/31/20 0:00	NSS	11535895	3	EMERGENCY MEDICINE	928824473	X59NJBFL8BJ3	928824473	X59NJBFL8BJ3	US	32.328724	-90.175537	5390304	U OF MISSISSIPPI MED CTR		Non-Elite	female	98	JACKSON	MS	SCHOOLS OF MEDICINE	392164500	UNITED STATES	N	9/1/17 0:00	8/31/18 0:00	837	Non-SBIR/STTR	2017	248999	NHLBI	173419	coastal
NHLBI	9656206	3/21/18 0:00	PA-14-042	4R00HL129474-03	4	R00	HL	129474	3		SCHWARTZ, LISA	8/20/15 0:00	3/31/21 0:00	NSS	11268342	5	BIOLOGY	10197887	MN2YF7KQHHJ5	10197887	MN2YF7KQHHJ5	US	46.070887	-118.329603	9253001	WHITMAN COLL		Non-Elite	male	99	WALLA WALLA	WA	SCHOOLS OF ARTS AND SCIENCES	993622067	UNITED STATES	N	4/1/18 0:00	3/31/19 0:00	837	Non-SBIR/STTR	2018	249000	NHLBI	210245	#N/A
NIA	8926619	9/18/14 0:00	PA-11-197	4R00AG042491-03	4	R00	AG	42491	3		WILLIAMS, JOHN	8/1/12 0:00	4/30/17 0:00	NSS	11121506	23	ENGINEERING (ALL TYPES)	872612445	G56PUALJ3KT5	872612445	CCV3WG2JG248; D4H1NV4APKP3; ELS2M3C6V2S5; EQA8NBEN9WD5; FFAZGE9NH3M8; G56PUALJ3KT5; K6JRCJJXFET1; M8FBSLHASMT3; P4LRVQT1H4K5; PJUVN8AT5416; RT1JPM9UMGM5; ZBMGUAZYFGC4; ZMP8BDLJTUW9	US	42.438	-76.4625	1514802	CORNELL U		Elite	male	99	ITHACA	NY	BIOMED ENGR/COL ENGR/ENGR STA	148502820	UNITED STATES	N	9/30/14 0:00	4/30/15 0:00	866	Non-SBIR/STTR	2014	248999	NIA	154658	coastal
NIA	8303802	8/23/11 0:00	PA-10-063	4R00AG030677-03	4	R00	AG	30677	3		JOSEPH, LYNDON	9/1/11 0:00	8/31/14 0:00	NSS	8802257	7	Unavailable	71723621	C1CPANL3EWK4	71723621	C1CPANL3EWK4	US	42.33982	-71.10568	758101	BETH ISRAEL DEACONESS MED CTR		Elite	female	98	BOSTON	MA	Independent Hospitals	22155400	UNITED STATES	N	9/1/11 0:00	8/31/12 0:00	866	Non-SBIR/STTR	2011	249000	NIA		#N/A
NIDCR	9057242	5/15/15 0:00	PA-11-197	4R00DE024194-03	4	R00	DE	24194	3		SCHOLNICK, STEVEN	5/1/15 0:00	4/30/18 0:00	NSS	9665737	5	GENETICS	22254226	H6D6JMXJXDE6	22254226	H6D6JMXJXDE6	US	41.734182	-72.793791	1506603	U OF CONNECTICUT SCH OF MED/DNT		Non-Elite	male	98	FARMINGTON	CT	SCHOOLS OF MEDICINE	60305335	UNITED STATES	N	5/1/15 0:00	4/30/16 0:00	121	Non-SBIR/STTR	2015	249000	NIDCR	156113	coastal
NIDA	7762074	4/16/09 0:00	PA-06-133	4R00DA023680-03	4	R00	DA	23680	3		VOLMAN, SUSAN	3/1/09 0:00	2/29/12 0:00	NSS	8764362	7	PHARMACOLOGY	604483045	FBYMGMHW4X95	604483045	FBYMGMHW4X95	US	42.33639	-71.07097	894901	BOSTON U MED CAMPUS		Non-Elite	male	99	BOSTON	MA	SCHOOLS OF MEDICINE	21182340	UNITED STATES	N	3/1/09 0:00	2/28/10 0:00	279	Non-SBIR/STTR	2009	249000	NIDA		#N/A
NHLBI	8780806	3/21/14 0:00	PA-11-197	4R00HL115123-03	4	R00	HL	115123	3		CARLSON, DREW E	8/20/12 0:00	3/31/17 0:00	NSS	9455409	1	NONE	1785542	E3FDXZ6TBHW3	1785542	E3FDXZ6TBHW3	US	41.826136	-71.404513	1003201	BROWN U		Elite	female	97	PROVIDENCE	RI	BIOMED ENGR/COL ENGR/ENGR STA	29034202	UNITED STATES	N	4/1/14 0:00	3/31/15 0:00	837	Non-SBIR/STTR	2014	249000	NHLBI	153231	#N/A
NIA	9699761	9/21/18 0:00	PA-16-077	4R00AG052647-03	4	R00	AG	52647	3		FAZIO, ELENA	9/30/18 0:00	5/31/20 0:00	NSS	11888948	37	FAMILY MEDICINE	72933393	G88KLJR3KYT5	72933393	G88KLJR3KYT5	US	34.017282	-118.281254	7636101	U OF SOUTHERN CALIFORNIA		Non-Elite	male	80	Los Angeles	CA	SCHOOLS OF MEDICINE	900894304	UNITED STATES	N	9/30/18 0:00	5/31/19 0:00	866	Non-SBIR/STTR	2018	144697	NIA	116381	coastal
NCI	7887002	9/1/09 0:00	PA-06-133	4R00CA125994-03	4	R00	CA	125994	3		COUCH, JENNIFER A	7/18/07 0:00	6/30/12 0:00	ZCA1-RTRB-A(M1)	3111370	18	BIOMEDICAL ENGINEERING	9214214	HJD6G4D6TJY5	9214214	HJD6G4D6TJY5	US	37.426852	-122.17047	8046501	STANFORD U		Elite	male	99	STANFORD	CA	SCHOOLS OF MEDICINE	943052004	UNITED STATES	N	7/1/09 0:00	6/30/10 0:00	398	Non-SBIR/STTR	2009	249000	NCI		coastal
NIDA	10175425	8/19/20 0:00	PA-18-398	4R00DA047432-03	4	R00	DA	47432	3		BERTON, OLIVIER	9/1/20 0:00	8/31/23 0:00	NSS	12409686	1	Unavailable	45911138	N1UBCLRAPNG6	45911138	N1UBCLRAPNG6	US	35.056187	-106.579056	679302	LOVELACE BIOMED & ENVIRONMENTAL RES INST		Non-Elite	male	99	Albuquerque	NM	Research Institutes	871085127	UNITED STATES	N	9/1/20 0:00	8/31/21 0:00	279	Non-SBIR/STTR	2020	249000	NIDA	153000	coastal
NCI	8121272	9/23/10 0:00	PA-07-297	4R00CA133190-03	4	R00	CA	133190	3		SATHYAMOORTHY, NEERAJA	9/23/10 0:00	8/31/13 0:00	NSS	8666881	7	NONE	603007902	SHHBRBAPSM35	603007902; 625168166	DKNHLK3NBPH7; DL9MTNNKWYR9; GY8GKRUWM7D5; HA48EWMJFV47; HCNBFNDANNV5; HCRDU7BNPZ13; HCWTYJ7KQ4U6; HEBLAL94JHP7; NKCRSKVJBXE3; SHHBRBAPSM35; TA1NYNZ27LQ7; WJJRCLJ936C8; X51WYC1QEPD7; XNBJV454V2W1; YCJNP5NJYCY1; YW8WNKKANDR9	US	39.779213	-86.175288	577806	INDIANA U PURDUE U AT INDIANAPOLIS		Non-Elite	male	60	INDIANAPOLIS	IN	SCHOOLS OF MEDICINE	462022915	UNITED STATES	N	9/23/10 0:00	8/31/11 0:00	396	Non-SBIR/STTR	2010	249000	NCI		coastal
NIEHS	10637607	9/8/22	PA-19-130	4R00ES032029-03	4	R00	ES	32029	3		BOYLES, ABEE	9/8/22	8/31/25	ZES1-SRC(99)	11589068	12	PEDIATRICS	121911077	M5SZJ6VHUHN8	121911077	M5SZJ6VHUHN8	US	40.669895	-73.974354	5998304	NEW YORK U SCH OF MED		Elite	female	95	NEW YORK	NY	SCHOOLS OF MEDICINE	10016	UNITED STATES	N	9/8/22	8/31/23	113	Non-SBIR/STTR	2022	248389	NIEHS	147467	coastal
NINDS	10706361	9/21/22	PA-20-188	4R00NS123242-02	4	R00	NS	123242	2		GUBITZ, AMELIE	7/15/21	7/31/25	NST-2 Study Section [NST-2]	12500184	7	NEUROSCIENCES	1910777	FTMTDMBR29C7	1910777	FTMTDMBR29C7	US	39.325256	-76.605131	4134401	JOHNS HOPKINS U		Elite	female	99	BALTIMORE	MD	SCHOOLS OF MEDICINE	212182680	UNITED STATES	N	9/21/22	7/31/23	853	Non-SBIR/STTR	2022	249000	NIA	152061	#N/A
NIGMS	9853072	3/1/19 0:00	PA-16-077	4R00GM121856-03	4	R00	GM	121856	3		BARSKI, OLEG	5/15/17 0:00	2/28/22 0:00	NSS	11488702	52	Unavailable	78367362	WAADZMTALN67	78367362	WAADZMTALN67	US	32.887458	-117.182927	10031214	SCINTILLON INST FOR PHOTOBIOLOGY		Non-Elite	male	98	SAN DIEGO	CA	Research Institutes	921212217	UNITED STATES	N	3/1/19 0:00	2/29/20 0:00	859	Non-SBIR/STTR	2019	248999	NIGMS	151273	coastal
NIEHS	8697204	8/26/13 0:00	PA-11-197	4R00ES021467-03	4	R00	ES	21467	3		SCHUG, THADDEUS	9/1/13 0:00	8/31/16 0:00	NSS	10404032	3	Unavailable	806345617	ED44Y3W6P7B9	806345617	ED44Y3W6P7B9	US	32.232844	-110.959467	490201	U OF ARIZONA		Non-Elite	unknown		TUCSON	AZ	Domestic Higher Education	857210158	UNITED STATES	N	9/1/13 0:00	8/31/14 0:00	113	Non-SBIR/STTR	2013	248999	NIEHS	173821	coastal
NINDS	9608838	12/15/17 0:00	PA-15-083	4R00NS096108-03	4	R00	NS	96108	3		GNADT, JAMES W	1/1/18 0:00	12/31/20 0:00	NSS	9864885	8	PHYSIOLOGY	193247145	R28EKN92ZTZ9	193247145	R28EKN92ZTZ9	US	42.653979	-84.492032	5245901	MICHIGAN STATE U		Non-Elite	male	93	EAST LANSING	MI	SCHOOLS OF OSTEOPATHIC MEDICINE	488242600	UNITED STATES	N	1/1/18 0:00	12/31/18 0:00	853	Non-SBIR/STTR	2018	249000	NINDS	221552	coastal
NCI	8525730	9/20/12 0:00	PA-11-197	4R00CA151412-03	4	R00	CA	151412	3		HOWCROFT, THOMAS K	8/19/10 0:00	8/31/15 0:00	NSS	10363044	7	Unavailable	48682157	SZ32VTCXM799	48682157	SZ32VTCXM799	US	47.66243	-122.282291	1531401	SEATTLE CHILDRENS HOSP		Non-Elite	female	92	SEATTLE	WA	Independent Hospitals	981053901	UNITED STATES	N	9/20/12 0:00	8/31/13 0:00	396	Non-SBIR/STTR	2012	248994	NCI	133377	#N/A
NIGMS	8446750	4/12/12 0:00		4R00GM097096-02	4	R00	GM	97096	2		GERRATANA, BARBARA	4/1/11 0:00	3/31/15 0:00	NSS	9247085	3	CHEMISTRY	43207562	FL6GV84CKN57	43207562	FL6GV84CKN57	US	41.310925	-72.926428	9420201	YALE U		Elite	male	99	NEW HAVEN	CT	SCHOOLS OF ARTS AND SCIENCES	65208327	UNITED STATES	N	4/13/12 0:00	3/31/13 0:00	859	Non-SBIR/STTR	2012	249000	NIGMS	150114	coastal
NIAAA	9508042	8/30/17 0:00	PA-11-197	4R00AA023266-03	4	R00	AA	23266	3		WANG, JOE	6/1/17 0:00	5/31/20 0:00	NSS	10534747	11	OTHER BASIC SCIENCES	135781701	M5QFLTCTSQN6	135781701	M5QFLTCTSQN6	US	41.502657	-81.622127	10000858	CLEVELAND CLINIC LERNER COM CWRU		Non-Elite	female	97	CLEVELAND	OH	SCHOOLS OF MEDICINE	441950001	UNITED STATES	N	9/1/17 0:00	5/31/18 0:00	273	Non-SBIR/STTR	2017	249000	NIAAA	155625	#N/A
NIDDK	10447851	##########	PA-18-398	4R00DK122019-03	4	R00	DK	122019	3		LAUGHLIN, MAREN R	9/1/21 0:00	##########	NSS	14626371	1	ANATOMY/CELL BIOLOGY	68552207	L6NFUM28LQM5	68552207	L6NFUM28LQM5	US	38.664368	-90.323797	9083901	WASHINGTON U		Non-Elite	female	89	SAINT LOUIS	MO	SCHOOLS OF MEDICINE	631304862	UNITED STATES	N	9/1/21 0:00	##########	847	Non-SBIR/STTR	2021	249000	NIDDK	158095	coastal
FIC	7672875	11/3/08 0:00	PA-06-133	4R00TW008042-02	4	R00	TW	8042	2		SINA, BARBARA J	9/30/07 0:00	10/30/11 0:00	NSS	7539823	5	MICROBIOLOGY/IMMUN/VIROLOGY	65391526	JJG6HU8PA4S5	65391526	JJG6HU8PA4S5	US	38.050527	-78.500531	1526402	U OF VIRGINIA		Non-Elite	female	93	CHARLOTTESVILLE	VA	SCHOOLS OF MEDICINE	229044195	UNITED STATES	N	11/1/08 0:00	10/30/09 0:00	989	Non-SBIR/STTR	2009	225000	FIC		#N/A
NIGMS	9729937	7/19/18 0:00	PA-15-083	4R00GM118826-03	4	R00	GM	118826	3		KEANE-MYERS, ANDREA	7/1/16 0:00	7/31/21 0:00	NSS	11324296	11	BIOLOGY	77758407	HJMKEF7EJW69	77758407	HJMKEF7EJW69	US	41.502739	-81.607334	218601	CASE WESTERN RESERVE U		Non-Elite	female	98	CLEVELAND	OH	SCHOOLS OF ARTS AND SCIENCES	441061712	UNITED STATES	N	8/1/18 0:00	7/31/19 0:00	859	Non-SBIR/STTR	2018	249000	NIGMS	155625	coastal
NHLBI	9071987	6/18/15 0:00	PA-11-197	4R00HL114648-03	4	R00	HL	114648	3		CARLSON, DREW E	7/1/15 0:00	6/30/18 0:00	NSS	10345284	12	PHARMACOLOGY	966668691	N4WWJC8T2593	809593387; 966668691	JJJNQAJY5RN6; N4WWJC8T2593	US	33.470962	-81.991405	676605	AUGUSTA U		Non-Elite	male	98	AUGUSTA	GA	SCHOOLS OF MEDICINE	309120004	UNITED STATES	N	7/1/15 0:00	6/30/16 0:00	837	Non-SBIR/STTR	2015	249000	NHLBI	182240	coastal
NINDS	7675579	9/5/08 0:00	PA-07-297	4R00NS057906-03	4	R00	NS	57906	3		MAMOUNAS, LAURA	12/1/06 0:00	8/31/11 0:00	NSS	8630248	18	PHYSICS	9214214	HJD6G4D6TJY5	9214214	HJD6G4D6TJY5	US	37.426852	-122.17047	8046501	STANFORD U		Elite	female	75	STANFORD	CA	SCHOOLS OF ARTS AND SCIENCES	943052004	UNITED STATES	N	9/1/08 0:00	8/31/09 0:00	853	Non-SBIR/STTR	2008	251148	NINDS		#N/A
NHLBI	10656990	7/27/22	PA-20-188	4R00HL153683-03	4	R00	HL	153683	3		TJURMINA, OLGA A	9/1/22	8/31/25	ZHL1-SRC(99)	16169060	7	Unavailable	76593722	Z1L9F1MM1RY3	76593722	Z1L9F1MM1RY3	US	42.337481	-71.104964	1504801	BOSTON CHILDRENS HOSP		Elite	female	61	BOSTON	MA	Independent Hospitals	21155724	UNITED STATES	N	9/1/22	8/31/23	837	Non-SBIR/STTR	2022	249000	NHLBI	184181	#N/A
NIMH	10595725	4/14/22	PAR-18-814	4R00MH122228-03	4	R00	MH	122228	3		VICENTIC, ALEKSANDRA	5/1/22	4/30/25	NSS	11628501	7	NEUROSCIENCES	63690705	YND4PLMC9AN7	63690705	YND4PLMC9AN7	US	33.50591	-86.799772	1288803	U OF ALABAMA AT BIRMINGHAM		Non-Elite	female	100	BIRMINGHAM	AL	SCHOOLS OF MEDICINE	352940001	UNITED STATES	N	5/1/22	4/30/23	242	Non-SBIR/STTR	2022	249000	NIMH	167677	#N/A
NHLBI	8166292	3/29/11 0:00	PA-06-133	4R00HL092232-03	4	R00	HL	92232	3		ROLTSCH, MARK	12/15/08 0:00	3/31/14 0:00	NSS	9042257	9	BIOLOGY	800771594	ZUFBNVZ587D4	800771594	ZUFBNVZ587D4	US	29.703025	-95.403303	578417	U OF TEXAS HLTH SCI CTR HOUSTON		Non-Elite	male	93	HOUSTON	TX	SCHOOLS OF MEDICINE	770305400	UNITED STATES	N	4/1/11 0:00	3/31/12 0:00	837	Non-SBIR/STTR	2011	249000	NHLBI		coastal
NIA	8183447	4/8/11 0:00		4R00AG032308-03	4	R00	AG	32308	3		GUO, MAX	4/15/11 0:00	3/31/14 0:00	NSS	6651507	37	NONE	72933393	G88KLJR3KYT5	72933393	G88KLJR3KYT5	US	34.017282	-118.281254	7636101	U OF SOUTHERN CALIFORNIA		Non-Elite	male	99	Los Angeles	CA	OTHER SPECIALIZED SCHOOLS	900894304	UNITED STATES	N	4/15/11 0:00	3/31/12 0:00	866	Non-SBIR/STTR	2011	249000	NIA		#N/A
NIAAA	8810270	4/14/14 0:00	PA-11-197	4R00AA021760-02	4	R00	AA	21760	2		LIU, QI-YING	4/15/14 0:00	3/31/17 0:00	NSS	8685783	3	NONE	96997515	NPSNT86JKN51	96997515	NPSNT86JKN51	US	45.49882	-122.685647	6297007	OREGON HEALTH & SCI U		Non-Elite	male	100	PORTLAND	OR	PRIMATE CENTERS	972393098	UNITED STATES	N	4/15/14 0:00	3/31/15 0:00	273	Non-SBIR/STTR	2014	248992	NIAAA	174338	coastal
NIDA	10175277	9/3/20 0:00	PA-16-193	4R00DA046311-03	4	R00	DA	46311	3		JENKINS, RICHARD A	5/1/18 0:00	7/31/23 0:00	NSS	11368028	7	INTERNAL MEDICINE/MEDICINE	150805653	RD7MXJV7DKT9	150805653	RD7MXJV7DKT9	US	28.601027	-81.197266	513805	U OF CENTRAL FLORIDA	1099	Non-Elite	female	98	ORLANDO	FL	SCHOOLS OF MEDICINE	328263231	UNITED STATES	N	8/1/20 0:00	7/31/21 0:00	279	Non-SBIR/STTR	2020	248940	NIDA	167074	coastal
NHLBI	8527234	8/31/12 0:00	PA-11-197	4R00HL103973-03	4	R00	HL	103973	3		COLOMBINI-HATCH, SANDRA	8/9/10 0:00	5/31/15 0:00	NSS	10236857	7	INTERNAL MEDICINE/MEDICINE	1910777	FTMTDMBR29C7	1910777	FTMTDMBR29C7	US	39.325256	-76.605131	4134401	JOHNS HOPKINS U		Elite	male	99	BALTIMORE	MD	SCHOOLS OF MEDICINE	212182680	UNITED STATES	N	8/31/12 0:00	5/31/13 0:00	838	Non-SBIR/STTR	2012	249000	NHLBI	153704	#N/A
NIAID	8819199	5/9/14 0:00	PA-11-197	4R00AI097286-02	4	R00	AI	97286	2		MOAYERI, MAHTAB	5/10/12 0:00	4/30/16 0:00	NSS	10826866	18	MICROBIOLOGY/IMMUN/VIROLOGY	4514360	MKAGLD59JRL1	4514360	MKAGLD59JRL1	US	40.440909	-79.959125	2059802	U OF PITTSBURGH AT PITTSBURGH		Elite	female	97	PITTSBURGH	PA	SCHOOLS OF MEDICINE	152133320	UNITED STATES	N	5/9/14 0:00	4/30/15 0:00	855	Non-SBIR/STTR	2014	249000	NIAID	163350	coastal
NIAID	8205681	2/9/11 0:00		4R00AI083087-02	4	R00	AI	83087	2		SALZWEDEL, KARL D	7/1/09 0:00	1/31/13 0:00	NSS	8954843	30	MICROBIOLOGY/IMMUN/VIROLOGY	800771545	YZJ6DKPM4W63	800771545	YZJ6DKPM4W63	US	32.811963	-96.837534	578404	UT SOUTHWESTERN MED CTR		Non-Elite	male	99	DALLAS	TX	SCHOOLS OF MEDICINE	753909105	UNITED STATES	N	2/10/11 0:00	1/31/12 0:00	855	Non-SBIR/STTR	2011	249000	NIAID		coastal
NCI	10149485	9/10/20 0:00	PA-16-193	4R00CA218686-03	4	R00	CA	218686	3		MCCARTHY, SUSAN A	9/10/20 0:00	8/31/23 0:00	NSS	12261871	14	Unavailable	139301956	DVHKP4N619V9	139301956	DVHKP4N619V9	US	28.062583	-82.419596	3736101	H LEE MOFFITT CANCER CTR & RES INST		Non-Elite	male	59	TAMPA	FL	Research Institutes	336129497	UNITED STATES	N	9/10/20 0:00	8/31/21 0:00	396	Non-SBIR/STTR	2020	249000	NCI	151184	#N/A
NIMH	8848172	7/24/14 0:00	PA-11-197	4R00MH096746-03	4	R00	MH	96746	3		SIMMONS, JANINE M	3/1/12 0:00	6/30/17 0:00	NSS	10224602	10	PHARMACOLOGY	69501252	V913TCT2SFZ9	69501252	V913TCT2SFZ9	US	42.302294	-87.861378	1402201	ROSALIND FRANKLIN U OF MED & SCI		Non-Elite	female	98	NORTH CHICAGO	IL	SCHOOLS OF MEDICINE	600643037	UNITED STATES	N	7/24/14 0:00	6/30/15 0:00	242	Non-SBIR/STTR	2014	248999	NIMH	176347	coastal
NIGMS	10653329	8/1/22	PA-20-188	4R00GM140211-02	4	R00	GM	140211	2		SHEWMAKER, FRANK PAUL	9/1/22	8/31/25	ZGM1-SRC(99)	12221732	2	BIOMEDICAL ENGINEERING	50299031	K51LECU1G8N3	50299031	K51LECU1G8N3	US	29.717236	-95.402761	9291001	RICE U	542	Non-Elite	male	89	HOUSTON	TX	BIOMED ENGR/COL ENGR/ENGR STA	770051827	UNITED STATES	N	9/1/22	8/31/23	859	Non-SBIR/STTR	2022	249000	NIGMS	174731	coastal
NCI	7917087	8/24/09 0:00	PA-06-133	4R00CA127134-04	4	R00	CA	127134	4		SPALHOLZ, BARBARA A	9/1/09 0:00	8/31/12 0:00	ZCA1-RTRB-2(J1)	8652093	3	MICROBIOLOGY/IMMUN/VIROLOGY	96997515	NPSNT86JKN51	96997515	NPSNT86JKN51	US	45.49882	-122.685647	6297007	OREGON HEALTH & SCI U		Non-Elite	male	67	PORTLAND	OR	SCHOOLS OF MEDICINE	972393098	UNITED STATES	N	9/1/09 0:00	8/31/10 0:00	398	Non-SBIR/STTR	2009	249000	NCI		#N/A
NHLBI	9967305	8/23/19 0:00	PA-16-193	4R00HL138278-03	4	R00	HL	138278	3		KALANTARI, ROYA	9/1/19 0:00	7/31/22 0:00	NSS	12268237	3	INTERNAL MEDICINE/MEDICINE	806345617	ED44Y3W6P7B9	806345617	ED44Y3W6P7B9	US	32.232844	-110.959467	490201	U OF ARIZONA		Non-Elite	male	77	TUCSON	AZ	SCHOOLS OF MEDICINE	857210158	UNITED STATES	N	9/1/19 0:00	8/31/20 0:00	837	Non-SBIR/STTR	2019	249000	NHLBI	162215	#N/A
NICHD	9144551	1/26/16 0:00	PA-11-197	4R00HD079561-03	4	R00	HD	79561	3		RAITEN, DANIEL J	1/1/16 0:00	12/31/18 0:00	NSS	9840603	4	BIOLOGY	53599908	MZ4DYXE1SL98	53599908	MZ4DYXE1SL98	US	44.565718	-123.280906	6297004	OREGON STATE U	915	Non-Elite	male	99	CORVALLIS	OR	SCHOOLS OF PUBLIC HEALTH	973318555	UNITED STATES	N	1/1/16 0:00	12/31/16 0:00	865	Non-SBIR/STTR	2016	249000	NICHD	174373	coastal
NIDDK	10058881	2/10/20 0:00	PA-16-193	4R00DK118253-03	4	R00	DK	118253	3		HATTANGADI, SHILPA MANOHAR	7/1/18 0:00	1/31/23 0:00	NSS	12478305	4	Unavailable	105300446	MLQFL4JSSAA9	105300446	MLQFL4JSSAA9	US	37.549807	-77.452775	353201	VIRGINIA COMMONWEALTH U		Non-Elite	male	99	RICHMOND	VA	Domestic Higher Education	232980568	UNITED STATES	N	2/10/20 0:00	1/31/21 0:00	847	Non-SBIR/STTR	2020	249000	NIDDK	185488	coastal
NCI	8733784	9/16/13 0:00	PA-10-063	4R00CA149178-03	4	R00	CA	149178	3		SPALHOLZ, BARBARA A	9/16/13 0:00	8/31/16 0:00	NSS	9855998	7	PATHOLOGY	188435911	Z9CRZKD42ZT1	188435911	Z9CRZKD42ZT1	US	39.292248	-76.625629	820104	U OF MARYLAND BALTIMORE		Non-Elite	male	75	BALTIMORE	MD	SCHOOLS OF MEDICINE	212011508	UNITED STATES	N	9/16/13 0:00	8/31/14 0:00	396	Non-SBIR/STTR	2013	234060	NCI	152482	coastal
NIA	8607245	3/5/13 0:00	PA-11-197	4R00AG037646-03	4	R00	AG	37646	3		GUO, MAX	3/15/13 0:00	2/29/16 0:00	NSS	10236393	9	GENETICS	51113330	FXKMA43NTV21	51113330	FXKMA43NTV21	US	29.70926	-95.400851	481201	BAYLOR COLL OF MED		Non-Elite	female	61	HOUSTON	TX	SCHOOLS OF MEDICINE	770303411	UNITED STATES	N	3/15/13 0:00	2/28/14 0:00	866	Non-SBIR/STTR	2013	249000	NIA	159106	coastal
NCI	9189187	4/1/16 0:00	PA-14-042	4R00CA197649-02	4	R00	CA	197649	2		KONDAPAKA, SUDHIR B	4/1/16 0:00	3/31/19 0:00	NSS	10884699	10	BIOMEDICAL ENGINEERING	49179401	F4N1QNPB95M4	49179401	F4N1QNPB95M4	US	40.81207	-73.954377	1833202	COLUMBIA U NEW YORK MORNINGSIDE		Elite	male	67	NEW YORK	NY	BIOMED ENGR/COL ENGR/ENGR STA	100276900	UNITED STATES	N	4/1/16 0:00	3/31/17 0:00	395	Non-SBIR/STTR	2016	249000	NCI	166888	coastal
NINDS	10542294	2/3/22	PA-19-130	4R00NS116129-03	4	R00	NS	116129	3		DAVID, KAREN KATE	4/1/20	3/31/25	NST-2 Study Section [NST-2]	14352167	11	ENGINEERING (ALL TYPES)	77817450	EADLFP7Z72E5	77817450	EADLFP7Z72E5	US	38.834433	-77.310955	819801	GEORGE MASON U	1310	Non-Elite	male	99	FAIRFAX	VA	BIOMED ENGR/COL ENGR/ENGR STA	220304422	UNITED STATES	N	2/15/22	3/31/23	853	Non-SBIR/STTR	2022	336305	NINDS	243776	coastal
NIAMS	7916014	9/22/09 0:00		4R00AR054673-02	4	R00	AR	54673	2		WANG, FEI	9/22/09 0:00	8/31/12 0:00	NSS	8128748	1	PHARMACOLOGY	1785542	E3FDXZ6TBHW3	1785542	E3FDXZ6TBHW3	US	41.826136	-71.404513	1003201	BROWN U		Elite	male	99	PROVIDENCE	RI	SCHOOLS OF MEDICINE	29034202	UNITED STATES	N	9/22/09 0:00	8/31/10 0:00	846	Non-SBIR/STTR	2009	249000	NIAMS		coastal
NCI	10547987	6/14/22	RFA-CA-19-029	4R00CA246063-03	4	R00	CA	246063	3		DAEE, DANIELLE L	2/1/20	6/30/25	ZCA1-TCRB-T(O2)	14153859	7	Unavailable	806433145	TJFZLPP6NYL6	806433145	TJFZLPP6NYL6	US			10068583	FRED HUTCHINSON CANCER RES CTR		Elite	female	97	Seattle	WA	Other Domestic Non-Profits	98109	UNITED STATES	N	7/1/22	6/30/23	398	Non-SBIR/STTR	2022	249000	NCI	141477	#N/A
NEI	10065922	2/18/20 0:00	PA-16-193	4R00EY028223-03	4	R00	EY	28223	3		GREENWELL, THOMAS	11/1/19 0:00	1/31/23 0:00	NSS	14677139	7	OPHTHALMOLOGY	603007902	SHHBRBAPSM35	603007902; 625168166	DKNHLK3NBPH7; DL9MTNNKWYR9; GY8GKRUWM7D5; HA48EWMJFV47; HCNBFNDANNV5; HCRDU7BNPZ13; HCWTYJ7KQ4U6; HEBLAL94JHP7; NKCRSKVJBXE3; SHHBRBAPSM35; TA1NYNZ27LQ7; WJJRCLJ936C8; X51WYC1QEPD7; XNBJV454V2W1; YCJNP5NJYCY1; YW8WNKKANDR9	US	39.779213	-86.175288	577806	INDIANA U PURDUE U AT INDIANAPOLIS		Non-Elite	male	100	INDIANAPOLIS	IN	SCHOOLS OF MEDICINE	462022915	UNITED STATES	N	2/1/20 0:00	1/31/21 0:00	867	Non-SBIR/STTR	2020	249000	NEI	167432	#N/A
NIDA	7920504	9/15/09 0:00	PA-07-297	4R00DA024558-03	4	R00	DA	24558	3		POLLOCK, JONATHAN D	9/15/09 0:00	8/31/12 0:00	NSS	8680831	5	INTERNAL MEDICINE/MEDICINE	41438185	DLTJBDQBGBC9	41438185	DLTJBDQBGBC9	US	36.166904	-86.806149	5050201	MEHARRY MED COLL		Non-Elite	male	100	NASHVILLE	TN	SCHOOLS OF MEDICINE	372083501	UNITED STATES	N	9/15/09 0:00	8/31/10 0:00	279	Non-SBIR/STTR	2009	249000	NIDA		#N/A
NEI	10592679	8/19/22	PA-16-193	4R00EY029010-03	4	R00	EY	29010	3		NEUHOLD, LISA	9/30/18	6/30/25	NSS	12238247	5	OPHTHALMOLOGY	66469933	S352L5PJLMP8	66469933	S352L5PJLMP8	US	33.791247	-84.3249	2384501	EMORY U		Non-Elite	male	100	ATLANTA	GA	SCHOOLS OF MEDICINE	303221007	UNITED STATES	N	9/1/22	6/30/23	867	Non-SBIR/STTR	2022	249000	NEI	159105	#N/A
NHLBI	8097023	8/26/11 0:00	PA-10-063	4R00HL089710-03	4	R00	HL	89710	3		COLOMBINI-HATCH, SANDRA	9/1/11 0:00	1/1/12 0:00	NSS	8786834	7	Unavailable	30811269	QN6MS4VN7BD1	30811269	QN6MS4VN7BD1	US	42.336107	-71.107481	1080401	BRIGHAM AND WOMENS HOSP		Elite	unknown		BOSTON	MA	Independent Hospitals	21156110	UNITED STATES	N	9/1/11 0:00	1/1/12 0:00	837	Non-SBIR/STTR	2011	53788	OD		#N/A
NIDCD	8413909	6/14/12 0:00		4R00DC010439-03	4	R00	DC	10439	3		SKLARE, DAN	6/15/12 0:00	5/31/15 0:00	NSS	8375607	3	NONE	96997515	NPSNT86JKN51	96997515	NPSNT86JKN51	US	45.49882	-122.685647	6297007	OREGON HEALTH & SCI U		Non-Elite	male	99	PORTLAND	OR	SCHOOLS OF MEDICINE	972393098	UNITED STATES	N	6/15/12 0:00	5/31/13 0:00	173	Non-SBIR/STTR	2012	248921	NIDCD	168650	coastal
NCCIH	8141890	9/23/10 0:00	PA-07-297	4R00AT004983-02	4	R00	AT	4983	2		KHALSA, PARTAP SINGH	9/30/10 0:00	7/31/13 0:00	ZAT1-LD(30)	9358326	1	ENGINEERING (ALL TYPES)	7431760	WCUGNQQ8DZU1	7431760	WCUGNQQ8DZU1	US	39.676639	-104.959481	2091901	U OF DENVER (COLORADO SEMINARY)		Non-Elite	male	99	DENVER	CO	BIOMED ENGR/COL ENGR/ENGR STA	802104711	UNITED STATES	N	9/30/10 0:00	7/31/11 0:00	213	Non-SBIR/STTR	2010	226048	NCCIH		#N/A
NHLBI	8119214	9/6/10 0:00		4R00HL094697-02	4	R00	HL	94697	2		ROTHGEB, ANN E	9/10/10 0:00	7/31/13 0:00	NSS	9337694	5	PHYSIOLOGY	102005451	X5S7PNXMJMC7	102005451	X5S7PNXMJMC7	US	33.746607	-84.414781	1726701	MOREHOUSE SCH OF MED		Non-Elite	male	99	ATLANTA	GA	SCHOOLS OF MEDICINE	303101495	UNITED STATES	N	9/10/10 0:00	7/31/11 0:00	837	Non-SBIR/STTR	2010	249000	NHLBI		coastal
NHLBI	9091991	8/17/15 0:00	PA-11-197	4R00HL119353-03	4	R00	HL	119353	3		CARLSON, DREW E	9/1/15 0:00	8/31/18 0:00	NSS	9425513	7	PATHOLOGY	605799469	HD1WMN6945W6	605799469	HD1WMN6945W6	US	47.660307	-122.315168	9087701	U OF WASHINGTON		Elite	female	98	SEATTLE	WA	SCHOOLS OF MEDICINE	981959472	UNITED STATES	N	9/1/15 0:00	8/31/16 0:00	837	Non-SBIR/STTR	2015	248999	NHLBI	143103	coastal
NIA	9537719	9/7/17 0:00	PA-14-042	4R00AG050749-03	4	R00	AG	50749	3		VELAZQUEZ, JOSE M	8/1/15 0:00	5/31/20 0:00	NSS	11210074	7	BIOLOGY	1425594	E2NYLCDML6V1	1425594	E2NYLCDML6V1	US	42.359128	-71.093339	4911501	MASSACHUSETTS INST OF TECHNOLOGY	1037	Elite	male	99	CAMBRIDGE	MA	SCHOOLS OF ARTS AND SCIENCES	21421029	UNITED STATES	N	9/15/17 0:00	5/31/18 0:00	866	Non-SBIR/STTR	2017	249000	NIA	204256	#N/A
NIGMS	10105429	5/29/20 0:00	PA-16-193	4R00GM129460-03	4	R00	GM	129460	3		ASLAN, KADIR	9/1/18 0:00	5/31/23 0:00	NSS	12610284	5	CHEMISTRY	66469933	S352L5PJLMP8	66469933	S352L5PJLMP8	US	33.791247	-84.3249	2384501	EMORY U		Non-Elite	female	99	ATLANTA	GA	SCHOOLS OF ARTS AND SCIENCES	303221007	UNITED STATES	N	6/1/20 0:00	5/31/21 0:00	859	Non-SBIR/STTR	2020	249000	NIGMS	186399	coastal
NIGMS	8441043	4/16/12 0:00	PA-11-197	4R00GM094293-03	4	R00	GM	94293	3		FLICKER, PAULA F	8/20/10 0:00	3/31/15 0:00	NSS	8586808	3	BIOCHEMISTRY	2604817	XF3XM9642N96	2604817	XF3XM9642N96	US	39.954073	-75.186541	2205901	DREXEL U		Non-Elite	female	94	PHILADELPHIA	PA	SCHOOLS OF MEDICINE	191043735	UNITED STATES	N	4/16/12 0:00	3/31/13 0:00	859	Non-SBIR/STTR	2012	249000	NIGMS	161165	#N/A
NIGMS	10373164	##########	PA-18-398	4R00GM129454-02	4	R00	GM	129454	2		BARSKI, OLEG	##########	##########	NSS	8792285	22	PHARMACOLOGY	90189965	NQMVAAQUFU53	90189965	NQMVAAQUFU53	US	42.09521	-75.964561	5992621	STATE U OF NYBINGHAMTON		Non-Elite	male	99	BINGHAMTON	NY	SCHOOLS OF PHARMACY	139026000	UNITED STATES	N	7/15/21 0:00	##########	859	Non-SBIR/STTR	2021	248999	NIGMS	169490	#N/A
NCI	9692843	5/16/18 0:00	PA-16-077	4R00CA212621-03	4	R00	CA	212621	3		MCCARTHY, SUSAN A	6/1/18 0:00	3/31/21 0:00	NSS	14377696	12	BIOCHEMISTRY	121911077	M5SZJ6VHUHN8	121911077	M5SZJ6VHUHN8	US	40.669895	-73.974354	5998304	NEW YORK U SCH OF MED		Elite	female	98	NEW YORK	NY	SCHOOLS OF MEDICINE	10016	UNITED STATES	N	6/1/18 0:00	5/31/19 0:00	396	Non-SBIR/STTR	2018	249000	NCI	153951	coastal
NIDA	8880711	8/21/14 0:00	PA-11-197	4R00DA034681-02	4	R00	DA	34681	2		SATTERLEE, JOHN S	7/1/14 0:00	6/30/17 0:00	NSS	3118660	7	NEUROSCIENCES	63690705	YND4PLMC9AN7	63690705	YND4PLMC9AN7	US	33.50591	-86.799772	1288803	U OF ALABAMA AT BIRMINGHAM		Non-Elite	male	99	BIRMINGHAM	AL	SCHOOLS OF MEDICINE	352940001	UNITED STATES	N	7/1/14 0:00	6/30/15 0:00	279	Non-SBIR/STTR	2014	249000	NIDA	169388	coastal
NHLBI	9305414	8/25/16 0:00	PA-14-042	4R00HL125805-03	4	R00	HL	125805	3		GALIS, ZORINA S	12/1/14 0:00	8/31/19 0:00	NSS	9807336	3	PHYSIOLOGY	969663814	NNFQH1JAPEP3	969663814	NNFQH1JAPEP3	US	29.643443	-82.349637	513806	U OF FLORIDA		Non-Elite	female	75	GAINESVILLE	FL	SCHOOLS OF MEDICINE	326115500	UNITED STATES	N	9/1/16 0:00	8/31/17 0:00	837	Non-SBIR/STTR	2016	248456	NHLBI	165637	coastal
NIMH	10441036	##########	PA-18-398	4R00MH118359-03	4	R00	MH	118359	3		FERRANTE, MICHELE	##########	##########	ZMH1-ERB-M(03)	14532581	2	PSYCHIATRY	9095365	LL8GLEVH6MG3	9095365	LL8GLEVH6MG3	US	40.764542	-111.85032	514002	U OF UTAH		Non-Elite	female	94	SALT LAKE CITY	UT	SCHOOLS OF MEDICINE	841128906	UNITED STATES	N	9/1/21 0:00	##########	242	Non-SBIR/STTR	2021	249000	NIMH	163279	coastal
NIDDK	8992028	4/15/15 0:00	PA-11-197	4R00DK094871-03	4	R00	DK	94871	3		YANOVSKI, SUSAN Z	5/1/15 0:00	4/30/18 0:00	NSS	10958726	3	Unavailable	10139210	KRKPFMRJ5H19	10139210	KRKPFMRJ5H19	US	41.302033	-72.932565	4116401	JOHN B PIERCE lab INC		Non-Elite	male	67	NEW HAVEN	CT	Research Institutes	65191403	UNITED STATES	N	5/1/15 0:00	4/30/16 0:00	847	Non-SBIR/STTR	2015	249000	NIDDK	146428	#N/A
NIMH	8794515	4/18/14 0:00	PA-11-197	4R00MH095825-03	4	R00	MH	95825	3		PANCHISION, DAVID M	4/20/14 0:00	12/31/16 0:00	NSS	9710009	12	NEUROLOGY	60217502	YNT8TCJH8FQ8	60217502	YNT8TCJH8FQ8	US	40.7607	-73.9603	1514803	WEILL MED COLL OF CORNELL U		Elite	male	99	NEW YORK	NY	SCHOOLS OF MEDICINE	100654805	UNITED STATES	N	4/20/14 0:00	12/31/14 0:00	242	Non-SBIR/STTR	2014	248999	NIMH	146902	coastal
NIEHS	10213962	9/1/20 0:00	PA-18-398	4R00ES029986-03	4	R00	ES	29986	3		HOLLANDER, JONATHAN	9/1/20 0:00	7/31/23 0:00	NSS	12236081	7	NEUROLOGY	63690705	YND4PLMC9AN7	63690705	YND4PLMC9AN7	US	33.50591	-86.799772	1288803	U OF ALABAMA AT BIRMINGHAM		Non-Elite	female	95	BIRMINGHAM	AL	SCHOOLS OF MEDICINE	352940001	UNITED STATES	N	9/1/20 0:00	7/31/21 0:00	113	Non-SBIR/STTR	2020	249000	NIEHS	167677	#N/A
NIMH	9794968	7/15/19 0:00	PA-16-193	4R00MH110596-03	4	R00	MH	110596	3		GILOTTY, LISA	8/21/17 0:00	7/31/22 0:00	ZMH1-ERB-X(04)	11955507	2	PEDIATRICS	161202122	LCLSJAGTNZQ7	161202122	LCLSJAGTNZQ7	US	43.068519	-89.400858	578503	U OF WISCONSIN MADISON		Elite	male	99	MADISON	WI	SCHOOLS OF MEDICINE	537151218	UNITED STATES	N	8/1/19 0:00	7/31/20 0:00	242	Non-SBIR/STTR	2019	249000	NIMH	160645	#N/A
NHLBI	7506387	12/27/07 0:00	PA-07-297	4R00HL088317-03	4	R00	HL	88317	3		SCOTT, JANE	2/1/08 0:00	1/31/11 0:00	NSS	8670141	4	INTERNAL MEDICINE/MEDICINE	608195277	D3LHU66KBLD5	608195277	D3LHU66KBLD5	US	35.9316	-79.057377	578206	U OF NORTH CAROLINA CHAPEL HILL		Elite	male	100	CHAPEL HILL	NC	SCHOOLS OF MEDICINE	275995023	UNITED STATES	N	2/1/08 0:00	1/31/09 0:00	837	Non-SBIR/STTR	2008	249000	NHLBI		coastal
NIAID	7531554	12/17/07 0:00	PA-07-297	4R00AI073682-02	4	R00	AI	73682	2		PROGRAIS, LAWRENCE J	4/1/07 0:00	12/31/09 0:00	NSS	8651182	3	VETERINARY SCIENCES	42250712	GM1XX56LEP58	42250712	GM1XX56LEP58	US	39.953462	-75.193983	6463801	U OF PENNSYLVANIA		Elite	female	97	PHILADELPHIA	PA	SCHOOLS OF VETERINARY MEDICINE	191046205	UNITED STATES	N	1/1/08 0:00	12/31/08 0:00	855	Non-SBIR/STTR	2008	249000	NIAID		coastal
NIDDK	9394276	3/8/17 0:00	PA-14-042	4R00DK106655-03	4	R00	DK	106655	3		MARIC-BILKAN, CHRISTINE	3/8/17 0:00	2/28/20 0:00	NSS	10841317	7	PHARMACOLOGY	5436803	KG76WYENL5K1	5436803	KG76WYENL5K1	US	42.050479	-87.680046	6144650	NORTHWESTERN U		Elite	male	99	CHICAGO	IL	SCHOOLS OF MEDICINE	606114579	UNITED STATES	N	3/8/17 0:00	2/28/18 0:00	847	Non-SBIR/STTR	2017	248683	NIDDK	163271	coastal
NIDCR	10607169	7/19/22	PAR-19-144	4R00DE029756-03	4	R00	DE	29756	3		BROWN, ANISSA F	8/1/22	7/31/25	ZDE1-SRC(99)	14077445	12	DENTISTRY	73133571	GNJ7BBP73WE9	73133571	GNJ7BBP73WE9	US	42.275494	-83.743038	1506502	U OF MICHIGAN AT ANN ARBOR		Elite	female	97	ANN ARBOR	MI	SCHOOLS OF DENTISTRY/ORAL HYGN	481091276	UNITED STATES	N	8/1/22	7/31/23	121	Non-SBIR/STTR	2022	248999	NIDCR	159615	coastal
NCI	8854285	8/15/14 0:00	PA-11-197	4R00CA172122-02	4	R00	CA	172122	2		YASSIN, RIHAB R	8/15/14 0:00	7/31/17 0:00	NSS	9486352	10	PATHOLOGY	129348186	TNKGNDAWB445	129348186	TNKGNDAWB445	US	40.264414	-76.674014	1524204	PENNSYLVANIA STATE		Non-Elite	male	99	HERSHEY	PA	SCHOOLS OF MEDICINE	170332360	UNITED STATES	N	8/15/14 0:00	7/31/15 0:00	396	Non-SBIR/STTR	2014	237659	NCI	155333	#N/A
NIEHS	9103299	8/20/15 0:00	PA-11-197	4R00ES023474-03	4	R00	ES	23474	3		DILWORTH, CAROLINE H	9/1/15 0:00	7/31/18 0:00	NSS	10743765	12	NUTRITION	41968306	NX9PXMKW5KW8	41968306	NX9PXMKW5KW8	US	40.729659	-73.997018	5998301	NEW YORK U		Elite	female	54	NEW YORK	NY	SCHOOLS OF EDUCATION	100122300	UNITED STATES	N	9/1/15 0:00	7/31/16 0:00	113	Non-SBIR/STTR	2015	249000	NIEHS	157098	coastal
NIDCD	10611096	5/20/22	PAR-19-343	4R00DC019401-03	4	R00	DC	19401	3		SULLIVAN, SUSAN L	4/5/21	3/31/25	ZGM1-TWD-8(MK)	15029232	7	BIOCHEMISTRY	47006379	JDLVAVGYJQ21	47006379	JDLVAVGYJQ21	US	42.335672	-71.104237	3212902	HARVARD MED SCH		Elite	male	67	BOSTON	MA	SCHOOLS OF MEDICINE	21201616	UNITED STATES	N	4/18/22	3/31/23	173	Non-SBIR/STTR	2022	248990	NIDCD	183869	coastal
NCI	9814814	12/21/18 0:00	PA-16-285	4R00CA207729-03	4	R00	CA	207729	3		LI, JERRY	12/1/18 0:00	11/30/21 0:00	NSS	10131112	1	BIOCHEMISTRY	183710748	NHV3GTWSALA7	183710748	NHV3GTWSALA7	US	32.786754	-79.947265	7575301	MED U OF SOUTH CAROLINA		Non-Elite	male	97	CHARLESTON	SC	SCHOOLS OF MEDICINE	294074636	UNITED STATES	N	12/1/18 0:00	11/30/19 0:00	396	Non-SBIR/STTR	2019	236625	NCI	166555	coastal
NIAMS	10665839	9/13/22	PA-20-188	4R00AR078354-02	4	R00	AR	78354	2		WASHABAUGH, CHARLES H	9/10/21	8/31/25	ZAR1-SRC(99)	11482278	3	RADIATION-DIAGNOSTIC/ONCOLOGY	53284659	R8JEVL4ULGB7	53284659	R8JEVL4ULGB7	US	39.948207	-75.157825	4050801	THOMAS JEFFERSON U		Non-Elite	female	97	PHILADELPHIA	PA	SCHOOLS OF MEDICINE	191074418	UNITED STATES	N	9/15/22	8/31/23	846	Non-SBIR/STTR	2022	249000	NIAMS	165000	coastal
NHLBI	9405941	1/22/17 0:00	PA-15-083	4R00HL130662-02	4	R00	HL	130662	2		BALIJEPALLI, RAVI C	2/1/17 0:00	1/31/20 0:00	NSS	10962421	1	ADMINISTRATION	41064767	DZ4YCZ3QSPR5	41064767	DZ4YCZ3QSPR5	US	39.129719	-84.520554	1523902	U OF CINCINNATI		Non-Elite	unknown		CINCINNATI	OH	SCHOOLS OF MEDICINE	452210001	UNITED STATES	N	2/1/17 0:00	1/31/18 0:00	837	Non-SBIR/STTR	2017	249000	NHLBI	246732	coastal
NCI	8270105	6/24/11 0:00		4R00CA126978-03	4	R00	CA	126978	3		MARTIN, DAMALI	7/14/09 0:00	12/31/11 0:00	NSS	8663402	5	INTERNAL MEDICINE/MEDICINE	965717143	GTNBNWXJ12D5	965717143	DWH7MSXKA2A8; GTNBNWXJ12D5	US	36.143381	-86.803365	8721001	VANDERBILT U		Non-Elite	female	98	Nashville	TN	SCHOOLS OF MEDICINE	372032408	UNITED STATES	N	7/1/11 0:00	12/31/11 0:00	393	Non-SBIR/STTR	2011	242479	NCI		#N/A
NINR	9329841	9/1/16 0:00	PA-11-197	4R00NR015106-03	4	R00	NR	15106	3		YOON, SUNG SUG	9/5/14 0:00	6/30/19 0:00	Nursing Science Review Committee[NRRC(59)]	9811572	18	PEDIATRICS	4514360	MKAGLD59JRL1	4514360	MKAGLD59JRL1	US	40.440909	-79.959125	2059802	U OF PITTSBURGH AT PITTSBURGH		Elite	female	97	PITTSBURGH	PA	SCHOOLS OF MEDICINE	152133320	UNITED STATES	N	9/1/16 0:00	6/30/17 0:00	361	Other Research-Related	2016	248433	NINR	161320	#N/A
NIDCR	8075185	7/29/10 0:00	PA-10-063	4R00DE018739-03	4	R00	DE	18739	3		ATKINSON, JANE C	8/1/10 0:00	7/31/13 0:00	NSS	6994180	13	PUBLIC HEALTH & PREV MEDICINE	621889815	QHF5ZZ114M72	621889815	QHF5ZZ114M72	US	40.8415	-73.9414	1833205	COLUMBIA U HEALTH SCI		Elite	male	99	NEW YORK	NY	SCHOOLS OF PUBLIC HEALTH	100323725	UNITED STATES	N	8/1/10 0:00	7/31/11 0:00	121	Non-SBIR/STTR	2010	246406	NIDCR		#N/A
NIGMS	10546571	2/18/22	PA-18-398	4R00GM130961-03	4	R00	GM	130961	3		BARSKI, OLEG	9/17/19	2/28/25	NSS	14079349	7	DERMATOLOGY	604483045	FBYMGMHW4X95	604483045	FBYMGMHW4X95	US	42.33639	-71.07097	894901	BOSTON U MED CAMPUS		Non-Elite	male	99	BOSTON	MA	SCHOOLS OF MEDICINE	21182340	UNITED STATES	N	3/1/22	2/28/23	859	Non-SBIR/STTR	2022	249000	NIGMS	150909	#N/A
NEI	9995600	9/2/19 0:00	PA-16-193	4R00EY028612-03	4	R00	EY	28612	3		FLANDERS, MARTHA C	9/30/19 0:00	6/30/22 0:00	NSS	10454439	6	PHYSIOLOGY	41096314	MW8JHK6ZYEX8	41096314	MW8JHK6ZYEX8	US	39.745098	-104.837605	1199905	U OF COLORADO DENVER		Non-Elite	male	99	Aurora	CO	SCHOOLS OF MEDICINE	800452570	UNITED STATES	N	9/30/19 0:00	6/30/20 0:00	867	Non-SBIR/STTR	2019	249000	NEI	222166	#N/A
NIAAA	7893291	9/14/09 0:00		4R00AA017870-02	4	R00	AA	17870	2		JUNG, KATHY	6/5/08 0:00	5/31/12 0:00	NSS	9043723	5	VETERINARY SCIENCES	66469933	S352L5PJLMP8	66469933	S352L5PJLMP8	US	33.791247	-84.3249	2384501	EMORY U		Non-Elite	male	99	ATLANTA	GA	PRIMATE CENTERS	303221007	UNITED STATES	N	9/15/09 0:00	5/31/10 0:00	273	Non-SBIR/STTR	2009	249000	NIAAA		#N/A
NINDS	9186571	12/18/15 0:00	PA-11-197	4R00NS083627-03	4	R00	NS	83627	3		MAMOUNAS, LAURA	1/1/16 0:00	12/31/18 0:00	NSS	10551584	3	BIOCHEMISTRY	47120084	TX2DAGQPENZ5	47120084	TX2DAGQPENZ5	US	38.543366	-121.72946	577503	U OF CALIFORNIA AT DAVIS		Non-Elite	female	99	DAVIS	CA	SCHOOLS OF MEDICINE	956186153	UNITED STATES	N	1/1/16 0:00	12/31/16 0:00	853	Non-SBIR/STTR	2016	248231	NINDS	183650	coastal
NEI	9057160	7/14/15 0:00	PA-11-197	4R00EY023612-03	4	R00	EY	23612	3		SHEN, GRACE L	8/1/15 0:00	7/31/18 0:00	NSS	10114297	10	PHYSIOLOGY	129348186	TNKGNDAWB445	129348186	TNKGNDAWB445	US	40.264414	-76.674014	1524204	PENNSYLVANIA STATE		Non-Elite	male	99	HERSHEY	PA	SCHOOLS OF MEDICINE	170332360	UNITED STATES	N	8/1/15 0:00	7/31/16 0:00	867	Non-SBIR/STTR	2015	249000	NEI	158467	#N/A
NIGMS	8878462	7/7/14 0:00	PA-11-197	4R00GM099796-03	4	R00	GM	99796	3		GERRATANA, BARBARA	3/1/13 0:00	6/30/17 0:00	NSS	7742254	4	CHEMISTRY	44387793	TP7EK8DZV6N5	44387793	TP7EK8DZV6N5	US	36.007766	-78.926475	2221101	DUKE U		Elite	female	98	DURHAM	NC	SCHOOLS OF ARTS AND SCIENCES	277054673	UNITED STATES	N	7/7/14 0:00	6/30/15 0:00	859	Non-SBIR/STTR	2014	249000	NIGMS	162043	#N/A
NIMH	8302498	8/2/11 0:00		4R00MH086756-03	4	R00	MH	86756	3		BENDER, PATRICK	7/1/11 0:00	4/30/14 0:00	NSS	9629983	3	Unavailable	110565913	C5LHMPRJ9J19	110565913	C5LHMPRJ9J19	US	40.775574	-73.703024	4155008	FEINSTEIN INST FOR MED RES		Non-Elite	female	98	MANHASSET	NY	Research Institutes	110303816	UNITED STATES	N	7/1/11 0:00	4/30/12 0:00	242	Non-SBIR/STTR	2011	249000	NIMH		coastal
NCI	10580865	4/18/22	PA-19-129	4R00CA245488-03	4	R00	CA	245488	3		GUIDA, JENNIFER LYN	9/1/19	11/30/24	Transition to Independence Study Section (I)[NCI-I]	15005863	5	Unavailable	42797571	LV8GL8MLU9A3	42797571	LV8GL8MLU9A3	US	40.883415	-74.055652	3117901	HACKENSACK U MED CTR		Non-Elite	female	99	HACKENSACK	NJ	Independent Hospitals	76011915	UNITED STATES	N	12/1/21	11/30/22	398	Non-SBIR/STTR	2022	249000	NCI	140599	coastal
NHLBI	10044072	11/28/19 0:00	PA-16-077	4R00HL135740-03	4	R00	HL	135740	3		WELNIAK, LISBETH A	8/5/17 0:00	11/30/22 0:00	NSS	11080703	11	Unavailable	77758407	HJMKEF7EJW69	77758407	HJMKEF7EJW69	US	41.502739	-81.607334	218601	CASE WESTERN RESERVE U		Non-Elite	male	95	CLEVELAND	OH	Domestic Higher Education	441061712	UNITED STATES	N	12/1/19 0:00	11/30/20 0:00	839	Non-SBIR/STTR	2020	249000	NHLBI	155544	coastal
NIAID	10611009	7/5/22	PA-18-398	4R00AI141622-02	4	R00	AI	141622	2		LOVE, DONA	9/1/19	6/30/24	ZAI1-SRC(99)	15341814	5	Unavailable	42797571	LV8GL8MLU9A3	42797571	LV8GL8MLU9A3	US	40.883415	-74.055652	3117901	HACKENSACK U MED CTR		Non-Elite	male	100	HACKENSACK	NJ	Independent Hospitals	76011915	UNITED STATES	N	7/5/22	6/30/23	855	Non-SBIR/STTR	2022	249000	NIAID	140599	#N/A
NIGMS	10087571	3/24/20 0:00	PA-16-193	4R00GM127757-03	4	R00	GM	127757	3		FLICKER, PAULA F	9/1/18 0:00	3/31/23 0:00	NSS	10440962	12	BIOCHEMISTRY	73133571	GNJ7BBP73WE9	73133571	GNJ7BBP73WE9	US	42.275494	-83.743038	1506502	U OF MICHIGAN AT ANN ARBOR		Elite	male	59	ANN ARBOR	MI	SCHOOLS OF ARTS AND SCIENCES	481091276	UNITED STATES	N	4/1/20 0:00	3/31/21 0:00	859	Non-SBIR/STTR	2020	249000	NIGMS	171294	coastal
NCI	8961475	12/3/14 0:00	PA-10-063	4R00CA154880-04	4	R00	CA	154880	4		MUFSON, R ALLAN	7/15/11 0:00	11/30/17 0:00	NSS	10366409	49	Unavailable	20520466	PHMKYKKJLQS1	20520466	PHMKYKKJLQS1	US	32.9036	-117.24298	1180101	SANFORD BURNHAM PREBYS MED DISCOVERY INST		Non-Elite	male	100	LA JOLLA	CA	Research Institutes	920371005	UNITED STATES	N	12/2/14 0:00	11/30/15 0:00	396	Non-SBIR/STTR	2015	248999	NCI	127692	#N/A
NHLBI	7696697	12/24/08 0:00	PA-06-133	4R00HL087560-03	4	R00	HL	87560	3		ROTHGEB, ANN E	12/1/06 0:00	12/31/11 0:00	NSS	8630736	7	INTERNAL MEDICINE/MEDICINE	188435911	Z9CRZKD42ZT1	188435911	Z9CRZKD42ZT1	US	39.292248	-76.625629	820104	U OF MARYLAND BALTIMORE		Non-Elite	male	100	BALTIMORE	MD	SCHOOLS OF MEDICINE	212011508	UNITED STATES	N	1/1/09 0:00	12/31/09 0:00	838	Non-SBIR/STTR	2009	249000	NHLBI		#N/A
NIAMS	8277492	8/26/11 0:00	PA-10-063	4R00AR057501-03	4	R00	AR	57501	3		BAKER, CARL	9/1/11 0:00	8/31/14 0:00	NSS	8204617	12	BIOCHEMISTRY	2484665	NJ1YPQXQG7U5	2484665	NJ1YPQXQG7U5	US	40.345441	-74.655866	6661401	PRINCETON U		Elite	female	96	Princeton	NJ	SCHOOLS OF ARTS AND SCIENCES	85406000	UNITED STATES	N	9/1/11 0:00	8/31/12 0:00	846	Non-SBIR/STTR	2011	249000	NIAMS		coastal
NCCIH	7924286	2/1/10 0:00	PA-06-133	4R00AT004245-03	4	R00	AT	4245	3		SORKIN, BARBARA C	9/30/07 0:00	1/31/13 0:00	NSS	8794522	At-Large	NUTRITION	929929743	DNZNC466DGR7	929929743	DNZNC466DGR7	US	44.306715	-96.786041	7590501	SOUTH DAKOTA STATE U	338	Non-Elite	male	89	BROOKINGS	SD	EARTH SCIENCES/RESOURCES	570070001	UNITED STATES	N	2/1/10 0:00	1/31/11 0:00	213	Non-SBIR/STTR	2010	244698	NCCIH		#N/A
NCI	9989276	8/27/19 0:00	PA-16-193	4R00CA218891-03	4	R00	CA	218891	3		ESPEY, MICHAEL G	9/1/19 0:00	8/31/22 0:00	NSS	11968962	26	Unavailable	824771034	YDWAYVVQHNK5	824771034	YDWAYVVQHNK5	US	42.873378	-78.869243	3934901	ROSWELL PARK CANCER INST CORP		Non-Elite	male	100	BUFFALO	NY	Independent Hospitals	142630001	UNITED STATES	N	9/1/19 0:00	8/31/20 0:00	396	Non-SBIR/STTR	2019	248999	NCI	151337	#N/A
NIEHS	10050158	2/15/20 0:00	PA-16-193	4R00ES029571-03	4	R00	ES	29571	3		BOYLES, ABEE	8/15/18 0:00	1/31/23 0:00	NSS	12168707	13	PUBLIC HEALTH & PREV MEDICINE	621889815	QHF5ZZ114M72	621889815	QHF5ZZ114M72	US	40.8415	-73.9414	1833205	COLUMBIA U HEALTH SCI		Elite	female	95	NEW YORK	NY	SCHOOLS OF PUBLIC HEALTH	100323725	UNITED STATES	N	2/15/20 0:00	1/31/21 0:00	113	Non-SBIR/STTR	2020	249000	NIEHS	153704	coastal
NIMHD	9993695	7/14/20 0:00	PA-16-193	4R00MD012815-03	4	R00	MD	12815	3		LINARES, DEBORAH ELIZABETH	9/1/18 0:00	5/31/23 0:00	ZMD1-XLN(M1)	15193481	4	NUTRITION	153890272	SZPJL5ZRCLF4	153890272	SZPJL5ZRCLF4	US	38.948231	-92.327335	578002	U OF MISSOURI COLUMBIA		Non-Elite	unknown		COLUMBIA	MO	SCHOOLS OF MEDICINE	652110001	UNITED STATES	N	7/23/20 0:00	5/31/21 0:00	307	Other Research-Related	2020	249000	NIMHD	160645	coastal
NCI	9532339	8/7/17 0:00	PA-11-197	4R00CA188595-03	4	R00	CA	188595	3		MUFSON, R ALLAN	7/1/17 0:00	6/30/20 0:00	NSS	10070426	7	Unavailable	71723621	C1CPANL3EWK4	71723621	C1CPANL3EWK4	US	42.33982	-71.10568	758101	BETH ISRAEL DEACONESS MED CTR		Elite	male	75	BOSTON	MA	Independent Hospitals	22155400	UNITED STATES	N	7/1/17 0:00	6/30/18 0:00	396	Non-SBIR/STTR	2017	249000	NCI	143931	#N/A
NICHD	8839511	6/5/14 0:00	PA-11-197	4R00HD074670-02	4	R00	HD	74670	2		MUKHOPADHYAY, MAHUA	6/5/14 0:00	5/31/17 0:00	NSS	10318224	4	ANATOMY/CELL BIOLOGY	44387793	TP7EK8DZV6N5	44387793	TP7EK8DZV6N5	US	36.007766	-78.926475	2221101	DUKE U		Elite	female	99	DURHAM	NC	SCHOOLS OF MEDICINE	277054673	UNITED STATES	N	6/5/14 0:00	5/31/15 0:00	865	Non-SBIR/STTR	2014	249000	NICHD	165134	coastal
NCI	8121247	8/30/10 0:00		4R00CA131472-03	4	R00	CA	131472	3		YASSIN, RIHAB R	9/1/10 0:00	7/31/13 0:00	NSS	8903399	7	Unavailable	76593722	Z1L9F1MM1RY3	76593722	Z1L9F1MM1RY3	US	42.337481	-71.104964	1504801	BOSTON CHILDRENS HOSP		Elite	male	86	BOSTON	MA	Independent Hospitals	21155724	UNITED STATES	N	9/1/10 0:00	7/31/11 0:00	396	Non-SBIR/STTR	2010	249000	NCI		#N/A
NIMH	8305298	8/25/11 0:00		4R00MH083945-03	4	R00	MH	83945	3		BUHRING, BETTINA D	6/20/09 0:00	5/31/14 0:00	NSS	6916694	9	PSYCHOLOGY	3137015	QDE5UHE5XD16	3137015	QDE5UHE5XD16	US	37.233061	-80.421005	8968001	VIRGINIA POLYTECHNIC INST AND ST U		Non-Elite	female	98	BLACKSBURG	VA	SCHOOLS OF ARTS AND SCIENCES	240616100	UNITED STATES	N	8/26/11 0:00	5/31/12 0:00	242	Non-SBIR/STTR	2011	248973	NIMH		coastal
NIMH	10217408	7/30/20 0:00	PA-18-398	4R00MH118425-03	4	R00	MH	118425	3		DRISCOLL, JAMIE	9/1/20 0:00	6/30/23 0:00	NSS	14371026	45	ANATOMY/CELL BIOLOGY	46705849	MJC5FCYQTPE6	46705849	MJC5FCYQTPE6	US	33.64852	-117.82136	577504	U OF CALIFORNIA IRVINE		Non-Elite	male	99	IRVINE	CA	SCHOOLS OF MEDICINE	926970001	UNITED STATES	N	9/1/20 0:00	6/30/21 0:00	242	Non-SBIR/STTR	2020	249000	NIMH	219886	#N/A
NIAID	9473929	5/16/17 0:00	PA-15-083	4R00AI119401-02	4	R00	AI	119401	2		HAUGUEL, TERESA M	7/1/17 0:00	6/30/19 0:00	NSS	10228706	3	MICROBIOLOGY/IMMUN/VIROLOGY	47120084	TX2DAGQPENZ5	47120084	TX2DAGQPENZ5	US	38.543366	-121.72946	577503	U OF CALIFORNIA AT DAVIS		Non-Elite	male	99	DAVIS	CA	SCHOOLS OF MEDICINE	956186153	UNITED STATES	N	7/1/17 0:00	6/30/18 0:00	855	Non-SBIR/STTR	2017	249000	NIAID	158599	coastal
NIMH	8015748	2/23/10 0:00		4R00MH086162-02	4	R00	MH	86162	2		JOSEPH, JEYMOHAN	3/1/10 0:00	2/28/12 0:00	NSS	9467940	14	MICROBIOLOGY/IMMUN/VIROLOGY	110521739		110521739		US	40.85103	-73.844379	9433501	ALBERT EINSTEIN COLL OF MED		Non-Elite	male	99	BRONX	NY	SCHOOLS OF MEDICINE	104611900	UNITED STATES	N	3/1/10 0:00	2/28/11 0:00	242	Non-SBIR/STTR	2010	249000	NIMH		coastal
NCI	9613353	1/29/18 0:00	PA-14-042	4R00CA194314-03	4	R00	CA	194314	3		SPALHOLZ, BARBARA A	2/1/18 0:00	1/31/21 0:00	NSS	11325526	7	Unavailable	71723621	C1CPANL3EWK4	71723621	C1CPANL3EWK4	US	42.33982	-71.10568	758101	BETH ISRAEL DEACONESS MED CTR		Elite	male	100	BOSTON	MA	Independent Hospitals	22155400	UNITED STATES	N	2/1/18 0:00	1/31/19 0:00	396	Non-SBIR/STTR	2018	249000	NCI	142286	coastal
NCI	10640406	7/26/22	PA-19-130	4R00CA248335-03	4	R00	CA	248335	3		SARMA, ELIZABETH ANNE	5/11/20	5/31/25	Transition to Independence Study Section (I)[NCI-I]	14095843	7	PUBLIC HEALTH & PREV MEDICINE	149617367	UNVDZNFA8R29	149617367	UNVDZNFA8R29	US	42.335306	-71.102775	3212904	HARVARD SCH OF PUBLIC HEALTH		Elite	female	96	BOSTON	MA	SCHOOLS OF PUBLIC HEALTH	21156028	UNITED STATES	N	6/1/22	5/31/23	395	Non-SBIR/STTR	2022	248847	NCI	156017	coastal
NIA	7672791	8/29/08 0:00	PA-06-133	4R00AG031291-02	4	R00	AG	31291	2		MILLER, MARILYN	9/30/07 0:00	8/31/11 0:00	NSS	8199426	14	NONE	69687242	NKAZLXLL7Z91	69687242	NKAZLXLL7Z91	US	28.074039	-82.395963	513807	U OF SOUTH FLORIDA		Non-Elite	male	99	TAMPA	FL	SCHOOLS OF MEDICINE	336172008	UNITED STATES	N	9/1/08 0:00	8/31/09 0:00	866	Non-SBIR/STTR	2008	248996	NIA		coastal
NIGMS	9608813	1/22/18 0:00	PA-14-042	4R00GM115964-03	4	R00	GM	115964	3		FLICKER, PAULA F	9/1/15 0:00	1/31/21 0:00	NSS	11406257	10	BIOLOGY	170230239	V6AFQPN18437	170230239	V6AFQPN18437	US	30.291188	-97.737568	578403	U OF TEXAS AT AUSTIN		Non-Elite	male	99	AUSTIN	TX	SCHOOLS OF ARTS AND SCIENCES	787121139	UNITED STATES	N	2/1/18 0:00	1/31/19 0:00	859	Non-SBIR/STTR	2018	249000	NIGMS	175348	coastal
NINR	9695435	7/26/18 0:00	PA-15-083	4R00NR015822-02	4	R00	NR	15822	2		BANKS, DAVID	4/1/16 0:00	6/30/21 0:00	Nursing Science Review Committee[NRRC(64)]	10939820	2	NONE	168559177	G15AG3BLLMH4	168559177	G15AG3BLLMH4	US	41.265996	-96.010026	578104	U OF NEBRASKA MED CTR		Non-Elite	female	98	OMAHA	NE	SCHOOLS OF NURSING	681987835	UNITED STATES	N	7/26/18 0:00	6/30/19 0:00	361	Other Research-Related	2018	247889	NINR	162550	coastal
NIMH	8403201	1/10/12 0:00	PA-10-063	4R00MH092351-03	4	R00	MH	92351	3		ASANUMA, CHIIKO	9/10/10 0:00	12/31/14 0:00	NSS	8496938	37	BIOLOGY	72933393	G88KLJR3KYT5	72933393	G88KLJR3KYT5	US	34.017282	-118.281254	7636101	U OF SOUTHERN CALIFORNIA		Non-Elite	male	97	Los Angeles	CA	SCHOOLS OF ARTS AND SCIENCES	900894304	UNITED STATES	N	1/15/12 0:00	12/31/12 0:00	242	Non-SBIR/STTR	2012	248980	NIMH	216752	coastal
NIDA	10116573	6/25/20 0:00	PA-16-193	4R00DA043573-03	4	R00	DA	43573	3		LOSSIE, AMY C	7/1/20 0:00	6/30/23 0:00	NSS	10103081	3	OTHER BASIC SCIENCES	36156615	HH1NQ1B5MPV3	36156615	HH1NQ1B5MPV3	US	38.416466	-82.44721	4842001	MARSHALL U	759	Non-Elite	male	100	Huntington	WV	SCHOOLS OF MEDICINE	257550002	UNITED STATES	N	7/1/20 0:00	6/30/21 0:00	279	Non-SBIR/STTR	2020	248983	NIDA	168232	coastal
NCI	10617428	5/11/22	PA-20-188	4R00CA262152-02	4	R00	CA	262152	2		LI, JERRY	8/16/21	3/31/25	Transition to Independence Study Section (I)[NCI-I]	14918049	7	Unavailable	76593722	Z1L9F1MM1RY3	76593722	Z1L9F1MM1RY3	US	42.337481	-71.104964	1504801	BOSTON CHILDRENS HOSP		Elite	male	98	BOSTON	MA	Independent Hospitals	21155724	UNITED STATES	N	4/1/22	3/31/23	398	Non-SBIR/STTR	2022	249000	NCI	140678	#N/A
NIMH	8850636	6/25/14 0:00	PA-11-197	4R00MH094438-03	4	R00	MH	94438	3		CHAVEZ, MARK	4/1/14 0:00	3/31/17 0:00	NSS	7892126	5	Unavailable	46514535	MCKWJYCWNVN3	46514535	MCKWJYCWNVN3	US	42.393619	-71.191142	1876801	MCLEAN HOSP		Elite	male	99	BELMONT	MA	Independent Hospitals	24781064	UNITED STATES	N	6/11/14 0:00	3/31/15 0:00	242	Non-SBIR/STTR	2014	248250	NIMH	174080	coastal
AHRQ	9088537	7/28/15 0:00	RFA-HS-12-007	4R00HS022189-03	4	R00	HS	22189	3		WILLIS, TAMARA	8/1/15 0:00	7/31/18 0:00	NSS	10978604	4	Unavailable	44387793	TP7EK8DZV6N5	44387793	TP7EK8DZV6N5	US	36.007766	-78.926475	2221101	DUKE U		Elite	female	92	DURHAM	NC	Domestic Higher Education	277054673	UNITED STATES	N	8/1/15 0:00	7/31/16 0:00	226	Non-SBIR/STTR	2015	249000	AHRQ	156604	coastal
NINDS	8481743	6/29/12 0:00	PA-11-197	4R00NS075136-02	4	R00	NS	75136	2		TALLEY, EDMUND M	7/1/11 0:00	6/30/15 0:00	NSS	10427435	18	NEUROLOGY	9214214	HJD6G4D6TJY5	9214214	HJD6G4D6TJY5	US	37.426852	-122.17047	8046501	STANFORD U		Elite	male	88	STANFORD	CA	SCHOOLS OF MEDICINE	943052004	UNITED STATES	N	7/1/12 0:00	6/30/13 0:00	853	Non-SBIR/STTR	2012	249000	NINDS	199310	coastal
NIAID	10046745	12/23/19 0:00	PA-16-193	4R00AI135031-02	4	R00	AI	135031	2		PARK, EUN-CHUNG	7/27/18 0:00	11/30/21 0:00	NSS	12426793	1	MICROBIOLOGY/IMMUN/VIROLOGY	68552207	L6NFUM28LQM5	68552207	L6NFUM28LQM5	US	38.664368	-90.323797	9083901	WASHINGTON U		Non-Elite	male	71	SAINT LOUIS	MO	SCHOOLS OF MEDICINE	631304862	UNITED STATES	N	12/23/19 0:00	11/30/20 0:00	855	Non-SBIR/STTR	2020	249000	NIAID	192250	#N/A
NHLBI	10203220	9/3/20 0:00	PA-18-398	4R00HL148493-02	4	R00	HL	148493	2		HUANG, LI-SHIN	9/4/20 0:00	8/31/23 0:00	NSS	15276905	32	BIOMEDICAL ENGINEERING	800188161	EJCVPNN1WFS5	800188161	EJCVPNN1WFS5	US	32.991725	-96.743697	578409	U OF TEXAS DALLAS		Non-Elite	female	62	RICHARDSON	TX	BIOMED ENGR/COL ENGR/ENGR STA	750803021	UNITED STATES	N	9/4/20 0:00	8/31/21 0:00	837	Non-SBIR/STTR	2020	246552	NHLBI	161145	#N/A
NINR	9697502	7/30/18 0:00	PA-15-083	4R00NR015903-03	4	R00	NR	15903	3		ADAMS, LYNN S	5/1/18 0:00	4/30/21 0:00	NSS	10712991	7	OTHER HEALTH PROFESSIONS	63690705	YND4PLMC9AN7	63690705	YND4PLMC9AN7	US	33.50591	-86.799772	1288803	U OF ALABAMA AT BIRMINGHAM		Non-Elite	male	99	BIRMINGHAM	AL	SCHOOLS OF NURSING	352940001	UNITED STATES	N	5/1/18 0:00	4/30/19 0:00	361	Non-SBIR/STTR	2018	249000	NINR	167677	coastal
NIDA	8940324	5/7/15 0:00	PA-11-197	4R00DA034009-03	4	R00	DA	34009	3		PUROHIT, VISHNUDUTT	5/1/13 0:00	4/30/18 0:00	NSS	10920701	41	NONE	627797426	MR5QC5FCAVH5	627797426	MR5QC5FCAVH5	US	33.972585	-117.350361	577506	U OF CALIFORNIA RIVERSIDE		Non-Elite	male	100	RIVERSIDE	CA	SCHOOLS OF MEDICINE	925210001	UNITED STATES	N	5/15/15 0:00	4/30/16 0:00	279	Non-SBIR/STTR	2015	249000	NIDA	163816	coastal
NCI	8525742	9/20/12 0:00	PA-11-197	4R00CA151869-03	4	R00	CA	151869	3		MIETZ, JUDY	9/21/10 0:00	8/31/15 0:00	NSS	10208179	3	Unavailable	73757627	G7MQPLSUX1L4	73757627	G7MQPLSUX1L4	US	39.946632	-75.196604	1499101	CHILDRENS HOSP OF PHILADELPHIA		Elite	female	96	PHILADELPHIA	PA	Independent Hospitals	191462305	UNITED STATES	N	9/1/12 0:00	8/31/13 0:00	393	Non-SBIR/STTR	2012	249000	NCI	148214	#N/A
NIMH	8841464	7/31/14 0:00	PA-10-063	4R00MH093567-03	4	R00	MH	93567	3		ROSSI, ANDREW	5/1/11 0:00	7/31/17 0:00	NSS	10287508	5	PSYCHOLOGY	965717143	GTNBNWXJ12D5	965717143	DWH7MSXKA2A8; GTNBNWXJ12D5	US	36.143381	-86.803365	8721001	VANDERBILT U		Non-Elite	female	98	Nashville	TN	SCHOOLS OF ARTS AND SCIENCES	372032408	UNITED STATES	N	8/16/14 0:00	7/31/15 0:00	242	Non-SBIR/STTR	2014	249000	NIMH	180019	coastal
NIAID	9415534	3/27/17 0:00	PA-15-083	4R00AI121473-02	4	R00	AI	121473	2		GONDRE-LEWIS, TIMOTHY A	4/1/17 0:00	3/31/19 0:00	NSS	11263437	12	MICROBIOLOGY/IMMUN/VIROLOGY	121911077	M5SZJ6VHUHN8	121911077	M5SZJ6VHUHN8	US	40.669895	-73.974354	5998304	NEW YORK U SCH OF MED		Elite	female	96	NEW YORK	NY	SCHOOLS OF MEDICINE	10016	UNITED STATES	N	4/1/17 0:00	3/31/18 0:00	855	Non-SBIR/STTR	2017	249000	NIAID	146903	coastal
NCCIH	10459800	##########	PA-18-398	4R00AT010478-03	4	R00	AT	10478	3		BELFER, INNA	9/1/19 0:00	##########	ZAT1-AJT(10)	14796986	12	Unavailable	64931884	KUKXRCZ6NZC2	64931884	KUKXRCZ6NZC2	US	40.764045	-73.956024	5079202	SLOAN KETTERING INST CAN RES		Non-Elite	female	98	NEW YORK	NY	Research Institutes	100656007	UNITED STATES	N	9/15/21 0:00	##########	213	Other Research-Related	2021	249000	NCCIH	140678	#N/A
NHLBI	7929080	9/9/09 0:00	PA-07-297	4R00HL091133-02	4	R00	HL	91133	2		GOLDMAN, STEPHEN	9/10/09 0:00	7/31/12 0:00	NSS	8909840	5	ENGINEERING (ALL TYPES)	97394084	EMW9FC8J3HN4	97394084	EMW9FC8J3HN4	US	33.781897	-84.404009	676603	GEORGIA INST OF TECHNOLOGY		Non-Elite	male	99	ATLANTA	GA	BIOMED ENGR/COL ENGR/ENGR STA	303320415	UNITED STATES	N	9/10/09 0:00	7/31/10 0:00	837	Non-SBIR/STTR	2009	233550	NHLBI		coastal
NCI	8773654	12/27/13 0:00	PA-11-197	4R00CA166517-03	4	R00	CA	166517	3		SALNIKOW, KONSTANTIN	1/1/14 0:00	12/31/16 0:00	NSS	9662037	18	BIOLOGY	9214214	HJD6G4D6TJY5	9214214	HJD6G4D6TJY5	US	37.426852	-122.17047	8046501	STANFORD U		Elite	male	100	STANFORD	CA	SCHOOLS OF ARTS AND SCIENCES	943052004	UNITED STATES	N	1/1/14 0:00	12/31/14 0:00	396	Non-SBIR/STTR	2014	241530	NCI	150486	coastal
NIMH	9312923	9/15/16 0:00	PA-14-042	4R00MH105549-03	4	R00	MH	105549	3		VICENTIC, ALEKSANDRA	9/15/16 0:00	6/30/19 0:00	NSS	12104791	9	NEUROSCIENCES	800771594	ZUFBNVZ587D4	800771594	ZUFBNVZ587D4	US	29.703025	-95.403303	578417	U OF TEXAS HLTH SCI CTR HOUSTON		Non-Elite	male	96	HOUSTON	TX	SCHOOLS OF MEDICINE	770305400	UNITED STATES	N	9/15/16 0:00	6/30/17 0:00	242	Non-SBIR/STTR	2016	248883	NIMH	235079	#N/A
NIAMS	9292542	6/25/16 0:00	PA-14-042	4R00AR066696-03	4	R00	AR	66696	3		BOYCE, AMANDA T	7/1/16 0:00	5/31/19 0:00	NSS	8440473	1	Unavailable	6471700	Y2K4F9RPRRG7	6471700	Y2K4F9RPRRG7	US	44.02432	-92.46011	4976101	MAYO CLINIC ROCHESTER		Non-Elite	male	99	ROCHESTER	MN	Other Domestic Non-Profits	559050001	UNITED STATES	N	7/1/16 0:00	5/31/17 0:00	846	Non-SBIR/STTR	2016	249000	NIAMS	156604	coastal
NCI	8785173	3/7/14 0:00	PA-09-036	4R00CA151827-03	4	R00	CA	151827	3		PELROY, RICHARD	9/22/10 0:00	2/28/17 0:00	NSS	10250490	13	OTHER BASIC SCIENCES	78861598	C8H9CNG1VBD9	78861598	C8H9CNG1VBD9	US	40.790284	-73.946781	3839801	ICAHN SCH OF MED AT MOUNT SINAI		Non-Elite	male	99	NEW YORK	NY	SCHOOLS OF MEDICINE	100296574	UNITED STATES	N	3/7/14 0:00	2/28/15 0:00	393	Non-SBIR/STTR	2014	224101	NCI	132213	#N/A
NIMH	9323075	9/14/16 0:00	PA-11-197	4R00MH102352-03	4	R00	MH	102352	3		CHAVEZ, MARK	7/1/14 0:00	8/31/19 0:00	NSS	10902333	2	PSYCHOLOGY	7431505	SPVKK1RC2MZ3	7431505	SPVKK1RC2MZ3	US	40.013296	-105.251932	1199902	U OF COLORADO		Non-Elite	female	95	Boulder	CO	SCHOOLS OF ARTS AND SCIENCES	803031058	UNITED STATES	N	9/1/16 0:00	8/31/17 0:00	242	Non-SBIR/STTR	2016	249000	NIMH	183218	#N/A
NIMH	10392564	##########	PAR-18-814	4R00MH121355-03	4	R00	MH	121355	3		DRISCOLL, JAMIE	7/1/21 0:00	##########	NSS	10740456	10	PSYCHIATRY	170230239	V6AFQPN18437	170230239	V6AFQPN18437	US	30.291188	-97.737568	578403	U OF TEXAS AT AUSTIN		Non-Elite	female	98	AUSTIN	TX	SCHOOLS OF MEDICINE	787121139	UNITED STATES	N	7/1/21 0:00	##########	242	Non-SBIR/STTR	2021	249000	NIMH	176151	#N/A
NIDDK	7685845	2/13/09 0:00		4R00DK077505-03	4	R00	DK	77505	3		LAUGHLIN, MAREN R	2/15/09 0:00	1/31/12 0:00	NSS	8622706	7	BIOCHEMISTRY	603007902	SHHBRBAPSM35	603007902; 625168166	DKNHLK3NBPH7; DL9MTNNKWYR9; GY8GKRUWM7D5; HA48EWMJFV47; HCNBFNDANNV5; HCRDU7BNPZ13; HCWTYJ7KQ4U6; HEBLAL94JHP7; NKCRSKVJBXE3; SHHBRBAPSM35; TA1NYNZ27LQ7; WJJRCLJ936C8; X51WYC1QEPD7; XNBJV454V2W1; YCJNP5NJYCY1; YW8WNKKANDR9	US	39.779213	-86.175288	577806	INDIANA U PURDUE U AT INDIANAPOLIS		Non-Elite	unknown		INDIANAPOLIS	IN	SCHOOLS OF MEDICINE	462022915	UNITED STATES	N	2/15/09 0:00	1/31/10 0:00	847	Non-SBIR/STTR	2009	249000	NIDDK		#N/A
NIA	10369167	##########	PA-16-193	4R00AG056656-04	4	R00	AG	56656	4		GUO, MAX	##########	##########	NSS	14425417	5	GENETICS	555917996	KABJZBBJ4B54	555917996	KABJZBBJ4B54	US	44.975143	-93.227003	1450402	U OF MINNESOTA		Non-Elite	male	53	MINNEAPOLIS	MN	SCHOOLS OF MEDICINE	554552070	UNITED STATES	N	4/1/21 0:00	##########	866	Non-SBIR/STTR	2021	249000	NIA	221878	coastal
NHLBI	8119222	8/27/10 0:00	PA-10-063	4R00HL091138-03	4	R00	HL	91138	3		PRZYWARA, DENNIS	9/1/10 0:00	1/31/14 0:00	NSS	8212116	2	INTERNAL MEDICINE/MEDICINE	9095365	LL8GLEVH6MG3	9095365	LL8GLEVH6MG3	US	40.764542	-111.850317	514002	U OF UTAH		Non-Elite	male	99	SALT LAKE CITY	UT	SCHOOLS OF MEDICINE	841128906	UNITED STATES	N	9/1/10 0:00	1/31/12 0:00	837	Non-SBIR/STTR	2010	249000	NHLBI		#N/A
NIA	9789435	9/22/18 0:00	PA-16-193	4R00AG053406-03	4	R00	AG	53406	3		GUO, MAX	9/30/18 0:00	5/31/21 0:00	NSS	11729543	8	NONE	73130411	FLJ7DQKLL226	73130411	FLJ7DQKLL226	US	42.363198	-71.068772	4907701	MASSACHUSETTS GENERAL HOSP		Elite	male	100	BOSTON	MA	HOSPITALS	21142621	UNITED STATES	N	9/30/18 0:00	5/31/19 0:00	866	Non-SBIR/STTR	2018	248047	NIA	188340	coastal
NINDS	8179345	11/29/10 0:00	PA-10-063	4R00NS067239-03	4	R00	NS	67239	3		MAMOUNAS, LAURA	9/30/09 0:00	11/30/13 0:00	NSS	6370147	1	GENETICS	68552207	L6NFUM28LQM5	68552207	L6NFUM28LQM5	US	38.664368	-90.323797	9083901	WASHINGTON U		Non-Elite	male	99	SAINT LOUIS	MO	SCHOOLS OF MEDICINE	631304862	UNITED STATES	N	12/1/10 0:00	11/30/11 0:00	853	Non-SBIR/STTR	2011	249000	NINDS		coastal
NIA	9137167	9/15/15 0:00	PA-11-197	4R00AG042495-03	4	R00	AG	42495	3		WISE, BRADLEY C	9/30/15 0:00	6/30/18 0:00	NSS	8508263	30	BIOCHEMISTRY	800771545	YZJ6DKPM4W63	800771545	YZJ6DKPM4W63	US	32.811963	-96.837534	578404	UT SOUTHWESTERN MED CTR		Non-Elite	male	99	DALLAS	TX	SCHOOLS OF MEDICINE	753909105	UNITED STATES	N	9/30/15 0:00	6/30/16 0:00	866	Non-SBIR/STTR	2015	248999	NIA	181978	coastal
NHLBI	9306253	8/22/16 0:00	PA-11-197	4R00HL123484-03	4	R00	HL	123484	3		WELNIAK, LISBETH A	8/1/14 0:00	7/31/19 0:00	NSS	11121779	7	INTERNAL MEDICINE/MEDICINE	605799469	HD1WMN6945W6	605799469	HD1WMN6945W6	US	47.660307	-122.315168	9087701	U OF WASHINGTON		Elite	male	99	SEATTLE	WA	SCHOOLS OF MEDICINE	981959472	UNITED STATES	N	9/1/16 0:00	7/31/17 0:00	837	Non-SBIR/STTR	2016	249000	NHLBI	161165	coastal
NINR	8779803	3/22/14 0:00	PA-11-197	4R00NR013593-03	4	R00	NR	13593	3		MATOCHA, MARTHA F	3/25/14 0:00	2/28/17 0:00	NSS	10918573	3	MICROBIOLOGY/IMMUN/VIROLOGY	806345617	ED44Y3W6P7B9	806345617	ED44Y3W6P7B9	US	32.232844	-110.959467	490201	U OF ARIZONA		Non-Elite	male	68	TUCSON	AZ	SCHOOLS OF MEDICINE	857210158	UNITED STATES	N	3/25/14 0:00	2/28/15 0:00	361	Non-SBIR/STTR	2014	246512	NINR	162714	coastal
NIA	10073683	3/20/20 0:00	PA-16-193	4R00AG057825-03	4	R00	AG	57825	3		FRIDELL, YIH-WOEI	8/15/18 0:00	3/31/23 0:00	NSS	11009369	9	NUTRITION	3137015	QDE5UHE5XD16	3137015	QDE5UHE5XD16	US	37.233061	-80.421005	8968001	VIRGINIA POLYTECHNIC INST AND ST U		Non-Elite	male	99	BLACKSBURG	VA	EARTH SCIENCES/RESOURCES	240616100	UNITED STATES	N	4/1/20 0:00	3/31/21 0:00	866	Non-SBIR/STTR	2020	225327	NIA	155373	coastal
NIDA	8264800	6/9/11 0:00		4R00DA030396-02	4	R00	DA	30396	2		SORENSEN, ROGER	6/15/11 0:00	5/31/14 0:00	NSS	8408850	4	PHARMACOLOGY	72051394	YRXVL4JYCEF5	72051394	YRXVL4JYCEF5	US	40.41872	-86.910361	1481402	PURDUE U		Non-Elite	male	99	WEST LAFAYETTE	IN	SCHOOLS OF PHARMACY	47906	UNITED STATES	N	6/15/11 0:00	5/31/12 0:00	279	Non-SBIR/STTR	2011	248901	NIDA		#N/A
NICHD	10291010	##########	PA-16-193	4R00HD092613-03	4	R00	HD	92613	3		PARISI, MELISSA	7/1/21 0:00	##########	NSS	10250062	7	BIOLOGY	98987217	W8XEAJDKMXH3	98987217	W8XEAJDKMXH3	US	41.871509	-87.667721	577703	U OF ILLINOIS AT CHICAGO	1930	Non-Elite	male	99	Chicago	IL	SCHOOLS OF ARTS AND SCIENCES	606124305	UNITED STATES	N	7/1/21 0:00	##########	865	Non-SBIR/STTR	2021	249000	NICHD	195352	coastal
NIMH	8090586	8/20/10 0:00	PA-10-063	4R00MH083943-03	4	R00	MH	83943	3		VICENTIC, ALEKSANDRA	8/25/10 0:00	7/30/13 0:00	NSS	7076068	10	NONE	170230239	V6AFQPN18437	170230239	V6AFQPN18437	US	30.291188	-97.737568	578403	U OF TEXAS AT AUSTIN		Non-Elite	male	99	AUSTIN	TX	SCHOOLS OF ARTS AND SCIENCES	787121139	UNITED STATES	N	8/25/10 0:00	7/31/11 0:00	242	Non-SBIR/STTR	2010	247083	NIMH		coastal
NCI	10249484	9/2/20 0:00	PA-16-193	4R00CA230192-03	4	R00	CA	230192	3		DASCHNER, PHILLIP J	9/1/20 0:00	8/30/23 0:00	NSS	14726992	7	INTERNAL MEDICINE/MEDICINE	1910777	FTMTDMBR29C7	1910777	FTMTDMBR29C7	US	39.325256	-76.605131	4134401	JOHNS HOPKINS U		Elite	female	97	BALTIMORE	MD	SCHOOLS OF MEDICINE	212182680	UNITED STATES	N	9/1/20 0:00	8/31/21 0:00	396	Non-SBIR/STTR	2020	249000	NCI	152061	#N/A
NIBIB	9929673	7/26/19 0:00	PA-16-193	4R00EB023990-03	4	R00	EB	23990	3		ATANASIJEVIC, TATJANA	8/1/19 0:00	4/30/22 0:00	NSS	12596125	1	Unavailable	191510239	M7PNRH24BBM8	191510239	M7PNRH24BBM8	US	39.618877	-79.973319	9163701	WEST VIRGINIA U	1232	Non-Elite	male	98	MORGANTOWN	WV	Domestic Higher Education	265066845	UNITED STATES	N	8/1/19 0:00	4/30/20 0:00	286	Non-SBIR/STTR	2019	248999	NIBIB	163815	#N/A
NIA	8193723	5/25/11 0:00	PA-07-297	4R00AG032361-02	4	R00	AG	32361	2		MILLER, MARILYN	6/1/11 0:00	5/31/14 0:00	NSS	9164661	4	PSYCHOLOGY	627906399	JBQ9M3PLFDP5	627906399	JBQ9M3PLFDP5	US	43.075704	-87.877999	578504	U OF WISCONSIN MILWAUKEE		Non-Elite	female	90	MILWAUKEE	WI	SCHOOLS OF ARTS AND SCIENCES	532010340	UNITED STATES	N	6/1/11 0:00	5/31/12 0:00	866	Non-SBIR/STTR	2011	249000	NIA		#N/A
NHLBI	8828402	7/10/14 0:00	PA-11-197	4R00HL112853-03	4	R00	HL	112853	3		CARLSON, DREW E	7/1/12 0:00	6/30/17 0:00	NSS	10755242	2	INTERNAL MEDICINE/MEDICINE	57123192	QD4MGHFDJKU1	57123192	QD4MGHFDJKU1	US	39.980272	-75.157051	8240301	TEMPLE U OF THE COMMONWEALTH		Non-Elite	male	99	PHILADELPHIA	PA	SCHOOLS OF MEDICINE	191226003	UNITED STATES	N	7/15/14 0:00	6/30/15 0:00	837	Non-SBIR/STTR	2014	249000	NHLBI	159787	coastal
NIA	8683362	8/14/13 0:00	PA-10-063	4R00AG037716-03	4	R00	AG	37716	3		PETANCESKA, SUZANA	5/15/11 0:00	5/31/16 0:00	NSS	9848961	32	Unavailable	800188161	EJCVPNN1WFS5	800188161	EJCVPNN1WFS5	US	32.991725	-96.743697	578409	U OF TEXAS DALLAS		Non-Elite	male	82	RICHARDSON	TX	Domestic Higher Education	750803021	UNITED STATES	N	8/15/13 0:00	5/31/14 0:00	866	Non-SBIR/STTR	2013	248998	NIA	162744	#N/A
NCI	9513108	8/15/17 0:00	PA-14-042	4R00CA198857-03	4	R00	CA	198857	3		WANG, CHIAYENG	9/1/17 0:00	7/31/20 0:00	NSS	11743221	8	Unavailable	73130411	FLJ7DQKLL226	73130411	FLJ7DQKLL226	US	42.363198	-71.068772	4907701	MASSACHUSETTS GENERAL HOSP		Elite	male	99	BOSTON	MA	Independent Hospitals	21142621	UNITED STATES	N	9/1/17 0:00	7/31/18 0:00	396	Non-SBIR/STTR	2017	249000	NCI	145614	coastal
NCI	9814790	11/20/18 0:00	PA-16-193	4R00CA215307-03	4	R00	CA	215307	3		SPALHOLZ, BARBARA A	12/1/18 0:00	11/30/21 0:00	NSS	12030708	2	BIOCHEMISTRY	9095365	LL8GLEVH6MG3	9095365	LL8GLEVH6MG3	US	40.764542	-111.850317	514002	U OF UTAH		Non-Elite	male	99	SALT LAKE CITY	UT	SCHOOLS OF MEDICINE	841128906	UNITED STATES	N	12/1/18 0:00	11/30/19 0:00	396	Non-SBIR/STTR	2019	249000	NCI	163279	#N/A
NCI	9189154	5/2/16 0:00	PA-11-197	4R00CA176376-02	4	R00	CA	176376	2		MCCARTHY, SUSAN A	2/1/16 0:00	1/31/19 0:00	NSS	11385850	7	Unavailable	78200995	HMSNCM57QNR5	78200995	HMSNCM57QNR5	US	47.627342	-122.331593	861001	FRED HUTCHINSON CANCER RES CTR		Elite	male	100	SEATTLE	WA	Research Institutes	981094433	UNITED STATES	N	2/1/16 0:00	1/31/17 0:00	396	Non-SBIR/STTR	2016	248996	NCI	141475	coastal
NCI	8312046	8/29/11 0:00	PA-07-297	4R00CA140708-04	4	R00	CA	140708	4		MOHLA, SURESH	9/1/09 0:00	8/31/14 0:00	NSS	9560372	4	PHYSIOLOGY	608195277	D3LHU66KBLD5	608195277	D3LHU66KBLD5	US	35.9316	-79.057377	578206	U OF NORTH CAROLINA CHAPEL HILL		Elite	male	99	CHAPEL HILL	NC	SCHOOLS OF MEDICINE	275995023	UNITED STATES	N	9/1/11 0:00	8/31/12 0:00	396	Non-SBIR/STTR	2011	249000	NCI		coastal
NIGMS	9391438	12/12/16 0:00	PA-11-197	4R00GM110332-03	4	R00	GM	110332	3		MELILLO, AMANDA A	8/15/14 0:00	11/30/19 0:00	NSS	10872449	2	Unavailable	42140483	XR6LMXNKDJJ1	42140483	XR6LMXNKDJJ1	US	44.365361	-68.196303	7096501	JACKSON lab		Non-Elite	female	99	BAR HARBOR	ME	Research Institutes	46091523	UNITED STATES	N	12/15/16 0:00	11/30/17 0:00	859	Non-SBIR/STTR	2017	249000	NIGMS	159735	#N/A
NIGMS	8509836	7/30/12 0:00		4R00GM094335-03	4	R00	GM	94335	3		DEATHERAGE, JAMES F	9/1/10 0:00	7/31/15 0:00	NSS	9889014	12	ANATOMY/CELL BIOLOGY	94878337	KMH5K9V7S518	94878337	KMH5K9V7S518	US	37.767442	-122.413937	577508	U OF CALIFORNIA SAN FRANCISCO		Elite	female	98	SAN FRANCISCO	CA	SCHOOLS OF DENTISTRY/ORAL HYGN	941432510	UNITED STATES	N	8/1/12 0:00	7/31/13 0:00	859	Non-SBIR/STTR	2012	249000	NIGMS	193606	#N/A
NINR	8298712	8/5/11 0:00		4R00NR011054-03	4	R00	NR	11054	3		HUSS, KAREN	8/5/11 0:00	6/30/14 0:00	NSS	7893133	4	OTHER HEALTH PROFESSIONS	44387793	TP7EK8DZV6N5	44387793	TP7EK8DZV6N5	US	36.007766	-78.926475	2221101	DUKE U		Elite	female	98	DURHAM	NC	SCHOOLS OF NURSING	277054673	UNITED STATES	N	8/5/11 0:00	6/30/12 0:00	361	Non-SBIR/STTR	2011	245366	NINR		coastal
NEI	8889375	8/11/14 0:00	PA-11-197	4R00EY022910-03	4	R00	EY	22910	3		GREENWELL, THOMAS	7/1/14 0:00	6/30/17 0:00	NSS	11232546	12	OPHTHALMOLOGY	94878337	KMH5K9V7S518	94878337	KMH5K9V7S518	US	37.767442	-122.413937	577508	U OF CALIFORNIA SAN FRANCISCO		Elite	male	91	SAN FRANCISCO	CA	SCHOOLS OF MEDICINE	941432510	UNITED STATES	N	7/1/14 0:00	6/30/15 0:00	867	Non-SBIR/STTR	2014	249000	NEI	249000	coastal
NIMH	9405940	8/1/17 0:00	PA-14-042	4R00MH106719-03	4	R00	MH	106719	3		CHAVEZ, MARK	8/1/17 0:00	5/31/20 0:00	NSS	10067801	10	PSYCHIATRY	170230239	V6AFQPN18437	170230239	V6AFQPN18437	US	30.291188	-97.737568	578403	U OF TEXAS AT AUSTIN		Non-Elite	male	99	AUSTIN	TX	SCHOOLS OF MEDICINE	787121139	UNITED STATES	N	8/1/17 0:00	5/31/18 0:00	242	Non-SBIR/STTR	2017	248999	NIMH	161271	coastal
NIDDK	8978406	5/14/15 0:00	PA-11-197	4R00DK097141-03	4	R00	DK	97141	3		HYDE, JAMES F	5/15/15 0:00	4/30/18 0:00	NSS	11166217	12	BIOCHEMISTRY	73133571	GNJ7BBP73WE9	73133571	GNJ7BBP73WE9	US	42.275494	-83.743038	1506502	U OF MICHIGAN AT ANN ARBOR		Elite	female	98	ANN ARBOR	MI	SCHOOLS OF ARTS AND SCIENCES	481091276	UNITED STATES	N	5/15/15 0:00	4/30/16 0:00	847	Non-SBIR/STTR	2015	248684	NIDDK	211822	#N/A
NHLBI	9172344	1/15/16 0:00	PA-11-197	4R00HL121076-03	4	R00	HL	121076	3		CHEN, JUE	12/12/13 0:00	12/31/18 0:00	NSS	10974990	18	INTERNAL MEDICINE/MEDICINE	4514360	MKAGLD59JRL1	4514360	MKAGLD59JRL1	US	40.440909	-79.959125	2059802	U OF PITTSBURGH AT PITTSBURGH		Elite	male	100	PITTSBURGH	PA	SCHOOLS OF MEDICINE	152133320	UNITED STATES	N	1/15/16 0:00	12/31/16 0:00	837	Non-SBIR/STTR	2016	249000	NHLBI	161688	coastal
NIGMS	10553783	2/28/22	PA-19-130	4R00GM135515-03	4	R00	GM	135515	3		ADKINS, RONALD	2/18/20	2/28/25	NSS	15075513	5	VETERINARY SCIENCES	41485301	XRJSGX384TD6	41485301	XRJSGX384TD6	US	46.728892	-117.155742	9082001	WASHINGTON STATE U		Non-Elite	male	95	PULLMAN	WA	SCHOOLS OF VETERINARY MEDICINE	991641060	UNITED STATES	N	3/1/22	2/28/23	859	Non-SBIR/STTR	2022	249000	NIGMS	162745	coastal
NIAAA	9987771	9/5/19 0:00	PA-16-193	4R00AA026317-02	4	R00	AA	26317	2		FREEMAN, ROBERT	9/1/19 0:00	8/31/22 0:00	NSS	14771745	7	Unavailable	605799469	HD1WMN6945W6	605799469	HD1WMN6945W6	US	47.660307	-122.315168	9087701	U OF WASHINGTON		Elite	female	98	SEATTLE	WA	Domestic Higher Education	981959472	UNITED STATES	N	9/1/19 0:00	8/31/20 0:00	273	Non-SBIR/STTR	2019	248999	NIAAA	201440	coastal
NIAMS	9377581	2/28/17 0:00	PA-14-042	4R00AR067283-03	4	R00	AR	67283	3		WANG, FEI	3/1/17 0:00	2/29/20 0:00	NSS	11149620	3	ORTHOPEDICS	42250712	GM1XX56LEP58	42250712	GM1XX56LEP58	US	39.953462	-75.193983	6463801	U OF PENNSYLVANIA		Elite	male	99	PHILADELPHIA	PA	SCHOOLS OF MEDICINE	191046205	UNITED STATES	N	3/1/17 0:00	2/28/18 0:00	846	Non-SBIR/STTR	2017	249000	NIAMS	154659	#N/A
NIMH	9113112	8/21/15 0:00	PA-11-197	4R00MH101240-03	4	R00	MH	101240	3		BECKEL-MITCHENER, ANDREA C	8/1/13 0:00	5/31/18 0:00	NSS	7251875	1	ANATOMY/CELL BIOLOGY	53785812	XNY5ULPU8EN6	53785812	XNY5ULPU8EN6	US	29.935429	-90.12279	8424601	TULANE U OF LOUISIANA		Non-Elite	female	95	NEW ORLEANS	LA	SCHOOLS OF ARTS AND SCIENCES	701185665	UNITED STATES	N	8/24/15 0:00	5/31/16 0:00	242	Non-SBIR/STTR	2015	248413	NIMH	177474	#N/A
NIDCR	7624111	8/6/08 0:00	PA-07-297	4R00DE018088-03	4	R00	DE	18088	3		SCHOLNICK, STEVEN	12/1/06 0:00	7/31/11 0:00	NSS	6978193	10	BIOLOGY	170230239	V6AFQPN18437	170230239	V6AFQPN18437	US	30.291188	-97.737568	578403	U OF TEXAS AT AUSTIN		Non-Elite	male	95	AUSTIN	TX	SCHOOLS OF ARTS AND SCIENCES	787121139	UNITED STATES	N	8/1/08 0:00	7/31/09 0:00	121	Non-SBIR/STTR	2008	249000	NIDCR		coastal
NHLBI	10044061	11/28/19 0:00	PA-16-193	4R00HL135403-03	4	R00	HL	135403	3		LU, JINING	9/1/17 0:00	11/30/22 0:00	NSS	11689529	12	INTERNAL MEDICINE/MEDICINE	94878337	KMH5K9V7S518	94878337	KMH5K9V7S518	US	37.767442	-122.413937	577508	U OF CALIFORNIA SAN FRANCISCO		Elite	male	97	SAN FRANCISCO	CA	SCHOOLS OF MEDICINE	941432510	UNITED STATES	N	12/1/19 0:00	11/30/20 0:00	838	Non-SBIR/STTR	2020	249000	NHLBI	160643	#N/A
NIDCR	9272571	8/23/16 0:00	PA-11-197	4R00DE024543-03	4	R00	DE	24543	3		MELILLO, AMANDA A	8/23/16 0:00	6/30/19 0:00	NSS	11404539	52	Unavailable	76364392	FL8UNYTG72D1	76364392	FL8UNYTG72D1	US	39.099845	-77.193698	10004362	J CRAIG VENTER INST INC		Non-Elite	female	98	LA JOLLA	CA	Research Institutes	920373498	UNITED STATES	N	8/23/16 0:00	6/30/17 0:00	121	Non-SBIR/STTR	2016	248999	NIDCR	127692	coastal
NCI	8013458	3/25/10 0:00	PA-07-297	4R00CA127360-02	4	R00	CA	127360	2		OKANO, PAUL	6/1/08 0:00	3/31/13 0:00	Institutional Training and Education Study Section (F)[NCI-F]	8665674	1	INTERNAL MEDICINE/MEDICINE	68552207	L6NFUM28LQM5	68552207	L6NFUM28LQM5	US	38.664368	-90.323797	9083901	WASHINGTON U		Non-Elite	male	99	SAINT LOUIS	MO	SCHOOLS OF MEDICINE	631304862	UNITED STATES	N	4/1/10 0:00	3/31/11 0:00	398	Non-SBIR/STTR	2010	249000	NCI		coastal
NICHD	10393206	##########	PA-18-398	4R00HD097290-03	4	R00	HD	97290	3		KAU, ALICE S	5/1/21 0:00	##########	NSS	11581564	5	PEDIATRICS	66469933	S352L5PJLMP8	66469933	S352L5PJLMP8	US	33.791247	-84.3249	2384501	EMORY U		Non-Elite	female	98	ATLANTA	GA	SCHOOLS OF MEDICINE	303221007	UNITED STATES	N	5/1/21 0:00	##########	865	Non-SBIR/STTR	2021	249131	NICHD	159359	coastal
NIAAA	8905475	8/27/14 0:00	PA-11-197	4R00AA020839-04	4	R00	AA	20839	4		LIU, QI-YING	9/1/14 0:00	8/31/17 0:00	NSS	9564046	2	Unavailable	782627814	M7KCJ79FAVH5	782627814	M7KCJ79FAVH5	US	29.957378	-90.082793	577902	LSU HEALTH SCI CTR		Non-Elite	male	100	NEW ORLEANS	LA	Domestic Higher Education	701127021	UNITED STATES	N	9/1/14 0:00	8/31/15 0:00	273	Non-SBIR/STTR	2014	248997	NIAAA	170546	coastal
NEI	7740427	2/6/09 0:00	PA-07-297	4R00EY018131-03	4	R00	EY	18131	3		GREENWELL, THOMAS	2/1/08 0:00	1/31/12 0:00	NSS	6268195	3	PHYSIOLOGY	806345617	ED44Y3W6P7B9	806345617	ED44Y3W6P7B9	US	32.232844	-110.959467	490201	U OF ARIZONA		Non-Elite	female	98	TUCSON	AZ	SCHOOLS OF MEDICINE	857210158	UNITED STATES	N	2/1/09 0:00	1/31/10 0:00	867	Non-SBIR/STTR	2009	246627	NEI		coastal
NIDDK	10213370	7/29/20 0:00	PA-16-193	4R00DK117509-03	4	R00	DK	117509	3		SPAIN, LISA M	9/1/20 0:00	8/31/23 0:00	NSS	10876530	3	PUBLIC HEALTH & PREV MEDICINE	47120084	TX2DAGQPENZ5	47120084	TX2DAGQPENZ5	US	38.543366	-121.72946	577503	U OF CALIFORNIA AT DAVIS		Non-Elite	female	95	DAVIS	CA	EARTH SCIENCES/RESOURCES	956186153	UNITED STATES	N	9/1/20 0:00	8/31/21 0:00	847	Non-SBIR/STTR	2020	249000	NIDDK	158599	coastal
NIA	9990932	8/21/19 0:00	PA-16-193	4R00AG055684-03	4	R00	AG	55684	3		STOECKEL, LUKE	9/1/19 0:00	5/31/22 0:00	NSS	12390632	37	Unavailable	72933393	G88KLJR3KYT5	72933393	G88KLJR3KYT5	US	34.017282	-118.281254	7636101	U OF SOUTHERN CALIFORNIA		Non-Elite	female	74	Los Angeles	CA	Domestic Higher Education	900894304	UNITED STATES	N	9/1/19 0:00	5/31/20 0:00	866	Non-SBIR/STTR	2019	251102	NIA	152183	coastal
NIA	9830879	12/24/18 0:00	PA-14-042	4R00AG050764-03	4	R00	AG	50764	3		YANG, AUSTIN JYAN-YU	1/1/19 0:00	11/30/21 0:00	NSS	12416078	18	INTERNAL MEDICINE/MEDICINE	4514360	MKAGLD59JRL1	4514360	MKAGLD59JRL1	US	40.440909	-79.959125	2059802	U OF PITTSBURGH AT PITTSBURGH		Elite	female	98	PITTSBURGH	PA	SCHOOLS OF MEDICINE	152133320	UNITED STATES	N	1/1/19 0:00	11/30/19 0:00	866	Non-SBIR/STTR	2019	249000	NIA	159106	#N/A
NIMH	9592603	4/27/18 0:00	PA-16-077	4R00MH109667-03	4	R00	MH	109667	3		CHAVEZ, MARK	9/14/16 0:00	12/31/20 0:00	NSS	11176362	7	PSYCHIATRY	98987217	W8XEAJDKMXH3	98987217	W8XEAJDKMXH3	US	41.871509	-87.667721	577703	U OF ILLINOIS AT CHICAGO		Non-Elite	female	64	Chicago	IL	SCHOOLS OF MEDICINE	606124305	UNITED STATES	N	4/24/18 0:00	12/31/18 0:00	242	Non-SBIR/STTR	2018	248999	NIMH	155722	#N/A
NICHD	9631804	5/22/18 0:00	PA-15-083	4R00HD086232-03	4	R00	HD	86232	3		MAZLOOMDOOST, DONNA	5/25/18 0:00	4/30/21 0:00	NSS	11846767	12	OBSTETRICS & GYNECOLOGY	94878337	KMH5K9V7S518	94878337	KMH5K9V7S518	US	37.767442	-122.413937	577508	U OF CALIFORNIA SAN FRANCISCO		Elite	male	84	SAN FRANCISCO	CA	SCHOOLS OF MEDICINE	941432510	UNITED STATES	N	5/25/18 0:00	4/30/19 0:00	865	Non-SBIR/STTR	2018	249065	NICHD	156232	coastal
NINDS	9022588	5/1/15 0:00	PA-11-197	4R00NS079471-03	4	R00	NS	79471	3		CHEN, DAOFEN	5/15/15 0:00	4/30/18 0:00	NST-2 Study Section [NST-2]	9630419	18	NEUROSCIENCES	4514360	MKAGLD59JRL1	4514360	MKAGLD59JRL1	US	40.440909	-79.959125	2059802	U OF PITTSBURGH AT PITTSBURGH		Elite	unknown		PITTSBURGH	PA	SCHOOLS OF MEDICINE	152133320	UNITED STATES	N	5/15/15 0:00	4/30/16 0:00	853	Non-SBIR/STTR	2015	249000	NINDS	180939	#N/A
NHLBI	10400967	##########	PA-18-398	4R00HL146969-03	4	R00	HL	146969	3		BALIJEPALLI, RAVI C	7/1/21 0:00	##########	NSS	12598928	3	SURGERY	832127323	DLWBSLWAJWR1	832127323	DLWBSLWAJWR1	US	39.999598	-83.033131	6218701	OHIO STATE U		Non-Elite	male	100	COLUMBUS	OH	SCHOOLS OF MEDICINE	432101016	UNITED STATES	N	7/1/21 0:00	##########	837	Non-SBIR/STTR	2021	249000	NHLBI	158095	coastal
NIMHD	9993680	##########	PA-16-193	4R00MD012253-03	4	R00	MD	12253	3		WONNUM, SUNDANIA J W	##########	##########	ZMD1-XLN(M1)	14321655	7	DENTISTRY	47006379	JDLVAVGYJQ21	47006379	JDLVAVGYJQ21	US	42.335672	-71.104237	3212902	HARVARD MED SCH		Elite	female	82	BOSTON	MA	SCHOOLS OF DENTISTRY/ORAL HYGN	21201616	UNITED STATES	N	6/1/21 0:00	##########	307	Other Research-Related	2021	249000	NIMHD	147337	coastal
NINDS	9541072	8/21/17 0:00	PA-15-083	4R00NS096217-03	4	R00	NS	96217	3		GUBITZ, AMELIE	9/30/17 0:00	8/31/20 0:00	NSS	11913358	13	NONE	831361857	EUYXHRL5MLL3	831361857	EUYXHRL5MLL3	US	40.815655	-73.950549	10023818	ADVANCED SCI RES CTR		Non-Elite	female	96	NEW YORK	NY	ORGANIZED RESEARCH UNITS	100311246	UNITED STATES	N	9/30/17 0:00	8/31/18 0:00	853	Non-SBIR/STTR	2017	249000	NINDS	218503	coastal
NIGMS	8257994	6/6/11 0:00	PA-10-063	4R00GM090042-03	4	R00	GM	90042	3		ECKSTRAND, IRENE A	1/1/10 0:00	6/30/14 0:00	NSS	6135986	2	GENETICS	9095365	LL8GLEVH6MG3	9095365	LL8GLEVH6MG3	US	40.764542	-111.850317	514002	U OF UTAH		Non-Elite	male	88	SALT LAKE CITY	UT	SCHOOLS OF MEDICINE	841128906	UNITED STATES	N	7/1/11 0:00	6/30/12 0:00	859	Non-SBIR/STTR	2011	249000	NIGMS		coastal
NHLBI	9883870	8/7/19 0:00	PA-16-193	4R00HL136924-02	4	R00	HL	136924	2		HAILU, BENYAM	1/1/18 0:00	7/31/22 0:00	NSS	10361630	1	INTERNAL MEDICINE/MEDICINE	5421136	ZUE9HKT2CLC9	5421136	ZUE9HKT2CLC9	US	41.789554	-87.601172	1413601	U OF CHICAGO		Elite	female	88	CHICAGO	IL	SCHOOLS OF MEDICINE	606372612	UNITED STATES	N	8/15/19 0:00	7/31/20 0:00	837	Non-SBIR/STTR	2019	249000	NHLBI	153704	#N/A
NCI	9700813	7/11/18 0:00	PA-15-083	4R00CA208017-03	4	R00	CA	208017	3		MCCARTHY, SUSAN A	7/11/18 0:00	6/30/21 0:00	NSS	14251601	2	INTERNAL MEDICINE/MEDICINE	168559177	G15AG3BLLMH4	168559177	G15AG3BLLMH4	US	41.265996	-96.010026	578104	U OF NEBRASKA MED CTR		Non-Elite	female	99	OMAHA	NE	SCHOOLS OF MEDICINE	681987835	UNITED STATES	N	7/11/18 0:00	6/30/19 0:00	396	Non-SBIR/STTR	2018	249000	NCI	163365	#N/A
NCI	9905686	4/15/19 0:00	PA-15-083	4R00CA190890-03	4	R00	CA	190890	3		TANDON, PUSHPA	5/1/19 0:00	4/30/22 0:00	NSS	11970218	2	Unavailable	150883460	LLLYTJ6LYD21	150883460	LLLYTJ6LYD21	US	43.637006	-72.252383	10051750	DARTMOUTH HITCHCOCK CLINIC		Elite	male	99	LEBANON	NH	Independent Hospitals	37560001	UNITED STATES	N	5/1/19 0:00	4/30/20 0:00	394	Non-SBIR/STTR	2019	249000	NCI	173587	coastal
NICHD	9085979	7/15/15 0:00	PA-11-197	4R00HD076166-02	4	R00	HD	76166	2		FREUND, LISA S	9/1/15 0:00	8/31/18 0:00	NSS	11387483	12	PSYCHOLOGY	2484665	NJ1YPQXQG7U5	2484665	NJ1YPQXQG7U5	US	40.345441	-74.655866	6661401	PRINCETON U		Elite	female	97	Princeton	NJ	SCHOOLS OF ARTS AND SCIENCES	85406000	UNITED STATES	N	9/1/15 0:00	8/31/16 0:00	865	Non-SBIR/STTR	2015	249000	NICHD	221908	#N/A
NIDCR	8848591	6/26/14 0:00	PAR-09-256	4R00DE022060-03	4	R00	DE	22060	3		LUMELSKY, NADYA L	7/1/14 0:00	6/30/19 0:00	NSS	8759178	13	DENTISTRY	621889815	QHF5ZZ114M72	621889815	QHF5ZZ114M72	US	40.8415	-73.9414	1833205	COLUMBIA U HEALTH SCI		Elite	female	97	NEW YORK	NY	SCHOOLS OF DENTISTRY/ORAL HYGN	100323725	UNITED STATES	N	7/1/14 0:00	6/30/15 0:00	121	Non-SBIR/STTR	2014	249000	NIDCR	155625	coastal
NHGRI	8520752	8/31/12 0:00	PA-11-197	4R00HG006265-02	4	R00	HG	6265	2		VOLPI, SIMONA	9/6/11 0:00	6/30/15 0:00	NSS	10602964	4	INTERNAL MEDICINE/MEDICINE	44387793	TP7EK8DZV6N5	44387793	TP7EK8DZV6N5	US	36.007766	-78.926475	2221101	DUKE U		Elite	female	98	DURHAM	NC	SCHOOLS OF MEDICINE	277054673	UNITED STATES	N	9/1/12 0:00	6/30/13 0:00	172	Non-SBIR/STTR	2012	249000	NHGRI	158599	#N/A
NCI	9835166	2/21/19 0:00	PA-15-083	4R00CA204725-03	4	R00	CA	204725	3		HILDESHEIM, JEFFREY	3/1/19 0:00	2/28/22 0:00	NSS	8470670	49	Unavailable	78731668	NNJ6BMBTFGN5	78731668	NNJ6BMBTFGN5	US	32.8863	-117.243929	7210001	SALK INST FOR BIOLOGICAL STUDIES		Non-Elite	female	98	La Jolla	CA	Research Institutes	920371002	UNITED STATES	N	3/1/19 0:00	2/29/20 0:00	396	Non-SBIR/STTR	2019	249000	NCI	165436	#N/A
NINDS	9533119	8/22/17 0:00	PA-15-083	4R00NS097618-03	4	R00	NS	97618	3		WHITTEMORE, VICKY R	9/1/17 0:00	8/31/20 0:00	NSS	11499819	5	Unavailable	79917897	GYLUH9UXHDX5	79917897	GYLUH9UXHDX5	US	36.143784	-86.800995	10040927	VANDERBILT U MED CTR		Non-Elite	male	99	NASHVILLE	TN	Independent Hospitals	372320011	UNITED STATES	N	9/1/17 0:00	8/31/18 0:00	853	Non-SBIR/STTR	2017	248972	NINDS	157577	#N/A
NHGRI	10134673	4/30/20 0:00	PA-16-193	4R00HG009917-03	4	R00	HG	9917	3		PAZIN, MICHAEL J	5/1/20 0:00	2/28/23 0:00	NSS	10711352	18	GENETICS	9214214	HJD6G4D6TJY5	9214214	HJD6G4D6TJY5	US	37.426852	-122.17047	8046501	STANFORD U		Elite	male	93	STANFORD	CA	SCHOOLS OF MEDICINE	943052004	UNITED STATES	N	5/1/20 0:00	2/28/21 0:00	172	Non-SBIR/STTR	2020	249000	NHGRI	225399	coastal
NHLBI	7651838	9/24/08 0:00		4R00HL087614-03	4	R00	HL	87614	3		EVANS, FRANK	9/25/08 0:00	7/31/11 0:00	NSS	2291272	33	RADIATION-DIAGNOSTIC/ONCOLOGY	92530369	RN64EPNH8JC6	92530369	RN64EPNH8JC6	US	34.070199	-118.45102	577505	U OF CALIFORNIA LOS ANGELES		Elite	male	99	LOS ANGELES	CA	SCHOOLS OF MEDICINE	900952000	UNITED STATES	N	9/25/08 0:00	7/31/09 0:00	837	Non-SBIR/STTR	2008	249000	NHLBI		coastal
NIGMS	8206324	1/24/11 0:00	PA-07-297	4R00GM084460-03	4	R00	GM	84460	3		PREUSCH, PETER	7/1/09 0:00	12/31/13 0:00	NSS	8296828	2	BIOCHEMISTRY	122452563	VDFYLZPJEAV6	122452563	VDFYLZPJEAV6	US	34.749005	-92.320097	1471106	U OF ARKANSAS FOR MED SCI	311	Non-Elite	male	99	LITTLE ROCK	AR	SCHOOLS OF MEDICINE	722057101	UNITED STATES	N	1/24/11 0:00	12/31/11 0:00	859	Non-SBIR/STTR	2011	249000	NIGMS		#N/A
NINR	10599490	5/27/22	PA-19-130	4R00NR019596-03	4	R00	NR	19596	3		YOON, SUNG SUG	9/24/20	7/31/25	Nursing Science Review Committee[NRRC(78)]	9844439	3	NONE	806345617	ED44Y3W6P7B9	806345617	ED44Y3W6P7B9	US	32.232844	-110.959467	490201	U OF ARIZONA		Non-Elite	female	97	TUCSON	AZ	SCHOOLS OF NURSING	857210158	UNITED STATES	N	8/1/22	7/31/23	361	Non-SBIR/STTR	2022	248997	NINR	162213	#N/A
NIDA	9118431	8/31/15 0:00	PA-11-197	4R00DA036561-02	4	R00	DA	36561	2		PARIYADATH, VANI	9/1/15 0:00	7/31/18 0:00	NSS	10380452	9	PSYCHOLOGY	620127691	XNAKYW3FTSE1	620127691	XNAKYW3FTSE1	US	40.631637	-73.952868	1605016	BROOKLYN COLL		Non-Elite	male	99	NEW YORK	NY	SCHOOLS OF ARTS AND SCIENCES	112102850	UNITED STATES	N	9/1/15 0:00	7/31/16 0:00	279	Non-SBIR/STTR	2015	249000	NIDA	191274	coastal
NCI	10139560	5/8/20 0:00	PA-16-193	4R00CA226342-03	4	R00	CA	226342	3		MAAS, STEFAN	6/1/20 0:00	5/31/23 0:00	NSS	15056131	3	RADIATION-DIAGNOSTIC/ONCOLOGY	43207562	FL6GV84CKN57	43207562	FL6GV84CKN57	US	41.310925	-72.926428	9420201	YALE U		Elite	male	73	NEW HAVEN	CT	SCHOOLS OF MEDICINE	65208327	UNITED STATES	N	6/1/20 0:00	5/31/21 0:00	396	Non-SBIR/STTR	2020	249000	NCI	152522	#N/A
NIMHD	9993691	8/19/20 0:00	PA-16-193	4R00MD012813-03	4	R00	MD	12813	3		LINARES, DEBORAH ELIZABETH	9/13/18 0:00	6/30/23 0:00	ZMD1-XLN(M1)	15028671	18	PSYCHIATRY	4514360	MKAGLD59JRL1	4514360	MKAGLD59JRL1	US	40.440909	-79.959125	2059802	U OF PITTSBURGH AT PITTSBURGH		Elite	male	99	PITTSBURGH	PA	SCHOOLS OF MEDICINE	152133320	UNITED STATES	N	9/1/20 0:00	8/31/21 0:00	307	Other Research-Related	2020	248455	NIMHD	158757	coastal
NIAID	10458292	##########	PA-18-398	4R00AI140770-03	4	R00	AI	140770	3		MALASPINA, ANGELA	9/1/19 0:00	##########	NSS	12530236	3	Unavailable	75524595	DW1XZMGNFBL4	75524595	DW1XZMGNFBL4	US	39.951288	-75.195771	9340401	WISTAR INST		Non-Elite	female	98	PHILADELPHIA	PA	Research Institutes	191044265	UNITED STATES	N	9/10/21 0:00	##########	855	Non-SBIR/STTR	2021	249000	NIAID	138568	coastal
NIGMS	9329834	9/1/16 0:00	PA-14-042	4R00GM112862-03	4	R00	GM	112862	3		BARSKI, OLEG	3/1/15 0:00	8/31/19 0:00	NSS	11167884	26	BIOCHEMISTRY	38633251	LMCJKRFW5R81	38633251	LMCJKRFW5R81	US	43.003074	-78.785924	5992614	STATE U OF NEW YORK AT BUFFALO		Non-Elite	male	99	AMHERST	NY	SCHOOLS OF MEDICINE	142282567	UNITED STATES	N	9/1/16 0:00	8/31/17 0:00	859	Non-SBIR/STTR	2016	249000	NIGMS	156113	coastal
NIDDK	9198068	4/29/16 0:00	PA-11-197	4R00DK102669-03	4	R00	DK	102669	3		PERRIN, PETER J	5/1/16 0:00	4/30/19 0:00	NSS	11971913	7	MISCELLANEOUS	1425594	E2NYLCDML6V1	1425594	E2NYLCDML6V1	US	42.359128	-71.093339	4911501	MASSACHUSETTS INST OF TECHNOLOGY		Elite	male	99	CAMBRIDGE	MA	OTHER SPECIALIZED SCHOOLS	21421029	UNITED STATES	N	5/1/16 0:00	4/30/17 0:00	847	Non-SBIR/STTR	2016	249000	NIDDK	177920	coastal
NCI	8122510	8/17/10 0:00	PA-10-063	4R00CA131552-03	4	R00	CA	131552	3		SATHYAMOORTHY, NEERAJA	9/1/10 0:00	8/31/13 0:00	NSS	8570803	3	INTERNAL MEDICINE/MEDICINE	832127323	DLWBSLWAJWR1	832127323	DLWBSLWAJWR1	US	39.999598	-83.033131	6218701	OHIO STATE U		Non-Elite	male	99	COLUMBUS	OH	SCHOOLS OF MEDICINE	432101016	UNITED STATES	N	9/1/10 0:00	8/31/11 0:00	396	Non-SBIR/STTR	2010	249000	NCI		coastal
NHLBI	8528166	8/17/12 0:00	PA-07-297	4R00HL091116-03	4	R00	HL	91116	3		CARLSON, DREW E	9/1/09 0:00	5/31/15 0:00	NSS	8840795	4	Unavailable	65937856	ELGEEPUTTZM4	65937856	ELGEEPUTTZM4	US	40.741606	-73.643311	5618301	NYU WINTHROP HOSP		Elite	female	92	MINEOLA	NY	Independent Hospitals	115013957	UNITED STATES	N	8/17/12 0:00	5/31/13 0:00	837	Non-SBIR/STTR	2012	249000	NHLBI	191946	#N/A
NIAID	7707255	4/21/09 0:00		4R00AI077800-02	4	R00	AI	77800	2		KOSHY, RAJEN	5/15/08 0:00	4/30/11 0:00	NSS	2186837	13	MICROBIOLOGY/IMMUN/VIROLOGY	78861598	C8H9CNG1VBD9	78861598	C8H9CNG1VBD9	US	40.790284	-73.946781	3839801	ICAHN SCH OF MED AT MOUNT SINAI		Non-Elite	male	100	NEW YORK	NY	SCHOOLS OF MEDICINE	100296574	UNITED STATES	N	5/1/09 0:00	4/30/10 0:00	855	Non-SBIR/STTR	2009	249000	NIAID		coastal
NCI	8786620	4/15/14 0:00	PA-11-197	4R00CA172695-02	4	R00	CA	172695	2		MENKENS, ANNE E	1/1/14 0:00	12/31/16 0:00	NSS	10718110	12	RADIATION-DIAGNOSTIC/ONCOLOGY	94878337	KMH5K9V7S518	94878337	KMH5K9V7S518	US	37.767442	-122.413937	577508	U OF CALIFORNIA SAN FRANCISCO		Elite	male	99	SAN FRANCISCO	CA	SCHOOLS OF MEDICINE	941432510	UNITED STATES	N	4/15/14 0:00	12/31/14 0:00	394	Non-SBIR/STTR	2014	241256	NCI	194142	coastal
NINDS	10304599	##########	PAR-18-814	4R00NS112417-02	4	R00	NS	112417	2		DAVID, KAREN KATE	9/1/19 0:00	##########	NSS	9715997	98	NEUROSCIENCES	49515844	TF2CMKY1HMX9	49515844	TF2CMKY1HMX9	US	38.905206	-77.07547	2869001	GEORGETOWN U		Non-Elite	female	99	WASHINGTON	DC	SCHOOLS OF MEDICINE	200570001	UNITED STATES	N	3/1/21 0:00	##########	853	Non-SBIR/STTR	2021	249000	NINDS	183128	coastal
NIAMS	8207550	2/14/11 0:00	PA-10-063	4R00AR057817-03	4	R00	AR	57817	3		BAKER, CARL	2/15/11 0:00	1/31/14 0:00	NSS	9766610	13	ANATOMY/CELL BIOLOGY	78861598	C8H9CNG1VBD9	78861598	C8H9CNG1VBD9	US	40.790284	-73.946781	3839801	ICAHN SCH OF MED AT MOUNT SINAI		Non-Elite	female	98	NEW YORK	NY	SCHOOLS OF MEDICINE	100296574	UNITED STATES	N	2/15/11 0:00	1/31/12 0:00	846	Non-SBIR/STTR	2011	249000	NIAMS		coastal
NIAMS	8897563	8/27/14 0:00	PA-11-197	4R00AR063161-03	4	R00	AR	63161	3		BAKER, CARL	9/1/14 0:00	8/31/17 0:00	NSS	9418636	13	PATHOLOGY	621889815	QHF5ZZ114M72	621889815	QHF5ZZ114M72	US	40.8415	-73.9414	1833205	COLUMBIA U HEALTH SCI		Elite	female	99	NEW YORK	NY	SCHOOLS OF MEDICINE	100323725	UNITED STATES	N	9/1/14 0:00	8/31/15 0:00	846	Non-SBIR/STTR	2014	249000	NIAMS	156824	coastal
NIMH	8299841	8/18/11 0:00	PA-09-036	4R00MH091238-03	4	R00	MH	91238	3		FRIEDMAN-HILL, STACIA	9/1/11 0:00	4/30/14 0:00	NSS	9870702	3	PSYCHIATRY	96997515	NPSNT86JKN51	96997515	NPSNT86JKN51	US	45.49882	-122.685647	6297007	OREGON HEALTH & SCI U		Non-Elite	male	99	PORTLAND	OR	SCHOOLS OF MEDICINE	972393098	UNITED STATES	N	9/1/11 0:00	4/30/12 0:00	242	Non-SBIR/STTR	2011	248964	NIMH		#N/A
NICHD	8845339	8/25/14 0:00	PA-11-197	4R00HD071966-03	4	R00	HD	71966	3		KAU, ALICE S	7/1/14 0:00	6/30/17 0:00	NSS	10786102	7	Unavailable	76593722	Z1L9F1MM1RY3	76593722	Z1L9F1MM1RY3	US	42.337481	-71.104964	1504801	BOSTON CHILDRENS HOSP		Elite	female	98	BOSTON	MA	Independent Hospitals	21155724	UNITED STATES	N	7/1/14 0:00	6/30/15 0:00	865	Non-SBIR/STTR	2014	248969	NICHD	141661	coastal
NIMH	9684728	7/27/18 0:00	PA-16-077	4R00MH109674-03	4	R00	MH	109674	3		SIMMONS, JANINE M	7/1/18 0:00	5/31/21 0:00	NSS	9172449	12	NONE	2484665	NJ1YPQXQG7U5	2484665	NJ1YPQXQG7U5	US	40.345441	-74.655866	6661401	PRINCETON U		Elite	female	96	Princeton	NJ	ORGANIZED RESEARCH UNITS	85406000	UNITED STATES	N	7/1/18 0:00	5/31/19 0:00	242	Non-SBIR/STTR	2018	249000	NIMH	177241	#N/A
NCI	9467647	4/27/17 0:00	PA-14-042	4R00CA194163-03	4	R00	CA	194163	3		HILDESHEIM, JEFFREY	5/1/17 0:00	4/30/20 0:00	NSS	11257997	12	BIOMEDICAL ENGINEERING	73133571	GNJ7BBP73WE9	73133571	GNJ7BBP73WE9	US	42.275494	-83.743038	1506502	U OF MICHIGAN AT ANN ARBOR		Elite	male	99	ANN ARBOR	MI	SCHOOLS OF MEDICINE	481091276	UNITED STATES	N	5/1/17 0:00	4/30/18 0:00	395	Non-SBIR/STTR	2017	249001	NCI	214952	#N/A
NINDS	10145455	7/16/20 0:00	PA-16-193	4R00NS102884-03	4	R00	NS	102884	3		KOENIG, JAMES I	4/15/18 0:00	3/31/23 0:00	ZNS1-SRB-L(11)	9747164	3	NEUROLOGY	47120084	TX2DAGQPENZ5	47120084	TX2DAGQPENZ5	US	38.543366	-121.72946	577503	U OF CALIFORNIA AT DAVIS		Non-Elite	female	97	DAVIS	CA	SCHOOLS OF MEDICINE	956186153	UNITED STATES	N	4/1/20 0:00	3/31/21 0:00	853	Other Research-Related	2020	231115	NINDS	149822	coastal
NCI	8122508	9/10/10 0:00	PA-09-036	4R00CA136759-03	4	R00	CA	136759	3		SATHYAMOORTHY, NEERAJA	7/1/09 0:00	8/31/13 0:00	NSS	9372328	3	ENGINEERING (ALL TYPES)	43207562	FL6GV84CKN57	43207562	FL6GV84CKN57	US	41.310925	-72.926428	9420201	YALE U		Elite	male	55	NEW HAVEN	CT	BIOMED ENGR/COL ENGR/ENGR STA	65208327	UNITED STATES	N	9/1/10 0:00	8/31/11 0:00	396	Non-SBIR/STTR	2010	240000	NCI		coastal
NHLBI	8846830	6/23/14 0:00	PA-11-197	4R00HL103792-04	4	R00	HL	103792	4		GAO, YUNLING	8/1/13 0:00	7/31/17 0:00	NSS	9972652	3	RADIATION-DIAGNOSTIC/ONCOLOGY	42250712	GM1XX56LEP58	42250712	GM1XX56LEP58	US	39.953462	-75.193983	6463801	U OF PENNSYLVANIA		Elite	male	63	PHILADELPHIA	PA	SCHOOLS OF MEDICINE	191046205	UNITED STATES	N	8/1/14 0:00	7/31/15 0:00	837	Non-SBIR/STTR	2014	249000	NHLBI	159007	coastal
NHLBI	8929458	11/7/14 0:00	PA-11-197	4R00HL114734-03	4	R00	HL	114734	3		GALIS, ZORINA S	11/7/14 0:00	10/31/17 0:00	NSS	10381440	9	Unavailable	185641052	XJUCJAYJWYV1	185641052	XJUCJAYJWYV1	US	29.707454	-95.399168	10005742	METHODIST HOSP RES INST		Non-Elite	unknown		HOUSTON	TX	Other Domestic Non-Profits	77030	UNITED STATES	N	11/7/14 0:00	10/31/15 0:00	837	Non-SBIR/STTR	2015	249000	NHLBI	156113	coastal
NIGMS	10402427	##########	PA-16-193	4R00GM123230-03	4	R00	GM	123230	3		FLICKER, PAULA F	7/1/17 0:00	##########	NSS	11732043	2	GENETICS	603847393	MQE2JHHJW9Q8	603847393	MQE2JHHJW9Q8	US	42.2802	-71.758245	850903	U OF MASSACHUSETTS MED SCH WORCESTER		Non-Elite	female	83	WORCESTER	MA	SCHOOLS OF MEDICINE	16550002	UNITED STATES	N	8/1/21 0:00	##########	859	Non-SBIR/STTR	2021	249000	NIGMS	148657	coastal
NHLBI	10154035	6/19/20 0:00	PA-16-193	4R00HL143210-03	4	R00	HL	143210	3		HUANG, LI-SHIN	7/1/20 0:00	6/30/23 0:00	NSS	14104869	52	Unavailable	804355790	UYTTZT6G9DT1	804355790	UYTTZT6G9DT1	US	32.876991	-117.24087	577507	U OF CALIFORNIA SAN DIEGO		Elite	male	52	LA JOLLA	CA	Domestic Higher Education	920930621	UNITED STATES	N	7/1/20 0:00	6/30/21 0:00	837	Non-SBIR/STTR	2020	249000	NHLBI	158095	coastal
NHLBI	8639625	4/18/13 0:00	PA-10-063	4R00HL103789-03	4	R00	HL	103789	3		LIU, LIJUAN	4/18/13 0:00	3/31/16 0:00	NSS	10182140	1	INTERNAL MEDICINE/MEDICINE	5421136	ZUE9HKT2CLC9	5421136	ZUE9HKT2CLC9	US	41.789554	-87.601172	1413601	U OF CHICAGO		Elite	male	51	CHICAGO	IL	SCHOOLS OF MEDICINE	606372612	UNITED STATES	N	4/18/13 0:00	3/31/14 0:00	837	Non-SBIR/STTR	2013	237048	NHLBI	221994	coastal
NIAAA	10112545	4/17/20 0:00	PA-16-077	4R00AA024836-03	4	R00	AA	24836	3		CHIN, HEMIN R	5/1/20 0:00	4/30/23 0:00	NSS	9709636	18	ANESTHESIOLOGY	4514360	MKAGLD59JRL1	4514360	MKAGLD59JRL1	US	40.440909	-79.959125	2059802	U OF PITTSBURGH AT PITTSBURGH		Elite	male	99	PITTSBURGH	PA	SCHOOLS OF MEDICINE	152133320	UNITED STATES	N	5/1/20 0:00	4/30/21 0:00	273	Non-SBIR/STTR	2020	221850	NIAAA	141757	#N/A
NIMH	9814980	2/27/19 0:00	PA-16-077	4R00MH109626-02	4	R00	MH	109626	2		BEER, REBECCA LYNN	11/1/18 0:00	10/31/21 0:00	NSS	14095586	9	MISCELLANEOUS	3137015	QDE5UHE5XD16	3137015	QDE5UHE5XD16	US	37.233061	-80.421005	8968001	VIRGINIA POLYTECHNIC INST AND ST U		Non-Elite	female	88	BLACKSBURG	VA	ORGANIZED RESEARCH UNITS	240616100	UNITED STATES	N	11/1/18 0:00	10/31/19 0:00	242	Non-SBIR/STTR	2019	249000	NIMH	187242	coastal
NIEHS	9208858	7/26/16 0:00	PA-11-197	4R00ES024144-03	4	R00	ES	24144	3		JOUBERT, BONNIE	8/1/16 0:00	7/31/19 0:00	NSS	10576384	37	PUBLIC HEALTH & PREV MEDICINE	72933393	G88KLJR3KYT5	72933393	G88KLJR3KYT5	US	34.017282	-118.281254	7636101	U OF SOUTHERN CALIFORNIA		Non-Elite	female	98	Los Angeles	CA	SCHOOLS OF MEDICINE	900894304	UNITED STATES	N	8/1/16 0:00	7/31/17 0:00	113	Non-SBIR/STTR	2016	248999	NIEHS	159969	coastal
NCI	10617481	7/1/22	PA-19-130	4R00CA237724-03	4	R00	CA	237724	3		WATSON, JOANNA M	7/1/22	6/30/25	Transition to Independence Study Section (I)[NCI-I]	78395198	1	GENETICS	5421136	ZUE9HKT2CLC9	5421136	ZUE9HKT2CLC9	US	41.789554	-87.601172	1413601	U OF CHICAGO		Elite	male	100	CHICAGO	IL	SCHOOLS OF MEDICINE	606372612	UNITED STATES	N	7/1/22	6/30/23	398	Non-SBIR/STTR	2022	169346	NCI	160883	#N/A
NIEHS	9091753	9/18/15 0:00	PA-11-197	4R00ES022221-03	4	R00	ES	22221	3		TYSON, FREDERICK L	9/30/15 0:00	7/31/18 0:00	NSS	10797261	5	VETERINARY SCIENCES	555917996	KABJZBBJ4B54	555917996	KABJZBBJ4B54	US	44.975143	-93.227003	1450402	U OF MINNESOTA		Non-Elite	male	99	MINNEAPOLIS	MN	EARTH SCIENCES/RESOURCES	554552070	UNITED STATES	N	9/30/15 0:00	7/31/16 0:00	113	Non-SBIR/STTR	2015	248999	NIEHS	169802	#N/A
NHLBI	10381770	##########	PA-18-398	4R00HL146948-03	4	R00	HL	146948	3		VARAGIC, JASMINA	7/1/21 0:00	##########	NSS	12382047	12	Unavailable	966668691	N4WWJC8T2593	809593387; 966668691	JJJNQAJY5RN6; N4WWJC8T2593	US	33.470962	-81.991405	676605	AUGUSTA U		Non-Elite	female	98	AUGUSTA	GA	Domestic Higher Education	309120004	UNITED STATES	N	7/1/21 0:00	##########	837	Non-SBIR/STTR	2021	249000	NHLBI	184356	#N/A
NHGRI	10405893	##########	PA-19-130	4R00HG010910-03	4	R00	HG	10910	3		CHADWICK, LISA	7/1/21 0:00	##########	NSS	14172755	9	BIOCHEMISTRY	51113330	FXKMA43NTV21	51113330	FXKMA43NTV21	US	29.70926	-95.400851	481201	BAYLOR COLL OF MED		Non-Elite	male	99	HOUSTON	TX	SCHOOLS OF MEDICINE	770303411	UNITED STATES	N	7/1/21 0:00	##########	172	Non-SBIR/STTR	2021	249000	NHGRI	155625	#N/A
NCI	8068461	5/26/10 0:00	PA-07-297	4R00CA140854-02	4	R00	CA	140854	2		MIETZ, JUDY	6/1/10 0:00	5/31/13 0:00	NSS	9481611	2	GENETICS	603847393	MQE2JHHJW9Q8	603847393	MQE2JHHJW9Q8	US	42.2802	-71.758245	850903	U OF MASSACHUSETTS MED SCH WORCESTER		Non-Elite	male	99	WORCESTER	MA	SCHOOLS OF MEDICINE	16550002	UNITED STATES	N	6/1/10 0:00	5/31/11 0:00	393	Non-SBIR/STTR	2010	248998	NCI		#N/A
NIAAA	10492153	2/15/22	PA-19-129	4R00AA027830-02	4	R00	AA	27830	2		XU, BENJAMIN	5/1/20	1/31/25	NSS	11594944	3	PSYCHOLOGY	66470972	DMQNDJDHTDG4	66470972	DMQNDJDHTDG4	US	32.602139	-85.508496	1470402	AUBURN U AT AUBURN		Non-Elite	female	98	Auburn	AL	SCHOOLS OF ARTS AND SCIENCES	368325888	UNITED STATES	N	2/15/22	1/31/23	273	Non-SBIR/STTR	2022	248999	NIAAA	164900	#N/A
NIGMS	7616609	5/15/08 0:00	PA-07-297	4R00GM080539-03	4	R00	GM	80539	3		ANDERSON, JAMES J	4/15/07 0:00	4/30/11 0:00	NSS	6063112	7	PHARMACOLOGY	98987217	W8XEAJDKMXH3	98987217	W8XEAJDKMXH3	US	41.871509	-87.667721	577703	U OF ILLINOIS AT CHICAGO		Non-Elite	male	99	Chicago	IL	SCHOOLS OF PHARMACY	606124305	UNITED STATES	N	5/16/08 0:00	4/30/09 0:00	859	Non-SBIR/STTR	2008	249000	NIGMS		#N/A
NICHD	8754821	3/14/14 0:00	PA-07-297	4R00HD057522-03	4	R00	HD	57522	3		FREUND, LISA S	4/1/14 0:00	3/31/17 0:00	NSS	8902323	8	Unavailable	73130411	FLJ7DQKLL226	73130411	FLJ7DQKLL226	US	42.363198	-71.068772	4907701	MASSACHUSETTS GENERAL HOSP		Elite	female	98	BOSTON	MA	Independent Hospitals	21142621	UNITED STATES	N	4/1/14 0:00	3/31/15 0:00	865	Non-SBIR/STTR	2014	248888	NICHD	143039	coastal
NIEHS	8043236	4/30/10 0:00	PA-09-036	4R00ES015425-03	4	R00	ES	15425	3		NADADUR, SRIKANTH	5/1/10 0:00	4/30/13 0:00	NSS	8632058	7	Unavailable	30811269	QN6MS4VN7BD1	30811269	QN6MS4VN7BD1	US	42.336107	-71.107481	1080401	BRIGHAM AND WOMENS HOSP		Elite	male	100	BOSTON	MA	Independent Hospitals	21156110	UNITED STATES	N	5/1/10 0:00	4/30/11 0:00	113	Non-SBIR/STTR	2010	249000	NIEHS		coastal
NCI	8616117	3/19/13 0:00	PA-10-063	4R00CA158581-03	4	R00	CA	158581	3		HILDESHEIM, JEFFREY	9/19/11 0:00	1/31/16 0:00	NSS	10328995	3	BIOLOGY	42250712	GM1XX56LEP58	42250712	GM1XX56LEP58	US	39.953462	-75.193983	6463801	U OF PENNSYLVANIA		Elite	male	99	PHILADELPHIA	PA	SCHOOLS OF MEDICINE	191046205	UNITED STATES	N	2/1/13 0:00	1/31/14 0:00	396	Non-SBIR/STTR	2013	234059	NCI	146287	#N/A
NIGMS	9693494	6/28/18 0:00	PA-15-083	4R00GM118909-03	4	R00	GM	118909	3		WILLIS, KRISTINE AMALEE	7/1/16 0:00	6/30/21 0:00	NSS	11351936	12	Unavailable	99992430	KH6NJ6ND8737	99992430	KH6NJ6ND8737	US	37.767618	-122.394315	1567601	J DAVID GLADSTONE INSTS		Non-Elite	male	99	SAN FRANCISCO	CA	Research Institutes	941582261	UNITED STATES	N	7/1/18 0:00	6/30/19 0:00	859	Non-SBIR/STTR	2018	249000	NIGMS	145996	coastal
NCI	8403192	3/15/12 0:00		4R00CA134743-03	4	R00	CA	134743	3		SPALHOLZ, BARBARA A	7/1/09 0:00	3/31/15 0:00	NSS	9197562	7	PHARMACOLOGY	604483045	FBYMGMHW4X95	604483045	FBYMGMHW4X95	US	42.33639	-71.07097	894901	BOSTON U MED CAMPUS		Non-Elite	female	52	BOSTON	MA	SCHOOLS OF MEDICINE	21182340	UNITED STATES	N	4/1/12 0:00	3/31/13 0:00	396	Non-SBIR/STTR	2012	233147	NCI	163339	coastal
NCI	9478399	8/29/17 0:00	PA-15-083	4R00CA201075-03	4	R00	CA	201075	3		HOWCROFT, THOMAS K	5/15/17 0:00	4/30/20 0:00	NSS	12161561	32	Unavailable	27176833	NPH1VN32EWN5	27176833	NPH1VN32EWN5	US	34.127716	-117.972442	3058203	BECKMAN RES INST/CITY OF HOPE		Non-Elite	female	67	DUARTE	CA	Research Institutes	910103012	UNITED STATES	N	5/15/17 0:00	4/30/18 0:00	396	Non-SBIR/STTR	2017	249000	NCI	188729	coastal
NIGMS	8188793	12/2/10 0:00		4R00GM081378-03	4	R00	GM	81378	3		SANTANGELO, GEORGE M	7/30/07 0:00	11/30/13 0:00	NSS	7535579	24	BIOCHEMISTRY	58889106	HYN3WD58HNN7	58889106	HYN3WD58HNN7	US	43.042595	-76.14055	5992619	UPSTATE MED U		Non-Elite	female	67	SYRACUSE	NY	SCHOOLS OF MEDICINE	132102306	UNITED STATES	N	12/3/10 0:00	11/30/11 0:00	859	Non-SBIR/STTR	2011	222220	NIGMS		coastal
NIMH	8830503	5/31/14 0:00	PA-11-197	4R00MH094405-03	4	R00	MH	94405	3		BECKEL-MITCHENER, ANDREA C	6/1/14 0:00	4/30/17 0:00	NSS	10664510	3	OTHER BASIC SCIENCES	806345617	ED44Y3W6P7B9	806345617	ED44Y3W6P7B9	US	32.232844	-110.959467	490201	U OF ARIZONA		Non-Elite	male	100	TUCSON	AZ	SCHOOLS OF MEDICINE	857210158	UNITED STATES	N	6/1/14 0:00	4/30/15 0:00	242	Non-SBIR/STTR	2014	249000	NIMH	191998	#N/A
NIDA	8246732	6/10/11 0:00		4R00DA024762-03	4	R00	DA	24762	3		POLLOCK, JONATHAN D	6/15/11 0:00	4/30/14 0:00	NSS	8387609	7	Unavailable	48682157	SZ32VTCXM799	48682157	SZ32VTCXM799	US	47.66243	-122.282291	1531401	SEATTLE CHILDRENS HOSP		Non-Elite	female	98	SEATTLE	WA	Independent Hospitals	981053901	UNITED STATES	N	6/15/11 0:00	4/30/12 0:00	279	Non-SBIR/STTR	2011	249000	NIDA		coastal
NIAAA	10479253	9/9/21 0:00	PA-19-130	4R00AA027567-03	4	R00	AA	27567	3		POWELL, ELIZABETH	##########	##########	NSS	14495457	At-Large	BIOLOGY	929930808	U9EDNSCHTBE7	929930808	U9EDNSCHTBE7	US	42.78263	-96.925433	7596201	U OF SOUTH DAKOTA	285	Non-Elite	male	100	VERMILLION	SD	SCHOOLS OF ARTS AND SCIENCES	570692307	UNITED STATES	N	9/10/21 0:00	##########	273	Non-SBIR/STTR	2021	249000	NIAAA	167021	#N/A
NIGMS	8515552	8/10/12 0:00		4R00GM106414-03	4	R00	GM	106414	3		SHEELEY, DOUGLAS	8/1/10 0:00	7/31/15 0:00	NSS	9847149	26	CHEMISTRY	71298814	Q3KCVK5S9CP1	71298814	Q3KCVK5S9CP1	US	25.761055	-80.376195	513809	FLORIDA INTERNATIONAL U		Non-Elite	male	99	MIAMI	FL	SCHOOLS OF ARTS AND SCIENCES	331992516	UNITED STATES	N	8/13/12 0:00	7/31/13 0:00	859	Non-SBIR/STTR	2012	248717	NIGMS	200379	coastal
NIMH	10432328	8/3/21 0:00	PA-18-398	4R00MH120343-03	4	R00	MH	120343	3		RANGEL GOMEZ, MAURICIO	##########	##########	NSS	15491300	23	OTHER BASIC SCIENCES	872612445	G56PUALJ3KT5	872612445	CCV3WG2JG248; D4H1NV4APKP3; ELS2M3C6V2S5; EQA8NBEN9WD5; FFAZGE9NH3M8; G56PUALJ3KT5; K6JRCJJXFET1; M8FBSLHASMT3; P4LRVQT1H4K5; PJUVN8AT5416; RT1JPM9UMGM5; ZBMGUAZYFGC4; ZMP8BDLJTUW9	US	42.438	-76.4625	1514802	CORNELL U		Elite	male	99	ITHACA	NY	SCHOOLS OF ARTS AND SCIENCES	148502820	UNITED STATES	N	8/15/21 0:00	##########	242	Non-SBIR/STTR	2021	248680	NIMH	182073	coastal
NHLBI	8307125	9/12/11 0:00	PA-10-063	4R00HL098453-02	4	R00	HL	98453	2		LAPOSKY, AARON D	9/15/11 0:00	7/31/14 0:00	NSS	9776170	3	PHYSIOLOGY	969663814	NNFQH1JAPEP3	969663814	NNFQH1JAPEP3	US	29.643443	-82.349637	513806	U OF FLORIDA		Non-Elite	male	99	GAINESVILLE	FL	SCH ALLIED HEALTH PROFESSIONS	326115500	UNITED STATES	N	9/15/11 0:00	7/31/12 0:00	837	Non-SBIR/STTR	2011	249000	NHLBI		coastal
NCI	10682655	9/13/22	PA-19-130	4R00CA252600-03	4	R00	CA	252600	3		AULT, GRACE S	9/1/22	8/31/25	Transition to Independence Study Section (I)[NCI-I]	11756641	7	PHARMACOLOGY	188435911	Z9CRZKD42ZT1	188435911	Z9CRZKD42ZT1	US	39.292248	-76.625629	820104	U OF MARYLAND BALTIMORE		Non-Elite	female	94	BALTIMORE	MD	SCHOOLS OF MEDICINE	212011508	UNITED STATES	N	9/1/22	8/31/23	398	Non-SBIR/STTR	2022	249000	NCI	161165	coastal
NIDA	9062569	7/31/15 0:00	PA-11-197	4R00DA031791-03	4	R00	DA	31791	3		SORENSEN, ROGER	8/1/15 0:00	7/31/18 0:00	NSS	9328527	6	Unavailable	937727907	SN7KD2UK7GC5	937727907	SN7KD2UK7GC5	US	36.059402	-80.321981	9021205	WAKE FOREST U HEALTH SCI		Non-Elite	male	100	WINSTON-SALEM	NC	Domestic Higher Education	271570001	UNITED STATES	N	8/1/15 0:00	7/31/16 0:00	279	Non-SBIR/STTR	2015	248543	NIDA	160350	#N/A
NIGMS	8136347	9/13/10 0:00		4R00GM087306-03	4	R00	GM	87306	3		FABIAN, MILES	4/1/09 0:00	8/31/13 0:00	NSS	9493206	12	CHEMISTRY	2484665	NJ1YPQXQG7U5	2484665	NJ1YPQXQG7U5	US	40.345441	-74.655866	6661401	PRINCETON U		Elite	female	99	Princeton	NJ	SCHOOLS OF ARTS AND SCIENCES	85406000	UNITED STATES	N	9/15/10 0:00	8/31/11 0:00	859	Non-SBIR/STTR	2010	248999	NIGMS		#N/A
NCI	8525754	9/19/12 0:00		4R00CA154887-03	4	R00	CA	154887	3		SPALHOLZ, BARBARA A	7/30/12 0:00	7/31/15 0:00	NSS	10227473	16	NONE	113645084	FFM7VPAG8P92	113645084	FFM7VPAG8P92	US	37.351306	-120.4324	10002981	U OF CALIFORNIA MERCED	291	Non-Elite	male	99	MERCED	CA	EARTH SCIENCES/RESOURCES	953435001	UNITED STATES	N	9/19/12 0:00	7/31/13 0:00	396	Non-SBIR/STTR	2012	248999	NCI	232814	#N/A
NINR	9107949	8/24/15 0:00	PA-11-197	4R00NR014369-03	4	R00	NR	14369	3		HUSS, KAREN	9/27/13 0:00	6/30/18 0:00	NSS	8722427	7	NONE	98987217	W8XEAJDKMXH3	98987217	W8XEAJDKMXH3	US	41.871509	-87.667721	577703	U OF ILLINOIS AT CHICAGO		Non-Elite	female	98	Chicago	IL	SCHOOLS OF NURSING	606124305	UNITED STATES	N	9/1/15 0:00	6/30/16 0:00	361	Non-SBIR/STTR	2015	241497	NINR	152976	#N/A
NIGMS	8616481	3/14/13 0:00	PA-10-063	4R00GM097177-03	4	R00	GM	97177	3		PREUSCH, PETER	4/5/11 0:00	2/29/16 0:00	NSS	8733025	10	Unavailable	170230239	V6AFQPN18437	170230239	V6AFQPN18437	US	30.291188	-97.737568	578403	U OF TEXAS AT AUSTIN		Non-Elite	male	91	AUSTIN	TX	Domestic Higher Education	787121139	UNITED STATES	N	3/14/13 0:00	2/28/14 0:00	859	Non-SBIR/STTR	2013	248999	NIGMS	232332	#N/A
NIMH	10156737	8/13/20 0:00	PA-18-398	4R00MH120257-02	4	R00	MH	120257	2		CHAVEZ, MARK	7/1/20 0:00	6/30/23 0:00	NSS	11964115	2	PSYCHOLOGY	41027822	EB8ASJBCFER9	41027822	EB8ASJBCFER9	US	43.711386	-72.270611	2021601	DARTMOUTH COLL		Elite	female	98	HANOVER	NH	SCHOOLS OF ARTS AND SCIENCES	37551421	UNITED STATES	N	8/14/20 0:00	6/30/21 0:00	242	Non-SBIR/STTR	2020	249000	NIMH	183411	coastal
NCI	9552294	9/12/17 0:00	PA-11-197	4R00CA181679-03	4	R00	CA	181679	3		YASSIN, RIHAB R	7/1/14 0:00	8/31/20 0:00	NSS	8866989	3	GENETICS	96997515	NPSNT86JKN51	96997515	NPSNT86JKN51	US	45.49882	-122.685647	6297007	OREGON HEALTH & SCI U		Non-Elite	male	99	PORTLAND	OR	SCHOOLS OF MEDICINE	972393098	UNITED STATES	N	9/12/17 0:00	8/31/18 0:00	396	Non-SBIR/STTR	2017	248992	NCI	161683	coastal
NICHD	9096452	8/20/15 0:00	PA-11-197	4R00HD071972-03	4	R00	HD	71972	3		MOSS, STUART B	7/1/15 0:00	6/30/18 0:00	NSS	8875706	5	BIOLOGY	790934285	NPU8ULVAAS23	790934285	NPU8ULVAAS23	US	38.992333	-76.952986	820102	U OF MARYLAND COLL PARK		Non-Elite	female	98	COLLEGE PARK	MD	EARTH SCIENCES/RESOURCES	207420001	UNITED STATES	N	7/1/15 0:00	6/30/16 0:00	865	Non-SBIR/STTR	2015	249000	NICHD	249000	#N/A
NIDA	8964511	5/7/15 0:00	PA-11-197	4R00DA033878-03	4	R00	DA	33878	3		PUROHIT, VISHNUDUTT	1/1/15 0:00	4/30/18 0:00	NSS	10885481	4	PSYCHOLOGY	608195277	D3LHU66KBLD5	608195277	D3LHU66KBLD5	US	35.9316	-79.057377	578206	U OF NORTH CAROLINA CHAPEL HILL		Elite	female	98	CHAPEL HILL	NC	SCHOOLS OF ARTS AND SCIENCES	275995023	UNITED STATES	N	5/15/15 0:00	4/30/16 0:00	279	Non-SBIR/STTR	2015	249000	NIDA	163816	coastal
NIDCD	8139405	9/13/10 0:00	PA-10-063	4R00DC009459-03	4	R00	DC	9459	3		SKLARE, DAN	9/15/10 0:00	8/30/13 0:00	NSS	9122697	12	OTOLARYNGOLOGY	121911077	M5SZJ6VHUHN8	121911077	M5SZJ6VHUHN8	US	40.669895	-73.974354	5998304	NEW YORK U SCH OF MED		Elite	male	100	NEW YORK	NY	SCHOOLS OF MEDICINE	10016	UNITED STATES	N	9/15/10 0:00	8/31/11 0:00	173	Non-SBIR/STTR	2010	248966	NIDCD		#N/A
NIAID	10654093	8/10/22	PA-19-130	4R00AI153465-03	4	R00	AI	153465	3		KOSHY, RAJEN	7/6/20	7/31/24	ZAI1-SRC(99)	11955511	23	MICROBIOLOGY/IMMUN/VIROLOGY	872612445	G56PUALJ3KT5	872612445	CCV3WG2JG248; D4H1NV4APKP3; ELS2M3C6V2S5; EQA8NBEN9WD5; FFAZGE9NH3M8; G56PUALJ3KT5; K6JRCJJXFET1; M8FBSLHASMT3; P4LRVQT1H4K5; PJUVN8AT5416; RT1JPM9UMGM5; ZBMGUAZYFGC4; ZMP8BDLJTUW9	US	42.438	-76.4625	1514802	CORNELL U		Elite	male	99	ITHACA	NY	SCHOOLS OF VETERINARY MEDICINE	148502820	UNITED STATES	N	8/10/22	7/31/23	855	Non-SBIR/STTR	2022	249000	NIAID	187385	coastal
NCI	8676034	6/24/13 0:00	PA-11-197	4R00CA166729-02	4	R00	CA	166729	2		MIETZ, JUDY	8/8/12 0:00	5/31/16 0:00	NSS	9289180	7	Unavailable	604483045	FBYMGMHW4X95	604483045	FBYMGMHW4X95	US	42.33639	-71.07097	894901	BOSTON U MED CAMPUS		Non-Elite	female	98	BOSTON	MA	Domestic Higher Education	21182340	UNITED STATES	N	6/1/13 0:00	5/31/14 0:00	393	Non-SBIR/STTR	2013	233852	NCI	142854	coastal
NHLBI	9416185	2/27/17 0:00	PA-11-197	4R00HL121079-03	4	R00	HL	121079	3		LUNDBERG, MARTHA	3/1/17 0:00	2/29/20 0:00	NSS	11685151	6	Unavailable	153665211	ULMJJBL7ZXX3	153665211	ULMJJBL7ZXX3	US	33.589113	-111.79394	4976104	MAYO CLINIC ARIZONA		Non-Elite	male	100	SCOTTSDALE	AZ	Other Domestic Non-Profits	852595499	UNITED STATES	N	3/1/17 0:00	2/28/18 0:00	837	Non-SBIR/STTR	2017	249000	NHLBI	150542	coastal
NEI	10528014	5/19/22	PA-16-193	4R00EY029326-03	4	R00	EY	29326	3		ARAJ, HOUMAM H	6/1/22	5/31/25	NSS	12422615	5	ENGINEERING (ALL TYPES)	97394084	EMW9FC8J3HN4	97394084	EMW9FC8J3HN4	US	33.781897	-84.404009	676603	GEORGIA INST OF TECHNOLOGY		Non-Elite	male	73	ATLANTA	GA	BIOMED ENGR/COL ENGR/ENGR STA	303320415	UNITED STATES	N	6/1/22	5/31/23	867	Non-SBIR/STTR	2022	249000	NEI	205221	coastal
NCI	9394884	2/27/17 0:00	PA-14-042	4R00CA191152-03	4	R00	CA	191152	3		FINGERMAN, IAN M	3/1/17 0:00	2/29/20 0:00	NSS	10888946	2	Unavailable	64367329	FF1XVJMDYVR1	64367329	FF1XVJMDYVR1	US	40.067891	-75.091086	1190002	RES INST OF FOX CHASE CAN CTR		Non-Elite	male	59	PHILADELPHIA	PA	Research Institutes	191112434	UNITED STATES	N	3/1/17 0:00	2/28/18 0:00	393	Non-SBIR/STTR	2017	249000	NCI	136066	#N/A
NIDA	8207551	3/10/11 0:00	PA-07-297	4R00DA026417-03	4	R00	DA	26417	3		SORENSEN, ROGER	4/1/11 0:00	3/31/14 0:00	NSS	9476723	11	PHYSIOLOGY	77758407	HJMKEF7EJW69	77758407	HJMKEF7EJW69	US	41.502739	-81.607334	218601	CASE WESTERN RESERVE U		Non-Elite	male	99	CLEVELAND	OH	SCHOOLS OF MEDICINE	441061712	UNITED STATES	N	4/1/11 0:00	3/31/12 0:00	279	Non-SBIR/STTR	2011	249000	NIDA		coastal
NIGMS	9011088	2/24/15 0:00	PA-11-197	4R00GM099848-03	4	R00	GM	99848	3		SLEDJESKI, DARREN D	9/15/12 0:00	12/31/17 0:00	NSS	8945082	18	GENETICS	9214214	HJD6G4D6TJY5	9214214	HJD6G4D6TJY5	US	37.426852	-122.17047	8046501	STANFORD U		Elite	female	92	STANFORD	CA	SCHOOLS OF MEDICINE	943052004	UNITED STATES	N	3/1/15 0:00	12/31/15 0:00	859	Non-SBIR/STTR	2015	249000	NIGMS	170218	coastal
NIMH	9245117	6/20/16 0:00	PA-11-197	4R00MH103479-03	4	R00	MH	103479	3		BUHRING, BETTINA D	6/20/16 0:00	5/31/19 0:00	NSS	11673015	9	NEUROSURGERY	51113330	FXKMA43NTV21	51113330	FXKMA43NTV21	US	29.70926	-95.400851	481201	BAYLOR COLL OF MED		Non-Elite	male	98	HOUSTON	TX	SCHOOLS OF MEDICINE	770303411	UNITED STATES	N	6/20/16 0:00	5/31/17 0:00	242	Non-SBIR/STTR	2016	249625	NIMH	161552	coastal
NIAMS	9145344	9/19/15 0:00	PA-11-197	4R00AR066110-02	4	R00	AR	66110	2		CHEN, FAYE H	9/21/15 0:00	7/31/18 0:00	NSS	11803698	3	NONE	832127323	DLWBSLWAJWR1	832127323	DLWBSLWAJWR1	US	39.999598	-83.033131	6218701	OHIO STATE U		Non-Elite	male	99	COLUMBUS	OH	SCHOOLS OF DENTISTRY/ORAL HYGN	432101016	UNITED STATES	N	9/21/15 0:00	7/31/16 0:00	846	Non-SBIR/STTR	2015	249000	NIAMS	172208	coastal
NEI	10522059	1/20/22	PA-18-398	4R00EY029373-03	4	R00	EY	29373	3		GORDIYENKO, NATALIYA	9/1/19	1/31/25	NSS	14910813	2	PHARMACOLOGY	122452563	VDFYLZPJEAV6	122452563	VDFYLZPJEAV6	US	34.749005	-92.320097	1471106	U OF ARKANSAS FOR MED SCI		Non-Elite	male	99	LITTLE ROCK	AR	SCHOOLS OF MEDICINE	722057101	UNITED STATES	N	2/1/22	1/31/23	867	Non-SBIR/STTR	2022	249000	NEI	163816	coastal
NIEHS	9819828	1/18/19 0:00	PA-15-083	4R00ES027028-03	4	R00	ES	27028	3		HEACOCK, MICHELLE	2/1/19 0:00	1/31/22 0:00	NSS	12280245	3	BIOCHEMISTRY	53284659	R8JEVL4ULGB7	53284659	R8JEVL4ULGB7	US	39.948207	-75.157825	4050801	THOMAS JEFFERSON U		Non-Elite	female	97	PHILADELPHIA	PA	SCHOOLS OF MEDICINE	191074418	UNITED STATES	N	2/1/19 0:00	1/31/20 0:00	113	Non-SBIR/STTR	2019	249000	NIEHS	164462	#N/A
NIDA	8825569	7/14/14 0:00	PA-11-197	4R00DA032543-03	4	R00	DA	32543	3		SORENSEN, ROGER	8/1/14 0:00	7/31/17 0:00	NSS	6699960	45	OTHER BASIC SCIENCES	46705849	MJC5FCYQTPE6	46705849	MJC5FCYQTPE6	US	33.64852	-117.82136	577504	U OF CALIFORNIA IRVINE		Non-Elite	female	95	IRVINE	CA	SCHOOLS OF ARTS AND SCIENCES	926970001	UNITED STATES	N	8/1/14 0:00	7/31/15 0:00	279	Non-SBIR/STTR	2014	249000	NIDA	193266	coastal
NIDA	10503495	12/16/21	PA-19-130	4R00DA050575-03	4	R00	DA	50575	3		NAIR, SUNILA GOPI	4/1/20	11/30/24	ZDA1-SXM-M(03)S	14873313	10	ANESTHESIOLOGY	129348186	TNKGNDAWB445	129348186	TNKGNDAWB445	US	40.264414	-76.674014	1524204	PENNSYLVANIA STATE		Non-Elite	female	99	HERSHEY	PA	SCHOOLS OF MEDICINE	170332360	UNITED STATES	N	12/1/21	11/30/22	279	Non-SBIR/STTR	2022	248999	NIDA	197052	#N/A
NIMH	10591687	8/8/22	PA-19-130	4R00MH123673-02	4	R00	MH	123673	2		VICENTIC, ALEKSANDRA	7/1/22	5/31/25	NSS	11994340	6	OTHER BASIC SCIENCES	41387846	J22LNTMEDP73	41387846	J22LNTMEDP73	US	33.999623	-81.028249	1524302	U OF SOUTH CAROLINA AT COLUMBIA		Non-Elite	male	97	COLUMBIA	SC	SCHOOLS OF MEDICINE	292080001	UNITED STATES	N	8/9/22	5/31/23	242	Non-SBIR/STTR	2022	249000	NIMH	217495	#N/A
NCI	9405057	2/17/17 0:00	PA-15-083	4R00CA204628-02	4	R00	CA	204628	2		SATHYAMOORTHY, NEERAJA	2/17/17 0:00	1/31/20 0:00	NSS	10816926	4	GENETICS	608195277	D3LHU66KBLD5	608195277	D3LHU66KBLD5	US	35.9316	-79.057377	578206	U OF NORTH CAROLINA CHAPEL HILL		Elite	male	99	CHAPEL HILL	NC	SCHOOLS OF MEDICINE	275995023	UNITED STATES	N	2/17/17 0:00	1/31/18 0:00	396	Non-SBIR/STTR	2017	248988	NCI	163808	#N/A
NINDS	8012026	2/19/10 0:00	PA-09-036	4R00NS062738-03	4	R00	NS	62738	3		TALLEY, EDMUND M	7/15/08 0:00	2/28/13 0:00	NSS	2110428	2	ANATOMY/CELL BIOLOGY	62761671	Z1H9VJS8NG16	62761671	Z1H9VJS8NG16	US	41.664405	-91.542152	3972901	U OF IOWA		Non-Elite	male	98	IOWA CITY	IA	SCHOOLS OF MEDICINE	522421320	UNITED STATES	N	3/1/10 0:00	2/28/11 0:00	853	Non-SBIR/STTR	2010	248999	NINDS		coastal
NEI	10661306	8/29/22	PA-19-130	4R00EY031795-03	4	R00	EY	31795	3		FLANDERS, MARTHA C	9/30/20	6/30/25	NSS	16072340	1	NEUROSCIENCES	68552207	L6NFUM28LQM5	68552207	L6NFUM28LQM5	US	38.664368	-90.323797	9083901	WASHINGTON U		Non-Elite	male	99	SAINT LOUIS	MO	SCHOOLS OF MEDICINE	631304862	UNITED STATES	N	9/1/22	6/30/23	867	Non-SBIR/STTR	2022	249378	NEI	185497	#N/A
NHLBI	8528045	8/22/12 0:00		4R00HL107674-03	4	R00	HL	107674	3		CARLSON, DREW E	4/1/11 0:00	5/31/15 0:00	NSS	8969790	2	INTERNAL MEDICINE/MEDICINE	9095365	LL8GLEVH6MG3	9095365	LL8GLEVH6MG3	US	40.764542	-111.850317	514002	U OF UTAH		Non-Elite	female	98	SALT LAKE CITY	UT	SCHOOLS OF MEDICINE	841128906	UNITED STATES	N	8/22/12 0:00	5/31/13 0:00	837	Non-SBIR/STTR	2012	249000	NHLBI	166555	coastal
NIDCD	8508487	7/27/12 0:00	PA-11-197	4R00DC009839-03	4	R00	DC	9839	3		SKLARE, DAN	9/1/12 0:00	8/31/15 0:00	NSS	9365345	4	NEUROSCIENCES	44387793	TP7EK8DZV6N5	44387793	TP7EK8DZV6N5	US	36.007766	-78.926475	2221101	DUKE U		Elite	male	99	DURHAM	NC	SCHOOLS OF MEDICINE	277054673	UNITED STATES	N	9/1/12 0:00	8/31/13 0:00	173	Non-SBIR/STTR	2012	249000	NIDCD	184013	coastal
NIGMS	8993954	2/5/15 0:00	PA-11-197	4R00GM097033-03	4	R00	GM	97033	3		SLEDJESKI, DARREN D	9/20/13 0:00	1/31/18 0:00	NSS	10291948	12	BIOCHEMISTRY	73133571	GNJ7BBP73WE9	73133571	GNJ7BBP73WE9	US	42.275494	-83.743038	1506502	U OF MICHIGAN AT ANN ARBOR		Elite	male	99	ANN ARBOR	MI	SCHOOLS OF MEDICINE	481091276	UNITED STATES	N	2/5/15 0:00	1/31/16 0:00	859	Non-SBIR/STTR	2015	248717	NIGMS	165960	#N/A
NHLBI	9092595	8/20/15 0:00	PA-11-197	4R00HL119587-03	4	R00	HL	119587	3		CARLSON, DREW E	8/1/13 0:00	7/31/18 0:00	NSS	10564907	20	OTHER BASIC SCIENCES	190592162	G6VVMPNK4Y48	190592162	G6VVMPNK4Y48	US	42.652632	-73.77526	8455007	ALBANY MED COLL		Non-Elite	female	97	ALBANY	NY	SCHOOLS OF MEDICINE	122083479	UNITED STATES	N	8/21/15 0:00	7/31/16 0:00	837	Non-SBIR/STTR	2015	249000	NHLBI	157595	#N/A
NIDCR	9076616	7/20/15 0:00	PAR-12-283	4R00DE023584-03	4	R00	DE	23584	3		MELILLO, AMANDA A	7/1/13 0:00	7/31/20 0:00	NSS	11252997	7	Unavailable	62190616	MZ9DFVC2J1B7	62190616	MZ9DFVC2J1B7	US	42.363539	-71.078724	2705601	FORSYTH INST		Elite	male	100	CAMBRIDGE	MA	Research Institutes	21421200	UNITED STATES	N	8/1/15 0:00	7/31/16 0:00	121	Non-SBIR/STTR	2015	238332	NIDCR	128550	coastal
NIDDK	8844133	8/15/14 0:00	PA-11-197	4R00DK093711-03	4	R00	DK	93711	3		HOSHIZAKI, DEBORAH K	7/15/12 0:00	6/30/17 0:00	NSS	10218218	3	Unavailable	43207562	FL6GV84CKN57	43207562	FL6GV84CKN57	US	41.310925	-72.926428	9420201	YALE U		Elite	female	70	NEW HAVEN	CT	Domestic Higher Education	65208327	UNITED STATES	N	8/15/14 0:00	6/30/15 0:00	847	Non-SBIR/STTR	2014	248999	NIDDK	149549	#N/A
NIEHS	9131846	9/2/15 0:00	PA-11-197	4R00ES024431-02	4	R00	ES	24431	2		HEACOCK, MICHELLE	9/30/15 0:00	8/31/18 0:00	NSS	11943680	3	BIOCHEMISTRY	16060860	YXJGGNC5J269	16060860	YXJGGNC5J269	US	39.026584	-94.636347	1484303	U OF KANSAS MED CTR		Non-Elite	male	98	KANSAS CITY	KS	SCHOOLS OF MEDICINE	661608500	UNITED STATES	N	9/30/15 0:00	8/31/16 0:00	113	Non-SBIR/STTR	2015	249000	NIEHS	184249	coastal
NIDCR	8182154	2/1/11 0:00		4R00DE019678-03	4	R00	DE	19678	3		VENKATACHALAM, SUNDARESAN	2/1/11 0:00	1/31/14 0:00	NSS	7344599	13	PEDIATRICS	1962224	M6K6NTJ2MNE5	1962224	M6K6NTJ2MNE5	US	42.357466	-83.065294	9110501	WAYNE STATE U		Non-Elite	male	99	DETROIT	MI	SCHOOLS OF MEDICINE	482024000	UNITED STATES	N	2/1/11 0:00	1/31/12 0:00	121	Non-SBIR/STTR	2011	249000	NIDCR		coastal
NHLBI	9606265	12/16/17 0:00	PA-15-083	4R00HL133372-03	4	R00	HL	133372	3		WONG, RENEE P	9/1/16 0:00	12/31/20 0:00	NSS	14176311	30	ANATOMY/CELL BIOLOGY	800771545	YZJ6DKPM4W63	800771545	YZJ6DKPM4W63	US	32.811963	-96.837534	578404	UT SOUTHWESTERN MED CTR		Non-Elite	male	99	DALLAS	TX	SCHOOLS OF MEDICINE	753909105	UNITED STATES	N	1/1/18 0:00	12/31/18 0:00	837	Non-SBIR/STTR	2018	248999	NHLBI	182407	#N/A
NINR	8071293	7/2/10 0:00	PA-10-063	4R00NR010750-03	4	R00	NR	10750	3		HUSS, KAREN	7/2/10 0:00	6/30/13 0:00	NSS	8580660	12	NONE	73133571	GNJ7BBP73WE9	73133571	GNJ7BBP73WE9	US	42.275494	-83.743038	1506502	U OF MICHIGAN AT ANN ARBOR		Elite	male	99	ANN ARBOR	MI	SCHOOLS OF NURSING	481091276	UNITED STATES	N	7/2/10 0:00	6/30/11 0:00	361	Non-SBIR/STTR	2010	246189	NINR		#N/A
NINR	8499499	7/19/12 0:00	PA-11-197	4R00NR012219-03	4	R00	NR	12219	3		ROOF, REBECCA	7/22/10 0:00	6/30/15 0:00	NSS	8305799	7	OTHER HEALTH PROFESSIONS	98987217	W8XEAJDKMXH3	98987217	W8XEAJDKMXH3	US	41.871509	-87.667721	577703	U OF ILLINOIS AT CHICAGO		Non-Elite	female	98	Chicago	IL	SCHOOLS OF NURSING	606124305	UNITED STATES	N	7/23/12 0:00	6/30/13 0:00	361	Non-SBIR/STTR	2012	248999	NINR	156112	#N/A
NIDCD	8043964	6/15/10 0:00	PA-06-133	4R00DC009635-03	4	R00	DC	9635	3		SKLARE, DAN	7/9/08 0:00	5/31/13 0:00	Communication Disorders Review Committee[CDRC]	6292740	12	OTOLARYNGOLOGY	121911077	M5SZJ6VHUHN8	121911077	M5SZJ6VHUHN8	US	40.669895	-73.974354	5998304	NEW YORK U SCH OF MED		Elite	male	99	NEW YORK	NY	SCHOOLS OF MEDICINE	10016	UNITED STATES	N	6/15/10 0:00	5/31/11 0:00	173	Non-SBIR/STTR	2010	248999	NIDCD		#N/A
NINDS	9173275	12/4/15 0:00	PA-11-197	4R00NS088429-03	4	R00	NS	88429	3		CORRIVEAU, RODERICK A	12/15/15 0:00	11/30/18 0:00	NSS	8443526	21	ANATOMY/CELL BIOLOGY	800772162	C3KXNLTAAY98	800772162	C3KXNLTAAY98	US	29.513091	-98.577742	578418	U OF TEXAS HLTH SCI CTR		Non-Elite	female	64	SAN ANTONIO	TX	SCHOOLS OF MEDICINE	782293901	UNITED STATES	N	12/15/15 0:00	11/30/16 0:00	853	Non-SBIR/STTR	2016	249000	NINDS	163279	coastal
NHGRI	9119200	9/16/15 0:00	PA-11-197	4R00HG007368-02	4	R00	HG	7368	2		GOOD, PETER J	9/22/15 0:00	6/30/18 0:00	NSS	11260773	1	BIOSTATISTICS & OTHER MATH SCI	75746271	QWYKRJH5NNJ3	75746271	QWYKRJH5NNJ3	US	46.730287	-116.996847	3543501	U OF IDAHO	464	Non-Elite	female	97	MOSCOW	ID	SCHOOLS OF ARTS AND SCIENCES	838443020	UNITED STATES	N	9/22/15 0:00	6/30/16 0:00	172	Non-SBIR/STTR	2015	248993	NHGRI	174744	coastal
NIMH	9034261	5/15/15 0:00	PA-11-197	4R00MH099243-03	4	R00	MH	99243	3		DESMOND, NANCY L	9/20/12 0:00	1/31/18 0:00	NSS	6730160	3	NEUROSCIENCES	42250712	GM1XX56LEP58	42250712	GM1XX56LEP58	US	39.953462	-75.193983	6463801	U OF PENNSYLVANIA		Elite	male	99	PHILADELPHIA	PA	SCHOOLS OF MEDICINE	191046205	UNITED STATES	N	5/15/15 0:00	1/31/16 0:00	242	Non-SBIR/STTR	2015	249000	NIMH	178125	coastal
NHLBI	7695081	12/24/08 0:00	PA-07-297	4R00HL088000-04	4	R00	HL	88000	4		COLOMBINI-HATCH, SANDRA	12/1/06 0:00	12/31/11 0:00	NSS	8635189	28	Unavailable	75307785	NCSMA19DF7E6	75307785	NCSMA19DF7E6	US	34.076544	-118.380004	1225501	CEDARS SINAI MED CTR		Non-Elite	male	98	LOS ANGELES	CA	Independent Hospitals	900481804	UNITED STATES	N	1/1/09 0:00	12/31/09 0:00	838	Non-SBIR/STTR	2009	249000	NHLBI		coastal
NIDDK	7887021	8/27/09 0:00	PA-06-133	4R00DK078732-03	4	R00	DK	78732	3		SATO, SHERYL M	9/1/07 0:00	7/31/12 0:00	NSS	8780426	7	PEDIATRICS	603007902	SHHBRBAPSM35	603007902; 625168166	DKNHLK3NBPH7; DL9MTNNKWYR9; GY8GKRUWM7D5; HA48EWMJFV47; HCNBFNDANNV5; HCRDU7BNPZ13; HCWTYJ7KQ4U6; HEBLAL94JHP7; NKCRSKVJBXE3; SHHBRBAPSM35; TA1NYNZ27LQ7; WJJRCLJ936C8; X51WYC1QEPD7; XNBJV454V2W1; YCJNP5NJYCY1; YW8WNKKANDR9	US	39.779213	-86.175288	577806	INDIANA U PURDUE U AT INDIANAPOLIS		Non-Elite	male	99	INDIANAPOLIS	IN	SCHOOLS OF MEDICINE	462022915	UNITED STATES	N	8/26/09 0:00	7/31/10 0:00	847	Non-SBIR/STTR	2009	249000	NIDDK		coastal
NIAID	7641627	7/9/08 0:00	PA-06-133	4R00AI072834-02	4	R00	AI	72834	2		PERDUE, SAMUEL S	6/1/07 0:00	6/30/10 0:00	NSS	8627985	12	PHARMACOLOGY	94878337	KMH5K9V7S518	94878337	KMH5K9V7S518	US	37.767442	-122.413937	577508	U OF CALIFORNIA SAN FRANCISCO		Elite	female	99	SAN FRANCISCO	CA	SCHOOLS OF MEDICINE	941432510	UNITED STATES	N	7/9/08 0:00	6/30/09 0:00	855	Non-SBIR/STTR	2008	249000	NIAID		#N/A
NIAAA	8326357	4/17/12 0:00	PA-11-197	4R00AA019699-03	4	R00	AA	19699	3		GODETTE, DIONNE	9/15/10 0:00	3/31/15 0:00	NSS	9347892	9	PSYCHOLOGY	800771594	ZUFBNVZ587D4	800771594	ZUFBNVZ587D4	US	29.703025	-95.403303	578417	U OF TEXAS HLTH SCI CTR HOUSTON		Non-Elite	male	79	HOUSTON	TX	SCHOOLS OF PUBLIC HEALTH	770305400	UNITED STATES	N	4/20/12 0:00	3/31/13 0:00	273	Non-SBIR/STTR	2012	175037	NIAAA	115156	coastal
NHLBI	8803857	4/8/14 0:00	PA-10-063	4R00HL108743-03	4	R00	HL	108743	3		KIRBY, RUTH	4/8/14 0:00	3/31/17 0:00	NSS	10520492	3	OTHER HEALTH PROFESSIONS	832127323	DLWBSLWAJWR1	832127323	DLWBSLWAJWR1	US	39.999598	-83.033131	6218701	OHIO STATE U		Non-Elite	male	100	COLUMBUS	OH	SCHOOLS OF MEDICINE	432101016	UNITED STATES	N	4/8/14 0:00	3/31/15 0:00	837	Non-SBIR/STTR	2014	249000	NHLBI	186328	coastal
NIA	9952507	7/25/19 0:00	PA-15-083	4R00AG053412-03	4	R00	AG	53412	3		MACKIEWICZ, MIROSLAW	8/1/19 0:00	5/31/22 0:00	NSS	11896062	12	BIOLOGY	66300096	JB33DT84JNA5	66300096	JB33DT84JNA5	US	35.301652	-80.731452	578202	U OF NORTH CAROLINA CHARLOTTE	852	Non-Elite	female	97	CHARLOTTE	NC	SCHOOLS OF ARTS AND SCIENCES	282230001	UNITED STATES	N	8/1/19 0:00	5/31/20 0:00	866	Non-SBIR/STTR	2019	248641	NIA	164663	#N/A
NIEHS	10238415	8/31/20 0:00	PA-16-193	4R00ES028743-03	4	R00	ES	28743	3		GRAY, KIMBERLY A	9/1/20 0:00	8/31/23 0:00	NSS	11930656	3	PUBLIC HEALTH & PREV MEDICINE	806345617	ED44Y3W6P7B9	806345617	ED44Y3W6P7B9	US	32.232844	-110.959467	490201	U OF ARIZONA		Non-Elite	female	98	TUCSON	AZ	SCHOOLS OF PUBLIC HEALTH	857210158	UNITED STATES	N	9/1/20 0:00	8/31/21 0:00	113	Non-SBIR/STTR	2020	248998	NIEHS	162214	#N/A
NIGMS	9323076	9/9/16 0:00	PA-14-042	4R00GM114296-02	4	R00	GM	114296	2		SLEDJESKI, DARREN D	9/1/15 0:00	7/31/19 0:00	NSS	10925612	7	BIOLOGY	49435266	THL6A6JLE1S7	49435266	THL6A6JLE1S7	US	42.349594	-71.099726	10001093	BOSTON U (CHARLES RIVER CAMPUS)		Non-Elite	male	95	BOSTON	MA	SCHOOLS OF ARTS AND SCIENCES	22151390	UNITED STATES	N	9/15/16 0:00	7/31/17 0:00	859	Non-SBIR/STTR	2016	248995	NIGMS	151365	coastal
NINDS	10190359	8/27/20 0:00	PA-16-193	4R00NS102520-03	4	R00	NS	102520	3		CHEN, DAOFEN	9/1/20 0:00	8/31/23 0:00	NST-2 Study Section [NST-2]	11895843	13	NEUROSCIENCES	621889815	QHF5ZZ114M72	621889815	QHF5ZZ114M72	US	40.8415	-73.9414	1833205	COLUMBIA U HEALTH SCI		Elite	male	100	NEW YORK	NY	SCHOOLS OF MEDICINE	100323725	UNITED STATES	N	9/1/20 0:00	8/31/21 0:00	853	Other Research-Related	2020	249000	NINDS	216188	#N/A
NIEHS	8960969	12/19/14 0:00	PA-11-197	4R00ES022640-03	4	R00	ES	22640	3		REINLIB, LESLIE J	1/1/15 0:00	12/31/17 0:00	NSS	10928862	5	NONE	41485301	XRJSGX384TD6	41485301	XRJSGX384TD6	US	46.728892	-117.155742	9082001	WASHINGTON STATE U		Non-Elite	male	97	PULLMAN	WA	SCHOOLS OF PHARMACY	991641060	UNITED STATES	N	1/1/15 0:00	12/31/15 0:00	113	Non-SBIR/STTR	2015	249000	NIEHS	200092	#N/A
NCI	8079358	8/25/10 0:00	PA-09-036	4R00CA131477-03	4	R00	CA	131477	3		BLAIR, DONALD G	9/1/08 0:00	8/31/13 0:00	NSS	8857793	10	PUBLIC HEALTH & PREV MEDICINE	129348186	TNKGNDAWB445	129348186	TNKGNDAWB445	US	40.264414	-76.674014	1524204	PENNSYLVANIA STATE		Non-Elite	female	98	HERSHEY	PA	SCHOOLS OF MEDICINE	170332360	UNITED STATES	N	9/1/10 0:00	8/31/11 0:00	393	Non-SBIR/STTR	2010	246669	NCI		#N/A
NHLBI	9416186	2/27/17 0:00	PA-11-197	4R00HL121287-03	4	R00	HL	121287	3		REID, DIANE M	8/1/14 0:00	2/29/20 0:00	NSS	10543864	7	GENETICS	1910777	FTMTDMBR29C7	1910777	FTMTDMBR29C7	US	39.325256	-76.605131	4134401	JOHNS HOPKINS U		Elite	male	100	BALTIMORE	MD	SCHOOLS OF MEDICINE	212182680	UNITED STATES	N	3/1/17 0:00	2/28/18 0:00	837	Non-SBIR/STTR	2017	249000	NHLBI	162015	#N/A
NICHD	8574158	2/4/13 0:00	PA-10-063	4R00HD069533-03	4	R00	HD	69533	3		JAVOIS, LORETTE CLAIRE	12/10/12 0:00	12/9/15 0:00	Developmental Biology Study Section[CHHD-C]	6431500	8	Unavailable	73130411	FLJ7DQKLL226	73130411	FLJ7DQKLL226	US	42.363198	-71.068772	4907701	MASSACHUSETTS GENERAL HOSP		Elite	female	98	BOSTON	MA	Independent Hospitals	21142621	UNITED STATES	N	12/10/12 0:00	12/9/13 0:00	865	Non-SBIR/STTR	2013	249000	NICHD	156663	coastal
NCI	8114450	9/3/10 0:00	PA-06-133	4R00CA126161-03	4	R00	CA	126161	3		SPALHOLZ, BARBARA A	9/3/10 0:00	8/31/13 0:00	NSS	8586925	6	BIOCHEMISTRY	939017877	H1HYA8Z1NTM5	939017877	H1HYA8Z1NTM5	US	38.040959	-84.505885	2793601	U OF KENTUCKY		Non-Elite	female	98	LEXINGTON	KY	SCHOOLS OF MEDICINE	405260001	UNITED STATES	N	9/3/10 0:00	8/31/11 0:00	396	Non-SBIR/STTR	2010	249000	NCI		#N/A
NCI	9148274	9/26/15 0:00	PA-11-197	4R00CA178190-03	4	R00	CA	178190	3		ESPEY, MICHAEL G	9/30/15 0:00	8/31/18 0:00	NSS	11517583	5	ANATOMY/CELL BIOLOGY	965717143	GTNBNWXJ12D5	965717143	DWH7MSXKA2A8; GTNBNWXJ12D5	US	36.143381	-86.803365	8721001	VANDERBILT U		Non-Elite	female	93	Nashville	TN	SCHOOLS OF MEDICINE	372032408	UNITED STATES	N	9/30/15 0:00	8/31/16 0:00	398	Non-SBIR/STTR	2015	249000	NCI	160777	coastal
NIGMS	7897077	9/7/09 0:00	PA-07-297	4R00GM086683-02	4	R00	GM	86683	2		TOMPKINS, LAURIE	12/1/08 0:00	8/31/12 0:00	NSS	7077038	7	PSYCHIATRY	63690705	YND4PLMC9AN7	63690705	YND4PLMC9AN7	US	33.50591	-86.799772	1288803	U OF ALABAMA AT BIRMINGHAM		Non-Elite	female	96	BIRMINGHAM	AL	SCHOOLS OF MEDICINE	352940001	UNITED STATES	N	9/7/09 0:00	8/31/10 0:00	859	Non-SBIR/STTR	2009	248979	NIGMS		#N/A
NCI	9839710	1/8/19 0:00	PA-15-083	4R00CA207867-03	4	R00	CA	207867	3		YASSIN, RIHAB R	12/1/18 0:00	11/30/21 0:00	NSS	11811460	1	BIOCHEMISTRY	183710748	NHV3GTWSALA7	183710748	NHV3GTWSALA7	US	32.786754	-79.947265	7575301	MED U OF SOUTH CAROLINA		Non-Elite	male	100	CHARLESTON	SC	SCHOOLS OF MEDICINE	294074636	UNITED STATES	N	12/1/18 0:00	11/30/19 0:00	396	Non-SBIR/STTR	2019	249000	NCI	166555	coastal
NCI	8722136	8/27/13 0:00	PA-10-063	4R00CA154531-03	4	R00	CA	154531	3		WATSON, JOANNA M	8/16/11 0:00	8/31/16 0:00	NSS	8831758	7	PHARMACOLOGY	604483045	FBYMGMHW4X95	604483045	FBYMGMHW4X95	US	42.33639	-71.07097	894901	BOSTON U MED CAMPUS		Non-Elite	male	99	BOSTON	MA	SCHOOLS OF MEDICINE	21182340	UNITED STATES	N	9/1/13 0:00	8/31/14 0:00	396	Non-SBIR/STTR	2013	248999	NCI	152107	#N/A
NHLBI	8037290	7/26/10 0:00		4R00HL089413-02	4	R00	HL	89413	2		GALIS, ZORINA S	8/2/10 0:00	6/30/13 0:00	NSS	7362389	12	INTERNAL MEDICINE/MEDICINE	73133571	GNJ7BBP73WE9	73133571	GNJ7BBP73WE9	US	42.275494	-83.743038	1506502	U OF MICHIGAN AT ANN ARBOR		Elite	female	84	ANN ARBOR	MI	SCHOOLS OF MEDICINE	481091276	UNITED STATES	N	8/2/10 0:00	6/30/11 0:00	837	Non-SBIR/STTR	2010	249000	NHLBI		coastal
NIEHS	8769561	12/20/13 0:00	PA-11-197	4R00ES021736-03	4	R00	ES	21736	3		TYSON, FREDERICK L	12/20/13 0:00	10/31/16 0:00	NSS	10970797	1	BIOCHEMISTRY	183710748	NHV3GTWSALA7	183710748	NHV3GTWSALA7	US	32.786754	-79.947265	7575301	MED U OF SOUTH CAROLINA		Non-Elite	male	99	CHARLESTON	SC	SCHOOLS OF MEDICINE	294074636	UNITED STATES	N	12/20/13 0:00	10/31/14 0:00	113	Non-SBIR/STTR	2014	249000	NIEHS	166555	#N/A
NHLBI	10543715	3/10/22	PA-18-398	4R00HL141626-04	4	R00	HL	141626	4		ADHIKARI, BISHOW B	4/1/22	3/31/25	NSS	12568013	1	PHARMACOLOGY	41064767	DZ4YCZ3QSPR5	41064767	DZ4YCZ3QSPR5	US	39.129719	-84.520554	1523902	U OF CINCINNATI		Non-Elite	male	63	CINCINNATI	OH	SCHOOLS OF MEDICINE	452210001	UNITED STATES	N	4/1/22	3/31/23	837	Non-SBIR/STTR	2022	249000	NHLBI	174753	#N/A
NIA	9923900	5/28/19 0:00	PA-16-077	4R00AG054736-03	4	R00	AG	54736	3		YANG, AUSTIN JYAN-YU	7/15/17 0:00	3/31/22 0:00	NSS	14378228	3	Unavailable	832127323	DLWBSLWAJWR1	832127323	DLWBSLWAJWR1	US	39.999598	-83.033131	6218701	OHIO STATE U		Non-Elite	male	61	COLUMBUS	OH	Domestic Higher Education	432101016	UNITED STATES	N	6/1/19 0:00	3/31/20 0:00	866	Non-SBIR/STTR	2019	249000	NIA	159616	#N/A
NCI	10554637	3/30/22	PA-19-130	4R00CA237618-03	4	R00	CA	237618	3		WILLIS, KRISTINE AMALEE	4/1/22	3/31/25	Transition to Independence Study Section (I)[NCI-I]	14537033	9	PEDIATRICS	51113330	FXKMA43NTV21	51113330	FXKMA43NTV21	US	29.70926	-95.400851	481201	BAYLOR COLL OF MED		Non-Elite	female	76	HOUSTON	TX	SCHOOLS OF MEDICINE	770303411	UNITED STATES	N	4/1/22	3/31/23	396	Non-SBIR/STTR	2022	249000	NCI	173157	coastal
NIBIB	10115864	4/10/20 0:00	PA-18-398	4R00EB027723-02	4	R00	EB	27723	2		RAMPULLA, DAVID	4/10/20 0:00	3/31/23 0:00	NSS	14528727	18	ENGINEERING (ALL TYPES)	9214214	HJD6G4D6TJY5	9214214	HJD6G4D6TJY5	US	37.426852	-122.17047	8046501	STANFORD U		Elite	female	84	STANFORD	CA	BIOMED ENGR/COL ENGR/ENGR STA	943052004	UNITED STATES	N	4/10/20 0:00	3/31/21 0:00	286	Non-SBIR/STTR	2020	249000	NIBIB	247792	#N/A
NCI	10523144	4/1/22	PA-19-130	4R00CA248838-02	4	R00	CA	248838	2		SALNIKOW, KONSTANTIN	7/1/20	11/30/24	Transition to Independence Study Section (I)[NCI(B)-I]	14727428	30	PEDIATRICS	800771545	YZJ6DKPM4W63	800771545	YZJ6DKPM4W63	US	32.811963	-96.837534	578404	UT SOUTHWESTERN MED CTR		Non-Elite	male	77	DALLAS	TX	SCHOOLS OF MEDICINE	753909105	UNITED STATES	N	12/6/21	11/30/22	395	Non-SBIR/STTR	2022	249000	NCI	153781	coastal
NIDA	10618534	8/26/22	PA-18-398	4R00DA047426-03	4	R00	DA	47426	3		LIN, YU	7/15/19	6/30/25	ZDA1-SXM-M(06)S	14423766	5	PHARMACOLOGY	937639060	E8VWJXMMUQ67	937639060	E8VWJXMMUQ67	US	43.04575	-88.020374	46001	MED COLL OF WISCONSIN		Non-Elite	female	52	MILWAUKEE	WI	SCHOOLS OF MEDICINE	532263548	UNITED STATES	N	7/1/22	6/30/23	279	Non-SBIR/STTR	2022	248999	NIDA	159615	#N/A
NIEHS	7618316	7/16/08 0:00		4R00ES015421-02	4	R00	ES	15421	2		REINLIB, LESLIE J	7/16/08 0:00	5/31/11 0:00	NSS	8630822	1	PHARMACOLOGY	804878247	M746VC6XMNH9	804878247	M746VC6XMNH9	US	40.914561	-73.125169	5992612	STATE U NEW YORK STONY BROOK		Non-Elite	male	99	STONY BROOK	NY	SCHOOLS OF MEDICINE	117943362	UNITED STATES	N	7/16/08 0:00	5/31/09 0:00	113	Non-SBIR/STTR	2008	245261	NIEHS		#N/A
NIGMS	9944865	8/23/19 0:00	PA-16-077	4R00GM121880-03	4	R00	GM	121880	3		FLICKER, PAULA F	5/1/17 0:00	8/31/22 0:00	NSS	14092314	24	BIOCHEMISTRY	94878394	G9QBQDH39DF4	94878394	G9QBQDH39DF4	US	34.431306	-119.834277	577509	U OF CALIFORNIA SANTA BARBARA		Non-Elite	female	97	SANTA BARBARA	CA	SCHOOLS OF ARTS AND SCIENCES	931060001	UNITED STATES	N	9/1/19 0:00	8/31/20 0:00	859	Non-SBIR/STTR	2019	248999	NIGMS	172990	coastal
NIAID	10221805	8/5/20 0:00	PA-18-398	4R00AI138860-03	4	R00	AI	138860	3		ZHOU, YAN	8/16/19 0:00	7/31/22 0:00	NSS	12645073	5	PATHOLOGY	66469933	S352L5PJLMP8	66469933	S352L5PJLMP8	US	33.791247	-84.3249	2384501	EMORY U		Non-Elite	male	100	ATLANTA	GA	SCHOOLS OF MEDICINE	303221007	UNITED STATES	N	8/17/20 0:00	7/31/21 0:00	855	Non-SBIR/STTR	2020	249000	NIAID	139496	#N/A
NICHD	8102533	8/16/10 0:00	PA-10-063	4R00HD056160-02	4	R00	HD	56160	2		KING, ROSALIND B	7/19/10 0:00	6/30/13 0:00	NSS	8782729	7	Unavailable	5492160	JZ8RQC4EMDZ5	5492160	JZ8RQC4EMDZ5	US	42.336854	-71.070881	3617301	BOSTON MED CTR		Non-Elite	male	98	BOSTON	MA	Independent Hospitals	21182908	UNITED STATES	N	7/19/10 0:00	6/30/11 0:00	865	Non-SBIR/STTR	2010	249001	NICHD		#N/A
NIGMS	7472524	7/9/08 0:00	PA-07-297	5R00GM079922-03	5	R00	GM	79922	3		SCHWAB, JOHN M	12/1/06 0:00	6/30/10 0:00	NSS	8081064	33	CHEMISTRY	92530369	RN64EPNH8JC6	92530369	RN64EPNH8JC6	US	34.070199	-118.45102	577505	U OF CALIFORNIA LOS ANGELES		Elite	male	99	LOS ANGELES	CA	SCHOOLS OF ARTS AND SCIENCES	900952000	UNITED STATES	N	7/1/08 0:00	6/30/09 0:00	859	Non-SBIR/STTR	2008	249000	NIGMS		coastal
NIGMS	10359241	5/5/21 0:00	PA-18-398	4R00GM127751-03	4	R00	GM	127751	3		SAKALIAN, MICHAEL	2/1/19 0:00	##########	NSS	14627804	53	CHEMISTRY	73371346	H59JKGFZKHL7	73371346	H59JKGFZKHL7	US	32.762178	-117.06916	513614	SAN DIEGO STATE U	758	Non-Elite	female	61	SAN DIEGO	CA	SCHOOLS OF ARTS AND SCIENCES	921821901	UNITED STATES	N	5/6/21 0:00	##########	859	Non-SBIR/STTR	2021	248919	NIGMS	170260	coastal
NIGMS	8710643	8/22/13 0:00	PA-09-036	4R00GM092859-03	4	R00	GM	92859	3		SESMA, MICHAEL A	5/1/10 0:00	7/31/16 0:00	NSS	9859048	2	Unavailable	786502351	WMHWCFJNAJL3	786502351	WMHWCFJNAJL3	US	38.135302	-122.574863	3123401	BUCK INST FOR RES ON AGING		Non-Elite	female	98	NOVATO	CA	Research Institutes	949451400	UNITED STATES	N	8/22/13 0:00	7/31/14 0:00	859	Non-SBIR/STTR	2013	249000	NIGMS	186495	coastal
NCI	8013460	2/18/10 0:00	PA-06-133	4R00CA137147-03	4	R00	CA	137147	3		TANDON, PUSHPA	3/1/10 0:00	2/28/13 0:00	Institutional Training and Education Study Section (F)[NCI-F]	8534619	2	OTHER BASIC SCIENCES	168559177	G15AG3BLLMH4	168559177	G15AG3BLLMH4	US	41.265996	-96.010026	578104	U OF NEBRASKA MED CTR		Non-Elite	male	100	OMAHA	NE	SCHOOLS OF PHARMACY	681987835	UNITED STATES	N	3/1/10 0:00	2/28/11 0:00	398	Non-SBIR/STTR	2010	249000	NCI		#N/A
NIEHS	9828798	2/7/19 0:00	PA-16-077	4R00ES026648-03	4	R00	ES	26648	3		BOYLES, ABEE	2/15/19 0:00	1/31/22 0:00	NSS	10854492	5	PUBLIC HEALTH & PREV MEDICINE	66469933	S352L5PJLMP8	66469933	S352L5PJLMP8	US	33.791247	-84.3249	2384501	EMORY U		Non-Elite	female	97	ATLANTA	GA	SCHOOLS OF PUBLIC HEALTH	303221007	UNITED STATES	N	2/15/19 0:00	1/31/20 0:00	113	Non-SBIR/STTR	2019	248999	NIEHS	159615	#N/A
NIAAA	8700574	9/12/13 0:00	PA-10-063	4R00AA020537-03	4	R00	AA	20537	3		CUI, CHANGHAI	9/1/13 0:00	8/31/16 0:00	NSS	8868766	1	Unavailable	183710748	NHV3GTWSALA7	183710748	NHV3GTWSALA7	US	32.786754	-79.947265	7575301	MED U OF SOUTH CAROLINA		Non-Elite	male	98	CHARLESTON	SC	Domestic Higher Education	294074636	UNITED STATES	N	9/15/13 0:00	8/31/14 0:00	273	Non-SBIR/STTR	2013	249000	NIAAA	166555	coastal
NIEHS	9162595	11/30/15 0:00	PA-11-197	4R00ES023813-02	4	R00	ES	23813	2		SHAUGHNESSY, DANIEL	12/1/15 0:00	11/30/18 0:00	NSS	9303574	1	NONE	172750234	QB12VPNQQFE8	172750234	QB12VPNQQFE8	US	30.688966	-88.189832	130401	U OF SOUTH ALABAMA		Non-Elite	female	98	MOBILE	AL	ORGANIZED RESEARCH UNITS	366880002	UNITED STATES	N	12/1/15 0:00	11/30/16 0:00	113	Non-SBIR/STTR	2016	249000	NIEHS	183840	coastal
NINDS	10529475	12/31/21	PA-19-130	4R00NS112458-03	4	R00	NS	112458	3		MCGAVERN, LINDA	7/15/20	12/31/24	NST-2 Study Section [NST-2]	11468941	7	NEUROLOGY	5436803	KG76WYENL5K1	5436803	KG76WYENL5K1	US	42.050479	-87.680046	6144650	NORTHWESTERN U		Elite	male	99	CHICAGO	IL	SCHOOLS OF MEDICINE	606114579	UNITED STATES	N	1/1/22	12/31/22	853	Non-SBIR/STTR	2022	249000	NINDS	155625	#N/A
NCI	9120463	9/10/15 0:00	PA-11-197	4R00CA166228-03	4	R00	CA	166228	3		WATSON, JOANNA M	9/2/13 0:00	8/31/18 0:00	NSS	8954110	6	NONE	78728091	QL3ZB67MLJL5	78728091	QL3ZB67MLJL5	US	40.496118	-74.4481	10034166	RBHS CANCER INST OF NEW JERSEY		Non-Elite	male	99	NEW BRUNSWICK	NJ	OVERALL MEDICAL	89011914	UNITED STATES	N	9/10/15 0:00	8/31/16 0:00	396	Non-SBIR/STTR	2015	249000	NCI	156604	coastal
NHLBI	8327897	9/12/11 0:00		4R00HL095929-02	4	R00	HL	95929	2		MONDORO, TRACI	9/14/11 0:00	7/31/14 0:00	NSS	9508294	14	BIOCHEMISTRY	110521739		110521739		US	40.85103	-73.844379	9433501	ALBERT EINSTEIN COLL OF MED		Non-Elite	male	100	BRONX	NY	SCHOOLS OF MEDICINE	104611900	UNITED STATES	N	9/14/11 0:00	7/31/12 0:00	837	Non-SBIR/STTR	2011	249000	NHLBI		#N/A
NIMH	8978909	6/23/15 0:00	PA-11-197	4R00MH099654-03	4	R00	MH	99654	3		BUHRING, BETTINA D	1/1/13 0:00	3/31/18 0:00	NSS	8837402	7	BIOLOGY	49435266	THL6A6JLE1S7	49435266	THL6A6JLE1S7	US	42.349594	-71.099726	10001093	BOSTON U (CHARLES RIVER CAMPUS)		Non-Elite	male	100	BOSTON	MA	SCHOOLS OF ARTS AND SCIENCES	22151390	UNITED STATES	N	7/1/15 0:00	3/31/16 0:00	242	Non-SBIR/STTR	2015	248115	NIMH	151567	#N/A
NHGRI	10209027	8/12/20 0:00	PA-16-193	4R00HG010160-03	4	R00	HG	10160	3		CHADWICK, LISA	8/12/20 0:00	5/31/23 0:00	NSS	14444240	37	PUBLIC HEALTH & PREV MEDICINE	72933393	G88KLJR3KYT5	72933393	G88KLJR3KYT5	US	34.017282	-118.281254	7636101	U OF SOUTHERN CALIFORNIA		Non-Elite	male	99	Los Angeles	CA	SCHOOLS OF MEDICINE	900894304	UNITED STATES	N	8/12/20 0:00	5/31/21 0:00	172	Non-SBIR/STTR	2020	249000	NHGRI	150909	coastal
NIA	10058453	12/12/19 0:00	PA-16-193	4R00AG054573-03	4	R00	AG	54573	3		YAO, ALISON Q	8/15/17 0:00	11/30/22 0:00	NSS	12255460	8	Unavailable	73130411	FLJ7DQKLL226	73130411	FLJ7DQKLL226	US	42.363198	-71.068772	4907701	MASSACHUSETTS GENERAL HOSP		Elite	male	69	BOSTON	MA	Independent Hospitals	21142621	UNITED STATES	N	12/15/19 0:00	11/30/20 0:00	866	Non-SBIR/STTR	2020	244070	NIA	145280	#N/A
NINDS	8787281	2/10/14 0:00	PA-10-063	4R00NS073735-03	4	R00	NS	73735	3		KOENIG, JAMES I	9/5/13 0:00	1/31/17 0:00	NSS	10489035	30	PEDIATRICS	800771545	YZJ6DKPM4W63	800771545	YZJ6DKPM4W63	US	32.811963	-96.837534	578404	UT SOUTHWESTERN MED CTR		Non-Elite	male	62	DALLAS	TX	SCHOOLS OF MEDICINE	753909105	UNITED STATES	N	2/15/14 0:00	1/31/15 0:00	853	Non-SBIR/STTR	2014	249000	NINDS	176526	coastal
NHGRI	9836955	2/8/19 0:00	PA-16-193	4R00HG009679-02	4	R00	HG	9679	2		WILEY, KENNETH L	2/1/19 0:00	1/31/22 0:00	NSS	14263385	9	Unavailable	67717892	JL4JHE9SDRR3	67717892	JL4JHE9SDRR3	US	35.155607	-90.045279	7893501	ST JUDE CHILDRENS RES HOSP		Non-Elite	male	99	MEMPHIS	TN	Independent Hospitals	381053678	UNITED STATES	N	2/1/19 0:00	1/31/20 0:00	172	Non-SBIR/STTR	2019	248967	NHGRI	138700	coastal
NHGRI	9123773	8/17/15 0:00	PA-11-197	4R00HG007583-03	4	R00	HG	7583	3		GILCHRIST, DANIEL A	8/18/15 0:00	7/31/18 0:00	NSS	10917418	7	MISCELLANEOUS	47006379	JDLVAVGYJQ21	47006379	JDLVAVGYJQ21	US	42.335672	-71.104237	3212902	HARVARD MED SCH		Elite	male	99	BOSTON	MA	SCHOOLS OF MEDICINE	21201616	UNITED STATES	N	8/18/15 0:00	7/31/16 0:00	172	Non-SBIR/STTR	2015	248995	NHGRI	149155	coastal
NINDS	7675572	9/4/08 0:00		4R00NS061803-03	4	R00	NS	61803	3		STEWART, RANDALL R	9/15/07 0:00	8/31/11 0:00	NSS	7923267	6	BIOCHEMISTRY	939017877	H1HYA8Z1NTM5	939017877	H1HYA8Z1NTM5	US	38.040959	-84.505885	2793601	U OF KENTUCKY		Non-Elite	male	100	LEXINGTON	KY	SCHOOLS OF MEDICINE	405260001	UNITED STATES	N	9/15/08 0:00	8/31/09 0:00	853	Non-SBIR/STTR	2008	232725	NINDS		coastal
NHLBI	8803859	4/8/14 0:00	PA-11-197	4R00HL116774-02	4	R00	HL	116774	2		GALIS, ZORINA S	4/8/14 0:00	3/31/17 0:00	NSS	10456687	3	Unavailable	928824473	X59NJBFL8BJ3	928824473	X59NJBFL8BJ3	US	32.328724	-90.175537	5390304	U OF MISSISSIPPI MED CTR		Non-Elite	male	99	JACKSON	MS	Domestic Higher Education	392164500	UNITED STATES	N	4/8/14 0:00	3/31/15 0:00	837	Non-SBIR/STTR	2014	248813	NHLBI	167115	#N/A
NCI	10328414	##########	PA-19-130	4R00CA241310-02	4	R00	CA	241310	2		SMITH, ASHLEY	##########	##########	Transition to Independence Study Section (I)[NCI-I]	14089595	10	Unavailable	78795869	NQ89VJZ99MJ1	78795869	NQ89VJZ99MJ1	US	40.744318	-74.190439	10034174	RBHS SCH OF NURSING		Non-Elite	male	76	NEWARK	NJ	Domestic Higher Education	71073001	UNITED STATES	N	6/1/21 0:00	##########	398	Non-SBIR/STTR	2021	249000	NCI	159190	coastal
NHGRI	8730267	11/29/13 0:00	PA-11-197	4R00HG006922-03	4	R00	HG	6922	3		FEINGOLD, ELISE A	7/18/12 0:00	11/30/16 0:00	NSS	10504830	2	INTERNAL MEDICINE/MEDICINE	9095365	LL8GLEVH6MG3	9095365	LL8GLEVH6MG3	US	40.764542	-111.850317	514002	U OF UTAH		Non-Elite	male	99	SALT LAKE CITY	UT	SCHOOLS OF MEDICINE	841128906	UNITED STATES	N	12/1/13 0:00	11/30/14 0:00	172	Non-SBIR/STTR	2014	248283	NHGRI	183569	#N/A
NICHD	8247870	4/19/11 0:00		4R00HD060686-03	4	R00	HD	60686	3		QUATRANO, LOUIS A	2/3/10 0:00	1/31/14 0:00	NSS	9409633	12	PUBLIC HEALTH & PREV MEDICINE	60217502	YNT8TCJH8FQ8	60217502	YNT8TCJH8FQ8	US	40.7607	-73.9603	1514803	WEILL MED COLL OF CORNELL U		Elite	male	98	NEW YORK	NY	SCHOOLS OF MEDICINE	100654805	UNITED STATES	N	5/1/11 0:00	1/31/12 0:00	865	Non-SBIR/STTR	2011	249000	NICHD		#N/A
NIAAA	10373277	##########	PA-16-193	4R00AA025677-03	4	R00	AA	25677	3		MATOCHIK, JOHN A	6/1/21 0:00	##########	NSS	9748944	18	PSYCHIATRY	9214214	HJD6G4D6TJY5	9214214	HJD6G4D6TJY5	US	37.426852	-122.17047	8046501	STANFORD U		Elite	male	99	STANFORD	CA	SCHOOLS OF MEDICINE	943052004	UNITED STATES	N	6/1/21 0:00	##########	273	Non-SBIR/STTR	2021	249000	NIAAA	165223	coastal
NCI	9449854	3/24/17 0:00	PA-15-083	4R00CA204602-02	4	R00	CA	204602	2		FORRY, SUZANNE L	4/1/17 0:00	3/31/20 0:00	NSS	8946136	12	Unavailable	94878337	KMH5K9V7S518	94878337	KMH5K9V7S518	US	37.767442	-122.413937	577508	U OF CALIFORNIA SAN FRANCISCO		Elite	male	99	SAN FRANCISCO	CA	Domestic Higher Education	941432510	UNITED STATES	N	4/1/17 0:00	3/31/18 0:00	395	Non-SBIR/STTR	2017	249000	NCI	157098	#N/A
NIGMS	7664685	8/25/08 0:00	PA-07-297	4R00GM081399-02	4	R00	GM	81399	2		CARTER, ANTHONY D	8/13/07 0:00	8/31/11 0:00	NSS	8781331	7	BIOLOGY	1425594	E2NYLCDML6V1	1425594	E2NYLCDML6V1	US	42.359128	-71.093339	4911501	MASSACHUSETTS INST OF TECHNOLOGY		Elite	female	96	CAMBRIDGE	MA	SCHOOLS OF ARTS AND SCIENCES	21421029	UNITED STATES	N	9/1/08 0:00	8/31/09 0:00	859	Non-SBIR/STTR	2008	249000	NIGMS		coastal
NCI	9245138	7/29/16 0:00	PA-11-197	4R00CA169430-03	4	R00	CA	169430	3		DASCHNER, PHILLIP J	8/12/13 0:00	7/31/19 0:00	NSS	11085904	17	NUTRITION	847205713	KU3DCFJJTVN3	847205713	KU3DCFJJTVN3	US	30.611331	-96.348373	8266920	TEXAS A&M AGRILIFE RES		Non-Elite	female	96	College Station	TX	EARTH SCIENCES/RESOURCES	77845	UNITED STATES	N	8/1/16 0:00	7/31/17 0:00	393	Non-SBIR/STTR	2016	249000	NCI	181394	#N/A
NCI	9148271	9/26/15 0:00	PA-11-197	4R00CA181352-03	4	R00	CA	181352	3		AULT, GRACE S	2/1/14 0:00	8/31/18 0:00	NSS	10163230	7	INTERNAL MEDICINE/MEDICINE	1910777	FTMTDMBR29C7	1910777	FTMTDMBR29C7	US	39.325256	-76.605131	4134401	JOHNS HOPKINS U		Elite	male	87	BALTIMORE	MD	SCHOOLS OF MEDICINE	212182680	UNITED STATES	N	9/25/15 0:00	8/31/16 0:00	398	Non-SBIR/STTR	2015	248999	NCI	174654	#N/A
NINDS	10468470	##########	RFA-OD-12-001	4R00NS127335-02	4	R00	NS	127335	2		BELLGOWAN, PATRICK S F	9/1/21 0:00	##########	Special Emphasis Panel[ZRG1-OTC-K(55)R]	10714670	7	NEUROLOGY	1910777	FTMTDMBR29C7	1910777	FTMTDMBR29C7	US	39.325256	-76.605131	4134401	JOHNS HOPKINS U		Elite	female	98	BALTIMORE	MD	SCHOOLS OF MEDICINE	212182680	UNITED STATES	N	9/1/21 0:00	##########	853	Non-SBIR/STTR	2021	731229	NINR	481590	#N/A
NIDA	8112779	9/10/10 0:00	PA-06-133	4R00DA023549-03	4	R00	DA	23549	3		WEINBERG, NAIMAH Z	9/15/10 0:00	7/31/13 0:00	NSS	8780681	4	PSYCHIATRY	105300446	MLQFL4JSSAA9	105300446	MLQFL4JSSAA9	US	37.549807	-77.452775	353201	VIRGINIA COMMONWEALTH U		Non-Elite	male	99	RICHMOND	VA	SCHOOLS OF MEDICINE	232980568	UNITED STATES	N	9/15/10 0:00	7/31/11 0:00	279	Non-SBIR/STTR	2010	229417	NIDA		coastal
NIAAA	8275795	8/19/11 0:00	PA-10-063	4R00AA018400-03	4	R00	AA	18400	3		EGLI, MARK	5/1/10 0:00	6/30/14 0:00	NSS	8500922	2	PHYSIOLOGY	782627814	M7KCJ79FAVH5	782627814	M7KCJ79FAVH5	US	29.957378	-90.082793	577902	LSU HEALTH SCI CTR		Non-Elite	male	100	NEW ORLEANS	LA	SCHOOLS OF MEDICINE	701127021	UNITED STATES	N	8/20/11 0:00	6/30/12 0:00	273	Non-SBIR/STTR	2011	249000	NIAAA		#N/A
NIDA	9301729	6/23/16 0:00	PA-15-322	3R00DA036569-03S1	3	R00	DA	36569	3	S	SORENSEN, ROGER	1/15/16 0:00	12/31/18 0:00	NSS	9706320	9	PSYCHOLOGY	943360412	NTLHJXM55KZ6	943360412	NTLHJXM55KZ6	US	33.423954	-111.940687	488301	ARIZONA STATE U TEMPE CAMPUS		Non-Elite	female	98	TEMPE	AZ	SCHOOLS OF ARTS AND SCIENCES	852876011	UNITED STATES	N	1/15/16 0:00	12/31/16 0:00	279	Non-SBIR/STTR	2016	21049	NIDA	16774	#N/A
NIDCD	8966270	12/18/14 0:00	PA-11-197	4R00DC013305-03	4	R00	DC	13305	3		RIVERA-RENTAS, ALBERTO L	6/12/13 0:00	5/31/18 0:00	Communication Disorders Review Committee[CDRC]	8842712	7	PSYCHOLOGY	605799469	HD1WMN6945W6	605799469	HD1WMN6945W6	US	47.660307	-122.315168	9087701	U OF WASHINGTON		Elite	male	99	SEATTLE	WA	SCHOOLS OF ARTS AND SCIENCES	981959472	UNITED STATES	N	1/1/15 0:00	12/31/15 0:00	173	Non-SBIR/STTR	2015	249000	NIDCD	187516	#N/A
NINDS	8587526	12/15/12 0:00		4R00NS076524-03	4	R00	NS	76524	3		SIEBER, BETH-ANNE	12/15/12 0:00	11/30/15 0:00	NSS	9530640	18	BIOLOGY	52184116	U3NKNFLNQ613	52184116	G4P3TF8PFH73; KZV2XNZZN3A8; MJ5BDF8KMQ43; U3NKNFLNQ613; U9C6D6YR7P69	US	40.442959	-79.941084	247601	CARNEGIE MELLON U	955	Elite	female	80	PITTSBURGH	PA	SCHOOLS OF ARTS AND SCIENCES	152133815	UNITED STATES	N	12/15/12 0:00	11/30/13 0:00	853	Non-SBIR/STTR	2013	240288	NINDS	158188	#N/A
NCI	10451940	##########	PA-18-398	4R00CA240681-03	4	R00	CA	240681	3		ZHANG, YANTIAN	7/1/19 0:00	##########	Transition to Independence Study Section (I)[NCI-I]	14298325	7	Unavailable	137210949	NFHEUCKBFMU4	137210949	NFHEUCKBFMU4	US	47.650084	-122.3516	10012306	ALLEN INST		Non-Elite	male	99	SEATTLE	WA	Research Institutes	981094307	UNITED STATES	N	9/13/21 0:00	##########	398	Non-SBIR/STTR	2021	248318	NCI	198618	coastal
NIGMS	10609154	7/22/22	PA-19-130	4R00GM135529-03	4	R00	GM	135529	3		BARSKI, OLEG	3/1/20	7/31/25	ZGM1-SRC(99)	14339520	13	BIOCHEMISTRY	621889815	QHF5ZZ114M72	621889815	QHF5ZZ114M72	US	40.8415	-73.9414	1833205	COLUMBIA U HEALTH SCI		Elite	female	95	NEW YORK	NY	SCHOOLS OF MEDICINE	100323725	UNITED STATES	N	8/1/22	7/31/23	859	Non-SBIR/STTR	2022	249000	NIGMS	159076	coastal
NHLBI	8609178	4/26/13 0:00	PA-10-063	4R00HL107641-03	4	R00	HL	107641	3		KRULL, HOLLY	4/1/11 0:00	3/31/16 0:00	NSS	10510511	4	Unavailable	95439774	FA4VKPTJRLY8	95439774	FA4VKPTJRLY8	US	32.481648	-93.760821	577905	LOUISIANA STATE U HSC SHREVEPORT		Non-Elite	male	98	SHREVEPORT	LA	Domestic Higher Education	711034228	UNITED STATES	N	4/26/13 0:00	3/31/14 0:00	837	Non-SBIR/STTR	2013	237048	NHLBI	164617	coastal
NHLBI	10657848	8/14/22	PA-20-188	4R00HL153696-03	4	R00	HL	153696	3		HILL-PRYOR, CRYSTAL DARLEANE-ROBIN	9/1/22	8/31/25	NSS	11980559	2	PHARMACOLOGY	57123192	QD4MGHFDJKU1	57123192	QD4MGHFDJKU1	US	39.980272	-75.157051	8240301	TEMPLE U OF THE COMMONWEALTH		Non-Elite	male	99	PHILADELPHIA	PA	SCHOOLS OF PHARMACY	191226003	UNITED STATES	N	9/1/22	8/31/23	839	Non-SBIR/STTR	2022	249000	NHLBI	157098	#N/A
NHGRI	10583654	3/31/22	PA-19-130	4R00HG010904-03	4	R00	HG	10904	3		VOLPI, SIMONA	3/31/22	2/28/25	NSS	14655663	5	Unavailable	79917897	GYLUH9UXHDX5	79917897	GYLUH9UXHDX5	US	36.143784	-86.800995	10040927	VANDERBILT U MED CTR		Non-Elite	male	99	NASHVILLE	TN	Independent Hospitals	372320011	UNITED STATES	N	3/31/22	2/28/23	172	Non-SBIR/STTR	2022	248999	NHGRI	143930	coastal
NCI	9070066	9/15/15 0:00	PA-11-197	4R00CA172360-03	4	R00	CA	172360	3		LI, JERRY	9/15/15 0:00	8/31/18 0:00	NSS	10381742	2	ENGINEERING (ALL TYPES)	57123192	QD4MGHFDJKU1	57123192	QD4MGHFDJKU1	US	39.980272	-75.157051	8240301	TEMPLE U OF THE COMMONWEALTH		Non-Elite	female	97	PHILADELPHIA	PA	BIOMED ENGR/COL ENGR/ENGR STA	191226003	UNITED STATES	N	9/15/15 0:00	8/31/16 0:00	396	Non-SBIR/STTR	2015	249000	NCI	175043	coastal
NIAAA	9656213	4/19/18 0:00	PA-15-083	4R00AA024208-03	4	R00	AA	24208	3		LIU, QI-YING	4/20/18 0:00	3/31/21 0:00	NSS	8771183	7	PSYCHIATRY	98987217	W8XEAJDKMXH3	98987217	W8XEAJDKMXH3	US	41.871509	-87.667721	577703	U OF ILLINOIS AT CHICAGO		Non-Elite	female	99	Chicago	IL	SCHOOLS OF MEDICINE	606124305	UNITED STATES	N	4/20/18 0:00	3/31/19 0:00	273	Non-SBIR/STTR	2018	249000	NIAAA	180434	#N/A
NIMH	9177784	2/8/16 0:00	PA-11-197	4R00MH104259-03	4	R00	MH	104259	3		BUHRING, BETTINA D	2/8/16 0:00	1/31/19 0:00	NSS	8728803	24	MISCELLANEOUS	94878394	G9QBQDH39DF4	94878394	G9QBQDH39DF4	US	34.431306	-119.834277	577509	U OF CALIFORNIA SANTA BARBARA		Non-Elite	male	99	SANTA BARBARA	CA	ORGANIZED RESEARCH UNITS	931060001	UNITED STATES	N	2/8/16 0:00	1/31/17 0:00	242	Non-SBIR/STTR	2016	248999	NIMH	199856	coastal
NIEHS	9602184	3/15/18 0:00	PA-14-042	4R00ES023472-03	4	R00	ES	23472	3		BOYLES, ABEE	4/1/18 0:00	3/31/21 0:00	NSS	11687299	1	PUBLIC HEALTH & PREV MEDICINE	53785812	XNY5ULPU8EN6	53785812	XNY5ULPU8EN6	US	29.935429	-90.12279	8424601	TULANE U OF LOUISIANA		Non-Elite	male	100	NEW ORLEANS	LA	SCHOOLS OF PUBLIC HEALTH	701185665	UNITED STATES	N	4/1/18 0:00	3/31/19 0:00	113	Non-SBIR/STTR	2018	248795	NIEHS	184271	#N/A
NIBIB	8719535	8/28/13 0:00	PA-10-063	4R00EB013446-03	4	R00	EB	13446	3		HUNZIKER, ROSEMARIE	9/1/13 0:00	8/31/16 0:00	NSS	10486393	52	CHEMISTRY	804355790	UYTTZT6G9DT1	804355790	UYTTZT6G9DT1	US	32.876991	-117.24087	577507	U OF CALIFORNIA SAN DIEGO		Elite	male	97	LA JOLLA	CA	SCHOOLS OF ARTS AND SCIENCES	920930621	UNITED STATES	N	9/1/13 0:00	8/31/14 0:00	286	Non-SBIR/STTR	2013	248999	NIBIB	164193	#N/A
NHLBI	10556834	7/8/22	PA-19-130	4R00HL150234-03	4	R00	HL	150234	3		HUANG, LI-SHIN	8/1/22	7/31/25	NSS	11196865	13	INTERNAL MEDICINE/MEDICINE	78861598	C8H9CNG1VBD9	78861598	C8H9CNG1VBD9	US	40.790284	-73.946781	3839801	ICAHN SCH OF MED AT MOUNT SINAI		Non-Elite	female	65	NEW YORK	NY	SCHOOLS OF MEDICINE	100296574	UNITED STATES	N	8/1/22	7/31/23	837	Non-SBIR/STTR	2022	249000	NHLBI	147337	coastal
NIEHS	9761615	8/28/18 0:00	PA-15-083	4R00ES026653-03	4	R00	ES	26653	3		SHAUGHNESSY, DANIEL	9/1/18 0:00	7/31/21 0:00	NSS	9458652	6	PHARMACOLOGY	939017877	H1HYA8Z1NTM5	939017877	H1HYA8Z1NTM5	US	38.040959	-84.505885	2793601	U OF KENTUCKY		Non-Elite	female	98	LEXINGTON	KY	SCHOOLS OF MEDICINE	405260001	UNITED STATES	N	9/1/18 0:00	7/31/19 0:00	113	Non-SBIR/STTR	2018	249000	NIEHS	178334	coastal
NIMH	8441986	8/6/12 0:00		4R00MH086049-03	4	R00	MH	86049	3		MUSICK, ANJENE M	2/2/10 0:00	5/31/15 0:00	NSS	9525443	7	PSYCHIATRY	1910777	FTMTDMBR29C7	1910777	FTMTDMBR29C7	US	39.325256	-76.605131	4134401	JOHNS HOPKINS U		Elite	male	99	BALTIMORE	MD	SCHOOLS OF MEDICINE	212182680	UNITED STATES	N	8/6/12 0:00	5/31/13 0:00	242	Non-SBIR/STTR	2012	249000	NIMH	153704	coastal
NICHD	8993019	3/11/15 0:00	PA-11-197	4R00HD076444-03	4	R00	HD	76444	3		PARISI, MELISSA	9/9/13 0:00	3/31/18 0:00	NSS	9166011	4	PHARMACOLOGY	44387793	TP7EK8DZV6N5	44387793	TP7EK8DZV6N5	US	36.007766	-78.926475	2221101	DUKE U		Elite	female	98	DURHAM	NC	SCHOOLS OF MEDICINE	277054673	UNITED STATES	N	4/1/15 0:00	3/31/16 0:00	865	Non-SBIR/STTR	2015	249168	NICHD	157369	#N/A
NIDDK	10469099	##########	PA-18-398	4R00DK119413-03	4	R00	DK	119413	3		MARIC-BILKAN, CHRISTINE	##########	##########	NSS	12638554	5	Unavailable	79917897	GYLUH9UXHDX5	79917897	GYLUH9UXHDX5	US	36.143784	-86.800995	10040927	VANDERBILT U MED CTR		Non-Elite	female	80	NASHVILLE	TN	Independent Hospitals	372320011	UNITED STATES	N	9/13/21 0:00	##########	847	Non-SBIR/STTR	2021	249000	NIDDK	191202	coastal
NIA	10116685	9/14/20 0:00	PA-18-398	4R00AG058801-03	4	R00	AG	58801	3		FULDNER, REBECCA A	1/1/19 0:00	5/31/23 0:00	NSS	14938925	12	PHYSIOLOGY	94878337	KMH5K9V7S518	94878337	KMH5K9V7S518	US	37.767442	-122.413937	577508	U OF CALIFORNIA SAN FRANCISCO		Elite	female	98	SAN FRANCISCO	CA	SCHOOLS OF MEDICINE	941432510	UNITED STATES	N	9/30/20 0:00	5/31/21 0:00	866	Non-SBIR/STTR	2020	249000	NIA	199120	#N/A
NINDS	8531556	9/4/12 0:00	PA-10-063	4R00NS067062-03	4	R00	NS	67062	3		BABCOCK, DEBRA J	9/1/10 0:00	8/31/15 0:00	NST-2 Study Section [NST-2]	9719138	23	OTHER BASIC SCIENCES	872612445	G56PUALJ3KT5	872612445	CCV3WG2JG248; D4H1NV4APKP3; ELS2M3C6V2S5; EQA8NBEN9WD5; FFAZGE9NH3M8; G56PUALJ3KT5; K6JRCJJXFET1; M8FBSLHASMT3; P4LRVQT1H4K5; PJUVN8AT5416; RT1JPM9UMGM5; ZBMGUAZYFGC4; ZMP8BDLJTUW9	US	42.438	-76.4625	1514802	CORNELL U		Elite	male	93	ITHACA	NY	SCHOOLS OF ARTS AND SCIENCES	148502820	UNITED STATES	N	9/1/12 0:00	8/31/13 0:00	853	Non-SBIR/STTR	2012	249000	NINDS	155625	coastal
NIDA	9830806	7/30/19 0:00	PA-16-193	4R00DA045662-02	4	R00	DA	45662	2		SORENSEN, ROGER	8/1/19 0:00	7/31/22 0:00	ZDA1-SXM-M(02)S	10854241	7	ANATOMY/CELL BIOLOGY	605799469	HD1WMN6945W6	605799469	HD1WMN6945W6	US	47.660307	-122.315168	9087701	U OF WASHINGTON		Elite	male	72	SEATTLE	WA	SCHOOLS OF MEDICINE	981959472	UNITED STATES	N	8/1/19 0:00	7/31/20 0:00	279	Non-SBIR/STTR	2019	249000	NIDA	206695	#N/A
NIBIB	9742704	9/17/18 0:00	PA-15-083	4R00EB021320-02	4	R00	EB	21320	2		WANG, SHUMIN	9/17/18 0:00	6/30/21 0:00	NSS	12541041	7	RADIATION-DIAGNOSTIC/ONCOLOGY	5436803	KG76WYENL5K1	5436803	KG76WYENL5K1	US	42.050479	-87.680046	6144650	NORTHWESTERN U		Elite	male	90	CHICAGO	IL	SCHOOLS OF MEDICINE	606114579	UNITED STATES	N	9/17/18 0:00	6/30/19 0:00	286	Non-SBIR/STTR	2018	246549	NIBIB	176061	coastal
NICHD	8900442	9/7/14 0:00	PA-10-063	4R00HD070874-03	4	R00	HD	70874	3		NEWCOMER, SUSAN	9/15/14 0:00	8/31/17 0:00	NSS	9773886	13	NONE	124726725	GS3YEVSS12N6	124726725	GS3YEVSS12N6	US	37.870017	-122.268624	577502	U OF CALIFORNIA BERKELEY	1516	Elite	female	97	BERKELEY	CA	SCHOOLS OF SOCIAL WELFARE/WORK	947101749	UNITED STATES	N	9/15/14 0:00	8/31/15 0:00	865	Non-SBIR/STTR	2014	249000	NICHD	159029	coastal
NIMH	10221130	9/10/20 0:00	PAR-18-814	4R00MH120046-03	4	R00	MH	120046	3		MCMULLEN, DAVID	4/1/19 0:00	8/31/23 0:00	NSS	14785846	4	ENGINEERING (ALL TYPES)	72051394	YRXVL4JYCEF5	72051394	YRXVL4JYCEF5	US	40.41872	-86.910361	1481402	PURDUE U		Non-Elite	male	99	WEST LAFAYETTE	IN	BIOMED ENGR/COL ENGR/ENGR STA	47906	UNITED STATES	N	9/10/20 0:00	8/31/21 0:00	242	Non-SBIR/STTR	2020	222983	NIMH	151993	#N/A
NIAAA	8603965	3/1/13 0:00	PA-10-063	4R00AA020235-03	4	R00	AA	20235	3		MATOCHIK, JOHN A	3/1/13 0:00	2/29/16 0:00	NSS	10324727	52	PSYCHIATRY	804355790	UYTTZT6G9DT1	804355790	UYTTZT6G9DT1	US	32.876991	-117.24087	577507	U OF CALIFORNIA SAN DIEGO		Elite	male	100	LA JOLLA	CA	SCHOOLS OF MEDICINE	920930621	UNITED STATES	N	3/1/13 0:00	2/28/14 0:00	273	Non-SBIR/STTR	2013	248897	NIAAA	160579	#N/A
NIDDK	8254572	7/11/11 0:00	PA-07-297	4R00DK083455-03	4	R00	DK	83455	3		KETCHUM, CHRISTIAN J	8/1/11 0:00	5/31/14 0:00	NSS	9493416	28	Unavailable	75307785	NCSMA19DF7E6	75307785	NCSMA19DF7E6	US	34.076544	-118.380004	1225501	CEDARS SINAI MED CTR		Non-Elite	male	99	LOS ANGELES	CA	Independent Hospitals	900481804	UNITED STATES	N	8/1/11 0:00	5/31/12 0:00	847	Non-SBIR/STTR	2011	249000	NIDDK		coastal
NHLBI	10091702	4/1/20 0:00	PA-16-193	4R00HL143165-03	4	R00	HL	143165	3		OCHOCINSKA, MARGARET J	4/1/20 0:00	3/31/23 0:00	NSS	10529882	7	Unavailable	79532263	MY2ERHGDV956	79532263	MY2ERHGDV956	US	42.349512	-71.063308	130301	TUFTS MED CTR		Non-Elite	female	95	BOSTON	MA	Independent Hospitals	21111552	UNITED STATES	N	4/1/20 0:00	3/31/21 0:00	839	Non-SBIR/STTR	2020	249000	NHLBI	148348	coastal
NCI	9222328	3/5/16 0:00	PA-14-042	4R00CA194077-02	4	R00	CA	194077	2		STRASBURGER, JENNIFER	5/1/16 0:00	4/30/19 0:00	NSS	10906652	12	BIOCHEMISTRY	94878337	KMH5K9V7S518	94878337	KMH5K9V7S518	US	37.767442	-122.413937	577508	U OF CALIFORNIA SAN FRANCISCO		Elite	male	84	SAN FRANCISCO	CA	SCHOOLS OF MEDICINE	941432510	UNITED STATES	N	5/1/16 0:00	4/30/17 0:00	396	Non-SBIR/STTR	2016	248988	NCI	157090	coastal
NIAID	8889860	7/31/14 0:00	PA-11-197	4R00AI106963-02	4	R00	AI	106963	2		PALKER, THOMAS J	8/1/14 0:00	7/31/16 0:00	NSS	10863889	5	NONE	41485301	XRJSGX384TD6	41485301	XRJSGX384TD6	US	46.728892	-117.155742	9082001	WASHINGTON STATE U		Non-Elite	male	99	PULLMAN	WA	SCHOOLS OF VETERINARY MEDICINE	991641060	UNITED STATES	N	8/1/14 0:00	7/31/15 0:00	855	Non-SBIR/STTR	2014	249000	NIAID	164901	#N/A
NCI	8536461	9/18/12 0:00	RFA-CA-09-015	4R00CA153935-03	4	R00	CA	153935	3		FARRELL, DOROTHY F	9/7/10 0:00	7/31/15 0:00	NSS	8891698	2	ENGINEERING (ALL TYPES)	7431505	SPVKK1RC2MZ3	7431505	SPVKK1RC2MZ3	US	40.013296	-105.251932	1199902	U OF COLORADO		Non-Elite	male	99	Boulder	CO	BIOMED ENGR/COL ENGR/ENGR STA	803031058	UNITED STATES	N	9/18/12 0:00	7/31/13 0:00	394	Non-SBIR/STTR	2012	249000	NCI	188089	#N/A
NIGMS	8041432	4/5/10 0:00		4R00GM085279-02	4	R00	GM	85279	2		JONES, WARREN	9/1/08 0:00	3/31/13 0:00	NSS	8817280	7	PHYSICS	1425594	E2NYLCDML6V1	1425594	E2NYLCDML6V1	US	42.359128	-71.093339	4911501	MASSACHUSETTS INST OF TECHNOLOGY		Elite	male	99	CAMBRIDGE	MA	SCHOOLS OF ARTS AND SCIENCES	21421029	UNITED STATES	N	4/5/10 0:00	3/31/11 0:00	859	Non-SBIR/STTR	2010	249000	NIGMS		coastal
NCI	8198179	1/4/11 0:00	PA-10-063	4R00CA137860-02	4	R00	CA	137860	2		READ-CONNOLE, ELIZABETH LEE	1/5/11 0:00	12/31/12 0:00	NSS	9354245	7	MICROBIOLOGY/IMMUN/VIROLOGY	5436803	KG76WYENL5K1	5436803	KG76WYENL5K1	US	42.050479	-87.680046	6144650	NORTHWESTERN U		Elite	female	98	CHICAGO	IL	SCHOOLS OF MEDICINE	606114579	UNITED STATES	N	1/5/11 0:00	12/31/11 0:00	393	Non-SBIR/STTR	2011	249000	NCI		#N/A
NIDA	9897092	8/26/19 0:00	PA-15-083	4R00DA042129-03	4	R00	DA	42129	3		SORENSEN, ROGER	9/1/19 0:00	8/31/22 0:00	ZDA1-SXM-M(04)S	9823199	6	PHYSIOLOGY	937727907	SN7KD2UK7GC5	937727907	SN7KD2UK7GC5	US	36.059402	-80.321981	9021205	WAKE FOREST U HEALTH SCI		Non-Elite	male	99	WINSTON-SALEM	NC	SCHOOLS OF MEDICINE	271570001	UNITED STATES	N	9/1/19 0:00	8/31/20 0:00	279	Non-SBIR/STTR	2019	249000	NIDA	185484	coastal
NIDCD	8292330	8/29/11 0:00		4R00DC010206-03	4	R00	DC	10206	3		SKLARE, DAN	9/3/11 0:00	8/31/14 0:00	NSS	9646816	5	OTHER HEALTH PROFESSIONS	790934285	NPU8ULVAAS23	790934285	NPU8ULVAAS23	US	38.992333	-76.952986	820102	U OF MARYLAND COLL PARK		Non-Elite	male	100	COLLEGE PARK	MD	SCHOOLS OF ARTS AND SCIENCES	207420001	UNITED STATES	N	9/3/11 0:00	8/31/12 0:00	173	Non-SBIR/STTR	2011	246000	NIDCD		coastal
NIDCR	8206325	1/6/11 0:00	PA-10-063	4R00DE018085-03	4	R00	DE	18085	3		HARRIS, EMILY L	1/1/11 0:00	12/31/13 0:00	NSS	8608310	18	NONE	4514360	MKAGLD59JRL1	4514360	MKAGLD59JRL1	US	40.440909	-79.959125	2059802	U OF PITTSBURGH AT PITTSBURGH		Elite	female	93	PITTSBURGH	PA	SCHOOLS OF DENTISTRY/ORAL HYGN	152133320	UNITED STATES	N	1/1/11 0:00	12/31/11 0:00	121	Non-SBIR/STTR	2011	239275	NIDCR		coastal
NIAAA	9752706	8/29/18 0:00	PA-16-077	4R00AA024778-02	4	R00	AA	24778	2		MATOCHIK, JOHN A	9/1/18 0:00	8/31/21 0:00	NSS	11666542	6	RADIATION-DIAGNOSTIC/ONCOLOGY	41096314	MW8JHK6ZYEX8	41096314	MW8JHK6ZYEX8	US	39.745098	-104.837605	1199905	U OF COLORADO DENVER		Non-Elite	male	100	Aurora	CO	SCHOOLS OF MEDICINE	800452570	UNITED STATES	N	9/1/18 0:00	8/31/19 0:00	273	Non-SBIR/STTR	2018	249000	NIAAA	160128	coastal
NCI	9389569	3/20/17 0:00	PA-14-042	4R00CA197315-04	4	R00	CA	197315	4		SATHYAMOORTHY, NEERAJA	4/1/17 0:00	3/31/20 0:00	NSS	10873862	11	UROLOGY	77758407	HJMKEF7EJW69	77758407	HJMKEF7EJW69	US	41.502739	-81.607334	218601	CASE WESTERN RESERVE U		Non-Elite	female	98	CLEVELAND	OH	SCHOOLS OF MEDICINE	441061712	UNITED STATES	N	4/1/17 0:00	3/31/18 0:00	396	Non-SBIR/STTR	2017	249000	NCI	157098	#N/A
NIMH	9783964	9/20/18 0:00	PA-16-193	4R00MH111805-03	4	R00	MH	111805	3		GARVEY, MARJORIE A	9/30/18 0:00	8/31/21 0:00	NSS	10585072	3	OTHER BASIC SCIENCES	96997515	NPSNT86JKN51	96997515	NPSNT86JKN51	US	45.49882	-122.685647	6297007	OREGON HEALTH & SCI U		Non-Elite	female	98	PORTLAND	OR	SCHOOLS OF MEDICINE	972393098	UNITED STATES	N	9/30/18 0:00	8/31/19 0:00	242	Non-SBIR/STTR	2018	249000	NIMH	161688	#N/A
NHLBI	9967229	8/4/19 0:00	PA-16-193	4R00HL133458-03	4	R00	HL	133458	3		YANG, YU-CHUNG	9/1/17 0:00	7/31/22 0:00	NSS	12671348	53	BIOLOGY	73371346	H59JKGFZKHL7	73371346	H59JKGFZKHL7	US	32.762178	-117.069156	513614	SAN DIEGO STATE U		Non-Elite	female	98	SAN DIEGO	CA	SCHOOLS OF ARTS AND SCIENCES	921821901	UNITED STATES	N	8/15/19 0:00	7/31/20 0:00	837	Non-SBIR/STTR	2019	249000	NHLBI	211018	coastal
NIDA	9657860	7/13/18 0:00	PA-15-083	4R00DA039253-03	4	R00	DA	39253	3		SORENSEN, ROGER	8/1/18 0:00	7/31/21 0:00	NSS	9169111	5	PHARMACOLOGY	555917996	KABJZBBJ4B54	555917996	KABJZBBJ4B54	US	44.975143	-93.227003	1450402	U OF MINNESOTA		Non-Elite	male	99	MINNEAPOLIS	MN	SCHOOLS OF MEDICINE	554552070	UNITED STATES	N	8/1/18 0:00	7/31/19 0:00	279	Non-SBIR/STTR	2018	249000	NIDA	179089	coastal
NICHD	8512884	7/31/12 0:00	PA-11-197	4R00HD065839-03	4	R00	HD	65839	3		MILLER, BRETT	8/10/10 0:00	7/31/15 0:00	NSS	6986223	10	PSYCHOLOGY	130029205	T3NGNR66YK89	130029205	T3NGNR66YK89	US	40.740542	-74.172677	1196204	RUTGERS THE STATE U OF NJ NEWARK		Non-Elite	male	99	NEWARK	NJ	SCHOOLS OF ARTS AND SCIENCES	71021808	UNITED STATES	N	8/1/12 0:00	7/31/13 0:00	865	Non-SBIR/STTR	2012	249000	NICHD	160645	coastal
NICHD	8235233	5/5/11 0:00	PA-10-063	4R00HD061752-03	4	R00	HD	61752	3		BURES, REGINA M	8/15/09 0:00	12/31/13 0:00	NSS	9646236	4	MISCELLANEOUS	608195277	D3LHU66KBLD5	608195277	D3LHU66KBLD5	US	35.9316	-79.057377	578206	U OF NORTH CAROLINA CHAPEL HILL		Elite	male	96	CHAPEL HILL	NC	SCHOOLS OF ARTS AND SCIENCES	275995023	UNITED STATES	N	1/1/11 0:00	12/31/11 0:00	865	Non-SBIR/STTR	2011	249000	NICHD		#N/A
NCCIH	9539240	8/25/17 0:00	PA-14-042	4R00AT008831-03	4	R00	AT	8831	3		MUDD, LANAY MARIE	9/1/17 0:00	8/31/20 0:00	NSS	11545824	3	Unavailable	96997515	NPSNT86JKN51	96997515	NPSNT86JKN51	US	45.49882	-122.685647	6297007	OREGON HEALTH & SCI U		Non-Elite	female	97	PORTLAND	OR	Domestic Higher Education	972393098	UNITED STATES	N	9/1/17 0:00	8/31/18 0:00	213	Non-SBIR/STTR	2017	249000	NCCIH	161688	#N/A
NHLBI	9849873	2/23/19 0:00	PA-16-193	4R00HL133414-03	4	R00	HL	133414	3		GALIS, ZORINA S	4/1/19 0:00	3/31/22 0:00	NSS	11623409	6	OTHER HEALTH PROFESSIONS	64234610	LMLUKUPJJ9N3	64234610	LMLUKUPJJ9N3	US	32.728201	-97.112604	578402	U OF TEXAS ARLINGTON		Non-Elite	female	55	ARLINGTON	TX	SCHOOLS OF NURSING	760190145	UNITED STATES	N	4/1/19 0:00	3/31/20 0:00	837	Non-SBIR/STTR	2019	248291	NHLBI	161534	#N/A
NHLBI	9087376	7/15/15 0:00	PA-11-197	4R00HL123623-02	4	R00	HL	123623	2		WANG, WAYNE C	8/1/14 0:00	6/30/18 0:00	NSS	10604236	1	BIOCHEMISTRY	68552207	L6NFUM28LQM5	68552207	L6NFUM28LQM5	US	38.664368	-90.323797	9083901	WASHINGTON U		Non-Elite	male	99	SAINT LOUIS	MO	SCHOOLS OF MEDICINE	631304862	UNITED STATES	N	7/15/15 0:00	6/30/16 0:00	837	Non-SBIR/STTR	2015	249000	NHLBI	163279	coastal
NIA	9069262	7/14/15 0:00	PA-11-197	4R00AG043550-03	4	R00	AG	43550	3		GUO, MAX	7/15/15 0:00	3/31/18 0:00	NSS	8148709	7	Unavailable	76593722	Z1L9F1MM1RY3	76593722	Z1L9F1MM1RY3	US	42.337481	-71.104964	1504801	BOSTON CHILDRENS HOSP		Elite	male	99	BOSTON	MA	Independent Hospitals	21155724	UNITED STATES	N	7/15/15 0:00	3/31/16 0:00	866	Non-SBIR/STTR	2015	249000	NIA	162556	coastal
NCCIH	8141593	9/17/10 0:00	PA-07-297	4R00AT004945-03	4	R00	AT	4945	3		GLOWA, JOHN R	9/30/08 0:00	6/30/13 0:00	ZAT1-LD(25)	7301925	4	PSYCHIATRY	44387793	TP7EK8DZV6N5	44387793	TP7EK8DZV6N5	US	36.007766	-78.926475	2221101	DUKE U		Elite	male	100	DURHAM	NC	SCHOOLS OF MEDICINE	277054673	UNITED STATES	N	7/1/10 0:00	6/30/11 0:00	213	Non-SBIR/STTR	2010	247599	NCCIH		#N/A
NIAAA	9062560	5/15/15 0:00	PA-11-197	4R00AA021780-02	4	R00	AA	21780	2		LIU, QI-YING	7/1/12 0:00	4/30/18 0:00	NSS	7790724	52	PSYCHOLOGY	804355790	UYTTZT6G9DT1	804355790	UYTTZT6G9DT1	US	32.876991	-117.24087	577507	U OF CALIFORNIA SAN DIEGO		Elite	female	94	LA JOLLA	CA	SCHOOLS OF ARTS AND SCIENCES	920930621	UNITED STATES	N	5/15/15 0:00	4/30/16 0:00	273	Non-SBIR/STTR	2015	248936	NIAAA	220121	#N/A
NIAMS	8445560	4/12/12 0:00		4R00AR060873-02	4	R00	AR	60873	2		TSENG, HUNG H	4/12/12 0:00	3/31/15 0:00	NSS	7539537	3	DERMATOLOGY	42250712	GM1XX56LEP58	42250712	GM1XX56LEP58	US	39.953462	-75.193983	6463801	U OF PENNSYLVANIA		Elite	female	99	PHILADELPHIA	PA	SCHOOLS OF MEDICINE	191046205	UNITED STATES	N	4/12/12 0:00	3/31/13 0:00	846	Non-SBIR/STTR	2012	249000	NIAMS	187500	#N/A
NIA	9419489	2/23/17 0:00	PA-14-042	4R00AG049056-03	4	R00	AG	49056	3		MILLER, MARILYN	3/1/17 0:00	2/29/20 0:00	NSS	12085130	8	Unavailable	73130411	FLJ7DQKLL226	73130411	FLJ7DQKLL226	US	42.363198	-71.068772	4907701	MASSACHUSETTS GENERAL HOSP		Elite	female	97	BOSTON	MA	Independent Hospitals	21142621	UNITED STATES	N	3/1/17 0:00	2/28/18 0:00	866	Non-SBIR/STTR	2017	249000	NIA	148105	#N/A
NHLBI	7651867	9/24/08 0:00	PA-07-297	4R00HL087621-03	4	R00	HL	87621	3		SCHRAMM, CHARLENE A	9/25/08 0:00	7/31/11 0:00	NSS	2046820	5	Unavailable	77333797	NGCNCJ1X6XA4	77333797	NGCNCJ1X6XA4	US	35.482988	-97.49781	6239601	OKLAHOMA MED RES FOUNDATION		Non-Elite	female	92	OKLAHOMA CITY	OK	Research Institutes	731045005	UNITED STATES	N	9/25/08 0:00	7/31/09 0:00	837	Non-SBIR/STTR	2008	249000	NHLBI		#N/A
NHGRI	9443700	5/1/17 0:00	PA-14-042	4R00HG007940-03	4	R00	HG	7940	3		WELLINGTON, CHRISTOPHER	5/1/17 0:00	4/30/20 0:00	NSS	11581475	1	GENETICS	68552207	L6NFUM28LQM5	68552207	L6NFUM28LQM5	US	38.664368	-90.323797	9083901	WASHINGTON U		Non-Elite	male	99	SAINT LOUIS	MO	SCHOOLS OF MEDICINE	631304862	UNITED STATES	N	5/1/17 0:00	4/30/18 0:00	172	Non-SBIR/STTR	2017	247276	NHGRI	197033	coastal
NINR	10397827	##########	PA-19-129	4R00NR018886-02	4	R00	NR	18886	2		HUSS, KAREN	9/8/20 0:00	##########	Nursing Science Review Committee[NRRC(77)]	15222580	11	NONE	77758407	HJMKEF7EJW69	77758407	HJMKEF7EJW69	US	41.502739	-81.607334	218601	CASE WESTERN RESERVE U		Non-Elite	female	98	CLEVELAND	OH	SCHOOLS OF NURSING	441061712	UNITED STATES	N	8/1/21 0:00	##########	361	Other Research-Related	2021	248999	NINR	154658	#N/A
NICHD	7799992	6/11/09 0:00		4R00HD055053-02	4	R00	HD	55053	2		ILEKIS, JOHN V	6/13/08 0:00	5/31/12 0:00	NSS	8614486	3	NONE	96997515	NPSNT86JKN51	96997515	NPSNT86JKN51	US	45.49882	-122.685647	6297007	OREGON HEALTH & SCI U		Non-Elite	female	62	PORTLAND	OR	SCHOOLS OF MEDICINE	972393098	UNITED STATES	N	6/10/09 0:00	5/31/10 0:00	865	Non-SBIR/STTR	2009	249000	NICHD		coastal
NIAMS	9933489	9/18/19 0:00	PA-16-193	4R00AR070905-03	4	R00	AR	70905	3		KIRILUSHA, ANTHONY G	9/18/19 0:00	8/31/22 0:00	NSS	11743884	4	BIOCHEMISTRY	79289626	Z3FGN9MF92U2	079289626; 948117312	J2KGU972RXG3; Z3FGN9MF92U2	US	44.045509	-123.069741	6297005	U OF OREGON		Non-Elite	male	99	EUGENE	OR	ORGANIZED RESEARCH UNITS	974035219	UNITED STATES	N	9/18/19 0:00	8/31/20 0:00	846	Non-SBIR/STTR	2019	249000	NIAMS	187763	coastal
NIDDK	8631187	7/8/13 0:00	PA-10-063	4R00DK088589-04	4	R00	DK	88589	4		PERRIN, PETER J	7/10/13 0:00	6/30/16 0:00	NSS	10018151	2	Unavailable	64367329	FF1XVJMDYVR1	64367329	FF1XVJMDYVR1	US	40.067891	-75.091086	1190002	RES INST OF FOX CHASE CAN CTR		Non-Elite	male	99	PHILADELPHIA	PA	Research Institutes	191112434	UNITED STATES	N	7/10/13 0:00	6/30/14 0:00	847	Non-SBIR/STTR	2013	249000	NIDDK	139496	#N/A
NHLBI	8458298	8/17/12 0:00		4R00HL098276-03	4	R00	HL	98276	3		GALIS, ZORINA S	6/1/10 0:00	5/31/15 0:00	NSS	9758170	2	NEUROSCIENCES	62761671	Z1H9VJS8NG16	62761671	Z1H9VJS8NG16	US	41.664405	-91.542152	3972901	U OF IOWA		Non-Elite	male	98	IOWA CITY	IA	SCHOOLS OF MEDICINE	522421320	UNITED STATES	N	8/17/12 0:00	5/31/13 0:00	837	Non-SBIR/STTR	2012	249000	NHLBI	186854	coastal
NIEHS	9828805	2/5/19 0:00	PA-16-077	4R00ES026198-03	4	R00	ES	26198	3		BOYLES, ABEE	2/15/19 0:00	1/31/22 0:00	NSS	10926177	12	Unavailable	73133571	GNJ7BBP73WE9	73133571	GNJ7BBP73WE9	US	42.275494	-83.743038	1506502	U OF MICHIGAN AT ANN ARBOR		Elite	female	99	ANN ARBOR	MI	Domestic Higher Education	481091276	UNITED STATES	N	2/15/19 0:00	1/31/20 0:00	113	Non-SBIR/STTR	2019	249000	NIEHS	159616	#N/A
NHLBI	8846820	6/25/14 0:00	PA-10-063	4R00HL109212-03	4	R00	HL	109212	3		LATHROP, DAVID A	7/15/11 0:00	6/30/17 0:00	NSS	10649219	18	ANESTHESIOLOGY	9214214	HJD6G4D6TJY5	9214214	HJD6G4D6TJY5	US	37.426852	-122.17047	8046501	STANFORD U		Elite	male	99	STANFORD	CA	SCHOOLS OF MEDICINE	943052004	UNITED STATES	N	7/1/14 0:00	6/30/15 0:00	837	Non-SBIR/STTR	2014	248999	NHLBI	158984	coastal
NIDA	8585390	3/18/13 0:00	PA-11-197	4R00DA031699-03	4	R00	DA	31699	3		SORENSEN, ROGER	4/1/13 0:00	3/31/16 0:00	NSS	8839585	5	ANESTHESIOLOGY	965717143	GTNBNWXJ12D5	965717143	DWH7MSXKA2A8; GTNBNWXJ12D5	US	36.143381	-86.803365	8721001	VANDERBILT U		Non-Elite	male	100	Nashville	TN	SCHOOLS OF MEDICINE	372032408	UNITED STATES	N	4/1/13 0:00	3/31/14 0:00	279	Non-SBIR/STTR	2013	249000	NIDA	197136	#N/A
NHLBI	10203182	8/13/20 0:00	PA-16-077	4R00HL135258-03	4	R00	HL	135258	3		SUTLIFF, ROY L	8/15/20 0:00	7/31/23 0:00	NSS	11794105	1	Unavailable	71284913	JZD1HLM2ZU83	71284913	JZD1HLM2ZU83	US	39.140663	-84.501007	615001	CINCINNATI CHILDRENS HOSP MED CTR		Non-Elite	female	86	CINCINNATI	OH	Independent Hospitals	452293039	UNITED STATES	N	8/15/20 0:00	7/31/21 0:00	838	Non-SBIR/STTR	2020	249000	NHLBI	156604	coastal
NIA	9107608	8/31/15 0:00	PA-11-197	4R00AG042483-03	4	R00	AG	42483	3		WISE, BRADLEY C	9/1/15 0:00	5/31/18 0:00	NSS	10382657	13	NEUROLOGY	621889815	QHF5ZZ114M72	621889815	QHF5ZZ114M72	US	40.8415	-73.9414	1833205	COLUMBIA U HEALTH SCI		Elite	female	78	NEW YORK	NY	SCHOOLS OF MEDICINE	100323725	UNITED STATES	N	9/1/15 0:00	5/31/16 0:00	866	Non-SBIR/STTR	2015	248894	NIA	155559	coastal
NCI	10168832	7/13/20 0:00	PA-18-398	4R00CA241297-02	4	R00	CA	241297	2		JHAPPAN, CHAMELLI	7/13/20 0:00	6/30/23 0:00	NSS	12566722	32	Unavailable	27176833	NPH1VN32EWN5	27176833	NPH1VN32EWN5	US	34.127716	-117.972442	3058203	BECKMAN RES INST/CITY OF HOPE		Non-Elite	male	70	DUARTE	CA	Research Institutes	910103012	UNITED STATES	N	7/13/20 0:00	6/30/21 0:00	398	Non-SBIR/STTR	2020	249000	NCI	141477	coastal
NCI	9707997	8/1/18 0:00	PA-16-077	4R00CA212200-03	4	R00	CA	212200	3		WATSON, JOANNA M	8/1/18 0:00	7/31/21 0:00	NSS	11602666	28	Unavailable	75307785	NCSMA19DF7E6	75307785	NCSMA19DF7E6	US	34.076544	-118.380004	1225501	CEDARS SINAI MED CTR		Non-Elite	female	99	LOS ANGELES	CA	Independent Hospitals	900481804	UNITED STATES	N	8/1/18 0:00	7/31/19 0:00	395	Non-SBIR/STTR	2018	249000	NCI	146471	#N/A
NINDS	9487536	7/17/17 0:00	PA-14-042	4R00NS089943-03	4	R00	NS	89943	3		RIDDLE, ROBERT D	9/30/14 0:00	5/31/20 0:00	NST-2 Study Section [NST-2]	10868432	7	PHYSIOLOGY	5436803	KG76WYENL5K1	5436803	KG76WYENL5K1	US	42.050479	-87.680046	6144650	NORTHWESTERN U		Elite	male	82	CHICAGO	IL	SCHOOLS OF MEDICINE	606114579	UNITED STATES	N	6/1/17 0:00	5/31/18 0:00	853	Non-SBIR/STTR	2017	249000	NINDS	186793	coastal
NIBIB	9475982	5/26/17 0:00	PA-14-042	4R00EB019482-03	4	R00	EB	19482	3		WANG, SHUMIN	7/1/17 0:00	6/30/20 0:00	NSS	11817351	8	Unavailable	73130411	FLJ7DQKLL226	73130411	FLJ7DQKLL226	US	42.363198	-71.068772	4907701	MASSACHUSETTS GENERAL HOSP		Elite	male	99	BOSTON	MA	Independent Hospitals	21142621	UNITED STATES	N	7/1/17 0:00	6/30/18 0:00	286	Non-SBIR/STTR	2017	248856	NIBIB	145530	#N/A
NCI	7917101	9/15/09 0:00	PA-07-297	4R00CA129613-03	4	R00	CA	129613	3		SPALHOLZ, BARBARA A	5/23/08 0:00	8/31/12 0:00	Institutional Training and Education Study Section (F)[NCI-F]	7691254	2	ANATOMY/CELL BIOLOGY	603847393	MQE2JHHJW9Q8	603847393	MQE2JHHJW9Q8	US	42.2802	-71.758245	850903	U OF MASSACHUSETTS MED SCH WORCESTER		Non-Elite	male	99	WORCESTER	MA	SCHOOLS OF MEDICINE	16550002	UNITED STATES	N	9/15/09 0:00	8/31/10 0:00	398	Non-SBIR/STTR	2009	248999	NCI		coastal
NINDS	9825983	12/13/18 0:00	PA-16-193	4R00NS097620-03	4	R00	NS	97620	3		CHEN, DAOFEN	12/15/17 0:00	11/30/21 0:00	NST-2 Study Section [NST-2]	14228365	28	Unavailable	75307785	NCSMA19DF7E6	75307785	NCSMA19DF7E6	US	34.076544	-118.380004	1225501	CEDARS SINAI MED CTR		Non-Elite	male	100	LOS ANGELES	CA	Independent Hospitals	900481804	UNITED STATES	N	12/15/18 0:00	11/30/19 0:00	853	Non-SBIR/STTR	2019	248999	NINDS	203080	#N/A
NHLBI	8166085	3/29/11 0:00	PA-07-297	4R00HL094708-03	4	R00	HL	94708	3		LUNDBERG, MARTHA	4/1/11 0:00	3/31/14 0:00	NSS	6994702	5	BIOCHEMISTRY	937639060	E8VWJXMMUQ67	937639060	E8VWJXMMUQ67	US	43.04575	-88.020374	46001	MED COLL OF WISCONSIN		Non-Elite	female	99	MILWAUKEE	WI	SCHOOLS OF MEDICINE	532263548	UNITED STATES	N	4/1/11 0:00	3/31/12 0:00	837	Non-SBIR/STTR	2011	234019	NHLBI		#N/A
NCI	10216420	9/11/20 0:00	PA-18-398	4R00CA225633-03	4	R00	CA	225633	3		AMIN, ANOWARUL	9/11/20 0:00	8/31/23 0:00	NSS	14359954	6	BIOCHEMISTRY	939017877	H1HYA8Z1NTM5	939017877	H1HYA8Z1NTM5	US	38.040959	-84.505885	2793601	U OF KENTUCKY		Non-Elite	male	75	LEXINGTON	KY	SCHOOLS OF MEDICINE	405260001	UNITED STATES	N	9/11/20 0:00	8/31/21 0:00	396	Non-SBIR/STTR	2020	248960	NCI	162719	coastal
NIGMS	10359857	##########	PA-18-398	4R00GM134153-03	4	R00	GM	134153	3		REDDY, MICHAEL K	##########	##########	NSS	12510292	7	MICROBIOLOGY/IMMUN/VIROLOGY	605799469	HD1WMN6945W6	605799469	HD1WMN6945W6	US	47.660307	-122.31517	9087701	U OF WASHINGTON		Elite	female	98	SEATTLE	WA	SCHOOLS OF MEDICINE	981959472	UNITED STATES	N	4/1/21 0:00	##########	859	Non-SBIR/STTR	2021	248999	NIGMS	155596	#N/A
NHLBI	10138117	5/16/20 0:00	PA-16-193	4R00HL141583-03	4	R00	HL	141583	3		HASAN, AHMED A K	5/15/20 0:00	4/30/23 0:00	NSS	16179975	1	BIOCHEMISTRY	800772337	FPCUDWBE7DX2	800772337	FPCUDWBE7DX2	US	32.398669	-95.243419	578420	U OF TEXAS HLTH CTR AT TYLER		Non-Elite	female	76	TYLER	TX	HOSPITALS	757083154	UNITED STATES	N	5/18/20 0:00	4/30/21 0:00	837	Non-SBIR/STTR	2020	249000	NHLBI	169388	#N/A
NIA	9568855	9/23/17 0:00	PA-14-042	4R00AG049126-03	4	R00	AG	49126	3		GUO, MAX	9/30/17 0:00	5/31/20 0:00	NSS	10392575	18	INTERNAL MEDICINE/MEDICINE	4514360	MKAGLD59JRL1	4514360	MKAGLD59JRL1	US	40.440909	-79.959125	2059802	U OF PITTSBURGH AT PITTSBURGH		Elite	female	98	PITTSBURGH	PA	SCHOOLS OF MEDICINE	152133320	UNITED STATES	N	9/30/17 0:00	5/31/18 0:00	866	Non-SBIR/STTR	2017	248867	NIA	160043	#N/A
NHGRI	10540473	5/2/22	PA-19-130	4R00HG010909-03	4	R00	HG	10909	3		SOFIA, HEIDI J	5/9/22	4/30/25	NSS	14192253	13	INTERNAL MEDICINE/MEDICINE	621889815	QHF5ZZ114M72	621889815	QHF5ZZ114M72	US	40.8415	-73.9414	1833205	COLUMBIA U HEALTH SCI		Elite	female	97	NEW YORK	NY	SCHOOLS OF MEDICINE	100323725	UNITED STATES	N	5/9/22	4/30/23	172	Non-SBIR/STTR	2022	249000	NHGRI	185438	coastal
NCI	9320627	9/13/16 0:00	PA-11-197	4R00CA178191-03	4	R00	CA	178191	3		MUFSON, R ALLAN	9/13/16 0:00	8/31/19 0:00	NSS	10335563	3	PHARMACOLOGY	969663814	NNFQH1JAPEP3	969663814	NNFQH1JAPEP3	US	29.643443	-82.349637	513806	U OF FLORIDA		Non-Elite	female	98	GAINESVILLE	FL	SCHOOLS OF MEDICINE	326115500	UNITED STATES	N	9/13/16 0:00	8/31/17 0:00	395	Non-SBIR/STTR	2016	252971	NCI	169590	coastal
NIGMS	10396130	##########	PA-18-398	4R00GM134187-02	4	R00	GM	134187	2		YEH, ALVIN TIEN-WEI	8/1/19 0:00	##########	NSS	14511977	2	CHEMISTRY	50299031	K51LECU1G8N3	50299031	K51LECU1G8N3	US	29.717236	-95.402761	9291001	RICE U		Non-Elite	female	98	HOUSTON	TX	SCHOOLS OF ARTS AND SCIENCES	770051827	UNITED STATES	N	8/1/21 0:00	##########	859	Non-SBIR/STTR	2021	249000	NIGMS	180746	#N/A
NIAID	10660297	8/8/22	PA-20-188	4R00AI159136-02	4	R00	AI	159136	2		LANE, MARY CHELSEA	8/8/22	7/31/24	ZAI1-SRC(99)	12572817	6	MICROBIOLOGY/IMMUN/VIROLOGY	41096314	MW8JHK6ZYEX8	41096314	MW8JHK6ZYEX8	US	39.745098	-104.837605	1199905	U OF COLORADO DENVER		Non-Elite	female	98	Aurora	CO	SCHOOLS OF MEDICINE	800452570	UNITED STATES	N	8/8/22	7/31/23	855	Non-SBIR/STTR	2022	248999	NIAID	160128	#N/A
NIMH	8016840	4/27/10 0:00	PA-06-133	4R00MH080076-02	4	R00	MH	80076	2		SESMA, MICHAEL A	5/1/10 0:00	4/30/13 0:00	NSS	8653981	3	PSYCHOLOGY	47120084	TX2DAGQPENZ5	47120084	TX2DAGQPENZ5	US	38.543366	-121.72946	577503	U OF CALIFORNIA AT DAVIS		Non-Elite	female	98	DAVIS	CA	SCHOOLS OF ARTS AND SCIENCES	956186153	UNITED STATES	N	5/1/10 0:00	4/30/11 0:00	242	Non-SBIR/STTR	2010	249000	NIMH		#N/A
NICHD	10620890	5/25/22	PA-18-398	4R00HD097302-03	4	R00	HD	97302	3		ILEKIS, JOHN V	6/1/22	5/31/25	ZHD1-SRC(99)	10926689	45	PEDIATRICS	46705849	MJC5FCYQTPE6	46705849	MJC5FCYQTPE6	US	33.64852	-117.82136	577504	U OF CALIFORNIA IRVINE		Non-Elite	female	97	IRVINE	CA	SCHOOLS OF MEDICINE	926970001	UNITED STATES	N	6/1/22	5/31/23	865	Non-SBIR/STTR	2022	248990	NICHD	165621	#N/A
NINDS	9444083	3/15/17 0:00	PA-14-042	4R00NS091486-03	4	R00	NS	91486	3		GUBITZ, AMELIE	4/1/17 0:00	3/31/20 0:00	NSS	11337375	3	NEUROSCIENCES	53284659	R8JEVL4ULGB7	53284659	R8JEVL4ULGB7	US	39.948207	-75.157825	4050801	THOMAS JEFFERSON U		Non-Elite	male	99	PHILADELPHIA	PA	SCHOOLS OF MEDICINE	191074418	UNITED STATES	N	4/1/17 0:00	3/31/18 0:00	853	Non-SBIR/STTR	2017	248999	NINDS	181961	coastal
NHLBI	8803861	4/9/14 0:00	PA-10-063	4R00HL111206-03	4	R00	HL	111206	3		LIU, LIJUAN	4/8/14 0:00	3/31/17 0:00	NSS	10098932	13	PATHOLOGY	621889815	QHF5ZZ114M72	621889815	QHF5ZZ114M72	US	40.8415	-73.9414	1833205	COLUMBIA U HEALTH SCI		Elite	female	99	NEW YORK	NY	SCHOOLS OF MEDICINE	100323725	UNITED STATES	N	4/8/14 0:00	3/31/15 0:00	837	Non-SBIR/STTR	2014	249000	NHLBI	155625	coastal
NCI	8990209	3/26/15 0:00	PA-11-197	4R00CA166643-03	4	R00	CA	166643	3		MIETZ, JUDY	9/23/12 0:00	3/31/18 0:00	NSS	6727210	3	BIOCHEMISTRY	16060860	YXJGGNC5J269	16060860	YXJGGNC5J269	US	39.026584	-94.636347	1484303	U OF KANSAS MED CTR		Non-Elite	female	93	KANSAS CITY	KS	SCHOOLS OF MEDICINE	661608500	UNITED STATES	N	4/1/15 0:00	3/31/16 0:00	393	Non-SBIR/STTR	2015	249000	NCI	164900	#N/A
NICHD	10371311	##########	PA-19-130	4R00HD099387-02	4	R00	HD	99387	2		OCTOBER, TESSIE	4/1/21 0:00	##########	NSS	12323539	18	PEDIATRICS	9214214	HJD6G4D6TJY5	9214214	HJD6G4D6TJY5	US	37.426852	-122.17047	8046501	STANFORD U		Elite	male	100	STANFORD	CA	SCHOOLS OF MEDICINE	943052004	UNITED STATES	N	4/1/21 0:00	##########	865	Non-SBIR/STTR	2021	248992	NICHD	158065	coastal
NIEHS	9206264	4/27/16 0:00	PA-11-197	4R00ES023498-03	4	R00	ES	23498	3		SCHUG, THADDEUS	5/1/16 0:00	4/30/19 0:00	NSS	9437907	7	PUBLIC HEALTH & PREV MEDICINE	605799469	HD1WMN6945W6	605799469	HD1WMN6945W6	US	47.660307	-122.315168	9087701	U OF WASHINGTON		Elite	male	69	SEATTLE	WA	SCHOOLS OF PUBLIC HEALTH	981959472	UNITED STATES	N	5/1/16 0:00	4/30/17 0:00	113	Non-SBIR/STTR	2016	248995	NIEHS	161162	#N/A
NIA	9993672	8/31/19 0:00	PA-16-193	4R00AG056670-03	4	R00	AG	56670	3		STOECKEL, LUKE	9/1/19 0:00	5/31/22 0:00	NSS	14769519	10	NEUROLOGY	129348186	TNKGNDAWB445	129348186	TNKGNDAWB445	US	40.264414	-76.674014	1524204	PENNSYLVANIA STATE		Non-Elite	male	99	HERSHEY	PA	SCHOOLS OF MEDICINE	170332360	UNITED STATES	N	9/1/19 0:00	5/31/20 0:00	866	Non-SBIR/STTR	2019	233368	NIA	147403	coastal
NCCIH	8727214	9/4/13 0:00	PA-10-063	4R00AT006704-04	4	R00	AT	6704	4		WEBER, WENDY J	8/1/11 0:00	7/31/16 0:00	ZAT1-PK(16)	10371173	7	INTERNAL MEDICINE/MEDICINE	63690705	YND4PLMC9AN7	63690705	YND4PLMC9AN7	US	33.50591	-86.799772	1288803	U OF ALABAMA AT BIRMINGHAM		Non-Elite	male	100	BIRMINGHAM	AL	SCHOOLS OF MEDICINE	352940001	UNITED STATES	N	8/1/13 0:00	7/31/14 0:00	213	Non-SBIR/STTR	2013	241736	NCCIH	141539	coastal
NINDS	8892350	7/25/14 0:00	PA-11-197	4R00NS078115-03	4	R00	NS	78115	3		GNADT, JAMES W	4/1/12 0:00	3/31/17 0:00	NST-2 Study Section [NST-2]	8711227	12	NEUROSCIENCES	121911077	M5SZJ6VHUHN8	121911077	M5SZJ6VHUHN8	US	40.669895	-73.974354	5998304	NEW YORK U SCH OF MED		Elite	male	99	NEW YORK	NY	SCHOOLS OF MEDICINE	10016	UNITED STATES	N	4/1/14 0:00	3/31/15 0:00	853	Non-SBIR/STTR	2014	249000	NINDS	189921	#N/A
NCI	10245783	9/16/20 0:00	PA-19-130	4R00CA241357-02	4	R00	CA	241357	2		KUO, LILLIAN S	9/30/20 0:00	8/31/23 0:00	NSS	12098579	45	BIOCHEMISTRY	46705849	MJC5FCYQTPE6	46705849	MJC5FCYQTPE6	US	33.64852	-117.82136	577504	U OF CALIFORNIA IRVINE		Non-Elite	male	99	IRVINE	CA	SCHOOLS OF ARTS AND SCIENCES	926970001	UNITED STATES	N	9/30/20 0:00	8/31/21 0:00	396	Non-SBIR/STTR	2020	248999	NCI	214872	coastal
NHLBI	8289715	7/29/11 0:00	PA-10-063	4R00HL094767-03	4	R00	HL	94767	3		PAPANICOLAOU, GEORGE	8/1/11 0:00	6/30/14 0:00	NSS	8468286	18	INTERNAL MEDICINE/MEDICINE	4514360	MKAGLD59JRL1	4514360	MKAGLD59JRL1	US	40.440909	-79.959125	2059802	U OF PITTSBURGH AT PITTSBURGH		Elite	female	98	PITTSBURGH	PA	SCHOOLS OF MEDICINE	152133320	UNITED STATES	N	8/1/11 0:00	6/30/12 0:00	837	Non-SBIR/STTR	2011	249000	NHLBI		#N/A
NIMH	8125759	9/3/10 0:00		4R00MH082104-03	4	R00	MH	82104	3		FRIEDMAN-HILL, STACIA	9/8/10 0:00	8/31/13 0:00	NSS	8920899	33	NONE	92530369	RN64EPNH8JC6	92530369	RN64EPNH8JC6	US	34.070199	-118.45102	577505	U OF CALIFORNIA LOS ANGELES		Elite	male	100	LOS ANGELES	CA	SCHOOLS OF MEDICINE	900952000	UNITED STATES	N	9/8/10 0:00	8/31/11 0:00	242	Non-SBIR/STTR	2010	249000	NIMH		coastal
NIEHS	8434995	5/8/12 0:00	PA-10-063	4R00ES018890-03	4	R00	ES	18890	3		DILWORTH, CAROLINE H	9/1/10 0:00	4/30/15 0:00	NSS	9939675	13	PUBLIC HEALTH & PREV MEDICINE	621889815	QHF5ZZ114M72	621889815	QHF5ZZ114M72	US	40.8415	-73.9414	1833205	COLUMBIA U HEALTH SCI		Elite	female	99	NEW YORK	NY	SCHOOLS OF PUBLIC HEALTH	100323725	UNITED STATES	N	5/8/12 0:00	4/30/13 0:00	113	Non-SBIR/STTR	2012	247157	NIEHS	154473	coastal
NIAID	8203927	1/14/11 0:00	PA-10-063	4R00AI085107-02	4	R00	AI	85107	2		MCGUGAN, GLEN C	5/1/10 0:00	12/31/12 0:00	NSS	6439809	33	MICROBIOLOGY/IMMUN/VIROLOGY	92530369	RN64EPNH8JC6	92530369	RN64EPNH8JC6	US	34.070199	-118.45102	577505	U OF CALIFORNIA LOS ANGELES		Elite	female	99	LOS ANGELES	CA	SCHOOLS OF MEDICINE	900952000	UNITED STATES	N	1/15/11 0:00	12/31/11 0:00	855	Non-SBIR/STTR	2011	246841	NIAID		#N/A
NINDS	8032665	2/26/10 0:00	PA-09-036	4R00NS060764-03	4	R00	NS	60764	3		JACOBS, TOM P	4/1/08 0:00	3/31/13 0:00	NSS	1893060	25	NEUROLOGY	41294109	F27KDXZMF9Y8	41294109	F27KDXZMF9Y8	US	43.131774	-77.63546	7047101	U OF ROCHESTER		Non-Elite	male	99	ROCHESTER	NY	SCHOOL OF MEDICINE & DENTISTRY	146270140	UNITED STATES	N	4/1/10 0:00	3/31/11 0:00	853	Non-SBIR/STTR	2010	249000	NINDS		#N/A
NICHD	7810286	9/11/09 0:00	PA-09-036	4R00HD058070-03	4	R00	HD	58070	3		TASCA, RICHARD J	1/1/09 0:00	8/31/12 0:00	NSS	7795997	52	ZOOLOGY	804355790	UYTTZT6G9DT1	804355790	UYTTZT6G9DT1	US	32.876991	-117.24087	577507	U OF CALIFORNIA SAN DIEGO		Elite	male	98	LA JOLLA	CA	EARTH SCIENCES/RESOURCES	920930621	UNITED STATES	N	9/15/09 0:00	8/31/10 0:00	864	Non-SBIR/STTR	2009	249000	NICHD		#N/A
NIDA	9272026	6/17/16 0:00	PA-11-197	4R00DA038589-03	4	R00	DA	38589	3		SIROCCO, KAREN	6/1/16 0:00	5/31/19 0:00	NSS	9457149	5	PSYCHOLOGY	790934285	NPU8ULVAAS23	790934285	NPU8ULVAAS23	US	38.992333	-76.952986	820102	U OF MARYLAND COLL PARK		Non-Elite	female	97	COLLEGE PARK	MD	SCHOOLS OF ARTS AND SCIENCES	207420001	UNITED STATES	N	6/1/16 0:00	5/31/17 0:00	279	Non-SBIR/STTR	2016	248836	NIDA	163708	#N/A
NIDA	10057492	4/15/20 0:00	PA-16-193	4R00DA045795-03	4	R00	DA	45795	3		POLLOCK, JONATHAN D	5/1/20 0:00	4/30/23 0:00	NSS	11301567	4	ANATOMY/CELL BIOLOGY	105300446	MLQFL4JSSAA9	105300446	MLQFL4JSSAA9	US	37.549807	-77.452775	353201	VIRGINIA COMMONWEALTH U		Non-Elite	male	99	RICHMOND	VA	SCHOOLS OF MEDICINE	232980568	UNITED STATES	N	5/1/20 0:00	4/30/21 0:00	279	Non-SBIR/STTR	2020	249000	NIDA	181739	#N/A
NIMH	9754903	9/4/18 0:00	PA-16-193	4R00MH115082-02	4	R00	MH	115082	2		ROSSI, ANDREW	9/4/18 0:00	7/31/21 0:00	NSS	12186320	5	NEUROSCIENCES	837322494	MNS7B9CVKDN7	837322494	MNS7B9CVKDN7	US	33.753531	-84.384483	676604	GEORGIA STATE U		Non-Elite	male	88	ATLANTA	GA	SCHOOLS OF ARTS AND SCIENCES	303023999	UNITED STATES	N	9/4/18 0:00	7/31/19 0:00	242	Non-SBIR/STTR	2018	249000	NIMH	171643	#N/A
NIMH	10104792	5/6/20 0:00	PA-16-193	4R00MH116735-03	4	R00	MH	116735	3		SENN, THERESA ELAINE	5/1/18 0:00	4/30/23 0:00	NSS	11787219	6	Unavailable	41096314	MW8JHK6ZYEX8	41096314	MW8JHK6ZYEX8	US	39.745098	-104.837605	1199905	U OF COLORADO DENVER		Non-Elite	female	96	Aurora	CO	Domestic Higher Education	800452570	UNITED STATES	N	5/1/20 0:00	4/30/21 0:00	242	Non-SBIR/STTR	2020	249000	NIMH	176029	coastal
NCI	9600270	1/1/18 0:00	PA-15-083	4R00CA197487-03	4	R00	CA	197487	3		FINGERMAN, IAN M	4/1/16 0:00	12/31/20 0:00	NSS	12268422	98	INTERNAL MEDICINE/MEDICINE	49515844	TF2CMKY1HMX9	49515844	TF2CMKY1HMX9	US	38.905206	-77.07547	2869001	GEORGETOWN U		Non-Elite	male	91	WASHINGTON	DC	SCHOOLS OF MEDICINE	200570001	UNITED STATES	N	1/1/18 0:00	12/31/18 0:00	393	Non-SBIR/STTR	2018	249000	NCI	167981	coastal
NINDS	9233224	3/9/16 0:00	PA-11-197	4R00NS087088-03	4	R00	NS	87088	3		GNADT, JAMES W	4/1/16 0:00	3/31/19 0:00	NSS	10318721	5	BIOLOGY	97394084	EMW9FC8J3HN4	97394084	EMW9FC8J3HN4	US	33.781897	-84.404009	676603	GEORGIA INST OF TECHNOLOGY		Non-Elite	male	82	ATLANTA	GA	SCHOOLS OF ARTS AND SCIENCES	303320415	UNITED STATES	N	4/1/16 0:00	3/31/17 0:00	853	Non-SBIR/STTR	2016	248999	NINDS	179507	#N/A
NIMH	8100593	8/10/10 0:00		4R00MH085944-03	4	R00	MH	85944	3		ROSSI, ANDREW	7/14/10 0:00	4/30/13 0:00	NSS	9501051	7	ENGINEERING (ALL TYPES)	49435266	THL6A6JLE1S7	49435266	THL6A6JLE1S7	US	42.349594	-71.099726	10001093	BOSTON U (CHARLES RIVER CAMPUS)		Non-Elite	female	74	BOSTON	MA	BIOMED ENGR/COL ENGR/ENGR STA	22151390	UNITED STATES	N	8/10/10 0:00	4/30/11 0:00	242	Non-SBIR/STTR	2010	249000	NIMH		coastal
NIGMS	9626058	5/7/18 0:00	PA-15-083	4R00GM119126-02	4	R00	GM	119126	2		JANES, DANIEL E	7/1/16 0:00	4/30/21 0:00	NSS	10996072	30	MICROBIOLOGY/IMMUN/VIROLOGY	800771545	YZJ6DKPM4W63	800771545	YZJ6DKPM4W63	US	32.811963	-96.837534	578404	UT SOUTHWESTERN MED CTR		Non-Elite	male	100	DALLAS	TX	SCHOOLS OF MEDICINE	753909105	UNITED STATES	N	5/7/18 0:00	4/30/19 0:00	859	Non-SBIR/STTR	2018	249000	NIGMS	153704	coastal
NICHD	10313087	##########	PA-18-398	4R00HD099276-03	4	R00	HD	99276	3		TAYMANS, SUSAN	##########	##########	NSS	9699461	2	BIOCHEMISTRY	614209054	WNTPS995QBM7	614209054	WNTPS995QBM7	US	41.811419	-72.247553	1506602	U OF CONNECTICUT STORRS		Non-Elite	female	95	STORRS-MANSFIELD	CT	SCHOOLS OF ARTS AND SCIENCES	62691133	UNITED STATES	N	1/11/21 0:00	##########	865	Non-SBIR/STTR	2021	249000	NICHD	154658	#N/A
NIEHS	9999167	9/2/19 0:00	PA-16-193	4R00ES028748-03	4	R00	ES	28748	3		SCHUG, THADDEUS	9/2/19 0:00	8/31/22 0:00	NSS	12252020	6	Unavailable	939017877	H1HYA8Z1NTM5	939017877	H1HYA8Z1NTM5	US	38.040959	-84.505885	2793601	U OF KENTUCKY		Non-Elite	male	99	LEXINGTON	KY	Domestic Higher Education	405260001	UNITED STATES	N	9/2/19 0:00	8/31/20 0:00	113	Non-SBIR/STTR	2019	249000	NIEHS	176255	coastal
NIGMS	10076878	1/31/20 0:00	PA-18-398	4R00GM130896-02	4	R00	GM	130896	2		COYNE, ROBERT STEPHEN	2/1/19 0:00	1/31/23 0:00	NSS	14113613	7	ENGINEERING (ALL TYPES)	1425594	E2NYLCDML6V1	1425594	E2NYLCDML6V1	US	42.359128	-71.093339	4911501	MASSACHUSETTS INST OF TECHNOLOGY		Elite	male	99	CAMBRIDGE	MA	BIOMED ENGR/COL ENGR/ENGR STA	21421029	UNITED STATES	N	2/1/20 0:00	1/31/21 0:00	859	Non-SBIR/STTR	2020	249000	NIGMS	175419	#N/A
NCI	9104260	8/5/15 0:00	PA-11-197	4R00CA184043-03	4	R00	CA	184043	3		OKANO, PAUL	8/1/15 0:00	7/31/18 0:00	NSS	10320457	49	Unavailable	78731668	NNJ6BMBTFGN5	78731668	NNJ6BMBTFGN5	US	32.8863	-117.243929	7210001	SALK INST FOR BIOLOGICAL STUDIES		Non-Elite	female	98	La Jolla	CA	Research Institutes	920371002	UNITED STATES	N	8/1/15 0:00	7/31/16 0:00	393	Non-SBIR/STTR	2015	249000	NCI	168873	#N/A
NHLBI	9967226	11/29/19 0:00	PA-16-193	4R00HL141678-03	4	R00	HL	141678	3		REINECK, LORA A	4/15/18 0:00	12/31/22 0:00	NSS	11290847	3	BIOSTATISTICS & OTHER MATH SCI	42250712	GM1XX56LEP58	42250712	GM1XX56LEP58	US	39.953462	-75.193983	6463801	U OF PENNSYLVANIA		Elite	male	99	PHILADELPHIA	PA	SCHOOLS OF MEDICINE	191046205	UNITED STATES	N	1/1/20 0:00	12/31/20 0:00	838	Non-SBIR/STTR	2020	249000	NHLBI	153704	#N/A
NHLBI	8985384	1/20/15 0:00	PA-11-197	4R00HL112952-03	4	R00	HL	112952	3		BUXTON, DENIS B	2/1/15 0:00	1/31/18 0:00	NSS	10919030	3	PHYSIOLOGY	928824473	X59NJBFL8BJ3	928824473	X59NJBFL8BJ3	US	32.328724	-90.175537	5390304	U OF MISSISSIPPI MED CTR		Non-Elite	male	99	JACKSON	MS	SCHOOLS OF MEDICINE	392164500	UNITED STATES	N	2/1/15 0:00	1/31/16 0:00	837	Non-SBIR/STTR	2015	240720	NHLBI	163185	coastal
NIDCR	10101757	7/8/20 0:00	PA-16-193	4R00DE026810-03	4	R00	DE	26810	3		GRISIUS, MARGARET	7/8/20 0:00	6/30/23 0:00	NSS	12295234	5	ANESTHESIOLOGY	66469933	S352L5PJLMP8	66469933	S352L5PJLMP8	US	33.791247	-84.3249	2384501	EMORY U		Non-Elite	male	99	ATLANTA	GA	SCHOOLS OF MEDICINE	303221007	UNITED STATES	N	7/8/20 0:00	6/30/21 0:00	121	Non-SBIR/STTR	2020	246352	NIDCR	157918	coastal
NIA	9320396	8/25/16 0:00	PA-11-197	4R00AG047128-02	4	R00	AG	47128	2		KOHANSKI, RONALD A	9/1/16 0:00	4/30/19 0:00	Biological Aging Study Section[NIA-B]	11785160	7	BIOLOGY	63690705	YND4PLMC9AN7	63690705	YND4PLMC9AN7	US	33.50591	-86.799772	1288803	U OF ALABAMA AT BIRMINGHAM		Non-Elite	female	98	BIRMINGHAM	AL	SCHOOLS OF ARTS AND SCIENCES	352940001	UNITED STATES	N	9/1/16 0:00	4/30/17 0:00	866	Non-SBIR/STTR	2016	248688	NIA	224808	coastal
NIEHS	10217454	##########	PA-18-398	4R00ES029552-03	4	R00	ES	29552	3		HOLLANDER, JONATHAN	##########	##########	NSS	14310959	1	BIOCHEMISTRY	183710748	NHV3GTWSALA7	183710748	NHV3GTWSALA7	US	32.786754	-79.947265	7575301	MED U OF SOUTH CAROLINA		Non-Elite	female	98	CHARLESTON	SC	SCHOOLS OF MEDICINE	294074636	UNITED STATES	N	9/9/21 0:00	##########	113	Non-SBIR/STTR	2021	183105	NIEHS	107943	coastal
NCI	9749325	9/14/18 0:00	PA-16-193	4R00CA207855-03	4	R00	CA	207855	3		BOUDREAU, NANCY	9/1/18 0:00	8/31/21 0:00	NSS	10299481	3	PHARMACOLOGY	2604817	XF3XM9642N96	2604817	XF3XM9642N96	US	39.954073	-75.186541	2205901	DREXEL U		Non-Elite	male	99	PHILADELPHIA	PA	SCHOOLS OF MEDICINE	191043735	UNITED STATES	N	9/1/18 0:00	8/31/19 0:00	395	Non-SBIR/STTR	2018	249000	NCI	159106	#N/A
NIAAA	8481897	7/13/12 0:00	PA-11-197	4R00AA018387-03	4	R00	AA	18387	3		BECHTHOLT, ANITA J	3/1/10 0:00	6/30/15 0:00	NSS	9631503	98	Unavailable	143983562	M3KHEEYRM1S6	143983562	M3KHEEYRM1S6	US	38.927274	-77.014396	1518602	CHILDRENS RES INST		Non-Elite	female	95	WASHINGTON	DC	Research Institutes	200102916	UNITED STATES	N	7/15/12 0:00	6/30/13 0:00	273	Non-SBIR/STTR	2012	228277	NIAAA	134603	coastal
NCRR	7659211	9/12/08 0:00	PA-06-133	4R00RR024107-02	4	R00	RR	24107	2		SHEELEY, DOUGLAS	8/1/08 0:00	7/31/11 0:00	NSS	2219325	1	GENETICS	68552207	L6NFUM28LQM5	68552207	L6NFUM28LQM5	US	38.664368	-90.323797	9083901	WASHINGTON U		Non-Elite	male	99	SAINT LOUIS	MO	SCHOOLS OF MEDICINE	631304862	UNITED STATES	N	8/1/08 0:00	7/31/09 0:00	389	Non-SBIR/STTR	2008	249000	NCRR		#N/A
NHLBI	8060040	7/27/10 0:00		4R00HL094536-03	4	R00	HL	94536	3		GAO, YUNLING	8/2/10 0:00	6/30/13 0:00	NSS	7823835	7	ANESTHESIOLOGY	605799469	HD1WMN6945W6	605799469	HD1WMN6945W6	US	47.660307	-122.315168	9087701	U OF WASHINGTON		Elite	male	99	SEATTLE	WA	SCHOOLS OF MEDICINE	981959472	UNITED STATES	N	8/2/10 0:00	6/30/11 0:00	837	Non-SBIR/STTR	2010	248942	NHLBI		coastal
NICHD	8501771	9/15/12 0:00		4R00HD068506-03	4	R00	HD	68506	3		BURES, REGINA M	9/1/11 0:00	8/31/15 0:00	NSS	10418550	4	NONE	45896339	MJ3JH8CRJBZ7	45896339	MJ3JH8CRJBZ7	US	42.336956	-71.170504	872101	BOSTON COLL		Non-Elite	female	100	CHESTNUT HILL	MA	SCHOOLS OF SOCIAL WELFARE/WORK	24673800	UNITED STATES	N	9/1/12 0:00	8/31/13 0:00	865	Non-SBIR/STTR	2012	245755	NICHD	157032	coastal
NIDA	8265022	8/14/11 0:00	PA-10-063	4R00DA027718-03	4	R00	DA	27718	3		VOLMAN, SUSAN	8/15/11 0:00	7/31/14 0:00	NSS	6725478	25	OTHER BASIC SCIENCES	41294109	F27KDXZMF9Y8	41294109	F27KDXZMF9Y8	US	43.131774	-77.63546	7047101	U OF ROCHESTER		Non-Elite	male	99	ROCHESTER	NY	SCHOOLS OF ARTS AND SCIENCES	146270140	UNITED STATES	N	8/15/11 0:00	7/31/12 0:00	279	Non-SBIR/STTR	2011	249017	NIDA		#N/A
NIMH	8298309	8/15/11 0:00		4R00MH085060-03	4	R00	MH	85060	3		CHAVEZ, MARK	8/15/11 0:00	7/31/14 0:00	NSS	7799721	8	PSYCHOLOGY	808008122	CGCDJ24JJLZ1	808008122	CGCDJ24JJLZ1	US	42.313703	-71.062976	850902	U OF MASSACHUSETTS BOSTON		Non-Elite	female	98	BOSTON	MA	SCHOOLS OF ARTS AND SCIENCES	21253300	UNITED STATES	N	8/15/11 0:00	7/31/12 0:00	242	Non-SBIR/STTR	2011	249000	NIMH		coastal
NIDDK	8774357	12/23/13 0:00	PA-11-197	4R00DK094980-03	4	R00	DK	94980	3		HAFT, CAROL R	1/1/14 0:00	12/31/16 0:00	NSS	10896029	7	ANATOMY/CELL BIOLOGY	5436803	KG76WYENL5K1	5436803	KG76WYENL5K1	US	42.050479	-87.680046	6144650	NORTHWESTERN U		Elite	female	63	CHICAGO	IL	SCHOOLS OF MEDICINE	606114579	UNITED STATES	N	1/1/14 0:00	12/31/14 0:00	847	Non-SBIR/STTR	2014	249001	NIDDK	165558	#N/A
NIDCR	9186573	12/3/15 0:00	PA-11-197	4R00DE024617-03	4	R00	DE	24617	3		SCHOLNICK, STEVEN	7/16/14 0:00	11/30/18 0:00	NSS	11350418	1	ANATOMY/CELL BIOLOGY	53785812	XNY5ULPU8EN6	53785812	XNY5ULPU8EN6	US	29.935429	-90.12279	8424601	TULANE U OF LOUISIANA		Non-Elite	male	100	NEW ORLEANS	LA	SCHOOLS OF ARTS AND SCIENCES	701185665	UNITED STATES	N	12/3/15 0:00	11/30/16 0:00	121	Non-SBIR/STTR	2016	249000	NIDCR	207533	coastal
NCI	10085027	2/4/20 0:00	PA-16-193	4R00CA215316-03	4	R00	CA	215316	3		XU, WANPING	2/1/20 0:00	1/31/23 0:00	NSS	12019594	3	PATHOLOGY	53284659	R8JEVL4ULGB7	53284659	R8JEVL4ULGB7	US	39.948207	-75.157825	4050801	THOMAS JEFFERSON U		Non-Elite	male	88	PHILADELPHIA	PA	SCHOOLS OF MEDICINE	191074418	UNITED STATES	N	2/1/20 0:00	1/31/21 0:00	396	Non-SBIR/STTR	2020	249000	NCI	159616	coastal
NCI	7738741	1/15/09 0:00	PA-06-133	4R00CA126186-03	4	R00	CA	126186	3		HOWCROFT, THOMAS K	12/1/06 0:00	11/30/11 0:00	ZCA1-RTRB-A(O1)	9478607	13	BIOCHEMISTRY	124726725	GS3YEVSS12N6	124726725	GS3YEVSS12N6	US	37.870017	-122.268624	577502	U OF CALIFORNIA BERKELEY		Elite	female	58	BERKELEY	CA	SCHOOLS OF ARTS AND SCIENCES	947101749	UNITED STATES	N	12/1/08 0:00	11/30/09 0:00	398	Non-SBIR/STTR	2009	223256	NCI		#N/A
NIDDK	8310339	9/5/11 0:00		4R00DK085142-03	4	R00	DK	85142	3		MARGOLIS, RONALD N	9/1/11 0:00	8/31/14 0:00	NSS	9585745	7	PEDIATRICS	1910777	FTMTDMBR29C7	1910777	FTMTDMBR29C7	US	39.325256	-76.605131	4134401	JOHNS HOPKINS U		Elite	female	79	BALTIMORE	MD	SCHOOLS OF MEDICINE	212182680	UNITED STATES	N	9/1/11 0:00	8/31/12 0:00	847	Non-SBIR/STTR	2011	249000	NIDDK		coastal
NHLBI	10410944	##########	PA-18-590	7R00HL133590-04	7	R00	HL	133590	4		WELNIAK, LISBETH A	2/1/21 0:00	##########	NSS	11861342	1	PHARMACOLOGY	606192896	T3B4DWYVH7L5	606192896	T3B4DWYVH7L5	US	36.138527	-96.005036	688801	OSU CTR FOR HEALTH SCI		Non-Elite	female	89	TULSA	OK	SCHOOLS OF MEDICINE	741071898	UNITED STATES	N	7/15/21 0:00	##########	839	Non-SBIR/STTR	2021	248998	NHLBI	180740	#N/A
NIAID	10662620	9/7/22	PAR-17-329	4R00AI143927-03	4	R00	AI	143927	3		GONDRE-LEWIS, TIMOTHY A	9/7/22	8/31/24	NSS	14200711	4	INTERNAL MEDICINE/MEDICINE	44387793	TP7EK8DZV6N5	44387793	TP7EK8DZV6N5	US	36.007766	-78.926475	2221101	DUKE U		Elite	male	100	DURHAM	NC	SCHOOLS OF MEDICINE	277054673	UNITED STATES	N	9/7/22	8/31/23	855	Non-SBIR/STTR	2022	248882	NIAID	159067	#N/A
NICHD	8424585	3/6/12 0:00	PA-11-197	4R00HD059945-03	4	R00	HD	59945	3		MOSS, STUART B	3/6/12 0:00	2/28/15 0:00	NSS	7093216	9	GENETICS	51113330	FXKMA43NTV21	51113330	FXKMA43NTV21	US	29.70926	-95.400851	481201	BAYLOR COLL OF MED		Non-Elite	male	99	HOUSTON	TX	SCHOOLS OF MEDICINE	770303411	UNITED STATES	N	3/6/12 0:00	2/28/13 0:00	865	Non-SBIR/STTR	2012	248391	NICHD	178645	coastal
NIDA	9233225	6/24/16 0:00	PA-14-042	4R00DA038706-03	4	R00	DA	38706	3		BERTON, OLIVIER	5/1/16 0:00	4/30/19 0:00	NSS	9531230	4	OTHER BASIC SCIENCES	46929621	HKJCKTFJNBM7	46929621	HKJCKTFJNBM7	US	43.038728	-87.923307	4833601	MARQUETTE U	607	Non-Elite	male	100	MILWAUKEE	WI	SCH ALLIED HEALTH PROFESSIONS	532011881	UNITED STATES	N	5/1/16 0:00	4/30/17 0:00	279	Non-SBIR/STTR	2016	249000	NIDA	178011	#N/A
NIGMS	10663450	7/28/22	PA-19-130	4R00GM134193-03	4	R00	GM	134193	3		SESMA, MICHAEL A	4/1/20	7/31/25	ZGM1-SRC(99)	14602982	6	BIOCHEMISTRY	41096314	MW8JHK6ZYEX8	41096314	MW8JHK6ZYEX8	US	39.745098	-104.837605	1199905	U OF COLORADO DENVER		Non-Elite	female	98	Aurora	CO	SCHOOLS OF MEDICINE	800452570	UNITED STATES	N	8/1/22	7/31/23	859	Non-SBIR/STTR	2022	249000	NIGMS	177617	coastal
NIDCR	9742651	7/26/18 0:00	PA-15-083	4R00DE025917-03	4	R00	DE	25917	3		RIDDLE, MELISSA	9/1/18 0:00	8/31/21 0:00	NSS	8698160	7	DENTISTRY	604483045	FBYMGMHW4X95	604483045	FBYMGMHW4X95	US	42.33639	-71.07097	894901	BOSTON U MED CAMPUS		Non-Elite	female	98	BOSTON	MA	SCHOOLS OF DENTISTRY/ORAL HYGN	21182340	UNITED STATES	N	9/1/18 0:00	8/31/19 0:00	121	Non-SBIR/STTR	2018	248886	NIDCR	150840	coastal
NIDA	10294298	##########	PA-16-193	4R00DA046564-03	4	R00	DA	46564	3		LAO, GUIFANG	3/1/19 0:00	##########	ZDA1-SXM-M(04)S	13110137	9	PSYCHOLOGY	800771594	ZUFBNVZ587D4	800771594	ZUFBNVZ587D4	US	29.703025	-95.403303	578417	U OF TEXAS HLTH SCI CTR HOUSTON		Non-Elite	female	98	HOUSTON	TX	SCHOOLS OF PUBLIC HEALTH	770305400	UNITED STATES	N	12/1/20 0:00	##########	279	Other Research-Related	2021	248999	NIDA	159615	#N/A
NICHD	9044050	7/1/15 0:00	PA-11-197	4R00HD076679-03	4	R00	HD	76679	3		RUSSO, DENISE	7/1/15 0:00	5/31/18 0:00	NSS	10440440	7	Unavailable	605799469	HD1WMN6945W6	605799469	HD1WMN6945W6	US	47.660307	-122.315168	9087701	U OF WASHINGTON		Elite	female	95	SEATTLE	WA	Domestic Higher Education	981959472	UNITED STATES	N	7/1/15 0:00	5/31/16 0:00	865	Non-SBIR/STTR	2015	249000	NICHD	177688	coastal
NIGMS	9109225	7/28/15 0:00	PA-11-197	4R00GM107355-03	4	R00	GM	107355	3		GINDHART, JOSEPH G	9/1/13 0:00	6/30/18 0:00	NSS	10261658	24	ANATOMY/CELL BIOLOGY	58889106	HYN3WD58HNN7	58889106	HYN3WD58HNN7	US	43.042595	-76.14055	5992619	UPSTATE MED U		Non-Elite	female	98	SYRACUSE	NY	SCHOOLS OF MEDICINE	132102306	UNITED STATES	N	8/1/15 0:00	6/30/16 0:00	859	Non-SBIR/STTR	2015	248995	NIGMS	168385	coastal
NHLBI	9513799	7/26/17 0:00	PA-14-042	4R00HL130035-03	4	R00	HL	130035	3		SHI, YANG	8/11/15 0:00	7/31/20 0:00	NSS	11080786	98	Unavailable	143983562	M3KHEEYRM1S6	143983562	M3KHEEYRM1S6	US	38.927274	-77.014396	1518602	CHILDRENS RES INST		Non-Elite	male	99	WASHINGTON	DC	Research Institutes	200102916	UNITED STATES	N	8/1/17 0:00	7/31/18 0:00	837	Non-SBIR/STTR	2017	249000	NHLBI	142286	#N/A
NHLBI	8307122	9/13/11 0:00		4R00HL096897-03	4	R00	HL	96897	3		ROTHGEB, ANN E	9/15/11 0:00	7/31/14 0:00	NSS	8395827	7	ANESTHESIOLOGY	1910777	FTMTDMBR29C7	1910777	FTMTDMBR29C7	US	39.325256	-76.605131	4134401	JOHNS HOPKINS U		Elite	male	81	BALTIMORE	MD	SCHOOLS OF MEDICINE	212182680	UNITED STATES	N	9/15/11 0:00	7/31/12 0:00	837	Non-SBIR/STTR	2011	249000	NHLBI		coastal
NHLBI	8052236	8/24/10 0:00		4R00HL092226-03	4	R00	HL	92226	3		COLOMBINI-HATCH, SANDRA	9/1/10 0:00	6/30/13 0:00	NSS	9110825	5	PHYSIOLOGY	66469933	S352L5PJLMP8	66469933	S352L5PJLMP8	US	33.791247	-84.3249	2384501	EMORY U		Non-Elite	female	64	ATLANTA	GA	SCHOOLS OF MEDICINE	303221007	UNITED STATES	N	9/1/10 0:00	6/30/11 0:00	837	Non-SBIR/STTR	2010	249000	NHLBI		#N/A
NCI	8525758	9/12/12 0:00		4R00CA143229-03	4	R00	CA	143229	3		WOODHOUSE, ELIZABETH	9/12/12 0:00	8/31/15 0:00	NSS	9171661	20	MISCELLANEOUS	152652822	NHH3T1Z96H29	152652822	NHH3T1Z96H29	US	42.691708	-73.825588	5992604	STATE U OF NEW YORK AT ALBANY	553	Non-Elite	female	98	ALBANY	NY	SCHOOLS OF ARTS AND SCIENCES	122220001	UNITED STATES	N	9/12/12 0:00	8/31/13 0:00	396	Non-SBIR/STTR	2012	249272	NCI	163815	#N/A
NHLBI	8076427	6/30/10 0:00	PA-07-297	4R00HL093064-02	4	R00	HL	93064	2		ROTHGEB, ANN E	7/1/10 0:00	6/30/13 0:00	NSS	7891882	52	INTERNAL MEDICINE/MEDICINE	804355790	UYTTZT6G9DT1	804355790	UYTTZT6G9DT1	US	32.876991	-117.24087	577507	U OF CALIFORNIA SAN DIEGO		Elite	female	98	LA JOLLA	CA	SCHOOLS OF MEDICINE	920930621	UNITED STATES	N	7/1/10 0:00	6/30/11 0:00	837	Non-SBIR/STTR	2010	249000	NHLBI		coastal
NIDA	9411188	5/12/17 0:00	PA-15-083	4R00DA040047-02	4	R00	DA	40047	2		SORENSEN, ROGER	6/1/17 0:00	5/31/20 0:00	NSS	11018139	3	OTHER BASIC SCIENCES	36156615	HH1NQ1B5MPV3	36156615	HH1NQ1B5MPV3	US	38.416466	-82.44721	4842001	MARSHALL U		Non-Elite	male	100	Huntington	WV	SCHOOLS OF MEDICINE	257550002	UNITED STATES	N	6/1/17 0:00	5/31/18 0:00	279	Non-SBIR/STTR	2017	216671	NIDA	149325	coastal
NINDS	9538322	8/28/17 0:00	PA-14-042	4R00NS089800-03	4	R00	NS	89800	3		TALLEY, EDMUND M	9/1/17 0:00	8/31/20 0:00	NSS	9177946	1	BIOLOGY	68552207	L6NFUM28LQM5	68552207	L6NFUM28LQM5	US	38.664368	-90.323797	9083901	WASHINGTON U		Non-Elite	male	98	SAINT LOUIS	MO	SCHOOLS OF ARTS AND SCIENCES	631304862	UNITED STATES	N	9/1/17 0:00	8/31/18 0:00	853	Non-SBIR/STTR	2017	249000	NINDS	238998	#N/A
NIMH	7884964	9/22/09 0:00	PA-06-133	4R00MH081058-03	4	R00	MH	81058	3		PANCHISION, DAVID M	7/30/07 0:00	6/30/12 0:00	NSS	8737737	13	PATHOLOGY	621889815	QHF5ZZ114M72	621889815	QHF5ZZ114M72	US	40.8415	-73.9414	1833205	COLUMBIA U HEALTH SCI		Elite	male	98	NEW YORK	NY	SCHOOLS OF MEDICINE	100323725	UNITED STATES	N	7/1/09 0:00	6/30/10 0:00	242	Non-SBIR/STTR	2009	249000	NIMH		coastal
NEI	9771065	9/19/18 0:00	PA-16-077	4R00EY027467-03	4	R00	EY	27467	3		GREENWELL, THOMAS	9/30/18 0:00	5/31/21 0:00	NSS	9173850	1	PSYCHOLOGY	76152578	XLYHHWMEWKJ4	76152578	XLYHHWMEWKJ4	US	42.623761	-87.82403	1183701	CARTHAGE COLL		Non-Elite	male	99	KENOSHA	WI	SCHOOLS OF ARTS AND SCIENCES	531401929	UNITED STATES	N	9/30/18 0:00	5/31/19 0:00	867	Non-SBIR/STTR	2018	248999	NEI	185972	coastal
NIDCD	9306240	7/12/16 0:00	PA-11-197	4R00DC013792-03	4	R00	DC	13792	3		RIVERA-RENTAS, ALBERTO L	7/1/16 0:00	6/30/19 0:00	NSS	10583409	25	OTOLARYNGOLOGY	41294109	F27KDXZMF9Y8	41294109	F27KDXZMF9Y8	US	43.131774	-77.63546	7047101	U OF ROCHESTER		Non-Elite	male	99	ROCHESTER	NY	SCHOOL OF MEDICINE & DENTISTRY	146270140	UNITED STATES	N	7/1/16 0:00	6/30/17 0:00	173	Non-SBIR/STTR	2016	248960	NIDCD	162189	coastal
NIEHS	8193401	12/27/10 0:00	PA-07-297	4R00ES017051-03	4	R00	ES	17051	3		TYSON, FREDERICK L	1/1/11 0:00	12/31/13 0:00	NSS	9369814	13	PUBLIC HEALTH & PREV MEDICINE	621889815	QHF5ZZ114M72	621889815	QHF5ZZ114M72	US	40.8415	-73.9414	1833205	COLUMBIA U HEALTH SCI		Elite	female	98	NEW YORK	NY	SCHOOLS OF PUBLIC HEALTH	100323725	UNITED STATES	N	1/1/11 0:00	12/31/11 0:00	113	Non-SBIR/STTR	2011	248749	NIEHS		coastal
NIDA	7758094	3/19/09 0:00	PA-07-297	4R00DA023548-03	4	R00	DA	23548	3		BISWAS, JAMIE	4/1/09 0:00	1/31/12 0:00	NSS	8787740	5	PSYCHIATRY	555917996	KABJZBBJ4B54	555917996	KABJZBBJ4B54	US	44.975143	-93.227003	1450402	U OF MINNESOTA		Non-Elite	male	99	MINNEAPOLIS	MN	SCHOOLS OF MEDICINE	554552070	UNITED STATES	N	4/1/09 0:00	1/31/10 0:00	279	Non-SBIR/STTR	2009	249000	NIDA		#N/A
[truncated: 1,848 more rows]
