# Supplementary material for: Analysis of NIH K99/R00 Awards and the Career Progression of Awardees
Source: bioRxiv preprint, doi:10.1101/2023.01.26.525751, version 16 (2023-12-29)
Supplement: Supplemental File 3 [file 525751_file14.csv]

Administering IC	Application ID	Award Notice Date	FOA	Project Number	Type	Activity	IC	Serial Number	Support Year	Suffix	Program Official Information	Project Start Date	Project End Date	Study Section	Contact PI Person ID	Congressional District	Department	Primary DUNS	Primary UEI	DUNS Number	UEI	FIPS	Latitude	Longitude	Organization ID (IPF)	Organization_Name	Organization City	Organization State	Organization Type	Organization Zip	Organization Country	ARRA Indicator	Budget Start Date	Budget End Date	CFDA Code	Funding Mechanism	Fiscal Year	Total Cost	Funding IC(s)	Total Cost IC	K99_inst_pub_priv	same_dept	same_insti	Administering IC	Application ID	Award Notice Date	FOA	Project Number	Activity
NIDCR	9453397	9/14/17 0:00	PA-16-193	1K99DE026807-01A1	1	K99	DE	26807	1	A	FRIEDEN LESLIE A	9/15/17 0:00	7/31/18 0:00	ZDE1-NB(03)	10330774	3	NEUROSCIENCES	42250712	GM1XX56LEP58	42250712	GM1XX56LEP58	US	39.953462	-75.193983	6463801	U_OF_PENNSYLVANIA	PHILADELPHIA	PA	SCHOOLS OF MEDICINE	191046205	UNITED STATES	N	42993	43312	121	Other Research-Related	7/9/05 0:00	11/26/80 0:00	NIDCR	102600	Private	FALSE	TRUE	NIDCR	9700832	43304	PA-16-193	4R00DE026807-02	R00
NIAID	9282664	5/17/17 0:00	PA-15-083	5K99AI125786-02	5	K99	AI	125786	2		RANALLO RYAN	6/1/16 0:00	5/31/18 0:00	Microbiology and Infectious Diseases B Research Study Section[MID-B]	9616595	12	UnavaiLABle	64931884	KUKXRCZ6NZC2	64931884	KUKXRCZ6NZC2	US	40.764045	-73.956024	5079202	SLOAN-KETTERING_INST_CAN_RES	NEW YORK	NY	Research Institutes	100656007	UNITED STATES	N	42887	43251	855	Other Research-Related	7/9/05 0:00	4/6/90 0:00	NIAID	106018	Private	FALSE	FALSE	NIAID	9670918	43251	PA-15-083	4R00AI125786-03	R00
NCI	8425810	12/28/12 0:00	PA-11-197	1K99CA172697-01	1	K99	CA	172697	1		SCHMIDT MICHAEL K	1/1/13 0:00	12/31/13 0:00	Transition to Independence Study Section (I)[NCI-I]	11264317	12	UnavaiLABle	64931884	KUKXRCZ6NZC2	64931884	KUKXRCZ6NZC2	US	40.764045	-73.956024	5079202	SLOAN-KETTERING_INST_CAN_RES	NEW YORK	NY	Research Institutes	100656007	UNITED STATES	N	41275	41639	398	Other Research-Related	7/5/05 0:00	1/19/34 0:00	NCI	158535	Private	FALSE	FALSE	NCI	8786918	41782	PA-11-197	4R00CA172697-02	R00
NINR	7409636	9/26/08 0:00	PA-06-133	5K99NR010495-02	5	K99	NR	10495	2		BOYINGTON JOSEPHINE	9/1/07 0:00	7/31/09 0:00	Behavior and Social Science of Aging Study Section[NIA-S]	8648040	13	INTERNAL MEDICINE/MEDICINE	78861598	C8H9CNG1VBD9	78861598	C8H9CNG1VBD9	US	40.790284	-73.946781	3839801	ICAHN_SCH_OF_MED_AT_MOUNT_SINAI	NEW YORK	NY	SCHOOLS OF MEDICINE	100296574	UNITED STATES	N	39717	40025	361	Other Research-Related	6/30/05 0:00	7/2/43 0:00	NINR	88938	Private	TRUE	TRUE	NINR	7813566	40031	PA-09-036	4R00NR010495-03	R00
NHLBI	8165975	7/28/11 0:00	PA-10-063	1K99HL109256-01	1	K99	HL	109256	1		ROLTSCH MARK	8/1/11 0:00	8/31/12 0:00	ZHL1-CSR-Z(M1)	10669488	18	INTERNAL MEDICINE/MEDICINE	9214214	HJD6G4D6TJY5	9214214	HJD6G4D6TJY5	US	37.426852	-122.17047	8046501	STANFORD_U	STANFORD	CA	SCHOOLS OF MEDICINE	943052004	UNITED STATES	N	40756	41152	837	Other Research-Related	7/3/05 0:00	7/4/38 0:00	NHLBI	123638	Private	TRUE	FALSE	NHLBI	8529685	41142	PA-11-197	4R00HL109256-02	R00
NIAID	7224589	11/30/06 0:00	PA-06-133	1K99AI072973-01	1	K99	AI	72973	1		EMBRY ALAN C	12/1/06 0:00	11/30/07 0:00	Acquired Immunodeficiency Syndrome Research Study Section[AIDS]	8592666	7	UnavaiLABle	73130411	FLJ7DQKLL226	73130411	FLJ7DQKLL226	US	42.363198	-71.068772	4907701	MASSACHUSETTS_GENERAL_HOSP	BOSTON	MA	Independent Hospitals	21142621	UNITED STATES	N	39052	39416	855	Other Research-Related	6/29/05 0:00	5/29/46 0:00	NIAID	90000	Private	TRUE	TRUE	NIAID	7558352	39573		4R00AI072973-02	R00
NIMH	9234601	2/17/17 0:00	PA-15-083	5K99MH108719-02	5	K99	MH	108719	2		VAN'T VEER ASHLEE V	3/1/16 0:00	10/31/18 0:00	ZMH1-ERB-M(05)	12550044	13	UnavaiLABle	167204994	TYVNMW8FNQQ3	167204994	TYVNMW8FNQQ3	US	40.843076	-73.944206	1590919	NEW_YORK_STATE_PSY	NEW YORK	NY	Independent Hospitals	100321007	UNITED STATES	N	42795	43404	242	Other Research-Related	7/9/05 0:00	10/1/45 0:00	NIMH	126284	Private	FALSE	FALSE	NIMH	9905429	43692	PA-18-906	3R00MH108719-03S1	R00
NINDS	9104247	6/16/16 0:00	PA-14-042	5K99NS093071-02	5	K99	NS	93071	2		BABCOCK DEBRA J	7/15/15 0:00	4/1/17 0:00	NST-2 Study Section [NST-2]	10702223	12	NONE	2484665	NJ1YPQXQG7U5	2484665	NJ1YPQXQG7U5	US	40.345441	-74.655866	6661401	PRINCETON_U	Princeton	NJ	ORGANIZED RESEARCH UNITS	85406000	UNITED STATES	N	42552	42826	853	Other Research-Related	7/8/05 0:00	11/20/22 0:00	NINDS	44885	Private	FALSE	FALSE	NINDS	9460679	42846	PA-14-042	4R00NS093071-03	R00
NIEHS	8278527	41051	PA-10-063	5K99ES019597-02	5	K99	ES	19597	2		SHREFFLER CAROL A	40703	41337	ZES1-LKB-J(K9)R	9782928	7	PUBLIC HEALTH & PREV MEDICINE	149617367	UNVDZNFA8R29	149617367	UNVDZNFA8R29	US	42.335306	-71.102775	3212904	HARVARD_SCH_OF_PUBLIC_HEALTH	BOSTON	MA	SCHOOLS OF PUBLIC HEALTH	21156028	UNITED STATES	N	41061	41337	113	Other Research-Related	2012	98280	NIEHS	98280	Private	TRUE	FALSE	NIEHS	8573079	41338	PA-11-197	4R00ES019597-03	R00
NCI	8895871	9/8/15 0:00	PA-11-197	5K99CA187664-02	5	K99	CA	187664	2		SCHMIDT MICHAEL K	8/1/14 0:00	9/24/15 0:00	Transition to Independence Study Section (I)[NCI-I]	12001657	12	PATHOLOGY	73133571	GNJ7BBP73WE9	73133571	GNJ7BBP73WE9	US	42.275494	-83.743038	1506502	U_OF_MICHIGAN_AT_ANN_ARBOR	ANN ARBOR	MI	SCHOOLS OF MEDICINE	481091276	UNITED STATES	N	42217	42271	398	Other Research-Related	7/7/05 0:00	5/22/14 0:00	NCI	114829	Public	FALSE	FALSE	NCI	9148273	42273	PA-11-197	4R00CA187664-03	R00
NHGRI	10040882	8/20/20 0:00	PA-19-130	1K99HG011367-01	1	K99	HG	11367	1		PILLAI AJAY	8/20/20 0:00	7/31/21 0:00	Genome Research Study Section[GNOM-G]	15679360	3	BIOSTATISTICS & OTHER MATH SCI	832127323	DLWBSLWAJWR1	832127323	DLWBSLWAJWR1	US	39.999598	-83.033131	6218701	OHIO_STATE_U	COLUMBUS	OH	SCHOOLS OF ARTS AND SCIENCES	432101016	UNITED STATES	N	44063	44408	172	Other Research-Related	7/12/05 0:00	4/1/72 0:00	NHGRI	99439	Public	FALSE	FALSE	NHGRI	10455118	44414	PA-19-130	4R00HG011367-02	R00
NICHD	9411751	12/18/17 0:00	PA-16-077	5K99HD087523-02	5	K99	HD	87523	2		RAITEN DANIEL J	1/10/17 0:00	7/31/18 0:00	Pediatrics Study Section[CHHD-A]	12387223	13	PUBLIC HEALTH & PREV MEDICINE	78861598	C8H9CNG1VBD9	78861598	C8H9CNG1VBD9	US	40.790284	-73.946781	3839801	ICAHN_SCH_OF_MED_AT_MOUNT_SINAI	NEW YORK	NY	SCHOOLS OF MEDICINE	100296574	UNITED STATES	N	43101	43312	865	Other Research-Related	7/10/05 0:00	6/24/33 0:00	NICHD	85278	Private	TRUE	TRUE	NICHD	9749323	43334	PA-16-077	4R00HD087523-03	R00
NIDCD	8523831	6/24/13 0:00	PA-11-197	5K99DC012536-02	5	K99	DC	12536	2		SKLARE DAN	8/8/12 0:00	7/31/14 0:00	Communication Disorders Review Committee[CDRC]	9586291	7	BIOLOGY	160079455	EXZVPWZBLUE8	160079455	EXZVPWZBLUE8	US	42.050479	-87.680046	6144601	NORTHWESTERN_U	Chicago	IL	SCHOOLS OF ARTS AND SCIENCES	606114579	UNITED STATES	N	41487	41851	173	Other Research-Related	7/5/05 0:00	9/6/52 0:00	NIDCD	92292	Private	FALSE	FALSE	NIDCD	8959353	41995	PA-11-197	4R00DC012536-03	R00
NIMH	7760664	12/1/09 0:00	PA-07-297	5K99MH085039-02	5	K99	MH	85039	2		DESMOND NANCY L	1/22/09 0:00	8/21/11 0:00	ZMH1-ERB-H(09)	9346167	8	UnavaiLABle	73130411	FLJ7DQKLL226	73130411	FLJ7DQKLL226	US	42.363198	-71.068772	4907701	MASSACHUSETTS_GENERAL_HOSP	BOSTON	MA	Independent Hospitals	21142621	UNITED STATES	N	40179	40776	242	Other Research-Related	7/2/05 0:00	12/22/44 0:00	NIMH	89477	Private	TRUE	FALSE	NIMH	8309585	40777	PA-11-197	4R00MH085039-03	R00
NINR	9772554	7/17/19 0:00	PA-16-193	5K99NR017897-02	5	K99	NR	17897	2		TULLY LOIS	8/29/18 0:00	7/31/20 0:00	Nursing Science Review Committee[NRRC(71)]	12672129	5	NONE	66469933	S352L5PJLMP8	66469933	S352L5PJLMP8	US	33.791247	-84.3249	2384501	EMORY_U	ATLANTA	GA	SCHOOLS OF NURSING	303221007	UNITED STATES	N	43678	44043	361	Other Research-Related	7/11/05 0:00	3/13/47 0:00	NINR	90288	Private	TRUE	TRUE	NINR	10241684	44077	PA-16-193	4R00NR017897-03	R00
AHRQ	8519011	2/22/13 0:00	RFA-HS-12-007	1K99HS022192-01	1	K99	HS	22192	1		WILLIS TAMARA	3/1/13 0:00	2/28/14 0:00	ZHS1-HSR-C(01)	11481033	18	BIOSTATISTICS & OTHER MATH SCI	9214214	HJD6G4D6TJY5	9214214	HJD6G4D6TJY5	US	37.426852	-122.17047	8046501	STANFORD_U	STANFORD	CA	SCHOOLS OF ARTS AND SCIENCES	943052004	UNITED STATES	N	41334	41698	226	Other Research-Related	7/5/05 0:00	2/14/89 0:00	AHRQ	105602	Private	FALSE	TRUE	AHRQ	8851060	41796	RFA-HS-12-007	4R00HS022192-02	R00
NINDS	8259140	41017	PA-10-063	5K99NS070821-02	5	K99	NS	70821	2		FUREMAN BRANDY E	40664	41213	NST-2 Study Section [NST-2]	8855758	18	INTERNAL MEDICINE/MEDICINE	9214214	HJD6G4D6TJY5	9214214	HJD6G4D6TJY5	US	37.426852	-122.17047	8046501	STANFORD_U	STANFORD	CA	SCHOOLS OF MEDICINE	943052004	UNITED STATES	N	41030	41213	853	Other Research-Related	2012	87264	NINDS	87264	Private	FALSE	FALSE	NINDS	8598319	41373	PA-10-063	4R00NS070821-03	R00
NIDDK	9894794	3/17/20 0:00	PA-18-398	5K99DK118110-02	5	K99	DK	118110	2		SASLOWSKY DAVID E	4/1/19 0:00	4/30/21 0:00	Digestive Diseases and Nutrition C Study Section[DDK-C]	12544334	1	PATHOLOGY	68552207	L6NFUM28LQM5	68552207	L6NFUM28LQM5	US	38.664368	-90.323797	9083901	WASHINGTON_U	SAINT LOUIS	MO	SCHOOLS OF MEDICINE	631304862	UNITED STATES	N	43922	44316	847	Other Research-Related	7/12/05 0:00	5/29/46 0:00	NIDDK	90000	Private	FALSE	FALSE	NIDDK	10402497	##########	PA-18-398	4R00DK118110-03	R00
NIAMS	8894412	7/23/15 0:00	PA-11-197	5K99AR065480-02	5	K99	AR	65480	2		BAKER CARL	8/1/14 0:00	12/31/15 0:00	Arthritis and Musculoskeletal and Skin Diseases Special Grants Study Section[AMS]	10414777	18	DERMATOLOGY	9214214	HJD6G4D6TJY5	9214214	HJD6G4D6TJY5	US	37.426852	-122.17047	8046501	STANFORD_U	STANFORD	CA	SCHOOLS OF MEDICINE	943052004	UNITED STATES	N	42217	42369	846	Other Research-Related	7/7/05 0:00	5/29/46 0:00	NIAMS	90000	Private	FALSE	FALSE	NIAMS	9269367	42544	PA-11-197	4R00AR065480-03	R00
NCI	9454426	3/7/18 0:00	PA-16-193	5K99CA215249-02	5	K99	CA	215249	2		SCHMIDT MICHAEL K	4/1/17 0:00	1/25/19 0:00	Transition to Independence Study Section (I)[NCI-I]	14469963	49	UnavaiLABle	781613492	PHZJFZ32NKH4	781613492	PHZJFZ32NKH4	US	32.903062	-117.243592	7375802	SCRIPPS_RES_INST_THE	LA JOLLA	CA	Other Domestic Non-Profits	920371000	UNITED STATES	N	43191	43490	398	Other Research-Related	7/10/05 0:00	3/4/14 0:00	NCI	114750	Private	TRUE	FALSE	NCI	9870166	43536	PA-16-193	4R00CA215249-03	R00
NIBIB	8838114	42093	PA-11-197	5K99EB016689-02	5	K99	EB	16689	2		LIU GUOYING	41744	42489	ZEB1-OSR-E(O1)S	10326474	5	RADIATION-DIAGNOSTIC/ONCOLOGY	965717143	GTNBNWXJ12D5	965717143	DWH7MSXKA2A8; GTNBNWXJ12D5	US	36.143381	-86.803365	8721001	VANDERBILT_U	Nashville	TN	SCHOOLS OF MEDICINE	372032408	UNITED STATES	N	42095	42489	286	Other Research-Related	2015	84805	NIBIB	84805	Private	FALSE	FALSE	NIBIB	9274397	42551	PA-11-197	4R00EB016689-04	R00
NHLBI	8523966	6/13/13 0:00	PA-11-197	5K99HL114732-02	5	K99	HL	114732	2		WELNIAK LISBETH A	8/15/12 0:00	2/28/14 0:00	ZHL1-CSR-P(M3)	10972665	18	INTERNAL MEDICINE/MEDICINE	9214214	HJD6G4D6TJY5	9214214	HJD6G4D6TJY5	US	37.426852	-122.17047	8046501	STANFORD_U	STANFORD	CA	SCHOOLS OF MEDICINE	943052004	UNITED STATES	N	41456	41698	837	Other Research-Related	7/5/05 0:00	8/8/39 0:00	NHLBI	124038	Private	TRUE	FALSE	NHLBI	8776045	41705	PA-11-197	4R00HL114732-03	R00
NIA	7531974	8/25/08 0:00	PA-07-297	1K99AG031182-01A1	1	K99	AG	31182	1	A	FINKELSTEIN DAVID B	9/1/08 0:00	8/31/09 0:00	Biological Aging Study Section[NIA-B]	8906824	3	INTERNAL MEDICINE/MEDICINE	42250712	GM1XX56LEP58	42250712	GM1XX56LEP58	US	39.953462	-75.193983	6463801	U_OF_PENNSYLVANIA	PHILADELPHIA	PA	SCHOOLS OF MEDICINE	191046205	UNITED STATES	N	39692	40056	866	Other Research-Related	6/30/05 0:00	5/29/46 0:00	NIA	90000	Private	TRUE	TRUE	NIA	7915904	40070		4R00AG031182-02	R00
NIBIB	9043878	3/31/16 0:00	PA-14-042	5K99EB018994-02	5	K99	EB	18994	2		ERIM ZEYNEP	4/1/15 0:00	3/31/17 0:00	ZEB1-OSR-A(J1)S	11645994	7	PUBLIC HEALTH & PREV MEDICINE	1910777	FTMTDMBR29C7	1910777	FTMTDMBR29C7	US	39.325256	-76.605131	4134401	JOHNS_HOPKINS_U	BALTIMORE	MD	SCHOOLS OF PUBLIC HEALTH	212182680	UNITED STATES	N	42461	42825	286	Other Research-Related	7/8/05 0:00	9/19/41 0:00	NIBIB	88287	Private	TRUE	TRUE	NIBIB	9405681	42804	PA-14-042	4R00EB018994-03	R00
NCI	9127894	7/13/16 0:00	PA-14-042	5K99CA194192-02	5	K99	CA	194192	2		SCHMIDT MICHAEL K	8/17/15 0:00	7/10/17 0:00	Transition to Independence Study Section (I)[NCI-I]	12270014	7	GENETICS	149617367	UNVDZNFA8R29	149617367	UNVDZNFA8R29	US	42.335306	-71.102775	3212904	HARVARD_SCH_OF_PUBLIC_HEALTH	BOSTON	MA	SCHOOLS OF PUBLIC HEALTH	21156028	UNITED STATES	N	42583	42926	398	Other Research-Related	7/8/05 0:00	4/6/66 0:00	NCI	97252	Private	FALSE	FALSE	NCI	9477858	42927	PA-14-042	4R00CA194192-03	R00
NIGMS	8425506	2/25/13 0:00	PA-11-197	1K99GM104148-01	1	K99	GM	104148	1		HAMLET MICHELLE R	3/1/13 0:00	2/28/14 0:00	ZGM1-BRT-X(KR)	10619738	18	MICROBIOLOGY/IMMUN/VIROLOGY	9214214	HJD6G4D6TJY5	9214214	HJD6G4D6TJY5	US	37.426852	-122.17047	8046501	STANFORD_U	STANFORD	CA	SCHOOLS OF MEDICINE	943052004	UNITED STATES	N	41334	41698	859	Other Research-Related	7/5/05 0:00	5/29/46 0:00	NIGMS	90000	Private	FALSE	TRUE	NIGMS	8840350	41779	PA-11-197	4R00GM104148-02	R00
NIA	9926200	6/15/20 0:00	PA-18-398	5K99AG061259-02	5	K99	AG	61259	2		MACKIEWICZ MIROSLAW	7/1/19 0:00	6/30/21 0:00	Basic Neuroscience of Aging Study Section[NIA-N]	10220037	8	UnavaiLABle	73130411	FLJ7DQKLL226	73130411	FLJ7DQKLL226	US	42.363198	-71.068772	4907701	MASSACHUSETTS_GENERAL_HOSP	BOSTON	MA	Independent Hospitals	21142621	UNITED STATES	N	44013	44377	866	Other Research-Related	7/12/05 0:00	3/26/71 0:00	NIA	135591	Private	TRUE	TRUE	NIA	10437070	##########	PA-18-398	4R00AG061259-03	R00
NCI	9113528	8/16/16 0:00	PA-14-042	5K99CA197762-02	5	K99	CA	197762	2		SCHMIDT MICHAEL K	8/1/15 0:00	11/30/16 0:00	Transition to Independence Study Section (I)[NCI-I]	11639678	7	UnavaiLABle	76580745	DPMGH9MG1X67	76580745	DPMGH9MG1X67	US	42.337593	-71.108279	1464901	DANA-FARBER_CANCER_INST	BOSTON	MA	Independent Hospitals	22155450	UNITED STATES	N	42583	42704	398	Other Research-Related	7/8/05 0:00	12/13/61 0:00	NCI	22628	Private	TRUE	FALSE	NCI	9381072	42709	PA-14-042	4R00CA197762-03	R00
NICHD	10129410	7/21/21	PA-19-130	5K99HD098288-02	5	K99	HD	98288	2		BREMER ANDREW	4/1/20	3/31/22	Pediatrics Study Section[CHHD-A]	11764454	28	UnavaiLABle	52277936	DVL1CMRMWRN9	52277936	DVL1CMRMWRN9	US	34.098065	-118.29069	1520001	CHILDRENS_HOSP_OF_LOS_ANGELES	LOS ANGELES	CA	Independent Hospitals	900276062	UNITED STATES	N	4/1/21	3/31/22	865	Other Research-Related	7/13/05 0:00	4/27/46 0:00	NICHD	89968	Private	TRUE	FALSE	NICHD	10580137	3/11/22	PA-19-130	4R00HD098288-03	R00
NIAMS	8302227	6/25/12 0:00	PA-10-063	5K99AR061469-02	5	K99	AR	61469	2		BAKER CARL	8/1/11 0:00	7/31/13 0:00	Arthritis and Musculoskeletal and Skin Diseases Special Grants Study Section[AMS]	8760330	12	BIOLOGY	71037113	LHGDNJMZ64Y1	71037113	LHGDNJMZ64Y1	US	40.763746	-73.955386	7056601	ROCKEFELLER_U	NEW YORK	NY	GRADUATE SCHOOLS	100656399	UNITED STATES	N	41122	41486	846	Other Research-Related	7/4/05 0:00	5/19/65 0:00	NIAMS	96930	Private	FALSE	FALSE	NIAMS	8714189	41512	PA-10-063	4R00AR061469-03	R00
NHLBI	9721795	7/19/19 0:00	PA-18-398	1K99HL146951-01	1	K99	HL	146951	1		LIDMAN KARIN FREDRIKSSON	8/1/19 0:00	7/31/20 0:00	NHLBI Mentored Transition to Independence Study Section[MTI(JA)]	14124085	5	BIOMEDICAL ENGINEERING	965717143	GTNBNWXJ12D5	965717143	DWH7MSXKA2A8; GTNBNWXJ12D5	US	36.143381	-86.803365	8721001	VANDERBILT_U	Nashville	TN	BIOMED ENGR/COL ENGR/ENGR STA	372032408	UNITED STATES	N	43678	44043	837	Other Research-Related	7/11/05 0:00	12/30/70 0:00	NHLBI	98981	Private	FALSE	FALSE	NHLBI	10199268	44077	PA-18-398	4R00HL146951-02	R00
NIGMS	9021676	2/9/16 0:00	PA-14-042	5K99GM112982-02	5	K99	GM	112982	2		FLICKER PAULA F	3/1/15 0:00	12/31/16 0:00	ZGM1-TWD-Y(KR)	11182371	12	PHARMACOLOGY	94878337	KMH5K9V7S518	94878337	KMH5K9V7S518	US	37.767442	-122.413937	577508	U_OF_CALIFORNIA_SAN_FRANCISCO	SAN FRANCISCO	CA	SCHOOLS OF MEDICINE	941432510	UNITED STATES	N	42430	42735	859	Other Research-Related	7/8/05 0:00	5/29/46 0:00	NIGMS	90000	public	FALSE	FALSE	NIGMS	9506888	42916	PA-14-042	4R00GM112982-03	R00
NIGMS	9565620	8/30/18 0:00	PA-16-193	5K99GM126145-02	5	K99	GM	126145	2		FLICKER PAULA F	9/15/17 0:00	8/31/19 0:00	ZGM1-TWD-B(KR)	12241807	13	BIOCHEMISTRY	124726725	GS3YEVSS12N6	124726725	GS3YEVSS12N6	US	37.870017	-122.268624	577502	U_OF_CALIFORNIA_BERKELEY	BERKELEY	CA	GRADUATE SCHOOLS	947101749	UNITED STATES	N	43344	43708	859	Other Research-Related	7/10/05 0:00	5/29/46 0:00	NIGMS	90000	public	FALSE	FALSE	NIGMS	10105404	43910	PA-16-193	4R00GM126145-03	R00
NIMH	10348034	5/27/21	PA-20-272	3K99MH119319-02S1	3	K99	MH	119319	2	S	DRISCOLL JAMIE	2/9/21	7/31/21		12669228	18	PSYCHIATRY	9214214	HJD6G4D6TJY5	9214214	HJD6G4D6TJY5	US	37.426852	-122.17047	8046501	STANFORD_U	STANFORD	CA	SCHOOLS OF MEDICINE	943052004	UNITED STATES	N	4/28/21	7/31/21	242	Other Research-Related	7/13/05 0:00	4/26/71 0:00	NIMH	26049	Private	FALSE	FALSE	NIMH	10578907	3/23/22	PA-18-398	4R00MH119319-03	R00
NIMH	10397243	7/7/21	PA-20-272	3K99MH120054-02S1	3	K99	MH	120054	2	S	CHURCHILL JAMES D	5/1/21	4/30/22		14382625	8	UnavaiLABle	73130411	FLJ7DQKLL226	73130411	FLJ7DQKLL226	US	42.363198	-71.068772	4907701	MASSACHUSETTS_GENERAL_HOSP	BOSTON	MA	Independent Hospitals	21142621	UNITED STATES	N	5/1/21	4/30/22	242	Other Research-Related	7/13/05 0:00	3/20/73 0:00	NIMH	99792	Private	TRUE	TRUE	NIMH	10660270	8/5/22	PAR-18-814	4R00MH120054-03	R00
NINDS	8463636	5/3/13 0:00	PA-11-197	5K99NS078055-02	5	K99	NS	78055	2		FOUNTAIN JANE W	5/1/12 0:00	4/30/14 0:00	NST-2 Study Section [NST-2]	9801007	12	NEUROSURGERY	94878337	KMH5K9V7S518	94878337	KMH5K9V7S518	US	37.767442	-122.413937	577508	U_OF_CALIFORNIA_SAN_FRANCISCO	SAN FRANCISCO	CA	SCHOOLS OF MEDICINE	941432510	UNITED STATES	N	41395	41759	853	Other Research-Related	7/5/05 0:00	6/24/81 0:00	NINDS	139334	public	TRUE	FALSE	NINDS	8831805	41837	PA-11-197	4R00NS078055-03	R00
NIAID	8566322	5/15/13 0:00	PA-11-197	1K99AI106942-01	1	K99	AI	106942	1		JACOBS GAIL G	6/1/13 0:00	3/14/14 0:00	Allergy Immunology and Transplantation Research Committee[AITC]	10812148	12	GENETICS	71037113	LHGDNJMZ64Y1	71037113	LHGDNJMZ64Y1	US	40.763746	-73.955386	7056601	ROCKEFELLER_U	NEW YORK	NY	GRADUATE SCHOOLS	100656399	UNITED STATES	N	41426	41712	855	Other Research-Related	7/5/05 0:00	10/11/90 0:00	NIAID	106206	Private	FALSE	FALSE	NIAID	8795866	41708	PA-11-197	4R00AI106942-02	R00
NHGRI	9919609	4/13/20 0:00	PA-18-398	5K99HG010493-02	5	K99	HG	10493	2		SOFIA HEIDI J	5/1/19 0:00	1/13/22 0:00	Genome Research Study Section[GNOM-G]	14416846	52	INTERNAL MEDICINE/MEDICINE	804355790	UYTTZT6G9DT1	804355790	UYTTZT6G9DT1	US	32.876991	-117.24087	577507	U_OF_CALIFORNIA_SAN_DIEGO	LA JOLLA	CA	SCHOOLS OF MEDICINE	920930621	UNITED STATES	N	43952	44574	172	Other Research-Related	7/12/05 0:00	6/14/03 0:00	NHGRI	110834	public	FALSE	FALSE	NHGRI	10532442	1/14/22	PA-18-398	4R00HG010493-03	R00
NCI	10126822	4/6/21	PA-19-130	5K99CA248460-02	5	K99	CA	248460	2		SCHMIDT MICHAEL K	4/1/20	8/31/22	Transition to Independence Study Section (I)[NCI-I]	11011862	12	UnavaiLABle	64931884	KUKXRCZ6NZC2	64931884	KUKXRCZ6NZC2	US	40.764045	-73.956024	5079202	SLOAN-KETTERING_INST_CAN_RES	NEW YORK	NY	Research Institutes	100656007	UNITED STATES	N	4/1/21	8/31/22	398	Other Research-Related	7/13/05 0:00	1/21/90 0:00	NCI	142467	Private	FALSE	FALSE	NCI	10669825	9/12/22	PA-19-130	4R00CA248460-03	R00
NIMH	9748610	7/16/19 0:00	PA-16-193	5K99MH117226-02	5	K99	MH	117226	2		VAN'T VEER ASHLEE V	8/1/18 0:00	7/31/20 0:00	ZMH1-ERB-M(06)	15240208	18	NEUROLOGY	9214214	HJD6G4D6TJY5	9214214	HJD6G4D6TJY5	US	37.426852	-122.17047	8046501	STANFORD_U	STANFORD	CA	SCHOOLS OF MEDICINE	943052004	UNITED STATES	N	43678	44043	242	Other Research-Related	7/11/05 0:00	3/20/47 0:00	NIMH	126819	Private	TRUE	FALSE	NIMH	10187747	44071	PA-16-193	4R00MH117226-03	R00
NIDCR	9564088	8/28/18 0:00	PA-16-193	5K99DE026824-02	5	K99	DE	26824	2		FRIEDEN LESLIE A	9/12/17 0:00	2/29/20 0:00	NIDCR Special Grants Review Committee[DSR]	11769077	8	UnavaiLABle	73130411	FLJ7DQKLL226	73130411	FLJ7DQKLL226	US	42.363198	-71.068772	4907701	MASSACHUSETTS_GENERAL_HOSP	BOSTON	MA	Independent Hospitals	21142621	UNITED STATES	N	43344	43890	121	Other Research-Related	7/10/05 0:00	5/20/44 0:00	NIDCR	162309	Private	TRUE	TRUE	NIDCR	10071248	43879	PA-16-193	4R00DE026824-03	R00
NICHD	8968842	11/12/15 0:00	PA-14-042	5K99HD082280-02	5	K99	HD	82280	2		MUKHOPADHYAY MAHUA	12/1/14 0:00	12/31/16 0:00	Developmental Biology Study Section[CHHD-C]	10727623	18	BIOPHYSICS	9214214	HJD6G4D6TJY5	9214214	HJD6G4D6TJY5	US	37.426852	-122.17047	8046501	STANFORD_U	STANFORD	CA	SCHOOLS OF MEDICINE	943052004	UNITED STATES	N	42339	42735	865	Other Research-Related	7/8/05 0:00	7/25/57 0:00	NICHD	130599	Private	FALSE	FALSE	NICHD	9391731	42731	PA-14-042	4R00HD082280-03	R00
NCI	7940938	8/10/10 0:00	PA-07-297	5K99CA140728-02	5	K99	CA	140728	2		SCHMIDT MICHAEL K	9/8/09 0:00	10/31/11 0:00	Institutional Training and Education Study Section (F)[NCI-F]	9049556	18	INTERNAL MEDICINE/MEDICINE	9214214	HJD6G4D6TJY5	9214214	HJD6G4D6TJY5	US	37.426852	-122.17047	8046501	STANFORD_U	STANFORD	CA	SCHOOLS OF MEDICINE	943052004	UNITED STATES	N	40422	40847	398	Other Research-Related	7/2/05 0:00	11/18/74 0:00	NCI	173448	Private	TRUE	FALSE	NCI	8460336	41149		4R00CA140728-03	R00
NCI	10283079	7/8/21	PA-20-188	1K99CA263021-01	1	K99	CA	263021	1		SCHMIDT MICHAEL K	7/8/21	6/30/22	Transition to Independence Study Section (I)[NCI-I]	10983362	4	NEUROSURGERY	44387793	TP7EK8DZV6N5	44387793	TP7EK8DZV6N5	US	36.007766	-78.926475	2221101	DUKE_U	DURHAM	NC	SCHOOLS OF MEDICINE	277054673	UNITED STATES	N	7/8/21	6/30/22	398	Other Research-Related	7/13/05 0:00	7/14/87 0:00	NCI	105021	Private	TRUE	TRUE	NCI	10675117	9/19/22	PA-20-188	4R00CA263021-02	R00
NIDA	7896865	7/26/10 0:00	PA-07-297	5K99DA025182-02	5	K99	DA	25182	2		WU DA-YU	8/1/09 0:00	1/31/11 0:00	Career Development Education and Training Study Section[NIDA-K]	8204931	7	PHARMACOLOGY	605799469	HD1WMN6945W6	605799469	HD1WMN6945W6	US	47.660307	-122.315168	9087701	U_OF_WASHINGTON	SEATTLE	WA	SCHOOLS OF MEDICINE	981959472	UNITED STATES	N	40391	40574	277	Other Research-Related	7/2/05 0:00	5/19/11 0:00	NIDA	150254	Public	FALSE	FALSE	NIDA	8191123	40574	PA-10-063	4R00DA025182-03	R00
NIBIB	9102100	7/1/16 0:00	PA-14-042	5K99EB020075-02	5	K99	EB	20075	2		ERIM ZEYNEP	7/1/15 0:00	6/30/17 0:00	ZEB1-OSR-A(J1)S	11261634	1	BIOLOGY	5421136	ZUE9HKT2CLC9	5421136	ZUE9HKT2CLC9	US	41.789554	-87.601172	1413601	U_OF_CHICAGO	CHICAGO	IL	SCHOOLS OF MEDICINE	606372612	UNITED STATES	N	42552	42916	286	Other Research-Related	7/8/05 0:00	3/17/29 0:00	NIBIB	83718	private	FALSE	FALSE	NIBIB	9536241	42972	PA-14-042	4R00EB020075-03	R00
NIA	9861213	2/26/20 0:00	PA-18-398	5K99AG061238-02	5	K99	AG	61238	2		WAGSTER MOLLY V	2/15/19 0:00	1/31/21 0:00	Basic Neuroscience of Aging Study Section[NIA-N]	14437432	8	UnavaiLABle	73130411	FLJ7DQKLL226	73130411	FLJ7DQKLL226	US	42.363198	-71.068772	4907701	MASSACHUSETTS_GENERAL_HOSP	BOSTON	MA	Independent Hospitals	21142621	UNITED STATES	N	43891	44227	866	Other Research-Related	7/12/05 0:00	4/23/73 0:00	NIA	136350	Private	TRUE	TRUE	NIA	10404323	##########	PA-18-398	4R00AG061238-03	R00
NCI	9582390	7/12/18 0:00	PA-16-193	1K99CA229984-01	1	K99	CA	229984	1		RADAEV SERGEY	7/12/18 0:00	3/31/19 0:00	Transition to Independence Study Section (I)[NCI-I]	14546459	7	UnavaiLABle	76580745	DPMGH9MG1X67	76580745	DPMGH9MG1X67	US	42.337593	-71.108279	1464901	DANA-FARBER_CANCER_INST	BOSTON	MA	Independent Hospitals	22155450	UNITED STATES	N	43293	43555	398	Other Research-Related	7/10/05 0:00	1/31/53 0:00	NCI	128963	Private	TRUE	FALSE	NCI	9892554	43670	PA-16-193	4R00CA229984-02	R00
NHLBI	8729239	7/18/14 0:00	PA-11-197	1K99HL121177-01A1	1	K99	HL	121177	1	A	WANG WAYNE C	8/1/14 0:00	7/31/15 0:00	ZHL1-CSR-P(M1)	10489626	18	SURGERY	9214214	HJD6G4D6TJY5	9214214	HJD6G4D6TJY5	US	37.426852	-122.17047	8046501	STANFORD_U	STANFORD	CA	SCHOOLS OF MEDICINE	943052004	UNITED STATES	N	41852	42216	837	Other Research-Related	7/6/05 0:00	6/21/43 0:00	NHLBI	88927	Private	FALSE	FALSE	NHLBI	9097874	42236	PA-11-197	4R00HL121177-02	R00
NCI	8442679	12/26/12 0:00	PA-11-197	1K99CA166181-01A1	1	K99	CA	166181	1	A	SCHMIDT MICHAEL K	1/1/13 0:00	12/31/13 0:00	Transition to Independence Study Section (I)[NCI-I]	10912061	12	PATHOLOGY	121911077	M5SZJ6VHUHN8	121911077	M5SZJ6VHUHN8	US	40.669895	-73.974354	5998304	NEW_YORK_U_SCH_OF_MED	NEW YORK	NY	SCHOOLS OF MEDICINE	10016	UNITED STATES	N	41275	41639	398	Other Research-Related	7/5/05 0:00	5/29/46 0:00	NCI	90000	Private	FALSE	FALSE	NCI	8786623	41666	PA-11-197	4R00CA166181-02	R00
NINDS	7619168	5/1/09 0:00	PA-07-297	5K99NS062128-02	5	K99	NS	62128	2		KLEITMAN NAOMI	5/1/08 0:00	4/30/10 0:00	ZNS1-SRB-M(52)	9094159	3	NEUROLOGY	43207562	FL6GV84CKN57	43207562	FL6GV84CKN57	US	41.310925	-72.926428	9420201	YALE_U	NEW HAVEN	CT	SCHOOLS OF MEDICINE	65208327	UNITED STATES	N	39934	40298	853	Other Research-Related	7/1/05 0:00	2/28/46 0:00	NINDS	89910	Private	TRUE	TRUE	NINDS	8089915	40399	PA-10-063	4R00NS062128-03	R00
NIDDK	9745602	6/21/19 0:00	PA-16-193	5K99DK115778-02	5	K99	DK	115778	2		SASLOWSKY DAVID E	7/16/18 0:00	7/15/20 0:00	Digestive Diseases and Nutrition C Study Section[DDK-C]	12015184	13	INTERNAL MEDICINE/MEDICINE	621889815	QHF5ZZ114M72	621889815	QHF5ZZ114M72	US	40.8415	-73.9414	1833205	COLUMBIA_U_HEALTH_SCI	NEW YORK	NY	SCHOOLS OF MEDICINE	100323725	UNITED STATES	N	43662	44027	847	Other Research-Related	7/11/05 0:00	5/3/40 0:00	NIDDK	87783	Private	TRUE	FALSE	NIDDK	10201897	44026	PA-16-193	4R00DK115778-03	R00
NEI	7491016	8/12/08 0:00	PA-06-133	5K99EY018407-02	5	K99	EY	18407	2		OBERDORFER MICHAEL	9/1/07 0:00	8/31/09 0:00	ZEY1-VSN(03)	2218161	3	NEUROLOGY	42250712	GM1XX56LEP58	42250712	GM1XX56LEP58	US	39.953462	-75.193983	6463801	U_OF_PENNSYLVANIA	PHILADELPHIA	PA	SCHOOLS OF MEDICINE	191046205	UNITED STATES	N	39692	40056	867	Other Research-Related	6/30/05 0:00	6/21/10 0:00	NEI	76874	Private	FALSE	FALSE	NEI	8035732	40280	PA-07-297	4R00EY018407-03	R00
NIDDK	8129645	8/17/11 0:00	PA-09-036	5K99DK088360-02	5	K99	DK	88360	2		PODSKALNY JUDITH M	8/20/10 0:00	6/30/13 0:00	Digestive Diseases and Nutrition C Study Section[DDK-C]	9790393	10	UnavaiLABle	623216371	G4ALRBCZ52G7	623216371	G4ALRBCZ52G7	US	40.758211	-73.961227	7924903	ST_LUKES-ROOSEVELT_INST_FOR_HLTH_ SCI	NEW YORK	NY	Research Institutes	10025	UNITED STATES	N	40725	41455	847	Other Research-Related	7/3/05 0:00	11/29/45 0:00	NIDDK	89819	Private	FALSE	FALSE	NIDDK	8709738	41532	PA-09-036	4R00DK088360-03	R00
NIBIB	8088224	6/10/11 0:00	PA-09-036	5K99EB011889-02	5	K99	EB	11889	2		ERIM ZEYNEP	6/10/10 0:00	5/31/12 0:00	ZEB1-OSR-C(J1)S	8873986	8	UnavaiLABle	73130411	FLJ7DQKLL226	73130411	FLJ7DQKLL226	US	42.363198	-71.068772	4907701	MASSACHUSETTS_GENERAL_HOSP	BOSTON	MA	Independent Hospitals	21142621	UNITED STATES	N	40695	41060	286	Other Research-Related	7/3/05 0:00	9/7/61 0:00	NIBIB	95580	Private	TRUE	TRUE	NIBIB	8459212	41059		4R00EB011889-03	R00
NINDS	8931100	6/23/15 0:00	PA-14-042	5K99NS089858-02	5	K99	NS	89858	2		WHITTEMORE VICKY R	9/30/14 0:00	7/31/16 0:00	NST-2 Study Section [NST-2]	11230297	7	UnavaiLABle	605799469	HD1WMN6945W6	605799469	HD1WMN6945W6	US	47.660307	-122.315168	9087701	U_OF_WASHINGTON	SEATTLE	WA	Domestic Higher Education	981959472	UNITED STATES	N	42217	42582	853	Other Research-Related	7/7/05 0:00	5/31/49 0:00	NINDS	91098	Public	FALSE	FALSE	NINDS	9341653	42639	PA-14-042	4R00NS089858-03	R00
NIEHS	9488012	5/16/18 0:00	PA-16-193	5K99ES027023-02	5	K99	ES	27023	2		BOYLES ABEE	6/1/17 0:00	5/31/19 0:00	ZES1-LWJ-D(K)	10253344	13	NONE	124726725	GS3YEVSS12N6	124726725	GS3YEVSS12N6	US	37.870017	-122.268624	577502	U_OF_CALIFORNIA_BERKELEY	BERKELEY	CA	SCHOOLS OF PUBLIC HEALTH	947101749	UNITED STATES	N	43252	43616	113	Other Research-Related	7/10/05 0:00	6/6/76 0:00	NIEHS	100966	public	FALSE	FALSE	NIEHS	9933124	43719	PA-16-193	4R00ES027023-03	R00
NHGRI	8692560	6/30/14 0:00	PA-11-197	5K99HG007229-02	5	K99	HG	7229	2		RAMOS ERIN	7/1/13 0:00	6/30/15 0:00	Genome Research Study Section[GNOM-G]	8549153	7	UnavaiLABle	30811269	QN6MS4VN7BD1	30811269	QN6MS4VN7BD1	US	42.336107	-71.107481	1080401	BRIGHAM_&_WOMENS_HOSP	BOSTON	MA	Independent Hospitals	21156110	UNITED STATES	N	41821	42185	172	Other Research-Related	7/6/05 0:00	8/24/98 0:00	NHGRI	109080	Private	TRUE	TRUE	NHGRI	9071644	42205	PA-11-197	4R00HG007229-03	R00
NCI	10207557	6/28/21	PA-19-130	5K99CA245122-02	5	K99	CA	245122	2		SCHMIDT MICHAEL K	7/1/20	8/31/21	Transition to Independence Study Section (I)[NCI-I]	14585964	12	INTERNAL MEDICINE/MEDICINE	94878337	KMH5K9V7S518	94878337	KMH5K9V7S518	US	37.767442	-122.413937	577508	U_OF_CALIFORNIA_SAN_FRANCISCO	SAN FRANCISCO	CA	SCHOOLS OF MEDICINE	941432510	UNITED STATES	N	7/1/21	8/31/21	398	Other Research-Related	7/13/05 0:00	1/26/93 0:00	NCI	107044	public	FALSE	FALSE	NCI	10447981	##########	PA-19-130	4R00CA245122-03	R00
NIA	9330756	5/4/17 0:00	PA-15-083	5K99AG051711-02	5	K99	AG	51711	2		WISE BRADLEY C	8/15/16 0:00	8/31/17 0:00	Basic Neuroscience of Aging Study Section[NIA-N]	9548641	18	NEUROLOGY	9214214	HJD6G4D6TJY5	9214214	HJD6G4D6TJY5	US	37.426852	-122.17047	8046501	STANFORD_U	STANFORD	CA	SCHOOLS OF MEDICINE	943052004	UNITED STATES	N	42870	42978	866	Other Research-Related	7/9/05 0:00	7/31/49 0:00	NIA	127683	Private	FALSE	FALSE	NIA	9563524	42994	PA-15-083	4R00AG051711-03	R00
NIDA	10125987	3/26/21	PA-19-130	5K99DA049862-02	5	K99	DA	49862	2		LIN YU	4/1/20	12/31/21	ZDA1-SXM-M(02)S	11389070	7	ANESTHESIOLOGY	605799469	HD1WMN6945W6	605799469	HD1WMN6945W6	US	47.660307	-122.315168	9087701	U_OF_WASHINGTON	SEATTLE	WA	SCHOOLS OF MEDICINE	981959472	UNITED STATES	N	4/1/21	12/31/21	279	Other Research-Related	7/13/05 0:00	10/8/88 0:00	NIDA	141997	Public	FALSE	FALSE	NIDA	10533991	2/11/22	PA-19-130	4R00DA049862-03	R00
NIEHS	7713286	40056	PA-07-297	1K99ES017477-01	1	K99	ES	17477	1		SHREFFLER CAROL A	40057	40421	ZES1-LKB-J(K9)1	9144539	7	PATHOLOGY	605799469	HD1WMN6945W6	605799469	HD1WMN6945W6	US	47.660307	-122.315168	9087701	U_OF_WASHINGTON	SEATTLE	WA	SCHOOLS OF MEDICINE	981959472	UNITED STATES	N	40057	40421	113	Other Research-Related	2009	79017	NIEHS	79017	Public	FALSE	FALSE	NIEHS	8119194	40424	PA-07-297	4R00ES017477-03	R00
NIDDK	8061633	3/28/11 0:00	PA-09-036	5K99DK084259-02	5	K99	DK	84259	2		BISHOP TERRY ROGERS	4/15/10 0:00	3/31/12 0:00	Kidney Urologic and Hematologic Diseases D Study Section[DDK-D]	9640952	9	PEDIATRICS	51113330	FXKMA43NTV21	51113330	FXKMA43NTV21	US	29.70926	-95.400851	481201	BAYLOR_COLL_OF_MED	HOUSTON	TX	SCHOOLS OF MEDICINE	770303411	UNITED STATES	N	40634	40999	847	Other Research-Related	7/3/05 0:00	11/12/52 0:00	NIDDK	92359	Private	FALSE	FALSE	NIDDK	8413087	40987		4R00DK084259-03	R00
NEI	10395288	7/29/21	PA-20-272	3K99EY029011-02S1	3	K99	EY	29011	2	S	AGARWAL NEERAJ	5/1/19	12/31/21		12535657	7	BIOCHEMISTRY	1910777	FTMTDMBR29C7	1910777	FTMTDMBR29C7	US	39.325256	-76.605131	4134401	JOHNS_HOPKINS_U	BALTIMORE	MD	SCHOOLS OF MEDICINE	212182680	UNITED STATES	N	5/1/21	12/31/21	867	Other Research-Related	7/13/05 0:00	7/11/43 0:00	NEI	88947	Private	TRUE	TRUE	NEI	10527601	1/28/22	PA-18-398	4R00EY029011-03	R00
NIA	9137601	5/31/16 0:00	PA-14-042	5K99AG049958-02	5	K99	AG	49958	2		WILLIAMS JOHN	9/15/15 0:00	5/31/18 0:00	Biological Aging Study Section[NIA-B]	7722509	18	PATHOLOGY	9214214	HJD6G4D6TJY5	9214214	HJD6G4D6TJY5	US	37.426852	-122.17047	8046501	STANFORD_U	STANFORD	CA	SCHOOLS OF MEDICINE	943052004	UNITED STATES	N	42522	43251	866	Other Research-Related	7/8/05 0:00	7/31/49 0:00	NIA	127683	Private	FALSE	TRUE	NIA	9780833	43364	PA-14-042	4R00AG049958-03	R00
NIMH	8545222	9/3/13 0:00	PA-11-197	5K99MH099093-02	5	K99	MH	99093	2		DESMOND NANCY L	9/13/12 0:00	6/30/14 0:00	ZMH1-ERB-L(06)	10487541	4	OTHER BASIC SCIENCES	44387793	TP7EK8DZV6N5	44387793	TP7EK8DZV6N5	US	36.007766	-78.926475	2221101	DUKE_U	DURHAM	NC	SCHOOLS OF ARTS AND SCIENCES	277054673	UNITED STATES	N	41518	41820	242	Other Research-Related	7/5/05 0:00	11/28/24 0:00	NIMH	82148	Private	FALSE	FALSE	NIMH	8878644	41838	PA-11-197	4R00MH099093-03	R00
NINDS	10069412	11/19/20	PA-19-130	5K99NS114166-02	5	K99	NS	114166	2		GNADT JAMES W	12/15/19	7/1/21	NST-2 Study Section [NST-2]	15834305	12	NEUROSCIENCES	60217502	YNT8TCJH8FQ8	60217502	YNT8TCJH8FQ8	US	40.7607	-73.9603	1514803	WEILL_MED_COLL_OF_CORNELL_U	NEW YORK	NY	SCHOOLS OF MEDICINE	100654805	UNITED STATES	N	12/1/20	7/1/21	853	Other Research-Related	7/13/05 0:00	1/13/89 0:00	NINDS	105570	Private	FALSE	FALSE	NINDS	10460016	11/2/21	PA-19-130	4R00NS114166-03	R00
NHLBI	7921448	8/12/10 0:00	PA-07-297	5K99HL096955-02	5	K99	HL	96955	2		COLOMBINI-HATCH SANDRA	9/1/09 0:00	7/31/11 0:00	ZHL1-CSR-Z(M3)	2245825	7	INTERNAL MEDICINE/MEDICINE	1910777	FTMTDMBR29C7	1910777	FTMTDMBR29C7	US	39.325256	-76.605131	4134401	JOHNS_HOPKINS_U	BALTIMORE	MD	SCHOOLS OF MEDICINE	212182680	UNITED STATES	N	40391	40755	837	Other Research-Related	7/2/05 0:00	10/7/67 0:00	NHLBI	134325	Private	TRUE	TRUE	NHLBI	8307142	40805	PA-07-297	4R00HL096955-03	R00
NIDCR	9348626	42965	PA-16-077	5K99DE025915-02	5	K99	DE	25915	2		FRIEDEN LESLIE A	42620	43557	ZDE1-LC(04)	12355940	3	ANATOMY/CELL BIOLOGY	42250712	GM1XX56LEP58	42250712	GM1XX56LEP58	US	39.953462	-75.193983	6463801	U_OF_PENNSYLVANIA	PHILADELPHIA	PA	SCHOOLS OF DENTISTRY/ORAL HYGN	191046205	UNITED STATES	N	42979	43557	121	Other Research-Related	2017	70779	NIDCR	70779	Private	FALSE	TRUE	NIDCR	9868436	43558	PA-16-077	4R00DE025915-03	R00
NCI	9976205	4/8/20 0:00	PA-19-130	1K99CA240896-01A1	1	K99	CA	240896	1	A	SCHMIDT MICHAEL K	4/8/20 0:00	8/31/20 0:00	Transition to Independence Study Section (I)[NCI(B)-I]	14775034	9	BIOLOGY	800772139	S3GMKS8ELA16	800772139	S3GMKS8ELA16	US	29.706319	-95.397195	578407	U_OF_TX_MD_ANDERSON_CAN_CTR	HOUSTON	TX	HOSPITALS	770304009	UNITED STATES	N	43929	44074	398	Other Research-Related	7/12/05 0:00	11/29/95 0:00	NCI	108081	Public	FALSE	FALSE	NCI	10247153	44085	PA-19-130	4R00CA240896-02	R00
NICHD	7324834	1/3/08 0:00	PA-06-133	5K99HD055052-02	5	K99	HD	55052	2		TASCA RICHARD J	12/1/06 0:00	1/4/08 0:00	Developmental Biology Study Section[CHHD-C]	8195995	18	ANATOMY/CELL BIOLOGY	9214214	HJD6G4D6TJY5	9214214	HJD6G4D6TJY5	US	37.426852	-122.17047	8046501	STANFORD_U	STANFORD	CA	SCHOOLS OF MEDICINE	943052004	UNITED STATES	N	39417	39451	864	Other Research-Related	6/30/05 0:00	7/13/20 0:00	NICHD	7500	Private	FALSE	FALSE	NICHD	7496818	39450		4R00HD055052-03	R00
NLM	8820357	4/16/15 0:00	PA-14-042	1K99LM011933-01A1	1	K99	LM	11933	1	A	SIM HUA-CHUAN	5/1/15 0:00	4/30/16 0:00	Biomedical Informatics Library and Data Sciences Review Committee[BLR]	10576401	5	INTERNAL MEDICINE/MEDICINE	965717143	GTNBNWXJ12D5	965717143	DWH7MSXKA2A8; GTNBNWXJ12D5	US	36.143381	-86.803365	8721001	VANDERBILT_U	Nashville	TN	SCHOOLS OF MEDICINE	372032408	UNITED STATES	N	42125	42490	879	Other Research-Related	7/7/05 0:00	5/6/35 0:00	NLM	85959	Private	FALSE	FALSE	NLM	9260987	42482	PA-14-042	4R00LM011933-02	R00
NIDDK	10007811	8/24/20 0:00	PA-19-130	5K99DK123407-02	5	K99	DK	123407	2		SASLOWSKY DAVID E	9/4/19 0:00	12/31/20 0:00	Digestive Diseases and Nutrition C Study Section[DDK-C]	15244007	7	MISCELLANEOUS	1425594	E2NYLCDML6V1	1425594	E2NYLCDML6V1	US	42.359128	-71.093339	4911501	MASSACHUSETTS_INST_OF_TECH	CAMBRIDGE	MA	ORGANIZED RESEARCH UNITS	21421029	UNITED STATES	N	44075	44196	847	Other Research-Related	7/12/05 0:00	5/29/46 0:00	NIDDK	90000	Private	FALSE	FALSE	NIDDK	10333023	44257	PA-19-130	4R00DK123407-03	R00
NHLBI	8399062	10/30/12 0:00	PA-10-063	5K99HL107642-02	5	K99	HL	107642	2		CARLSON DREW E	1/1/12 0:00	1/19/14 0:00	ZHL1-CSR-P(O2)	10217223	7	UnavaiLABle	30811269	QN6MS4VN7BD1	30811269	QN6MS4VN7BD1	US	42.336107	-71.107481	1080401	BRIGHAM_&_WOMENS_HOSP	BOSTON	MA	Independent Hospitals	21156110	UNITED STATES	N	41244	41658	837	Other Research-Related	7/5/05 0:00	9/29/77 0:00	NHLBI	137970	Private	TRUE	TRUE	NHLBI	8780804	41656	PA-10-063	4R00HL107642-03	R00
NHLBI	8133955	40710	PA-09-036	5K99HL097068-02	5	K99	HL	97068	2		NI HANYU	40422	41304	ZHL1-CSR-Z(M2)	9635226	7	UnavaiLABle	30811269	QN6MS4VN7BD1	30811269	QN6MS4VN7BD1	US	42.336107	-71.107481	1080401	BRIGHAM_&_WOMENS_HOSP	BOSTON	MA	Independent Hospitals	21156110	UNITED STATES	N	40725	41304	837	Other Research-Related	2011	117273	NHLBI	117273	Private	TRUE	TRUE	NHLBI	8599807	41348	PA-09-036	4R00HL097068-03	R00
NCI	9109581	5/12/16 0:00	PA-14-042	5K99CA190658-02	5	K99	CA	190658	2		SCHMIDT MICHAEL K	7/13/15 0:00	12/31/16 0:00	Transition to Independence Study Section (I)[NCI-I]	10777000	12	BIOLOGY	71037113	LHGDNJMZ64Y1	71037113	LHGDNJMZ64Y1	US	40.763746	-73.955386	7056601	ROCKEFELLER_U	NEW YORK	NY	GRADUATE SCHOOLS	100656399	UNITED STATES	N	42552	42735	398	Other Research-Related	7/8/05 0:00	6/14/23 0:00	NCI	118139	Private	FALSE	FALSE	NCI	9391828	42733	PA-14-042	4R00CA190658-03	R00
NHLBI	8707877	6/6/14 0:00	PA-11-197	5K99HL114651-02	5	K99	HL	114651	2		TIGNO XENIA	8/1/13 0:00	9/30/15 0:00	ZHL1-CSR-P(F2)	11135703	7	UnavaiLABle	30811269	QN6MS4VN7BD1	30811269	QN6MS4VN7BD1	US	42.336107	-71.107481	1080401	BRIGHAM_&_WOMENS_HOSP	BOSTON	MA	Independent Hospitals	21156110	UNITED STATES	N	41821	42277	837	Other Research-Related	7/6/05 0:00	7/12/75 0:00	NHLBI	137160	Private	FALSE	FALSE	NHLBI	9278325	42536	PA-11-197	4R00HL114651-03	R00
NEI	9461069	3/9/18 0:00	PA-16-193	5K99EY027844-02	5	K99	EY	27844	2		AGARWAL NEERAJ	4/1/17 0:00	3/31/19 0:00	ZEY1-VSN(02)	11659586	7	NEUROSCIENCES	1910777	FTMTDMBR29C7	1910777	FTMTDMBR29C7	US	39.325256	-76.605131	4134401	JOHNS_HOPKINS_U	BALTIMORE	MD	SCHOOLS OF MEDICINE	212182680	UNITED STATES	N	43191	43555	867	Other Research-Related	7/10/05 0:00	7/9/80 0:00	NEI	102460	Private	FALSE	FALSE	NEI	9977379	43714	PA-16-193	4R00EY027844-03	R00
NHLBI	7475127	5/27/08 0:00	PA-06-133	5K99HL089185-02	5	K99	HL	89185	2		CARLSON DREW E	8/1/07 0:00	9/24/08 0:00	ZHL1-CSR-S(M1)	8717064	33	CHEMISTRY	92530369	RN64EPNH8JC6	92530369	RN64EPNH8JC6	US	34.070199	-118.45102	577505	U_OF_CALIFORNIA_LOS_ANGELES	LOS ANGELES	CA	SCHOOLS OF ARTS AND SCIENCES	900952000	UNITED STATES	N	39661	39715	837	Other Research-Related	6/30/05 0:00	5/29/46 0:00	NHLBI	90000	Public	FALSE	FALSE	NHLBI	7651877	39715	PA-06-133	4R00HL089185-03	R00
NINDS	7322811	11/30/07 0:00	PA-06-133	5K99NS057931-02	5	K99	NS	57931	2		TALLEY EDMUND M	12/1/06 0:00	9/14/08 0:00	ZNS1-SRB-M(38)	8630492	18	BIOLOGY	9214214	HJD6G4D6TJY5	9214214	HJD6G4D6TJY5	US	37.426852	-122.17047	8046501	STANFORD_U	STANFORD	CA	SCHOOLS OF ARTS AND SCIENCES	943052004	UNITED STATES	N	39417	39705	853	Other Research-Related	6/30/05 0:00	5/29/46 0:00	NINDS	90000	Private	FALSE	FALSE	NINDS	7682632	39709		4R00NS057931-03	R00
NIDA	9452057	3/26/18 0:00	PA-16-193	5K99DA043609-02	5	K99	DA	43609	2		LIN YU	5/1/17 0:00	4/30/19 0:00	ZDA1-SXM-M(03)S	10742197	18	ANESTHESIOLOGY	9214214	HJD6G4D6TJY5	9214214	HJD6G4D6TJY5	US	37.426852	-122.17047	8046501	STANFORD_U	STANFORD	CA	SCHOOLS OF MEDICINE	943052004	UNITED STATES	N	43221	43585	279	Other Research-Related	7/10/05 0:00	8/21/78 0:00	NIDA	174820	Private	FALSE	FALSE	NIDA	9840964	43584	PA-16-193	4R00DA043609-03	R00
NIBIB	8120348	7/26/11 0:00	PA-09-036	5K99EB012165-02	5	K99	EB	12165	2		ERIM ZEYNEP	8/1/10 0:00	6/30/12 0:00	ZEB1-OSR-C(M1)	9849027	13	RADIATION-DIAGNOSTIC/ONCOLOGY	78861598	C8H9CNG1VBD9	78861598	C8H9CNG1VBD9	US	40.790284	-73.946781	3839801	ICAHN_SCH_OF_MED_AT_MOUNT_SINAI	NEW YORK	NY	SCHOOLS OF MEDICINE	100296574	UNITED STATES	N	40756	41090	286	Other Research-Related	7/3/05 0:00	8/31/44 0:00	NIBIB	89364	Private	TRUE	FALSE	NIBIB	8474382	41075		4R00EB012165-03	R00
NCI	7470678	5/29/08 0:00	PA-06-133	5K99CA125994-02	5	K99	CA	125994	2		SCHMIDT MICHAEL K	7/18/07 0:00	6/30/09 0:00	ZCA1-RTRB-A(M1)	3111370	18	BIOMEDICAL ENGINEERING	9214214	HJD6G4D6TJY5	9214214	HJD6G4D6TJY5	US	37.426852	-122.17047	8046501	STANFORD_U	STANFORD	CA	SCHOOLS OF MEDICINE	943052004	UNITED STATES	N	39630	39994	398	Other Research-Related	6/30/05 0:00	5/4/76 0:00	NCI	137457	Private	TRUE	TRUE	NCI	7887002	40057	PA-06-133	4R00CA125994-03	R00
NIEHS	10260475	8/10/21	PA-19-130	5K99ES032029-02	5	K99	ES	32029	2		BOYLES ABEE	9/11/20	8/31/22	ZES1-LAT-K(K9)	11589068	13	PUBLIC HEALTH & PREV MEDICINE	78861598	C8H9CNG1VBD9	78861598	C8H9CNG1VBD9	US	40.790284	-73.946781	3839801	ICAHN_SCH_OF_MED_AT_MOUNT_SINAI	NEW YORK	NY	SCHOOLS OF MEDICINE	100296574	UNITED STATES	N	9/1/21	8/31/22	113	Other Research-Related	7/13/05 0:00	10/15/85 0:00	NIEHS	104384	Private	FALSE	FALSE	NIEHS	10637607	9/8/22	PA-19-130	4R00ES032029-03	R00
NINDS	10282471	7/7/21	PA-20-188	1K99NS123242-01	1	K99	NS	123242	1		GUBITZ AMELIE	7/15/21	7/14/22	NST-2 Study Section [NST-2]	12500184	7	NEUROSCIENCES	1910777	FTMTDMBR29C7	1910777	FTMTDMBR29C7	US	39.325256	-76.605131	4134401	JOHNS_HOPKINS_U	BALTIMORE	MD	SCHOOLS OF MEDICINE	212182680	UNITED STATES	N	7/15/21	7/14/22	853	Other Research-Related	7/13/05 0:00	4/22/56 0:00	NIA	130140	Private	TRUE	TRUE	NINDS	10706361	9/21/22	PA-20-188	4R00NS123242-02	R00
NIGMS	8091077	3/10/11 0:00	PA-10-063	1K99GM097096-01	1	K99	GM	97096	1		OKITA RICHARD T	4/1/11 0:00	3/31/12 0:00	ZGM1-BRT-9(KR)	9247085	7	BIOCHEMISTRY	47006379	JDLVAVGYJQ21	47006379	JDLVAVGYJQ21	US	42.335672	-71.104237	3212902	HARVARD_MED_SCH	BOSTON	MA	SCHOOLS OF MEDICINE	21201616	UNITED STATES	N	40634	40999	859	Other Research-Related	7/3/05 0:00	5/29/46 0:00	NIGMS	90000	Private	FALSE	FALSE	NIGMS	8446750	41011		4R00GM097096-02	R00
NIDDK	9991844	8/11/20 0:00	PA-18-398	5K99DK122019-02	5	K99	DK	122019	2		LAUGHLIN MAREN R	9/5/19 0:00	8/26/21 0:00	Diabetes Endocrinology and Metabolic Diseases B Study Section[DDK-B]	14626371	30	INTERNAL MEDICINE/MEDICINE	800771545	YZJ6DKPM4W63	800771545	YZJ6DKPM4W63	US	32.811963	-96.837534	578404	UT_SOUTHWESTERN_MED_CTR	DALLAS	TX	SCHOOLS OF MEDICINE	753909105	UNITED STATES	N	44079	44434	847	Other Research-Related	7/12/05 0:00	5/29/46 0:00	NIDDK	90000	Public	FALSE	FALSE	NIDDK	10447851	##########	PA-18-398	4R00DK122019-03	R00
NINDS	7324113	39436	PA-06-133	5K99NS057906-02	5	K99	NS	57906	2		MAMOUNAS LAURA	39052	39691	ZNS1-SRB-M(38)	8630248	18	PHYSICS	9214214	HJD6G4D6TJY5	9214214	HJD6G4D6TJY5	US	37.426852	-122.17047	8046501	STANFORD_U	STANFORD	CA	SCHOOLS OF ARTS AND SCIENCES	943052004	UNITED STATES	N	39417	39691	853	Other Research-Related	2008	59238	NINDS	59238	Private	TRUE	TRUE	NINDS	7675579	39696	PA-07-297	4R00NS057906-03	R00
NHLBI	8122310	9/1/11 0:00	PA-09-036	5K99HL103973-02	5	K99	HL	103973	2		COLOMBINI-HATCH SANDRA	8/9/10 0:00	6/30/12 0:00	ZHL1-CSR-Z(M2)	10236857	7	INTERNAL MEDICINE/MEDICINE	1910777	FTMTDMBR29C7	1910777	FTMTDMBR29C7	US	39.325256	-76.605131	4134401	JOHNS_HOPKINS_U	BALTIMORE	MD	SCHOOLS OF MEDICINE	212182680	UNITED STATES	N	40725	41090	837	Other Research-Related	7/3/05 0:00	4/23/73 0:00	NHLBI	136350	Private	TRUE	TRUE	NHLBI	8527234	41152	PA-11-197	4R00HL103973-03	R00
NCI	10090582	1/18/21	RFA-CA-19-029	5K99CA246063-02	5	K99	CA	246063	2		RADAEV SERGEY	2/1/20	1/31/22	ZCA1-TCRB-T(O2)	14153859	37	PUBLIC HEALTH & PREV MEDICINE	72933393	G88KLJR3KYT5	72933393	G88KLJR3KYT5	US	34.017282	-118.281254	7636101	U_OF_SOUTHERN_CALIFORNIA	Los Angeles	CA	SCHOOLS OF MEDICINE	900894304	UNITED STATES	N	2/1/21	1/31/22	398	Other Research-Related	7/13/05 0:00	11/2/36 0:00	NCI	123029	Private	FALSE	FALSE	NCI	10547987	6/14/22	RFA-CA-19-029	4R00CA246063-03	R00
NEI	9787171	8/29/19 0:00	PA-16-193	5K99EY029010-02	5	K99	EY	29010	2		AGARWAL NEERAJ	9/30/18 0:00	8/31/21 0:00	ZEY1-VSN(02)	12238247	7	OPHTHALMOLOGY	1910777	FTMTDMBR29C7	1910777	FTMTDMBR29C7	US	39.325256	-76.605131	4134401	JOHNS_HOPKINS_U	BALTIMORE	MD	SCHOOLS OF MEDICINE	212182680	UNITED STATES	N	43709	44439	867	Other Research-Related	7/11/05 0:00	12/18/54 0:00	NEI	93125	Private	TRUE	FALSE	NEI	10592679	8/19/22	PA-16-193	4R00EY029010-03	R00
NHLBI	7684670	40030	PA-07-297	5K99HL089710-02	5	K99	HL	89710	2		COLOMBINI-HATCH SANDRA	39696	40755	ZHL1-CSR-S(M1)	8786834	7	NUTRITION	149617367	UNVDZNFA8R29	149617367	UNVDZNFA8R29	US	42.335306	-71.102775	3212904	HARVARD_SCH_OF_PUBLIC_HEALTH	BOSTON	MA	SCHOOLS OF PUBLIC HEALTH	21156028	UNITED STATES	N	40026	40755	837	Other Research-Related	2009	107304	NHLBI	54695	Private	FALSE	FALSE	NHLBI	8097023	40781	PA-10-063	4R00HL089710-03	R00
NIGMS	9773251	9/12/19 0:00	PA-16-193	5K99GM129460-02	5	K99	GM	129460	2		BARSKI OLEG	9/1/18 0:00	12/31/19 0:00	ZGM1-TWD-8(KR)	12610284	12	CHEMISTRY	2484665	NJ1YPQXQG7U5	2484665	NJ1YPQXQG7U5	US	40.345441	-74.655866	6661401	PRINCETON_U	Princeton	NJ	GRADUATE SCHOOLS	85406000	UNITED STATES	N	43709	43830	859	Other Research-Related	7/11/05 0:00	11/26/89 0:00	NIGMS	32838	Private	TRUE	FALSE	NIGMS	10105429	43980	PA-16-193	4R00GM129460-03	R00
NCI	9355137	8/16/17 0:00	PA-16-077	5K99CA212621-02	5	K99	CA	212621	2		SCHMIDT MICHAEL K	9/20/16 0:00	5/31/18 0:00	Transition to Independence Study Section (I)[NCI-I]	14377696	7	UnavaiLABle	30811269	QN6MS4VN7BD1	30811269	QN6MS4VN7BD1	US	42.336107	-71.107481	1080401	BRIGHAM_&_WOMENS_HOSP	BOSTON	MA	Independent Hospitals	21156110	UNITED STATES	N	42979	43251	398	Other Research-Related	7/9/05 0:00	6/6/75 0:00	NCI	137124	Private	FALSE	FALSE	NCI	9692843	43236	PA-16-077	4R00CA212621-03	R00
NIAID	7245991	3/28/07 0:00	PA-06-133	1K99AI073682-01	1	K99	AI	73682	1		PROGRAIS LAWRENCE J	4/1/07 0:00	12/31/07 0:00	Allergy Immunology and Transplantation Research Committee[AITC]	8651182	18	PATHOLOGY	9214214	HJD6G4D6TJY5	9214214	HJD6G4D6TJY5	US	37.426852	-122.17047	8046501	STANFORD_U	STANFORD	CA	SCHOOLS OF MEDICINE	943052004	UNITED STATES	N	39173	39447	855	Other Research-Related	6/29/05 0:00	3/9/34 0:00	NIAID	85536	Private	FALSE	FALSE	NIAID	7531554	39433	PA-07-297	4R00AI073682-02	R00
NIDDK	9129657	8/12/16 0:00	PA-14-042	5K99DK106655-02	5	K99	DK	106655	2		RANKIN TRACY L	8/19/15 0:00	10/31/16 0:00	Kidney Urologic and Hematologic Diseases D Study Section[DDK-D]	10841317	7	UnavaiLABle	76593722	Z1L9F1MM1RY3	76593722	Z1L9F1MM1RY3	US	42.337481	-71.104964	1504801	BOSTON_CHILDRENS_HOSP	BOSTON	MA	Independent Hospitals	21155724	UNITED STATES	N	42583	42674	847	Other Research-Related	7/8/05 0:00	5/29/46 0:00	NIDDK	90000	Private	FALSE	FALSE	NIDDK	9394276	42802	PA-14-042	4R00DK106655-03	R00
NIDCR	7655283	6/18/09 0:00	PA-07-297	5K99DE018739-02	5	K99	DE	18739	2		FRIEDEN LESLIE A	8/1/08 0:00	7/31/10 0:00	NIDCR Special Grants Review Committee[DSR]	6994180	13	PUBLIC HEALTH & PREV MEDICINE	621889815	QHF5ZZ114M72	621889815	QHF5ZZ114M72	US	40.8415	-73.9414	1833205	COLUMBIA_U_HEALTH_SCI	NEW YORK	NY	SCHOOLS OF PUBLIC HEALTH	100323725	UNITED STATES	N	40026	40390	121	Other Research-Related	7/1/05 0:00	5/7/46 0:00	FIC	89977	Private	TRUE	TRUE	NIDCR	8075185	40388	PA-10-063	4R00DE018739-03	R00
NIAAA	7447971	6/5/08 0:00	PA-07-297	1K99AA017870-01	1	K99	AA	17870	1		JUNG KATHY	6/5/08 0:00	5/31/09 0:00	Digestive Diseases and Nutrition C Study Section[DDK-C]	9043723	5	VETERINARY SCIENCES	66469933	S352L5PJLMP8	66469933	S352L5PJLMP8	US	33.791247	-84.3249	2384501	EMORY_U	ATLANTA	GA	PRIMATE CENTERS	303221007	UNITED STATES	N	39604	39964	273	Other Research-Related	6/30/05 0:00	10/28/32 0:00	NIAAA	85039	Private	TRUE	TRUE	NIAAA	7893291	40070		4R00AA017870-02	R00
NIGMS	8627185	2/26/14 0:00	PA-11-197	5K99GM099796-02	5	K99	GM	99796	2		GERRATANA BARBARA	3/1/13 0:00	6/30/14 0:00	ZGM1-BRT-X(KR)	7742254	7	BIOCHEMISTRY	47006379	JDLVAVGYJQ21	47006379	JDLVAVGYJQ21	US	42.335672	-71.104237	3212902	HARVARD_MED_SCH	BOSTON	MA	SCHOOLS OF MEDICINE	21201616	UNITED STATES	N	41699	41820	859	Other Research-Related	7/6/05 0:00	8/22/81 0:00	NIGMS	29820	Private	FALSE	FALSE	NIGMS	8878462	41827	PA-11-197	4R00GM099796-03	R00
NIEHS	9756412	7/29/19 0:00	PA-16-193	5K99ES029571-02	5	K99	ES	29571	2		BOYLES ABEE	8/15/18 0:00	12/31/19 0:00	ZES1-LAT-D(K1)	12168707	13	PUBLIC HEALTH & PREV MEDICINE	78861598	C8H9CNG1VBD9	78861598	C8H9CNG1VBD9	US	40.790284	-73.946781	3839801	ICAHN_SCH_OF_MED_AT_MOUNT_SINAI	NEW YORK	NY	SCHOOLS OF MEDICINE	100296574	UNITED STATES	N	43678	43830	113	Other Research-Related	7/11/05 0:00	12/15/81 0:00	NIEHS	102984	Private	TRUE	FALSE	NIEHS	10050158	43876	PA-16-193	4R00ES029571-03	R00
NICHD	8424355	5/17/13 0:00	PA-11-197	1K99HD074670-01	1	K99	HD	74670	1		MUKHOPADHYAY MAHUA	5/20/13 0:00	4/30/14 0:00	Developmental Biology Study Section[CHHD-C]	10318224	12	BIOCHEMISTRY	2484665	NJ1YPQXQG7U5	2484665	NJ1YPQXQG7U5	US	40.345441	-74.655866	6661401	PRINCETON_U	Princeton	NJ	SCHOOLS OF ARTS AND SCIENCES	85406000	UNITED STATES	N	41414	41759	865	Other Research-Related	7/5/05 0:00	5/11/65 0:00	NICHD	96922	Private	FALSE	FALSE	NICHD	8839511	41795	PA-11-197	4R00HD074670-02	R00
AHRQ	8702135	7/11/14 0:00	RFA-HS-12-007	5K99HS022189-02	5	K99	HS	22189	2		WILLIS TAMARA	8/1/13 0:00	7/31/15 0:00	ZHS1-HSR-C(01)	10978604	4	OTHER CLINICAL SCIENCES	44387793	TP7EK8DZV6N5	44387793	TP7EK8DZV6N5	US	36.007766	-78.926475	2221101	DUKE_U	DURHAM	NC	SCHOOLS OF MEDICINE	277054673	UNITED STATES	N	41852	42216	226	Other Research-Related	7/6/05 0:00	11/17/71 0:00	AHRQ	135827	Private	FALSE	TRUE	AHRQ	9088537	42213	RFA-HS-12-007	4R00HS022189-03	R00
NINDS	8165396	7/1/11 0:00	PA-10-063	1K99NS075136-01	1	K99	NS	75136	1		TALLEY EDMUND M	7/1/11 0:00	6/30/12 0:00	NST-2 Study Section [NST-2]	10427435	7	BIOLOGY	47006379	JDLVAVGYJQ21	47006379	JDLVAVGYJQ21	US	42.335672	-71.104237	3212902	HARVARD_MED_SCH	BOSTON	MA	SCHOOLS OF MEDICINE	21201616	UNITED STATES	N	40725	41090	853	Other Research-Related	7/3/05 0:00	11/4/32 0:00	NINDS	85046	Private	FALSE	FALSE	NINDS	8481743	41089	PA-11-197	4R00NS075136-02	R00
NIAID	9598524	7/27/18 0:00	PA-16-193	1K99AI135031-01A1	1	K99	AI	135031	1	A	ALARCON RODOLFO M	7/27/18 0:00	9/15/19 0:00	Microbiology and Infectious Diseases B Research Study Section[MID-B]	12426793	18	INTERNAL MEDICINE/MEDICINE	9214214	HJD6G4D6TJY5	9214214	HJD6G4D6TJY5	US	37.426852	-122.17047	8046501	STANFORD_U	STANFORD	CA	SCHOOLS OF MEDICINE	943052004	UNITED STATES	N	43308	43723	855	Other Research-Related	7/10/05 0:00	12/31/61 0:00	NIAID	132219	Private	FALSE	FALSE	NIAID	10046745	43822	PA-16-193	4R00AI135031-02	R00
NIAID	9014078	5/31/16 0:00	PA-15-083	1K99AI121473-01	1	K99	AI	121473	1		GONDRE-LEWIS TIMOTHY A	6/1/16 0:00	8/31/16 0:00	Microbiology and Infectious Diseases Advisory Committee[MID]	11263437	12	MICROBIOLOGY/IMMUN/VIROLOGY	71037113	LHGDNJMZ64Y1	71037113	LHGDNJMZ64Y1	US	40.763746	-73.955386	7056601	ROCKEFELLER_U	NEW YORK	NY	GRADUATE SCHOOLS	100656399	UNITED STATES	N	42522	42613	855	Other Research-Related	7/8/05 0:00	5/3/60 0:00	NIAID	58564	Private	TRUE	FALSE	NIAID	9415534	42821	PA-15-083	4R00AI121473-02	R00
NCI	8534065	41488	PA-11-197	5K99CA166517-02	5	K99	CA	166517	2		SCHMIDT MICHAEL K	41153	41639	Institutional Training and Education Study Section (F)[NCI-F]	9662037	10	BIOLOGY	49179401	F4N1QNPB95M4	49179401	F4N1QNPB95M4	US	40.81207	-73.954377	1833202	COLUMBIA_U_NEW_YORK_MORNINGSIDE	NEW YORK	NY	GRADUATE SCHOOLS	100276900	UNITED STATES	N	41518	41639	398	Other Research-Related	2013	124994	NCI	124994	Private	TRUE	FALSE	NCI	8773654	41635	PA-11-197	4R00CA166517-03	R00
NCI	8146177	40753	PA-09-036	5K99CA151827-02	5	K99	CA	151827	2		SCHMIDT MICHAEL K	40443	41608	Institutional Training and Education Study Section (F)[NCI-F]	10250490	13	PATHOLOGY	621889815	QHF5ZZ114M72	621889815	QHF5ZZ114M72	US	40.8415	-73.9414	1833205	COLUMBIA_U_HEALTH_SCI	NEW YORK	NY	SCHOOLS OF MEDICINE	100323725	UNITED STATES	N	40787	41608	398	Other Research-Related	2011	144645	NCI	144645	Private	FALSE	FALSE	NCI	8785173	41705	PA-09-036	4R00CA151827-03	R00
NIA	9460990	4/5/18 0:00	PA-16-193	5K99AG053406-02	5	K99	AG	53406	2		GUO MAX	4/1/17 0:00	9/29/18 0:00	Biological Aging Study Section[NIA-B]	11729543	3	ANATOMY/CELL BIOLOGY	42250712	GM1XX56LEP58	42250712	GM1XX56LEP58	US	39.953462	-75.193983	6463801	U_OF_PENNSYLVANIA	PHILADELPHIA	PA	SCHOOLS OF MEDICINE	191046205	UNITED STATES	N	43205	43372	866	Other Research-Related	7/10/05 0:00	2/16/03 0:00	NIA	110716	Private	FALSE	FALSE	NIA	9789435	43365	PA-16-193	4R00AG053406-03	R00
NINDS	7941843	8/19/10 0:00	PA-09-036	5K99NS067239-02	5	K99	NS	67239	2		MAMOUNAS LAURA	9/30/09 0:00	11/30/10 0:00	NST-2 Study Section [NST-2]	6370147	12	BIOCHEMISTRY	71037113	LHGDNJMZ64Y1	71037113	LHGDNJMZ64Y1	US	40.763746	-73.955386	7056601	ROCKEFELLER_U	NEW YORK	NY	GRADUATE SCHOOLS	100656399	UNITED STATES	N	40422	40512	853	Other Research-Related	7/2/05 0:00	5/29/46 0:00	NINDS	90000	Private	FALSE	FALSE	NINDS	8179345	40511	PA-10-063	4R00NS067239-03	R00
NCI	9736659	5/20/19 0:00	PA-16-193	5K99CA230192-02	5	K99	CA	230192	2		SCHMIDT MICHAEL K	7/2/18 0:00	8/31/20 0:00	Transition to Independence Study Section (I)[NCI-I]	14726992	7	INTERNAL MEDICINE/MEDICINE	1910777	FTMTDMBR29C7	1910777	FTMTDMBR29C7	US	39.325256	-76.605131	4134401	JOHNS_HOPKINS_U	BALTIMORE	MD	SCHOOLS OF MEDICINE	212182680	UNITED STATES	N	43647	44074	398	Other Research-Related	7/11/05 0:00	1/17/45 0:00	NCI	89503	Private	TRUE	TRUE	NCI	10249484	44076	PA-16-193	4R00CA230192-03	R00
NCI	9113529	7/1/16 0:00	PA-14-042	5K99CA198857-02	5	K99	CA	198857	2		RADAEV SERGEY	8/1/15 0:00	7/31/17 0:00	Transition to Independence Study Section (I)[NCI-I]	11743221	8	UnavaiLABle	73130411	FLJ7DQKLL226	73130411	FLJ7DQKLL226	US	42.363198	-71.068772	4907701	MASSACHUSETTS_GENERAL_HOSP	BOSTON	MA	Independent Hospitals	21142621	UNITED STATES	N	42583	42947	398	Other Research-Related	7/8/05 0:00	3/29/90 0:00	NCI	179058	Private	TRUE	TRUE	NCI	9513108	42962	PA-14-042	4R00CA198857-03	R00
NCI	8488026	8/6/13 0:00	PA-11-197	1K99CA176376-01	1	K99	CA	176376	1		SCHMIDT MICHAEL K	8/6/13 0:00	7/31/15 0:00	Transition to Independence Study Section (I)[NCI-I]	11385850	12	UnavaiLABle	64931884	KUKXRCZ6NZC2	64931884	KUKXRCZ6NZC2	US	40.764045	-73.956024	5079202	SLOAN-KETTERING_INST_CAN_RES	NEW YORK	NY	Research Institutes	100656007	UNITED STATES	N	41492	42216	398	Other Research-Related	7/5/05 0:00	5/15/89 0:00	NCI	178740	Private	TRUE	FALSE	NCI	9189154	42492	PA-11-197	4R00CA176376-02	R00
NINR	7941697	7/29/10 0:00	PA-09-036	5K99NR011054-02	5	K99	NR	11054	2		HUSS KAREN	9/29/09 0:00	7/31/11 0:00	Nursing Science Review Committee[NRRC(45)]	7893133	4	OTHER HEALTH PROFESSIONS	44387793	TP7EK8DZV6N5	44387793	TP7EK8DZV6N5	US	36.007766	-78.926475	2221101	DUKE_U	DURHAM	NC	SCHOOLS OF NURSING	277054673	UNITED STATES	N	40391	40755	361	Other Research-Related	7/2/05 0:00	9/15/36 0:00	NINR	86457	Private	TRUE	TRUE	NINR	8298712	40760		4R00NR011054-03	R00
NIAMS	9105160	5/31/16 0:00	PA-14-042	5K99AR067283-02	5	K99	AR	67283	2		WANG FEI	7/2/15 0:00	1/6/17 0:00	Arthritis and Musculoskeletal and Skin Diseases Special Grants Study Section[AMS]	11149620	5	DENTISTRY	22254226	H6D6JMXJXDE6	22254226	H6D6JMXJXDE6	US	41.734182	-72.793791	1506603	U_OF_CONNECTICUT_SCH_OF_MED/DNT	FARMINGTON	CT	SCHOOLS OF DENTISTRY/ORAL HYGN	60305335	UNITED STATES	N	42552	42741	846	Other Research-Related	7/8/05 0:00	9/9/95 0:00	NIAMS	108000	Public	FALSE	FALSE	NIAMS	9377581	42794	PA-14-042	4R00AR067283-03	R00
NCI	7471745	5/28/08 0:00	PA-07-297	1K99CA127360-01A1	1	K99	CA	127360	1	A	SCHMIDT MICHAEL K	6/1/08 0:00	11/30/09 0:00	Institutional Training and Education Study Section (F)[NCI-F]	8665674	13	GENETICS	621889815	QHF5ZZ114M72	621889815	QHF5ZZ114M72	US	40.8415	-73.9414	1833205	COLUMBIA_U_HEALTH_SCI	NEW YORK	NY	SCHOOLS OF MEDICINE	100323725	UNITED STATES	N	39600	40147	398	Other Research-Related	6/30/05 0:00	4/4/12 0:00	NCI	114051	Private	FALSE	FALSE	NCI	8013458	40262	PA-07-297	4R00CA127360-02	R00
NICHD	9878901	3/4/20 0:00	PA-18-398	5K99HD097290-02	5	K99	HD	97290	2		KAU ALICE S	3/1/19 0:00	4/30/21 0:00	Biobehavioral and Behavioral Sciences Study Section[CHHD-H]	11581564	5	PEDIATRICS	66469933	S352L5PJLMP8	66469933	S352L5PJLMP8	US	33.791247	-84.3249	2384501	EMORY_U	ATLANTA	GA	SCHOOLS OF MEDICINE	303221007	UNITED STATES	N	43891	44316	865	Other Research-Related	7/12/05 0:00	4/2/76 0:00	NICHD	100901	Private	TRUE	TRUE	NICHD	10393206	##########	PA-18-398	4R00HD097290-03	R00
NIDCR	8497665	6/13/13 0:00	PAR-09-256	5K99DE022060-02	5	K99	DE	22060	2		FRIEDEN LESLIE A	7/1/12 0:00	6/30/14 0:00	NIDCR Special Grants Review Committee[DSR]	8759178	13	NONE	621889815	QHF5ZZ114M72	621889815	QHF5ZZ114M72	US	40.8415	-73.9414	1833205	COLUMBIA_U_HEALTH_SCI	NEW YORK	NY	SCHOOLS OF DENTISTRY/ORAL HYGN	100323725	UNITED STATES	N	41456	41820	121	Other Research-Related	7/5/05 0:00	7/16/69 0:00	NIDCR	134973	Private	FALSE	TRUE	NIDCR	8848591	41816	PAR-09-256	4R00DE022060-03	R00
NHGRI	8166365	9/5/11 0:00	PA-10-063	1K99HG006265-01	1	K99	HG	6265	1		VOLPI SIMONA	9/6/11 0:00	6/30/12 0:00	Genome Research Study Section[GNOM(M1)-G]	10602964	1	GENETICS	5421136	ZUE9HKT2CLC9	5421136	ZUE9HKT2CLC9	US	41.789554	-87.601172	1413601	U_OF_CHICAGO	CHICAGO	IL	SCHOOLS OF MEDICINE	606372612	UNITED STATES	N	40792	41090	172	Other Research-Related	7/3/05 0:00	2/15/45 0:00	NHGRI	89532	private	FALSE	FALSE	NHGRI	8520752	41152	PA-11-197	4R00HG006265-02	R00
NINDS	9163868	7/26/16 0:00	PA-15-083	1K99NS097618-01	1	K99	NS	97618	1		STEWART RANDALL R	8/1/16 0:00	7/31/17 0:00	NST-2 Study Section [NST-2]	11499819	5	UnavaiLABle	79917897	GYLUH9UXHDX5	79917897	GYLUH9UXHDX5	US	36.143784	-86.800995	10040927	VANDERBILT_U_MED_CTR	NASHVILLE	TN	Independent Hospitals	372320011	UNITED STATES	N	42583	42947	853	Other Research-Related	7/8/05 0:00	7/10/28 0:00	NINDS	83468	Private	TRUE	TRUE	NINDS	9533119	42969	PA-15-083	4R00NS097618-03	R00
NHGRI	9621393	12/28/18 0:00	PA-16-193	5K99HG009917-02	5	K99	HG	9917	2		PAZIN MICHAEL J	1/5/18 0:00	4/30/20 0:00	Genome Research Study Section[GNOM-G]	10711352	7	UnavaiLABle	623544785	H5G9NWEFHXN4	623544785	H5G9NWEFHXN4	US	42.363082	-71.087893	10021177	BROAD_INST_INC	CAMBRIDGE	MA	Research Institutes	21421027	UNITED STATES	N	43466	43951	172	Other Research-Related	7/11/05 0:00	9/14/88 0:00	NHGRI	32400	Private	FALSE	FALSE	NHGRI	10134673	43951	PA-16-193	4R00HG009917-03	R00
NCI	9756353	7/19/19 0:00	PA-16-193	5K99CA226342-02	5	K99	CA	226342	2		SCHMIDT MICHAEL K	8/9/18 0:00	5/31/20 0:00	Transition to Independence Study Section (I)[NCI-I]	15056131	12	UnavaiLABle	64931884	KUKXRCZ6NZC2	64931884	KUKXRCZ6NZC2	US	40.764045	-73.956024	5079202	SLOAN-KETTERING_INST_CAN_RES	NEW YORK	NY	Research Institutes	100656007	UNITED STATES	N	43678	43982	398	Other Research-Related	7/11/05 0:00	6/2/79 0:00	NCI	102057	Private	FALSE	FALSE	NCI	10139560	43959	PA-16-193	4R00CA226342-03	R00
NIAID	7448969	5/5/08 0:00	PA-07-297	1K99AI077800-01	1	K99	AI	77800	1		KOSHY RAJEN	5/15/08 0:00	4/30/09 0:00	Microbiology and Infectious Diseases B Research Study Section[MID-B]	2186837	12	MICROBIOLOGY/IMMUN/VIROLOGY	71037113	LHGDNJMZ64Y1	71037113	LHGDNJMZ64Y1	US	40.763746	-73.955386	7056601	ROCKEFELLER_U	NEW YORK	NY	GRADUATE SCHOOLS	100656399	UNITED STATES	N	39583	39933	855	Other Research-Related	6/30/05 0:00	5/29/46 0:00	NIAID	90000	Private	TRUE	FALSE	NIAID	7707255	39924		4R00AI077800-02	R00
NIAMS	7771407	40175	PA-09-036	1K99AR057817-01	1	K99	AR	57817	1		BAKER CARL	40179	40543	Arthritis and Musculoskeletal and Skin Diseases Special Grants Study Section[AMS]	9766610	12	BIOLOGY	71037113	LHGDNJMZ64Y1	71037113	LHGDNJMZ64Y1	US	40.763746	-73.955386	7056601	ROCKEFELLER_U	NEW YORK	NY	GRADUATE SCHOOLS	100656399	UNITED STATES	N	40179	40543	846	Other Research-Related	2010	90000	NIAMS	90000	Private	FALSE	FALSE	NIAMS	8207550	40588	PA-10-063	4R00AR057817-03	R00
NIAMS	8494575	6/17/13 0:00	PA-11-197	5K99AR063161-02	5	K99	AR	63161	2		BAKER CARL	7/1/12 0:00	5/30/14 0:00	Arthritis and Musculoskeletal and Skin Diseases Special Grants Study Section[AMS]	9418636	12	BIOLOGY	71037113	LHGDNJMZ64Y1	71037113	LHGDNJMZ64Y1	US	40.763746	-73.955386	7056601	ROCKEFELLER_U	NEW YORK	NY	GRADUATE SCHOOLS	100656399	UNITED STATES	N	41456	41789	846	Other Research-Related	7/5/05 0:00	4/11/62 0:00	NIAMS	95796	Private	FALSE	FALSE	NIAMS	8897563	41878	PA-11-197	4R00AR063161-03	R00
NCI	8112156	7/19/10 0:00	PA-07-297	7K99CA136759-02	7	K99	CA	136759	2		SCHMIDT MICHAEL K	7/1/09 0:00	8/31/10 0:00	Institutional Training and Education Study Section (F)[NCI-F]	9372328	3	ENGINEERING (ALL TYPES)	43207562	FL6GV84CKN57	43207562	FL6GV84CKN57	US	41.310925	-72.926428	9420201	YALE_U	NEW HAVEN	CT	BIOMED ENGR/COL ENGR/ENGR STA	65208327	UNITED STATES	N	40179	40421	398	Other Research-Related	7/1/05 0:00	5/9/14 0:00	NCI	41768	Private	TRUE	TRUE	NCI	8122508	40431	PA-09-036	4R00CA136759-03	R00
NHLBI	8775828	12/6/13 0:00	PA-11-197	7K99HL103792-02	7	K99	HL	103792	2		CARLSON DREW E	8/1/13 0:00	7/31/14 0:00	ZHL1-CSR-P(F2)	9972652	3	INTERNAL MEDICINE/MEDICINE	42250712	GM1XX56LEP58	42250712	GM1XX56LEP58	US	39.953462	-75.193983	6463801	U_OF_PENNSYLVANIA	PHILADELPHIA	PA	SCHOOLS OF MEDICINE	191046205	UNITED STATES	N	41614	41851	837	Other Research-Related	7/5/05 0:00	10/28/18 0:00	NHLBI	79925	Private	FALSE	TRUE	NHLBI	8846830	41813	PA-11-197	4R00HL103792-04	R00
NICHD	7872967	6/10/10 0:00	PA-07-297	5K99HD057522-02	5	K99	HD	57522	2		FREUND LISA S	7/1/09 0:00	6/30/13 0:00	Biobehavioral and Behavioral Sciences Study Section[CHHD-H]	8902323	7	MISCELLANEOUS	1425594	E2NYLCDML6V1	1425594	E2NYLCDML6V1	US	42.359128	-71.093339	4911501	MASSACHUSETTS_INST_OF_TECH	CAMBRIDGE	MA	ORGANIZED RESEARCH UNITS	21421029	UNITED STATES	N	40360	41455	865	Other Research-Related	7/2/05 0:00	10/7/21 0:00	NICHD	81000	Private	FALSE	FALSE	NICHD	8754821	41712	PA-07-297	4R00HD057522-03	R00
NIEHS	7496903	8/12/08 0:00	PA-06-133	5K99ES015425-02	5	K99	ES	15425	2		SHREFFLER CAROL A	9/18/07 0:00	2/28/10 0:00	ZES1-LKB-C(K9)	8632058	7	PUBLIC HEALTH & PREV MEDICINE	149617367	UNVDZNFA8R29	149617367	UNVDZNFA8R29	US	42.335306	-71.102775	3212904	HARVARD_SCH_OF_PUBLIC_HEALTH	BOSTON	MA	SCHOOLS OF PUBLIC HEALTH	21156028	UNITED STATES	N	39692	40237	113	Other Research-Related	6/30/05 0:00	5/29/46 0:00	NIEHS	90000	Private	FALSE	FALSE	NIEHS	8043236	40298	PA-09-036	4R00ES015425-03	R00
NCI	8334638	8/20/12 0:00	PA-10-063	5K99CA158581-02	5	K99	CA	158581	2		SCHMIDT MICHAEL K	9/19/11 0:00	1/31/13 0:00	Institutional Training and Education Study Section (F)[NCI-F]	10328995	7	MISCELLANEOUS	1425594	E2NYLCDML6V1	1425594	E2NYLCDML6V1	US	42.359128	-71.093339	4911501	MASSACHUSETTS_INST_OF_TECH	CAMBRIDGE	MA	ORGANIZED RESEARCH UNITS	21421029	UNITED STATES	N	41153	41305	398	Other Research-Related	7/4/05 0:00	3/28/19 0:00	NCI	116600	Private	FALSE	FALSE	NCI	8616117	41352	PA-10-063	4R00CA158581-03	R00
NIDCD	7590378	3/24/09 0:00	PA-06-133	5K99DC009459-02	5	K99	DC	9459	2		SKLARE DAN	4/1/08 0:00	5/31/10 0:00	Communication Disorders Review Committee[CDRC]	9122697	12	OTOLARYNGOLOGY	121911077	M5SZJ6VHUHN8	121911077	M5SZJ6VHUHN8	US	40.669895	-73.974354	5998304	NEW_YORK_U_SCH_OF_MED	NEW YORK	NY	SCHOOLS OF MEDICINE	10016	UNITED STATES	N	39904	40329	173	Other Research-Related	7/1/05 0:00	5/29/46 0:00	NIDCD	90000	Private	TRUE	TRUE	NIDCD	8139405	40434	PA-10-063	4R00DC009459-03	R00
NIGMS	8539046	8/13/13 0:00	PA-11-197	5K99GM099848-02	5	K99	GM	99848	2		FLICKER PAULA F	9/15/12 0:00	8/31/14 0:00	ZGM1-BRT-X(KR)	8945082	12	BIOCHEMISTRY	94878337	KMH5K9V7S518	94878337	KMH5K9V7S518	US	37.767442	-122.413937	577508	U_OF_CALIFORNIA_SAN_FRANCISCO	SAN FRANCISCO	CA	SCHOOLS OF MEDICINE	941432510	UNITED STATES	N	41518	41882	859	Other Research-Related	7/5/05 0:00	9/19/43 0:00	NIGMS	89017	public	FALSE	FALSE	NIGMS	9011088	42059	PA-11-197	4R00GM099848-03	R00
NEI	10250489	8/31/21	PA-19-130	5K99EY031795-02	5	K99	EY	31795	2		AGARWAL NEERAJ	9/30/20	8/31/22	ZEY1-VSN(03)	16072340	49	UnavaiLABle	78731668	NNJ6BMBTFGN5	78731668	NNJ6BMBTFGN5	US	32.8863	-117.243929	7210001	SALK_INST_FOR_BIOLOGICAL_STUDIES	La Jolla	CA	Research Institutes	920371002	UNITED STATES	N	9/1/21	8/31/22	867	Other Research-Related	7/13/05 0:00	3/4/01 0:00	NEI	110002	Private	FALSE	FALSE	NEI	10661306	8/29/22	PA-19-130	4R00EY031795-03	R00
NIDCD	7740801	11/6/09 0:00	PA-07-297	5K99DC009839-02	5	K99	DC	9839	2		SKLARE DAN	12/1/08 0:00	11/30/10 0:00	Communication Disorders Review Committee[CDRC]	9365345	13	NEUROSCIENCES	621889815	QHF5ZZ114M72	621889815	QHF5ZZ114M72	US	40.8415	-73.9414	1833205	COLUMBIA_U_HEALTH_SCI	NEW YORK	NY	SCHOOLS OF MEDICINE	100323725	UNITED STATES	N	40148	40512	173	Other Research-Related	7/2/05 0:00	5/29/46 0:00	NIDCD	90000	Private	TRUE	FALSE	NIDCD	8508487	41117	PA-11-197	4R00DC009839-03	R00
NIDDK	8507227	5/13/13 0:00	PA-11-197	5K99DK093711-02	5	K99	DK	93711	2		RANKIN TRACY L	7/15/12 0:00	6/30/14 0:00	Kidney Urologic and Hematologic Diseases D Study Section[DDK-D]	10218218	3	ORTHOPEDICS	43207562	FL6GV84CKN57	43207562	FL6GV84CKN57	US	41.310925	-72.926428	9420201	YALE_U	NEW HAVEN	CT	SCHOOLS OF MEDICINE	65208327	UNITED STATES	N	41395	41820	847	Other Research-Related	7/5/05 0:00	5/29/46 0:00	NIDDK	90000	Private	FALSE	TRUE	NIDDK	8844133	41866	PA-11-197	4R00DK093711-03	R00
NIDCD	7657270	6/19/09 0:00	PA-06-133	5K99DC009635-02	5	K99	DC	9635	2		SKLARE DAN	7/9/08 0:00	6/30/10 0:00	Communication Disorders Review Committee[CDRC]	6292740	12	OTOLARYNGOLOGY	94878337	KMH5K9V7S518	94878337	KMH5K9V7S518	US	37.767442	-122.413937	577508	U_OF_CALIFORNIA_SAN_FRANCISCO	SAN FRANCISCO	CA	SCHOOLS OF MEDICINE	941432510	UNITED STATES	N	39995	40359	173	Other Research-Related	7/1/05 0:00	8/1/65 0:00	NIDCD	60480	public	TRUE	FALSE	NIDCD	8043964	40344	PA-06-133	4R00DC009635-03	R00
NIMH	8547839	9/10/13 0:00	PA-11-197	5K99MH099243-02	5	K99	MH	99243	2		DESMOND NANCY L	9/20/12 0:00	10/31/14 0:00	ZMH1-ERB-L(06)	6730160	18	PSYCHIATRY	9214214	HJD6G4D6TJY5	9214214	HJD6G4D6TJY5	US	37.426852	-122.17047	8046501	STANFORD_U	STANFORD	CA	SCHOOLS OF MEDICINE	943052004	UNITED STATES	N	41518	41943	242	Other Research-Related	7/5/05 0:00	3/31/40 0:00	NIMH	87750	Private	FALSE	FALSE	NIMH	9034261	42139	PA-11-197	4R00MH099243-03	R00
NINDS	9513069	7/5/18 0:00	PA-16-193	5K99NS102520-02	5	K99	NS	102520	2		CHEN DAOFEN	7/1/17 0:00	12/31/19 0:00	NST-2 Study Section [NST-2]	11895843	23	OTHER BASIC SCIENCES	872612445	G56PUALJ3KT5	872612445	CCV3WG2JG248; D4H1NV4APKP3; ELS2M3C6V2S5; EQA8NBEN9WD5; FFAZGE9NH3M8; G56PUALJ3KT5; K6JRCJJXFET1; M8FBSLHASMT3; P4LRVQT1H4K5; PJUVN8AT5416; RT1JPM9UMGM5; ZBMGUAZYFGC4; ZMP8BDLJTUW9	US	42.438	-76.4625	1514802	CORNELL_U	ITHACA	NY	SCHOOLS OF ARTS AND SCIENCES	148502820	UNITED STATES	N	43282	43830	853	Other Research-Related	7/10/05 0:00	7/31/58 0:00	NINDS	94446	Private	FALSE	FALSE	NINDS	10190359	44070	PA-16-193	4R00NS102520-03	R00
NHLBI	8894584	7/21/15 0:00	PA-11-197	5K99HL121287-02	5	K99	HL	121287	2		REID DIANE M	8/1/14 0:00	12/31/16 0:00	ZHL1-CSR-P(M1)	10543864	7	GENETICS	1910777	FTMTDMBR29C7	1910777	FTMTDMBR29C7	US	39.325256	-76.605131	4134401	JOHNS_HOPKINS_U	BALTIMORE	MD	SCHOOLS OF MEDICINE	212182680	UNITED STATES	N	42217	42735	837	Other Research-Related	7/7/05 0:00	2/10/12 0:00	NHLBI	113997	Private	TRUE	TRUE	NHLBI	9416186	42793	PA-11-197	4R00HL121287-03	R00
NICHD	8325578	8/8/12 0:00	PA-10-063	5K99HD069533-02	5	K99	HD	69533	2		JAVOIS LORETTE CLAIRE	9/1/11 0:00	10/31/12 0:00	Developmental Biology Study Section[CHHD-C]	6431500	7	GENETICS	47006379	JDLVAVGYJQ21	47006379	JDLVAVGYJQ21	US	42.335672	-71.104237	3212902	HARVARD_MED_SCH	BOSTON	MA	SCHOOLS OF MEDICINE	21201616	UNITED STATES	N	41153	41213	865	Other Research-Related	7/4/05 0:00	8/14/39 0:00	NICHD	87520	Private	FALSE	FALSE	NICHD	8574158	41309	PA-10-063	4R00HD069533-03	R00
NIBIB	9721602	3/11/19 0:00	PA-18-398	1K99EB027723-01	1	K99	EB	27723	1		RAMPULLA DAVID	4/1/19 0:00	3/31/20 0:00	ZEB1-OSR-E(J1)S	14528727	27	NONE	9584210	U2JMKHNS5TG4	9584210	U2JMKHNS5TG4	US	34.134332	-118.12652	1073501	CALIFORNIA_INST_OF_TECH	PASADENA	CA	SCHOOLS OF ARTS AND SCIENCES	911250001	UNITED STATES	N	43556	43921	286	Other Research-Related	7/11/05 0:00	11/25/46 0:00	NIBIB	90180	Private	FALSE	FALSE	NIBIB	10115864	43931	PA-18-398	4R00EB027723-02	R00
NIAID	9996523	44025	PA-18-398	5K99AI138860-02	5	K99	AI	138860	2		CONLEY TONY J	43693	44058	Acquired Immunodeficiency Syndrome Research Study Section[AIDS]	12645073	18	UnavaiLABle	148230662	MGUCX773RNJ8	148230662	MGUCX773RNJ8	US	26.885174	-80.11392	10005569	SCRIPPS_FLORIDA	JUPITER	FL	Research Institutes	334585284	UNITED STATES	N	44044	44058	855	Other Research-Related	2020	35573	NIAID	35573	Private	FALSE	FALSE	NIAID	10221805	44048	PA-18-398	4R00AI138860-03	R00
NIEHS	9454478	2/27/18 0:00	PA-16-077	5K99ES026648-02	5	K99	ES	26648	2		BOYLES ABEE	4/1/17 0:00	12/31/18 0:00	ZES1-LWJ-J(KS)	10854492	7	NUTRITION	149617367	UNVDZNFA8R29	149617367	UNVDZNFA8R29	US	42.335306	-71.102775	3212904	HARVARD_SCH_OF_PUBLIC_HEALTH	BOSTON	MA	SCHOOLS OF PUBLIC HEALTH	21156028	UNITED STATES	N	43191	43465	113	Other Research-Related	7/10/05 0:00	2/16/36 0:00	NIEHS	122769	Private	FALSE	FALSE	NIEHS	9828798	43503	PA-16-077	4R00ES026648-03	R00
NINDS	10207808	7/12/21	PA-19-130	5K99NS112458-02	5	K99	NS	112458	2		MCGAVERN LINDA	7/15/20	12/31/21	NST-2 Study Section [NST-2]	11468941	18	NEUROLOGY	9214214	HJD6G4D6TJY5	9214214	HJD6G4D6TJY5	US	37.426852	-122.17047	8046501	STANFORD_U	STANFORD	CA	SCHOOLS OF MEDICINE	943052004	UNITED STATES	N	7/1/21	12/31/21	853	Other Research-Related	7/13/05 0:00	10/18/34 0:00	NINDS	122283	Private	TRUE	FALSE	NINDS	10529475	12/31/21	PA-19-130	4R00NS112458-03	R00
NIA	9542158	43249	PA-16-193	5K99AG054573-02	5	K99	AG	54573	2		MILLER MARILYN	42962	43799	Basic Neuroscience of Aging Study Section[NIA-N]	12255460	8	UnavaiLABle	73130411	FLJ7DQKLL226	73130411	FLJ7DQKLL226	US	42.363198	-71.068772	4907701	MASSACHUSETTS_GENERAL_HOSP	BOSTON	MA	Independent Hospitals	21142621	UNITED STATES	N	43252	43799	866	Other Research-Related	2018	137160	NIA	137160	Private	TRUE	TRUE	NIA	10058453	43811	PA-16-193	4R00AG054573-03	R00
NIAAA	10230900	8/27/20 0:00	PA-18-591	3K99AA025677-02S1	3	K99	AA	25677	2	S	MATOCHIK JOHN A	9/15/18 0:00	1/31/21 0:00		9748944	18	PSYCHIATRY	9214214	HJD6G4D6TJY5	9214214	HJD6G4D6TJY5	US	37.426852	-122.17047	8046501	STANFORD_U	STANFORD	CA	SCHOOLS OF MEDICINE	943052004	UNITED STATES	N	44075	44227	273	Other Research-Related	7/12/05 0:00	1/20/22 0:00	NIAAA	81105	Private	TRUE	TRUE	NIAAA	10373277	##########	PA-16-193	4R00AA025677-03	R00
NCI	8791025	2/6/15 0:00	PA-11-197	5K99CA181352-02	5	K99	CA	181352	2		SCHMIDT MICHAEL K	2/1/14 0:00	9/24/15 0:00	Transition to Independence Study Section (I)[NCI-I]	10163230	7	GENETICS	1910777	FTMTDMBR29C7	1910777	FTMTDMBR29C7	US	39.325256	-76.605131	4134401	JOHNS_HOPKINS_U	BALTIMORE	MD	SCHOOLS OF MEDICINE	212182680	UNITED STATES	N	42036	42271	393	Other Research-Related	7/7/05 0:00	1/4/48 0:00	NCI	90585	Private	FALSE	TRUE	NCI	9148271	42273	PA-11-197	4R00CA181352-03	R00
NIGMS	10111534	2/22/21	PA-19-130	5K99GM135529-02	5	K99	GM	135529	2		BARSKI OLEG	3/1/20	2/28/22	ZGM1-TWD-7(KR)	14339520	12	PHARMACOLOGY	94878337	KMH5K9V7S518	94878337	KMH5K9V7S518	US	37.767442	-122.413937	577508	U_OF_CALIFORNIA_SAN_FRANCISCO	SAN FRANCISCO	CA	SCHOOLS OF PHARMACY	941432510	UNITED STATES	N	3/1/21	2/28/22	859	Other Research-Related	7/13/05 0:00	2/12/66 0:00	NIGMS	97199	public	FALSE	FALSE	NIGMS	10609154	7/22/22	PA-19-130	4R00GM135529-03	R00
NHGRI	10122971	4/9/21	PA-19-130	5K99HG010904-02	5	K99	HG	10904	2		VOLPI SIMONA	3/6/20	2/28/22	Genome Research Study Section[GNOM-G]	14655663	5	UnavaiLABle	79917897	GYLUH9UXHDX5	79917897	GYLUH9UXHDX5	US	36.143784	-86.800995	10040927	VANDERBILT_U_MED_CTR	NASHVILLE	TN	Independent Hospitals	372320011	UNITED STATES	N	3/1/21	2/28/22	172	Other Research-Related	7/13/05 0:00	7/15/05 0:00	NHGRI	111596	Private	TRUE	TRUE	NHGRI	10583654	3/31/22	PA-19-130	4R00HG010904-03	R00
NHLBI	10071203	12/7/20	PA-19-130	5K99HL150234-02	5	K99	HL	150234	2		HUANG LI-SHIN	12/15/19	5/31/22	NHLBI Mentored Transition to Independence Study Section[MTI(OA)]	11196865	3	INTERNAL MEDICINE/MEDICINE	43207562	FL6GV84CKN57	43207562	FL6GV84CKN57	US	41.310925	-72.926428	9420201	YALE_U	NEW HAVEN	CT	SCHOOLS OF MEDICINE	65208327	UNITED STATES	N	12/1/20	5/31/22	837	Other Research-Related	7/13/05 0:00	5/28/93 0:00	NHLBI	107166	Private	TRUE	FALSE	NHLBI	10556834	7/8/22	PA-19-130	4R00HL150234-03	R00
NIMH	8019618	1/5/11 0:00	PA-09-036	5K99MH086049-02	5	K99	MH	86049	2		DESMOND NANCY L	2/2/10 0:00	1/31/12 0:00	ZMH1-ERB-L(07)	9525443	7	PSYCHIATRY	1910777	FTMTDMBR29C7	1910777	FTMTDMBR29C7	US	39.325256	-76.605131	4134401	JOHNS_HOPKINS_U	BALTIMORE	MD	SCHOOLS OF MEDICINE	212182680	UNITED STATES	N	40575	40939	281	Other Research-Related	7/3/05 0:00	1/3/17 0:00	NIMH	152310	Private	TRUE	TRUE	NIMH	8441986	41127		4R00MH086049-03	R00
NICHD	8730709	8/25/14 0:00	PA-11-197	5K99HD076444-02	5	K99	HD	76444	2		PARISI MELISSA	9/9/13 0:00	3/31/15 0:00	Developmental Biology Study Section[CHHD-C]	9166011	12	UnavaiLABle	64931884	KUKXRCZ6NZC2	64931884	KUKXRCZ6NZC2	US	40.764045	-73.956024	5079202	SLOAN-KETTERING_INST_CAN_RES	NEW YORK	NY	Research Institutes	100656007	UNITED STATES	N	41883	42094	865	Other Research-Related	7/6/05 0:00	10/30/62 0:00	NICHD	95998	Private	FALSE	FALSE	NICHD	8993019	42074	PA-11-197	4R00HD076444-03	R00
NIDDK	9934191	5/15/20 0:00	PA-18-398	5K99DK119413-02	5	K99	DK	119413	2		RANKIN TRACY L	6/1/19 0:00	5/31/21 0:00	Kidney Urologic and Hematologic Diseases D Study Section[DDK-D]	12638554	7	INTERNAL MEDICINE/MEDICINE	63690705	YND4PLMC9AN7	63690705	YND4PLMC9AN7	US	33.50591	-86.799772	1288803	U_OF_ALABAMA_AT_BIRMINGHAM	BIRMINGHAM	AL	SCHOOLS OF MEDICINE	352940001	UNITED STATES	N	43983	44347	847	Other Research-Related	7/12/05 0:00	5/29/46 0:00	NIDDK	90000	public	FALSE	FALSE	NIDDK	10469099	##########	PA-18-398	4R00DK119413-03	R00
NIBIB	9336924	42978	PA-15-083	5K99EB021320-02	5	K99	EB	21320	2		WANG SHUMIN	42614	43281	ZEB1-OSR-E(M1)S	12541041	8	UnavaiLABle	73130411	FLJ7DQKLL226	73130411	FLJ7DQKLL226	US	42.363198	-71.068772	4907701	MASSACHUSETTS_GENERAL_HOSP	BOSTON	MA	Independent Hospitals	21142621	UNITED STATES	N	42979	43281	286	Other Research-Related	2017	95040	NIBIB	95040	Private	FALSE	FALSE	NIBIB	9742704	43360	PA-15-083	4R00EB021320-02	R00
NCI	7739205	9/1/09 0:00	PA-07-297	1K99CA137860-01A1	1	K99	CA	137860	1	A	SCHMIDT MICHAEL K	9/1/09 0:00	2/28/11 0:00	Institutional Training and Education Study Section (F)[NCI-F]	9354245	4	GENETICS	44387793	TP7EK8DZV6N5	44387793	TP7EK8DZV6N5	US	36.007766	-78.926475	2221101	DUKE_U	DURHAM	NC	SCHOOLS OF MEDICINE	277054673	UNITED STATES	N	40057	40602	398	Other Research-Related	7/1/05 0:00	5/16/70 0:00	NCI	98753	Private	FALSE	FALSE	NCI	8198179	40547	PA-10-063	4R00CA137860-02	R00
NHLBI	8752032	7/18/14 0:00	PA-11-197	1K99HL123623-01	1	K99	HL	123623	1		WANG WAYNE C	8/1/14 0:00	7/31/15 0:00	ZHL1-CSR-P(M1)	10604236	3	PHYSIOLOGY	42250712	GM1XX56LEP58	42250712	GM1XX56LEP58	US	39.953462	-75.193983	6463801	U_OF_PENNSYLVANIA	PHILADELPHIA	PA	SCHOOLS OF MEDICINE	191046205	UNITED STATES	N	41852	42216	837	Other Research-Related	7/6/05 0:00	7/2/45 0:00	NHLBI	89669	Private	FALSE	FALSE	NHLBI	9087376	42200	PA-11-197	4R00HL123623-02	R00
NCCIH	7692959	6/29/09 0:00	PA-07-297	5K99AT004945-02	5	K99	AT	4945	2		GLOWA JOHN R	9/30/08 0:00	6/30/10 0:00	ZAT1-LD(25)	7301925	4	PSYCHIATRY	44387793	TP7EK8DZV6N5	44387793	TP7EK8DZV6N5	US	36.007766	-78.926475	2221101	DUKE_U	DURHAM	NC	SCHOOLS OF MEDICINE	277054673	UNITED STATES	N	39995	40359	213	Other Research-Related	7/1/05 0:00	6/6/43 0:00	NCCIH	88912	Private	TRUE	TRUE	NCCIH	8141593	40438	PA-07-297	4R00AT004945-03	R00
NIA	9008012	42396	PA-14-042	5K99AG049056-02	5	K99	AG	49056	2		MILLER MARILYN	42050	42766	Basic Neuroscience of Aging Study Section[NIA-N]	12085130	8	UnavaiLABle	73130411	FLJ7DQKLL226	73130411	FLJ7DQKLL226	US	42.363198	-71.068772	4907701	MASSACHUSETTS_GENERAL_HOSP	BOSTON	MA	Independent Hospitals	21142621	UNITED STATES	N	42401	42766	866	Other Research-Related	2016	137160	NIA	137160	Private	TRUE	TRUE	NIA	9419489	42789	PA-14-042	4R00AG049056-03	R00
NHGRI	9061766	4/14/16 0:00	PA-14-042	5K99HG007940-02	5	K99	HG	7940	2		WELLINGTON CHRISTOPHER	5/1/15 0:00	4/30/17 0:00	Genome Research Study Section[GNOM-G]	11581475	1	GENETICS	68552207	L6NFUM28LQM5	68552207	L6NFUM28LQM5	US	38.664368	-90.323797	9083901	WASHINGTON_U	SAINT LOUIS	MO	SCHOOLS OF MEDICINE	631304862	UNITED STATES	N	42491	42855	172	Other Research-Related	7/8/05 0:00	7/1/61 0:00	NHGRI	132036	Private	TRUE	TRUE	NHGRI	9443700	42856	PA-14-042	4R00HG007940-03	R00
NHLBI	8296613	6/27/12 0:00	PA-10-063	5K99HL109212-02	5	K99	HL	109212	2		CARLSON DREW E	7/15/11 0:00	6/30/14 0:00	ZHL1-CSR-Z(M1)	10649219	18	ANESTHESIOLOGY	9214214	HJD6G4D6TJY5	9214214	HJD6G4D6TJY5	US	37.426852	-122.17047	8046501	STANFORD_U	STANFORD	CA	SCHOOLS OF MEDICINE	943052004	UNITED STATES	N	41091	41820	837	Other Research-Related	7/4/05 0:00	8/29/64 0:00	NHLBI	133191	Private	TRUE	TRUE	NHLBI	8846820	41815	PA-10-063	4R00HL109212-03	R00
NIA	8666701	5/15/14 0:00	PA-11-197	5K99AG042483-02	5	K99	AG	42483	2		WISE BRADLEY C	6/1/13 0:00	5/31/15 0:00	Basic Neuroscience of Aging Study Section[NIA-N]	10382657	13	NEUROLOGY	621889815	QHF5ZZ114M72	621889815	QHF5ZZ114M72	US	40.8415	-73.9414	1833205	COLUMBIA_U_HEALTH_SCI	NEW YORK	NY	SCHOOLS OF MEDICINE	100323725	UNITED STATES	N	41791	42155	866	Other Research-Related	7/6/05 0:00	6/11/76 0:00	NIA	100971	Private	TRUE	TRUE	NIA	9107608	42247	PA-11-197	4R00AG042483-03	R00
NINDS	8930215	42141	PA-14-042	5K99NS089943-02	5	K99	NS	89943	2		RIDDLE ROBERT D	41912	42886	NST-2 Study Section [NST-2]	10868432	12	PEDIATRICS	71037113	LHGDNJMZ64Y1	71037113	LHGDNJMZ64Y1	US	40.763746	-73.955386	7056601	ROCKEFELLER_U	NEW YORK	NY	GRADUATE SCHOOLS	100656399	UNITED STATES	N	42156	42886	853	Other Research-Related	2015	96660	NINDS	96660	Private	FALSE	FALSE	NINDS	9487536	42933	PA-14-042	4R00NS089943-03	R00
NIBIB	9127216	6/30/16 0:00	PA-14-042	5K99EB019482-02	5	K99	EB	19482	2		ERIM ZEYNEP	8/17/15 0:00	6/30/17 0:00	ZEB1-OSR-C(M2)S	11817351	8	UnavaiLABle	73130411	FLJ7DQKLL226	73130411	FLJ7DQKLL226	US	42.363198	-71.068772	4907701	MASSACHUSETTS_GENERAL_HOSP	BOSTON	MA	Independent Hospitals	21142621	UNITED STATES	N	42552	42916	286	Other Research-Related	7/8/05 0:00	9/1/58 0:00	NIBIB	94478	Private	TRUE	TRUE	NIBIB	9475982	42881	PA-14-042	4R00EB019482-03	R00
NHGRI	10229615	8/6/21	PA-19-130	5K99HG010909-02	5	K99	HG	10909	2		SOFIA HEIDI J	8/5/20	1/2/22	Genome Research Study Section[GNOM-G]	14192253	3	BIOCHEMISTRY	43207562	FL6GV84CKN57	43207562	FL6GV84CKN57	US	41.310925	-72.926428	9420201	YALE_U	NEW HAVEN	CT	SCHOOLS OF MEDICINE	65208327	UNITED STATES	N	8/1/21	1/2/22	172	Other Research-Related	7/13/05 0:00	6/4/37 0:00	NHGRI	13670	Private	FALSE	FALSE	NHGRI	10540473	5/2/22	PA-19-130	4R00HG010909-03	R00
NHLBI	8473272	41296	PA-10-063	5K99HL111206-02	5	K99	HL	111206	2		CARLSON DREW E	41061	41698	ZHL1-CSR-P(O2)	10098932	13	INTERNAL MEDICINE/MEDICINE	621889815	QHF5ZZ114M72	621889815	QHF5ZZ114M72	US	40.8415	-73.9414	1833205	COLUMBIA_U_HEALTH_SCI	NEW YORK	NY	SCHOOLS OF MEDICINE	100323725	UNITED STATES	N	41334	41698	837	Other Research-Related	2013	133839	NHLBI	133839	Private	FALSE	TRUE	NHLBI	8803861	41738	PA-10-063	4R00HL111206-03	R00
NICHD	9977012	3/11/20 0:00	PA-19-130	1K99HD099387-01A1	1	K99	HD	99387	1	A	OCTOBER TESSIE	4/1/20 0:00	3/31/21 0:00	Pediatrics Study Section[CHHD-A]	12323539	18	PEDIATRICS	9214214	HJD6G4D6TJY5	9214214	HJD6G4D6TJY5	US	37.426852	-122.17047	8046501	STANFORD_U	STANFORD	CA	SCHOOLS OF MEDICINE	943052004	UNITED STATES	N	43922	44286	865	Other Research-Related	7/12/05 0:00	6/12/60 0:00	NICHD	131652	Private	TRUE	TRUE	NICHD	10371311	##########	PA-19-130	4R00HD099387-02	R00
NINDS	8424238	3/22/13 0:00	PA-11-197	5K99NS078115-02	5	K99	NS	78115	2		GNADT JAMES W	4/1/12 0:00	3/31/14 0:00	NST-2 Study Section [NST-2]	8711227	8	UnavaiLABle	73130411	FLJ7DQKLL226	73130411	FLJ7DQKLL226	US	42.363198	-71.068772	4907701	MASSACHUSETTS_GENERAL_HOSP	BOSTON	MA	Independent Hospitals	21142621	UNITED STATES	N	41365	41729	853	Other Research-Related	7/5/05 0:00	3/21/48 0:00	NINDS	90662	Private	FALSE	FALSE	NINDS	8892350	41845	PA-11-197	4R00NS078115-03	R00
NIEHS	8133499	8/23/11 0:00	PA-09-036	5K99ES018890-02	5	K99	ES	18890	2		SHREFFLER CAROL A	9/1/10 0:00	2/29/12 0:00	Environmental Health Sciences Review Committee[EHS(01)]	9939675	13	PUBLIC HEALTH & PREV MEDICINE	621889815	QHF5ZZ114M72	621889815	QHF5ZZ114M72	US	40.8415	-73.9414	1833205	COLUMBIA_U_HEALTH_SCI	NEW YORK	NY	SCHOOLS OF PUBLIC HEALTH	100323725	UNITED STATES	N	40787	40968	113	Other Research-Related	7/3/05 0:00	6/16/27 0:00	NIEHS	46554	Private	TRUE	TRUE	NIEHS	8434995	41037	PA-10-063	4R00ES018890-03	R00
NHLBI	9681489	4/12/19 0:00	PA-16-193	5K99HL141678-02	5	K99	HL	141678	2		REINECK LORA A	4/15/18 0:00	12/31/19 0:00	NHLBI Mentored Transition to Independence Study Section[MTI(JA)]	11290847	3	BIOSTATISTICS & OTHER MATH SCI	42250712	GM1XX56LEP58	42250712	GM1XX56LEP58	US	39.953462	-75.193983	6463801	U_OF_PENNSYLVANIA	PHILADELPHIA	PA	SCHOOLS OF MEDICINE	191046205	UNITED STATES	N	43556	43830	838	Other Research-Related	7/11/05 0:00	9/21/95 0:00	NHLBI	108012	Private	TRUE	TRUE	NHLBI	9967226	43798	PA-16-193	4R00HL141678-03	R00
NIDCR	9441748	43137	PA-16-193	5K99DE026810-02	5	K99	DE	26810	2		FRIEDEN LESLIE A	42826	43921	NIDCR Special Grants Review Committee[DSR]	12295234	12	ANESTHESIOLOGY	73133571	GNJ7BBP73WE9	73133571	GNJ7BBP73WE9	US	42.275494	-83.743038	1506502	U_OF_MICHIGAN_AT_ANN_ARBOR	ANN ARBOR	MI	SCHOOLS OF MEDICINE	481091276	UNITED STATES	N	43191	43921	121	Other Research-Related	2018	117891	NIDCR	117891	Public	TRUE	FALSE	NIDCR	10101757	44020	PA-16-193	4R00DE026810-03	R00
NCRR	7320199	8/2/07 0:00	PA-06-133	1K99RR024107-01A1	1	K99	RR	24107	1	A	SHEELEY DOUGLAS	8/2/07 0:00	7/31/08 0:00	ZGM1-BRT-9(KR)	2219325	7	BIOCHEMISTRY	605799469	HD1WMN6945W6	605799469	HD1WMN6945W6	US	47.660307	-122.315168	9087701	U_OF_WASHINGTON	SEATTLE	WA	SCHOOLS OF MEDICINE	981959472	UNITED STATES	N	39296	39660	389	Other Research-Related	6/29/05 0:00	5/8/27 0:00	NCRR	83039	Public	FALSE	FALSE	NCRR	7659211	39703	PA-06-133	4R00RR024107-02	R00
NIDDK	8538967	8/16/13 0:00	PA-11-197	5K99DK094980-02	5	K99	DK	94980	2		HAFT CAROL R	9/1/12 0:00	9/4/13 0:00	Diabetes Endocrinology and Metabolic Diseases B Study Section[DDK-B]	10896029	30	INTERNAL MEDICINE/MEDICINE	800771545	YZJ6DKPM4W63	800771545	YZJ6DKPM4W63	US	32.811963	-96.837534	578404	UT_SOUTHWESTERN_MED_CTR	DALLAS	TX	SCHOOLS OF MEDICINE	753909105	UNITED STATES	N	41518	41521	847	Other Research-Related	7/5/05 0:00	5/29/46 0:00	NIDDK	90000	Public	FALSE	FALSE	NIDDK	8774357	41631	PA-11-197	4R00DK094980-03	R00
NIDDK	8115793	7/22/11 0:00	PA-09-036	5K99DK085142-02	5	K99	DK	85142	2		MARGOLIS RONALD N	7/20/10 0:00	8/31/11 0:00	Diabetes Endocrinology and Metabolic Diseases B Study Section[DDK-B]	9585745	7	PEDIATRICS	1910777	FTMTDMBR29C7	1910777	FTMTDMBR29C7	US	39.325256	-76.605131	4134401	JOHNS_HOPKINS_U	BALTIMORE	MD	SCHOOLS OF MEDICINE	212182680	UNITED STATES	N	40725	40786	847	Other Research-Related	7/3/05 0:00	5/29/46 0:00	NIDDK	90000	Private	TRUE	TRUE	NIDDK	8310339	40791		4R00DK085142-03	R00
NIAID	10204982	6/9/21	PAR-17-329	5K99AI143927-02	5	K99	AI	143927	2		GONDRE-LEWIS TIMOTHY A	7/1/20	6/30/22	Allergy Immunology and Transplantation Research Committee[AITC]	14200711	4	INTERNAL MEDICINE/MEDICINE	44387793	TP7EK8DZV6N5	44387793	TP7EK8DZV6N5	US	36.007766	-78.926475	2221101	DUKE_U	DURHAM	NC	SCHOOLS OF MEDICINE	277054673	UNITED STATES	N	7/1/21	6/30/22	855	Other Research-Related	7/13/05 0:00	11/17/36 0:00	NIAID	123044	Private	TRUE	TRUE	NIAID	10662620	9/7/22	PAR-17-329	4R00AI143927-03	R00
NHLBI	7938070	8/6/10 0:00	PA-07-297	5K99HL096897-02	5	K99	HL	96897	2		ROTHGEB ANN E	9/25/09 0:00	1/31/12 0:00	ZHL1-CSR-Z(M3)	8395827	7	MICROBIOLOGY/IMMUN/VIROLOGY	188435911	Z9CRZKD42ZT1	188435911	Z9CRZKD42ZT1	US	39.292248	-76.625629	820104	U_OF_MARYLAND_BALTIMORE	BALTIMORE	MD	SCHOOLS OF MEDICINE	212011508	UNITED STATES	N	40391	40939	837	Other Research-Related	7/2/05 0:00	11/8/90 0:00	NHLBI	106234	public	FALSE	FALSE	NHLBI	8307122	40799		4R00HL096897-03	R00
NHLBI	7588734	2/27/09 0:00	PA-07-297	5K99HL092226-02	5	K99	HL	92226	2		COLOMBINI-HATCH SANDRA	4/1/08 0:00	3/31/10 0:00	ZHL1-CSR-S(F1)	9110825	5	PHYSIOLOGY	66469933	S352L5PJLMP8	66469933	S352L5PJLMP8	US	33.791247	-84.3249	2384501	EMORY_U	ATLANTA	GA	SCHOOLS OF MEDICINE	303221007	UNITED STATES	N	39904	40268	838	Other Research-Related	7/1/05 0:00	12/11/43 0:00	NHLBI	89100	Private	TRUE	TRUE	NHLBI	8052236	40414		4R00HL092226-03	R00
NINDS	8930213	9/2/15 0:00	PA-14-042	5K99NS089800-02	5	K99	NS	89800	2		TALLEY EDMUND M	9/30/14 0:00	8/31/16 0:00	NST-2 Study Section [NST-2]	9177946	5	BIOLOGY	616845814	MXLZGAMFEKN5	616845814	MXLZGAMFEKN5	US	42.366381	-71.254515	925301	BRANDEIS_U	WALTHAM	MA	SCHOOLS OF ARTS AND SCIENCES	24532728	UNITED STATES	N	42248	42613	853	Other Research-Related	7/7/05 0:00	8/11/20 0:00	NINDS	80578	Private	TRUE	FALSE	NINDS	9538322	42975	PA-14-042	4R00NS089800-03	R00
NIMH	7477884	6/20/08 0:00	PA-06-133	5K99MH081058-02	5	K99	MH	81058	2		DESMOND NANCY L	7/30/07 0:00	6/30/09 0:00	ZMH1-ERB-H(04)	8737737	12	PHARMACOLOGY	60217502	YNT8TCJH8FQ8	60217502	YNT8TCJH8FQ8	US	40.7607	-73.9603	1514803	WEILL_MED_COLL_OF_CORNELL_U	NEW YORK	NY	SCHOOLS OF MEDICINE	100654805	UNITED STATES	N	39630	39994	242	Other Research-Related	6/30/05 0:00	4/9/19 0:00	NIMH	80088	Private	FALSE	FALSE	NIMH	7884964	40078	PA-06-133	4R00MH081058-03	R00
NIEHS	7822803	4/27/10 0:00	PA-07-297	5K99ES017051-02	5	K99	ES	17051	2		SHREFFLER CAROL A	5/1/09 0:00	4/30/11 0:00	ZES1-JAB-C(KR)	9369814	13	PUBLIC HEALTH & PREV MEDICINE	621889815	QHF5ZZ114M72	621889815	QHF5ZZ114M72	US	40.8415	-73.9414	1833205	COLUMBIA_U_HEALTH_SCI	NEW YORK	NY	SCHOOLS OF PUBLIC HEALTH	100323725	UNITED STATES	N	40299	40663	113	Other Research-Related	7/2/05 0:00	6/9/80 0:00	NIEHS	65906	Private	TRUE	TRUE	NIEHS	8193401	40539	PA-07-297	4R00ES017051-03	R00
NIDDK	7920588	9/21/09 0:00	PA-06-133	3K99DK077731-02S1	3	K99	DK	77731	2	S	RANKIN TRACY L	9/30/09 0:00	9/29/11 0:00	Kidney Urologic and Hematologic Diseases D Study Section[DDK-D]	8659915	7	UnavaiLABle	30811269	QN6MS4VN7BD1	30811269	QN6MS4VN7BD1	US	42.336107	-71.107481	1080401	BRIGHAM_&_WOMENS_HOSP	BOSTON	MA	Independent Hospitals	21156110	UNITED STATES	N	40086	40815	701	Other Research-Related	7/1/05 0:00	11/4/47 0:00	NIDDK	54000	Private	TRUE	TRUE	NIDDK	8090638	40417	PA-06-133	4R00DK077731-03	R00
NHGRI	9405590	12/1/17 0:00	PA-16-077	5K99HG009007-02	5	K99	HG	9007	2		PILLAI AJAY	12/23/16 0:00	1/31/18 0:00	Genome Research Study Section[GNOM-G]	10638120	7	UnavaiLABle	76580745	DPMGH9MG1X67	76580745	DPMGH9MG1X67	US	42.337593	-71.108279	1464901	DANA-FARBER_CANCER_INST	BOSTON	MA	Independent Hospitals	22155450	UNITED STATES	N	43070	43131	172	Other Research-Related	7/10/05 0:00	6/17/70 0:00	NHGRI	25736	Private	FALSE	FALSE	NHGRI	9624938	43173	PA-16-077	4R00HG009007-03	R00
NHLBI	8299478	7/16/12 0:00	PA-10-063	5K99HL105663-02	5	K99	HL	105663	2		TIGNO XENIA	7/15/11 0:00	8/31/13 0:00	ZHL1-CSR-Z(M1)	8774163	7	UnavaiLABle	30811269	QN6MS4VN7BD1	30811269	QN6MS4VN7BD1	US	42.336107	-71.107481	1080401	BRIGHAM_&_WOMENS_HOSP	BOSTON	MA	Independent Hospitals	21156110	UNITED STATES	N	41091	41517	838	Other Research-Related	7/4/05 0:00	12/16/75 0:00	NHLBI	137317	Private	TRUE	TRUE	NHLBI	8724089	41513	PA-10-063	4R00HL105663-03	R00
NHLBI	8705292	6/9/14 0:00	PA-11-197	5K99HL119559-02	5	K99	HL	119559	2		MONDORO TRACI	8/1/13 0:00	6/30/15 0:00	ZHL1-CSR-P(M2)	10494463	5	ANATOMY/CELL BIOLOGY	82359691	LN53LCFJFL45	82359691	LN53LCFJFL45	US	42.369697	-71.11193	3212901	HARVARD_U	CAMBRIDGE	MA	SCHOOLS OF ARTS AND SCIENCES	21385369	UNITED STATES	N	41821	42185	837	Other Research-Related	7/6/05 0:00	1/9/59 0:00	NHLBI	94608	Private	FALSE	FALSE	NHLBI	9050867	42230	PA-11-197	4R00HL119559-03	R00
NIA	9527721	43279	PA-16-193	5K99AG056636-02	5	K99	AG	56636	2		WISE BRADLEY C	42931	43372	Basic Neuroscience of Aging Study Section[NIA-N]	14737275	5	CHEMISTRY	82359691	LN53LCFJFL45	82359691	LN53LCFJFL45	US	42.369697	-71.11193	3212901	HARVARD_U	CAMBRIDGE	MA	SCHOOLS OF ARTS AND SCIENCES	21385369	UNITED STATES	N	43282	43372	866	Other Research-Related	2018	127683	NIA	127683	Private	FALSE	FALSE	NIA	9787623	43364	PA-16-193	4R00AG056636-03	R00
NIMH	9515654	6/18/18 0:00	PA-16-193	5K99MH111807-02	5	K99	MH	111807	2		HILL LAUREN D	7/1/17 0:00	7/31/18 0:00	ZMH1-ERB-X(04)	14082853	7	OTHER HEALTH PROFESSIONS	1910777	FTMTDMBR29C7	1910777	FTMTDMBR29C7	US	39.325256	-76.605131	4134401	JOHNS_HOPKINS_U	BALTIMORE	MD	SCHOOLS OF PUBLIC HEALTH	212182680	UNITED STATES	N	43282	43312	242	Other Research-Related	7/10/05 0:00	1/13/20 0:00	NIMH	7318	Private	FALSE	FALSE	NIMH	9750373	43335	PA-16-193	4R00MH111807-03	R00
NCI	9582798	7/11/18 0:00	PA-16-193	1K99CA230384-01	1	K99	CA	230384	1		RADAEV SERGEY	8/1/18 0:00	2/28/19 0:00	Transition to Independence Study Section (I)[NCI-I]	9619499	12	INTERNAL MEDICINE/MEDICINE	60217502	YNT8TCJH8FQ8	60217502	YNT8TCJH8FQ8	US	40.7607	-73.9603	1514803	WEILL_MED_COLL_OF_CORNELL_U	NEW YORK	NY	SCHOOLS OF MEDICINE	100654805	UNITED STATES	N	43313	43524	398	Other Research-Related	7/10/05 0:00	4/22/95 0:00	NCI	107860	Private	FALSE	FALSE	NCI	9905847	43640	PA-16-193	4R00CA230384-02	R00
NCI	8639510	3/25/14 0:00	PA-11-197	5K99CA175700-02	5	K99	CA	175700	2		SCHMIDT MICHAEL K	4/1/13 0:00	3/31/15 0:00	Transition to Independence Study Section (I)[NCI-I]	10806199	12	INTERNAL MEDICINE/MEDICINE	94878337	KMH5K9V7S518	94878337	KMH5K9V7S518	US	37.767442	-122.413937	577508	U_OF_CALIFORNIA_SAN_FRANCISCO	SAN FRANCISCO	CA	SCHOOLS OF MEDICINE	941432510	UNITED STATES	N	41730	42094	398	Other Research-Related	7/6/05 0:00	12/25/18 0:00	NCI	116507	public	FALSE	FALSE	NCI	9029509	42143	PA-11-197	4R00CA175700-03	R00
NIAMS	7451037	5/19/08 0:00	PA-06-133	5K99AR054775-02	5	K99	AR	54775	2		BAKER CARL	6/20/07 0:00	12/31/08 0:00	Arthritis and Musculoskeletal and Skin Diseases Special Grants Study Section[AMS]	8663405	12	BIOLOGY	71037113	LHGDNJMZ64Y1	71037113	LHGDNJMZ64Y1	US	40.763746	-73.955386	7056601	ROCKEFELLER_U	NEW YORK	NY	GRADUATE SCHOOLS	100656399	UNITED STATES	N	39600	39813	846	Other Research-Related	6/30/05 0:00	5/29/46 0:00	NIAMS	90000	Private	FALSE	FALSE	NIAMS	7755297	39891		4R00AR054775-03	R00
NIEHS	8327189	8/28/12 0:00	PA-10-063	5K99ES020364-02	5	K99	ES	20364	2		SHREFFLER CAROL A	9/1/11 0:00	8/31/13 0:00	ZES1-LKB-J(K9)	6997547	13	PUBLIC HEALTH & PREV MEDICINE	621889815	QHF5ZZ114M72	621889815	QHF5ZZ114M72	US	40.8415	-73.9414	1833205	COLUMBIA_U_HEALTH_SCI	NEW YORK	NY	SCHOOLS OF PUBLIC HEALTH	100323725	UNITED STATES	N	41153	41517	113	Other Research-Related	7/4/05 0:00	1/9/37 0:00	NIEHS	123097	Private	TRUE	FALSE	NIEHS	8697206	41516	PA-10-063	4R00ES020364-03	R00
NHGRI	10104023	3/26/21	PA-19-130	1K99HG011468-01	1	K99	HG	11468	1		GILCHRIST DANIEL A	3/26/21	2/28/23	Genome Research Study Section[GNOM(O1)-G]	16268255	7	BIOSTATISTICS & OTHER MATH SCI	1910777	FTMTDMBR29C7	1910777	FTMTDMBR29C7	US	39.325256	-76.605131	4134401	JOHNS_HOPKINS_U	BALTIMORE	MD	SCHOOLS OF PUBLIC HEALTH	212182680	UNITED STATES	N	3/26/21	2/28/22	172	Other Research-Related	7/13/05 0:00	5/6/17 0:00	NHGRI	115909	Private	TRUE	FALSE	NHGRI	10665219	8/8/22	PA-19-130	4R00HG011468-03	R00
NIMHD	9572414	6/22/18 0:00	PA-16-193	5K99MD011485-02	5	K99	MD	11485	2		ROSARIO ADELAIDA M	9/25/17 0:00	6/30/19 0:00	ZMD1-XLN(O1)	11824497	9	NONE	800772139	S3GMKS8ELA16	800772139	S3GMKS8ELA16	US	29.706319	-95.397195	578407	U_OF_TX_MD_ANDERSON_CAN_CTR	HOUSTON	TX	OVERALL MEDICAL	770304009	UNITED STATES	N	43282	43646	307	Other Research-Related	7/10/05 0:00	7/31/37 0:00	NIMHD	86776	Public	FALSE	FALSE	NIMHD	9808702	43662	PA-16-193	4R00MD011485-03	R00
NHLBI	8046427	3/15/11 0:00	PA-09-036	5K99HL102241-02	5	K99	HL	102241	2		LAPOSKY AARON D	4/1/10 0:00	3/31/12 0:00	ZHL1-CSR-Z(F2)	9651291	7	UnavaiLABle	30811269	QN6MS4VN7BD1	30811269	QN6MS4VN7BD1	US	42.336107	-71.107481	1080401	BRIGHAM_&_WOMENS_HOSP	BOSTON	MA	Independent Hospitals	21156110	UNITED STATES	N	40634	40999	233	Other Research-Related	7/3/05 0:00	9/29/77 0:00	NHLBI	137970	Private	TRUE	TRUE	NHLBI	8431501	41134	PA-09-164	4R00HL102241-03	R00
NIMHD	9769129	5/16/19 0:00	PA-16-193	5K99MD012811-02	5	K99	MD	12811	2		BERZON RICHARD	8/23/18 0:00	5/31/20 0:00	ZMD1-XLN(M1)	15169883	12	INTERNAL MEDICINE/MEDICINE	121911077	M5SZJ6VHUHN8	121911077	M5SZJ6VHUHN8	US	40.669895	-73.974354	5998304	NEW_YORK_U_SCH_OF_MED	NEW YORK	NY	SCHOOLS OF MEDICINE	10016	UNITED STATES	N	43617	43982	307	Other Research-Related	7/11/05 0:00	2/21/83 0:00	NIMHD	103417	Private	TRUE	TRUE	NIMHD	9993687	43972	PA-16-193	4R00MD012811-03	R00
NIGMS	9751918	8/8/19 0:00	PA-16-193	5K99GM129419-02	5	K99	GM	129419	2		BARSKI OLEG	8/1/18 0:00	8/14/19 0:00	ZGM1-TWD-8(KR)	14806276	27	NONE	9584210	U2JMKHNS5TG4	9584210	U2JMKHNS5TG4	US	34.134332	-118.12652	1073501	CALIFORNIA_INST_OF_TECH	PASADENA	CA	SCHOOLS OF ARTS AND SCIENCES	911250001	UNITED STATES	N	43678	43691	859	Other Research-Related	7/11/05 0:00	1/6/20 0:00	NIGMS	7311	Private	FALSE	FALSE	NIGMS	10044755	43804	PA-16-193	4R00GM129419-03	R00
NIA	9061557	4/30/16 0:00	PA-14-042	5K99AG047336-02	5	K99	AG	47336	2		YANG AUSTIN JYAN-YU	5/1/15 0:00	4/30/17 0:00	Basic Neuroscience of Aging Study Section[NIA-N]	10555788	8	UnavaiLABle	73130411	FLJ7DQKLL226	73130411	FLJ7DQKLL226	US	42.363198	-71.068772	4907701	MASSACHUSETTS_GENERAL_HOSP	BOSTON	MA	Independent Hospitals	21142621	UNITED STATES	N	42491	42855	866	Other Research-Related	7/8/05 0:00	3/10/73 0:00	NIA	136306	Private	TRUE	TRUE	NIA	9532416	42994	PA-14-042	4R00AG047336-03	R00
NHLBI	8471765	4/29/13 0:00	PA-10-063	5K99HL107749-02	5	K99	HL	107749	2		COOPER LAWTON S	6/1/12 0:00	4/30/14 0:00	ZHL1-CSR-P(O2)	10454691	7	PUBLIC HEALTH & PREV MEDICINE	5436803	KG76WYENL5K1	5436803	KG76WYENL5K1	US	42.050479	-87.680046	6144650	NORTHWESTERN_U	CHICAGO	IL	SCHOOLS OF MEDICINE	606114579	UNITED STATES	N	41395	41759	837	Other Research-Related	7/5/05 0:00	7/2/21 0:00	NHLBI	80903	Private	TRUE	TRUE	NHLBI	8843572	41838	PA-10-063	4R00HL107749-03	R00
NIA	10090547	2/17/21	PA-19-130	5K99AG062723-02	5	K99	AG	62723	2		LUO YUAN	2/1/20	1/31/22	Basic Neuroscience of Aging Study Section[NIA-N]	14894922	1	PSYCHIATRY	68552207	L6NFUM28LQM5	68552207	L6NFUM28LQM5	US	38.664368	-90.323797	9083901	WASHINGTON_U	SAINT LOUIS	MO	SCHOOLS OF MEDICINE	631304862	UNITED STATES	N	2/1/21	1/31/22	866	Other Research-Related	7/13/05 0:00	7/1/42 0:00	NIA	125096	Private	TRUE	TRUE	NIA	10582001	4/6/22	PA-19-130	4R00AG062723-03	R00
NIAMS	8460099	6/17/13 0:00	PA-11-197	5K99AR062595-02	5	K99	AR	62595	2		CIBOTTI RICARDO	7/1/12 0:00	6/30/14 0:00	Arthritis and Musculoskeletal and Skin Diseases Special Grants Study Section[AMS]	9861242	12	PHYSIOLOGY	71037113	LHGDNJMZ64Y1	71037113	LHGDNJMZ64Y1	US	40.763746	-73.955386	7056601	ROCKEFELLER_U	NEW YORK	NY	GRADUATE SCHOOLS	100656399	UNITED STATES	N	41456	41820	846	Other Research-Related	7/5/05 0:00	9/20/61 0:00	NIAMS	95593	Private	FALSE	FALSE	NIAMS	8882904	41835	PA-11-197	4R00AR062595-03	R00
NCI	9146855	7/19/16 0:00	PA-15-083	5K99CA201248-02	5	K99	CA	201248	2		RADAEV SERGEY	9/21/15 0:00	8/14/17 0:00	Transition to Independence Study Section (I)[NCI-I]	11937532	8	UnavaiLABle	73130411	FLJ7DQKLL226	73130411	FLJ7DQKLL226	US	42.363198	-71.068772	4907701	MASSACHUSETTS_GENERAL_HOSP	BOSTON	MA	Independent Hospitals	21142621	UNITED STATES	N	42614	42961	398	Other Research-Related	7/8/05 0:00	8/20/50 0:00	NCI	164592	Private	TRUE	TRUE	NCI	9526126	42965	PA-15-083	4R00CA201248-03	R00
NCI	9371209	6/27/17 0:00	PA-16-193	1K99CA218869-01	1	K99	CA	218869	1		RADAEV SERGEY	8/1/17 0:00	7/31/18 0:00	Transition to Independence Study Section (I)[NCI-I]	11661535	1	RADIATION-DIAGNOSTIC/ONCOLOGY	68552207	L6NFUM28LQM5	68552207	L6NFUM28LQM5	US	38.664368	-90.323797	9083901	WASHINGTON_U	SAINT LOUIS	MO	SCHOOLS OF MEDICINE	631304862	UNITED STATES	N	42948	43312	398	Other Research-Related	7/9/05 0:00	5/8/14 0:00	NCI	151339	Private	TRUE	TRUE	NCI	9730716	43321	PA-16-193	4R00CA218869-02	R00
NEI	8528613	41512	PA-11-197	5K99EY022671-02	5	K99	EY	22671	2		AGARWAL NEERAJ	41153	42247	ZEY1-VSN(10)	7029988	7	MISCELLANEOUS	1425594	E2NYLCDML6V1	1425594	E2NYLCDML6V1	US	42.359128	-71.093339	4911501	MASSACHUSETTS_INST_OF_TECH	CAMBRIDGE	MA	ORGANIZED RESEARCH UNITS	21421029	UNITED STATES	N	41518	42247	867	Other Research-Related	2013	90000	NEI	90000	Private	FALSE	FALSE	NEI	9385393	42905	PA-11-197	4R00EY022671-03	R00
NIDDK	7772586	2/23/10 0:00	PA-09-036	1K99DK085329-01	1	K99	DK	85329	1		PODSKALNY JUDITH M	3/1/10 0:00	12/31/10 0:00	Digestive Diseases and Nutrition C Study Section[DDK-C]	9774059	12	INTERNAL MEDICINE/MEDICINE	121911077	M5SZJ6VHUHN8	121911077	M5SZJ6VHUHN8	US	40.669895	-73.974354	5998304	NEW_YORK_U_SCH_OF_MED	NEW YORK	NY	SCHOOLS OF MEDICINE	10016	UNITED STATES	N	40238	40543	847	Other Research-Related	7/2/05 0:00	5/29/46 0:00	NIDDK	90000	Private	FALSE	FALSE	NIDDK	8198008	40658		4R00DK085329-02	R00
NEI	8976161	12/25/15 0:00	PA-14-042	5K99EY025026-02	5	K99	EY	25026	2		AGARWAL NEERAJ	12/2/14 0:00	8/31/17 0:00	ZEY1-VSN(03)	11331514	49	UnavaiLABle	78731668	NNJ6BMBTFGN5	78731668	NNJ6BMBTFGN5	US	32.8863	-117.243929	7210001	SALK_INST_FOR_BIOLOGICAL_STUDIES	La Jolla	CA	Research Institutes	920371002	UNITED STATES	N	42339	42978	867	Other Research-Related	7/8/05 0:00	6/7/58 0:00	NEI	94392	Private	FALSE	FALSE	NEI	9549196	42989	PA-14-042	4R00EY025026-03	R00
NHLBI	8805540	12/16/14 0:00	PA-14-042	1K99HL125895-01	1	K99	HL	125895	1		CARLSON DREW E	7/1/15 0:00	6/30/16 0:00	ZHL1-CSR-P(O1)	11085773	3	INTERNAL MEDICINE/MEDICINE	43207562	FL6GV84CKN57	43207562	FL6GV84CKN57	US	41.310925	-72.926428	9420201	YALE_U	NEW HAVEN	CT	SCHOOLS OF MEDICINE	65208327	UNITED STATES	N	42186	42551	837	Other Research-Related	7/7/05 0:00	2/10/61 0:00	NHLBI	131895	Private	FALSE	TRUE	NHLBI	9376977	42719	PA-14-042	4R00HL125895-02	R00
NIGMS	8286206	6/29/12 0:00	PA-10-063	5K99GM098600-02	5	K99	GM	98600	2		ZLOTNIK HINDA	7/1/11 0:00	12/31/12 0:00	ZGM1-BRT-X(KR)	8965617	7	UnavaiLABle	120989983	C186U32QSBR9	120989983	C186U32QSBR9	US	42.363037	-71.08963	1742101	WHITEHEAD_INST_FOR_BIOMED_RES	CAMBRIDGE	MA	Research Institutes	21421025	UNITED STATES	N	41091	41274	859	Other Research-Related	7/4/05 0:00	4/5/21 0:00	NIGMS	44291	Private	FALSE	FALSE	NIGMS	8583028	41264	PA-11-197	4R00GM098600-03	R00
NCI	9653165	3/1/19 0:00	PA-16-193	5K99CA226357-02	5	K99	CA	226357	2		RADAEV SERGEY	3/1/18 0:00	12/31/20 0:00	Transition to Independence Study Section (I)[NCI-I]	14657348	12	UnavaiLABle	64931884	KUKXRCZ6NZC2	64931884	KUKXRCZ6NZC2	US	40.764045	-73.956024	5079202	SLOAN-KETTERING_INST_CAN_RES	NEW YORK	NY	Research Institutes	100656007	UNITED STATES	N	43525	44196	394	Other Research-Related	7/11/05 0:00	4/2/49 0:00	NCI	127563	Private	FALSE	FALSE	NCI	10305913	##########	PA-16-193	4R00CA226357-03	R00
NIGMS	7652520	39983	PA-07-297	5K99GM081450-02	5	K99	GM	81450	2		CARTER ANTHONY D	39638	40056	ZGM1-BRT-9(KR)	6846572	7	GENETICS	47006379	JDLVAVGYJQ21	47006379	JDLVAVGYJQ21	US	42.335672	-71.104237	3212902	HARVARD_MED_SCH	BOSTON	MA	SCHOOLS OF MEDICINE	21201616	UNITED STATES	N	39995	40056	859	Other Research-Related	2009	15000	NIGMS	15000	Private	FALSE	FALSE	NIGMS	7881073	40056	PA-09-036	4R00GM081450-03	R00
NHLBI	7872318	5/28/10 0:00	PA-09-036	1K99HL102154-01	1	K99	HL	102154	1		MONDORO TRACI	6/1/10 0:00	5/31/12 0:00	ZHL1-CSR-Z(F2)	10039135	7	UnavaiLABle	120989983	C186U32QSBR9	120989983	C186U32QSBR9	US	42.363037	-71.08963	1742101	WHITEHEAD_INST_FOR_BIOMED_RES	CAMBRIDGE	MA	Research Institutes	21421025	UNITED STATES	N	40330	41060	837	Other Research-Related	7/2/05 0:00	5/29/46 0:00	NHLBI	90000	Private	FALSE	FALSE	NHLBI	8484940	41138	PA-11-197	4R00HL102154-02	R00
NCI	9307739	6/20/17 0:00	PA-15-083	5K99CA207865-02	5	K99	CA	207865	2		SCHMIDT MICHAEL K	7/1/16 0:00	12/31/17 0:00	Transition to Independence Study Section (I)[NCI-I]	11638646	7	BIOCHEMISTRY	47006379	JDLVAVGYJQ21	47006379	JDLVAVGYJQ21	US	42.335672	-71.104237	3212902	HARVARD_MED_SCH	BOSTON	MA	SCHOOLS OF MEDICINE	21201616	UNITED STATES	N	42917	43100	398	Other Research-Related	7/9/05 0:00	8/18/73 0:00	NCI	99943	Private	FALSE	FALSE	NCI	9600289	43068	PA-15-083	4R00CA207865-03	R00
NCI	9780459	8/16/19 0:00	PA-16-193	5K99CA226400-02	5	K99	CA	226400	2		SCHMIDT MICHAEL K	9/7/18 0:00	6/30/20 0:00	ZCA1-RTRB-B(M1)	12628430	7	MISCELLANEOUS	1425594	E2NYLCDML6V1	1425594	E2NYLCDML6V1	US	42.359128	-71.093339	4911501	MASSACHUSETTS_INST_OF_TECH	CAMBRIDGE	MA	ORGANIZED RESEARCH UNITS	21421029	UNITED STATES	N	43709	44012	398	Other Research-Related	7/11/05 0:00	8/3/45 0:00	NCI	126225	Private	FALSE	FALSE	NCI	10156469	44008	PA-16-193	4R00CA226400-03	R00
NHLBI	9743311	3/9/19 0:00	PA-18-398	1K99HL143036-01A1	1	K99	HL	143036	1	A	HUANG LI-SHIN	4/1/19 0:00	3/31/20 0:00	NHLBI Mentored Transition to Independence Study Section[MTI(JA)]	11610002	12	GENETICS	71037113	LHGDNJMZ64Y1	71037113	LHGDNJMZ64Y1	US	40.763746	-73.955386	7056601	ROCKEFELLER_U	NEW YORK	NY	GRADUATE SCHOOLS	100656399	UNITED STATES	N	43556	43921	837	Other Research-Related	7/11/05 0:00	9/16/86 0:00	NHLBI	177768	Private	TRUE	FALSE	NHLBI	10091720	43920	PA-18-398	4R00HL143036-02	R00
NINDS	10138044	4/29/21	PAR-18-814	5K99NS115918-02	5	K99	NS	115918	2		DAVID KAREN KATE	4/15/20	11/30/21	ZNS1-SRB-X(04)	11990730	13	NEUROSCIENCES	124726725	GS3YEVSS12N6	124726725	GS3YEVSS12N6	US	37.870017	-122.268624	577502	U_OF_CALIFORNIA_BERKELEY	BERKELEY	CA	ORGANIZED RESEARCH UNITS	947101749	UNITED STATES	N	4/1/21	11/30/21	853	Other Research-Related	7/13/05 0:00	11/18/47 0:00	NINDS	127062	public	FALSE	FALSE	NINDS	10467100	12/8/21	PAR-18-814	4R00NS115918-03	R00
NCI	8868585	8/21/15 0:00	PA-14-042	1K99CA194198-01	1	K99	CA	194198	1		SCHMIDT MICHAEL K	9/1/15 0:00	7/31/16 0:00	Transition to Independence Study Section (I)[NCI-I]	9365636	18	RADIATION-DIAGNOSTIC/ONCOLOGY	9214214	HJD6G4D6TJY5	9214214	HJD6G4D6TJY5	US	37.426852	-122.17047	8046501	STANFORD_U	STANFORD	CA	SCHOOLS OF MEDICINE	943052004	UNITED STATES	N	42248	42582	398	Other Research-Related	7/7/05 0:00	5/30/38 0:00	NCI	123603	Private	FALSE	FALSE	NCI	9309147	42619	PA-14-042	4R00CA194198-02	R00
NICHD	8541042	9/3/13 0:00	PA-11-197	5K99HD073327-02	5	K99	HD	73327	2		KING ROSALIND B	9/6/12 0:00	7/31/14 0:00	Population Sciences Study Section[CHHD-W]	10948784	7	PUBLIC HEALTH & PREV MEDICINE	1910777	FTMTDMBR29C7	1910777	FTMTDMBR29C7	US	39.325256	-76.605131	4134401	JOHNS_HOPKINS_U	BALTIMORE	MD	SCHOOLS OF PUBLIC HEALTH	212182680	UNITED STATES	N	41487	41851	865	Other Research-Related	7/5/05 0:00	6/2/74 0:00	NICHD	136755	Private	FALSE	TRUE	NICHD	8743572	41616	PA-11-197	4R00HD073327-03	R00
NLM	8442618	9/1/12 0:00	PA-11-197	1K99LM011389-01A1	1	K99	LM	11389	1	A	SIM HUA-CHUAN	9/30/12 0:00	9/29/13 0:00	ZLM1-ZH-C(01)	10576716	1	UnavaiLABle	6471700	Y2K4F9RPRRG7	6471700	Y2K4F9RPRRG7	US	44.02432	-92.46011	4976101	MAYO_CLINIC_ROCHESTER	ROCHESTER	MN	Other Domestic Non-Profits	559050001	UNITED STATES	N	41182	41546	879	Other Research-Related	7/4/05 0:00	5/6/64 0:00	NLM	96552	Private	FALSE	FALSE	NLM	8686238	41513	PA-11-197	4R00LM011389-02	R00
NICHD	8321387	7/12/12 0:00	PA-10-063	5K99HD069458-02	5	K99	HD	69458	2		TAYMANS SUSAN	8/19/11 0:00	2/28/13 0:00	Reproduction Andrology and Gynecology Study Section[CHHD-R]	10656463	2	UnavaiLABle	42140483	XR6LMXNKDJJ1	42140483	XR6LMXNKDJJ1	US	44.365361	-68.196303	7096501	JACKSON_LAB	BAR HARBOR	ME	Research Institutes	46091523	UNITED STATES	N	41122	41333	865	Other Research-Related	7/4/05 0:00	5/29/46 0:00	NICHD	90000	Private	FALSE	FALSE	NICHD	8635656	41366	PA-10-063	4R00HD069458-03	R00
NIEHS	8791316	1/26/15 0:00	PA-11-197	5K99ES023450-02	5	K99	ES	23450	2		CHADWICK LISA	2/1/14 0:00	1/31/16 0:00	ZES1-LWJ-D(K9)	9336260	7	PUBLIC HEALTH & PREV MEDICINE	149617367	UNVDZNFA8R29	149617367	UNVDZNFA8R29	US	42.335306	-71.102775	3212904	HARVARD_SCH_OF_PUBLIC_HEALTH	BOSTON	MA	SCHOOLS OF PUBLIC HEALTH	21156028	UNITED STATES	N	42036	42400	113	Other Research-Related	7/7/05 0:00	10/19/22 0:00	NIEHS	81377	Private	TRUE	FALSE	NIEHS	9177788	42438	PA-11-197	4R00ES023450-03	R00
NCI	10102218	4/20/21	RFA-CA-19-029	5K99CA246076-02	5	K99	CA	246076	2		RADAEV SERGEY	5/1/20	4/30/22	ZCA1-TCRB-T(O2)	15587188	12	PUBLIC HEALTH & PREV MEDICINE	94878337	KMH5K9V7S518	94878337	KMH5K9V7S518	US	37.767442	-122.413937	577508	U_OF_CALIFORNIA_SAN_FRANCISCO	SAN FRANCISCO	CA	SCHOOLS OF MEDICINE	941432510	UNITED STATES	N	5/1/21	4/30/22	398	Other Research-Related	7/13/05 0:00	10/28/53 0:00	NCI	129233	public	FALSE	FALSE	NCI	10654122	8/31/22	RFA-CA-19-029	4R00CA246076-03	R00
NIEHS	9917782	4/7/20 0:00	PA-18-398	5K99ES030403-02	5	K99	ES	30403	2		BOYLES ABEE	4/17/19 0:00	11/30/21 0:00	ZES1-JAB-D(K9)	11720462	12	PEDIATRICS	121911077	M5SZJ6VHUHN8	121911077	M5SZJ6VHUHN8	US	40.669895	-73.974354	5998304	NEW_YORK_U_SCH_OF_MED	NEW YORK	NY	SCHOOLS OF MEDICINE	10016	UNITED STATES	N	43922	44530	113	Other Research-Related	7/12/05 0:00	4/12/01 0:00	NIEHS	110041	Private	TRUE	TRUE	NIEHS	10492210	12/1/21	PA-18-398	4R00ES030403-03	R00
NLM	7921476	40414	PA-07-297	5K99LM009889-02	5	K99	LM	9889	2		SIM HUA-CHUAN	40057	40786	ZLM1-ZH-C(M3)	9098537	3	BIOSTATISTICS & OTHER MATH SCI	96997515	NPSNT86JKN51	96997515	NPSNT86JKN51	US	45.49882	-122.685647	6297007	OREGON_HEALTH_&_SCI_U	PORTLAND	OR	SCHOOLS OF MEDICINE	972393098	UNITED STATES	N	40422	40786	879	Other Research-Related	2010	110591	NLM	110591	Public	FALSE	FALSE	NLM	8299311	40777	PA-07-297	4R00LM009889-03	R00
NIMH	8323243	7/12/12 0:00	PA-10-063	5K99MH093458-02	5	K99	MH	93458	2		DESMOND NANCY L	8/22/11 0:00	2/28/14 0:00	ZMH1-ERB-L(01)	10311016	7	PSYCHIATRY	1910777	FTMTDMBR29C7	1910777	FTMTDMBR29C7	US	39.325256	-76.605131	4134401	JOHNS_HOPKINS_U	BALTIMORE	MD	SCHOOLS OF MEDICINE	212182680	UNITED STATES	N	41122	41698	281	Other Research-Related	7/4/05 0:00	9/25/97 0:00	NIMH	72223	Private	TRUE	TRUE	NIMH	8836668	41804	PA-10-063	4R00MH093458-03	R00
NHLBI	8470699	5/21/13 0:00	PA-10-063	7K99HL104002-02	7	K99	HL	104002	2		CARLSON DREW E	6/1/12 0:00	4/30/15 0:00	ZHL1-CSR-P(O2)	11742519	18	INTERNAL MEDICINE/MEDICINE	9214214	HJD6G4D6TJY5	9214214	HJD6G4D6TJY5	US	37.426852	-122.17047	8046501	STANFORD_U	STANFORD	CA	SCHOOLS OF MEDICINE	943052004	UNITED STATES	N	41416	42124	837	Other Research-Related	7/5/05 0:00	4/27/84 0:00	NHLBI	103848	Private	FALSE	TRUE	NHLBI	9377576	42727	PA-10-063	4R00HL104002-03	R00
NIMH	9920206	4/8/20 0:00	PA-18-398	5K99MH117264-02	5	K99	MH	117264	2		VAN'T VEER ASHLEE V	5/1/19 0:00	2/14/21 0:00	ZMH1-ERB-M(01)	14123991	27	NONE	9584210	U2JMKHNS5TG4	9584210	U2JMKHNS5TG4	US	34.134332	-118.12652	1073501	CALIFORNIA_INST_OF_TECH	PASADENA	CA	SCHOOLS OF ARTS AND SCIENCES	911250001	UNITED STATES	N	43952	44241	242	Other Research-Related	7/12/05 0:00	3/26/03 0:00	NIMH	110754	Private	FALSE	FALSE	NIMH	10269964	##########	PA-18-398	4R00MH117264-03	R00
NCI	9567116	7/26/18 0:00	PA-16-193	5K99CA215360-02	5	K99	CA	215360	2		RADAEV SERGEY	9/18/17 0:00	8/31/20 0:00	Transition to Independence Study Section (I)[NCI-I]	10598704	5	UnavaiLABle	79917897	GYLUH9UXHDX5	79917897	GYLUH9UXHDX5	US	36.143784	-86.800995	10040927	VANDERBILT_U_MED_CTR	NASHVILLE	TN	Independent Hospitals	372320011	UNITED STATES	N	43344	44074	398	Other Research-Related	7/10/05 0:00	2/9/09 0:00	NCI	112901	Private	TRUE	TRUE	NCI	10304319	44229	PA-16-193	4R00CA215360-03	R00
NHLBI	8703771	6/9/14 0:00	PA-11-197	5K99HL116645-02	5	K99	HL	116645	2		CARLSON DREW E	7/18/13 0:00	6/30/15 0:00	ZHL1-CSR-P(O1)	10322198	13	INTERNAL MEDICINE/MEDICINE	78861598	C8H9CNG1VBD9	78861598	C8H9CNG1VBD9	US	40.790284	-73.946781	3839801	ICAHN_SCH_OF_MED_AT_MOUNT_SINAI	NEW YORK	NY	SCHOOLS OF MEDICINE	100296574	UNITED STATES	N	41821	42185	837	Other Research-Related	7/6/05 0:00	7/18/55 0:00	NHLBI	129861	Private	TRUE	TRUE	NHLBI	9091832	42236	PA-11-197	4R00HL116645-03	R00
NIDA	10190881	6/2/21	PA-19-130	5K99DA051534-02	5	K99	DA	51534	2		CRUMP ARIA	7/1/20	1/31/22	ZDA1-SXM-M(07)S	14268488	18	INTERNAL MEDICINE/MEDICINE	9214214	HJD6G4D6TJY5	9214214	HJD6G4D6TJY5	US	37.426852	-122.17047	8046501	STANFORD_U	STANFORD	CA	SCHOOLS OF MEDICINE	943052004	UNITED STATES	N	7/1/21	1/31/22	279	Other Research-Related	2021	179582	NIDA	179582	Private	TRUE	TRUE	NIDA	10514673	1/27/22	PA-19-130	4R00DA051534-03	R00
NEI	7805458	4/21/10 0:00	PA-07-297	5K99EY019355-02	5	K99	EY	19355	2		GREENWELL THOMAS	5/1/09 0:00	8/31/10 0:00	ZEY1-VSN(01)	9259404	5	MICROBIOLOGY/IMMUN/VIROLOGY	82359691	LN53LCFJFL45	82359691	LN53LCFJFL45	US	42.369697	-71.11193	3212901	HARVARD_U	CAMBRIDGE	MA	SCHOOLS OF ARTS AND SCIENCES	21385369	UNITED STATES	N	40299	40421	867	Other Research-Related	7/2/05 0:00	2/18/82 0:00	NEI	30000	Private	FALSE	FALSE	NEI	8109606	40413	PA-10-063	4R00EY019355-03	R00
NINR	8339355	7/19/12 0:00	PA-10-063	5K99NR013177-02	5	K99	NR	13177	2		HUSS KAREN	9/28/11 0:00	7/31/13 0:00	Nursing Science Review Committee[NRRC(51)]	10803723	3	OTHER HEALTH PROFESSIONS	42250712	GM1XX56LEP58	42250712	GM1XX56LEP58	US	39.953462	-75.193983	6463801	U_OF_PENNSYLVANIA	PHILADELPHIA	PA	SCHOOLS OF NURSING	191046205	UNITED STATES	N	41122	41486	361	Other Research-Related	7/4/05 0:00	7/19/51 0:00	NINR	91877	Private	FALSE	TRUE	NINR	8662837	41528	PA-10-063	4R00NR013177-03	R00
NIMH	7337065	1/31/08 0:00	PA-06-133	5K99MH079614-02	5	K99	MH	79614	2		DESMOND NANCY L	1/1/07 0:00	3/31/08 0:00	ZMH1-ERB-H(06)	8620000	7	NEUROSCIENCES	1910777	FTMTDMBR29C7	1910777	FTMTDMBR29C7	US	39.325256	-76.605131	4134401	JOHNS_HOPKINS_U	BALTIMORE	MD	SCHOOLS OF MEDICINE	212182680	UNITED STATES	N	39472	39538	281	Other Research-Related	6/30/05 0:00	2/2/44 0:00	NIMH	16104	Private	FALSE	FALSE	NIMH	7612311	39687		4R00MH079614-03	R00
NICHD	10131826	3/15/21	PA-19-130	5K99HD101657-02	5	K99	HD	101657	2		ESPOSITO LAYLA E	4/1/20	12/31/21	Biobehavioral and Behavioral Sciences Study Section[CHHD-H]	15974650	13	PUBLIC HEALTH & PREV MEDICINE	621889815	QHF5ZZ114M72	621889815	QHF5ZZ114M72	US	40.8415	-73.9414	1833205	COLUMBIA_U_HEALTH_SCI	NEW YORK	NY	SCHOOLS OF PUBLIC HEALTH	100323725	UNITED STATES	N	4/1/21	12/31/21	865	Other Research-Related	7/13/05 0:00	11/1/57 0:00	NICHD	130698	Private	FALSE	FALSE	NICHD	10534336	6/11/22	PA-19-130	4R00HD101657-03	R00
NCI	9251245	3/9/17 0:00	PA-15-083	5K99CA197804-02	5	K99	CA	197804	2		SCHMIDT MICHAEL K	4/1/16 0:00	3/31/18 0:00	Transition to Independence Study Section (I)[NCI-I]	11437003	5	UROLOGY	66469933	S352L5PJLMP8	66469933	S352L5PJLMP8	US	33.791247	-84.3249	2384501	EMORY_U	ATLANTA	GA	SCHOOLS OF MEDICINE	303221007	UNITED STATES	N	42826	43190	398	Other Research-Related	7/9/05 0:00	11/26/05 0:00	NCI	111730	Private	TRUE	TRUE	NCI	9692830	43258	PA-15-083	4R00CA197804-03	R00
NCI	9371223	6/30/17 0:00	PA-16-193	1K99CA218870-01	1	K99	CA	218870	1		RADAEV SERGEY	8/1/17 0:00	7/31/19 0:00	Transition to Independence Study Section (I)[NCI-I]	12302905	8	UnavaiLABle	73130411	FLJ7DQKLL226	73130411	FLJ7DQKLL226	US	42.363198	-71.068772	4907701	MASSACHUSETTS_GENERAL_HOSP	BOSTON	MA	Independent Hospitals	21142621	UNITED STATES	N	42948	43312	398	Other Research-Related	7/9/05 0:00	7/12/92 0:00	NCI	143370	Private	TRUE	TRUE	NCI	9752774	43340	PA-16-193	4R00CA218870-03	R00
NCI	10114605	2/12/21	RFA-CA-20-014	1K99CA256353-01	1	K99	CA	256353	1		RADAEV SERGEY	2/12/21	1/31/22	ZCA1-RTRB-U(O1)	14080906	8	UnavaiLABle	73130411	FLJ7DQKLL226	73130411	FLJ7DQKLL226	US	42.363198	-71.068772	4907701	MASSACHUSETTS_GENERAL_HOSP	BOSTON	MA	Independent Hospitals	21142621	UNITED STATES	N	2/12/21	1/31/22	398	Other Research-Related	2021	178080	NCI	178080	Private	FALSE	FALSE	NCI	10569343	6/1/22	RFA-CA-20-014	4R00CA256353-02	R00
NIBIB	9554897	7/10/18 0:00	PA-16-193	5K99EB022634-02	5	K99	EB	22634	2		ATANASIJEVIC TATJANA	9/5/17 0:00	6/30/19 0:00	ZEB1-OSR-D(M1)S	10443515	18	RADIATION-DIAGNOSTIC/ONCOLOGY	9214214	HJD6G4D6TJY5	9214214	HJD6G4D6TJY5	US	37.426852	-122.17047	8046501	STANFORD_U	STANFORD	CA	SCHOOLS OF MEDICINE	943052004	UNITED STATES	N	43282	43646	286	Other Research-Related	7/10/05 0:00	5/15/52 0:00	NIBIB	92178	Private	TRUE	TRUE	NIBIB	9928547	43663	PA-16-193	4R00EB022634-03	R00
NHLBI	8725728	7/18/14 0:00	PA-11-197	5K99HL114721-02	5	K99	HL	114721	2		CARLSON DREW E	8/23/13 0:00	2/28/15 0:00	ZHL1-CSR-P(F2)	9563419	7	PATHOLOGY	1910777	FTMTDMBR29C7	1910777	FTMTDMBR29C7	US	39.325256	-76.605131	4134401	JOHNS_HOPKINS_U	BALTIMORE	MD	SCHOOLS OF MEDICINE	212182680	UNITED STATES	N	41852	42063	837	Other Research-Related	7/6/05 0:00	4/14/94 0:00	NHLBI	107487	Private	FALSE	TRUE	NHLBI	9000222	42051	PA-11-197	4R00HL114721-03	R00
NICHD	8458510	3/22/13 0:00	PA-11-197	5K99HD072035-02	5	K99	HD	72035	2		HENKEN DEBORAH B	4/12/12 0:00	3/31/14 0:00	Developmental Biology Study Section[CHHD-C]	7016728	4	NEUROSCIENCES	79289626	Z3FGN9MF92U2	079289626; 948117312	J2KGU972RXG3; Z3FGN9MF92U2	US	44.045509	-123.069741	6297005	U_OF_OREGON	EUGENE	OR	ORGANIZED RESEARCH UNITS	974035219	UNITED STATES	N	41365	41729	865	Other Research-Related	7/5/05 0:00	5/2/02 0:00	NICHD	110426	Public	TRUE	FALSE	NICHD	8804314	41730	PA-11-197	4R00HD072035-03	R00
NICHD	9049524	3/23/16 0:00	PA-14-042	5K99HD080742-02	5	K99	HD	80742	2		YOSHINAGA KOJI	4/15/15 0:00	3/31/17 0:00	Obstetrics and Maternal-Fetal Biology Study Section[CHHD-B]	10387029	9	ANATOMY/CELL BIOLOGY	51113330	FXKMA43NTV21	51113330	FXKMA43NTV21	US	29.70926	-95.400851	481201	BAYLOR_COLL_OF_MED	HOUSTON	TX	SCHOOLS OF MEDICINE	770303411	UNITED STATES	N	42461	42825	865	Other Research-Related	7/8/05 0:00	1/27/03 0:00	NICHD	110696	Private	FALSE	FALSE	NICHD	9425675	42948	PA-14-042	4R00HD080742-03	R00
NIMH	9353876	8/10/17 0:00	PA-16-077	5K99MH111836-02	5	K99	MH	111836	2		VAN'T VEER ASHLEE V	9/16/16 0:00	9/15/18 0:00	ZMH1-ERB-M(05)	8781418	12	BIOLOGY	71037113	LHGDNJMZ64Y1	71037113	LHGDNJMZ64Y1	US	40.763746	-73.955386	7056601	ROCKEFELLER_U	NEW YORK	NY	GRADUATE SCHOOLS	100656399	UNITED STATES	N	42994	43358	242	Other Research-Related	7/9/05 0:00	11/18/47 0:00	NIMH	127062	Private	FALSE	FALSE	NIMH	9815713	43517	PA-16-077	4R00MH111836-03	R00
NHLBI	9430460	1/26/18 0:00	PA-16-077	5K99HL135442-02	5	K99	HL	135442	2		HUANG LI-SHIN	2/15/17 0:00	1/31/19 0:00	NHLBI Mentored Transition to Independence Study Section[MTI(OA)]	11638651	5	UnavaiLABle	79917897	GYLUH9UXHDX5	79917897	GYLUH9UXHDX5	US	36.143784	-86.800995	10040927	VANDERBILT_U_MED_CTR	NASHVILLE	TN	Independent Hospitals	372320011	UNITED STATES	N	43132	43496	837	Other Research-Related	7/10/05 0:00	8/4/26 0:00	NHLBI	119286	Private	TRUE	TRUE	NHLBI	9849878	43500	PA-16-077	4R00HL135442-03	R00
NIAID	9989030	7/22/20 0:00	PAR-17-329	5K99AI146271-02	5	K99	AI	146271	2		GONDRE-LEWIS TIMOTHY A	8/5/19 0:00	8/31/20 0:00	Allergy Immunology and Transplantation Research Committee[AITC]	10223151	5	PATHOLOGY	66469933	S352L5PJLMP8	66469933	S352L5PJLMP8	US	33.791247	-84.3249	2384501	EMORY_U	ATLANTA	GA	SCHOOLS OF MEDICINE	303221007	UNITED STATES	N	44044	44074	855	Other Research-Related	7/12/05 0:00	3/13/02 0:00	NIAID	37328	Private	TRUE	FALSE	NIAID	10221117	44077	PAR-17-329	4R00AI146271-03	R00
NIDCD	9176014	11/30/16 0:00	PA-15-083	5K99DC015014-02	5	K99	DC	15014	2		POREMBA AMY	12/1/15 0:00	11/30/17 0:00	Communication Disorders Review Committee[CDRC]	7846550	12	OTOLARYNGOLOGY	121911077	M5SZJ6VHUHN8	121911077	M5SZJ6VHUHN8	US	40.669895	-73.974354	5998304	NEW_YORK_U_SCH_OF_MED	NEW YORK	NY	SCHOOLS OF MEDICINE	10016	UNITED STATES	N	42705	43069	173	Other Research-Related	7/9/05 0:00	10/4/31 0:00	NIDCD	121173	Private	FALSE	FALSE	NIDCD	9599069	43098	PA-15-083	4R00DC015014-03	R00
NCI	9165038	42550	PA-15-083	1K99CA208032-01	1	K99	CA	208032	1		SCHMIDT MICHAEL K	42552	42766	Transition to Independence Study Section (I)[NCI-I]	11787688	8	UnavaiLABle	73130411	FLJ7DQKLL226	73130411	FLJ7DQKLL226	US	42.363198	-71.068772	4907701	MASSACHUSETTS_GENERAL_HOSP	BOSTON	MA	Independent Hospitals	21142621	UNITED STATES	N	42552	42766	398	Other Research-Related	2016	180360	NCI	180360	Private	TRUE	FALSE	NCI	9405058	42755	PA-15-083	4R00CA208032-02	R00
NIA	7788083	3/18/10 0:00	PA-07-297	5K99AG032362-02	5	K99	AG	32362	2		REFOLO LORENZO	4/1/09 0:00	3/31/11 0:00	Basic Neuroscience of Aging Study Section[NIA-N]	8509378	4	UnavaiLABle	153223151	GKPBCFV1QMM3	153223151	GKPBCFV1QMM3	US	30.264703	-81.444793	4976105	MAYO_CLINIC_JACKSONVILLE	JACKSONVILLE	FL	Other Domestic Non-Profits	322241865	UNITED STATES	N	40269	40633	866	Other Research-Related	7/2/05 0:00	5/29/46 0:00	NIA	90000	Private	FALSE	FALSE	NIA	8414480	40939	PA-11-297	4R00AG032362-03	R00
NEI	10134357	4/29/21	PA-19-130	5K99EY031339-02	5	K99	EY	31339	2		AGARWAL NEERAJ	5/1/20	3/31/22	ZEY1-VSN(03)	15102210	8	UnavaiLABle	73826000	XQQJEDK7JC21	73826000	XQQJEDK7JC21	US	42.36199	-71.06442	6948301	SCHEPENS_EYE_RES_INST	BOSTON	MA	Research Institutes	21142508	UNITED STATES	N	5/1/21	3/31/22	867	Other Research-Related	7/13/05 0:00	4/19/81 0:00	NEI	102744	Private	FALSE	FALSE	NEI	10550019	3/25/22	PA-19-130	4R00EY031339-03	R00
NIEHS	10162587	4/8/21	PA-19-130	5K99ES030749-02	5	K99	ES	30749	2		SMARR MELISSA M	5/11/20	8/18/21	ZES1-LAT-S(K9)	12316031	13	PUBLIC HEALTH & PREV MEDICINE	621889815	QHF5ZZ114M72	621889815	QHF5ZZ114M72	US	40.8415	-73.9414	1833205	COLUMBIA_U_HEALTH_SCI	NEW YORK	NY	SCHOOLS OF PUBLIC HEALTH	100323725	UNITED STATES	N	5/1/21	8/18/21	113	Other Research-Related	7/13/05 0:00	2/21/81 0:00	NIEHS	102687	Private	TRUE	TRUE	NIEHS	10422452	##########	PA-19-130	4R00ES030749-03	R00
NHLBI	7921032	6/23/10 0:00	PA-07-297	5K99HL092234-02	5	K99	HL	92234	2		CARLSON DREW E	9/1/09 0:00	12/31/10 0:00	ZHL1-CSR-Z(M3)	9121744	12	UnavaiLABle	99992430	KH6NJ6ND8737	99992430	KH6NJ6ND8737	US	37.767618	-122.394315	1567601	J_DAVID_GLADSTONE_INSTS	SAN FRANCISCO	CA	Research Institutes	941582261	UNITED STATES	N	40391	40543	837	Other Research-Related	7/2/05 0:00	10/29/81 0:00	NHLBI	102937	Private	FALSE	FALSE	NHLBI	8166311	40538	PA-10-063	4R00HL092234-03	R00
NHLBI	7707283	8/24/09 0:00	PA-07-297	1K99HL096840-01	1	K99	HL	96840	1		ROTHGEB ANN E	9/1/09 0:00	8/31/10 0:00	ZHL1-CSR-Z(M3)	9348007	7	UnavaiLABle	30811269	QN6MS4VN7BD1	30811269	QN6MS4VN7BD1	US	42.336107	-71.107481	1080401	BRIGHAM_&_WOMENS_HOSP	BOSTON	MA	Independent Hospitals	21156110	UNITED STATES	N	40057	40421	837	Other Research-Related	7/1/05 0:00	12/22/74 0:00	NHLBI	136958	Private	TRUE	TRUE	NHLBI	8119217	40416	PA-07-297	4R00HL096840-02	R00
NIAMS	10242916	8/13/21	PA-19-130	5K99AR075876-02	5	K99	AR	75876	2		WASHABAUGH CHARLES H	9/1/20	8/31/22	Arthritis and Musculoskeletal and Skin Diseases Special Grants Study Section[AMS]	12090475	13	UnavaiLABle	73134603	R9NXPE2GTCN9	73134603	R9NXPE2GTCN9	US	42.371987	-83.076406	218602	HENRY_FORD_HEALTH_SYSTEM	DETROIT	MI	Independent Hospitals	482023450	UNITED STATES	N	9/1/21	8/31/22	846	Other Research-Related	7/13/05 0:00	4/3/48 0:00	NIAMS	90675	Private	FALSE	FALSE	NIAMS	10704290	9/23/22	PA-19-130	4R00AR075876-03	R00
NHGRI	9719875	3/13/19 0:00	PA-16-193	5K99HG010084-02	5	K99	HG	10084	2		BOYER JOY	6/11/18 0:00	5/31/20 0:00	Special Emphasis Panel[ZRG1-SEIR-R(80)]	14884731	13	UnavaiLABle	167204994	TYVNMW8FNQQ3	167204994	TYVNMW8FNQQ3	US	40.843076	-73.944206	1590919	NEW_YORK_STATE_PSY	NEW YORK	NY	Independent Hospitals	100321007	UNITED STATES	N	43556	43982	172	Other Research-Related	7/11/05 0:00	7/18/64 0:00	NHGRI	169673	Private	FALSE	FALSE	NHGRI	10137359	43983	PA-16-193	4R00HG010084-03	R00
NHLBI	8532970	7/9/13 0:00	PA-11-197	5K99HL111151-02	5	K99	HL	111151	2		TIGNO XENIA	9/1/12 0:00	7/31/14 0:00	ZHL1-CSR-P(M3)	6985780	4	ANATOMY/CELL BIOLOGY	44387793	TP7EK8DZV6N5	44387793	TP7EK8DZV6N5	US	36.007766	-78.926475	2221101	DUKE_U	DURHAM	NC	SCHOOLS OF MEDICINE	277054673	UNITED STATES	N	41487	41851	837	Other Research-Related	7/5/05 0:00	9/18/75 0:00	NHLBI	100704	Private	FALSE	TRUE	NHLBI	8843119	41817	PA-11-197	4R00HL111151-03	R00
NCI	9353350	7/20/17 0:00	PA-16-077	5K99CA212198-02	5	K99	CA	212198	2		SCHMIDT MICHAEL K	9/15/16 0:00	12/31/17 0:00	Transition to Independence Study Section (I)[NCI-I]	12491708	4	RADIATION-DIAGNOSTIC/ONCOLOGY	44387793	TP7EK8DZV6N5	44387793	TP7EK8DZV6N5	US	36.007766	-78.926475	2221101	DUKE_U	DURHAM	NC	SCHOOLS OF MEDICINE	277054673	UNITED STATES	N	42979	43100	398	Other Research-Related	7/9/05 0:00	12/10/17 0:00	NCI	116127	Private	TRUE	TRUE	NCI	9613328	43119	PA-16-077	4R00CA212198-03	R00
NIMH	8846139	42136	PA-11-197	5K99MH101367-02	5	K99	MH	101367	2		SARAMPOTE CHRISTOPHER S	41765	42766	ZMH1-ERB-L(02)	10381321	8	UnavaiLABle	73130411	FLJ7DQKLL226	73130411	FLJ7DQKLL226	US	42.363198	-71.068772	4907701	MASSACHUSETTS_GENERAL_HOSP	BOSTON	MA	Independent Hospitals	21142621	UNITED STATES	N	42125	42766	242	Other Research-Related	2015	118500	NIMH	118500	Private	TRUE	TRUE	NIMH	9131397	42762	PA-11-197	4R00MH101367-03	R00
NCI	9544176	8/2/18 0:00	PA-16-193	5K99CA218896-02	5	K99	CA	218896	2		RADAEV SERGEY	9/1/17 0:00	8/31/19 0:00	Transition to Independence Study Section (I)[NCI-I]	14263182	12	UnavaiLABle	64931884	KUKXRCZ6NZC2	64931884	KUKXRCZ6NZC2	US	40.764045	-73.956024	5079202	SLOAN-KETTERING_INST_CAN_RES	NEW YORK	NY	Research Institutes	100656007	UNITED STATES	N	43344	43708	398	Other Research-Related	7/10/05 0:00	3/1/06 0:00	NCI	148349	Private	TRUE	FALSE	NCI	10053373	43796	PA-16-193	4R00CA218896-03	R00
NIAID	10223164	6/30/21	PAR-17-329	5K99AI148604-02	5	K99	AI	148604	2		BOWDEN NADINE	7/24/20	6/30/22	Microbiology and Infectious Diseases B Research Study Section[MID-B]	11093867	8	UnavaiLABle	73130411	FLJ7DQKLL226	73130411	FLJ7DQKLL226	US	42.363198	-71.068772	4907701	MASSACHUSETTS_GENERAL_HOSP	BOSTON	MA	Independent Hospitals	21142621	UNITED STATES	N	7/1/21	6/30/22	855	Other Research-Related	7/13/05 0:00	4/23/73 0:00	NIAID	136350	Private	TRUE	TRUE	NIAID	10654120	8/22/22	PAR-17-329	4R00AI148604-03	R00
NIMH	9258497	5/4/17 0:00	PA-15-083	5K99MH109569-02	5	K99	MH	109569	2		VAN'T VEER ASHLEE V	4/15/16 0:00	4/30/17 0:00	ZMH1-ERB-S(01)	8782897	18	BIOMEDICAL ENGINEERING	9214214	HJD6G4D6TJY5	9214214	HJD6G4D6TJY5	US	37.426852	-122.17047	8046501	STANFORD_U	STANFORD	CA	SCHOOLS OF MEDICINE	943052004	UNITED STATES	N	42826	42855	242	Other Research-Related	7/9/05 0:00	8/27/22 0:00	NIMH	8275	Private	FALSE	FALSE	NIMH	9480885	42944	PA-15-083	4R00MH109569-03	R00
NICHD	7714486	8/31/09 0:00	PA-07-297	1K99HD061981-01	1	K99	HD	61981	1		TASCA RICHARD J	9/1/09 0:00	8/31/11 0:00	Reproduction Andrology and Gynecology Study Section[CHHD-R]	9629619	7	UnavaiLABle	76593722	Z1L9F1MM1RY3	76593722	Z1L9F1MM1RY3	US	42.337481	-71.104964	1504801	BOSTON_CHILDRENS_HOSP	BOSTON	MA	Independent Hospitals	21155724	UNITED STATES	N	40057	40421	864	Other Research-Related	7/1/05 0:00	2/13/66 0:00	NICHD	97200	Private	TRUE	FALSE	NICHD	8248880	40663		4R00HD061981-03	R00
NIDCR	9011520	2/24/16 0:00	PA-14-042	5K99DE025060-02	5	K99	DE	25060	2		FRIEDEN LESLIE A	4/1/15 0:00	1/31/17 0:00	NIDCR Special Grants Review Committee[DSR]	10639905	18	DENTISTRY	4514360	MKAGLD59JRL1	4514360	MKAGLD59JRL1	US	40.440909	-79.959125	2059802	U_OF_PITTSBURGH_AT_PITTSBURGH	PITTSBURGH	PA	SCHOOLS OF DENTISTRY/ORAL HYGN	152133320	UNITED STATES	N	42461	42766	121	Other Research-Related	7/8/05 0:00	2/27/57 0:00	NIDCR	93927	Public	FALSE	FALSE	NIDCR	9559944	43067	PA-16-285	7R00DE025060-04	R00
NICHD	9883823	2/25/20 0:00	PA-18-398	5K99HD097286-02	5	K99	HD	97286	2		ILEKIS JOHN V	3/1/19 0:00	2/28/21 0:00	Obstetrics and Maternal-Fetal Biology Study Section[CHHD-B]	15127687	13	PUBLIC HEALTH & PREV MEDICINE	78861598	C8H9CNG1VBD9	78861598	C8H9CNG1VBD9	US	40.790284	-73.946781	3839801	ICAHN_SCH_OF_MED_AT_MOUNT_SINAI	NEW YORK	NY	SCHOOLS OF MEDICINE	100296574	UNITED STATES	N	43891	44255	865	Other Research-Related	7/12/05 0:00	5/2/25 0:00	NICHD	118827	Private	TRUE	TRUE	NICHD	10378187	44288	PA-18-398	4R00HD097286-03	R00
NIGMS	8730205	7/15/14 0:00	PA-11-197	5K99GM107351-02	5	K99	GM	107351	2		SESMA MICHAEL A	9/9/13 0:00	6/30/15 0:00	ZGM1-TRN-X(KR)	10199354	7	UnavaiLABle	78200995	HMSNCM57QNR5	78200995	HMSNCM57QNR5	US	47.627342	-122.331593	861001	FRED_HUTCHINSON_CANCER_RES_CTR	SEATTLE	WA	Research Institutes	981094433	UNITED STATES	N	41852	42185	859	Other Research-Related	7/6/05 0:00	5/29/46 0:00	NIGMS	90000	Private	FALSE	FALSE	NIGMS	9100008	42205	PA-11-197	4R00GM107351-03	R00
NIA	9242213	2/21/17 0:00	PA-16-077	1K99AG052604-01A1	1	K99	AG	52604	1	A	GUO MAX	3/1/17 0:00	8/31/17 0:00	Biological Aging Study Section[NIA-B]	10934107	33	GENETICS	92530369	RN64EPNH8JC6	92530369	RN64EPNH8JC6	US	34.070199	-118.45102	577505	U_OF_CALIFORNIA_LOS_ANGELES	LOS ANGELES	CA	SCHOOLS OF MEDICINE	900952000	UNITED STATES	N	42795	42978	866	Other Research-Related	7/9/05 0:00	11/9/76 0:00	NIA	101122	Public	FALSE	FALSE	NIA	9551142	42990	PA-16-077	4R00AG052604-02	R00
NIDDK	10385893	9/9/21	PA-20-272	3K99DK122128-02S1	3	K99	DK	122128	2	S	CASTLE ARTHUR	9/1/19	3/13/22		14979488	7	NUTRITION	149617367	UNVDZNFA8R29	149617367	UNVDZNFA8R29	US	42.335306	-71.102775	3212904	HARVARD_SCH_OF_PUBLIC_HEALTH	BOSTON	MA	SCHOOLS OF PUBLIC HEALTH	21156028	UNITED STATES	N	9/1/20	3/13/22	847	Other Research-Related	7/13/05 0:00	10/14/84 0:00	NIDDK	67494	Private	FALSE	FALSE	NIDDK	10552803	3/15/22	PA-18-398	4R00DK122128-03	R00
NINR	9493551	5/21/18 0:00	PA-16-193	5K99NR016484-02	5	K99	NR	16484	2		TULLY LOIS	6/1/17 0:00	5/31/19 0:00	Nursing Science Review Committee[NRRC(67)]	12280423	3	OTHER HEALTH PROFESSIONS	42250712	GM1XX56LEP58	42250712	GM1XX56LEP58	US	39.953462	-75.193983	6463801	U_OF_PENNSYLVANIA	PHILADELPHIA	PA	SCHOOLS OF NURSING	191046205	UNITED STATES	N	43252	43616	361	Other Research-Related	7/10/05 0:00	2/9/53 0:00	NINR	92448	Private	FALSE	FALSE	NINR	9808108	43651	PA-16-193	4R00NR016484-03	R00
NCI	8804339	42143	PA-14-042	1K99CA190896-01	1	K99	CA	190896	1		SCHMIDT MICHAEL K	42143	42247	Transition to Independence Study Section (I)[NCI-I]	10753835	7	BIOLOGY	47006379	JDLVAVGYJQ21	47006379	JDLVAVGYJQ21	US	42.335672	-71.104237	3212902	HARVARD_MED_SCH	BOSTON	MA	SCHOOLS OF MEDICINE	21201616	UNITED STATES	N	42143	42247	398	Other Research-Related	2015	47346	NCI	47346	Private	FALSE	FALSE	NCI	9123710	42251	PA-14-042	4R00CA190896-02	R00
NCI	8521207	7/10/13 0:00	PA-11-197	5K99CA166186-02	5	K99	CA	166186	2		SCHMIDT MICHAEL K	8/2/12 0:00	8/31/14 0:00	Institutional Training and Education Study Section (F)[NCI-F]	10933867	18	RADIATION-DIAGNOSTIC/ONCOLOGY	9214214	HJD6G4D6TJY5	9214214	HJD6G4D6TJY5	US	37.426852	-122.17047	8046501	STANFORD_U	STANFORD	CA	SCHOOLS OF MEDICINE	943052004	UNITED STATES	N	41487	41882	398	Other Research-Related	7/5/05 0:00	1/23/23 0:00	NCI	154521	Private	FALSE	TRUE	NCI	8901581	41887	PA-11-197	4R00CA166186-03	R00
NHLBI	7920223	40415	PA-07-297	5K99HL097083-02	5	K99	HL	97083	2		SARKAR RITA	40057	40588	ZHL1-CSR-Z(M3)	9641973	7	ANATOMY/CELL BIOLOGY	47006379	JDLVAVGYJQ21	47006379	JDLVAVGYJQ21	US	42.335672	-71.104237	3212902	HARVARD_MED_SCH	BOSTON	MA	SCHOOLS OF MEDICINE	21201616	UNITED STATES	N	40391	40588	837	Other Research-Related	2010	90000	NHLBI	90000	Private	FALSE	FALSE	NHLBI	8166297	40585	PA-09-036	4R00HL097083-03	R00
NCI	7383853	39505	PA-06-133	5K99CA126980-02	5	K99	CA	126980	2		SCHMIDT MICHAEL K	39173	39903	ZCA1-RTRB-2(J1)	8656796	7	UnavaiLABle	76593722	Z1L9F1MM1RY3	76593722	Z1L9F1MM1RY3	US	42.337481	-71.104964	1504801	BOSTON_CHILDRENS_HOSP	BOSTON	MA	Independent Hospitals	21155724	UNITED STATES	N	39539	39903	398	Other Research-Related	2008	136820	NCI	136820	Private	TRUE	FALSE	NCI	7777589	39910	PA-06-133	4R00CA126980-03	R00
NIEHS	9459896	3/7/18 0:00	PA-16-077	5K99ES026729-02	5	K99	ES	26729	2		GRAY KIMBERLY A	4/1/17 0:00	9/21/18 0:00	ZES1-LWJ-J(KS)	12472937	33	PUBLIC HEALTH & PREV MEDICINE	92530369	RN64EPNH8JC6	92530369	RN64EPNH8JC6	US	34.070199	-118.45102	577505	U_OF_CALIFORNIA_LOS_ANGELES	LOS ANGELES	CA	SCHOOLS OF PUBLIC HEALTH	900952000	UNITED STATES	N	43191	43364	113	Other Research-Related	7/10/05 0:00	6/26/33 0:00	NIEHS	158328	Public	TRUE	FALSE	NIEHS	9743906	43364	PA-16-077	4R00ES026729-03	R00
NINDS	7777862	2/24/10 0:00	PA-07-297	5K99NS064146-02	5	K99	NS	64146	2		TAGLE DANILO A	3/1/09 0:00	2/28/11 0:00	ZNS1-SRB-M(61)	9345995	9	GENETICS	51113330	FXKMA43NTV21	51113330	FXKMA43NTV21	US	29.70926	-95.400851	481201	BAYLOR_COLL_OF_MED	HOUSTON	TX	SCHOOLS OF MEDICINE	770303411	UNITED STATES	N	40238	40602	853	Other Research-Related	7/2/05 0:00	11/18/39 0:00	NINDS	87616	Private	TRUE	FALSE	NINDS	8035761	40283	PA-07-297	4R00NS064146-03	R00
NIBIB	7322538	12/21/07 0:00	PA-06-133	5K99EB007182-02	5	K99	EB	7182	2		ERIM ZEYNEP	12/1/06 0:00	1/14/09 0:00	ZEB1-OSR-A(O1)S	8628161	18	RADIATION-DIAGNOSTIC/ONCOLOGY	9214214	HJD6G4D6TJY5	9214214	HJD6G4D6TJY5	US	37.426852	-122.17047	8046501	STANFORD_U	STANFORD	CA	SCHOOLS OF MEDICINE	943052004	UNITED STATES	N	39417	39827	286	Other Research-Related	6/30/05 0:00	5/29/46 0:00	NIBIB	90000	Private	FALSE	FALSE	NIBIB	7743540	39822	PA-06-133	4R00EB007182-03	R00
NIMH	9663349	3/15/19 0:00	PA-16-193	5K99MH113813-02	5	K99	MH	113813	2		DRISCOLL JAMIE	4/1/18 0:00	12/31/19 0:00	ZMH1-ERB-S(02)	12230607	7	UnavaiLABle	120989983	C186U32QSBR9	120989983	C186U32QSBR9	US	42.363037	-71.08963	1742101	WHITEHEAD_INST_FOR_BIOMED_RES	CAMBRIDGE	MA	Research Institutes	21421025	UNITED STATES	N	43556	43830	242	Other Research-Related	7/11/05 0:00	3/12/57 0:00	NIMH	130464	Private	FALSE	FALSE	NIMH	10065818	43910	PA-16-193	4R00MH113813-03	R00
NIDDK	8443043	7/26/13 0:00	PA-11-197	1K99DK094874-01A1	1	K99	DK	94874	1	A	HAFT CAROL R	8/1/13 0:00	7/31/14 0:00	Diabetes Endocrinology and Metabolic Diseases B Study Section[DDK-B]	9587550	1	INTERNAL MEDICINE/MEDICINE	68552207	L6NFUM28LQM5	68552207	L6NFUM28LQM5	US	38.664368	-90.323797	9083901	WASHINGTON_U	SAINT LOUIS	MO	SCHOOLS OF MEDICINE	631304862	UNITED STATES	N	41487	41851	847	Other Research-Related	7/5/05 0:00	5/29/46 0:00	NIDDK	90000	Private	TRUE	TRUE	NIDDK	8827465	41870	PA-11-197	4R00DK094874-02	R00
NIDDK	10283062	8/11/21	PA-20-188	1K99DK129712-01	1	K99	DK	129712	1		COOKE BRAD	8/11/21	7/31/22	Diabetes Endocrinology and Metabolic Diseases B Study Section[DDK-B]	11256546	12	GENETICS	71037113	LHGDNJMZ64Y1	71037113	LHGDNJMZ64Y1	US	40.763746	-73.955386	7056601	ROCKEFELLER_U	NEW YORK	NY	GRADUATE SCHOOLS	100656399	UNITED STATES	N	8/11/21	7/31/22	847	Other Research-Related	7/13/05 0:00	5/29/46 0:00	NIDDK	90000	Private	FALSE	FALSE	NIDDK	10675231	8/25/22	PA-20-188	4R00DK129712-03	R00
NIDDK	9026612	3/15/16 0:00	PA-14-042	5K99DK105203-02	5	K99	DK	105203	2		HAFT CAROL R	4/1/15 0:00	1/31/18 0:00	Diabetes Endocrinology and Metabolic Diseases B Study Section[DDK-B]	11124519	7	UnavaiLABle	76580745	DPMGH9MG1X67	76580745	DPMGH9MG1X67	US	42.337593	-71.108279	1464901	DANA-FARBER_CANCER_INST	BOSTON	MA	Independent Hospitals	22155450	UNITED STATES	N	42461	43131	847	Other Research-Related	7/8/05 0:00	5/29/46 0:00	NIDDK	90000	Private	FALSE	FALSE	NIDDK	9589025	43131	PA-14-042	4R00DK105203-03	R00
NIDCD	7496930	8/6/08 0:00	PA-07-297	5K99DC009280-02	5	K99	DC	9280	2			9/15/07 0:00	10/31/09 0:00	Communication Disorders Review Committee[CDRC]	6355246	7	MISCELLANEOUS	1425594	E2NYLCDML6V1	1425594	E2NYLCDML6V1	US	42.359128	-71.093339	4911501	MASSACHUSETTS_INST_OF_TECH	CAMBRIDGE	MA	ORGANIZED RESEARCH UNITS	21421029	UNITED STATES	N	39692	40117	173	Other Research-Related	6/30/05 0:00	8/14/62 0:00	NIDCD	95921	Private	FALSE	FALSE	NIDCD	7991970	40176		4R00DC009280-03	R00
NCI	9352812	8/16/17 0:00	PA-16-077	5K99CA212257-02	5	K99	CA	212257	2		SCHMIDT MICHAEL K	9/14/16 0:00	12/31/17 0:00	Transition to Independence Study Section (I)[NCI-I]	12035708	12	BIOLOGY	71037113	LHGDNJMZ64Y1	71037113	LHGDNJMZ64Y1	US	40.763746	-73.955386	7056601	ROCKEFELLER_U	NEW YORK	NY	GRADUATE SCHOOLS	100656399	UNITED STATES	N	42979	43100	398	Other Research-Related	7/9/05 0:00	6/13/77 0:00	NCI	137862	Private	FALSE	FALSE	NCI	9600331	43112	PA-16-077	4R00CA212257-03	R00
NINDS	7873506	4/2/10 0:00	PA-09-036	1K99NS069799-01	1	K99	NS	69799	1		MAMOUNAS LAURA	4/1/10 0:00	2/28/11 0:00	NST-2 Study Section [NST-2]	9528031	7	NEUROSCIENCES	1910777	FTMTDMBR29C7	1910777	FTMTDMBR29C7	US	39.325256	-76.605131	4134401	JOHNS_HOPKINS_U	BALTIMORE	MD	SCHOOLS OF MEDICINE	212182680	UNITED STATES	N	40269	40602	853	Other Research-Related	7/2/05 0:00	5/29/46 0:00	NINDS	90000	Private	TRUE	FALSE	NINDS	8215405	40596		4R00NS069799-02	R00
NHLBI	8833333	1/22/15 0:00	PA-11-197	5K99HL119567-02	5	K99	HL	119567	2		GALIS ZORINA S	4/4/14 0:00	2/29/16 0:00	ZHL1-CSR-P(F1)	8574157	5	INTERNAL MEDICINE/MEDICINE	66469933	S352L5PJLMP8	66469933	S352L5PJLMP8	US	33.791247	-84.3249	2384501	EMORY_U	ATLANTA	GA	SCHOOLS OF MEDICINE	303221007	UNITED STATES	N	42064	42429	837	Other Research-Related	7/7/05 0:00	7/3/69 0:00	NHLBI	98436	Private	TRUE	TRUE	NHLBI	9071989	42173	PA-11-197	4R00HL119567-03	R00
NHLBI	7511209	7/30/08 0:00	PA-07-297	1K99HL093219-01	1	K99	HL	93219	1		COMMARATO MICHAEL	8/1/08 0:00	7/31/09 0:00	ZHL1-CSR-S(M1)	9227559	5	BIOMEDICAL ENGINEERING	65391526	JJG6HU8PA4S5	65391526	JJG6HU8PA4S5	US	38.050527	-78.500531	1526402	U_OF_VIRGINIA	CHARLOTTESVILLE	VA	SCHOOLS OF MEDICINE	229044195	UNITED STATES	N	39661	40025	837	Other Research-Related	6/30/05 0:00	5/24/26 0:00	NHLBI	82690	public	TRUE	FALSE	NHLBI	7862651	40064	PA-06-036	4R00HL093219-02	R00
NINDS	8626456	1/20/14 0:00	PA-11-197	5K99NS082619-02	5	K99	NS	82619	2		GUBITZ AMELIE	3/1/13 0:00	2/28/15 0:00	NST-2 Study Section [NST-2]	9562289	3	PHYSIOLOGY	42250712	GM1XX56LEP58	42250712	GM1XX56LEP58	US	39.953462	-75.193983	6463801	U_OF_PENNSYLVANIA	PHILADELPHIA	PA	SCHOOLS OF MEDICINE	191046205	UNITED STATES	N	41699	42063	853	Other Research-Related	7/6/05 0:00	5/29/46 0:00	NINDS	90000	Private	FALSE	TRUE	NINDS	9189152	42402	PA-11-197	4R00NS082619-03	R00
NCI	8096656	6/21/11 0:00	PA-09-036	5K99CA149182-02	5	K99	CA	149182	2		SCHMIDT MICHAEL K	7/1/10 0:00	8/31/11 0:00	Institutional Training and Education Study Section (F)[NCI-F]	9231962	12	PATHOLOGY	73133571	GNJ7BBP73WE9	73133571	GNJ7BBP73WE9	US	42.275494	-83.743038	1506502	U_OF_MICHIGAN_AT_ANN_ARBOR	ANN ARBOR	MI	SCHOOLS OF MEDICINE	481091276	UNITED STATES	N	40725	40786	398	Other Research-Related	7/3/05 0:00	8/30/87 0:00	NCI	105068	Public	FALSE	FALSE	NCI	8318483	40787	PA-10-063	4R00CA149182-03	R00
NHLBI	9984887	8/7/20 0:00	PA-18-398	5K99HL148511-02	5	K99	HL	148511	2		HUANG LI-SHIN	8/1/19 0:00	1/31/21 0:00	NHLBI Mentored Transition to Independence Study Section[MTI(MA)]	12346337	13	INTERNAL MEDICINE/MEDICINE	621889815	QHF5ZZ114M72	621889815	QHF5ZZ114M72	US	40.8415	-73.9414	1833205	COLUMBIA_U_HEALTH_SCI	NEW YORK	NY	SCHOOLS OF MEDICINE	100323725	UNITED STATES	N	44044	44227	837	Other Research-Related	7/12/05 0:00	4/15/54 0:00	NHLBI	129402	Private	FALSE	TRUE	NHLBI	10308827	44228	PA-18-398	4R00HL148511-03	R00
NINDS	9781793	8/5/19 0:00	PA-16-193	5K99NS104215-02	5	K99	NS	104215	2		WHITTEMORE VICKY R	9/15/18 0:00	5/31/20 0:00	NST-2 Study Section [NST-2]	10406460	18	NEUROLOGY	9214214	HJD6G4D6TJY5	9214214	HJD6G4D6TJY5	US	37.426852	-122.17047	8046501	STANFORD_U	STANFORD	CA	SCHOOLS OF MEDICINE	943052004	UNITED STATES	N	43709	43982	853	Other Research-Related	7/11/05 0:00	1/23/38 0:00	NINDS	86952	Private	TRUE	FALSE	NINDS	10183009	44026	PA-16-193	4R00NS104215-03	R00
NIGMS	10106429	12/4/20	PA-19-130	1K99GM140249-01	1	K99	GM	140249	1		BARSKI OLEG	1/1/21	12/31/21	ZGM1-TWD-8(KR)	15350394	2	CHEMISTRY	9095365	LL8GLEVH6MG3	9095365	LL8GLEVH6MG3	US	40.764542	-111.850317	514002	U_OF_UTAH	SALT LAKE CITY	UT	SCHOOLS OF ARTS AND SCIENCES	841128906	UNITED STATES	N	1/1/21	12/31/21	859	Other Research-Related	7/13/05 0:00	10/14/73 0:00	NIGMS	100000	public	TRUE	FALSE	NIGMS	10661909	8/10/22	PA-19-130	4R00GM140249-02	R00
NIMH	7223582	12/26/06 0:00	PA-06-133	1K99MH079564-01	1	K99	MH	79564	1		CHURCHILL JAMES D	1/1/07 0:00	7/31/07 0:00	ZMH1-ERB-H(06)	7810653	7	PSYCHOLOGY	49435266	THL6A6JLE1S7	49435266	THL6A6JLE1S7	US	42.349594	-71.099726	10001093	BOSTON_U_(CHARLES_RIVER_CAMPUS)	BOSTON	MA	SCHOOLS OF ARTS AND SCIENCES	22151390	UNITED STATES	N	39083	39294	242	Other Research-Related	6/29/05 0:00	8/21/48 0:00	NIMH	54291	Private	TRUE	FALSE	NIMH	7502195	39695	PA-06-133	5R00MH079564-04	R00
NIMH	10225628	8/4/21	PA-19-130	5K99MH121518-02	5	K99	MH	121518	2		BECHTHOLT ANITA J	8/1/20	7/31/22	ZMH1-ERB-M(05)	11932348	1	RADIATION-DIAGNOSTIC/ONCOLOGY	68552207	L6NFUM28LQM5	68552207	L6NFUM28LQM5	US	38.664368	-90.323797	9083901	WASHINGTON_U	SAINT LOUIS	MO	SCHOOLS OF MEDICINE	631304862	UNITED STATES	N	8/1/21	7/31/22	242	Other Research-Related	7/13/05 0:00	1/23/12 0:00	NIMH	113979	Private	TRUE	TRUE	NIMH	10494331	8/12/22	PA-19-130	4R00MH121518-03	R00
NIAID	9385578	6/14/17 0:00	PA-16-193	1K99AI127932-01A1	1	K99	AI	127932	1	A	EICHELBERG KATRIN	7/1/17 0:00	1/21/18 0:00	Microbiology and Infectious Diseases Advisory Committee[MID]	11814871	12	GENETICS	71037113	LHGDNJMZ64Y1	71037113	LHGDNJMZ64Y1	US	40.763746	-73.955386	7056601	ROCKEFELLER_U	NEW YORK	NY	GRADUATE SCHOOLS	100656399	UNITED STATES	N	42917	43121	855	Other Research-Related	7/9/05 0:00	9/24/31 0:00	NIAID	121163	Private	FALSE	FALSE	NIAID	9599006	43119	PA-16-193	4R00AI127932-02	R00
NCI	9421372	2/17/17 0:00	PA-16-285	7K99CA201601-02	7	K99	CA	201601	2		RADAEV SERGEY	3/1/17 0:00	6/30/17 0:00	Transition to Independence Study Section (I)[NCI-I]	9297201	7	RADIATION-DIAGNOSTIC/ONCOLOGY	63690705	YND4PLMC9AN7	63690705	YND4PLMC9AN7	US	33.50591	-86.799772	1288803	U_OF_ALABAMA_AT_BIRMINGHAM	BIRMINGHAM	AL	SCHOOLS OF MEDICINE	352940001	UNITED STATES	N	42795	42916	398	Other Research-Related	7/9/05 0:00	1/10/62 0:00	NCI	95705	public	TRUE	FALSE	NCI	9514298	42943	PA-16-285	4R00CA201601-03	R00
NIMH	9748607	8/13/19 0:00	PA-16-193	5K99MH117229-02	5	K99	MH	117229	2		VAN'T VEER ASHLEE V	8/1/18 0:00	9/30/20 0:00	ZMH1-ERB-M(06)	10721658	8	UnavaiLABle	73130411	FLJ7DQKLL226	73130411	FLJ7DQKLL226	US	42.363198	-71.068772	4907701	MASSACHUSETTS_GENERAL_HOSP	BOSTON	MA	Independent Hospitals	21142621	UNITED STATES	N	43678	44104	242	Other Research-Related	7/11/05 0:00	1/1/60 0:00	NIMH	131489	Private	TRUE	TRUE	NIMH	10240929	44077	PA-16-193	4R00MH117229-03	R00
NIGMS	10224921	7/28/21	PA-19-130	5K99GM135537-02	5	K99	GM	135537	2		SESMA MICHAEL A	8/1/20	1/31/22	ZGM1-TWD-9(KR)	9543422	3	BIOCHEMISTRY	43207562	FL6GV84CKN57	43207562	FL6GV84CKN57	US	41.310925	-72.926428	9420201	YALE_U	NEW HAVEN	CT	SCHOOLS OF MEDICINE	65208327	UNITED STATES	N	8/1/21	1/31/22	859	Other Research-Related	7/13/05 0:00	6/20/32 0:00	NIGMS	48385	Private	FALSE	FALSE	NIGMS	10544202	1/31/22	PA-19-130	4R00GM135537-03	R00
NIDA	9121511	11/15/16 0:00	PA-14-042	5K99DA040154-02	5	K99	DA	40154	2		LIN YU	9/30/15 0:00	8/31/18 0:00	ZDA1-HXO-H(05)S	9108667	18	ANESTHESIOLOGY	9214214	HJD6G4D6TJY5	9214214	HJD6G4D6TJY5	US	37.426852	-122.17047	8046501	STANFORD_U	STANFORD	CA	SCHOOLS OF MEDICINE	943052004	UNITED STATES	N	42705	43343	279	Other Research-Related	7/9/05 0:00	8/21/78 0:00	NIDA	174820	Private	TRUE	FALSE	NIDA	9736938	43326	PA-14-042	4R00DA040154-03	R00
NIA	9353285	42867	PA-15-083	5K99AG056054-02	5	K99	AG	56054	2		ANDERSON DALLAS	42643	43251	Nursing Science Review Committee[NRRC(65)]	10520314	12	NONE	3403953	NPM2J7MSCF61	3403953	NPM2J7MSCF61	US	40.870717	-77.83415	1524202	PENNSYLVANIA_STATE	UNIVERSITY PARK	PA	SCHOOLS OF NURSING	168027000	UNITED STATES	N	42887	43251	866	Other Research-Related	2017	96066	NIA	96066	Public	FALSE	FALSE	NIA	9769210	43353	PA-15-083	4R00AG056054-03	R00
NIAAA	10152353	5/12/21	PA-19-130	5K99AA028256-02	5	K99	AA	28256	2		BLOSS GREGORY	5/1/20	4/30/22	ZAA1-AA(02)	14641941	12	PUBLIC HEALTH & PREV MEDICINE	94878337	KMH5K9V7S518	94878337	KMH5K9V7S518	US	37.767442	-122.413937	577508	U_OF_CALIFORNIA_SAN_FRANCISCO	SAN FRANCISCO	CA	SCHOOLS OF MEDICINE	941432510	UNITED STATES	N	5/1/21	4/30/22	273	Other Research-Related	7/13/05 0:00	4/27/68 0:00	NIAAA	171052	public	FALSE	FALSE	NIAAA	10557262	5/17/22	PA-19-130	4R00AA028256-03	R00
NHLBI	9997700	9/23/20 0:00	PA-18-398	5K99HL145094-02	5	K99	HL	145094	2		LU QING	9/1/19 0:00	8/31/22 0:00	NHLBI Mentored Transition to Independence Study Section[MTI(MA)]	14323402	12	ANATOMY/CELL BIOLOGY	94878337	KMH5K9V7S518	94878337	KMH5K9V7S518	US	37.767442	-122.413937	577508	U_OF_CALIFORNIA_SAN_FRANCISCO	SAN FRANCISCO	CA	SCHOOLS OF DENTISTRY/ORAL HYGN	941432510	UNITED STATES	N	44075	44804	838	Other Research-Related	7/12/05 0:00	2/1/02 0:00	NHLBI	110336	public	TRUE	FALSE	NHLBI	10556904	8/9/22	PA-18-398	4R00HL145094-03	R00
NICHD	9572404	7/16/18 0:00	PA-16-193	5K99HD093858-02	5	K99	HD	93858	2		HALVORSON LISA M	9/25/17 0:00	7/31/19 0:00	Reproduction Andrology and Gynecology Study Section[CHHD-R]	14154181	18	ANESTHESIOLOGY	9214214	HJD6G4D6TJY5	9214214	HJD6G4D6TJY5	US	37.426852	-122.17047	8046501	STANFORD_U	STANFORD	CA	SCHOOLS OF MEDICINE	943052004	UNITED STATES	N	43313	43677	865	Other Research-Related	7/10/05 0:00	10/23/45 0:00	NICHD	126306	Private	FALSE	FALSE	NICHD	9936639	43675	PA-16-193	4R00HD093858-03	R00
NHLBI	9950569	4/29/20 0:00	PA-19-130	1K99HL151750-01	1	K99	HL	151750	1		YANG YU-CHUNG	5/1/20 0:00	5/31/21 0:00	NHLBI Mentored Transition to Independence Study Section[MTI(JA)]	15306845	8	UnavaiLABle	73130411	FLJ7DQKLL226	73130411	FLJ7DQKLL226	US	42.363198	-71.068772	4907701	MASSACHUSETTS_GENERAL_HOSP	BOSTON	MA	Independent Hospitals	21142621	UNITED STATES	N	43952	44347	839	Other Research-Related	7/12/05 0:00	5/18/68 0:00	NHLBI	171073	Private	FALSE	FALSE	NHLBI	10383858	##########	PA-19-130	4R00HL151750-02	R00
AHRQ	8687683	6/13/14 0:00	RFA-HS-13-002	5K99HS022431-02	5	K99	HS	22431	2		WILLIS TAMARA	7/1/13 0:00	8/31/14 0:00	ZHS1-HSR-C(01)	11399904	30	UnavaiLABle	145745022	J1G9CV11VCN7	145745022	J1G9CV11VCN7	US	32.792138	-96.784998	2915302	BAYLOR_RES_INST	DALLAS	TX	Research Institutes	75204	UNITED STATES	N	41821	41882	226	Other Research-Related	7/6/05 0:00	3/20/66 0:00	AHRQ	24186	Private	FALSE	FALSE	AHRQ	8875921	41873	RFA-HS-13-002	4R00HS022431-03	R00
NINR	8448067	41500	PA-11-197	5K99NR013548-02	5	K99	NR	13548	2		ROARY MARY	41122	41851	Nursing Science Review Committee[NRRC(52)]	8797810	3	FAMILY MEDICINE	42250712	GM1XX56LEP58	42250712	GM1XX56LEP58	US	39.953462	-75.193983	6463801	U_OF_PENNSYLVANIA	PHILADELPHIA	PA	SCHOOLS OF MEDICINE	191046205	UNITED STATES	N	41503	41851	361	Other Research-Related	2013	60150	NINR	60150	Private	FALSE	TRUE	NINR	8875870	41876	PA-11-197	4R00NR013548-03	R00
NIMH	9431595	42996	PA-16-193	1K99MH115165-01	1	K99	MH	115165	1		VAN'T VEER ASHLEE V	42996	43343	ZMH1-ERB-X(06)	10996019	4	PSYCHIATRY	608195277	D3LHU66KBLD5	608195277	D3LHU66KBLD5	US	35.9316	-79.057377	578206	U_OF_NORTH_CAROLINA_CHAPEL_HILL	CHAPEL HILL	NC	SCHOOLS OF MEDICINE	275995023	UNITED STATES	N	42996	43343	242	Other Research-Related	2017	100216	NIMH	100216	Public	FALSE	FALSE	NIMH	9741912	43328	PA-16-193	4R00MH115165-02	R00
NCI	7474716	8/1/08 0:00	PA-06-133	5K99CA126147-02	5	K99	CA	126147	2		SCHMIDT MICHAEL K	8/1/07 0:00	7/31/09 0:00	ZCA1-RTRB-A(O1)	8576491	8	UnavaiLABle	73130411	FLJ7DQKLL226	73130411	FLJ7DQKLL226	US	42.363198	-71.068772	4907701	MASSACHUSETTS_GENERAL_HOSP	BOSTON	MA	Independent Hospitals	21142621	UNITED STATES	N	39675	40025	398	Other Research-Related	6/30/05 0:00	3/15/89 0:00	NCI	142155	Private	TRUE	TRUE	NCI	7887003	40023	PA-06-133	4R00CA126147-03	R00
NCI	7469587	5/28/08 0:00	PA-06-133	5K99CA129070-02	5	K99	CA	129070	2		SCHMIDT MICHAEL K	7/13/07 0:00	6/30/09 0:00	ZCA1-RTRB-A(M1)	8683425	8	UnavaiLABle	73130411	FLJ7DQKLL226	73130411	FLJ7DQKLL226	US	42.363198	-71.068772	4907701	MASSACHUSETTS_GENERAL_HOSP	BOSTON	MA	Independent Hospitals	21142621	UNITED STATES	N	39630	39994	398	Other Research-Related	6/30/05 0:00	2/4/88 0:00	NCI	141750	Private	TRUE	TRUE	NCI	7849163	40009	PA-06-133	4R00CA129070-03	R00
NHLBI	8045363	3/2/11 0:00	PA-09-036	5K99HL098461-02	5	K99	HL	98461	2		CARLSON DREW E	3/15/10 0:00	2/29/12 0:00	ZHL1-CSR-Z(O2)	9335134	7	UnavaiLABle	30811269	QN6MS4VN7BD1	30811269	QN6MS4VN7BD1	US	42.336107	-71.107481	1080401	BRIGHAM_&_WOMENS_HOSP	BOSTON	MA	Independent Hospitals	21156110	UNITED STATES	N	40603	40968	837	Other Research-Related	7/3/05 0:00	12/26/74 0:00	NHLBI	136962	Private	TRUE	TRUE	NHLBI	8528025	41138	PA-11-197	4R00HL098461-03	R00
NIAID	7246038	4/5/07 0:00	PA-06-133	1K99AI073457-01	1	K99	AI	73457	1		PROGRAIS LAWRENCE J	4/15/07 0:00	3/31/08 0:00	Allergy Immunology and Transplantation Research Committee[AITC]	8662677	7	UnavaiLABle	73130411	FLJ7DQKLL226	73130411	FLJ7DQKLL226	US	42.363198	-71.068772	4907701	MASSACHUSETTS_GENERAL_HOSP	BOSTON	MA	Independent Hospitals	21142621	UNITED STATES	N	39187	39538	855	Other Research-Related	6/29/05 0:00	5/28/46 0:00	NIAID	89999	Private	TRUE	TRUE	NIAID	7579421	39562		4R00AI073457-02	R00
NCI	8734351	8/11/14 0:00	PA-11-197	5K99CA175293-02	5	K99	CA	175293	2		SCHMIDT MICHAEL K	9/13/13 0:00	8/31/15 0:00	Transition to Independence Study Section (I)[NCI-I]	9709496	7	UnavaiLABle	120989983	C186U32QSBR9	120989983	C186U32QSBR9	US	42.363037	-71.08963	1742101	WHITEHEAD_INST_FOR_BIOMED_RES	CAMBRIDGE	MA	Research Institutes	21421025	UNITED STATES	N	41883	42247	398	Other Research-Related	7/6/05 0:00	9/25/14 0:00	NCI	114955	Private	FALSE	FALSE	NCI	9182262	42411	PA-11-197	4R00CA175293-03	R00
NICHD	9453004	3/17/18 0:00	PA-16-193	5K99HD091381-02	5	K99	HD	91381	2		WINER KAREN	4/1/17 0:00	9/29/19 0:00	Reproduction Andrology and Gynecology Study Section[CHHD-R]	11034806	7	UnavaiLABle	30811269	QN6MS4VN7BD1	30811269	QN6MS4VN7BD1	US	42.336107	-71.107481	1080401	BRIGHAM_&_WOMENS_HOSP	BOSTON	MA	Independent Hospitals	21156110	UNITED STATES	N	43191	43737	865	Other Research-Related	7/10/05 0:00	4/23/73 0:00	NICHD	136350	Private	TRUE	TRUE	NICHD	10021765	43734	PA-16-193	4R00HD091381-03	R00
NIMH	8894619	6/23/15 0:00	PA-11-197	5K99MH104712-02	5	K99	MH	104712	2		DESMOND NANCY L	7/18/14 0:00	6/30/16 0:00	ZMH1-ERB-L(03)	8840908	12	PHARMACOLOGY	60217502	YNT8TCJH8FQ8	60217502	YNT8TCJH8FQ8	US	40.7607	-73.9603	1514803	WEILL_MED_COLL_OF_CORNELL_U	NEW YORK	NY	SCHOOLS OF MEDICINE	100654805	UNITED STATES	N	42186	42551	242	Other Research-Related	7/7/05 0:00	5/29/46 0:00	NIMH	90000	Private	FALSE	FALSE	NIMH	9318801	42604	PA-11-197	4R00MH104712-03	R00
NEI	8927649	42243	PA-11-197	5K99EY024653-02	5	K99	EY	24653	2		AGARWAL NEERAJ	41912	42978	ZEY1-VSN(02)	11036673	10	BIOLOGY	49179401	F4N1QNPB95M4	49179401	F4N1QNPB95M4	US	40.81207	-73.954377	1833202	COLUMBIA_U_NEW_YORK_MORNINGSIDE	NEW YORK	NY	GRADUATE SCHOOLS	100276900	UNITED STATES	N	42248	42978	867	Other Research-Related	2015	119880	NEI	119880	Private	FALSE	FALSE	NEI	10311194	##########	PA-11-197	4R00EY024653-03	R00
NCI	9308912	6/20/17 0:00	PA-15-083	5K99CA207744-02	5	K99	CA	207744	2		RADAEV SERGEY	7/1/16 0:00	6/30/18 0:00	Transition to Independence Study Section (I)[NCI-I]	11873757	8	UnavaiLABle	73130411	FLJ7DQKLL226	73130411	FLJ7DQKLL226	US	42.363198	-71.068772	4907701	MASSACHUSETTS_GENERAL_HOSP	BOSTON	MA	Independent Hospitals	21142621	UNITED STATES	N	42917	43281	398	Other Research-Related	7/9/05 0:00	11/6/90 0:00	NCI	179280	Private	TRUE	TRUE	NCI	9684715	43265	PA-15-083	4R00CA207744-03	R00
NICHD	10267659	9/22/20 0:00	PA-16-193	5K99HD096108-03	5	K99	HD	96108	3		RAVINDRANATH NEELAKANTA	8/1/18 0:00	3/17/22 0:00	Reproduction Andrology and Gynecology Study Section[CHHD-R]	10994132	13	BIOCHEMISTRY	124726725	GS3YEVSS12N6	124726725	GS3YEVSS12N6	US	37.870017	-122.268624	577502	U_OF_CALIFORNIA_BERKELEY	BERKELEY	CA	SCHOOLS OF ARTS AND SCIENCES	947101749	UNITED STATES	N	44044	44637	865	Other Research-Related	7/12/05 0:00	8/26/87 0:00	NICHD	68540	public	FALSE	FALSE	NICHD	10550023	3/18/22	PA-16-193	4R00HD096108-04	R00
NIAID	10211127	6/11/21	PA-19-130	5K99AI147029-02	5	K99	AI	147029	2		BOZICK BROOKE ALLISON	7/6/20	3/31/22	Microbiology and Infectious Diseases Advisory Committee[MID]	11628247	7	UnavaiLABle	78200995	HMSNCM57QNR5	78200995	HMSNCM57QNR5	US	47.627342	-122.331593	861001	FRED_HUTCHINSON_CANCER_RES_CTR	SEATTLE	WA	Research Institutes	981094433	UNITED STATES	N	7/1/21	3/31/22	855	Other Research-Related	7/13/05 0:00	2/15/60 0:00	NIAID	95010	Private	FALSE	FALSE	NIAID	10659289	8/22/22	PA-19-130	4R00AI147029-04	R00
NIGMS	7514059	7/4/08 0:00	PA-07-297	1K99GM085212-01	1	K99	GM	85212	1		CARTER ANTHONY D	7/4/08 0:00	5/31/09 0:00	ZGM1-BRT-9(KR)	8019149	9	INTERNAL MEDICINE/MEDICINE	800772139	S3GMKS8ELA16	800772139	S3GMKS8ELA16	US	29.706319	-95.397195	578407	U_OF_TX_MD_ANDERSON_CAN_CTR	HOUSTON	TX	OVERALL MEDICAL	770304009	UNITED STATES	N	39633	39964	859	Other Research-Related	6/30/05 0:00	5/29/46 0:00	NIGMS	90000	Public	FALSE	FALSE	NIGMS	7845369	39965	PA-07-297	4R00GM085212-02	R00
NICHD	10393115	6/11/21	PA-20-272	3K99HD098918-02S1	3	K99	HD	98918	2	S	TOYAMA REIKO	6/1/19	12/31/21		14374924	7	BIOLOGY	47006379	JDLVAVGYJQ21	47006379	JDLVAVGYJQ21	US	42.335672	-71.104237	3212902	HARVARD_MED_SCH	BOSTON	MA	SCHOOLS OF MEDICINE	21201616	UNITED STATES	N	6/1/21	12/31/21	865	Other Research-Related	7/13/05 0:00	10/14/39 0:00	NICHD	51057	Private	FALSE	FALSE	NICHD	10547914	1/20/22	PA-18-398	4R00HD098918-03	R00
NIDCD	7496603	8/8/08 0:00	PA-07-297	5K99DC009279-02	5	K99	DC	9279	2		SKLARE DAN	9/15/07 0:00	9/3/09 0:00	Communication Disorders Review Committee[CDRC]	8745446	7	MICROBIOLOGY/IMMUN/VIROLOGY	188435911	Z9CRZKD42ZT1	188435911	Z9CRZKD42ZT1	US	39.292248	-76.625629	820104	U_OF_MARYLAND_BALTIMORE	BALTIMORE	MD	SCHOOLS OF DENTISTRY/ORAL HYGN	212011508	UNITED STATES	N	39692	40059	173	Other Research-Related	6/30/05 0:00	9/9/95 0:00	NIDCD	108000	public	FALSE	FALSE	NIDCD	7922802	40077	PA-07-297	4R00DC009279-03	R00
NIGMS	7534784	11/6/08 0:00	PA-07-297	5K99GM083145-02	5	K99	GM	83145	2		CARTER ANTHONY D	12/1/07 0:00	11/30/09 0:00	ZGM1-BRT-9(KR)	7889178	7	GENETICS	605799469	HD1WMN6945W6	605799469	HD1WMN6945W6	US	47.660307	-122.315168	9087701	U_OF_WASHINGTON	SEATTLE	WA	SCHOOLS OF MEDICINE	981959472	UNITED STATES	N	39783	40147	859	Other Research-Related	7/1/05 0:00	9/21/41 0:00	NIGMS	88289	Public	TRUE	FALSE	NIGMS	7996702	40182	PA-06-133	4R00GM083145-03	R00
NHLBI	8066615	4/21/11 0:00	PA-09-036	5K99HL098364-02	5	K99	HL	98364	2		CARLSON DREW E	5/3/10 0:00	4/30/12 0:00	ZHL1-CSR-Z(O2)	9758860	8	UnavaiLABle	73130411	FLJ7DQKLL226	73130411	FLJ7DQKLL226	US	42.363198	-71.068772	4907701	MASSACHUSETTS_GENERAL_HOSP	BOSTON	MA	Independent Hospitals	21142621	UNITED STATES	N	40664	41029	837	Other Research-Related	7/3/05 0:00	9/29/77 0:00	NHLBI	137970	Private	TRUE	FALSE	NHLBI	8464344	41136	PA-10-063	4R00HL098364-03	R00
NIDDK	7497149	8/27/08 0:00	PA-07-297	5K99DK080643-02	5	K99	DK	80643	2		HOSHIZAKI DEBORAH K	9/20/07 0:00	5/14/09 0:00	Kidney Urologic and Hematologic Diseases D Study Section[DDK-D]	7795588	1	MICROBIOLOGY/IMMUN/VIROLOGY	68552207	L6NFUM28LQM5	68552207	L6NFUM28LQM5	US	38.664368	-90.323797	9083901	WASHINGTON_U	SAINT LOUIS	MO	SCHOOLS OF MEDICINE	631304862	UNITED STATES	N	39692	39947	849	Other Research-Related	6/30/05 0:00	4/27/29 0:00	NIDDK	83759	Private	TRUE	TRUE	NIDDK	7743144	39948	PA-07-297	4R00DK080643-03	R00
NIDCD	8401139	11/23/12 0:00	PA-10-063	5K99DC012065-02	5	K99	DC	12065	2		SKLARE DAN	12/16/11 0:00	11/30/13 0:00	Communication Disorders Review Committee[CDRC]	10793375	7	BIOLOGY	47006379	JDLVAVGYJQ21	47006379	JDLVAVGYJQ21	US	42.335672	-71.104237	3212902	HARVARD_MED_SCH	BOSTON	MA	SCHOOLS OF MEDICINE	21201616	UNITED STATES	N	41244	41608	173	Other Research-Related	7/5/05 0:00	4/18/39 0:00	NIDCD	87402	Private	FALSE	FALSE	NIDCD	8853401	41807	PA-10-063	4R00DC012065-03	R00
NICHD	8585076	12/13/13 0:00	PA-11-197	5K99HD071970-02	5	K99	HD	71970	2		LAMAR CHARISEE A	12/1/12 0:00	11/30/14 0:00	Reproduction Andrology and Gynecology Study Section[CHHD-R]	10924831	7	UnavaiLABle	30811269	QN6MS4VN7BD1	30811269	QN6MS4VN7BD1	US	42.336107	-71.107481	1080401	BRIGHAM_&_WOMENS_HOSP	BOSTON	MA	Independent Hospitals	21156110	UNITED STATES	N	41609	41973	865	Other Research-Related	7/6/05 0:00	9/20/75 0:00	NICHD	137230	Private	TRUE	TRUE	NICHD	8962241	41970	PA-11-197	4R00HD071970-03	R00
NCI	9126456	7/8/16 0:00	PA-14-042	5K99CA187192-02	5	K99	CA	187192	2		RADAEV SERGEY	8/13/15 0:00	7/31/17 0:00	Transition to Independence Study Section (I)[NCI-I]	11213393	18	INTERNAL MEDICINE/MEDICINE	9214214	HJD6G4D6TJY5	9214214	HJD6G4D6TJY5	US	37.426852	-122.17047	8046501	STANFORD_U	STANFORD	CA	SCHOOLS OF MEDICINE	943052004	UNITED STATES	N	42583	42947	398	Other Research-Related	7/8/05 0:00	4/23/68 0:00	NCI	171048	Private	FALSE	TRUE	NCI	9513122	42943	PA-14-042	4R00CA187192-03	R00
NHLBI	8029302	2/3/11 0:00	PA-10-063	1K99HL105791-01	1	K99	HL	105791	1		ROLTSCH MARK	2/4/11 0:00	1/31/13 0:00	ZHL1-CSR-Z(O1)	10242707	2	GENETICS	603847393	MQE2JHHJW9Q8	603847393	MQE2JHHJW9Q8	US	42.2802	-71.758245	850903	U_OF_MASSACHUSETTS_MED_SCH_WORCESTER	WORCESTER	MA	SCHOOLS OF MEDICINE	16550002	UNITED STATES	N	40578	40939	837	Other Research-Related	7/3/05 0:00	8/31/38 0:00	NHLBI	87172	Public	FALSE	FALSE	NHLBI	8458365	41138		4R00HL105791-02	R00
NCI	8766030	7/24/14 0:00	PA-11-197	1K99CA188293-01	1	K99	CA	188293	1		SCHMIDT MICHAEL K	9/1/14 0:00	8/31/15 0:00	Transition to Independence Study Section (I)[NCI-I]	11985342	12	PATHOLOGY	121911077	M5SZJ6VHUHN8	121911077	M5SZJ6VHUHN8	US	40.669895	-73.974354	5998304	NEW_YORK_U_SCH_OF_MED	NEW YORK	NY	SCHOOLS OF MEDICINE	10016	UNITED STATES	N	41883	42247	398	Other Research-Related	7/6/05 0:00	5/29/46 0:00	NCI	90000	Private	FALSE	FALSE	NCI	9148434	42272	PA-11-197	4R00CA188293-02	R00
NIBIB	8719100	7/31/14 0:00	PA-11-197	5K99EB015445-02	5	K99	EB	15445	2		ERIM ZEYNEP	8/15/13 0:00	7/31/15 0:00	ZEB1-OSR-B(M2)	11119767	8	UnavaiLABle	73130411	FLJ7DQKLL226	73130411	FLJ7DQKLL226	US	42.363198	-71.068772	4907701	MASSACHUSETTS_GENERAL_HOSP	BOSTON	MA	Independent Hospitals	21142621	UNITED STATES	N	41852	42216	286	Other Research-Related	7/6/05 0:00	5/29/46 0:00	NIBIB	90000	Private	TRUE	TRUE	NIBIB	9109294	42251	PA-11-197	4R00EB015445-03	R00
NICHD	10106139	4/6/21	PA-19-130	1K99HD103954-01	1	K99	HD	103954	1		DAVIS MAURICE	4/6/21	3/31/23	Obstetrics and Maternal-Fetal Biology Study Section[CHHD-B]	15825323	1	RADIATION-DIAGNOSTIC/ONCOLOGY	68552207	L6NFUM28LQM5	68552207	L6NFUM28LQM5	US	38.664368	-90.323797	9083901	WASHINGTON_U	SAINT LOUIS	MO	SCHOOLS OF MEDICINE	631304862	UNITED STATES	N	4/6/21	3/31/22	865	Other Research-Related	2021	127701	NICHD	127701	Private	FALSE	TRUE	NICHD	10633746	9/15/22	PA-19-130	4R00HD103954-03	R00
NIA	9901421	3/12/20 0:00	PA-18-398	5K99AG062230-02	5	K99	AG	62230	2		LUO YUAN	4/1/19 0:00	3/31/21 0:00	Basic Neuroscience of Aging Study Section[NIA-N]	14584766	7	RADIATION-DIAGNOSTIC/ONCOLOGY	1910777	FTMTDMBR29C7	1910777	FTMTDMBR29C7	US	39.325256	-76.605131	4134401	JOHNS_HOPKINS_U	BALTIMORE	MD	SCHOOLS OF MEDICINE	212182680	UNITED STATES	N	43922	44286	866	Other Research-Related	7/12/05 0:00	9/4/34 0:00	NIA	85715	Private	TRUE	TRUE	NIA	10360721	44295	PA-18-398	4R00AG062230-03	R00
NHLBI	10136714	4/8/21	PA-19-130	5K99HL151965-02	5	K99	HL	151965	2		WHITE MARQUITTA JONISSE	4/1/20	8/31/21	NHLBI Mentored Transition to Independence Study Section[MTI(JA)]	12625931	5	PEDIATRICS	66469933	S352L5PJLMP8	66469933	S352L5PJLMP8	US	33.791247	-84.3249	2384501	EMORY_U	ATLANTA	GA	SCHOOLS OF MEDICINE	303221007	UNITED STATES	N	4/1/21	8/31/21	838	Other Research-Related	7/13/05 0:00	8/20/88 0:00	NHLBI	105424	Private	TRUE	TRUE	NHLBI	10445444	44414	PA-19-130	4R00HL151965-03	R00
NINDS	9462239	8/13/18 0:00	PA-16-193	5K99NS101057-02	5	K99	NS	101057	2		MAMOUNAS LAURA	9/1/17 0:00	12/31/18 0:00	NST-2 Study Section [NST-2]	10589178	7	BIOLOGY	47006379	JDLVAVGYJQ21	47006379	JDLVAVGYJQ21	US	42.335672	-71.104237	3212902	HARVARD_MED_SCH	BOSTON	MA	SCHOOLS OF MEDICINE	21201616	UNITED STATES	N	43344	43465	853	Other Research-Related	7/10/05 0:00	5/9/43 0:00	NINDS	88884	Private	FALSE	FALSE	NINDS	9836951	43559	PA-16-193	4R00NS101057-03	R00
NIMH	10011534	3/13/20 0:00	PA-19-129	1K99MH121166-01A1	1	K99	MH	121166	1	A	GREENWOOD GREGORY	4/1/20 0:00	3/31/22 0:00	ZMH1-ERB-M(02)	14235066	7	PUBLIC HEALTH & PREV MEDICINE	605799469	HD1WMN6945W6	605799469	HD1WMN6945W6	US	47.660307	-122.315168	9087701	U_OF_WASHINGTON	SEATTLE	WA	SCHOOLS OF MEDICINE	981959472	UNITED STATES	N	43922	44286	242	Other Research-Related	7/12/05 0:00	11/28/33 0:00	OD	60549	Public	FALSE	FALSE	NIMH	10600294	##########	PA-19-129	6R00MH121166-04	R00
NCI	8929198	8/11/15 0:00	PA-14-042	5K99CA190861-02	5	K99	CA	190861	2		SCHMIDT MICHAEL K	9/18/14 0:00	8/31/17 0:00	Transition to Independence Study Section (I)[NCI-I]	12106030	7	UnavaiLABle	76580745	DPMGH9MG1X67	76580745	DPMGH9MG1X67	US	42.337593	-71.108279	1464901	DANA-FARBER_CANCER_INST	BOSTON	MA	Independent Hospitals	22155450	UNITED STATES	N	42248	42978	398	Other Research-Related	7/7/05 0:00	8/8/68 0:00	NCI	98107	Private	TRUE	FALSE	NCI	9567636	43003	PA-14-042	4R00CA190861-03	R00
NHGRI	10262950	8/24/21	PA-19-130	5K99HG010905-02	5	K99	HG	10905	2		BOYER JOY	9/11/20	8/31/22	Genome Research Study Section[GNOM-G]	12417669	3	INTERNAL MEDICINE/MEDICINE	42250712	GM1XX56LEP58	42250712	GM1XX56LEP58	US	39.953462	-75.193983	6463801	U_OF_PENNSYLVANIA	PHILADELPHIA	PA	SCHOOLS OF MEDICINE	191046205	UNITED STATES	N	9/1/21	8/31/22	172	Other Research-Related	7/13/05 0:00	3/19/84 0:00	NHGRI	103809	Private	TRUE	FALSE	NHGRI	10700303	9/21/22	PA-19-130	4R00HG010905-03	R00
NCI	7686725	8/12/09 0:00	PA-07-297	5K99CA137167-02	5	K99	CA	137167	2		SCHMIDT MICHAEL K	9/12/08 0:00	8/31/11 0:00	Institutional Training and Education Study Section (F)[NCI-F]	7902770	8	UnavaiLABle	73130411	FLJ7DQKLL226	73130411	FLJ7DQKLL226	US	42.363198	-71.068772	4907701	MASSACHUSETTS_GENERAL_HOSP	BOSTON	MA	Independent Hospitals	21142621	UNITED STATES	N	40057	40786	398	Other Research-Related	7/1/05 0:00	4/24/90 0:00	NCI	142560	Private	TRUE	TRUE	NCI	8318477	40785	PA-11-197	4R00CA137167-03	R00
NIMH	7296224	9/11/07 0:00	PA-06-133	1K99MH080852-01	1	K99	MH	80852	1		CHURCHILL JAMES D	9/11/07 0:00	6/30/08 0:00	ZMH1-ERB-H(04)	8779357	7	BIOLOGY	47006379	JDLVAVGYJQ21	47006379	JDLVAVGYJQ21	US	42.335672	-71.104237	3212902	HARVARD_MED_SCH	BOSTON	MA	SCHOOLS OF MEDICINE	21201616	UNITED STATES	N	39336	39629	242	Other Research-Related	6/29/05 0:00	2/10/38 0:00	NIMH	86970	Private	FALSE	FALSE	NIMH	7664201	39714	PA-07-297	4R00MH080852-02	R00
NHLBI	7384653	12/19/07 0:00	PA-06-133	1K99HL088372-01A1	1	K99	HL	88372	1	A	COMMARATO MICHAEL	2/1/08 0:00	1/31/09 0:00	ZHL1-CSR-S(O1)	8671612	7	PUBLIC HEALTH & PREV MEDICINE	149617367	UNVDZNFA8R29	149617367	UNVDZNFA8R29	US	42.335306	-71.102775	3212904	HARVARD_SCH_OF_PUBLIC_HEALTH	BOSTON	MA	SCHOOLS OF PUBLIC HEALTH	21156028	UNITED STATES	N	39479	39844	837	Other Research-Related	6/30/05 0:00	5/29/46 0:00	NHLBI	90000	Private	FALSE	FALSE	NHLBI	7760733	39898		4R00HL088372-02	R00
NINR	8743828	7/17/14 0:00	PA-11-197	5K99NR014675-02	5	K99	NR	14675	2		TULLY LOIS	9/27/13 0:00	7/31/15 0:00	Nursing Science Review Committee[NRRC(57)]	8799094	3	NEUROSCIENCES	42250712	GM1XX56LEP58	42250712	GM1XX56LEP58	US	39.953462	-75.193983	6463801	U_OF_PENNSYLVANIA	PHILADELPHIA	PA	SCHOOLS OF MEDICINE	191046205	UNITED STATES	N	41852	42216	361	Other Research-Related	7/6/05 0:00	8/2/45 0:00	NINR	89700	Private	FALSE	FALSE	NINR	9115758	42249	PA-11-197	4R00NR014675-03	R00
NIA	9340058	5/12/17 0:00	PA-15-083	5K99AG052830-02	5	K99	AG	52830	2		WAGSTER MOLLY V	9/1/16 0:00	8/31/18 0:00	Behavior and Social Science of Aging Study Section[NIA-S]	10753709	4	PUBLIC HEALTH & PREV MEDICINE	608195277	D3LHU66KBLD5	608195277	D3LHU66KBLD5	US	35.9316	-79.057377	578206	U_OF_NORTH_CAROLINA_CHAPEL_HILL	CHAPEL HILL	NC	SCHOOLS OF PUBLIC HEALTH	275995023	UNITED STATES	N	42887	43343	866	Other Research-Related	7/9/05 0:00	4/20/01 0:00	NIA	73525	Public	FALSE	FALSE	NIA	9952723	43668	PA-15-083	4R00AG052830-03	R00
NCI	9520155	7/13/18 0:00	PA-16-193	5K99CA218731-02	5	K99	CA	218731	2		SCHMIDT MICHAEL K	8/1/17 0:00	7/31/19 0:00	Transition to Independence Study Section (I)[NCI-I]	12306982	33	MICROBIOLOGY/IMMUN/VIROLOGY	92530369	RN64EPNH8JC6	92530369	RN64EPNH8JC6	US	34.070199	-118.45102	577505	U_OF_CALIFORNIA_LOS_ANGELES	LOS ANGELES	CA	SCHOOLS OF MEDICINE	900952000	UNITED STATES	N	43313	43677	398	Other Research-Related	7/10/05 0:00	8/11/52 0:00	NCI	128790	Public	FALSE	FALSE	NCI	9979019	43706	PA-16-193	4R00CA218731-03	R00
NIGMS	10240974	9/11/20 0:00	PA-16-193	3K99GM129412-02S1	3	K99	GM	129412	2	S	KEANE-MYERS ANDREA	9/7/18 0:00	8/31/21 0:00	ZGM1-TWD-8(KR)	14479659	3	BIOCHEMISTRY	43207562	FL6GV84CKN57	43207562	FL6GV84CKN57	US	41.310925	-72.926428	9420201	YALE_U	NEW HAVEN	CT	SCHOOLS OF MEDICINE	65208327	UNITED STATES	N	43709	44439	859	Other Research-Related	7/12/05 0:00	11/7/54 0:00	NIGMS	20035	Private	FALSE	FALSE	NIGMS	10458270	##########	PA-16-193	4R00GM129412-03	R00
NLM	9884791	43944	PA-18-398	5K99LM012992-02	5	K99	LM	12992	2		VANBIERVLIET ALAN	43528	44620	ZLM1-YW-C(01)	14074268	7	OTHER HEALTH PROFESSIONS	605799469	HD1WMN6945W6	605799469	HD1WMN6945W6	US	47.660307	-122.315168	9087701	U_OF_WASHINGTON	SEATTLE	WA	SCHOOLS OF MEDICINE	981959472	UNITED STATES	N	43891	44620	879	Other Research-Related	2020	92070	NLM	92070	Public	FALSE	FALSE	NLM	10541283	5/23/22	PA-18-398	4R00LM012992-03	R00
NCI	9440401	2/1/18 0:00	PA-16-193	5K99CA215315-02	5	K99	CA	215315	2		SCHMIDT MICHAEL K	3/1/17 0:00	7/31/18 0:00	Transition to Independence Study Section (I)[NCI-I]	12309568	3	INTERNAL MEDICINE/MEDICINE	43207562	FL6GV84CKN57	43207562	FL6GV84CKN57	US	41.310925	-72.926428	9420201	YALE_U	NEW HAVEN	CT	SCHOOLS OF MEDICINE	65208327	UNITED STATES	N	43160	43312	398	Other Research-Related	7/10/05 0:00	8/1/06 0:00	NCI	148502	Private	TRUE	TRUE	NCI	9717404	43304	PA-16-193	4R00CA215315-03	R00
NIA	8823713	3/18/15 0:00	PA-11-197	5K99AG047255-02	5	K99	AG	47255	2		WILLIAMS JOHN	4/1/14 0:00	3/31/16 0:00	Biological Aging Study Section[NIA-B]	10906289	5	MICROBIOLOGY/IMMUN/VIROLOGY	82359691	LN53LCFJFL45	82359691	LN53LCFJFL45	US	42.369697	-71.11193	3212901	HARVARD_U	CAMBRIDGE	MA	SCHOOLS OF ARTS AND SCIENCES	21385369	UNITED STATES	N	42095	42460	866	Other Research-Related	7/7/05 0:00	9/17/15 0:00	NIA	115312	Private	FALSE	FALSE	NIA	9352417	42634	PA-11-197	4R00AG047255-03	R00
NHLBI	8714049	6/1/14 0:00	PA-11-197	5K99HL119618-02	5	K99	HL	119618	2		LAPOSKY AARON D	8/5/13 0:00	5/31/15 0:00	ZHL1-CSR-P(M2)	10787208	7	UnavaiLABle	30811269	QN6MS4VN7BD1	30811269	QN6MS4VN7BD1	US	42.336107	-71.107481	1080401	BRIGHAM_&_WOMENS_HOSP	BOSTON	MA	Independent Hospitals	21156110	UNITED STATES	N	41791	42155	233	Other Research-Related	7/6/05 0:00	3/31/41 0:00	NHLBI	88115	Private	TRUE	TRUE	NHLBI	9050862	42243	PA-11-197	4R00HL119618-03	R00
NIA	8517547	8/13/13 0:00	PA-11-197	5K99AG042487-02	5	K99	AG	42487	2		GUO MAX	8/1/12 0:00	9/30/13 0:00	Biological Aging Study Section[NIA-B]	10928234	3	BIOCHEMISTRY	43207562	FL6GV84CKN57	43207562	FL6GV84CKN57	US	41.310925	-72.926428	9420201	YALE_U	NEW HAVEN	CT	SCHOOLS OF ARTS AND SCIENCES	65208327	UNITED STATES	N	41501	41547	866	Other Research-Related	7/5/05 0:00	8/6/20 0:00	NIA	44049	Private	FALSE	FALSE	NIA	8785150	41690	PA-11-197	4R00AG042487-03	R00
NHGRI	9093830	5/26/16 0:00	PA-14-042	5K99HG008399-02	5	K99	HG	8399	2		BROOKS LISA	6/18/15 0:00	9/30/16 0:00	Genome Research Study Section[GNOM-G]	11149896	7	UnavaiLABle	76580745	DPMGH9MG1X67	76580745	DPMGH9MG1X67	US	42.337593	-71.108279	1464901	DANA-FARBER_CANCER_INST	BOSTON	MA	Independent Hospitals	22155450	UNITED STATES	N	42522	42643	172	Other Research-Related	7/8/05 0:00	5/7/16 0:00	NHGRI	42497	Private	TRUE	FALSE	NHGRI	9370913	42723	PA-14-042	4R00HG008399-03	R00
NIMH	9896849	3/12/20 0:00	PAR-18-814	5K99MH120047-02	5	K99	MH	120047	2		CHURCHILL JAMES D	4/1/19 0:00	1/31/21 0:00	ZNS1-SRB-L(15)	11547193	12	NONE	2484665	NJ1YPQXQG7U5	2484665	NJ1YPQXQG7U5	US	40.345441	-74.655866	6661401	PRINCETON_U	Princeton	NJ	UNIVERSITY-WIDE	85406000	UNITED STATES	N	43922	44227	242	Other Research-Related	7/12/05 0:00	9/15/96 0:00	NIMH	108372	Private	FALSE	FALSE	NIMH	10311156	##########	PAR-18-814	4R00MH120047-03	R00
NIDDK	7996198	12/18/09 0:00	PA-07-297	3K99DK081610-02S1	3	K99	DK	81610	2	S	RANKIN TRACY L	12/20/09 0:00	6/30/10 0:00	Kidney Urologic and Hematologic Diseases D Study Section[DDK-D]	6801231	3	PHYSIOLOGY	43207562	FL6GV84CKN57	43207562	FL6GV84CKN57	US	41.310925	-72.926428	9420201	YALE_U	NEW HAVEN	CT	SCHOOLS OF MEDICINE	65208327	UNITED STATES	N	40167	40359	701	Other Research-Related	7/2/05 0:00	11/3/84 0:00	NIDDK	30989	Private	TRUE	FALSE	NIDDK	8023877	40392		4R00DK081610-03	R00
NCI	7681330	40039	PA-07-297	5K99CA131488-02	5	K99	CA	131488	2		SCHMIDT MICHAEL K	39692	40359	Institutional Training and Education Study Section (F)[NCI-F]	2186003	12	UnavaiLABle	64931884	KUKXRCZ6NZC2	64931884	KUKXRCZ6NZC2	US	40.764045	-73.956024	5079202	SLOAN-KETTERING_INST_CAN_RES	NEW YORK	NY	Research Institutes	100656007	UNITED STATES	N	40057	40359	398	Other Research-Related	2009	139296	NCI	139296	Private	FALSE	FALSE	NCI	8099855	40368	PA-07-297	4R00CA131488-03	R00
NCI	8511506	7/18/13 0:00	PA-11-197	5K99CA168940-02	5	K99	CA	168940	2		SCHMIDT MICHAEL K	8/1/12 0:00	9/11/14 0:00	Institutional Training and Education Study Section (F)[NCI-F]	9442041	7	UnavaiLABle	120989983	C186U32QSBR9	120989983	C186U32QSBR9	US	42.363037	-71.08963	1742101	WHITEHEAD_INST_FOR_BIOMED_RES	CAMBRIDGE	MA	Research Institutes	21421025	UNITED STATES	N	41487	41893	398	Other Research-Related	7/5/05 0:00	2/1/12 0:00	NCI	113988	Private	FALSE	FALSE	NCI	8920191	41893	PA-11-197	4R00CA168940-03	R00
NHLBI	9205535	12/22/16 0:00	PA-15-083	5K99HL130523-02	5	K99	HL	130523	2		HUANG LI-SHIN	1/15/16 0:00	3/31/17 0:00	NHLBI Mentored Transition to Independence Study Section[MTI(OA)]	10048780	18	PEDIATRICS	9214214	HJD6G4D6TJY5	9214214	HJD6G4D6TJY5	US	37.426852	-122.17047	8046501	STANFORD_U	STANFORD	CA	SCHOOLS OF MEDICINE	943052004	UNITED STATES	N	42736	42825	837	Other Research-Related	7/9/05 0:00	2/5/60 0:00	NHLBI	168048	Private	TRUE	TRUE	NHLBI	9443102	42825	PA-15-083	4R00HL130523-03	R00
NIAID	7660600	7/30/09 0:00	PA-07-297	1K99AI079159-01A1	1	K99	AI	79159	1	A	PROGRAIS LAWRENCE J	8/1/09 0:00	7/31/10 0:00	Allergy Immunology and Transplantation Research Committee[AITC]	9239370	7	MICROBIOLOGY/IMMUN/VIROLOGY	605799469	HD1WMN6945W6	605799469	HD1WMN6945W6	US	47.660307	-122.315168	9087701	U_OF_WASHINGTON	SEATTLE	WA	SCHOOLS OF MEDICINE	981959472	UNITED STATES	N	40026	40390	855	Other Research-Related	7/1/05 0:00	5/29/46 0:00	NIAID	90000	Public	FALSE	FALSE	NIAID	8210398	40709	PA-10-063	4R00AI079159-02	R00
NHLBI	8532974	6/13/13 0:00	PA-11-197	5K99HL114879-02	5	K99	HL	114879	2		WANG LAN-HSIANG	8/20/12 0:00	6/30/14 0:00	ZHL1-CSR-P(M3)	9045128	7	PHYSIOLOGY	188435911	Z9CRZKD42ZT1	188435911	Z9CRZKD42ZT1	US	39.292248	-76.625629	820104	U_OF_MARYLAND_BALTIMORE	BALTIMORE	MD	SCHOOLS OF MEDICINE	212011508	UNITED STATES	N	41456	41820	837	Other Research-Related	7/5/05 0:00	11/15/68 0:00	NHLBI	134730	public	TRUE	FALSE	NHLBI	8803862	41774	PA-11-197	4R00HL114879-03	R00
NIMH	9306203	6/13/17 0:00	PA-15-083	5K99MH107719-02	5	K99	MH	107719	2		SARAMPOTE CHRISTOPHER S	7/1/16 0:00	6/30/18 0:00	ZMH1-ERB-S(01)	12031026	7	PHYSICAL MEDICINE & REHAB	1910777	FTMTDMBR29C7	1910777	FTMTDMBR29C7	US	39.325256	-76.605131	4134401	JOHNS_HOPKINS_U	BALTIMORE	MD	SCHOOLS OF MEDICINE	212182680	UNITED STATES	N	42917	43281	242	Other Research-Related	7/9/05 0:00	7/7/26 0:00	NIMH	82734	Private	FALSE	TRUE	NIMH	9569769	43281	PA-15-083	4R00MH107719-03	R00
NIDDK	8717658	8/15/14 0:00	PA-11-197	5K99DK097455-02	5	K99	DK	97455	2		HAFT CAROL R	8/15/13 0:00	9/16/15 0:00	Diabetes Endocrinology and Metabolic Diseases B Study Section[DDK-B]	11286487	13	INTERNAL MEDICINE/MEDICINE	621889815	QHF5ZZ114M72	621889815	QHF5ZZ114M72	US	40.8415	-73.9414	1833205	COLUMBIA_U_HEALTH_SCI	NEW YORK	NY	SCHOOLS OF MEDICINE	100323725	UNITED STATES	N	41866	42263	847	Other Research-Related	7/6/05 0:00	5/29/46 0:00	NIDDK	90000	Private	FALSE	TRUE	NIDDK	9121141	42264	PA-11-197	4R00DK097455-03	R00
NHLBI	8424218	1/29/13 0:00	PA-10-063	5K99HL106232-02	5	K99	HL	106232	2		SCOTT JANE	2/9/12 0:00	1/31/14 0:00	ZHL1-CSR-P(O2)	10396414	7	RADIATION-DIAGNOSTIC/ONCOLOGY	1910777	FTMTDMBR29C7	1910777	FTMTDMBR29C7	US	39.325256	-76.605131	4134401	JOHNS_HOPKINS_U	BALTIMORE	MD	SCHOOLS OF MEDICINE	212182680	UNITED STATES	N	41306	41670	837	Other Research-Related	7/5/05 0:00	6/3/39 0:00	NHLBI	87448	Private	TRUE	TRUE	NHLBI	8788317	41842	PA-10-063	4R00HL106232-03	R00
NIAID	7661942	7/22/09 0:00	PA-07-297	1K99AI075285-01A2	1	K99	AI	75285	1	A	PROGRAIS LAWRENCE J	7/22/09 0:00	6/30/10 0:00	Allergy Immunology and Transplantation Research Committee[AITC]	8585646	7	UnavaiLABle	30811269	QN6MS4VN7BD1	30811269	QN6MS4VN7BD1	US	42.336107	-71.107481	1080401	BRIGHAM_&_WOMENS_HOSP	BOSTON	MA	Independent Hospitals	21156110	UNITED STATES	N	40016	40359	855	Other Research-Related	7/1/05 0:00	6/2/46 0:00	NIAID	90004	Private	TRUE	TRUE	NIAID	8109613	40436	PA-10-063	4R00AI075285-02	R00
NIAMS	8840890	4/10/15 0:00	PA-11-197	5K99AR064837-02	5	K99	AR	64837	2		TYREE BERNADETTE	5/1/14 0:00	12/31/16 0:00	Arthritis and Musculoskeletal and Skin Diseases Special Grants Study Section[AMS]	10545921	1	ORTHOPEDICS	68552207	L6NFUM28LQM5	68552207	L6NFUM28LQM5	US	38.664368	-90.323797	9083901	WASHINGTON_U	SAINT LOUIS	MO	SCHOOLS OF MEDICINE	631304862	UNITED STATES	N	42125	42735	846	Other Research-Related	7/7/05 0:00	1/16/40 0:00	NIAMS	87675	Private	TRUE	TRUE	NIAMS	9389557	42713	PA-11-197	4R00AR064837-03	R00
NICHD	10021448	8/12/20 0:00	PA-19-130	5K99HD098298-02	5	K99	HD	98298	2		FEHR TUBA HALISE	9/19/19 0:00	8/31/21 0:00	Developmental Biology Study Section[CHHD-C]	14100048	5	MICROBIOLOGY/IMMUN/VIROLOGY	82359691	LN53LCFJFL45	82359691	LN53LCFJFL45	US	42.369697	-71.11193	3212901	HARVARD_U	CAMBRIDGE	MA	SCHOOLS OF ARTS AND SCIENCES	21385369	UNITED STATES	N	44075	44439	865	Other Research-Related	7/12/05 0:00	1/8/52 0:00	NICHD	128574	Private	FALSE	FALSE	NICHD	10414351	##########	PA-19-130	4R00HD098298-03	R00
NIDDK	8893076	8/7/15 0:00	PA-11-197	5K99DK101605-02	5	K99	DK	101605	2		HYDE JAMES F	8/1/14 0:00	7/31/16 0:00	Diabetes Endocrinology and Metabolic Diseases B Study Section[DDK-B]	10414706	7	GENETICS	47006379	JDLVAVGYJQ21	47006379	JDLVAVGYJQ21	US	42.335672	-71.104237	3212902	HARVARD_MED_SCH	BOSTON	MA	SCHOOLS OF MEDICINE	21201616	UNITED STATES	N	42217	42582	847	Other Research-Related	7/7/05 0:00	7/19/18 0:00	NIDDK	79824	Private	FALSE	FALSE	NIDDK	9267709	42529	PA-11-197	4R00DK101605-03	R00
NIDDK	9673718	3/21/19 0:00	PA-16-193	5K99DK114571-02	5	K99	DK	114571	2		HAFT CAROL R	4/1/18 0:00	4/30/19 0:00	Diabetes Endocrinology and Metabolic Diseases B Study Section[DDK-B]	11365002	33	PATHOLOGY	92530369	RN64EPNH8JC6	92530369	RN64EPNH8JC6	US	34.070199	-118.45102	577505	U_OF_CALIFORNIA_LOS_ANGELES	LOS ANGELES	CA	SCHOOLS OF MEDICINE	900952000	UNITED STATES	N	43556	43585	847	Other Research-Related	7/11/05 0:00	5/29/46 0:00	NIDDK	90000	Public	FALSE	FALSE	NIDDK	9984687	43692	PA-16-193	4R00DK114571-03	R00
NHLBI	8974440	11/25/15 0:00	PA-14-042	5K99HL125667-02	5	K99	HL	125667	2		CHARETTE MARC F	12/1/14 0:00	11/30/16 0:00	ZHL1-CSR-P(O1)	10890815	12	INTERNAL MEDICINE/MEDICINE	121911077	M5SZJ6VHUHN8	121911077	M5SZJ6VHUHN8	US	40.669895	-73.974354	5998304	NEW_YORK_U_SCH_OF_MED	NEW YORK	NY	SCHOOLS OF MEDICINE	10016	UNITED STATES	N	42339	42704	837	Other Research-Related	7/8/05 0:00	2/21/03 0:00	NHLBI	110721	Private	FALSE	TRUE	NHLBI	9376989	42726	PA-14-042	4R00HL125667-03	R00
NCI	8521185	8/5/13 0:00	PA-10-063	5K99CA157730-02	5	K99	CA	157730	2		SCHMIDT MICHAEL K	8/2/12 0:00	8/31/13 0:00	Institutional Training and Education Study Section (F)[NCI-F]	9160464	8	UnavaiLABle	73130411	FLJ7DQKLL226	73130411	FLJ7DQKLL226	US	42.363198	-71.068772	4907701	MASSACHUSETTS_GENERAL_HOSP	BOSTON	MA	Independent Hospitals	21142621	UNITED STATES	N	41487	41517	398	Other Research-Related	7/5/05 0:00	11/17/33 0:00	NCI	12375	Private	TRUE	FALSE	NCI	8901563	41878	PA-10-063	4R00CA157730-04	R00
NINDS	7903362	8/5/10 0:00	PA-07-297	5K99NS065974-02	5	K99	NS	65974	2		FOUNTAIN JANE W	8/1/09 0:00	9/30/11 0:00	NST-2 Study Section [NST-2]	2084889	49	UnavaiLABle	78731668	NNJ6BMBTFGN5	78731668	NNJ6BMBTFGN5	US	32.8863	-117.243929	7210001	SALK_INST_FOR_BIOLOGICAL_STUDIES	La Jolla	CA	Research Institutes	920371002	UNITED STATES	N	40391	40816	853	Other Research-Related	7/2/05 0:00	8/20/33 0:00	NINDS	85335	Private	FALSE	FALSE	NINDS	8450950	41093	PA-11-197	4R00NS065974-03	R00
NHLBI	8144808	7/7/11 0:00	PA-10-063	5K99HL105793-02	5	K99	HL	105793	2		SCHRAMM CHARLENE A	9/20/10 0:00	7/31/12 0:00	ZHL1-CSR-Z(O1)	9341416	18	INTERNAL MEDICINE/MEDICINE	9214214	HJD6G4D6TJY5	9214214	HJD6G4D6TJY5	US	37.426852	-122.17047	8046501	STANFORD_U	STANFORD	CA	SCHOOLS OF MEDICINE	943052004	UNITED STATES	N	40756	41121	837	Other Research-Related	7/3/05 0:00	8/11/77 0:00	NHLBI	101397	Private	TRUE	TRUE	NHLBI	8413075	41085	PA-11-197	4R00HL105793-03	R00
NIGMS	9987678	7/30/20 0:00	PA-18-398	5K99GM134121-02	5	K99	GM	134121	2		KEANE-MYERS ANDREA	8/1/19 0:00	6/30/21 0:00	ZGM1-TWD-8(KR)	12468588	7	MICROBIOLOGY/IMMUN/VIROLOGY	605799469	HD1WMN6945W6	605799469	HD1WMN6945W6	US	47.660307	-122.315168	9087701	U_OF_WASHINGTON	SEATTLE	WA	SCHOOLS OF MEDICINE	981959472	UNITED STATES	N	44044	44377	859	Other Research-Related	7/12/05 0:00	11/6/39 0:00	NIGMS	87604	Public	FALSE	FALSE	NIGMS	10410640	##########	PA-18-398	4R00GM134121-03	R00
NHGRI	10005404	8/8/20 0:00	PA-18-398	5K99HG010669-02	5	K99	HG	10669	2		PAZIN MICHAEL J	9/1/19 0:00	8/31/21 0:00	Genome Research Study Section[GNOM-G]	14332512	7	UnavaiLABle	623544785	H5G9NWEFHXN4	623544785	H5G9NWEFHXN4	US	42.363082	-71.087893	10021177	BROAD_INST_INC	CAMBRIDGE	MA	Research Institutes	21421027	UNITED STATES	N	44075	44439	172	Other Research-Related	7/12/05 0:00	4/9/43 0:00	NHGRI	125378	Private	FALSE	FALSE	NHGRI	10469855	##########	PA-18-398	4R00HG010669-03	R00
NCI	9581704	6/28/18 0:00	PA-16-193	1K99CA229991-01	1	K99	CA	229991	1		RADAEV SERGEY	7/1/18 0:00	6/30/19 0:00	Transition to Independence Study Section (I)[NCI-I]	14960878	18	RADIATION-DIAGNOSTIC/ONCOLOGY	9214214	HJD6G4D6TJY5	9214214	HJD6G4D6TJY5	US	37.426852	-122.17047	8046501	STANFORD_U	STANFORD	CA	SCHOOLS OF MEDICINE	943052004	UNITED STATES	N	43282	43646	398	Other Research-Related	7/10/05 0:00	5/11/23 0:00	NCI	154629	Private	TRUE	TRUE	NCI	9957979	43641	PA-16-193	4R00CA229991-02	R00
FIC	7502359	12/14/07 0:00	PA-06-133	7K99TW008043-02	7	K99	TW	8043	2		JESSUP CHRISTINE	7/1/07 0:00	6/30/11 0:00	Microbiology and Infectious Diseases B Research Study Section[MID-B]	8510044	5	INTERNAL MEDICINE/MEDICINE	66469933	S352L5PJLMP8	66469933	S352L5PJLMP8	US	33.791247	-84.3249	2384501	EMORY_U	ATLANTA	GA	SCHOOLS OF MEDICINE	303221007	UNITED STATES	N	39326	39660	989	Other Research-Related	6/29/05 0:00	10/28/17 0:00	FIC	79560	Private	TRUE	TRUE	FIC	7621168	39650	PA-07-297	4R00TW008043-03	R00
NICHD	10190540	4/29/21	PA-20-188	1K99HD104896-01	1	K99	HD	104896	1		BURES REGINA M	5/1/21	4/30/23	Population Sciences Study Section[CHHD-W]	15678814	13	PUBLIC HEALTH & PREV MEDICINE	621889815	QHF5ZZ114M72	621889815	QHF5ZZ114M72	US	40.8415	-73.9414	1833205	COLUMBIA_U_HEALTH_SCI	NEW YORK	NY	SCHOOLS OF PUBLIC HEALTH	100323725	UNITED STATES	N	5/1/21	4/30/22	853	Other Research-Related	7/13/05 0:00	3/25/58 0:00	NICHD	130842	Private	TRUE	FALSE	NICHD	10675120	8/18/22	PA-20-188	4R00HD104896-03	R00
NICHD	9670138	4/2/19 0:00	PA-16-193	5K99HD092625-02	5	K99	HD	92625	2		RAVINDRANATH NEELAKANTA	4/1/18 0:00	3/31/20 0:00	Developmental Biology Study Section[CHHD-C]	11739395	1	BIOCHEMISTRY	1785542	E3FDXZ6TBHW3	1785542	E3FDXZ6TBHW3	US	41.826136	-71.404513	1003201	BROWN_U	PROVIDENCE	RI	SCHOOLS OF MEDICINE	29034202	UNITED STATES	N	43556	43921	865	Other Research-Related	7/11/05 0:00	2/18/22 0:00	NICHD	117658	Private	FALSE	FALSE	NICHD	9906363	43668	PA-16-193	4R00HD092625-03	R00
NCI	8815119	2/5/15 0:00	PA-11-197	5K99CA175292-02	5	K99	CA	175292	2		RADAEV SERGEY	3/1/14 0:00	2/28/16 0:00	Transition to Independence Study Section (I)[NCI-I]	10532973	7	UnavaiLABle	30811269	QN6MS4VN7BD1	30811269	QN6MS4VN7BD1	US	42.336107	-71.107481	1080401	BRIGHAM_&_WOMENS_HOSP	BOSTON	MA	Independent Hospitals	21156110	UNITED STATES	N	42064	42428	398	Other Research-Related	7/7/05 0:00	10/11/78 0:00	NCI	174871	Private	FALSE	FALSE	NCI	9231536	42432	PA-11-197	4R00CA175292-03	R00
NCI	9119783	6/29/16 0:00	PA-14-042	5K99CA190889-02	5	K99	CA	190889	2		RADAEV SERGEY	8/3/15 0:00	6/30/17 0:00	Transition to Independence Study Section (I)[NCI-I]	12093255	7	PATHOLOGY	1910777	FTMTDMBR29C7	1910777	FTMTDMBR29C7	US	39.325256	-76.605131	4134401	JOHNS_HOPKINS_U	BALTIMORE	MD	SCHOOLS OF MEDICINE	212182680	UNITED STATES	N	42583	42916	398	Other Research-Related	7/8/05 0:00	11/24/35 0:00	NCI	86161	Private	TRUE	TRUE	NCI	9484541	42916	PA-14-042	4R00CA190889-03	R00
NCI	10105624	2/4/21	PA-19-130	1K99CA255926-01	1	K99	CA	255926	1		BOULANGER-ESPEUT CORINNE A	2/4/21	1/31/23	Transition to Independence Study Section (I)[NCI-I]	14852900	7	UnavaiLABle	120989983	C186U32QSBR9	120989983	C186U32QSBR9	US	42.363037	-71.08963	1742101	WHITEHEAD_INST_FOR_BIOMED_RES	CAMBRIDGE	MA	Research Institutes	21421025	UNITED STATES	N	2/4/21	1/31/22	398	Other Research-Related	7/13/05 0:00	1/28/15 0:00	NCI	115080	Private	FALSE	FALSE	NCI	10682652	9/1/22	PA-19-130	4R00CA255926-03	R00
NCI	7486313	7/24/08 0:00	PA-06-133	5K99CA129174-02	5	K99	CA	129174	2		SCHMIDT MICHAEL K	9/1/07 0:00	8/31/09 0:00	ZCA1-RTRB-A(M1)	1866233	18	ANATOMY/CELL BIOLOGY	9214214	HJD6G4D6TJY5	9214214	HJD6G4D6TJY5	US	37.426852	-122.17047	8046501	STANFORD_U	STANFORD	CA	SCHOOLS OF MEDICINE	943052004	UNITED STATES	N	39692	40056	398	Other Research-Related	6/30/05 0:00	5/4/76 0:00	NCI	137457	Private	TRUE	TRUE	NCI	7917083	40078	PA-06-133	4R00CA129174-03	R00
NIEHS	9546688	7/27/18 0:00	PA-16-193	5K99ES027496-02	5	K99	ES	27496	2		BOYLES ABEE	9/1/17 0:00	12/14/18 0:00	ZES1-JAB-D(C)	12336136	13	PUBLIC HEALTH & PREV MEDICINE	78861598	C8H9CNG1VBD9	78861598	C8H9CNG1VBD9	US	40.790284	-73.946781	3839801	ICAHN_SCH_OF_MED_AT_MOUNT_SINAI	NEW YORK	NY	SCHOOLS OF MEDICINE	100296574	UNITED STATES	N	43344	43448	113	Other Research-Related	7/10/05 0:00	4/9/83 0:00	NIEHS	103464	Private	TRUE	TRUE	NIEHS	9828797	43447	PA-16-193	4R00ES027496-03	R00
NCI	9495684	4/24/18 0:00	PA-16-193	5K99CA212302-02	5	K99	CA	212302	2		RADAEV SERGEY	6/2/17 0:00	6/30/18 0:00	Transition to Independence Study Section (I)[NCI-I]	12681981	3	INTERNAL MEDICINE/MEDICINE	42250712	GM1XX56LEP58	42250712	GM1XX56LEP58	US	39.953462	-75.193983	6463801	U_OF_PENNSYLVANIA	PHILADELPHIA	PA	SCHOOLS OF MEDICINE	191046205	UNITED STATES	N	43252	43281	398	Other Research-Related	7/10/05 0:00	8/27/76 0:00	NCI	174096	Private	TRUE	TRUE	NCI	9743919	43355	PA-16-193	4R00CA212302-03	R00
NIDDK	9985826	8/20/20 0:00	PA-18-398	5K99DK119366-02	5	K99	DK	119366	2		JONES TERESA L Z	8/1/19 0:00	7/31/21 0:00	Diabetes Endocrinology and Metabolic Diseases B Study Section[DDK-B]	10776167	12	NEUROLOGY	73133571	GNJ7BBP73WE9	73133571	GNJ7BBP73WE9	US	42.275494	-83.743038	1506502	U_OF_MICHIGAN_AT_ANN_ARBOR	ANN ARBOR	MI	SCHOOLS OF MEDICINE	481091276	UNITED STATES	N	44044	44408	847	Other Research-Related	7/12/05 0:00	5/29/46 0:00	NIDDK	90000	Public	TRUE	FALSE	NIDDK	10476670	44440	PA-18-398	4R00DK119366-03	R00
NCI	9307755	7/26/17 0:00	PA-15-083	5K99CA207872-02	5	K99	CA	207872	2		RADAEV SERGEY	9/1/16 0:00	8/31/18 0:00	Transition to Independence Study Section (I)[NCI-I]	11408252	4	SURGERY	44387793	TP7EK8DZV6N5	44387793	TP7EK8DZV6N5	US	36.007766	-78.926475	2221101	DUKE_U	DURHAM	NC	SCHOOLS OF MEDICINE	277054673	UNITED STATES	N	42979	43343	398	Other Research-Related	7/9/05 0:00	10/2/36 0:00	NCI	159522	Private	FALSE	TRUE	NCI	9783048	43362	PA-15-083	4R00CA207872-03	R00
NICHD	9252500	3/14/17 0:00	PA-15-083	5K99HD082350-02	5	K99	HD	82350	2		WHITE DELLA	4/1/16 0:00	3/31/18 0:00	Health Behavior and Context Study Section[CHHD-M]	10791660	7	OTHER HEALTH PROFESSIONS	1910777	FTMTDMBR29C7	1910777	FTMTDMBR29C7	US	39.325256	-76.605131	4134401	JOHNS_HOPKINS_U	BALTIMORE	MD	SCHOOLS OF NURSING	212182680	UNITED STATES	N	42826	43190	865	Other Research-Related	7/9/05 0:00	3/12/72 0:00	NICHD	135943	Private	TRUE	TRUE	NICHD	9637716	43243	PA-15-083	4R00HD082350-03	R00
NIMH	9027882	42430	PA-14-042	5K99MH104605-02	5	K99	MH	104605	2		SARAMPOTE CHRISTOPHER S	42068	42794	ZMH1-ERB-S(01)	11968961	18	PSYCHIATRY	9214214	HJD6G4D6TJY5	9214214	HJD6G4D6TJY5	US	37.426852	-122.17047	8046501	STANFORD_U	STANFORD	CA	SCHOOLS OF MEDICINE	943052004	UNITED STATES	N	42430	42794	242	Other Research-Related	2016	121949	NIMH	121949	Private	TRUE	TRUE	NIMH	9440579	42814	PA-14-042	4R00MH104605-03	R00
NIMH	7905658	7/13/10 0:00	PA-07-297	5K99MH086615-02	5	K99	MH	86615	2		DESMOND NANCY L	8/1/09 0:00	7/31/11 0:00	ZMH1-ERB-L(03)	9615154	13	UnavaiLABle	167204994	TYVNMW8FNQQ3	167204994	TYVNMW8FNQQ3	US	40.843076	-73.944206	1590919	NEW_YORK_STATE_PSY	NEW YORK	NY	Independent Hospitals	100321007	UNITED STATES	N	40391	40755	281	Other Research-Related	7/2/05 0:00	5/29/46 0:00	NIMH	90000	Private	TRUE	FALSE	NIMH	8305317	40779	PA-07-297	4R00MH086615-03	R00
NCI	8354071	8/14/12 0:00	PA-11-197	1K99CA168987-01	1	K99	CA	168987	1		SCHMIDT MICHAEL K	9/1/12 0:00	12/31/13 0:00	Institutional Training and Education Study Section (F)[NCI-F]	11104857	18	BIOCHEMISTRY	9214214	HJD6G4D6TJY5	9214214	HJD6G4D6TJY5	US	37.426852	-122.17047	8046501	STANFORD_U	STANFORD	CA	SCHOOLS OF MEDICINE	943052004	UNITED STATES	N	41153	41639	398	Other Research-Related	7/4/05 0:00	7/12/01 0:00	NCI	110132	Private	FALSE	TRUE	NCI	8773658	41635	PA-11-197	4R00CA168987-02	R00
NIA	8352636	7/26/12 0:00	PA-11-197	1K99AG042596-01	1	K99	AG	42596	1		KING JONATHAN W	8/1/12 0:00	11/15/13 0:00	Basic Neuroscience of Aging Study Section[NIA-N]	9298617	5	PSYCHOLOGY	965717143	GTNBNWXJ12D5	965717143	DWH7MSXKA2A8; GTNBNWXJ12D5	US	36.143381	-86.803365	8721001	VANDERBILT_U	Nashville	TN	SCHOOLS OF ARTS AND SCIENCES	372032408	UNITED STATES	N	41122	41593	866	Other Research-Related	7/4/05 0:00	10/9/35 0:00	NIA	86115	Private	TRUE	FALSE	NIA	8921511	41901	PA-11-197	4R00AG042596-02	R00
NHLBI	7510750	39686	PA-07-297	1K99HL093115-01	1	K99	HL	93115	1		COMMARATO MICHAEL	39685	40025	ZHL1-CSR-S(M1)	9230434	5	INTERNAL MEDICINE/MEDICINE	66469933	S352L5PJLMP8	66469933	S352L5PJLMP8	US	33.791247	-84.3249	2384501	EMORY_U	ATLANTA	GA	SCHOOLS OF MEDICINE	303221007	UNITED STATES	N	39685	40025	837	Other Research-Related	2008	81167	NHLBI	81167	Private	TRUE	TRUE	NHLBI	7925118	40060	PA-07-297	4R00HL093115-02	R00
NIDA	9523166	6/14/18 0:00	PA-16-193	5K99DA043629-02	5	K99	DA	43629	2		NAIR SUNILA GOPI	7/15/17 0:00	7/31/19 0:00	ZDA1-SXM-M(03)S	11697289	8	UnavaiLABle	73130411	FLJ7DQKLL226	73130411	FLJ7DQKLL226	US	42.363198	-71.068772	4907701	MASSACHUSETTS_GENERAL_HOSP	BOSTON	MA	Independent Hospitals	21142621	UNITED STATES	N	43282	43677	279	Other Research-Related	7/10/05 0:00	10/9/09 0:00	NIDA	186192	Private	TRUE	TRUE	NIDA	9955464	43720	PA-16-193	4R00DA043629-03	R00
NIEHS	9386450	9/13/17 0:00	PA-16-193	1K99ES027508-01A1	1	K99	ES	27508	1	A	JOUBERT BONNIE	9/15/17 0:00	8/31/18 0:00	ZES1-JAB-D(C)	10575122	13	PEDIATRICS	78861598	C8H9CNG1VBD9	78861598	C8H9CNG1VBD9	US	40.790284	-73.946781	3839801	ICAHN_SCH_OF_MED_AT_MOUNT_SINAI	NEW YORK	NY	SCHOOLS OF MEDICINE	100296574	UNITED STATES	N	42993	43343	113	Other Research-Related	7/9/05 0:00	2/17/85 0:00	NIEHS	104144	Private	TRUE	TRUE	NIEHS	9767350	43354	PA-16-193	4R00ES027508-02	R00
NINDS	8823839	3/18/15 0:00	PA-11-197	5K99NS087112-02	5	K99	NS	87112	2		MAMOUNAS LAURA	4/1/14 0:00	3/31/16 0:00	NST-2 Study Section [NST-2]	10514816	12	NEUROSCIENCES	41968306	NX9PXMKW5KW8	41968306	NX9PXMKW5KW8	US	40.729659	-73.997018	5998301	NEW_YORK_U	NEW YORK	NY	SCHOOLS OF ARTS AND SCIENCES	100122300	UNITED STATES	N	42095	42460	853	Other Research-Related	7/7/05 0:00	5/11/23 0:00	NINDS	81581	Private	FALSE	FALSE	NINDS	9418960	42839	PA-11-197	4R00NS087112-03	R00
NIGMS	7772503	1/11/10 0:00	PA-09-036	1K99GM089985-01	1	K99	GM	89985	1		OKITA RICHARD T	1/11/10 0:00	12/31/10 0:00	ZGM1-BRT-9(KR)	9160330	7	BIOCHEMISTRY	47006379	JDLVAVGYJQ21	47006379	JDLVAVGYJQ21	US	42.335672	-71.104237	3212902	HARVARD_MED_SCH	BOSTON	MA	SCHOOLS OF MEDICINE	21201616	UNITED STATES	N	40189	40543	859	Other Research-Related	7/2/05 0:00	5/9/46 0:00	NIGMS	89980	Private	FALSE	FALSE	NIGMS	8210105	40574	PA-10-063	4R00GM089985-02	R00
NIDCD	8678358	41671	PA-11-197	1K99DC013805-01	1	K99	DC	13805	1		SKLARE DAN	41671	42035	Communication Disorders Review Committee[CDRC]	10308463	49	UnavaiLABle	781613492	PHZJFZ32NKH4	781613492	PHZJFZ32NKH4	US	32.903062	-117.243592	7375802	SCRIPPS_RES_INST_THE	LA JOLLA	CA	Other Domestic Non-Profits	920371000	UNITED STATES	N	41671	42035	173	Other Research-Related	2014	103950	NIDCD	103950	Private	FALSE	FALSE	NIDCD	8990601	42082	PA-11-197	4R00DC013805-02	R00
NHGRI	7641202	7/22/09 0:00	PA-07-297	1K99HG005015-01	1	K99	HG	5015	1		BROOKS LISA	7/24/09 0:00	6/10/10 0:00	Genome Research Study Section[GNOM-G]	8449792	7	BIOSTATISTICS & OTHER MATH SCI	1910777	FTMTDMBR29C7	1910777	FTMTDMBR29C7	US	39.325256	-76.605131	4134401	JOHNS_HOPKINS_U	BALTIMORE	MD	SCHOOLS OF PUBLIC HEALTH	212182680	UNITED STATES	N	40018	40339	172	Other Research-Related	7/1/05 0:00	5/29/46 0:00	NHGRI	90000	Private	TRUE	TRUE	NHGRI	8061327	40339	PA-10-063	4R00HG005015-02	R00
NIDCR	8824510	2/26/15 0:00	PAR-12-283	5K99DE024178-02	5	K99	DE	24178	2		FRIEDEN LESLIE A	4/1/14 0:00	3/31/17 0:00	NIDCR Special Grants Review Committee[DSR]	8063847	12	PHYSIOLOGY	73133571	GNJ7BBP73WE9	73133571	GNJ7BBP73WE9	US	42.275494	-83.743038	1506502	U_OF_MICHIGAN_AT_ANN_ARBOR	ANN ARBOR	MI	SCHOOLS OF MEDICINE	481091276	UNITED STATES	N	42095	42825	121	Other Research-Related	7/7/05 0:00	8/26/77 0:00	NIDCR	101412	Public	FALSE	FALSE	NIDCR	9260998	42502	PAR-12-283	4R00DE024178-03	R00
NIDA	8164450	9/16/11 0:00	PA-10-063	1K99DA031777-01	1	K99	DA	31777	1		LIN YU	9/30/11 0:00	8/31/12 0:00	Career Development Education and Training Study Section[NIDA-K]	10596371	13	PHYSIOLOGY	621889815	QHF5ZZ114M72	621889815	QHF5ZZ114M72	US	40.8415	-73.9414	1833205	COLUMBIA_U_HEALTH_SCI	NEW YORK	NY	SCHOOLS OF MEDICINE	100323725	UNITED STATES	N	40816	41152	279	Other Research-Related	7/3/05 0:00	5/11/40 0:00	NIDA	160839	Private	FALSE	FALSE	NIDA	8525879	41151	PA-11-197	4R00DA031777-02	R00
NIDDK	10066350	11/16/20	PA-19-130	5K99DK120869-02	5	K99	DK	120869	2		COOKE BRAD	12/15/19	6/30/22	Diabetes Endocrinology and Metabolic Diseases B Study Section[DDK-B]	15496117	12	UnavaiLABle	71037113	LHGDNJMZ64Y1	71037113	LHGDNJMZ64Y1	US	40.763746	-73.955386	7056601	ROCKEFELLER_U	NEW YORK	NY	Domestic Higher Education	100656399	UNITED STATES	N	12/15/20	6/30/22	847	Other Research-Related	7/13/05 0:00	5/29/46 0:00	NIDDK	90000	Private	FALSE	FALSE	NIDDK	10507835	6/16/22	PA-19-130	4R00DK120869-03	R00
NIAMS	7842574	5/19/10 0:00	PA-07-297	5K99AR057260-02	5	K99	AR	57260	2		BAKER CARL	6/1/09 0:00	5/31/11 0:00	Arthritis and Musculoskeletal and Skin Diseases Special Grants Study Section[AMS]	8759488	12	BIOLOGY	71037113	LHGDNJMZ64Y1	71037113	LHGDNJMZ64Y1	US	40.763746	-73.955386	7056601	ROCKEFELLER_U	NEW YORK	NY	GRADUATE SCHOOLS	100656399	UNITED STATES	N	40330	40694	846	Other Research-Related	7/2/05 0:00	5/29/46 0:00	NIAMS	90000	Private	FALSE	FALSE	NIAMS	8264024	40781	PA-07-297	4R00AR057260-03	R00
NEI	10093054	3/1/21	PA-19-130	5K99EY031137-02	5	K99	EY	31137	2		AGARWAL NEERAJ	2/1/20	9/29/21	ZEY1-VSN(04)	11261450	18	UnavaiLABle	22946007	L8RJFGJXXS36	22946007	L8RJFGJXXS36	US	26.935471	-80.116253	10026055	MAX_PLANCK_FLORIDA_CORPORATION	JUPITER	FL	Research Institutes	334585293	UNITED STATES	N	2/1/21	9/29/21	867	Other Research-Related	7/13/05 0:00	5/23/95 0:00	NEI	107891	Private	FALSE	FALSE	NEI	10405877	##########	PA-19-130	4R00EY031137-03	R00
NIDCD	8573019	11/27/13 0:00	PA-11-197	5K99DC012775-02	5	K99	DC	12775	2		RIVERA-RENTAS ALBERTO L	12/1/12 0:00	3/31/14 0:00	Communication Disorders Review Committee[CDRC]	9172467	5	MICROBIOLOGY/IMMUN/VIROLOGY	82359691	LN53LCFJFL45	82359691	LN53LCFJFL45	US	42.369697	-71.11193	3212901	HARVARD_U	CAMBRIDGE	MA	SCHOOLS OF ARTS AND SCIENCES	21385369	UNITED STATES	N	41609	41729	173	Other Research-Related	7/6/05 0:00	7/28/85 0:00	NIDCD	31256	Private	FALSE	FALSE	NIDCD	8831208	41809	PA-11-197	4R00DC012775-03	R00
NIDDK	7657346	6/23/09 0:00	PA-07-297	5K99DK081605-02	5	K99	DK	81605	2		HAFT CAROL R	7/15/08 0:00	9/4/09 0:00	Diabetes Endocrinology and Metabolic Diseases B Study Section[DDK-B]	9233631	7	UnavaiLABle	76580745	DPMGH9MG1X67	76580745	DPMGH9MG1X67	US	42.337593	-71.108279	1464901	DANA-FARBER_CANCER_INST	BOSTON	MA	Independent Hospitals	22155450	UNITED STATES	N	39995	40060	847	Other Research-Related	7/1/05 0:00	5/29/46 0:00	NIDDK	90000	Private	FALSE	FALSE	NIDDK	7893958	40059		4R00DK081605-03	R00
NIDCD	9302744	7/24/17 0:00	PA-15-083	5K99DC015554-02	5	K99	DC	15554	2		COOPER JUDITH	8/1/16 0:00	7/31/18 0:00	ZDC1-SRB-R(38)	12235516	7	NEUROLOGY	1910777	FTMTDMBR29C7	1910777	FTMTDMBR29C7	US	39.325256	-76.605131	4134401	JOHNS_HOPKINS_U	BALTIMORE	MD	SCHOOLS OF MEDICINE	212182680	UNITED STATES	N	42948	43312	173	Other Research-Related	7/9/05 0:00	6/26/38 0:00	NIDCD	87106	Private	FALSE	TRUE	NIDCD	9716726	43283	PA-15-083	4R00DC015554-03	R00
NIMH	10394531	6/24/21	PA-20-272	3K99MH120053-02S1	3	K99	MH	120053	2	S	CHURCHILL JAMES D	4/19/21	3/31/22		12202472	8	UnavaiLABle	73130411	FLJ7DQKLL226	73130411	FLJ7DQKLL226	US	42.363198	-71.068772	4907701	MASSACHUSETTS_GENERAL_HOSP	BOSTON	MA	Independent Hospitals	21142621	UNITED STATES	N	7/1/21	3/31/22	242	Other Research-Related	7/13/05 0:00	6/23/22 0:00	NIMH	81259	Private	FALSE	FALSE	NIMH	10654249	7/28/22	PAR-18-814	4R00MH120053-03	R00
NHLBI	9205259	12/5/16 0:00	PA-15-083	5K99HL127295-02	5	K99	HL	127295	2		WANG WAYNE C	1/15/16 0:00	5/31/18 0:00	NHLBI Mentored Transition to Independence Study Section[MTI(OA)]	11199727	18	INTERNAL MEDICINE/MEDICINE	9214214	HJD6G4D6TJY5	9214214	HJD6G4D6TJY5	US	37.426852	-122.17047	8046501	STANFORD_U	STANFORD	CA	SCHOOLS OF MEDICINE	943052004	UNITED STATES	N	42736	43251	837	Other Research-Related	7/9/05 0:00	1/8/71 0:00	NHLBI	135514	Private	FALSE	FALSE	NHLBI	9675361	43238	PA-15-083	4R00HL127295-03	R00
NIBIB	8122200	40745	PA-09-036	5K99EB012107-02	5	K99	EB	12107	2		ERIM ZEYNEP	40395	41121	ZEB1-OSR-C(M1)	9991175	8	UnavaiLABle	73130411	FLJ7DQKLL226	73130411	FLJ7DQKLL226	US	42.363198	-71.068772	4907701	MASSACHUSETTS_GENERAL_HOSP	BOSTON	MA	Independent Hospitals	21142621	UNITED STATES	N	40756	41121	286	Other Research-Related	2011	94905	NIBIB	94905	Private	TRUE	TRUE	NIBIB	8507873	41122	PA-09-036	4R00EB012107-03	R00
NIAID	9141745	7/1/16 0:00	PA-15-083	1K99AI125065-01	1	K99	AI	125065	1		SANDERS BRIGITTE E	7/1/16 0:00	12/31/17 0:00	Acquired Immunodeficiency Syndrome Research Study Section[AIDS]	11920834	3	MICROBIOLOGY/IMMUN/VIROLOGY	43207562	FL6GV84CKN57	43207562	FL6GV84CKN57	US	41.310925	-72.926428	9420201	YALE_U	NEW HAVEN	CT	SCHOOLS OF MEDICINE	65208327	UNITED STATES	N	42552	43100	855	Other Research-Related	7/8/05 0:00	6/9/64 0:00	NIAID	133110	Private	FALSE	FALSE	NIAID	9599624	43110	PA-15-083	4R00AI125065-02	R00
NLM	7469568	7/17/08 0:00	PA-06-133	5K99LM009556-02	5	K99	LM	9556	2		SIM HUA-CHUAN	7/16/07 0:00	7/15/09 0:00	ZLM1-ZH-R(J2)	8671590	13	MISCELLANEOUS	621889815	QHF5ZZ114M72	621889815	QHF5ZZ114M72	US	40.8415	-73.9414	1833205	COLUMBIA_U_HEALTH_SCI	NEW YORK	NY	SCHOOLS OF MEDICINE	100323725	UNITED STATES	N	39645	40009	879	Other Research-Related	6/30/05 0:00	4/17/67 0:00	NLM	134152	Private	FALSE	FALSE	NLM	7934997	40077	PA-06-133	7R00LM009556-04	R00
NIGMS	9534140	7/30/18 0:00	PA-16-193	5K99GM124296-02	5	K99	GM	124296	2		BARSKI OLEG	8/1/17 0:00	7/31/19 0:00	ZGM1-TWD-B(KR)	12336182	8	UnavaiLABle	73130411	FLJ7DQKLL226	73130411	FLJ7DQKLL226	US	42.363198	-71.068772	4907701	MASSACHUSETTS_GENERAL_HOSP	BOSTON	MA	Independent Hospitals	21142621	UNITED STATES	N	43313	43677	859	Other Research-Related	7/10/05 0:00	5/29/46 0:00	NIGMS	90000	Private	FALSE	FALSE	NIGMS	10087667	43887	PA-16-193	4R00GM124296-03	R00
NCI	8304898	41106	PA-10-063	5K99CA160350-02	5	K99	CA	160350	2		SCHMIDT MICHAEL K	40756	41486	Institutional Training and Education Study Section (F)[NCI-F]	10646072	7	UnavaiLABle	30811269	QN6MS4VN7BD1	30811269	QN6MS4VN7BD1	US	42.336107	-71.107481	1080401	BRIGHAM_&_WOMENS_HOSP	BOSTON	MA	Independent Hospitals	21156110	UNITED STATES	N	41122	41486	398	Other Research-Related	2012	132710	NCI	132710	Private	TRUE	TRUE	NCI	8689250	41480	PA-10-063	4R00CA160350-03	R00
NIAID	7989573	40312	PA-09-036	1K99AI087963-01A1	1	K99	AI	87963	1	A	PROGRAIS LAWRENCE J	40313	40663	Microbiology and Infectious Diseases Advisory Committee[MID]	9957208	3	MICROBIOLOGY/IMMUN/VIROLOGY	43207562	FL6GV84CKN57	43207562	FL6GV84CKN57	US	41.310925	-72.926428	9420201	YALE_U	NEW HAVEN	CT	SCHOOLS OF MEDICINE	65208327	UNITED STATES	N	40313	40663	855	Other Research-Related	2010	94770	NIAID	94770	Private	TRUE	FALSE	NIAID	8198492	40606		4R00AI087963-02	R00
NICHD	9335413	8/4/17 0:00	PA-15-083	5K99HD089753-02	5	K99	HD	89753	2		CHAKHTOURA NAHIDA ABDO	8/19/16 0:00	7/31/18 0:00	AIDS Clinical Studies and Epidemiology Study Section[ACE]	12518193	7	INTERNAL MEDICINE/MEDICINE	1910777	FTMTDMBR29C7	1910777	FTMTDMBR29C7	US	39.325256	-76.605131	4134401	JOHNS_HOPKINS_U	BALTIMORE	MD	SCHOOLS OF MEDICINE	212182680	UNITED STATES	N	42948	43312	865	Other Research-Related	7/9/05 0:00	3/16/59 0:00	NICHD	131198	Private	FALSE	FALSE	NICHD	9737100	43322	PA-15-083	4R00HD089753-03	R00
NICHD	9765363	7/23/19 0:00	PA-16-193	5K99HD096049-02	5	K99	HD	96049	2		MUKHOPADHYAY MAHUA	8/17/18 0:00	11/30/20 0:00	Reproduction Andrology and Gynecology Study Section[CHHD-R]	15221182	7	UnavaiLABle	623544785	H5G9NWEFHXN4	623544785	H5G9NWEFHXN4	US	42.363082	-71.087893	10021177	BROAD_INST_INC	CAMBRIDGE	MA	Research Institutes	21421027	UNITED STATES	N	43678	44165	865	Other Research-Related	7/11/05 0:00	3/22/62 0:00	NICHD	132300	Private	TRUE	FALSE	NICHD	10301498	##########	PA-16-193	4R00HD096049-03	R00
NCI	10125131	2/2/21	PA-19-130	5K99CA248835-02	5	K99	CA	248835	2		JHAPPAN CHAMELLI	3/10/20	2/28/22	Transition to Independence Study Section (I)[NCI-I]	12511514	52	UnavaiLABle	603880287	ZPAUY3FQMM26	603880287	ZPAUY3FQMM26	US	32.838775	-117.253243	2465301	LA_JOLLA_INST_FOR_IMMUNOLOGY	LA JOLLA	CA	Research Institutes	920371387	UNITED STATES	N	3/1/21	2/28/22	398	Other Research-Related	7/13/05 0:00	3/23/96 0:00	NCI	144720	Private	FALSE	FALSE	NCI	10625598	7/1/22	PA-19-130	4R00CA248835-03	R00
NIEHS	8968016	8/26/15 0:00	PA-14-042	1K99ES024808-01A1	1	K99	ES	24808	1	A	JOUBERT BONNIE	9/1/15 0:00	10/31/16 0:00	ZES1-LWJ-D(KC)	12073336	13	PUBLIC HEALTH & PREV MEDICINE	124726725	GS3YEVSS12N6	124726725	GS3YEVSS12N6	US	37.870017	-122.268624	577502	U_OF_CALIFORNIA_BERKELEY	BERKELEY	CA	SCHOOLS OF PUBLIC HEALTH	947101749	UNITED STATES	N	42248	42674	113	Other Research-Related	7/7/05 0:00	2/28/94 0:00	NIEHS	70918	public	TRUE	FALSE	NIEHS	9385035	42914	PA-14-042	4R00ES024808-02	R00
NIEHS	9117554	7/21/16 0:00	PA-14-042	5K99ES025835-02	5	K99	ES	25835	2		SHAUGHNESSY DANIEL	8/1/15 0:00	7/31/17 0:00	ZES1-LWJ-D(KC)	15189663	12	BIOLOGY	41968306	NX9PXMKW5KW8	41968306	NX9PXMKW5KW8	US	40.729659	-73.997018	5998301	NEW_YORK_U	NEW YORK	NY	SCHOOLS OF ARTS AND SCIENCES	100122300	UNITED STATES	N	42583	42947	113	Other Research-Related	7/8/05 0:00	3/11/81 0:00	NIEHS	102705	Private	TRUE	FALSE	NIEHS	9626049	43133	PA-14-042	4R00ES025835-03	R00
NCI	7249960	4/24/07 0:00	PA-06-133	1K99CA127772-01	1	K99	CA	127772	1		SCHMIDT MICHAEL K	4/24/07 0:00	9/30/08 0:00	ZCA1-RTRB-2(J1)	8668133	3	UnavaiLABle	65968786	GV31TMFLPY88	65968786	GV31TMFLPY88	US	40.86755	-73.473456	4577101	COLD_SPRING_HARBOR_LAB	COLD SPRING HARBOR	NY	Research Institutes	117242209	UNITED STATES	N	39196	39721	398	Other Research-Related	6/29/05 0:00	9/10/07 0:00	NCI	112383	Private	FALSE	FALSE	NCI	7658439	39720	PA-06-133	4R00CA127772-02	R00
NIMH	7623163	4/24/09 0:00	PA-07-297	5K99MH083050-02	5	K99	MH	83050	2		DESMOND NANCY L	5/15/08 0:00	6/30/10 0:00	ZMH1-ERB-H(01)	7263791	3	NEUROSCIENCES	96997515	NPSNT86JKN51	96997515	NPSNT86JKN51	US	45.49882	-122.685647	6297007	OREGON_HEALTH_&_SCI_U	PORTLAND	OR	OVERALL MEDICAL	972393098	UNITED STATES	N	39934	40359	281	Other Research-Related	7/1/05 0:00	2/14/44 0:00	NIMH	89165	Public	FALSE	FALSE	NIMH	8066133	40374	PA-07-297	4R00MH083050-03	R00
NIDCR	9509400	7/19/18 0:00	PA-16-193	5K99DE027218-02	5	K99	DE	27218	2		FRIEDEN LESLIE A	9/1/17 0:00	8/31/20 0:00	NIDCR Special Grants Review Committee[DSR]	14540133	37	ORTHOPEDICS	72933393	G88KLJR3KYT5	72933393	G88KLJR3KYT5	US	34.017282	-118.281254	7636101	U_OF_SOUTHERN_CALIFORNIA	Los Angeles	CA	SCHOOLS OF MEDICINE	900894304	UNITED STATES	N	43344	44074	121	Other Research-Related	7/10/05 0:00	2/23/36 0:00	NIDCR	159300	Private	FALSE	FALSE	NIDCR	10212674	44049	PA-16-193	4R00DE027218-03	R00
NICHD	9747979	8/27/19 0:00	PA-16-193	5K99HD096322-02	5	K99	HD	96322	2		KING ROSALIND B	8/1/18 0:00	7/31/20 0:00	Population Sciences Study Section[CHHD-W]	11564292	33	PUBLIC HEALTH & PREV MEDICINE	92530369	RN64EPNH8JC6	92530369	RN64EPNH8JC6	US	34.070199	-118.45102	577505	U_OF_CALIFORNIA_LOS_ANGELES	LOS ANGELES	CA	SCHOOLS OF PUBLIC HEALTH	900952000	UNITED STATES	N	43678	44043	865	Other Research-Related	7/11/05 0:00	12/16/09 0:00	NICHD	113211	Public	FALSE	FALSE	NICHD	10181777	44025	PA-16-193	4R00HD096322-03	R00
NHLBI	8301583	5/29/12 0:00	PA-10-063	5K99HL109162-02	5	K99	HL	109162	2		TIGNO XENIA	7/15/11 0:00	5/31/14 0:00	ZHL1-CSR-Z(M1)	10329267	7	UnavaiLABle	30811269	QN6MS4VN7BD1	30811269	QN6MS4VN7BD1	US	42.336107	-71.107481	1080401	BRIGHAM_&_WOMENS_HOSP	BOSTON	MA	Independent Hospitals	21156110	UNITED STATES	N	41061	41790	837	Other Research-Related	7/4/05 0:00	7/12/75 0:00	NHLBI	137160	Private	TRUE	TRUE	NHLBI	8803459	41705	PA-10-063	4R00HL109162-03	R00
NHLBI	7323238	12/5/07 0:00	PA-06-133	5K99HL088021-02	5	K99	HL	88021	2		MONDORO TRACI	12/1/06 0:00	11/30/10 0:00	ZHL1-CSR-M(F1)	8619084	7	UnavaiLABle	78200995	HMSNCM57QNR5	78200995	HMSNCM57QNR5	US	47.627342	-122.331593	861001	FRED_HUTCHINSON_CANCER_RES_CTR	SEATTLE	WA	Research Institutes	981094433	UNITED STATES	N	39417	40512	839	Other Research-Related	6/30/05 0:00	8/6/43 0:00	NHLBI	88973	Private	TRUE	TRUE	NHLBI	8166090	40596	PA-10-063	4R00HL088021-03	R00
NCI	9523112	6/20/18 0:00	PA-16-077	5K99CA204601-02	5	K99	CA	204601	2		SCHMIDT MICHAEL K	8/1/17 0:00	7/31/19 0:00	Transition to Independence Study Section (I)[NCI-I]	11404361	7	UnavaiLABle	76580745	DPMGH9MG1X67	76580745	DPMGH9MG1X67	US	42.337593	-71.108279	1464901	DANA-FARBER_CANCER_INST	BOSTON	MA	Independent Hospitals	22155450	UNITED STATES	N	43313	43677	398	Other Research-Related	7/10/05 0:00	2/4/71 0:00	NCI	135541	Private	FALSE	FALSE	NCI	9979048	43707	PA-16-077	4R00CA204601-03	R00
NICHD	9458385	3/28/17 0:00	PA-14-042	3K99HD079668-02S1	3	K99	HD	79668	2	S	ESPOSITO LAYLA E	5/1/15 0:00	8/31/17 0:00	Biobehavioral and Behavioral Sciences Study Section[CHHD-H]	10116944	13	PSYCHIATRY	621889815	QHF5ZZ114M72	621889815	QHF5ZZ114M72	US	40.8415	-73.9414	1833205	COLUMBIA_U_HEALTH_SCI	NEW YORK	NY	SCHOOLS OF MEDICINE	100323725	UNITED STATES	N	42823	42978	865	Other Research-Related	7/9/05 0:00	5/18/49 0:00	NICHD	18036	Private	TRUE	FALSE	NICHD	9538351	42986	PA-14-042	4R00HD079668-03	R00
NIA	7939860	8/9/10 0:00	PA-09-036	5K99AG033670-02	5	K99	AG	33670	2		REFOLO LORENZO	9/30/09 0:00	8/31/11 0:00	Basic Neuroscience of Aging Study Section[NIA-N]	9446822	8	UnavaiLABle	73130411	FLJ7DQKLL226	73130411	FLJ7DQKLL226	US	42.363198	-71.068772	4907701	MASSACHUSETTS_GENERAL_HOSP	BOSTON	MA	Independent Hospitals	21142621	UNITED STATES	N	40422	40786	866	Other Research-Related	7/2/05 0:00	1/8/43 0:00	NIA	88763	Private	TRUE	TRUE	NIA	8262031	40918	PA-10-063	4R00AG033670-03	R00
NCI	7486342	5/29/08 0:00	PA-06-133	5K99CA129172-02	5	K99	CA	129172	2		SCHMIDT MICHAEL K	8/17/07 0:00	1/31/09 0:00	ZCA1-RTRB-A(M1)	8800261	7	UnavaiLABle	76580745	DPMGH9MG1X67	76580745	DPMGH9MG1X67	US	42.337593	-71.108279	1464901	DANA-FARBER_CANCER_INST	BOSTON	MA	Independent Hospitals	22155450	UNITED STATES	N	39630	39844	398	Other Research-Related	6/30/05 0:00	5/29/46 0:00	NCI	90000	Private	FALSE	FALSE	NCI	7765140	39972	PA-06-133	4R00CA129172-03	R00
NIEHS	9517056	6/13/18 0:00	PA-16-193	5K99ES027022-02	5	K99	ES	27022	2		GRAY KIMBERLY A	7/1/17 0:00	9/22/18 0:00	ZES1-LWJ-D(K)	9613432	13	PUBLIC HEALTH & PREV MEDICINE	78861598	C8H9CNG1VBD9	78861598	C8H9CNG1VBD9	US	40.790284	-73.946781	3839801	ICAHN_SCH_OF_MED_AT_MOUNT_SINAI	NEW YORK	NY	SCHOOLS OF MEDICINE	100296574	UNITED STATES	N	43282	43365	113	Other Research-Related	7/10/05 0:00	7/11/69 0:00	NIEHS	98444	Private	TRUE	FALSE	NIEHS	9761612	43366	PA-16-193	4R00ES027022-03	R00
NIBIB	9325010	42895	PA-15-083	5K99EB021349-02	5	K99	EB	21349	2		WANG SHUMIN	42584	43343	ZEB1-OSR-E(M1)S	9016396	8	UnavaiLABle	73130411	FLJ7DQKLL226	73130411	FLJ7DQKLL226	US	42.363198	-71.068772	4907701	MASSACHUSETTS_GENERAL_HOSP	BOSTON	MA	Independent Hospitals	21142621	UNITED STATES	N	42887	43343	286	Other Research-Related	2017	95040	NIBIB	95040	Private	TRUE	TRUE	NIBIB	9779030	43357	PA-15-083	4R00EB021349-03	R00
NCI	8889231	7/28/15 0:00	PA-11-197	5K99CA184397-02	5	K99	CA	184397	2		SCHMIDT MICHAEL K	9/1/14 0:00	11/30/15 0:00	Transition to Independence Study Section (I)[NCI-I]	11109221	33	MICROBIOLOGY/IMMUN/VIROLOGY	92530369	RN64EPNH8JC6	92530369	RN64EPNH8JC6	US	34.070199	-118.45102	577505	U_OF_CALIFORNIA_LOS_ANGELES	LOS ANGELES	CA	SCHOOLS OF MEDICINE	900952000	UNITED STATES	N	42248	42338	398	Other Research-Related	7/7/05 0:00	3/8/80 0:00	NCI	138861	Public	FALSE	FALSE	NCI	9182917	42444	PA-11-197	4R00CA184397-03	R00
NIGMS	8013311	12/13/10 0:00	PA-09-036	5K99GM089987-02	5	K99	GM	89987	2		CARTER ANTHONY D	1/15/10 0:00	7/31/11 0:00	ZGM1-BRT-9(KR)	9751535	2	BIOCHEMISTRY	50299031	K51LECU1G8N3	50299031	K51LECU1G8N3	US	29.717236	-95.402761	9291001	RICE_U	HOUSTON	TX	SCHOOLS OF ARTS AND SCIENCES	770051827	UNITED STATES	N	40544	40755	859	Other Research-Related	7/3/05 0:00	11/12/45 0:00	NIGMS	89802	Private	FALSE	FALSE	NIGMS	8288374	40749		4R00GM089987-03	R00
NIGMS	8703730	6/30/14 0:00	PA-11-197	5K99GM107113-02	5	K99	GM	107113	2		FLICKER PAULA F	7/19/13 0:00	7/31/15 0:00	ZGM1-TRN-X(KR)	11220770	5	MICROBIOLOGY/IMMUN/VIROLOGY	82359691	LN53LCFJFL45	82359691	LN53LCFJFL45	US	42.369697	-71.11193	3212901	HARVARD_U	CAMBRIDGE	MA	SCHOOLS OF ARTS AND SCIENCES	21385369	UNITED STATES	N	41821	42216	859	Other Research-Related	7/6/05 0:00	1/3/45 0:00	NIGMS	89489	Private	FALSE	FALSE	NIGMS	9111128	42216	PA-11-197	4R00GM107113-03	R00
NCI	9527371	2/22/18 0:00	PA-16-193	1K99CA218679-01A1	1	K99	CA	218679	1	A	SCHMIDT MICHAEL K	3/1/18 0:00	11/30/18 0:00	Transition to Independence Study Section (I)[NCI-I]	10517458	7	MISCELLANEOUS	1425594	E2NYLCDML6V1	1425594	E2NYLCDML6V1	US	42.359128	-71.093339	4911501	MASSACHUSETTS_INST_OF_TECH	CAMBRIDGE	MA	ORGANIZED RESEARCH UNITS	21421029	UNITED STATES	N	43160	43434	398	Other Research-Related	7/10/05 0:00	5/8/46 0:00	NCI	126503	Private	FALSE	FALSE	NCI	9817952	43448	PA-16-193	4R00CA218679-02	R00
NHLBI	8135032	40710	PA-09-036	5K99HL098459-02	5	K99	HL	98459	2		CARLSON DREW E	40422	41152	ZHL1-CSR-Z(M2)	9721881	7	NUTRITION	149617367	UNVDZNFA8R29	149617367	UNVDZNFA8R29	US	42.335306	-71.102775	3212904	HARVARD_SCH_OF_PUBLIC_HEALTH	BOSTON	MA	SCHOOLS OF PUBLIC HEALTH	21156028	UNITED STATES	N	40725	41152	837	Other Research-Related	2011	95296	NHLBI	95296	Private	FALSE	FALSE	NHLBI	8528154	41138	PA-11-197	4R00HL098459-03	R00
NINDS	9014571	42457	PA-14-042	5K99NS091538-02	5	K99	NS	91538	2		GUBITZ AMELIE	42095	42825	NST-2 Study Section [NST-2]	11168714	52	UnavaiLABle	627922248	ESJQL5U9JYM3	627922248	ESJQL5U9JYM3	US	32.875761	-117.239541	2384603	LUDWIG_INST_FOR_CANCER_RES_LTD	LA JOLLA	CA	Research Institutes	920930660	UNITED STATES	N	42461	42825	853	Other Research-Related	2016	93042	NINDS	93042	Private	FALSE	FALSE	NINDS	9324797	42611	PA-14-042	4R00NS091538-03	R00
NCI	7681266	8/17/09 0:00	PA-07-297	5K99CA134920-02	5	K99	CA	134920	2		SCHMIDT MICHAEL K	9/2/08 0:00	8/31/10 0:00	Institutional Training and Education Study Section (F)[NCI-F]	9221468	8	UnavaiLABle	73130411	FLJ7DQKLL226	73130411	FLJ7DQKLL226	US	42.363198	-71.068772	4907701	MASSACHUSETTS_GENERAL_HOSP	BOSTON	MA	Independent Hospitals	21142621	UNITED STATES	N	40057	40421	398	Other Research-Related	7/1/05 0:00	4/24/90 0:00	NCI	142560	Private	TRUE	TRUE	NCI	8121242	40422	PA-10-063	4R00CA134920-03	R00
NIDDK	9349495	8/17/17 0:00	PA-16-077	5K99DK111916-02	5	K99	DK	111916	2		HAFT CAROL R	9/8/16 0:00	12/31/17 0:00	Diabetes Endocrinology and Metabolic Diseases B Study Section[DDK-B]	11803899	7	UnavaiLABle	76580745	DPMGH9MG1X67	76580745	DPMGH9MG1X67	US	42.337593	-71.108279	1464901	DANA-FARBER_CANCER_INST	BOSTON	MA	Independent Hospitals	22155450	UNITED STATES	N	42979	43100	847	Other Research-Related	7/9/05 0:00	5/29/46 0:00	NIDDK	90000	Private	FALSE	FALSE	NIDDK	9644155	43173	PA-16-077	4R00DK111916-03	R00
NIAID	10240450	7/9/21	PA-19-130	5K99AI148598-02	5	K99	AI	148598	2		GONDRE-LEWIS TIMOTHY A	8/17/20	12/31/21	Allergy Immunology and Transplantation Research Committee[AITC]	11819599	12	UnavaiLABle	64931884	KUKXRCZ6NZC2	64931884	KUKXRCZ6NZC2	US	40.764045	-73.956024	5079202	SLOAN-KETTERING_INST_CAN_RES	NEW YORK	NY	Research Institutes	100656007	UNITED STATES	N	8/1/21	12/31/21	855	Other Research-Related	7/13/05 0:00	5/30/92 0:00	NIAID	106803	Private	FALSE	FALSE	NIAID	10621402	8/10/22	PA-19-130	4R00AI148598-03	R00
NHLBI	8500947	8/18/12 0:00	PA-09-036	5K99HL098695-02	5	K99	HL	98695	2		COLOMBINI-HATCH SANDRA	6/1/10 0:00	5/31/13 0:00	ZHL1-CSR-Z(O2)	9776729	3	INTERNAL MEDICINE/MEDICINE	43207562	FL6GV84CKN57	43207562	FL6GV84CKN57	US	41.310925	-72.926428	9420201	YALE_U	NEW HAVEN	CT	SCHOOLS OF MEDICINE	65208327	UNITED STATES	N	41061	41425	837	Other Research-Related	7/4/05 0:00	4/21/22 0:00	NHLBI	117720	Private	TRUE	TRUE	NHLBI	8539151	41491	PA-09-036	4R00HL098695-03	R00
NIMH	8492163	7/3/13 0:00	PA-11-197	5K99MH095867-02	5	K99	MH	95867	2		SARAMPOTE CHRISTOPHER S	7/1/12 0:00	6/30/14 0:00	ZMH1-ERB-L(03)	8737461	8	UnavaiLABle	73130411	FLJ7DQKLL226	73130411	FLJ7DQKLL226	US	42.363198	-71.068772	4907701	MASSACHUSETTS_GENERAL_HOSP	BOSTON	MA	Independent Hospitals	21142621	UNITED STATES	N	41456	41820	242	Other Research-Related	7/5/05 0:00	5/24/54 0:00	NIMH	92917	Private	TRUE	TRUE	NIMH	8882833	41866	PA-11-197	4R00MH095867-03	R00
NICHD	7324839	11/30/07 0:00	PA-06-133	5K99HD055030-02	5	K99	HD	55030	2		HUANG TERRY T-K	12/1/06 0:00	11/30/08 0:00	Pediatrics Study Section[CHHD-A]	7687732	7	PSYCHIATRY	1910777	FTMTDMBR29C7	1910777	FTMTDMBR29C7	US	39.325256	-76.605131	4134401	JOHNS_HOPKINS_U	BALTIMORE	MD	SCHOOLS OF MEDICINE	212182680	UNITED STATES	N	39417	39782	865	Other Research-Related	6/30/05 0:00	5/4/87 0:00	NICHD	68426	Private	TRUE	TRUE	NICHD	7744778	39814	PA-07-297	4R00HD055030-03	R00
NIEHS	7681751	9/1/09 0:00	PA-07-297	5K99ES016817-02	5	K99	ES	16817	2		SHREFFLER CAROL A	9/2/08 0:00	8/31/10 0:00	ZES1-LKB-C(K1)	9204472	1	PUBLIC HEALTH & PREV MEDICINE	41064767	DZ4YCZ3QSPR5	41064767	DZ4YCZ3QSPR5	US	39.129719	-84.520554	1523902	U_OF_CINCINNATI	CINCINNATI	OH	SCHOOLS OF MEDICINE	452210001	UNITED STATES	N	40057	40421	113	Other Research-Related	7/1/05 0:00	5/29/46 0:00	NIEHS	90000	public	TRUE	FALSE	NIEHS	8119200	40431	PA-07-297	4R00ES016817-03	R00
NCI	7469557	39525	PA-06-133	5K99CA126839-02	5	K99	CA	126839	2		SCHMIDT MICHAEL K	39276	39933	ZCA1-RTRB-2(J1)	8661105	8	UnavaiLABle	73130411	FLJ7DQKLL226	73130411	FLJ7DQKLL226	US	42.363198	-71.068772	4907701	MASSACHUSETTS_GENERAL_HOSP	BOSTON	MA	Independent Hospitals	21142621	UNITED STATES	N	39569	39933	398	Other Research-Related	2008	141750	NCI	141750	Private	TRUE	TRUE	NCI	7811244	39993	PA-06-133	4R00CA126839-03	R00
NHLBI	9145102	8/31/16 0:00	PA-14-042	5K99HL127181-02	5	K99	HL	127181	2		COLOMBINI-HATCH SANDRA	9/15/15 0:00	9/2/16 0:00	NHLBI Mentored Transition to Independence Study Section[MTI(JA)]	11195734	8	UnavaiLABle	73130411	FLJ7DQKLL226	73130411	FLJ7DQKLL226	US	42.363198	-71.068772	4907701	MASSACHUSETTS_GENERAL_HOSP	BOSTON	MA	Independent Hospitals	21142621	UNITED STATES	N	42614	42615	837	Other Research-Related	7/8/05 0:00	12/30/73 0:00	NHLBI	136601	Private	FALSE	FALSE	NHLBI	9377766	42727	PA-14-042	4R00HL127181-03	R00
NHLBI	9902524	4/2/20 0:00	PA-18-398	5K99HL143149-02	5	K99	HL	143149	2		LIDMAN KARIN FREDRIKSSON	4/1/19 0:00	3/31/21 0:00	NHLBI Mentored Transition to Independence Study Section[MTI(JA)]	14535967	8	UnavaiLABle	73130411	FLJ7DQKLL226	73130411	FLJ7DQKLL226	US	42.363198	-71.068772	4907701	MASSACHUSETTS_GENERAL_HOSP	BOSTON	MA	Independent Hospitals	21142621	UNITED STATES	N	43922	44286	837	Other Research-Related	7/12/05 0:00	7/4/94 0:00	NHLBI	107568	Private	TRUE	TRUE	NHLBI	10336180	44260	PA-18-398	4R00HL143149-03	R00
NIDDK	8678907	5/27/14 0:00	PA-11-197	5K99DK094977-02	5	K99	DK	94977	2		HAMILTON FRANK A	6/15/13 0:00	3/31/15 0:00	ZDK1-GRB-2(O2)M	10236788	3	INTERNAL MEDICINE/MEDICINE	42250712	GM1XX56LEP58	42250712	GM1XX56LEP58	US	39.953462	-75.193983	6463801	U_OF_PENNSYLVANIA	PHILADELPHIA	PA	SCHOOLS OF MEDICINE	191046205	UNITED STATES	N	41791	42094	847	Other Research-Related	7/6/05 0:00	5/29/46 0:00	NIDDK	90000	Private	TRUE	FALSE	NIDDK	9022126	42222	PA-11-197	4R00DK094977-03	R00
NHLBI	8720054	41796	PA-11-197	5K99HL114719-02	5	K99	HL	114719	2		SARKAR RITA	41501	42124	ZHL1-CSR-P(F2)	10313727	7	UnavaiLABle	30811269	QN6MS4VN7BD1	30811269	QN6MS4VN7BD1	US	42.336107	-71.107481	1080401	BRIGHAM_&_WOMENS_HOSP	BOSTON	MA	Independent Hospitals	21156110	UNITED STATES	N	41821	42124	837	Other Research-Related	2014	133110	NHLBI	133110	Private	TRUE	TRUE	NHLBI	9023825	42121	PA-11-197	4R00HL114719-03	R00
NHLBI	7924751	6/29/10 0:00	PA-07-297	5K99HL097021-02	5	K99	HL	97021	2		COMMARATO MICHAEL	9/1/09 0:00	7/31/11 0:00	ZHL1-CSR-Z(M3)	9645847	13	INTERNAL MEDICINE/MEDICINE	621889815	QHF5ZZ114M72	621889815	QHF5ZZ114M72	US	40.8415	-73.9414	1833205	COLUMBIA_U_HEALTH_SCI	NEW YORK	NY	SCHOOLS OF MEDICINE	100323725	UNITED STATES	N	40391	40755	837	Other Research-Related	7/2/05 0:00	5/29/46 0:00	NHLBI	90000	Private	FALSE	FALSE	NHLBI	8291473	40774	PA-07-297	4R00HL097021-03	R00
NICHD	8723869	8/11/14 0:00	PA-11-197	5K99HD074649-02	5	K99	HD	74649	2		FREUND LISA S	9/1/13 0:00	9/23/15 0:00	Pediatrics Study Section[CHHD-A]	10458874	8	UnavaiLABle	73130411	FLJ7DQKLL226	73130411	FLJ7DQKLL226	US	42.363198	-71.068772	4907701	MASSACHUSETTS_GENERAL_HOSP	BOSTON	MA	Independent Hospitals	21142621	UNITED STATES	N	41883	42270	865	Other Research-Related	7/6/05 0:00	1/31/74 0:00	NICHD	136633	Private	TRUE	TRUE	NICHD	9128186	42270	PA-11-197	4R00HD074649-03	R00
NICHD	10269931	8/3/21	PA-19-130	5K99HD101653-02	5	K99	HD	101653	2		ILEKIS JOHN V	9/24/20	8/31/22	Obstetrics and Maternal-Fetal Biology Study Section[CHHD-B]	14978294	3	OBSTETRICS & GYNECOLOGY	43207562	FL6GV84CKN57	43207562	FL6GV84CKN57	US	41.310925	-72.926428	9420201	YALE_U	NEW HAVEN	CT	SCHOOLS OF MEDICINE	65208327	UNITED STATES	N	9/1/21	8/31/22	865	Other Research-Related	7/13/05 0:00	8/15/47 0:00	NICHD	126967	Private	TRUE	TRUE	NICHD	10672601	8/19/22	PA-19-130	4R00HD101653-03	R00
NICHD	9264003	5/26/17 0:00	PA-15-083	5K99HD084749-02	5	K99	HD	84749	2		MILLER BRETT	6/1/16 0:00	8/31/19 0:00	Biobehavioral and Behavioral Sciences Study Section[CHHD-H]	11211696	18	PEDIATRICS	9214214	HJD6G4D6TJY5	9214214	HJD6G4D6TJY5	US	37.426852	-122.17047	8046501	STANFORD_U	STANFORD	CA	SCHOOLS OF MEDICINE	943052004	UNITED STATES	N	42887	43708	865	Other Research-Related	7/9/05 0:00	7/31/49 0:00	NICHD	127683	Private	TRUE	TRUE	NICHD	9976651	43692	PA-15-083	4R00HD084749-03	R00
NICHD	9464551	4/2/18 0:00	PA-16-193	5K99HD088675-02	5	K99	HD	88675	2		TAYMANS SUSAN	4/4/17 0:00	8/31/19 0:00	Developmental Biology Study Section[CHHD-C]	14198133	12	ANATOMY/CELL BIOLOGY	121911077	M5SZJ6VHUHN8	121911077	M5SZJ6VHUHN8	US	40.669895	-73.974354	5998304	NEW_YORK_U_SCH_OF_MED	NEW YORK	NY	SCHOOLS OF MEDICINE	10016	UNITED STATES	N	43191	43708	865	Other Research-Related	7/10/05 0:00	9/22/26 0:00	NICHD	119335	Private	FALSE	FALSE	NICHD	9939922	43713	PA-16-193	4R00HD088675-03	R00
NIMH	8788444	10/24/14 0:00	PA-11-197	5K99MH102355-02	5	K99	MH	102355	2		CHAVEZ MARK	12/26/13 0:00	12/31/14 0:00	ZMH1-ERB-L(05)	9659655	5	UnavaiLABle	46514535	MCKWJYCWNVN3	46514535	MCKWJYCWNVN3	US	42.393619	-71.191142	1876801	MCLEAN_HOSP	BELMONT	MA	Independent Hospitals	24781064	UNITED STATES	N	41974	42004	242	Other Research-Related	7/7/05 0:00	6/22/88 0:00	NIMH	32316	Private	FALSE	FALSE	NIMH	8994068	42100	PA-11-197	4R00MH102355-03	R00
NINDS	8828316	6/8/15 0:00	PA-11-197	5K99NS087098-02	5	K99	NS	87098	2		TALLEY EDMUND M	6/1/14 0:00	4/30/16 0:00	NST-2 Study Section [NST-2]	10649345	7	BIOLOGY	47006379	JDLVAVGYJQ21	47006379	JDLVAVGYJQ21	US	42.335672	-71.104237	3212902	HARVARD_MED_SCH	BOSTON	MA	SCHOOLS OF MEDICINE	21201616	UNITED STATES	N	42156	42490	853	Other Research-Related	7/7/05 0:00	11/27/33 0:00	NINDS	85434	Private	FALSE	FALSE	NINDS	9232522	42480	PA-11-197	4R00NS087098-03	R00
NICHD	9553838	7/31/18 0:00	PA-16-193	5K99HD092623-02	5	K99	HD	92623	2		HENKEN DEBORAH B	9/30/17 0:00	1/31/21 0:00	Developmental Biology Study Section[CHHD-C]	14723019	7	BIOLOGY	47006379	JDLVAVGYJQ21	47006379	JDLVAVGYJQ21	US	42.335672	-71.104237	3212902	HARVARD_MED_SCH	BOSTON	MA	SCHOOLS OF MEDICINE	21201616	UNITED STATES	N	43344	44227	865	Other Research-Related	7/10/05 0:00	3/31/50 0:00	NICHD	127926	Private	FALSE	FALSE	NICHD	10319256	##########	PA-16-193	4R00HD092623-03	R00
NIMH	9271247	3/20/17 0:00	PA-15-083	5K99MH109633-02	5	K99	MH	109633	2		DRISCOLL JAMIE	5/10/16 0:00	8/31/18 0:00	ZMH1-ERB-S(01)	11674940	12	PSYCHIATRY	94878337	KMH5K9V7S518	94878337	KMH5K9V7S518	US	37.767442	-122.413937	577508	U_OF_CALIFORNIA_SAN_FRANCISCO	SAN FRANCISCO	CA	SCHOOLS OF MEDICINE	941432510	UNITED STATES	N	42856	43343	242	Other Research-Related	7/9/05 0:00	11/30/31 0:00	NIMH	121230	public	FALSE	FALSE	NIMH	9726217	43335	PA-15-083	4R00MH109633-03	R00
NINR	10145798	8/9/21	PA-19-129	5K99NR019124-02	5	K99	NR	19124	2		BANKS DAVID	4/15/20	7/31/22	Nursing Science Review Committee[NRRC(76)]	14510663	12	OTHER HEALTH PROFESSIONS	60217502	YNT8TCJH8FQ8	60217502	YNT8TCJH8FQ8	US	40.7607	-73.9603	1514803	WEILL_MED_COLL_OF_CORNELL_U	NEW YORK	NY	SCHOOLS OF MEDICINE	100654805	UNITED STATES	N	8/1/21	7/31/22	361	Other Research-Related	7/13/05 0:00	12/4/39 0:00	NINR	87632	Private	TRUE	FALSE	NINR	10607937	7/6/22	PA-19-129	4R00NR019124-03	R00
NIMH	9581675	8/7/18 0:00	PA-16-193	1K99MH117165-01	1	K99	MH	117165	1		VAN'T VEER ASHLEE V	8/7/18 0:00	8/15/19 0:00	ZMH1-ERB-M(06)	9776542	7	GENETICS	605799469	HD1WMN6945W6	605799469	HD1WMN6945W6	US	47.660307	-122.315168	9087701	U_OF_WASHINGTON	SEATTLE	WA	SCHOOLS OF MEDICINE	981959472	UNITED STATES	N	43319	43692	242	Other Research-Related	7/10/05 0:00	3/6/52 0:00	NIMH	92108	Public	TRUE	FALSE	NIMH	9980543	43703	PA-16-193	4R00MH117165-02	R00
NCI	8306718	7/31/12 0:00	PA-10-063	5K99CA154608-02	5	K99	CA	154608	2		SCHMIDT MICHAEL K	8/1/11 0:00	5/31/13 0:00	Institutional Training and Education Study Section (F)[NCI-F]	10123243	7	UnavaiLABle	78200995	HMSNCM57QNR5	78200995	HMSNCM57QNR5	US	47.627342	-122.331593	861001	FRED_HUTCHINSON_CANCER_RES_CTR	SEATTLE	WA	Research Institutes	981094433	UNITED STATES	N	41122	41425	398	Other Research-Related	7/4/05 0:00	10/8/64 0:00	NCI	169755	Private	TRUE	TRUE	NCI	8639793	41443	PA-10-063	4R00CA154608-03	R00
NIDDK	8301550	9/14/12 0:00	PA-10-063	5K99DK088962-02	5	K99	DK	88962	2		SERRANO JOSE	9/1/11 0:00	8/31/13 0:00	Digestive Diseases and Nutrition C Study Section[DDK-C]	10199097	8	UnavaiLABle	73130411	FLJ7DQKLL226	73130411	FLJ7DQKLL226	US	42.363198	-71.068772	4907701	MASSACHUSETTS_GENERAL_HOSP	BOSTON	MA	Independent Hospitals	21142621	UNITED STATES	N	41153	41517	847	Other Research-Related	7/4/05 0:00	4/5/39 0:00	NIDDK	87389	Private	TRUE	TRUE	NIDDK	8778730	41625	PA-10-063	4R00DK088962-03	R00
NIDDK	7595903	1/28/09 0:00	PA-07-297	5K99DK080942-02	5	K99	DK	80942	2		PODSKALNY JUDITH M	4/1/08 0:00	2/28/10 0:00	Digestive Diseases and Nutrition C Study Section[DDK-C]	9086616	8	UnavaiLABle	73130411	FLJ7DQKLL226	73130411	FLJ7DQKLL226	US	42.363198	-71.068772	4907701	MASSACHUSETTS_GENERAL_HOSP	BOSTON	MA	Independent Hospitals	21142621	UNITED STATES	N	39873	40237	847	Other Research-Related	7/1/05 0:00	5/28/46 0:00	NIDDK	89999	Private	TRUE	TRUE	NIDDK	7988842	40237	PA-07-297	4R00DK080942-03	R00
NIEHS	7249151	9/18/07 0:00	PA-06-133	1K99ES016723-01	1	K99	ES	16723	1		SHREFFLER CAROL A	9/18/07 0:00	8/31/08 0:00	Kidney Urologic and Hematologic Diseases D Study Section[DDK-D]	8433629	7	UnavaiLABle	30811269	QN6MS4VN7BD1	30811269	QN6MS4VN7BD1	US	42.336107	-71.107481	1080401	BRIGHAM_&_WOMENS_HOSP	BOSTON	MA	Independent Hospitals	21156110	UNITED STATES	N	39343	39691	113	Other Research-Related	6/29/05 0:00	5/29/46 0:00	NIEHS	90000	Private	TRUE	TRUE	NIEHS	7667029	39703	PA-06-133	4R00ES016723-02	R00
NCI	9515911	43299	PA-16-193	5K99CA218832-02	5	K99	CA	218832	2		SCHMIDT MICHAEL K	42948	43677	Transition to Independence Study Section (I)[NCI-I]	12597253	8	UnavaiLABle	73130411	FLJ7DQKLL226	73130411	FLJ7DQKLL226	US	42.363198	-71.068772	4907701	MASSACHUSETTS_GENERAL_HOSP	BOSTON	MA	Independent Hospitals	21142621	UNITED STATES	N	43313	43677	398	Other Research-Related	2018	180360	NCI	180360	Private	TRUE	FALSE	NCI	9969642	43671	PA-16-193	4R00CA218832-03	R00
NIA	9773885	5/20/19 0:00	PA-16-193	5K99AG059893-02	5	K99	AG	59893	2		MACKIEWICZ MIROSLAW	9/1/18 0:00	5/31/20 0:00	Basic Neuroscience of Aging Study Section[NIA-N]	14497047	8	UnavaiLABle	73130411	FLJ7DQKLL226	73130411	FLJ7DQKLL226	US	42.363198	-71.068772	4907701	MASSACHUSETTS_GENERAL_HOSP	BOSTON	MA	Independent Hospitals	21142621	UNITED STATES	N	43617	43982	866	Other Research-Related	7/11/05 0:00	5/3/73 0:00	NIA	136360	Private	TRUE	TRUE	NIA	10142789	43972	PA-16-193	4R00AG059893-03	R00
NCI	8731188	8/12/14 0:00	PA-11-197	5K99CA178188-02	5	K99	CA	178188	2		SCHMIDT MICHAEL K	9/6/13 0:00	11/30/14 0:00	Transition to Independence Study Section (I)[NCI-I]	10406289	4	BIOLOGY	608195277	D3LHU66KBLD5	608195277	D3LHU66KBLD5	US	35.9316	-79.057377	578206	U_OF_NORTH_CAROLINA_CHAPEL_HILL	CHAPEL HILL	NC	SCHOOLS OF ARTS AND SCIENCES	275995023	UNITED STATES	N	41883	41973	398	Other Research-Related	7/6/05 0:00	7/30/59 0:00	NCI	94810	Public	FALSE	FALSE	NCI	8977561	41995	PA-11-197	4R00CA178188-03	R00
NHLBI	9261590	3/1/17 0:00	PA-15-083	5K99HL131817-02	5	K99	HL	131817	2		COLOMBINI-HATCH SANDRA	4/15/16 0:00	4/24/17 0:00	NHLBI Mentored Transition to Independence Study Section[MTI(JA)]	9489774	12	INTERNAL MEDICINE/MEDICINE	94878337	KMH5K9V7S518	94878337	KMH5K9V7S518	US	37.767442	-122.413937	577508	U_OF_CALIFORNIA_SAN_FRANCISCO	SAN FRANCISCO	CA	SCHOOLS OF MEDICINE	941432510	UNITED STATES	N	42795	42849	837	Other Research-Related	7/9/05 0:00	10/13/36 0:00	NHLBI	159533	public	FALSE	FALSE	NHLBI	9513132	42921	PA-15-083	4R00HL131817-03	R00
NIAAA	10251894	8/31/21	PA-19-130	5K99AA028049-02	5	K99	AA	28049	2		ZHA WENXING	9/5/20	8/31/22	ZAA1-AA(02)	12083568	13	OTHER HEALTH PROFESSIONS	621889815	QHF5ZZ114M72	621889815	QHF5ZZ114M72	US	40.8415	-73.9414	1833205	COLUMBIA_U_HEALTH_SCI	NEW YORK	NY	SCHOOLS OF NURSING	100323725	UNITED STATES	N	9/1/21	8/31/22	273	Other Research-Related	7/13/05 0:00	2/25/31 0:00	NIAAA	157476	Private	FALSE	FALSE	NIAAA	10655846	8/13/22	PA-19-130	4R00AA028049-03	R00
NIMH	10118222	2/18/21	PA-19-130	5K99MH121534-02	5	K99	MH	121534	2		DRISCOLL JAMIE	3/3/20	2/28/22	ZMH1-ERB-Q(07)	12482636	12	INTERNAL MEDICINE/MEDICINE	94878337	KMH5K9V7S518	94878337	KMH5K9V7S518	US	37.767442	-122.413937	577508	U_OF_CALIFORNIA_SAN_FRANCISCO	SAN FRANCISCO	CA	SCHOOLS OF MEDICINE	941432510	UNITED STATES	N	3/1/21	2/28/22	242	Other Research-Related	7/13/05 0:00	12/30/90 0:00	NIMH	106286	public	FALSE	FALSE	NIMH	10611017	9/3/22	PA-19-130	4R00MH121534-03	R00
NCI	10039557	8/10/20 0:00	PA-19-130	1K99CA252001-01	1	K99	CA	252001	1		BOULANGER-ESPEUT CORINNE A	9/1/20 0:00	6/30/21 0:00	Transition to Independence Study Section (I)[NCI-I]	12485491	18	NEUROLOGY	9214214	HJD6G4D6TJY5	9214214	HJD6G4D6TJY5	US	37.426852	-122.17047	8046501	STANFORD_U	STANFORD	CA	SCHOOLS OF MEDICINE	943052004	UNITED STATES	N	44075	44377	398	Other Research-Related	7/12/05 0:00	1/17/34 0:00	NCI	158533	Private	FALSE	FALSE	NCI	10523145	12/14/21	PA-19-130	4R00CA252001-02	R00
NIDA	8828659	6/12/15 0:00	PA-11-197	5K99DA037276-02	5	K99	DA	37276	2		CRUMP ARIA	7/1/14 0:00	7/31/16 0:00	ZDA1-EXL-T(02)S	11423067	7	PSYCHIATRY	605799469	HD1WMN6945W6	605799469	HD1WMN6945W6	US	47.660307	-122.315168	9087701	U_OF_WASHINGTON	SEATTLE	WA	SCHOOLS OF MEDICINE	981959472	UNITED STATES	N	42186	42582	279	Other Research-Related	7/7/05 0:00	5/25/69 0:00	NIDA	171445	Public	TRUE	FALSE	NIDA	9282101	42587	PA-11-197	4R00DA037276-03	R00
NIDCR	10104603	3/24/21	PAR-19-144	1K99DE030084-01	1	K99	DE	30084	1		BROWN ANISSA F	4/1/21	3/31/23	NIDCR Special Grants Review Committee[DSR]	12405885	7	UnavaiLABle	76580745	DPMGH9MG1X67	76580745	DPMGH9MG1X67	US	42.337593	-71.108279	1464901	DANA-FARBER_CANCER_INST	BOSTON	MA	Independent Hospitals	22155450	UNITED STATES	N	4/1/21	3/31/22	121	Other Research-Related	7/13/05 0:00	8/12/69 0:00	NIDCR	135000	Private	FALSE	FALSE	NIDCR	10628513	8/17/22	PAR-19-144	4R00DE030084-03	R00
NICHD	8840289	4/16/15 0:00	PA-11-197	5K99HD077058-02	5	K99	HD	77058	2		FREUND LISA S	5/1/14 0:00	10/31/16 0:00	Biobehavioral and Behavioral Sciences Study Section[CHHD-H]	9559979	7	MISCELLANEOUS	1910777	FTMTDMBR29C7	1910777	FTMTDMBR29C7	US	39.325256	-76.605131	4134401	JOHNS_HOPKINS_U	BALTIMORE	MD	SCHOOLS OF PUBLIC HEALTH	212182680	UNITED STATES	N	42125	42674	865	Other Research-Related	7/7/05 0:00	1/8/47 0:00	NICHD	126748	Private	FALSE	TRUE	NICHD	9329802	42625	PA-11-197	4R00HD077058-03	R00
NINDS	8048075	3/17/11 0:00	PA-09-036	5K99NS069788-02	5	K99	NS	69788	2		BABCOCK DEBRA J	4/1/10 0:00	2/14/12 0:00	ZNS1-SRB-M(73)	7844690	13	NONE	41544081	Y8CWNJRCNN91	41544081	Y8CWNJRCNN91	US	40.116857	-88.228755	577704	U_OF_ILLINOIS_AT_URBANA-CHAMPAIGN	CHAMPAIGN	IL	ORGANIZED RESEARCH UNITS	618207473	UNITED STATES	N	40634	40953	853	Other Research-Related	7/3/05 0:00	5/29/46 0:00	NINDS	90000	Public	FALSE	FALSE	NINDS	8413082	40947		4R00NS069788-03	R00
NIMH	10011838	8/6/20 0:00	PA-19-130	5K99MH119314-02	5	K99	MH	119314	2		CHAVEZ MARK	9/6/19 0:00	2/28/22 0:00	ZMH1-ERB-Q(07)	14977194	33	NEUROLOGY	92530369	RN64EPNH8JC6	92530369	RN64EPNH8JC6	US	34.070199	-118.45102	577505	U_OF_CALIFORNIA_LOS_ANGELES	LOS ANGELES	CA	SCHOOLS OF MEDICINE	900952000	UNITED STATES	N	44075	44620	242	Other Research-Related	7/12/05 0:00	8/10/81 0:00	NIMH	102857	Public	FALSE	FALSE	NIMH	10609128	5/13/22	PA-19-130	4R00MH119314-03	R00
NLM	8978947	1/31/15 0:00	PA-14-078	7K99LM011575-02	7	K99	LM	11575	2		RAVICHANDRAN VEERASAMY	2/1/15 0:00	1/31/16 0:00	Biomedical Informatics Library and Data Sciences Review Committee[BLR]	11387121	8	UnavaiLABle	73130411	FLJ7DQKLL226	73130411	FLJ7DQKLL226	US	42.363198	-71.068772	4907701	MASSACHUSETTS_GENERAL_HOSP	BOSTON	MA	Independent Hospitals	21142621	UNITED STATES	N	42036	42400	879	Other Research-Related	7/7/05 0:00	9/6/27 0:00	NLM	83160	Private	TRUE	TRUE	NLM	9187058	42374	PA-14-078	4R00LM011575-03	R00
NINDS	8634822	4/4/14 0:00	PA-11-197	5K99NS082381-02	5	K99	NS	82381	2		FOUNTAIN JANE W	4/1/13 0:00	8/31/14 0:00	NST-2 Study Section [NST-2]	10369953	1	SURGERY	5421136	ZUE9HKT2CLC9	5421136	ZUE9HKT2CLC9	US	41.789554	-87.601172	1413601	U_OF_CHICAGO	CHICAGO	IL	SCHOOLS OF MEDICINE	606372612	UNITED STATES	N	41730	41882	853	Other Research-Related	7/6/05 0:00	4/4/36 0:00	NINDS	86293	private	FALSE	FALSE	NINDS	8929922	41908	PA-11-197	4R00NS082381-03	R00
NHGRI	10017284	9/4/20 0:00	PA-18-398	5K99HG010499-02	5	K99	HG	10499	2		BOYER JOY	9/12/19 0:00	12/31/20 0:00	Special Emphasis Panel[ZRG1-SEIR-B(80)]	15053140	7	MISCELLANEOUS	1910777	FTMTDMBR29C7	1910777	FTMTDMBR29C7	US	39.325256	-76.605131	4134401	JOHNS_HOPKINS_U	BALTIMORE	MD	SCHOOLS OF PUBLIC HEALTH	212182680	UNITED STATES	N	44075	44196	172	Other Research-Related	7/12/05 0:00	1/27/49 0:00	NHGRI	54450	Private	FALSE	FALSE	NHGRI	10307826	##########	PA-18-398	4R00HG010499-03	R00
NCI	9663203	2/6/19 0:00	PA-16-193	5K99CA226399-02	5	K99	CA	226399	2		SCHMIDT MICHAEL K	3/6/18 0:00	2/29/20 0:00	Transition to Independence Study Section (I)[NCI-I]	14602791	12	BIOLOGY	71037113	LHGDNJMZ64Y1	71037113	LHGDNJMZ64Y1	US	40.763746	-73.955386	7056601	ROCKEFELLER_U	NEW YORK	NY	GRADUATE SCHOOLS	100656399	UNITED STATES	N	43525	43890	398	Other Research-Related	7/11/05 0:00	5/15/02 0:00	NCI	146963	Private	TRUE	FALSE	NCI	10073763	43931	PA-16-193	4R00CA226399-03	R00
NICHD	9119610	7/1/16 0:00	PA-14-042	5K99HD084746-02	5	K99	HD	84746	2		MILLER BRETT	8/1/15 0:00	7/31/17 0:00	Pediatrics Study Section[CHHD-A]	11950614	3	SOCIAL SCIENCES	42250712	GM1XX56LEP58	42250712	GM1XX56LEP58	US	39.953462	-75.193983	6463801	U_OF_PENNSYLVANIA	PHILADELPHIA	PA	SCHOOLS OF ARTS AND SCIENCES	191046205	UNITED STATES	N	42583	42947	865	Other Research-Related	7/8/05 0:00	6/24/59 0:00	NICHD	131298	Private	FALSE	FALSE	NICHD	9535531	42985	PA-14-042	4R00HD084746-03	R00
NIGMS	7512028	6/30/08 0:00	PA-06-133	1K99GM085136-01	1	K99	GM	85136	1		DEATHERAGE, JAMES F	7/1/08 0:00	6/30/10 0:00	ZGM1-BRT-9(KR)	9221954	18	BIOLOGY	9214214	HJD6G4D6TJY5	9214214	HJD6G4D6TJY5	US	37.426852	-122.17047	8046501	STANFORD_U	STANFORD	CA	SCHOOLS OF MEDICINE	943052004	UNITED STATES	N	39630	39994	859	Other Research-Related	6/30/05 0:00	5/29/46 0:00	NIGMS	90000	Private	FALSE	FALSE	NIDDK	10178327	44001	PA-18-398	4R00DK119412-03	R00
NIBIB	9747294	7/24/19 0:00	PA-16-193	5K99EB023993-02	5	K99	EB	23993	2		KING RANDY LEE	8/1/18 0:00	7/31/20 0:00	ZEB1-OSR-E(O1)	12055249	8	UnavaiLABle	73130411	FLJ7DQKLL226	73130411	FLJ7DQKLL226	US	42.363198	-71.068772	4907701	MASSACHUSETTS_GENERAL_HOSP	BOSTON	MA	Independent Hospitals	21142621	UNITED STATES	N	43678	44043	286	Other Research-Related	7/11/05 0:00	1/22/60 0:00	NIBIB	94986	Private	TRUE	TRUE	NIBIB	10212518	44064	PA-16-193	4R00EB023993-03	R00
NIGMS	10324685	1/20/21	PA-18-398	3K99GM131024-02S1	3	K99	GM	131024	2	S	KEANE-MYERS ANDREA	2/1/19	1/31/22	ZGM1-TWD-8(KR)	12550387	18	BIOLOGY	9214214	HJD6G4D6TJY5	9214214	HJD6G4D6TJY5	US	37.426852	-122.17047	8046501	STANFORD_U	STANFORD	CA	SCHOOLS OF ARTS AND SCIENCES	943052004	UNITED STATES	N	2/1/20	1/31/22	859	Other Research-Related	7/13/05 0:00	2/9/25 0:00	NIGMS	82221	Private	TRUE	FALSE	NIGMS	10543602	6/17/22	PA-18-398	4R00GM131024-03	R00
NINDS	7596204	4/1/09 0:00	PA-07-297	5K99NS062089-02	5	K99	NS	62089	2		SUTHERLAND MARGARET L	4/1/08 0:00	10/31/09 0:00	ZNS1-SRB-M(52)	9095417	3	GENETICS	43207562	FL6GV84CKN57	43207562	FL6GV84CKN57	US	41.310925	-72.926428	9420201	YALE_U	NEW HAVEN	CT	SCHOOLS OF MEDICINE	65208327	UNITED STATES	N	39904	40117	853	Other Research-Related	7/1/05 0:00	5/29/46 0:00	NINDS	90000	Private	FALSE	FALSE	NINDS	7934972	40141	PA-09-036	4R00NS062089-03	R00
NIA	10166757	6/17/21	PA-19-130	5K99AG065500-02	5	K99	AG	65500	2		GUO MAX	6/1/20	5/31/23	Biological Aging Study Section[NIA-B]	15797744	3	ANATOMY/CELL BIOLOGY	42250712	GM1XX56LEP58	42250712	GM1XX56LEP58	US	39.953462	-75.193983	6463801	U_OF_PENNSYLVANIA	PHILADELPHIA	PA	SCHOOLS OF MEDICINE	191046205	UNITED STATES	N	6/1/21	5/31/23	866	Other Research-Related	7/13/05 0:00	3/20/72 0:00	NIA	99427	Private	FALSE	FALSE	NHLBI	8503656	41142	PA-07-297	4R00HL095649-03	R00
NIA	8316123	7/13/12 0:00	PA-10-063	5K99AG039512-02	5	K99	AG	39512	2		MURTHY MAHADEV	8/15/11 0:00	7/31/13 0:00	Biological Aging Study Section[NIA-B]	10376640	8	UnavaiLABle	73130411	FLJ7DQKLL226	73130411	FLJ7DQKLL226	US	42.363198	-71.068772	4907701	MASSACHUSETTS_GENERAL_HOSP	BOSTON	MA	Independent Hospitals	21142621	UNITED STATES	N	41122	41486	866	Other Research-Related	7/4/05 0:00	9/28/47 0:00	NIA	90487	Private	TRUE	TRUE	NIA	8732113	41537	PA-10-063	4R00AG039512-03	R00
AHRQ	8631059	3/5/14 0:00	RFA-HS-12-007	5K99HS022193-02	5	K99	HS	22193	2		WILLIS TAMARA	3/5/13 0:00	2/28/15 0:00	ZHS1-HSR-C(01)	11470412	7	UnavaiLABle	30811269	QN6MS4VN7BD1	30811269	QN6MS4VN7BD1	US	42.336107	-71.107481	1080401	BRIGHAM_&_WOMENS_HOSP	BOSTON	MA	Independent Hospitals	21156110	UNITED STATES	N	41699	42063	226	Other Research-Related	7/6/05 0:00	9/13/18 0:00	AHRQ	152928	Private	TRUE	TRUE	AHRQ	8999126	42083	RFA-HS-12-007	4R00HS022193-03	R00
NINDS	7941845	9/1/10 0:00	PA-09-036	5K99NS067066-02	5	K99	NS	67066	2		SUTHERLAND MARGARET L	9/30/09 0:00	8/31/11 0:00	NST-2 Study Section [NST-2]	9758097	7	UnavaiLABle	76593722	Z1L9F1MM1RY3	76593722	Z1L9F1MM1RY3	US	42.337481	-71.104964	1504801	BOSTON_CHILDRENS_HOSP	BOSTON	MA	Independent Hospitals	21155724	UNITED STATES	N	40422	40786	853	Other Research-Related	7/2/05 0:00	5/29/46 0:00	NINDS	90000	Private	FALSE	FALSE	NINDS	8385740	40883	PA-11-197	4R00NS067066-03	R00
NHLBI	8122284	8/2/11 0:00	PA-09-036	5K99HL103975-02	5	K99	HL	103975	2		WELNIAK LISBETH A	8/9/10 0:00	6/30/12 0:00	ZHL1-CSR-Z(M2)	1890706	1	INTERNAL MEDICINE/MEDICINE	68552207	L6NFUM28LQM5	68552207	L6NFUM28LQM5	US	38.664368	-90.323797	9083901	WASHINGTON_U	SAINT LOUIS	MO	SCHOOLS OF MEDICINE	631304862	UNITED STATES	N	40725	41090	837	Other Research-Related	7/3/05 0:00	6/1/32 0:00	NHLBI	121414	Private	TRUE	TRUE	NHLBI	8464361	41136		4R00HL103975-03	R00
NHLBI	8534812	5/30/13 0:00	PA-11-197	5K99HL112724-02	5	K99	HL	112724	2		CARLSON DREW E	8/21/12 0:00	11/30/14 0:00	ZHL1-CSR-P(F1)	10508160	7	UnavaiLABle	30811269	QN6MS4VN7BD1	30811269	QN6MS4VN7BD1	US	42.336107	-71.107481	1080401	BRIGHAM_&_WOMENS_HOSP	BOSTON	MA	Independent Hospitals	21156110	UNITED STATES	N	41426	41973	837	Other Research-Related	7/5/05 0:00	3/22/62 0:00	NHLBI	132300	Private	TRUE	TRUE	NHLBI	9000214	42172	PA-11-197	4R00HL112724-03	R00
NICHD	7841117	2/2/10 0:00	PA-09-036	1K99HD063961-01	1	K99	HD	63961	1		MOFENSON LYNNE M	2/1/10 0:00	9/23/10 0:00	AIDS Clinical Studies and Epidemiology Study Section[ACE]	9285978	4	PUBLIC HEALTH & PREV MEDICINE	608195277	D3LHU66KBLD5	608195277	D3LHU66KBLD5	US	35.9316	-79.057377	578206	U_OF_NORTH_CAROLINA_CHAPEL_HILL	CHAPEL HILL	NC	SCHOOLS OF PUBLIC HEALTH	275995023	UNITED STATES	N	40210	40444	865	Other Research-Related	7/2/05 0:00	1/2/01 0:00	NICHD	73417	Public	FALSE	FALSE	NICHD	8145469	40445		4R00HD063961-02	R00
NIDA	8889651	6/23/15 0:00	PA-11-197	5K99DA037928-02	5	K99	DA	37928	2		LIN YU	7/15/14 0:00	7/31/16 0:00	ZDA1-EXL-T(01)	10587552	8	UnavaiLABle	73130411	FLJ7DQKLL226	73130411	FLJ7DQKLL226	US	42.363198	-71.068772	4907701	MASSACHUSETTS_GENERAL_HOSP	BOSTON	MA	Independent Hospitals	21142621	UNITED STATES	N	42186	42582	279	Other Research-Related	7/7/05 0:00	6/7/12 0:00	NIDA	187164	Private	TRUE	TRUE	NIDA	9284574	42597	PA-11-197	4R00DA037928-03	R00
NIBIB	10206140	7/20/21	PAR-18-814	5K99EB029343-02	5	K99	EB	29343	2		DUAN QI	7/1/20	6/30/22	ZNS1-SRB-X(06)	11861940	1	RADIATION-DIAGNOSTIC/ONCOLOGY	68552207	L6NFUM28LQM5	68552207	L6NFUM28LQM5	US	38.664368	-90.323797	9083901	WASHINGTON_U	SAINT LOUIS	MO	SCHOOLS OF MEDICINE	631304862	UNITED STATES	N	7/1/21	6/30/22	286	Other Research-Related	7/13/05 0:00	10/6/45 0:00	NIBIB	126289	Private	TRUE	TRUE	NIBIB	10630851	9/7/22	PAR-18-814	4R00EB029343-03	R00
NIDA	9525944	5/16/18 0:00	PA-16-193	5K99DA044838-02	5	K99	DA	44838	2		LIN YU	7/15/17 0:00	6/30/19 0:00	ZDA1-SXM-M(02)S	9132016	7	PUBLIC HEALTH & PREV MEDICINE	1910777	FTMTDMBR29C7	1910777	FTMTDMBR29C7	US	39.325256	-76.605131	4134401	JOHNS_HOPKINS_U	BALTIMORE	MD	SCHOOLS OF PUBLIC HEALTH	212182680	UNITED STATES	N	43282	43646	279	Other Research-Related	7/10/05 0:00	2/20/77 0:00	NIDA	137749	Private	FALSE	TRUE	NIDA	9939863	43725	PA-16-193	4R00DA044838-03	R00
NIA	10190613	4/26/21	PA-20-188	1K99AG071838-01	1	K99	AG	71838	1		SIMMONS JANINE M	5/1/21	4/30/23	Behavior and Social Science of Aging Study Section[NIA-S]	15017345	7	PUBLIC HEALTH & PREV MEDICINE	5436803	KG76WYENL5K1	5436803	KG76WYENL5K1	US	42.050479	-87.680046	6144650	NORTHWESTERN_U	CHICAGO	IL	SCHOOLS OF MEDICINE	606114579	UNITED STATES	N	5/1/21	4/30/22	866	Other Research-Related	7/13/05 0:00	2/2/79 0:00	NIA	101937	Private	FALSE	FALSE	NIA	10628236	8/2/22	PA-20-188	4R00AG071838-03	R00
NIGMS	8421393	41295	PA-11-197	1K99GM104166-01	1	K99	GM	104166	1		HAMLET MICHELLE R	41306	41670	ZGM1-BRT-X(KR)	10097855	7	MISCELLANEOUS	1425594	E2NYLCDML6V1	1425594	E2NYLCDML6V1	US	42.359128	-71.093339	4911501	MASSACHUSETTS_INST_OF_TECH	CAMBRIDGE	MA	ORGANIZED RESEARCH UNITS	21421029	UNITED STATES	N	41306	41670	859	Other Research-Related	2013	90000	NIGMS	90000	Private	FALSE	FALSE	NIGMS	8840774	41788	PA-11-197	4R00GM104166-02	R00
NHLBI	9964890	6/12/20 0:00	PA-18-398	5K99HL144824-02	5	K99	HL	144824	2		COADY SEAN	7/1/19 0:00	6/30/21 0:00	NHLBI Mentored Transition to Independence Study Section[MTI(MA)]	11810543	5	PUBLIC HEALTH & PREV MEDICINE	555917996	KABJZBBJ4B54	555917996	KABJZBBJ4B54	US	44.975143	-93.227003	1450402	U_OF_MINNESOTA	MINNEAPOLIS	MN	SCHOOLS OF PUBLIC HEALTH	554552070	UNITED STATES	N	44013	44377	837	Other Research-Related	7/12/05 0:00	10/4/34 0:00	NHLBI	122269	Public	TRUE	FALSE	NHLBI	10413542	##########	PA-18-398	4R00HL144824-03	R00
NCI	8135521	8/31/11 0:00	PA-09-036	7K99CA151968-02	7	K99	CA	151968	2		SCHMIDT MICHAEL K	9/1/10 0:00	8/31/12 0:00	Institutional Training and Education Study Section (F)[NCI-F]	10201426	18	GENETICS	9214214	HJD6G4D6TJY5	9214214	HJD6G4D6TJY5	US	37.426852	-122.17047	8046501	STANFORD_U	STANFORD	CA	SCHOOLS OF MEDICINE	943052004	UNITED STATES	N	40787	41152	398	Other Research-Related	7/3/05 0:00	8/28/10 0:00	NCI	113466	Private	TRUE	TRUE	NCI	8526818	41172	PA-09-036	4R00CA151968-03	R00
NHLBI	8399047	10/30/12 0:00	PA-10-063	5K99HL108157-02	5	K99	HL	108157	2		CARLSON DREW E	1/1/12 0:00	4/30/14 0:00	ZHL1-CSR-P(O2)	8407335	3	SURGERY	42250712	GM1XX56LEP58	42250712	GM1XX56LEP58	US	39.953462	-75.193983	6463801	U_OF_PENNSYLVANIA	PHILADELPHIA	PA	SCHOOLS OF MEDICINE	191046205	UNITED STATES	N	41244	41759	837	Other Research-Related	7/5/05 0:00	4/26/19 0:00	NHLBI	80105	Private	FALSE	TRUE	NHLBI	8788319	41759	PA-10-063	4R00HL108157-03	R00
NIGMS	10105897	12/24/20	PAR-19-343	1K99GM140262-01	1	K99	GM	140262	1		GIBBS KENNETH D	1/1/21	12/31/22	ZGM1-TWD-Z(MK)	11132501	7	UnavaiLABle	30811269	QN6MS4VN7BD1	30811269	QN6MS4VN7BD1	US	42.336107	-71.107481	1080401	BRIGHAM_&_WOMENS_HOSP	BOSTON	MA	Independent Hospitals	21156110	UNITED STATES	N	1/1/21	12/31/21	859	Other Research-Related	7/13/05 0:00	10/14/73 0:00	NIGMS	100000	Private	FALSE	FALSE	NIGMS	10676409	9/2/22	PAR-19-343	4R00GM140262-03	R00
NINDS	9786825	7/24/19 0:00	PA-18-398	5K99NS109252-02	5	K99	NS	109252	2		CHEEVER THOMAS	9/30/18 0:00	8/31/20 0:00	NST-2 Study Section [NST-2]	14343949	7	NEUROLOGY	5436803	KG76WYENL5K1	5436803	KG76WYENL5K1	US	42.050479	-87.680046	6144650	NORTHWESTERN_U	CHICAGO	IL	SCHOOLS OF MEDICINE	606114579	UNITED STATES	N	43709	44074	853	Other Research-Related	7/11/05 0:00	12/23/44 0:00	NINDS	89478	Private	TRUE	TRUE	NINDS	10243459	44095	PA-18-398	4R00NS109252-03	R00
NIDCD	8617263	2/28/14 0:00	PA-11-197	5K99DC012575-02	5	K99	DC	12575	2		SHEKIM LANA O	3/1/13 0:00	11/10/14 0:00	Communication Disorders Review Committee[CDRC]	11055235	7	OTHER BASIC SCIENCES	188435911	Z9CRZKD42ZT1	188435911	Z9CRZKD42ZT1	US	39.292248	-76.625629	820104	U_OF_MARYLAND_BALTIMORE	BALTIMORE	MD	SCHOOLS OF DENTISTRY/ORAL HYGN	212011508	UNITED STATES	N	41699	41953	173	Other Research-Related	7/6/05 0:00	4/26/59 0:00	NIDCD	94715	public	FALSE	FALSE	NIDCD	8957482	41991	PA-11-197	4R00DC012575-03	R00
NIA	9354399	4/18/17 0:00	PA-15-083	5K99AG053438-02	5	K99	AG	53438	2		WILLIAMS JOHN	9/30/16 0:00	3/31/20 0:00	Biological Aging Study Section[NIA-B]	11760057	18	NEUROLOGY	9214214	HJD6G4D6TJY5	9214214	HJD6G4D6TJY5	US	37.426852	-122.17047	8046501	STANFORD_U	STANFORD	CA	SCHOOLS OF MEDICINE	943052004	UNITED STATES	N	42856	43921	866	Other Research-Related	7/9/05 0:00	1/26/76 0:00	NIA	100834	Private	FALSE	FALSE	NIA	10130176	43958	PA-15-083	4R00AG053438-03	R00
NINDS	8853349	4/23/15 0:00	PA-11-197	5K99NS087096-02	5	K99	NS	87096	2		MAMOUNAS LAURA	6/1/14 0:00	5/30/16 0:00	NST-2 Study Section [NST-2]	11124577	7	UnavaiLABle	76580745	DPMGH9MG1X67	76580745	DPMGH9MG1X67	US	42.337593	-71.108279	1464901	DANA-FARBER_CANCER_INST	BOSTON	MA	Independent Hospitals	22155450	UNITED STATES	N	42155	42520	853	Other Research-Related	7/7/05 0:00	2/25/05 0:00	NINDS	111456	Private	FALSE	FALSE	NINDS	9394901	42732	PA-11-197	4R00NS087096-03	R00
NIAID	8679551	6/30/14 0:00	PA-11-197	1K99AI110649-01	1	K99	AI	110649	1		PROGRAIS LAWRENCE J	7/1/14 0:00	6/30/15 0:00	Allergy Immunology and Transplantation Research Committee[AITC]	11197130	7	UnavaiLABle	30811269	QN6MS4VN7BD1	30811269	QN6MS4VN7BD1	US	42.336107	-71.107481	1080401	BRIGHAM_&_WOMENS_HOSP	BOSTON	MA	Independent Hospitals	21156110	UNITED STATES	N	41821	42185	855	Other Research-Related	7/6/05 0:00	12/16/04 0:00	NIAID	111385	Private	TRUE	TRUE	NIAID	9067630	42240	PA-11-197	4R00AI110649-02	R00
NHGRI	8767454	6/26/14 0:00	PA-11-197	1K99HG007982-01A1	1	K99	HG	7982	1	A	GILCHRIST DANIEL A	7/1/14 0:00	12/31/15 0:00	Genome Research Study Section[GNOM-G]	11689925	7	UnavaiLABle	76593722	Z1L9F1MM1RY3	76593722	Z1L9F1MM1RY3	US	42.337481	-71.104964	1504801	BOSTON_CHILDRENS_HOSP	BOSTON	MA	Independent Hospitals	21155724	UNITED STATES	N	41821	42369	172	Other Research-Related	7/6/05 0:00	4/4/25 0:00	NHGRI	118799	Private	FALSE	FALSE	NHGRI	9196588	42387	PA-11-197	4R00HG007982-02	R00
NICHD	8438466	2/27/13 0:00	PA-10-063	5K99HD068130-02	5	K99	HD	68130	2		EISENBERG ESTHER	3/5/12 0:00	2/28/14 0:00	Reproduction Andrology and Gynecology Study Section[CHHD-R]	10201000	7	PEDIATRICS	1910777	FTMTDMBR29C7	1910777	FTMTDMBR29C7	US	39.325256	-76.605131	4134401	JOHNS_HOPKINS_U	BALTIMORE	MD	SCHOOLS OF MEDICINE	212182680	UNITED STATES	N	41334	41698	865	Other Research-Related	7/5/05 0:00	8/17/87 0:00	NICHD	105055	Private	TRUE	TRUE	NICHD	8803856	41817	PA-10-063	4R00HD068130-03	R00
NIMH	10254229	8/19/21	PA-19-130	5K99MH122697-02	5	K99	MH	122697	2		VAN'T VEER ASHLEE V	9/4/20	8/31/22	ZMH1-ERB-M(01)	15774294	18	PSYCHIATRY	9214214	HJD6G4D6TJY5	9214214	HJD6G4D6TJY5	US	37.426852	-122.17047	8046501	STANFORD_U	STANFORD	CA	SCHOOLS OF MEDICINE	943052004	UNITED STATES	N	9/1/21	8/31/22	242	Other Research-Related	7/13/05 0:00	10/2/97 0:00	NIMH	108754	Private	FALSE	FALSE	NIMH	10661150	8/1/22	PA-19-130	4R00MH122697-03	R00
NINR	8743307	6/12/14 0:00	PA-11-197	5K99NR014587-02	5	K99	NR	14587	2		MATOCHA MARTHA F	9/27/13 0:00	6/30/15 0:00	Nursing Science Review Committee[NRRC(56)]	11439329	5	NONE	66469933	S352L5PJLMP8	66469933	S352L5PJLMP8	US	33.791247	-84.3249	2384501	EMORY_U	ATLANTA	GA	SCHOOLS OF NURSING	303221007	UNITED STATES	N	41821	42185	361	Other Research-Related	7/6/05 0:00	5/29/46 0:00	NINR	90000	Private	TRUE	TRUE	NINR	9093965	42261	PA-11-197	4R00NR014587-03	R00
NCI	8036443	3/25/10 0:00	PA-07-297	7K99CA131560-02	7	K99	CA	131560	2		SCHMIDT MICHAEL K	7/1/09 0:00	6/30/10 0:00	Institutional Training and Education Study Section (F)[NCI-F]	8908919	3	GENETICS	43207562	FL6GV84CKN57	43207562	FL6GV84CKN57	US	41.310925	-72.926428	9420201	YALE_U	NEW HAVEN	CT	SCHOOLS OF MEDICINE	65208327	UNITED STATES	N	40262	40359	398	Other Research-Related	7/1/05 0:00	3/26/97 0:00	NCI	72040	Private	TRUE	TRUE	NCI	8122501	40408		4R00CA131560-03	R00
NIBIB	10124470	6/3/20 0:00	PA-18-591	3K99EB026312-02S1	3	K99	EB	26312	2	S	LIU GUOYING	3/10/20 0:00	9/29/20 0:00		14340980	7	UnavaiLABle	155342439	DKMDCB5HNBL7	155342439	DKMDCB5HNBL7	US	39.298699	-76.593679	2370003	HUGO_W_MOSER_RES_INST_KENNEDY_KRIEGER	BALTIMORE	MD	Research Institutes	212051832	UNITED STATES	N	43985	44103	286	Other Research-Related	7/12/05 0:00	3/7/47 0:00	NIBIB	53758	Private	FALSE	FALSE	NIBIB	10247299	44097	PA-16-193	4R00EB026312-03	R00
NINDS	8337309	41089	PA-10-063	5K99NS076646-02	5	K99	NS	76646	2		OWENS DAVID F	40812	41517	NST-2 Study Section [NST-2]	10381129	52	BIOLOGY	804355790	UYTTZT6G9DT1	804355790	UYTTZT6G9DT1	US	32.876991	-117.24087	577507	U_OF_CALIFORNIA_SAN_DIEGO	LA JOLLA	CA	SCHOOLS OF ARTS AND SCIENCES	920930621	UNITED STATES	N	41153	41517	853	Other Research-Related	2012	85580	NINDS	85580	public	FALSE	FALSE	NINDS	8802904	41732	PA-10-063	4R00NS076646-03	R00
NIAAA	8541682	7/24/13 0:00	PA-10-063	5K99AA020782-02	5	K99	AA	20782	2		FREEMAN ROBERT	9/10/12 0:00	8/31/14 0:00	ZAA1-DD(01)M	10462511	7	PUBLIC HEALTH & PREV MEDICINE	1910777	FTMTDMBR29C7	1910777	FTMTDMBR29C7	US	39.325256	-76.605131	4134401	JOHNS_HOPKINS_U	BALTIMORE	MD	SCHOOLS OF PUBLIC HEALTH	212182680	UNITED STATES	N	41518	41882	273	Other Research-Related	7/5/05 0:00	4/23/86 0:00	NIAAA	141098	Private	TRUE	TRUE	NIAAA	8894846	41851	PA-10-063	4R00AA020782-03	R00
NINDS	8826198	5/12/15 0:00	PA-11-197	5K99NS086916-02	5	K99	NS	86916	2		SILBERBERG SHAI D	4/1/14 0:00	5/31/15 0:00	NST-2 Study Section [NST-2]	11387474	12	PHYSIOLOGY	94878337	KMH5K9V7S518	94878337	KMH5K9V7S518	US	37.767442	-122.413937	577508	U_OF_CALIFORNIA_SAN_FRANCISCO	SAN FRANCISCO	CA	SCHOOLS OF MEDICINE	941432510	UNITED STATES	N	42095	42155	853	Other Research-Related	7/7/05 0:00	8/4/73 0:00	NINDS	26880	public	FALSE	FALSE	NINDS	9053814	42202	PA-11-197	4R00NS086916-03	R00
NIA	8665361	5/20/14 0:00	PA-11-197	5K99AG042026-02	5	K99	AG	42026	2		WISE BRADLEY C	6/1/13 0:00	5/31/15 0:00	Basic Neuroscience of Aging Study Section[NIA-N]	10310637	8	UnavaiLABle	73130411	FLJ7DQKLL226	73130411	FLJ7DQKLL226	US	42.363198	-71.068772	4907701	MASSACHUSETTS_GENERAL_HOSP	BOSTON	MA	Independent Hospitals	21142621	UNITED STATES	N	41791	42155	866	Other Research-Related	7/6/05 0:00	7/12/75 0:00	NIA	137160	Private	TRUE	TRUE	NIA	9113696	42272	PA-11-197	4R00AG042026-03	R00
NHLBI	8399063	10/30/12 0:00	PA-10-063	5K99HL111345-02	5	K99	HL	111345	2		CARLSON DREW E	1/1/12 0:00	12/31/12 0:00	ZHL1-CSR-P(O2)	10571104	18	NEUROLOGY	9214214	HJD6G4D6TJY5	9214214	HJD6G4D6TJY5	US	37.426852	-122.17047	8046501	STANFORD_U	STANFORD	CA	SCHOOLS OF MEDICINE	943052004	UNITED STATES	N	41244	41274	837	Other Research-Related	7/5/05 0:00	4/3/36 0:00	NHLBI	86292	Private	FALSE	FALSE	NHLBI	8598272	41330	PA-10-063	4R00HL111345-03	R00
NCI	9120832	7/11/16 0:00	PA-14-042	5K99CA184239-02	5	K99	CA	184239	2		RADAEV SERGEY	8/5/15 0:00	1/31/17 0:00	Transition to Independence Study Section (I)[NCI-I]	11814604	12	UnavaiLABle	64931884	KUKXRCZ6NZC2	64931884	KUKXRCZ6NZC2	US	40.764045	-73.956024	5079202	SLOAN-KETTERING_INST_CAN_RES	NEW YORK	NY	Research Institutes	100656007	UNITED STATES	N	42583	42766	398	Other Research-Related	7/8/05 0:00	11/17/85 0:00	NCI	104417	Private	FALSE	FALSE	NCI	9381095	42746	PA-14-042	4R00CA184239-03	R00
NIAAA	8728705	8/1/14 0:00	PA-11-197	5K99AA021803-02	5	K99	AA	21803	2		JUNG KATHY	9/1/13 0:00	11/30/15 0:00	Biomedical Research Study Section[AA-1]	8868638	5	INTERNAL MEDICINE/MEDICINE	66469933	S352L5PJLMP8	66469933	S352L5PJLMP8	US	33.791247	-84.3249	2384501	EMORY_U	ATLANTA	GA	SCHOOLS OF MEDICINE	303221007	UNITED STATES	N	41883	42338	273	Other Research-Related	7/6/05 0:00	3/15/11 0:00	NIAAA	113665	Private	TRUE	TRUE	NIAAA	9173178	42335	PA-11-197	4R00AA021803-03	R00
NIBIB	7612656	5/4/09 0:00	PA-07-297	5K99EB008129-02	5	K99	EB	8129	2		ERIM ZEYNEP	5/1/08 0:00	4/30/10 0:00	ZEB1-OSR-B(O1)S	8880152	8	UnavaiLABle	73130411	FLJ7DQKLL226	73130411	FLJ7DQKLL226	US	42.363198	-71.068772	4907701	MASSACHUSETTS_GENERAL_HOSP	BOSTON	MA	Independent Hospitals	21142621	UNITED STATES	N	39934	40298	286	Other Research-Related	7/1/05 0:00	5/29/46 0:00	NIBIB	90000	Private	TRUE	TRUE	NIBIB	8059859	40359	PA-09-036	4R00EB008129-03	R00
NIDCR	10004026	7/20/20 0:00	PA-19-130	5K99DE029229-02	5	K99	DE	29229	2		FRIEDEN LESLIE A	9/1/19 0:00	9/1/21 0:00	NIDCR Special Grants Review Committee[DSR]	15493571	7	UnavaiLABle	78200995	HMSNCM57QNR5	78200995	HMSNCM57QNR5	US	47.627342	-122.331593	861001	FRED_HUTCHINSON_CANCER_RES_CTR	SEATTLE	WA	Research Institutes	981094433	UNITED STATES	N	44075	44440	121	Other Research-Related	7/12/05 0:00	9/20/44 0:00	NIDCR	162432	Private	FALSE	FALSE	NIDCR	10475404	44440	PA-19-130	4R00DE029229-03	R00
NIMH	7849730	5/4/10 0:00	PA-07-297	5K99MH085004-02	5	K99	MH	85004	2		DESMOND NANCY L	6/1/09 0:00	5/31/11 0:00	ZMH1-ERB-H(09)	7372865	7	UnavaiLABle	30811269	QN6MS4VN7BD1	30811269	QN6MS4VN7BD1	US	42.336107	-71.107481	1080401	BRIGHAM_&_WOMENS_HOSP	BOSTON	MA	Independent Hospitals	21156110	UNITED STATES	N	40330	40694	242	Other Research-Related	7/2/05 0:00	9/3/44 0:00	NIMH	89367	Private	TRUE	TRUE	NIMH	8299802	40759	PA-10-063	4R00MH085004-03	R00
NIDA	7499003	8/26/08 0:00	PA-06-133	5K99DA023609-02	5	K99	DA	23609	2		LIN YU	9/30/07 0:00	6/30/10 0:00	ZDA1-GXM-A(19)	8172185	18	ANESTHESIOLOGY	9214214	HJD6G4D6TJY5	9214214	HJD6G4D6TJY5	US	37.426852	-122.17047	8046501	STANFORD_U	STANFORD	CA	SCHOOLS OF MEDICINE	943052004	UNITED STATES	N	39692	40359	279	Other Research-Related	6/30/05 0:00	6/22/38 0:00	NIDA	87102	Private	TRUE	TRUE	NIDA	8015480	40317	PA-07-297	4R00DA023609-03	R00
NCI	7920538	9/15/09 0:00	PA-07-297	3K99CA129565-02S1	3	K99	CA	129565	2	S	SCHMIDT MICHAEL K	9/1/09 0:00	8/31/10 0:00	Institutional Training and Education Study Section (F)[NCI-F]	8768213	7	INTERNAL MEDICINE/MEDICINE	5436803	KG76WYENL5K1	5436803	KG76WYENL5K1	US	42.050479	-87.680046	6144650	NORTHWESTERN_U	CHICAGO	IL	SCHOOLS OF MEDICINE	606114579	UNITED STATES	N	40057	40421	701	Other Research-Related	7/1/05 0:00	7/19/45 0:00	NCI	53162	Private	TRUE	TRUE	NCI	8121262	40428		4R00CA129565-03	R00
NIGMS	8135525	8/31/11 0:00	PA-09-036	5K99GM094210-02	5	K99	GM	94210	2		BENDER MICHAEL T	9/1/10 0:00	8/31/12 0:00	ZGM1-BRT-9(KR)	10195666	7	BIOCHEMISTRY	1910777	FTMTDMBR29C7	1910777	FTMTDMBR29C7	US	39.325256	-76.605131	4134401	JOHNS_HOPKINS_U	BALTIMORE	MD	SCHOOLS OF MEDICINE	212182680	UNITED STATES	N	40787	41152	859	Other Research-Related	7/3/05 0:00	9/13/10 0:00	NIGMS	76958	Private	FALSE	FALSE	NIGMS	8533487	41152	PA-11-197	4R00GM094210-03	R00
NHLBI	9096884	6/22/16 0:00	PA-14-042	5K99HL127180-02	5	K99	HL	127180	2		WANG WAYNE C	7/1/15 0:00	6/30/18 0:00	NHLBI Mentored Transition to Independence Study Section[MTI(JA)]	11067546	18	INTERNAL MEDICINE/MEDICINE	9214214	HJD6G4D6TJY5	9214214	HJD6G4D6TJY5	US	37.426852	-122.17047	8046501	STANFORD_U	STANFORD	CA	SCHOOLS OF MEDICINE	943052004	UNITED STATES	N	42552	43281	837	Other Research-Related	7/8/05 0:00	6/20/41 0:00	NHLBI	161244	Private	FALSE	FALSE	NHLBI	9825914	43478	PA-14-042	4R00HL127180-03	R00
NIGMS	7404448	3/31/08 0:00	PA-06-133	5K99GM080400-02	5	K99	GM	80400	2		CARTER ANTHONY D	4/15/07 0:00	6/30/08 0:00	ZGM1-BRT-9(KR)	7694767	2	CHEMISTRY	7431505	SPVKK1RC2MZ3	7431505	SPVKK1RC2MZ3	US	40.013296	-105.251932	1199902	U_OF_COLORADO	Boulder	CO	SCHOOLS OF ARTS AND SCIENCES	803031058	UNITED STATES	N	39539	39629	859	Other Research-Related	6/30/05 0:00	3/23/59 0:00	NIGMS	21632	Public	FALSE	FALSE	NIGMS	7616611	39625		4R00GM080400-03	R00
NIDCD	8589410	11/22/13 0:00	PA-11-197	5K99DC012803-02	5	K99	DC	12803	2		SULLIVAN SUSAN L	12/1/12 0:00	11/30/14 0:00	Communication Disorders Review Committee[CDRC]	9781938	7	NEUROLOGY	5436803	KG76WYENL5K1	5436803	KG76WYENL5K1	US	42.050479	-87.680046	6144650	NORTHWESTERN_U	CHICAGO	IL	SCHOOLS OF MEDICINE	606114579	UNITED STATES	N	41609	41973	173	Other Research-Related	7/6/05 0:00	3/21/61 0:00	NIDCD	95410	Private	TRUE	TRUE	NIDCD	8985440	42107	PA-11-197	4R00DC012803-03	R00
NIA	8334060	7/5/12 0:00	PA-10-063	5K99AG039482-02	5	K99	AG	39482	2		REFOLO LORENZO	9/30/11 0:00	7/31/13 0:00	Basic Neuroscience of Aging Study Section[NIA-N]	10322334	8	UnavaiLABle	73130411	FLJ7DQKLL226	73130411	FLJ7DQKLL226	US	42.363198	-71.068772	4907701	MASSACHUSETTS_GENERAL_HOSP	BOSTON	MA	Independent Hospitals	21142621	UNITED STATES	N	41122	41486	866	Other Research-Related	7/4/05 0:00	11/19/46 0:00	NIA	126698	Private	TRUE	TRUE	NIA	8754100	41607	PA-10-063	4R00AG039482-03	R00
NIGMS	8231394	2/10/12 0:00	PA-10-063	5K99GM095713-02	5	K99	GM	95713	2		HAMLET MICHELLE R	2/21/11 0:00	10/31/12 0:00	ZGM1-BRT-9(KR)	10329368	12	INTERNAL MEDICINE/MEDICINE	71037113	LHGDNJMZ64Y1	71037113	LHGDNJMZ64Y1	US	40.763746	-73.955386	7056601	ROCKEFELLER_U	NEW YORK	NY	GRADUATE SCHOOLS	100656399	UNITED STATES	N	40940	41213	859	Other Research-Related	7/4/05 0:00	5/29/46 0:00	NIGMS	90000	Private	FALSE	FALSE	NIGMS	8582163	41267		4R00GM095713-03	R00
NHLBI	9343039	8/17/17 0:00	PA-15-083	5K99HL130574-02	5	K99	HL	130574	2		WANG WAYNE C	9/1/16 0:00	6/30/18 0:00	NHLBI Mentored Transition to Independence Study Section[MTI(OA)]	11388495	13	INTERNAL MEDICINE/MEDICINE	621889815	QHF5ZZ114M72	621889815	QHF5ZZ114M72	US	40.8415	-73.9414	1833205	COLUMBIA_U_HEALTH_SCI	NEW YORK	NY	SCHOOLS OF MEDICINE	100323725	UNITED STATES	N	42917	43281	837	Other Research-Related	7/9/05 0:00	1/26/55 0:00	NHLBI	166212	Private	TRUE	TRUE	NHLBI	9722436	43328	PA-15-083	4R00HL130574-03	R00
NIDA	7496083	9/8/08 0:00	PA-06-133	5K99DA022891-02	5	K99	DA	22891	2		CAULDER MARK	9/15/07 0:00	8/31/09 0:00	ZDA1-GXM-A(05)	8614937	3	PSYCHIATRY	43207562	FL6GV84CKN57	43207562	FL6GV84CKN57	US	41.310925	-72.926428	9420201	YALE_U	NEW HAVEN	CT	SCHOOLS OF MEDICINE	65208327	UNITED STATES	N	39692	40056	277	Other Research-Related	6/30/05 0:00	5/30/42 0:00	NIDA	88540	Private	TRUE	TRUE	NIDA	7925219	40073	PA-06-133	3R00DA022891-03S1	R00
NHLBI	10404259	5/25/21	PA-18-398	4K99HL147212-03	4	K99	HL	147212	3		DIXIT SHILPY	6/1/19	8/31/21	NHLBI Mentored Transition to Independence Study Section[MTI(JA)]	12219097	3	NEUROSCIENCES	42250712	GM1XX56LEP58	42250712	GM1XX56LEP58	US	39.953462	-75.193983	6463801	U_OF_PENNSYLVANIA	PHILADELPHIA	PA	SCHOOLS OF MEDICINE	191046205	UNITED STATES	N	6/1/21	8/31/21	233	Other Research-Related	7/13/05 0:00	11/12/47 0:00	NHLBI	17483	Private	FALSE	FALSE	NHLBI	10445428	44417	PA-18-398	4R00HL147212-04	R00
NCI	10145623	5/14/21	PA-19-130	5K99CA248715-02	5	K99	CA	248715	2		LUO RUIBAI	5/1/20	1/31/22	Transition to Independence Study Section (I)[NCI-I]	14123669	49	UnavaiLABle	781613492	PHZJFZ32NKH4	781613492	PHZJFZ32NKH4	US	32.903062	-117.243592	7375802	SCRIPPS_RES_INST_THE	LA JOLLA	CA	Other Domestic Non-Profits	920371000	UNITED STATES	N	5/1/21	1/31/22	398	Other Research-Related	7/13/05 0:00	7/21/38 0:00	NCI	123655	Private	FALSE	FALSE	NCI	10547983	2/18/22	PA-19-130	4R00CA248715-03	R00
NCI	9274241	4/28/17 0:00	PA-15-083	5K99CA201603-02	5	K99	CA	201603	2		RADAEV SERGEY	5/16/16 0:00	4/30/18 0:00	Transition to Independence Study Section (I)[NCI-I]	12559030	7	UnavaiLABle	30811269	QN6MS4VN7BD1	30811269	QN6MS4VN7BD1	US	42.336107	-71.107481	1080401	BRIGHAM_&_WOMENS_HOSP	BOSTON	MA	Independent Hospitals	21156110	UNITED STATES	N	42856	43220	398	Other Research-Related	7/9/05 0:00	11/22/87 0:00	NCI	178200	Private	TRUE	TRUE	NCI	9844215	43517	PA-15-083	4R00CA201603-03	R00
NCI	7619638	39944	PA-07-297	5K99CA133245-02	5	K99	CA	133245	2		SCHMIDT MICHAEL K	39600	40329	Institutional Training and Education Study Section (F)[NCI-F]	9094105	7	UnavaiLABle	71723621	C1CPANL3EWK4	71723621	C1CPANL3EWK4	US	42.33982	-71.10568	758101	BETH_ISRAEL_DEACONESS_MED_CTR	BOSTON	MA	Independent Hospitals	22155400	UNITED STATES	N	39965	40329	398	Other Research-Related	2009	132030	NCI	132030	Private	FALSE	FALSE	NCI	8068459	40360		4R00CA133245-03	R00
NIBIB	10017968	44060	PA-18-398	5K99EB027177-02	5	K99	EB	27177	2		DUAN QI	43723	44561	ZEB1-OSR-E(M2)S	14957844	7	UnavaiLABle	30811269	QN6MS4VN7BD1	30811269	QN6MS4VN7BD1	US	42.336107	-71.107481	1080401	BRIGHAM_&_WOMENS_HOSP	BOSTON	MA	Independent Hospitals	21156110	UNITED STATES	N	44075	44561	286	Other Research-Related	2020	93240	NIBIB	93240	Private	TRUE	TRUE	NIBIB	10611559	5/20/22	PA-20-188	4R00EB027177-03	R00
NINDS	7367933	3/10/08 0:00	PA-06-133	5K99NS058391-02	5	K99	NS	58391	2		MAMOUNAS LAURA	4/1/07 0:00	3/31/09 0:00	ZNS1-SRB-M(41)	8655671	7	UnavaiLABle	76593722	Z1L9F1MM1RY3	76593722	Z1L9F1MM1RY3	US	42.337481	-71.104964	1504801	BOSTON_CHILDRENS_HOSP	BOSTON	MA	Independent Hospitals	21155724	UNITED STATES	N	39539	39903	853	Other Research-Related	6/30/05 0:00	4/3/44 0:00	NINDS	89214	Private	FALSE	FALSE	NINDS	7784292	39899		4R00NS058391-03	R00
NICHD	8106325	7/18/11 0:00	PA-09-036	5K99HD061485-02	5	K99	HD	61485	2		FREUND LISA S	7/7/10 0:00	6/30/12 0:00	ZHD1-MRG-C(ZL)	9529540	8	UnavaiLABle	73130411	FLJ7DQKLL226	73130411	FLJ7DQKLL226	US	42.363198	-71.068772	4907701	MASSACHUSETTS_GENERAL_HOSP	BOSTON	MA	Independent Hospitals	21142621	UNITED STATES	N	40725	41090	865	Other Research-Related	7/3/05 0:00	12/16/64 0:00	NICHD	133300	Private	TRUE	TRUE	NICHD	8495516	41124	PA-09-036	4R00HD061485-03	R00
NLM	8450756	5/1/13 0:00	PA-11-197	5K99LM011128-02	5	K99	LM	11128	2		SIM HUA-CHUAN	4/1/12 0:00	3/31/15 0:00	ZLM1-ZH-C(01)	9450656	4	INTERNAL MEDICINE/MEDICINE	44387793	TP7EK8DZV6N5	44387793	TP7EK8DZV6N5	US	36.007766	-78.926475	2221101	DUKE_U	DURHAM	NC	SCHOOLS OF MEDICINE	277054673	UNITED STATES	N	41365	42094	879	Other Research-Related	7/5/05 0:00	5/25/31 0:00	NLM	84517	Private	FALSE	TRUE	NLM	9012888	42093	PA-11-197	4R00LM011128-03	R00
NICHD	10214658	7/2/21	PA-19-130	5K99HD102567-02	5	K99	HD	102567	2		ESPOSITO LAYLA E	7/10/20	6/30/22	Health Behavior and Context Study Section[CHHD-M]	15357668	7	PEDIATRICS	605799469	HD1WMN6945W6	605799469	HD1WMN6945W6	US	47.660307	-122.315168	9087701	U_OF_WASHINGTON	SEATTLE	WA	SCHOOLS OF MEDICINE	981959472	UNITED STATES	N	7/1/21	6/30/22	865	Other Research-Related	7/13/05 0:00	5/16/43 0:00	NICHD	125415	Public	FALSE	TRUE	NICHD	10652009	7/6/22	PA-19-130	4R00HD102567-03	R00
NIMH	9047314	3/24/16 0:00	PA-14-042	5K99MH106649-02	5	K99	MH	106649	2		DESMOND NANCY L	4/10/15 0:00	3/31/17 0:00	ZMH1-ERB-S(01)	11097443	18	BIOMEDICAL ENGINEERING	9214214	HJD6G4D6TJY5	9214214	HJD6G4D6TJY5	US	37.426852	-122.17047	8046501	STANFORD_U	STANFORD	CA	SCHOOLS OF MEDICINE	943052004	UNITED STATES	N	42461	42825	242	Other Research-Related	7/8/05 0:00	4/13/11 0:00	NIMH	113694	Private	FALSE	FALSE	NIMH	9415481	42887	PA-14-042	4R00MH106649-03	R00
NIEHS	8007444	1/12/11 0:00	PA-09-036	5K99ES017780-02	5	K99	ES	17780	2		SHREFFLER CAROL A	1/1/10 0:00	12/31/11 0:00	ZES1-LKB-J(K6)	9749129	12	OBSTETRICS & GYNECOLOGY	94878337	KMH5K9V7S518	94878337	KMH5K9V7S518	US	37.767442	-122.413937	577508	U_OF_CALIFORNIA_SAN_FRANCISCO	SAN FRANCISCO	CA	SCHOOLS OF MEDICINE	941432510	UNITED STATES	N	40555	40908	113	Other Research-Related	7/3/05 0:00	5/29/46 0:00	NIEHS	90000	public	TRUE	TRUE	NIEHS	8413071	40984		4R00ES017780-03	R00
NICHD	9741143	7/31/19 0:00	PA-16-193	5K99HD093798-02	5	K99	HD	93798	2		DAVIS MAURICE	9/1/18 0:00	8/31/20 0:00	Health Behavior and Context Study Section[CHHD-M]	14656126	12	OBSTETRICS & GYNECOLOGY	94878337	KMH5K9V7S518	94878337	KMH5K9V7S518	US	37.767442	-122.413937	577508	U_OF_CALIFORNIA_SAN_FRANCISCO	SAN FRANCISCO	CA	SCHOOLS OF MEDICINE	941432510	UNITED STATES	N	43709	44074	865	Other Research-Related	7/11/05 0:00	6/7/60 0:00	NICHD	131647	public	FALSE	TRUE	NICHD	10203087	44044	PA-16-193	4R00HD093798-03	R00
NHLBI	9987755	8/7/20 0:00	PA-18-398	5K99HL148542-02	5	K99	HL	148542	2		LIDMAN KARIN FREDRIKSSON	8/1/19 0:00	7/31/21 0:00	NHLBI Mentored Transition to Independence Study Section[MTI(MA)]	14456975	2	ENGINEERING (ALL TYPES)	7431505	SPVKK1RC2MZ3	7431505	SPVKK1RC2MZ3	US	40.013296	-105.251932	1199902	U_OF_COLORADO	Boulder	CO	BIOMED ENGR/COL ENGR/ENGR STA	803031058	UNITED STATES	N	44044	44408	837	Other Research-Related	7/12/05 0:00	12/22/49 0:00	NHLBI	127827	Public	TRUE	FALSE	NHLBI	10445411	44442	PA-18-398	4R00HL148542-03	R00
NIMH	7575282	2/24/09 0:00	PA-07-297	5K99MH082109-02	5	K99	MH	82109	2		DESMOND NANCY L	3/1/08 0:00	8/31/11 0:00	ZMH1-ERB-H(09)	8832246	2	BIOLOGY	9095365	LL8GLEVH6MG3	9095365	LL8GLEVH6MG3	US	40.764542	-111.850317	514002	U_OF_UTAH	SALT LAKE CITY	UT	SCHOOLS OF ARTS AND SCIENCES	841128906	UNITED STATES	N	39873	40786	242	Other Research-Related	7/1/05 0:00	5/11/05 0:00	NIMH	75007	public	FALSE	FALSE	NIMH	8309570	40777		4R00MH082109-03	R00
NIDDK	8735946	9/12/14 0:00	PA-11-197	5K99DK099434-02	5	K99	DK	99434	2		RANKIN TRACY L	9/17/13 0:00	7/31/15 0:00	Kidney Urologic and Hematologic Diseases D Study Section[DDK-D]	11591538	7	UnavaiLABle	76593722	Z1L9F1MM1RY3	76593722	Z1L9F1MM1RY3	US	42.337481	-71.104964	1504801	BOSTON_CHILDRENS_HOSP	BOSTON	MA	Independent Hospitals	21155724	UNITED STATES	N	41899	42216	847	Other Research-Related	7/6/05 0:00	5/29/46 0:00	NIDDK	90000	Private	FALSE	FALSE	NIDDK	9051452	42213	PA-11-197	4R00DK099434-03	R00
NHLBI	8471770	5/30/13 0:00	PA-10-063	5K99HL111410-02	5	K99	HL	111410	2		CARLSON DREW E	6/1/12 0:00	7/31/14 0:00	ZHL1-CSR-P(O2)	10663512	7	UnavaiLABle	71723621	C1CPANL3EWK4	71723621	C1CPANL3EWK4	US	42.33982	-71.10568	758101	BETH_ISRAEL_DEACONESS_MED_CTR	BOSTON	MA	Independent Hospitals	22155400	UNITED STATES	N	41426	41851	837	Other Research-Related	7/5/05 0:00	5/16/79 0:00	NHLBI	102040	Private	FALSE	FALSE	NHLBI	8848174	42237	PA-10-063	4R00HL111410-03	R00
NIEHS	8165274	40780	PA-10-063	1K99ES020353-01	1	K99	ES	20353	1		SHREFFLER CAROL A	40787	41243	ZES1-LKB-J(K9)	10658400	7	GENETICS	47006379	JDLVAVGYJQ21	47006379	JDLVAVGYJQ21	US	42.335672	-71.104237	3212902	HARVARD_MED_SCH	BOSTON	MA	SCHOOLS OF MEDICINE	21201616	UNITED STATES	N	40787	41243	113	Other Research-Related	2011	89910	NIEHS	89910	Private	FALSE	FALSE	NIEHS	8533199	41239		4R00ES020353-02	R00
NCI	8544427	41494	PA-10-063	5K99CA157954-02	5	K99	CA	157954	2		SCHMIDT MICHAEL K	41164	41882	Institutional Training and Education Study Section (F)[NCI-F]	8921940	18	UnavaiLABle	148230662	MGUCX773RNJ8	148230662	MGUCX773RNJ8	US	26.885174	-80.11392	10005569	SCRIPPS_FLORIDA	JUPITER	FL	Research Institutes	334585284	UNITED STATES	N	41518	41882	398	Other Research-Related	2013	147150	NCI	147150	Private	FALSE	FALSE	NCI	8928274	41904	PA-10-063	4R00CA157954-03	R00
NEI	10040342	8/31/20 0:00	PA-19-130	1K99EY031782-01	1	K99	EY	31782	1		AGARWAL NEERAJ	9/30/20 0:00	8/31/21 0:00	ZEY1-VSN(03)	16164176	27	NONE	9584210	U2JMKHNS5TG4	9584210	U2JMKHNS5TG4	US	34.134332	-118.12652	1073501	CALIFORNIA_INST_OF_TECH	PASADENA	CA	SCHOOLS OF ARTS AND SCIENCES	911250001	UNITED STATES	N	44104	44439	867	Other Research-Related	7/12/05 0:00	11/21/24 0:00	NEI	118665	Private	FALSE	FALSE	NEI	10529847	1/31/22	PA-19-130	4R00EY031782-03	R00
NEI	8091078	8/4/11 0:00	PA-10-063	1K99EY021503-01	1	K99	EY	21503	1		STEINMETZ MICHAEL A	9/1/11 0:00	8/31/12 0:00	ZEY1-VSN(10)	7983374	3	NEUROSCIENCES	42250712	GM1XX56LEP58	42250712	GM1XX56LEP58	US	39.953462	-75.193983	6463801	U_OF_PENNSYLVANIA	PHILADELPHIA	PA	SCHOOLS OF MEDICINE	191046205	UNITED STATES	N	40787	41152	867	Other Research-Related	7/3/05 0:00	5/21/03 0:00	NEI	74286	Private	FALSE	FALSE	NEI	8513442	41127	PA-11-197	4R00EY021503-02	R00
NHLBI	8050580	3/2/11 0:00	PA-09-036	5K99HL098458-02	5	K99	HL	98458	2		COOPER LAWTON S	4/1/10 0:00	8/14/11 0:00	ZHL1-CSR-Z(O2)	9155014	4	PUBLIC HEALTH & PREV MEDICINE	608195277	D3LHU66KBLD5	608195277	D3LHU66KBLD5	US	35.9316	-79.057377	578206	U_OF_NORTH_CAROLINA_CHAPEL_HILL	CHAPEL HILL	NC	SCHOOLS OF PUBLIC HEALTH	275995023	UNITED STATES	N	40634	40769	837	Other Research-Related	7/3/05 0:00	3/9/20 0:00	NHLBI	116947	Public	TRUE	TRUE	NHLBI	8289712	40767		4R00HL098458-03	R00
NHLBI	9066209	6/7/16 0:00	PA-14-042	5K99HL124322-02	5	K99	HL	124322	2		CARLSON DREW E	5/12/15 0:00	7/31/16 0:00	NHLBI Mentored Transition to Independence Study Section[MTI(JA)]	10840913	7	ENGINEERING (ALL TYPES)	49435266	THL6A6JLE1S7	49435266	THL6A6JLE1S7	US	42.349594	-71.099726	10001093	BOSTON_U_(CHARLES_RIVER_CAMPUS)	BOSTON	MA	BIOMED ENGR/COL ENGR/ENGR STA	22151390	UNITED STATES	N	42491	42582	837	Other Research-Related	7/8/05 0:00	11/24/56 0:00	NHLBI	130356	Private	FALSE	FALSE	NHLBI	9376985	42727	PA-14-042	4R00HL124322-03	R00
NICHD	9529686	6/24/18 0:00	PA-16-193	5K99HD092542-02	5	K99	HD	92542	2		PRICE AMANDA JOY	7/20/17 0:00	6/30/21 0:00	Biobehavioral and Behavioral Sciences Study Section[CHHD-H]	12470161	5	MICROBIOLOGY/IMMUN/VIROLOGY	82359691	LN53LCFJFL45	82359691	LN53LCFJFL45	US	42.369697	-71.11193	3212901	HARVARD_U	CAMBRIDGE	MA	SCHOOLS OF ARTS AND SCIENCES	21385369	UNITED STATES	N	43282	44377	865	Other Research-Related	7/10/05 0:00	7/31/49 0:00	NICHD	127683	Private	FALSE	FALSE	NICHD	10542985	2/10/22	PA-16-193	4R00HD092542-03	R00
NIDA	8600669	12/10/13 0:00	PA-11-197	5K99DA034648-02	5	K99	DA	34648	2		SORENSEN ROGER	1/1/13 0:00	6/30/16 0:00	Career Development Education and Training Study Section[NIDA-K]	9176382	7	BIOLOGY	47006379	JDLVAVGYJQ21	47006379	JDLVAVGYJQ21	US	42.335672	-71.104237	3212902	HARVARD_MED_SCH	BOSTON	MA	SCHOOLS OF MEDICINE	21201616	UNITED STATES	N	41640	42551	279	Other Research-Related	7/6/05 0:00	8/31/32 0:00	NIDA	121505	Private	TRUE	FALSE	NIDA	9378801	42808	PA-11-197	4R00DA034648-03	R00
NHLBI	8785700	11/24/14 0:00	PA-11-197	5K99HL118154-02	5	K99	HL	118154	2		GALIS ZORINA S	12/12/13 0:00	2/24/15 0:00	ZHL1-CSR-P(O1)	8624529	1	UnavaiLABle	6471700	Y2K4F9RPRRG7	6471700	Y2K4F9RPRRG7	US	44.02432	-92.46011	4976101	MAYO_CLINIC_ROCHESTER	ROCHESTER	MN	Other Domestic Non-Profits	559050001	UNITED STATES	N	41974	42059	837	Other Research-Related	7/7/05 0:00	5/29/46 0:00	NHLBI	90000	Private	FALSE	FALSE	NHLBI	9022589	42209	PA-11-197	4R00HL118154-03	R00
NLM	8190163	7/1/11 0:00	PA-10-063	1K99LM010943-01A1	1	K99	LM	10943	1	A	SIM HUA-CHUAN	7/1/11 0:00	6/30/12 0:00	Biomedical Informatics Library and Data Sciences Review Committee[BLR]	9582918	18	MISCELLANEOUS	4514360	MKAGLD59JRL1	4514360	MKAGLD59JRL1	US	40.440909	-79.959125	2059802	U_OF_PITTSBURGH_AT_PITTSBURGH	PITTSBURGH	PA	SCHOOLS OF MEDICINE	152133320	UNITED STATES	N	40725	41090	879	Other Research-Related	7/3/05 0:00	11/12/45 0:00	NLM	89802	Public	TRUE	TRUE	NLM	8471822	41066		4R00LM010943-02	R00
NIA	8074413	6/28/11 0:00	PA-09-036	5K99AG034214-02	5	K99	AG	34214	2		MILLER MARILYN	6/1/10 0:00	11/30/12 0:00	Basic Neuroscience of Aging Study Section[NIA-N]	9320106	7	INTERNAL MEDICINE/MEDICINE	605799469	HD1WMN6945W6	605799469	HD1WMN6945W6	US	47.660307	-122.315168	9087701	U_OF_WASHINGTON	SEATTLE	WA	SCHOOLS OF MEDICINE	981959472	UNITED STATES	N	40725	41243	866	Other Research-Related	7/3/05 0:00	1/11/48 0:00	NIA	127116	Public	TRUE	TRUE	NIA	8442059	41130	PA-11-197	4R00AG034214-03	R00
NHLBI	8043833	40511	PA-10-063	1K99HL102223-01A1	1	K99	HL	102223	1	A	CARLSON DREW E	40513	41243	ZHL1-CSR-Z(O1)	9886302	33	INTERNAL MEDICINE/MEDICINE	92530369	RN64EPNH8JC6	92530369	RN64EPNH8JC6	US	34.070199	-118.45102	577505	U_OF_CALIFORNIA_LOS_ANGELES	LOS ANGELES	CA	SCHOOLS OF MEDICINE	900952000	UNITED STATES	N	40513	40877	837	Other Research-Related	2011	108000	NHLBI	108000	Public	FALSE	FALSE	NHLBI	8436419	41011		4R00HL102223-02	R00
NIGMS	7886807	7/14/10 0:00	PA-07-297	5K99GM088413-02	5	K99	GM	88413	2		CARTER ANTHONY D	8/1/09 0:00	6/30/11 0:00	ZGM1-BRT-9(KR)	6863009	13	GENETICS	621889815	QHF5ZZ114M72	621889815	QHF5ZZ114M72	US	40.8415	-73.9414	1833205	COLUMBIA_U_HEALTH_SCI	NEW YORK	NY	SCHOOLS OF MEDICINE	100323725	UNITED STATES	N	40391	40724	859	Other Research-Related	7/2/05 0:00	5/29/46 0:00	NIGMS	90000	Private	TRUE	FALSE	NIGMS	8267761	40714	PA-07-297	4R00GM088413-03	R00
NINDS	9915985	6/15/20 0:00	PAR-18-814	5K99NS111731-02	5	K99	NS	111731	2		DAVID KAREN KATE	6/1/19 0:00	5/31/21 0:00	ZNS1-SRB-L(15)	10737936	12	INTERNAL MEDICINE/MEDICINE	94878337	KMH5K9V7S518	94878337	KMH5K9V7S518	US	37.767442	-122.413937	577508	U_OF_CALIFORNIA_SAN_FRANCISCO	SAN FRANCISCO	CA	SCHOOLS OF MEDICINE	941432510	UNITED STATES	N	43983	44347	853	Other Research-Related	7/12/05 0:00	8/25/79 0:00	NINDS	102141	public	FALSE	FALSE	NINDS	10311140	##########	PAR-18-814	4R00NS111731-03	R00
NICHD	8175521	9/2/11 0:00	PA-10-063	1K99HD069624-01	1	K99	HD	69624	1		URV TIINA K	9/10/11 0:00	8/31/12 0:00	Developmental Biology Study Section[CHHD-C]	10384717	52	NEUROSCIENCES	804355790	UYTTZT6G9DT1	804355790	UYTTZT6G9DT1	US	32.876991	-117.24087	577507	U_OF_CALIFORNIA_SAN_DIEGO	LA JOLLA	CA	SCHOOLS OF MEDICINE	920930621	UNITED STATES	N	40796	41152	865	Other Research-Related	7/3/05 0:00	8/23/22 0:00	NICHD	81320	public	FALSE	FALSE	NICHD	8624753	41436	PA-10-063	4R00HD069624-02	R00
NIA	7667734	7/15/09 0:00	PA-07-297	5K99AG029879-02	5	K99	AG	29879	2		NIELSEN LISBETH	8/15/08 0:00	7/31/10 0:00	Behavior and Social Science of Aging Study Section[NIA-S]	6069755	12	NONE	73133571	GNJ7BBP73WE9	73133571	GNJ7BBP73WE9	US	42.275494	-83.743038	1506502	U_OF_MICHIGAN_AT_ANN_ARBOR	ANN ARBOR	MI	SCHOOLS OF SOCIAL WELFARE/WORK	481091276	UNITED STATES	N	40026	40390	866	Other Research-Related	7/1/05 0:00	9/4/67 0:00	NIA	97768	Public	TRUE	TRUE	NIA	8129098	40442	PA-10-063	4R00AG029879-03	R00
NIA	8324514	8/8/12 0:00	PA-10-063	5K99AG040184-02	5	K99	AG	40184	2		MILLER MARILYN	9/1/11 0:00	8/31/13 0:00	Basic Neuroscience of Aging Study Section[NIA-N]	9497902	7	INTERNAL MEDICINE/MEDICINE	605799469	HD1WMN6945W6	605799469	HD1WMN6945W6	US	47.660307	-122.315168	9087701	U_OF_WASHINGTON	SEATTLE	WA	SCHOOLS OF MEDICINE	981959472	UNITED STATES	N	41153	41517	866	Other Research-Related	7/4/05 0:00	1/5/46 0:00	NIA	89856	Public	FALSE	TRUE	NIA	8719425	41509	PA-10-063	4R00AG040184-03	R00
NIDDK	7575724	3/17/09 0:00	PA-07-297	5K99DK078668-02	5	K99	DK	78668	2		PODSKALNY JUDITH M	4/1/08 0:00	8/31/09 0:00	Digestive Diseases and Nutrition C Study Section[DDK-C]	8795531	49	UnavaiLABle	20520466	PHMKYKKJLQS1	20520466	PHMKYKKJLQS1	US	32.9036	-117.24298	1180101	SANFORD_BURNHAM_PREBYS_MED_DISCOVERY_INST	LA JOLLA	CA	Research Institutes	920371005	UNITED STATES	N	39904	40056	847	Other Research-Related	7/1/05 0:00	5/29/46 0:00	NIDDK	90000	Private	FALSE	FALSE	NIDDK	7920508	40056	PA-09-036	4R00DK078668-03	R00
NCI	10301623	6/25/21	PA-20-188	1K99CA255844-01A1	1	K99	CA	255844	1	A	SCHMIDT MICHAEL K	7/1/21	6/30/23	Transition to Independence Study Section (I)[NCI-I]	11826207	7	MISCELLANEOUS	1425594	E2NYLCDML6V1	1425594	E2NYLCDML6V1	US	42.359128	-71.093339	4911501	MASSACHUSETTS_INST_OF_TECH	CAMBRIDGE	MA	ORGANIZED RESEARCH UNITS	21421029	UNITED STATES	N	7/1/21	6/30/22	398	Other Research-Related	7/13/05 0:00	7/23/21 0:00	NCI	153972	Private	FALSE	FALSE	NCI	10682653	8/29/22	PA-20-188	4R00CA255844-03	R00
NHLBI	7989344	40399	PA-09-036	1K99HL098342-01A1	1	K99	HL	98342	1	A	ROTHGEB ANN E	40404	40800	ZHL1-CSR-Z(M2)	9752499	2	PHYSIOLOGY	41027822	EB8ASJBCFER9	41027822	EB8ASJBCFER9	US	43.711386	-72.270611	2021601	DARTMOUTH_COLL	HANOVER	NH	SCHOOLS OF MEDICINE	37551421	UNITED STATES	N	40404	40800	837	Other Research-Related	2010	111067	NHLBI	111067	Private	FALSE	FALSE	NHLBI	8326799	40798		4R00HL098342-02	R00
NHGRI	8564428	8/8/13 0:00	PA-11-197	1K99HG007356-01	1	K99	HG	7356	1		PAZIN MICHAEL J	8/8/13 0:00	7/31/14 0:00	Genome Research Study Section[GNOM-G]	10753790	18	GENETICS	9214214	HJD6G4D6TJY5	9214214	HJD6G4D6TJY5	US	37.426852	-122.17047	8046501	STANFORD_U	STANFORD	CA	SCHOOLS OF MEDICINE	943052004	UNITED STATES	N	41494	41851	172	Other Research-Related	7/5/05 0:00	4/22/58 0:00	NHGRI	94346	Private	FALSE	FALSE	NHGRI	8898931	41873	PA-11-197	4R00HG007356-02	R00
NIDCD	8959922	42324	PA-14-042	5K99DC013828-02	5	K99	DC	13828	2		RIVERA-RENTAS ALBERTO L	41974	42613	Communication Disorders Review Committee[CDRC]	11368543	7	PSYCHOLOGY	160079455	EXZVPWZBLUE8	160079455	EXZVPWZBLUE8	US	42.050479	-87.680046	6144601	NORTHWESTERN_U	Chicago	IL	SCHOOLS OF ARTS AND SCIENCES	606114579	UNITED STATES	N	42339	42613	173	Other Research-Related	2016	137441	NIDCD	137441	Private	TRUE	FALSE	NIDCD	9337601	42629	PA-14-042	4R00DC013828-03	R00
NINR	8279168	6/11/12 0:00	PA-10-063	5K99NR012773-02	5	K99	NR	12773	2		HUSS KAREN	7/1/11 0:00	12/31/12 0:00	Nursing Science Review Committee[NRRC(49)]	10432618	12	OTHER HEALTH PROFESSIONS	94878337	KMH5K9V7S518	94878337	KMH5K9V7S518	US	37.767442	-122.413937	577508	U_OF_CALIFORNIA_SAN_FRANCISCO	SAN FRANCISCO	CA	SCHOOLS OF NURSING	941432510	UNITED STATES	N	41091	41274	361	Other Research-Related	7/4/05 0:00	3/31/40 0:00	NINR	87750	public	FALSE	FALSE	NINR	8575617	41348	PA-10-063	4R00NR012773-03	R00
NICHD	8066307	7/15/11 0:00	PA-09-036	5K99HD060947-02	5	K99	HD	60947	2		LAMAR CHARISEE A	4/26/10 0:00	1/31/13 0:00	Reproduction Andrology and Gynecology Study Section[CHHD-R]	6719932	52	OBSTETRICS & GYNECOLOGY	804355790	UYTTZT6G9DT1	804355790	UYTTZT6G9DT1	US	32.876991	-117.24087	577507	U_OF_CALIFORNIA_SAN_DIEGO	LA JOLLA	CA	SCHOOLS OF MEDICINE	920930621	UNITED STATES	N	40787	41305	865	Other Research-Related	7/3/05 0:00	12/14/54 0:00	NICHD	93121	public	TRUE	TRUE	NICHD	8547860	41296		4R00HD060947-03	R00
NHLBI	8842196	42124	PA-11-197	5K99HL122360-02	5	K99	HL	122360	2		WANG WAYNE C	41760	42277	ZHL1-CSR-P(F1)	9635918	12	ANATOMY/CELL BIOLOGY	94878337	KMH5K9V7S518	94878337	KMH5K9V7S518	US	37.767442	-122.413937	577508	U_OF_CALIFORNIA_SAN_FRANCISCO	SAN FRANCISCO	CA	SCHOOLS OF MEDICINE	941432510	UNITED STATES	N	42125	42277	837	Other Research-Related	2015	95184	NHLBI	95184	public	FALSE	FALSE	NHLBI	9203661	42401	PA-11-197	4R00HL122360-03	R00
NHLBI	9617795	12/21/18 0:00	PA-16-193	5K99HL136695-02	5	K99	HL	136695	2		WANG WAYNE C	1/1/18 0:00	7/31/19 0:00	NHLBI Mentored Transition to Independence Study Section[MTI(OA)]	11660285	1	UnavaiLABle	71284913	JZD1HLM2ZU83	71284913	JZD1HLM2ZU83	US	39.140663	-84.501007	615001	CINCINNATI_CHILDRENS_HOSP_MED_CTR	CINCINNATI	OH	Independent Hospitals	452293039	UNITED STATES	N	43466	43677	837	Other Research-Related	7/11/05 0:00	5/8/53 0:00	NHLBI	129060	Private	FALSE	FALSE	NHLBI	9966308	43677	PA-16-193	4R00HL136695-03	R00
NHLBI	9734147	6/8/19 0:00	PA-16-193	5K99HL140139-02	5	K99	HL	140139	2		GALIS ZORINA S	7/1/18 0:00	8/14/19 0:00	NHLBI Mentored Transition to Independence Study Section[MTI(MA)]	14804761	12	INTERNAL MEDICINE/MEDICINE	966668691	N4WWJC8T2593	809593387; 966668691	JJJNQAJY5RN6; N4WWJC8T2593	US	33.470962	-81.991405	676605	AUGUSTA_U	AUGUSTA	GA	SCHOOLS OF MEDICINE	309120004	UNITED STATES	N	43647	43691	837	Other Research-Related	7/11/05 0:00	3/29/16 0:00	NHLBI	115506	Public	FALSE	FALSE	NHLBI	9967230	43684	PA-16-193	4R00HL140139-03	R00
NIDCR	7867709	2/26/10 0:00	PA-09-036	1K99DE020855-01	1	K99	DE	20855	1		FRIEDEN LESLIE A	3/1/10 0:00	1/31/11 0:00	NIDCR Special Grants Review Committee[DSR]	9876662	13	ANATOMY/CELL BIOLOGY	78861598	C8H9CNG1VBD9	78861598	C8H9CNG1VBD9	US	40.790284	-73.946781	3839801	ICAHN_SCH_OF_MED_AT_MOUNT_SINAI	NEW YORK	NY	SCHOOLS OF MEDICINE	100296574	UNITED STATES	N	40238	40574	121	Other Research-Related	7/2/05 0:00	11/11/64 0:00	NIDCR	96741	Private	TRUE	FALSE	NIDCR	8201706	40555		4R00DE020855-02	R00
NIDDK	7995590	12/16/09 0:00	PA-07-297	3K99DK078917-02S1	3	K99	DK	78917	2	S	RANKIN TRACY L	12/16/09 0:00	11/30/10 0:00	Kidney Urologic and Hematologic Diseases D Study Section[DDK-D]	8082444	18	INTERNAL MEDICINE/MEDICINE	4514360	MKAGLD59JRL1	4514360	MKAGLD59JRL1	US	40.440909	-79.959125	2059802	U_OF_PITTSBURGH_AT_PITTSBURGH	PITTSBURGH	PA	SCHOOLS OF MEDICINE	152133320	UNITED STATES	N	40163	40512	701	Other Research-Related	7/2/05 0:00	12/5/39 0:00	NIDDK	51109	Public	TRUE	TRUE	NIDDK	8049894	40301	PA-06-133	4R00DK078917-03	R00
NIGMS	7741206	11/16/09 0:00	PA-07-297	5K99GM086517-02	5	K99	GM	86517	2		CARTER ANTHONY D	12/1/08 0:00	11/30/10 0:00	ZGM1-BRT-9(KR)	7983054	7	UnavaiLABle	78200995	HMSNCM57QNR5	78200995	HMSNCM57QNR5	US	47.627342	-122.331593	861001	FRED_HUTCHINSON_CANCER_RES_CTR	SEATTLE	WA	Research Institutes	981094433	UNITED STATES	N	40148	40512	859	Other Research-Related	7/2/05 0:00	5/29/46 0:00	NIGMS	90000	Private	FALSE	FALSE	NIGMS	8181834	40525	PA-10-063	4R00GM086517-03	R00
NIAID	9512739	6/4/18 0:00	PA-16-193	5K99AI128029-02	5	K99	AI	128029	2		LU KRISTINA	7/1/17 0:00	11/30/19 0:00	Microbiology and Infectious Diseases B Research Study Section[MID-B]	9018789	7	MICROBIOLOGY/IMMUN/VIROLOGY	98987217	W8XEAJDKMXH3	98987217	W8XEAJDKMXH3	US	41.871509	-87.667721	577703	U_OF_ILLINOIS_AT_CHICAGO	Chicago	IL	SCHOOLS OF MEDICINE	606124305	UNITED STATES	N	43282	43799	855	Other Research-Related	7/10/05 0:00	6/12/43 0:00	NIAID	125442	Public	FALSE	FALSE	NIAID	10046756	43829	PA-16-193	4R00AI128029-03	R00
NIMH	9542389	7/14/18 0:00	PA-16-193	5K99MH113821-02	5	K99	MH	113821	2		SARAMPOTE CHRISTOPHER S	8/9/17 0:00	6/30/19 0:00	ZMH1-ERB-X(04)	12659393	10	PSYCHOLOGY	49179401	F4N1QNPB95M4	49179401	F4N1QNPB95M4	US	40.81207	-73.954377	1833202	COLUMBIA_U_NEW_YORK_MORNINGSIDE	NEW YORK	NY	GRADUATE SCHOOLS	100276900	UNITED STATES	N	43313	43646	242	Other Research-Related	7/10/05 0:00	8/9/37 0:00	NIMH	123309	Private	TRUE	FALSE	NIMH	9983864	43680	PA-16-193	4R00MH113821-03	R00
NIA	9599327	9/19/18 0:00	PA-16-193	1K99AG058800-01A1	1	K99	AG	58800	1	A	FULDNER REBECCA A	9/30/18 0:00	8/31/19 0:00	Biological Aging Study Section[NIA-B]	9714653	3	VETERINARY SCIENCES	43207562	FL6GV84CKN57	43207562	FL6GV84CKN57	US	41.310925	-72.926428	9420201	YALE_U	NEW HAVEN	CT	SCHOOLS OF MEDICINE	65208327	UNITED STATES	N	43373	43708	866	Other Research-Related	7/10/05 0:00	11/21/77 0:00	NIA	101499	Private	FALSE	FALSE	NIA	9995783	43715	PA-16-193	4R00AG058800-02	R00
NIGMS	9487258	6/4/18 0:00	PA-16-077	5K99GM121815-02	5	K99	GM	121815	2		SESMA MICHAEL A	6/1/17 0:00	3/31/19 0:00	ZGM1-TWD-A(KR)	9800963	13	BIOCHEMISTRY	621889815	QHF5ZZ114M72	621889815	QHF5ZZ114M72	US	40.8415	-73.9414	1833205	COLUMBIA_U_HEALTH_SCI	NEW YORK	NY	SCHOOLS OF MEDICINE	100323725	UNITED STATES	N	43252	43555	859	Other Research-Related	7/10/05 0:00	5/29/46 0:00	NIGMS	90000	Private	FALSE	FALSE	NIGMS	9849410	43556	PA-16-077	4R00GM121815-03	R00
NICHD	8516081	8/7/13 0:00	PA-11-197	5K99HD069410-02	5	K99	HD	69410	2		MOSS STUART B	9/1/12 0:00	8/31/14 0:00	Reproduction Andrology and Gynecology Study Section[CHHD-R]	7245267	7	PHYSIOLOGY	605799469	HD1WMN6945W6	605799469	HD1WMN6945W6	US	47.660307	-122.315168	9087701	U_OF_WASHINGTON	SEATTLE	WA	SCHOOLS OF MEDICINE	981959472	UNITED STATES	N	41518	41882	865	Other Research-Related	7/5/05 0:00	2/4/45 0:00	NICHD	89521	Public	FALSE	FALSE	NICHD	8913352	41885	PA-11-197	4R00HD069410-03	R00
NIGMS	8841781	3/31/15 0:00	PA-11-197	5K99GM108865-02	5	K99	GM	108865	2		SESMA MICHAEL A	5/1/14 0:00	10/28/16 0:00	ZGM1-TRN-Y(KR)	11135146	52	INTERNAL MEDICINE/MEDICINE	804355790	UYTTZT6G9DT1	804355790	UYTTZT6G9DT1	US	32.876991	-117.24087	577507	U_OF_CALIFORNIA_SAN_DIEGO	LA JOLLA	CA	SCHOOLS OF MEDICINE	920930621	UNITED STATES	N	42095	42671	859	Other Research-Related	7/7/05 0:00	5/25/46 0:00	NIGMS	89996	public	FALSE	FALSE	NIGMS	9460085	42835	PA-11-197	4R00GM108865-03	R00
NICHD	7840464	9/10/09 0:00	PA-07-297	5K99HD057553-02	5	K99	HD	57553	2		NEWCOMER SUSAN	9/15/08 0:00	8/31/10 0:00	Behavioral and Social Consequences of HIV/AIDS Study Section[BSCH]	6703381	7	MISCELLANEOUS	605799469	HD1WMN6945W6	605799469	HD1WMN6945W6	US	47.660307	-122.315168	9087701	U_OF_WASHINGTON	SEATTLE	WA	SCHOOLS OF ARTS AND SCIENCES	981959472	UNITED STATES	N	40057	40421	864	Other Research-Related	7/1/05 0:00	8/13/42 0:00	NICHD	88615	Public	TRUE	TRUE	NICHD	8145369	40448	PA-07-297	4R00HD057553-03	R00
NICHD	9568356	7/18/18 0:00	PA-16-193	5K99HD091375-02	5	K99	HD	91375	2		CRUZ THERESA	9/22/17 0:00	8/31/19 0:00	Function Integration and Rehabilitation Sciences Study Section[CHHD-K]	11298443	45	NEUROLOGY	46705849	MJC5FCYQTPE6	46705849	MJC5FCYQTPE6	US	33.64852	-117.82136	577504	U_OF_CALIFORNIA-IRVINE	IRVINE	CA	SCHOOLS OF MEDICINE	926970001	UNITED STATES	N	43344	43708	865	Other Research-Related	7/10/05 0:00	5/14/69 0:00	NICHD	98386	Public	FALSE	FALSE	NICHD	9894945	43606	PA-16-193	4R00HD091375-03	R00
NICHD	9858381	1/27/20 0:00	PA-18-398	5K99HD097298-02	5	K99	HD	97298	2		TOYAMA REIKO	2/1/19 0:00	6/29/21 0:00	Developmental Biology Study Section[CHHD-C]	10188397	12	BIOCHEMISTRY	2484665	NJ1YPQXQG7U5	2484665	NJ1YPQXQG7U5	US	40.345441	-74.655866	6661401	PRINCETON_U	Princeton	NJ	SCHOOLS OF ARTS AND SCIENCES	85406000	UNITED STATES	N	43862	44376	865	Other Research-Related	7/12/05 0:00	11/24/77 0:00	NICHD	101502	Private	FALSE	FALSE	NICHD	10438096	##########	PA-18-398	4R00HD097298-03	R00
NIGMS	9772509	9/19/19 0:00	PA-16-193	5K99GM128180-02	5	K99	GM	128180	2		SESMA MICHAEL A	9/1/18 0:00	8/31/20 0:00	ZGM1-TWD-Y(KR)	10561866	18	PHARMACOLOGY	9214214	HJD6G4D6TJY5	9214214	HJD6G4D6TJY5	US	37.426852	-122.17047	8046501	STANFORD_U	STANFORD	CA	SCHOOLS OF MEDICINE	943052004	UNITED STATES	N	43709	44074	859	Other Research-Related	7/11/05 0:00	5/29/46 0:00	NIGMS	90000	Private	FALSE	FALSE	NIGMS	10382634	44321	PA-16-193	4R00GM128180-03	R00
NINDS	7787049	9/26/09 0:00	PA-09-036	1K99NS065120-01A1	1	K99	NS	65120	1	A	BABCOCK DEBRA J	9/25/09 0:00	8/31/10 0:00	NST-2 Study Section [NST-2]	8926441	12	NEUROSURGERY	94878337	KMH5K9V7S518	94878337	KMH5K9V7S518	US	37.767442	-122.413937	577508	U_OF_CALIFORNIA_SAN_FRANCISCO	SAN FRANCISCO	CA	SCHOOLS OF MEDICINE	941432510	UNITED STATES	N	40081	40421	853	Other Research-Related	7/1/05 0:00	12/26/61 0:00	NINDS	132214	public	TRUE	TRUE	NINDS	8134632	40422	PA-10-063	4R00NS065120-02	R00
NICHD	9119847	6/24/16 0:00	PA-14-042	5K99HD081273-02	5	K99	HD	81273	2		ESPOSITO LAYLA E	8/3/15 0:00	7/31/17 0:00	Health Behavior and Context Study Section[CHHD-M]	11206199	1	NONE	5421136	ZUE9HKT2CLC9	5421136	ZUE9HKT2CLC9	US	41.789554	-87.601172	1413601	U_OF_CHICAGO	CHICAGO	IL	SCHOOLS OF SOCIAL WELFARE/WORK	606372612	UNITED STATES	N	42552	42947	865	Other Research-Related	7/8/05 0:00	11/8/89 0:00	NICHD	105869	private	FALSE	FALSE	NICHD	9536278	42972	PA-14-042	4R00HD081273-03	R00
NLM	10059265	10/29/20	PA-19-130	5K99LM013089-02	5	K99	LM	13089	2		WANG YANLI	12/1/19	1/31/22	ZLM1-YW-C(01)	15515094	18	MISCELLANEOUS	4514360	MKAGLD59JRL1	4514360	MKAGLD59JRL1	US	40.440909	-79.959125	2059802	U_OF_PITTSBURGH_AT_PITTSBURGH	PITTSBURGH	PA	SCHOOLS OF MEDICINE	152133320	UNITED STATES	N	12/1/20	1/31/22	879	Other Research-Related	7/13/05 0:00	7/13/50 0:00	NLM	91506	Public	TRUE	TRUE	NLM	10548543	2/7/22	PA-19-130	4R00LM013089-03	R00
NEI	9068138	4/25/16 0:00	PA-14-042	5K99EY024992-02	5	K99	EY	24992	2		AGARWAL NEERAJ	6/1/15 0:00	5/31/17 0:00	ZEY1-VSN(03)	11740238	11	PHARMACOLOGY	77758407	HJMKEF7EJW69	77758407	HJMKEF7EJW69	US	41.502739	-81.607334	218601	CASE_WESTERN_RESERVE_U	CLEVELAND	OH	SCHOOLS OF MEDICINE	441061712	UNITED STATES	N	42522	42886	867	Other Research-Related	7/8/05 0:00	11/18/66 0:00	NEI	97478	Private	FALSE	FALSE	NEI	9483938	42955	PA-14-042	4R00EY024992-04	R00
NCI	10112859	2/26/21	PA-19-130	5K99CA248944-02	5	K99	CA	248944	2		RADAEV SERGEY	3/1/20	6/30/22	Transition to Independence Study Section (I)[NCI-I]	15588534	21	PUBLIC HEALTH & PREV MEDICINE	800772162	C3KXNLTAAY98	800772162	C3KXNLTAAY98	US	29.513091	-98.577742	578418	U_OF_TEXAS_HLTH_SCI_CTR	SAN ANTONIO	TX	SCHOOLS OF MEDICINE	782293901	UNITED STATES	N	3/1/21	6/30/22	398	Other Research-Related	7/13/05 0:00	9/2/89 0:00	NCI	105802	Public	FALSE	FALSE	NCI	10620367	7/1/22	PA-19-130	4R00CA248944-03	R00
NIAID	8663991	41500	RFA-OD-13-199	3K99AI093884-01A1S1	3	K99	AI	93884	1	A1S	PROGRAIS LAWRENCE J	41501	42094		10441085	12	PATHOLOGY	121911077	M5SZJ6VHUHN8	121911077	M5SZJ6VHUHN8	US	40.669895	-73.974354	5998304	NEW_YORK_U_SCH_OF_MED	NEW YORK	NY	SCHOOLS OF MEDICINE	10016	UNITED STATES	N	41501	42094	95	Other Research-Related	2013	53767	OD	53767	Private	FALSE	FALSE	NIAID	9039860	42185	PA-11-197	4R00AI093884-02	R00
NIDDK	9734071	7/10/19 0:00	PA-16-193	5K99DK115895-02	5	K99	DK	115895	2		COOKE BRAD	7/1/18 0:00	6/30/21 0:00	Diabetes Endocrinology and Metabolic Diseases B Study Section[DDK-B]	10688288	18	PSYCHIATRY	9214214	HJD6G4D6TJY5	9214214	HJD6G4D6TJY5	US	37.426852	-122.17047	8046501	STANFORD_U	STANFORD	CA	SCHOOLS OF MEDICINE	943052004	UNITED STATES	N	43647	44377	847	Other Research-Related	7/11/05 0:00	5/29/46 0:00	NIDDK	90000	Private	FALSE	FALSE	NIDDK	10409049	44379	PA-16-193	4R00DK115895-03	R00
NIDDK	9349486	9/4/17 0:00	PA-15-083	5K99DK110534-02	5	K99	DK	110534	2		SASLOWSKY DAVID E	9/8/16 0:00	11/30/17 0:00	Digestive Diseases and Nutrition C Study Section[DDK-C]	11298051	27	NONE	9584210	U2JMKHNS5TG4	9584210	U2JMKHNS5TG4	US	34.134332	-118.12652	1073501	CALIFORNIA_INST_OF_TECH	PASADENA	CA	SCHOOLS OF ARTS AND SCIENCES	911250001	UNITED STATES	N	42979	43069	847	Other Research-Related	7/9/05 0:00	8/17/38 0:00	NIDDK	87158	Private	FALSE	FALSE	NIDDK	9646468	43202	PA-15-083	4R00DK110534-03	R00
NHLBI	9143791	42591	PA-14-042	5K99HL123638-02	5	K99	HL	123638	2		WELNIAK LISBETH A	42262	42978	NHLBI Mentored Transition to Independence Study Section[MTI(JA)]	10572784	5	INTERNAL MEDICINE/MEDICINE	555917996	KABJZBBJ4B54	555917996	KABJZBBJ4B54	US	44.975143	-93.227003	1450402	U_OF_MINNESOTA	MINNEAPOLIS	MN	SCHOOLS OF MEDICINE	554552070	UNITED STATES	N	42614	42978	837	Other Research-Related	2016	95176	NHLBI	95176	Public	TRUE	TRUE	NHLBI	9514428	42942	PA-14-042	4R00HL123638-03	R00
NIMH	8880289	7/1/15 0:00	PA-11-197	5K99MH102349-02	5	K99	MH	102349	2		SARAMPOTE CHRISTOPHER S	7/1/14 0:00	6/30/16 0:00	ZMH1-ERB-L(03)	8959614	7	UnavaiLABle	155342439	DKMDCB5HNBL7	155342439	DKMDCB5HNBL7	US	39.298699	-76.593679	2370003	HUGO_W_MOSER_RES_INST_KENNEDY_KRIEGER	BALTIMORE	MD	Research Institutes	212051832	UNITED STATES	N	42186	42551	242	Other Research-Related	7/7/05 0:00	6/6/54 0:00	NIMH	92930	Private	FALSE	FALSE	NIMH	9185523	42564	PA-11-197	4R00MH102349-03	R00
NEI	7952772	40385	PA-09-036	1K99EY020844-01	1	K99	EY	20844	1		STEINMETZ MICHAEL A	40391	40755	ZEY1-VSN(10)	10212415	7	BIOLOGY	47006379	JDLVAVGYJQ21	47006379	JDLVAVGYJQ21	US	42.335672	-71.104237	3212902	HARVARD_MED_SCH	BOSTON	MA	SCHOOLS OF MEDICINE	21201616	UNITED STATES	N	40391	40755	867	Other Research-Related	2010	87395	NEI	87395	Private	FALSE	FALSE	NEI	8311181	40791	PA-09-036	4R00EY020844-03	R00
NINDS	8550549	7/25/13 0:00	PA-11-197	5K99NS080985-02	5	K99	NS	80985	2		GUBITZ AMELIE	9/28/12 0:00	6/14/14 0:00	NST-2 Study Section [NST-2]	12198008	3	PATHOLOGY	42250712	GM1XX56LEP58	42250712	GM1XX56LEP58	US	39.953462	-75.193983	6463801	U_OF_PENNSYLVANIA	PHILADELPHIA	PA	SCHOOLS OF MEDICINE	191046205	UNITED STATES	N	41545	41804	853	Other Research-Related	7/5/05 0:00	9/24/03 0:00	NINDS	74412	Private	FALSE	FALSE	NINDS	8849550	41795	PA-11-197	4R00NS080985-03	R00
NIAID	8382892	5/7/12 0:00	PA-11-197	1K99AI097286-01A1	1	K99	AI	97286	1	A	PROGRAIS LAWRENCE J	5/10/12 0:00	4/30/13 0:00	Allergy Immunology and Transplantation Research Committee[AITC]	10826866	52	BIOLOGY	804355790	UYTTZT6G9DT1	804355790	UYTTZT6G9DT1	US	32.876991	-117.24087	577507	U_OF_CALIFORNIA_SAN_DIEGO	LA JOLLA	CA	SCHOOLS OF ARTS AND SCIENCES	920930621	UNITED STATES	N	41039	41394	855	Other Research-Related	7/4/05 0:00	5/29/46 0:00	NIAID	90000	public	FALSE	FALSE	NIAID	8819199	41768	PA-11-197	4R00AI097286-02	R00
NHLBI	8719166	7/22/14 0:00	PA-11-197	5K99HL119353-02	5	K99	HL	119353	2		CARLSON DREW E	8/9/13 0:00	7/31/15 0:00	ZHL1-CSR-P(M2)	9425513	1	UnavaiLABle	71284913	JZD1HLM2ZU83	71284913	JZD1HLM2ZU83	US	39.140663	-84.501007	615001	CINCINNATI_CHILDRENS_HOSP_MED_CTR	CINCINNATI	OH	Independent Hospitals	452293039	UNITED STATES	N	41852	42216	837	Other Research-Related	7/6/05 0:00	11/23/58 0:00	NHLBI	131085	Private	FALSE	FALSE	NHLBI	9091991	42233	PA-11-197	4R00HL119353-03	R00
NIMH	9547934	7/25/18 0:00	PA-16-193	5K99MH110596-02	5	K99	MH	110596	2		SARAMPOTE CHRISTOPHER S	8/21/17 0:00	7/31/19 0:00	ZMH1-ERB-X(04)	11955507	2	PEDIATRICS	161202122	LCLSJAGTNZQ7	161202122	LCLSJAGTNZQ7	US	43.068519	-89.400858	578503	U_OF_WISCONSIN-MADISON	MADISON	WI	GRADUATE SCHOOLS	537151218	UNITED STATES	N	43313	43677	242	Other Research-Related	7/10/05 0:00	12/12/68 0:00	NIMH	134757	public	TRUE	TRUE	NIMH	9794968	43661	PA-16-193	4R00MH110596-03	R00
NHLBI	7246387	39051	PA-06-133	1K99HL088317-01	1	K99	HL	88317	1		SCOTT JANE	39052	39416	ZHL1-CSR-M(F1)	8670141	4	INTERNAL MEDICINE/MEDICINE	44387793	TP7EK8DZV6N5	44387793	TP7EK8DZV6N5	US	36.007766	-78.926475	2221101	DUKE_U	DURHAM	NC	SCHOOLS OF MEDICINE	277054673	UNITED STATES	N	39052	39416	837	Other Research-Related	2007	85606	NHLBI	85606	Private	TRUE	FALSE	NHLBI	7506387	39443	PA-07-297	4R00HL088317-03	R00
NIDCR	10234139	7/8/21	PAR-19-144	5K99DE029756-02	5	K99	DE	29756	2		BROWN ANISSA F	8/10/20	7/31/22	NIDCR Special Grants Review Committee[DSR]	14077445	12	NONE	73133571	GNJ7BBP73WE9	73133571	GNJ7BBP73WE9	US	42.275494	-83.743038	1506502	U_OF_MICHIGAN_AT_ANN_ARBOR	ANN ARBOR	MI	SCHOOLS OF DENTISTRY/ORAL HYGN	481091276	UNITED STATES	N	8/1/21	7/31/22	121	Other Research-Related	7/13/05 0:00	6/10/81 0:00	NIDCR	139320	Public	FALSE	TRUE	NIDCR	10607169	7/19/22	PAR-19-144	4R00DE029756-03	R00
NINR	8921278	8/17/15 0:00	PA-11-197	5K99NR015106-02	5	K99	NR	15106	2		YOON SUNG SUG	9/5/14 0:00	8/31/16 0:00	Nursing Science Review Committee[NRRC(59)]	9811572	18	PEDIATRICS	4514360	MKAGLD59JRL1	4514360	MKAGLD59JRL1	US	40.440909	-79.959125	2059802	U_OF_PITTSBURGH_AT_PITTSBURGH	PITTSBURGH	PA	SCHOOLS OF MEDICINE	152133320	UNITED STATES	N	42248	42613	361	Other Research-Related	7/7/05 0:00	11/19/36 0:00	NINR	86522	Public	TRUE	TRUE	NINR	9329841	42614	PA-11-197	4R00NR015106-03	R00
NIGMS	9762944	9/16/19 0:00	PA-16-193	5K99GM127757-02	5	K99	GM	127757	2		FLICKER PAULA F	9/1/18 0:00	12/31/19 0:00	ZGM1-TWD-Y(KR)	10440962	52	OTHER BASIC SCIENCES	804355790	UYTTZT6G9DT1	804355790	UYTTZT6G9DT1	US	32.876991	-117.24087	577507	U_OF_CALIFORNIA_SAN_DIEGO	LA JOLLA	CA	SCHOOLS OF MEDICINE	920930621	UNITED STATES	N	43709	43830	859	Other Research-Related	7/11/05 0:00	2/18/82 0:00	NIGMS	30000	public	FALSE	FALSE	NIGMS	10087571	43914	PA-16-193	4R00GM127757-03	R00
NIA	9785353	8/5/19 0:00	PA-16-193	5K99AG056656-03	5	K99	AG	56656	3		GUO MAX	9/15/18 0:00	3/31/21 0:00	Basic Neuroscience of Aging Study Section[NIA-N]	14425417	14	UnavaiLABle	81266487	H6N1ZF5HJ2G3	81266487	H6N1ZF5HJ2G3	US	40.85103	-73.844379	10053556	ALBERT_EINSTEIN_COLL_OF_MED	BRONX	NY	Domestic Higher Education	104611900	UNITED STATES	N	43709	44286	866	Other Research-Related	7/11/05 0:00	3/14/72 0:00	NIA	135945	Private	FALSE	FALSE	NIA	10369167	##########	PA-16-193	4R00AG056656-04	R00
NHLBI	8894591	7/24/15 0:00	PA-11-197	5K99HL123484-02	5	K99	HL	123484	2		WELNIAK LISBETH A	8/1/14 0:00	7/31/16 0:00	ZHL1-CSR-P(M1)	11121779	7	UnavaiLABle	76593722	Z1L9F1MM1RY3	76593722	Z1L9F1MM1RY3	US	42.337481	-71.104964	1504801	BOSTON_CHILDRENS_HOSP	BOSTON	MA	Independent Hospitals	21155724	UNITED STATES	N	42217	42582	837	Other Research-Related	7/7/05 0:00	7/23/60 0:00	NHLBI	131693	Private	FALSE	FALSE	NHLBI	9306253	42604	PA-11-197	4R00HL123484-03	R00
NCI	8231654	6/1/11 0:00	PA-07-297	7K99CA140708-03	7	K99	CA	140708	3		SCHMIDT MICHAEL K	9/1/09 0:00	8/31/11 0:00	Institutional Training and Education Study Section (F)[NCI-F]	9560372	4	PHYSIOLOGY	608195277	D3LHU66KBLD5	608195277	D3LHU66KBLD5	US	35.9316	-79.057377	578206	U_OF_NORTH_CAROLINA_CHAPEL_HILL	CHAPEL HILL	NC	SCHOOLS OF MEDICINE	275995023	UNITED STATES	N	40697	40786	398	Other Research-Related	7/2/05 0:00	11/9/65 0:00	NCI	133628	Public	TRUE	TRUE	NCI	8312046	40784	PA-07-297	4R00CA140708-04	R00
NIGMS	8131603	40794	PA-09-036	5K99GM094335-02	5	K99	GM	94335	2		FLICKER PAULA F	40422	41060	ZGM1-BRT-9(KR)	9889014	7	BIOLOGY	47006379	JDLVAVGYJQ21	47006379	JDLVAVGYJQ21	US	42.335672	-71.104237	3212902	HARVARD_MED_SCH	BOSTON	MA	SCHOOLS OF MEDICINE	21201616	UNITED STATES	N	40787	41060	859	Other Research-Related	2011	45000	NIGMS	45000	Private	FALSE	FALSE	NIGMS	8509836	41120		4R00GM094335-03	R00
NEI	8601079	12/11/13 0:00	PA-11-197	5K99EY022910-02	5	K99	EY	22910	2		GREENWELL THOMAS	1/1/13 0:00	12/31/14 0:00	ZEY1-VSN(07)	11232546	7	ANATOMY/CELL BIOLOGY	605799469	HD1WMN6945W6	605799469	HD1WMN6945W6	US	47.660307	-122.315168	9087701	U_OF_WASHINGTON	SEATTLE	WA	SCHOOLS OF MEDICINE	981959472	UNITED STATES	N	41640	42004	867	Other Research-Related	7/6/05 0:00	5/29/46 0:00	NEI	90000	Public	FALSE	FALSE	NEI	8889375	41862	PA-11-197	4R00EY022910-03	R00
NIDDK	8713989	41891	PA-11-197	5K99DK097141-02	5	K99	DK	97141	2		HYDE JAMES F	41501	42004	Diabetes Endocrinology and Metabolic Diseases B Study Section[DDK-B]	11166217	12	ANATOMY/CELL BIOLOGY	121911077	M5SZJ6VHUHN8	121911077	M5SZJ6VHUHN8	US	40.669895	-73.974354	5998304	NEW_YORK_U_SCH_OF_MED	NEW YORK	NY	SCHOOLS OF MEDICINE	10016	UNITED STATES	N	41866	42004	847	Other Research-Related	2014	87692	NIDDK	87692	Private	FALSE	FALSE	NIDDK	8978406	42138	PA-11-197	4R00DK097141-03	R00
NHLBI	8785703	11/17/14 0:00	PA-11-197	5K99HL121076-02	5	K99	HL	121076	2		WANG WAYNE C	12/12/13 0:00	10/1/15 0:00	ZHL1-CSR-P(O1)	10974990	8	UnavaiLABle	73130411	FLJ7DQKLL226	73130411	FLJ7DQKLL226	US	42.363198	-71.068772	4907701	MASSACHUSETTS_GENERAL_HOSP	BOSTON	MA	Independent Hospitals	21142621	UNITED STATES	N	41974	42278	837	Other Research-Related	7/7/05 0:00	11/16/73 0:00	NHLBI	136557	Private	FALSE	FALSE	NHLBI	9172344	42384	PA-11-197	4R00HL121076-03	R00
NIAAA	9597854	8/27/18 0:00	PA-16-193	1K99AA026317-01A1	1	K99	AA	26317	1	A	FREEMAN ROBERT	9/1/18 0:00	8/31/20 0:00	Epidemiology Prevention and Behavior Research Study Section[AA-2]	14771745	7	PSYCHIATRY	605799469	HD1WMN6945W6	605799469	HD1WMN6945W6	US	47.660307	-122.315168	9087701	U_OF_WASHINGTON	SEATTLE	WA	SCHOOLS OF MEDICINE	981959472	UNITED STATES	N	43344	43708	273	Other Research-Related	7/10/05 0:00	6/18/32 0:00	NIAAA	121431	Public	FALSE	TRUE	NIAAA	9987771	43713	PA-16-193	4R00AA026317-02	R00
NHLBI	9546844	7/27/18 0:00	PA-16-193	5K99HL135403-02	5	K99	HL	135403	2		TIGNO XENIA	9/1/17 0:00	8/31/19 0:00	NHLBI Mentored Transition to Independence Study Section[MTI(MA)]	11689529	12	PHARMACOLOGY	94878337	KMH5K9V7S518	94878337	KMH5K9V7S518	US	37.767442	-122.413937	577508	U_OF_CALIFORNIA_SAN_FRANCISCO	SAN FRANCISCO	CA	SCHOOLS OF PHARMACY	941432510	UNITED STATES	N	43344	43708	838	Other Research-Related	7/10/05 0:00	5/31/70 0:00	NHLBI	171816	public	FALSE	TRUE	NHLBI	10044061	43797	PA-16-193	4R00HL135403-03	R00
NIA	9137631	4/30/16 0:00	PA-14-042	5K99AG050764-02	5	K99	AG	50764	2		YANG AUSTIN JYAN-YU	9/15/15 0:00	4/30/18 0:00	Basic Neuroscience of Aging Study Section[NIA-N]	12416078	49	UnavaiLABle	781613492	PHZJFZ32NKH4	781613492	PHZJFZ32NKH4	US	32.903062	-117.243592	7375802	SCRIPPS_RES_INST_THE	LA JOLLA	CA	Other Domestic Non-Profits	920371000	UNITED STATES	N	42491	43220	866	Other Research-Related	7/8/05 0:00	5/4/46 0:00	NIA	89975	Private	FALSE	FALSE	NIA	9830879	43458	PA-14-042	4R00AG050764-03	R00
NICHD	9252473	2/28/17 0:00	PA-15-083	5K99HD086232-02	5	K99	HD	86232	2		MAZLOOMDOOST DONNA	4/15/16 0:00	3/31/18 0:00	Population Sciences Study Section[CHHD-W]	11846767	12	OBSTETRICS & GYNECOLOGY	94878337	KMH5K9V7S518	94878337	KMH5K9V7S518	US	37.767442	-122.413937	577508	U_OF_CALIFORNIA_SAN_FRANCISCO	SAN FRANCISCO	CA	SCHOOLS OF MEDICINE	941432510	UNITED STATES	N	42826	43190	865	Other Research-Related	7/9/05 0:00	3/15/33 0:00	NICHD	158225	public	TRUE	TRUE	NICHD	9631804	43242	PA-15-083	4R00HD086232-03	R00
NINDS	8916944	8/28/14 0:00	PA-11-197	3K99NS079471-02S1	3	K99	NS	79471	2	S	CHEN DAOFEN	7/1/12 0:00	6/30/15 0:00	NST-2 Study Section [NST-2]	9630419	5	PSYCHOLOGY	965717143	GTNBNWXJ12D5	965717143	DWH7MSXKA2A8; GTNBNWXJ12D5	US	36.143381	-86.803365	8721001	VANDERBILT_U	Nashville	TN	SCHOOLS OF ARTS AND SCIENCES	372032408	UNITED STATES	N	41456	42185	853	Other Research-Related	7/6/05 0:00	6/15/19 0:00	NINDS	7106	Private	FALSE	FALSE	NINDS	9022588	42125	PA-11-197	4R00NS079471-03	R00
NHLBI	7323255	1/31/08 0:00	PA-06-133	5K99HL087614-02	5	K99	HL	87614	2		HUANG LI-SHIN	12/1/06 0:00	9/24/08 0:00	ZHL1-CSR-M(F1)	2291272	18	SURGERY	9214214	HJD6G4D6TJY5	9214214	HJD6G4D6TJY5	US	37.426852	-122.17047	8046501	STANFORD_U	STANFORD	CA	SCHOOLS OF MEDICINE	943052004	UNITED STATES	N	39417	39715	837	Other Research-Related	6/30/05 0:00	1/5/18 0:00	NHLBI	79629	Private	FALSE	FALSE	NHLBI	7651838	39715		4R00HL087614-03	R00
NIMHD	9784903	5/23/19 0:00	PA-16-193	5K99MD012813-02	5	K99	MD	12813	2		TYUS NADRA	9/13/18 0:00	8/31/20 0:00	ZMD1-XLN(M1)	15028671	18	INTERNAL MEDICINE/MEDICINE	4514360	MKAGLD59JRL1	4514360	MKAGLD59JRL1	US	40.440909	-79.959125	2059802	U_OF_PITTSBURGH_AT_PITTSBURGH	PITTSBURGH	PA	SCHOOLS OF MEDICINE	152133320	UNITED STATES	N	43617	44074	307	Other Research-Related	7/11/05 0:00	9/14/76 0:00	NIMHD	137590	Public	FALSE	TRUE	NIMHD	9993691	44062	PA-16-193	4R00MD012813-03	R00
NCI	8425727	1/3/13 0:00	PA-11-197	1K99CA172695-01	1	K99	CA	172695	1		SCHMIDT MICHAEL K	1/3/13 0:00	12/31/13 0:00	Transition to Independence Study Section (I)[NCI-I]	10718110	12	UnavaiLABle	64931884	KUKXRCZ6NZC2	64931884	KUKXRCZ6NZC2	US	40.764045	-73.956024	5079202	SLOAN-KETTERING_INST_CAN_RES	NEW YORK	NY	Research Institutes	100656007	UNITED STATES	N	41277	41639	398	Other Research-Related	7/5/05 0:00	8/25/48 0:00	NCI	90819	Private	FALSE	FALSE	NCI	8786620	41744	PA-11-197	4R00CA172695-02	R00
NCI	9127911	7/22/16 0:00	PA-14-042	5K99CA194163-02	5	K99	CA	194163	2		SCHMIDT MICHAEL K	8/17/15 0:00	4/30/17 0:00	Transition to Independence Study Section (I)[NCI-I]	11257997	7	BIOLOGY	47006379	JDLVAVGYJQ21	47006379	JDLVAVGYJQ21	US	42.335672	-71.104237	3212902	HARVARD_MED_SCH	BOSTON	MA	SCHOOLS OF MEDICINE	21201616	UNITED STATES	N	42583	42855	398	Other Research-Related	7/8/05 0:00	1/17/29 0:00	NCI	120183	Private	FALSE	FALSE	NCI	9467647	42852	PA-14-042	4R00CA194163-03	R00
NHLBI	9741792	6/8/19 0:00	PA-16-193	5K99HL143210-02	5	K99	HL	143210	2		HUANG LI-SHIN	7/9/18 0:00	6/30/20 0:00	NHLBI Mentored Transition to Independence Study Section[MTI(MA)]	14104869	52	INTERNAL MEDICINE/MEDICINE	804355790	UYTTZT6G9DT1	804355790	UYTTZT6G9DT1	US	32.876991	-117.24087	577507	U_OF_CALIFORNIA_SAN_DIEGO	LA JOLLA	CA	SCHOOLS OF MEDICINE	920930621	UNITED STATES	N	43647	44012	837	Other Research-Related	7/11/05 0:00	8/22/29 0:00	NHLBI	156924	public	FALSE	TRUE	NHLBI	10154035	44001	PA-16-193	4R00HL143210-03	R00
NIAAA	9464332	3/30/18 0:00	PA-16-077	5K99AA024836-02	5	K99	AA	24836	2		CHIN HEMIN R	4/1/17 0:00	3/31/20 0:00	ZAA1-GG(02)M	9709636	10	PSYCHOLOGY	170230239	V6AFQPN18437	170230239	V6AFQPN18437	US	30.291188	-97.737568	578403	U_OF_TEXAS_AT_AUSTIN	AUSTIN	TX	SCHOOLS OF ARTS AND SCIENCES	787121139	UNITED STATES	N	43191	43921	273	Other Research-Related	7/10/05 0:00	2/22/19 0:00	NIAAA	153090	Public	FALSE	FALSE	NIAAA	10112545	43938	PA-16-077	4R00AA024836-03	R00
NIEHS	8725664	8/21/14 0:00	PA-11-197	5K99ES022221-02	5	K99	ES	22221	2		TYSON FREDERICK L	9/1/13 0:00	8/31/15 0:00	ZES1-JAB-J(K9)	10797261	12	PUBLIC HEALTH & PREV MEDICINE	73133571	GNJ7BBP73WE9	73133571	GNJ7BBP73WE9	US	42.275494	-83.743038	1506502	U_OF_MICHIGAN_AT_ANN_ARBOR	ANN ARBOR	MI	SCHOOLS OF PUBLIC HEALTH	481091276	UNITED STATES	N	41883	42247	113	Other Research-Related	7/6/05 0:00	5/29/46 0:00	NIEHS	90000	Public	FALSE	FALSE	NIEHS	9091753	42265	PA-11-197	4R00ES022221-03	R00
NIDA	8586520	11/29/13 0:00	PA-11-197	5K99DA033878-02	5	K99	DA	33878	2		SORENSEN ROGER	12/1/12 0:00	12/31/14 0:00	Career Development Education and Training Study Section[NIDA-K]	10885481	4	PHARMACOLOGY	105300446	MLQFL4JSSAA9	105300446	MLQFL4JSSAA9	US	37.549807	-77.452775	353201	VIRGINIA_COMMONWEALTH_U	RICHMOND	VA	SCHOOLS OF MEDICINE	232980568	UNITED STATES	N	41609	42004	279	Other Research-Related	7/6/05 0:00	9/8/01 0:00	NIDA	110190	Public	FALSE	FALSE	NIDA	8964511	42131	PA-11-197	4R00DA033878-03	R00
NCI	9087966	4/21/16 0:00	PA-15-083	1K99CA204628-01	1	K99	CA	204628	1		SCHMIDT MICHAEL K	4/21/16 0:00	2/17/17 0:00	Transition to Independence Study Section (I)[NCI-I]	10816926	30	OBSTETRICS & GYNECOLOGY	800771545	YZJ6DKPM4W63	800771545	YZJ6DKPM4W63	US	32.811963	-96.837534	578404	UT_SOUTHWESTERN_MED_CTR	DALLAS	TX	SCHOOLS OF MEDICINE	753909105	UNITED STATES	N	42481	42783	398	Other Research-Related	7/8/05 0:00	4/21/66 0:00	NCI	133791	Public	FALSE	FALSE	NCI	9405057	42783	PA-15-083	4R00CA204628-02	R00
NIGMS	8735166	8/29/14 0:00	PA-11-197	5K99GM097033-02	5	K99	GM	97033	2		FLICKER PAULA F	9/20/13 0:00	12/31/14 0:00	ZGM1-TRN-X(KR)	10291948	13	BIOCHEMISTRY	621889815	QHF5ZZ114M72	621889815	QHF5ZZ114M72	US	40.8415	-73.9414	1833205	COLUMBIA_U_HEALTH_SCI	NEW YORK	NY	SCHOOLS OF MEDICINE	100323725	UNITED STATES	N	41883	42004	859	Other Research-Related	7/6/05 0:00	2/18/82 0:00	NIGMS	30000	Private	TRUE	FALSE	NIGMS	8993954	42040	PA-11-197	4R00GM097033-03	R00
NINR	7688566	39981	PA-07-297	5K99NR010750-02	5	K99	NR	10750	2		HUSS KAREN	39709	40359	Nursing Science Review Committee[NRRC(40)]	8580660	12	NONE	73133571	GNJ7BBP73WE9	73133571	GNJ7BBP73WE9	US	42.275494	-83.743038	1506502	U_OF_MICHIGAN_AT_ANN_ARBOR	ANN ARBOR	MI	SCHOOLS OF NURSING	481091276	UNITED STATES	N	39995	40359	361	Other Research-Related	2009	89534	NINR	89534	Public	TRUE	TRUE	NINR	8071293	40361	PA-10-063	4R00NR010750-03	R00
NIAID	7222507	11/30/06 0:00	PA-06-133	1K99AI072834-01	1	K99	AI	72834	1		PETERS KENT	6/1/07 0:00	5/31/08 0:00	ZAI1-AWA-M(S1)	8627985	7	BIOCHEMISTRY	47006379	JDLVAVGYJQ21	47006379	JDLVAVGYJQ21	US	42.335672	-71.104237	3212902	HARVARD_MED_SCH	BOSTON	MA	SCHOOLS OF MEDICINE	21201616	UNITED STATES	N	39234	39599	855	Other Research-Related	6/29/05 0:00	8/18/12 0:00	NIAID	77663	Private	FALSE	FALSE	NIAID	7641627	39638	PA-06-133	4R00AI072834-02	R00
NIGMS	7223293	11/30/06 0:00	PA-06-133	1K99GM079922-01	1	K99	GM	79922	1		OKITA RICHARD T	12/1/06 0:00	7/19/07 0:00	ZGM1-BRT-9(KR)	8081064	48	CHEMISTRY	46705849	MJC5FCYQTPE6	46705849	MJC5FCYQTPE6	US	33.64852	-117.82136	577504	U_OF_CALIFORNIA-IRVINE	IRVINE	CA	SCHOOLS OF ARTS AND SCIENCES	926970001	UNITED STATES	N	39052	39282	859	Other Research-Related	6/29/05 0:00	5/29/46 0:00	NIGMS	90000	Public	TRUE	FALSE	NIGMS	7472524	39638	PA-07-297	5R00GM079922-03	R00
NCI	9087854	3/15/16 0:00	PA-15-083	1K99CA204602-01	1	K99	CA	204602	1		RADAEV SERGEY	4/1/16 0:00	3/31/17 0:00	Transition to Independence Study Section (I)[NCI-I]	8946136	12	PHARMACOLOGY	94878337	KMH5K9V7S518	94878337	KMH5K9V7S518	US	37.767442	-122.413937	577508	U_OF_CALIFORNIA_SAN_FRANCISCO	SAN FRANCISCO	CA	SCHOOLS OF MEDICINE	941432510	UNITED STATES	N	42461	42825	398	Other Research-Related	7/8/05 0:00	9/1/79 0:00	NCI	138672	public	FALSE	TRUE	NCI	9449854	42818	PA-15-083	4R00CA204602-02	R00
NIDCD	8678899	4/29/14 0:00	PA-11-197	5K99DC013305-02	5	K99	DC	13305	2		SULLIVAN SUSAN L	6/12/13 0:00	12/31/14 0:00	Communication Disorders Review Committee[CDRC]	8842712	5	MICROBIOLOGY/IMMUN/VIROLOGY	82359691	LN53LCFJFL45	82359691	LN53LCFJFL45	US	42.369697	-71.11193	3212901	HARVARD_U	CAMBRIDGE	MA	SCHOOLS OF ARTS AND SCIENCES	21385369	UNITED STATES	N	41791	42004	173	Other Research-Related	7/6/05 0:00	7/22/14 0:00	NIDCD	114890	Private	FALSE	FALSE	NIDCD	8966270	41991	PA-11-197	4R00DC013305-03	R00
NIBIB	8286932	6/14/12 0:00	PA-10-063	5K99EB013446-02	5	K99	EB	13446	2		ERIM ZEYNEP	7/1/11 0:00	8/31/13 0:00	ZEB1-OSR-D(J1)	10486393	13	MISCELLANEOUS	78576738	ENBLDJUN4N73	78576738	ENBLDJUN4N73	US	37.868252	-122.258486	577512	U_OF_CALIFORNIA_BERKELEY	BERKELEY	CA	ORGANIZED RESEARCH UNITS	947208118	UNITED STATES	N	41091	41517	286	Other Research-Related	7/4/05 0:00	5/4/25 0:00	NIBIB	82305	public	FALSE	FALSE	NIBIB	8719535	41514	PA-10-063	4R00EB013446-03	R00
NIA	9842385	43909	PA-18-398	5K99AG058801-02	5	K99	AG	58801	2		FULDNER REBECCA A	43466	44074	Biological Aging Study Section[NIA-B]	14938925	3	VETERINARY SCIENCES	43207562	FL6GV84CKN57	43207562	FL6GV84CKN57	US	41.310925	-72.926428	9420201	YALE_U	NEW HAVEN	CT	SCHOOLS OF MEDICINE	65208327	UNITED STATES	N	43922	44074	866	Other Research-Related	2020	101499	NIA	101499	Private	FALSE	FALSE	NIA	10116685	44088	PA-18-398	4R00AG058801-03	R00
NIAAA	8232056	3/2/12 0:00	PA-10-063	5K99AA020235-02	5	K99	AA	20235	2		MATOCHIK JOHN A	3/1/11 0:00	2/28/13 0:00	Neuroscience and Behavior Study Section[AA-4]	10324727	1	UnavaiLABle	63902704	KD5TGBT7AKC9	63902704	KD5TGBT7AKC9	US	41.852056	-71.398438	5369401	MIRIAM_HOSP	PROVIDENCE	RI	Independent Hospitals	29062853	UNITED STATES	N	40969	41333	273	Other Research-Related	7/4/05 0:00	12/7/18 0:00	NIAAA	153013	Private	FALSE	FALSE	NIAAA	8603965	41334	PA-10-063	4R00AA020235-03	R00
NCI	8867470	7/21/15 0:00	PA-14-042	1K99CA194077-01	1	K99	CA	194077	1		SCHMIDT MICHAEL K	7/21/15 0:00	4/30/16 0:00	Transition to Independence Study Section (I)[NCI-I]	10906652	12	BIOLOGY	71037113	LHGDNJMZ64Y1	71037113	LHGDNJMZ64Y1	US	40.763746	-73.955386	7056601	ROCKEFELLER_U	NEW YORK	NY	GRADUATE SCHOOLS	100656399	UNITED STATES	N	42206	42490	398	Other Research-Related	7/7/05 0:00	12/7/54 0:00	NCI	129638	Private	FALSE	FALSE	NCI	9222328	42434	PA-14-042	4R00CA194077-02	R00
NIDCR	7743790	11/18/09 0:00	PA-07-297	5K99DE018085-02	5	K99	DE	18085	2		FRIEDEN LESLIE A	1/1/09 0:00	12/31/10 0:00	ZDE1-RK(44)	8608310	18	NONE	4514360	MKAGLD59JRL1	4514360	MKAGLD59JRL1	US	40.440909	-79.959125	2059802	U_OF_PITTSBURGH_AT_PITTSBURGH	PITTSBURGH	PA	SCHOOLS OF DENTISTRY/ORAL HYGN	152133320	UNITED STATES	N	40179	40543	121	Other Research-Related	7/2/05 0:00	10/30/59 0:00	NIDCR	131426	Public	TRUE	TRUE	NIDCR	8206325	40549	PA-10-063	4R00DE018085-03	R00
NIDA	9258419	5/3/17 0:00	PA-15-083	5K99DA039253-02	5	K99	DA	39253	2		LIN YU	5/1/16 0:00	4/30/18 0:00	ZDA1-HXO-H(01)S	9169111	7	PHYSIOLOGY	5436803	KG76WYENL5K1	5436803	KG76WYENL5K1	US	42.050479	-87.680046	6144650	NORTHWESTERN_U	CHICAGO	IL	SCHOOLS OF MEDICINE	606114579	UNITED STATES	N	42856	43220	279	Other Research-Related	7/9/05 0:00	12/8/74 0:00	NIDA	136944	Private	FALSE	FALSE	NIDA	9657860	43294	PA-15-083	4R00DA039253-03	R00
NICHD	7907687	7/16/10 0:00	PA-07-297	5K99HD061752-02	5	K99	HD	61752	2		BURES REGINA M	8/15/09 0:00	7/31/11 0:00	Health Behavior and Context Study Section[CHHD-M]	9646236	4	MISCELLANEOUS	44387793	TP7EK8DZV6N5	44387793	TP7EK8DZV6N5	US	36.007766	-78.926475	2221101	DUKE_U	DURHAM	NC	SCHOOLS OF ARTS AND SCIENCES	277054673	UNITED STATES	N	40391	40755	865	Other Research-Related	7/2/05 0:00	10/5/69 0:00	NICHD	62006	Private	TRUE	FALSE	NICHD	8235233	40668	PA-10-063	4R00HD061752-03	R00
NIEHS	9439806	2/8/18 0:00	PA-16-077	5K99ES026198-02	5	K99	ES	26198	2		BOYLES ABEE	3/1/17 0:00	2/14/19 0:00	ZES1-LWJ-J(KS)	10926177	12	PUBLIC HEALTH & PREV MEDICINE	73133571	GNJ7BBP73WE9	73133571	GNJ7BBP73WE9	US	42.275494	-83.743038	1506502	U_OF_MICHIGAN_AT_ANN_ARBOR	ANN ARBOR	MI	SCHOOLS OF PUBLIC HEALTH	481091276	UNITED STATES	N	43160	43510	113	Other Research-Related	7/10/05 0:00	1/23/96 0:00	NIEHS	108136	Public	FALSE	TRUE	NIEHS	9828805	43501	PA-16-077	4R00ES026198-03	R00
NIGMS	9978843	6/25/20 0:00	PA-18-398	5K99GM134153-02	5	K99	GM	134153	2		SESMA MICHAEL A	7/16/19 0:00	2/28/21 0:00	ZGM1-TWD-8(KR)	12510292	7	BIOLOGY	1425594	E2NYLCDML6V1	1425594	E2NYLCDML6V1	US	42.359128	-71.093339	4911501	MASSACHUSETTS_INST_OF_TECH	CAMBRIDGE	MA	SCHOOLS OF ARTS AND SCIENCES	21421029	UNITED STATES	N	44013	44255	859	Other Research-Related	7/12/05 0:00	10/13/73 0:00	NIGMS	99999	Private	FALSE	FALSE	NIGMS	10359857	##########	PA-18-398	4R00GM134153-03	R00
NIA	8990511	12/2/15 0:00	PA-14-042	5K99AG049126-02	5	K99	AG	49126	2		GUO MAX	1/1/15 0:00	7/31/17 0:00	Biological Aging Study Section[NIA-B]	10392575	18	UnavaiLABle	148230662	MGUCX773RNJ8	148230662	MGUCX773RNJ8	US	26.885174	-80.11392	10005569	SCRIPPS_FLORIDA	JUPITER	FL	Research Institutes	334585284	UNITED STATES	N	42370	42947	866	Other Research-Related	7/8/05 0:00	3/17/77 0:00	NIA	101250	Private	FALSE	FALSE	NIA	9568855	43001	PA-14-042	4R00AG049126-03	R00
NIEHS	8813573	4/1/15 0:00	PA-11-197	5K99ES023498-02	5	K99	ES	23498	2		SCHUG THADDEUS	3/1/14 0:00	4/30/16 0:00	ZES1-LWJ-D(K9)	9437907	7	PUBLIC HEALTH & PREV MEDICINE	605799469	HD1WMN6945W6	605799469	HD1WMN6945W6	US	47.660307	-122.315168	9087701	U_OF_WASHINGTON	SEATTLE	WA	SCHOOLS OF PUBLIC HEALTH	981959472	UNITED STATES	N	42064	42490	113	Other Research-Related	7/7/05 0:00	4/2/32 0:00	NIEHS	121354	Public	TRUE	TRUE	NIEHS	9206264	42487	PA-11-197	4R00ES023498-03	R00
NHLBI	7796784	3/15/10 0:00	PA-07-297	5K99HL094767-02	5	K99	HL	94767	2		PAPANICOLAOU GEORGE	4/1/09 0:00	8/7/11 0:00	ZHL1-CSR-Z(O1)	8468286	18	INTERNAL MEDICINE/MEDICINE	4514360	MKAGLD59JRL1	4514360	MKAGLD59JRL1	US	40.440909	-79.959125	2059802	U_OF_PITTSBURGH_AT_PITTSBURGH	PITTSBURGH	PA	SCHOOLS OF MEDICINE	152133320	UNITED STATES	N	40269	40762	837	Other Research-Related	7/2/05 0:00	10/25/31 0:00	NHLBI	84670	Public	TRUE	TRUE	NHLBI	8289715	40753	PA-10-063	4R00HL094767-03	R00
NIMH	7563213	1/16/09 0:00	PA-07-297	5K99MH082104-02	5	K99	MH	82104	2		SESMA MICHAEL A	2/5/08 0:00	1/31/10 0:00	ZMH1-ERB-H(09)	8920899	33	NONE	92530369	RN64EPNH8JC6	92530369	RN64EPNH8JC6	US	34.070199	-118.45102	577505	U_OF_CALIFORNIA_LOS_ANGELES	LOS ANGELES	CA	SCHOOLS OF MEDICINE	900952000	UNITED STATES	N	39845	40209	242	Other Research-Related	7/1/05 0:00	5/29/46 0:00	NIMH	90000	Public	TRUE	TRUE	NIMH	8125759	40424		4R00MH082104-03	R00
NIAID	7772948	4/29/10 0:00	PA-09-036	1K99AI085107-01	1	K99	AI	85107	1		MCGUGAN GLEN C	5/1/10 0:00	1/2/11 0:00	Microbiology and Infectious Diseases B Research Study Section[MID-B]	6439809	27	NONE	9584210	U2JMKHNS5TG4	9584210	U2JMKHNS5TG4	US	34.134332	-118.12652	1073501	CALIFORNIA_INST_OF_TECH	PASADENA	CA	SCHOOLS OF ARTS AND SCIENCES	911250001	UNITED STATES	N	40299	40545	855	Other Research-Related	7/2/05 0:00	4/3/63 0:00	NIAID	59629	Private	FALSE	FALSE	NIAID	8203927	40557	PA-10-063	4R00AI085107-02	R00
NICHD	7620867	4/4/09 0:00	PA-07-297	5K99HD058070-02	5	K99	HD	58070	2		TASCA RICHARD J	5/7/08 0:00	3/31/10 0:00	Developmental Biology Study Section[CHHD-C]	7795997	18	BIOLOGY	9214214	HJD6G4D6TJY5	9214214	HJD6G4D6TJY5	US	37.426852	-122.17047	8046501	STANFORD_U	STANFORD	CA	SCHOOLS OF ARTS AND SCIENCES	943052004	UNITED STATES	N	39904	40268	865	Other Research-Related	7/1/05 0:00	5/29/46 0:00	NICHD	90000	Private	FALSE	FALSE	NICHD	7810286	40067	PA-09-036	4R00HD058070-03	R00
NHLBI	7770784	2/22/10 0:00	PA-07-297	5K99HL094536-02	5	K99	HL	94536	2		COMMARATO MICHAEL	2/18/09 0:00	8/1/10 0:00	ZHL1-CSR-Z(O1)	7823835	2	BIOCHEMISTRY	57123192	QD4MGHFDJKU1	57123192	QD4MGHFDJKU1	US	39.980272	-75.157051	8240301	TEMPLE_U_OF_THE_COMMONWEALTH	PHILADELPHIA	PA	SCHOOLS OF MEDICINE	191226003	UNITED STATES	N	40210	40391	837	Other Research-Related	7/2/05 0:00	5/29/46 0:00	NHLBI	90000	Private	FALSE	FALSE	NHLBI	8060040	40386		4R00HL094536-03	R00
NICHD	8705560	5/15/14 0:00	PA-11-197	5K99HD076679-02	5	K99	HD	76679	2		RUSSO DENISE	8/1/13 0:00	5/31/15 0:00	AIDS Clinical Studies and Epidemiology Study Section[ACE]	10440440	7	PUBLIC HEALTH & PREV MEDICINE	605799469	HD1WMN6945W6	605799469	HD1WMN6945W6	US	47.660307	-122.315168	9087701	U_OF_WASHINGTON	SEATTLE	WA	SCHOOLS OF MEDICINE	981959472	UNITED STATES	N	41791	42155	865	Other Research-Related	7/6/05 0:00	12/26/84 0:00	NICHD	104091	Public	FALSE	TRUE	NICHD	9044050	42186	PA-11-197	4R00HD076679-03	R00
NHLBI	7660594	4/9/09 0:00	PA-07-297	1K99HL093064-01A1	1	K99	HL	93064	1	A	ROTHGEB ANN E	4/1/09 0:00	3/31/10 0:00	ZHL1-CSR-Z(F2)	7891882	52	INTERNAL MEDICINE/MEDICINE	804355790	UYTTZT6G9DT1	804355790	UYTTZT6G9DT1	US	32.876991	-117.24087	577507	U_OF_CALIFORNIA_SAN_DIEGO	LA JOLLA	CA	SCHOOLS OF MEDICINE	920930621	UNITED STATES	N	39904	40268	837	Other Research-Related	7/1/05 0:00	5/30/68 0:00	NHLBI	98037	public	TRUE	TRUE	NHLBI	8076427	40359	PA-07-297	4R00HL093064-02	R00
NIDA	7458904	6/20/08 0:00	PA-06-133	5K99DA023548-02	5	K99	DA	23548	2		BISWAS JAMIE	7/1/07 0:00	6/30/09 0:00	ZDA1-GXM-A(19)	8787740	9	PSYCHIATRY	800771594	ZUFBNVZ587D4	800771594	ZUFBNVZ587D4	US	29.703025	-95.403303	578417	U_OF_TEXAS_HLTH_SCI_CTR_HOUSTON	HOUSTON	TX	SCHOOLS OF MEDICINE	770305400	UNITED STATES	N	39630	39994	279	Other Research-Related	6/30/05 0:00	7/19/99 0:00	NIDA	72885	Public	TRUE	FALSE	NIDA	7758094	39891	PA-07-297	4R00DA023548-03	R00
NIAAA	9320150	11/30/16 0:00	PA-16-285	7K99AA023002-03	7	K99	AA	23002	3		LIU QI-YING	8/15/15 0:00	7/31/17 0:00	Neuroscience and Behavior Study Section[AA-4]	8796432	4	UnavaiLABle	608195277	D3LHU66KBLD5	608195277	D3LHU66KBLD5	US	35.9316	-79.057377	578206	U_OF_NORTH_CAROLINA_CHAPEL_HILL	CHAPEL HILL	NC	Domestic Higher Education	275995023	UNITED STATES	N	42614	42947	273	Other Research-Related	7/8/05 0:00	2/4/88 0:00	NIAAA	141750	Public	TRUE	TRUE	NIAAA	9543007	42962	PA-16-285	4R00AA023002-04	R00
NIDDK	8142096	8/29/11 0:00	PA-09-036	5K99DK087922-02	5	K99	DK	87922	2		RANKIN TRACY L	9/15/10 0:00	7/31/12 0:00	ZDK1-GRB-G(J2)M	9932125	18	PEDIATRICS	4514360	MKAGLD59JRL1	4514360	MKAGLD59JRL1	US	40.440909	-79.959125	2059802	U_OF_PITTSBURGH_AT_PITTSBURGH	PITTSBURGH	PA	SCHOOLS OF MEDICINE	152133320	UNITED STATES	N	40756	41121	847	Other Research-Related	7/3/05 0:00	5/29/46 0:00	NIDDK	90000	Public	TRUE	TRUE	NIDDK	8441046	41136	PA-10-063	4R00DK087922-03	R00
NIDCR	7317323	6/27/07 0:00	PA-06-133	1K99DE018212-01A1	1	K99	DE	18212	1	A	DRUMMOND JAMES	7/1/07 0:00	6/30/08 0:00	NIDCR Special Grants Review Committee[DSR]	7357821	12	DENTISTRY	94878337	KMH5K9V7S518	94878337	KMH5K9V7S518	US	37.767442	-122.413937	577508	U_OF_CALIFORNIA_SAN_FRANCISCO	SAN FRANCISCO	CA	SCHOOLS OF DENTISTRY/ORAL HYGN	941432510	UNITED STATES	N	39264	39629	121	Other Research-Related	6/29/05 0:00	5/29/46 0:00	NIDCR	90000	public	TRUE	TRUE	NIDCR	7639786	39629	PA-07-297	4R00DE018212-02	R00
NIDDK	7455821	6/12/08 0:00	PA-06-133	5K99DK077441-02	5	K99	DK	77441	2		HAFT CAROL R	7/1/07 0:00	6/30/09 0:00	Diabetes Endocrinology and Metabolic Diseases B Study Section[DDK-B]	8630335	12	INTERNAL MEDICINE/MEDICINE	73133571	GNJ7BBP73WE9	73133571	GNJ7BBP73WE9	US	42.275494	-83.743038	1506502	U_OF_MICHIGAN_AT_ANN_ARBOR	ANN ARBOR	MI	SCHOOLS OF MEDICINE	481091276	UNITED STATES	N	39630	39994	847	Other Research-Related	6/30/05 0:00	5/29/46 0:00	NIDDK	90000	Public	TRUE	TRUE	NIDDK	7771329	39968	PA-07-297	4R00DK077441-03	R00
NCI	8748088	9/9/14 0:00	PA-11-197	1K99CA187035-01	1	K99	CA	187035	1		SCHMIDT MICHAEL K	9/9/14 0:00	8/31/15 0:00	Transition to Independence Study Section (I)[NCI-I]	10575019	1	UnavaiLABle	6471700	Y2K4F9RPRRG7	6471700	Y2K4F9RPRRG7	US	44.02432	-92.46011	4976101	MAYO_CLINIC_ROCHESTER	ROCHESTER	MN	Other Domestic Non-Profits	559050001	UNITED STATES	N	41891	42247	398	Other Research-Related	7/6/05 0:00	5/27/69 0:00	NCI	134923	Private	FALSE	FALSE	NCI	9133051	42257	PA-11-197	4R00CA187035-02	R00
NIMH	10405664	6/7/21	PA-18-398	3K99MH119312-02S1	3	K99	MH	119312	2	S	DRISCOLL JAMIE	4/5/19	10/31/21	ZMH1-ERB-M(01)	11433342	49	UnavaiLABle	78731668	NNJ6BMBTFGN5	78731668	NNJ6BMBTFGN5	US	32.8863	-117.243929	7210001	SALK_INST_FOR_BIOLOGICAL_STUDIES	La Jolla	CA	Research Institutes	920371002	UNITED STATES	N	4/1/20	10/31/21	242	Other Research-Related	7/13/05 0:00	3/14/80 0:00	NIMH	29294	Private	FALSE	FALSE	NIMH	10680669	9/14/22	PA-18-398	4R00MH119312-03	R00
NHLBI	8249060	3/30/12 0:00	PA-10-063	5K99HL103722-02	5	K99	HL	103722	2		CARLSON DREW E	4/1/11 0:00	9/30/13 0:00	ZHL1-CSR-Z(F2)	10211211	3	ANATOMY/CELL BIOLOGY	47120084	TX2DAGQPENZ5	47120084	TX2DAGQPENZ5	US	38.543366	-121.72946	577503	U_OF_CALIFORNIA_AT_DAVIS	DAVIS	CA	SCHOOLS OF MEDICINE	956186153	UNITED STATES	N	41000	41547	837	Other Research-Related	7/4/05 0:00	4/22/65 0:00	NHLBI	96903	Public	FALSE	FALSE	NHLBI	8672957	41502	PA-10-063	4R00HL103722-03	R00
NICHD	9719866	4/24/19 0:00	PA-16-193	5K99HD091452-02	5	K99	HD	91452	2		ILEKIS JOHN V	6/15/18 0:00	5/31/20 0:00	ZHD1-DSR-G(02)	14517369	52	PATHOLOGY	804355790	UYTTZT6G9DT1	804355790	UYTTZT6G9DT1	US	32.876991	-117.24087	577507	U_OF_CALIFORNIA_SAN_DIEGO	LA JOLLA	CA	SCHOOLS OF MEDICINE	920930621	UNITED STATES	N	43617	43982	865	Other Research-Related	7/11/05 0:00	8/12/83 0:00	NICHD	103589	public	FALSE	TRUE	NICHD	10140719	43956	PA-16-193	4R00HD091452-03	R00
NIGMS	7742196	11/27/09 0:00	PA-07-297	5K99GM086471-02	5	K99	GM	86471	2		FLICKER PAULA F	12/1/08 0:00	6/30/11 0:00	ZGM1-BRT-9(KR)	8605704	2	UnavaiLABle	603847393	MQE2JHHJW9Q8	603847393	MQE2JHHJW9Q8	US	42.2802	-71.758245	850903	U_OF_MASSACHUSETTS_MED_SCH_WORCESTER	WORCESTER	MA	Domestic Higher Education	16550002	UNITED STATES	N	40148	40724	859	Other Research-Related	7/2/05 0:00	3/20/44 0:00	NIGMS	89200	Public	FALSE	FALSE	NIGMS	8308082	40784	PA-11-197	4R00GM086471-03	R00
NIDCR	9230386	6/9/17 0:00	PA-15-083	5K99DE025874-02	5	K99	DE	25874	2		FRIEDEN LESLIE A	7/1/16 0:00	3/31/19 0:00	ZDE1-VH(11)	11284957	12	DENTISTRY	94878337	KMH5K9V7S518	94878337	KMH5K9V7S518	US	37.767442	-122.413937	577508	U_OF_CALIFORNIA_SAN_FRANCISCO	SAN FRANCISCO	CA	SCHOOLS OF DENTISTRY/ORAL HYGN	941432510	UNITED STATES	N	42917	43555	121	Other Research-Related	7/9/05 0:00	9/12/46 0:00	NIDCR	126630	public	TRUE	FALSE	NIDCR	9879856	43556	PA-15-083	4R00DE025874-03	R00
NHLBI	8523967	7/12/13 0:00	PA-11-197	5K99HL114738-02	5	K99	HL	114738	2		SCOTT JANE	8/15/12 0:00	12/10/13 0:00	ZHL1-CSR-P(M3)	10806028	30	BIOCHEMISTRY	800771545	YZJ6DKPM4W63	800771545	YZJ6DKPM4W63	US	32.811963	-96.837534	578404	UT_SOUTHWESTERN_MED_CTR	DALLAS	TX	SCHOOLS OF MEDICINE	753909105	UNITED STATES	N	41456	41618	837	Other Research-Related	7/5/05 0:00	1/5/41 0:00	NHLBI	124554	Public	FALSE	FALSE	NHLBI	8786696	41699	PA-11-197	4R00HL114738-03	R00
NIDA	8265846	3/26/12 0:00	PA-10-063	5K99DA029565-02	5	K99	DA	29565	2		LIN YU	4/1/11 0:00	6/30/12 0:00	Career Development Education and Training Study Section[NIDA-K]	8914723	5	VETERINARY SCIENCES	41485301	XRJSGX384TD6	41485301	XRJSGX384TD6	US	46.728892	-117.155742	9082001	WASHINGTON_STATE_U	PULLMAN	WA	SCHOOLS OF VETERINARY MEDICINE	991641060	UNITED STATES	N	41000	41090	279	Other Research-Related	7/4/05 0:00	8/28/33 0:00	NIDA	121867	Public	FALSE	FALSE	NIDA	8458391	41081	PA-11-197	4R00DA029565-03	R00
NHLBI	8353669	8/17/12 0:00	PA-11-197	1K99HL114862-01	1	K99	HL	114862	1		TIGNO XENIA	8/20/12 0:00	10/31/13 0:00	ZHL1-CSR-P(M3)	11094381	27	NONE	9584210	U2JMKHNS5TG4	9584210	U2JMKHNS5TG4	US	34.134332	-118.12652	1073501	CALIFORNIA_INST_OF_TECH	PASADENA	CA	SCHOOLS OF ARTS AND SCIENCES	911250001	UNITED STATES	N	41141	41578	837	Other Research-Related	7/4/05 0:00	9/6/44 0:00	NHLBI	89370	Private	FALSE	FALSE	NHLBI	8699293	41501	PA-11-197	4R00HL114862-02	R00
NIDCR	10400365	6/23/21	PA-20-272	3K99DE028592-02S1	3	K99	DE	28592	2	S	BROWN ANISSA F	7/1/21	6/30/22		8843793	27	NONE	9584210	U2JMKHNS5TG4	9584210	U2JMKHNS5TG4	US	34.134332	-118.12652	1073501	CALIFORNIA_INST_OF_TECH	PASADENA	CA	SCHOOLS OF ARTS AND SCIENCES	911250001	UNITED STATES	N	7/1/21	6/30/22	121	Other Research-Related	7/13/05 0:00	6/3/34 0:00	NIDCR	85622	Private	FALSE	FALSE	NIDCR	10632334	6/23/22	PA-18-398	4R00DE028592-03	R00
NIDCD	9463646	3/29/18 0:00	PA-16-193	5K99DC015543-02	5	K99	DC	15543	2		RIVERA-RENTAS ALBERTO L	4/1/17 0:00	9/30/19 0:00	Communication Disorders Review Committee[CDRC]	8786874	12	OTOLARYNGOLOGY	121911077	M5SZJ6VHUHN8	121911077	M5SZJ6VHUHN8	US	40.669895	-73.974354	5998304	NEW_YORK_U_SCH_OF_MED	NEW YORK	NY	SCHOOLS OF MEDICINE	10016	UNITED STATES	N	43191	43738	173	Other Research-Related	7/10/05 0:00	5/5/53 0:00	NIDCD	92533	Private	TRUE	FALSE	NIDCD	10118560	44014	PA-16-193	4R00DC015543-03	R00
NHLBI	8831730	2/9/15 0:00	PA-11-197	5K99HL122508-02	5	K99	HL	122508	2		CARLSON DREW E	4/4/14 0:00	1/31/17 0:00	ZHL1-CSR-P(F1)	10467763	12	PSYCHIATRY	94878337	KMH5K9V7S518	94878337	KMH5K9V7S518	US	37.767442	-122.413937	577508	U_OF_CALIFORNIA_SAN_FRANCISCO	SAN FRANCISCO	CA	SCHOOLS OF MEDICINE	941432510	UNITED STATES	N	42064	42766	837	Other Research-Related	7/7/05 0:00	10/7/67 0:00	NHLBI	134325	public	FALSE	TRUE	NHLBI	9405942	42742	PA-11-197	4R00HL122508-03	R00
NIDCR	8300822	5/24/12 0:00	PAR-09-256	5K99DE022059-02	5	K99	DE	22059	2		FRIEDEN LESLIE A	7/13/11 0:00	8/19/13 0:00	NIDCR Special Grants Review Committee[DSR]	10477194	12	DENTISTRY	94878337	KMH5K9V7S518	94878337	KMH5K9V7S518	US	37.767442	-122.413937	577508	U_OF_CALIFORNIA_SAN_FRANCISCO	SAN FRANCISCO	CA	SCHOOLS OF DENTISTRY/ORAL HYGN	941432510	UNITED STATES	N	41091	41505	121	Other Research-Related	7/4/05 0:00	11/30/48 0:00	NIDCR	127440	public	TRUE	TRUE	NIDCR	8710638	41505	PAR-09-256	4R00DE022059-03	R00
NLM	8145599	8/25/11 0:00	PA-09-036	5K99LM010822-02	5	K99	LM	10822	2		YE JANE	9/30/10 0:00	2/29/12 0:00	ZLM1-ZH-C(M3)	9718912	18	MISCELLANEOUS	4514360	MKAGLD59JRL1	4514360	MKAGLD59JRL1	US	40.440909	-79.959125	2059802	U_OF_PITTSBURGH_AT_PITTSBURGH	PITTSBURGH	PA	SCHOOLS OF MEDICINE	152133320	UNITED STATES	N	40816	40968	879	Other Research-Related	7/3/05 0:00	5/29/46 0:00	NLM	90000	Public	TRUE	TRUE	NLM	8372706	40974		4R00LM010822-03	R00
NLM	8354440	8/17/12 0:00	PA-11-197	1K99LM011392-01	1	K99	LM	11392	1		SIM HUA-CHUAN	9/1/12 0:00	8/31/13 0:00	Biomedical Informatics Library and Data Sciences Review Committee[BLR]	10960996	52	INTERNAL MEDICINE/MEDICINE	804355790	UYTTZT6G9DT1	804355790	UYTTZT6G9DT1	US	32.876991	-117.24087	577507	U_OF_CALIFORNIA_SAN_DIEGO	LA JOLLA	CA	SCHOOLS OF MEDICINE	920930621	UNITED STATES	N	41153	41517	879	Other Research-Related	7/4/05 0:00	9/26/06 0:00	NLM	75510	public	TRUE	TRUE	NLM	8589939	41505	PA-11-197	4R00LM011392-02	R00
NIAAA	10177823	5/31/21	PA-19-130	5K99AA027806-02	5	K99	AA	27806	2		CUI CHANGHAI	6/2/20	8/31/21	Neuroscience and Behavior Study Section[AA-4]	12313290	5	PHARMACOLOGY	965717143	GTNBNWXJ12D5	965717143	DWH7MSXKA2A8; GTNBNWXJ12D5	US	36.143381	-86.803365	8721001	VANDERBILT_U	Nashville	TN	SCHOOLS OF MEDICINE	372032408	UNITED STATES	N	6/1/21	8/31/21	273	Other Research-Related	7/13/05 0:00	4/12/78 0:00	NIAAA	138165	Private	FALSE	FALSE	NIAAA	10455279	44448	PA-19-130	4R00AA027806-03	R00
NHLBI	8785699	11/25/14 0:00	PA-11-197	5K99HL117048-02	5	K99	HL	117048	2		CARLSON DREW E	12/12/13 0:00	6/30/15 0:00	ZHL1-CSR-P(O1)	11288941	18	RADIATION-DIAGNOSTIC/ONCOLOGY	9214214	HJD6G4D6TJY5	9214214	HJD6G4D6TJY5	US	37.426852	-122.17047	8046501	STANFORD_U	STANFORD	CA	SCHOOLS OF MEDICINE	943052004	UNITED STATES	N	41974	42185	837	Other Research-Related	7/7/05 0:00	2/21/62 0:00	NHLBI	132271	Private	FALSE	FALSE	NHLBI	9058660	42173	PA-11-197	4R00HL117048-03	R00
NHLBI	9463521	3/7/18 0:00	PA-16-193	5K99HL133482-02	5	K99	HL	133482	2		HUANG LI-SHIN	4/1/17 0:00	8/31/18 0:00	NHLBI Mentored Transition to Independence Study Section[MTI(JA)]	11640426	2	NEUROSCIENCES	161202122	LCLSJAGTNZQ7	161202122	LCLSJAGTNZQ7	US	43.068519	-89.400858	578503	U_OF_WISCONSIN-MADISON	MADISON	WI	SCHOOLS OF MEDICINE	537151218	UNITED STATES	N	43191	43343	837	Other Research-Related	7/10/05 0:00	12/8/69 0:00	NHLBI	98594	public	FALSE	FALSE	NHLBI	9733506	43314	PA-16-193	4R00HL133482-03	R00
NIMH	9964922	6/16/20 0:00	PA-18-398	5K99MH118422-02	5	K99	MH	118422	2		VAN'T VEER ASHLEE V	7/1/19 0:00	8/31/20 0:00	ZMH1-ERB-M(03)	14530184	7	ANESTHESIOLOGY	605799469	HD1WMN6945W6	605799469	HD1WMN6945W6	US	47.660307	-122.315168	9087701	U_OF_WASHINGTON	SEATTLE	WA	SCHOOLS OF MEDICINE	981959472	UNITED STATES	N	44013	44074	242	Other Research-Related	7/12/05 0:00	3/1/54 0:00	NIMH	19784	Public	FALSE	FALSE	NIMH	10212529	44071	PA-18-398	4R00MH118422-03	R00
NIDDK	8053813	3/23/11 0:00	PA-09-036	5K99DK087853-02	5	K99	DK	87853	2		HAFT CAROL R	4/1/10 0:00	4/30/11 0:00	Diabetes Endocrinology and Metabolic Diseases B Study Section[DDK-B]	9973422	7	UnavaiLABle	76580745	DPMGH9MG1X67	76580745	DPMGH9MG1X67	US	42.337593	-71.108279	1464901	DANA-FARBER_CANCER_INST	BOSTON	MA	Independent Hospitals	22155450	UNITED STATES	N	40634	40663	847	Other Research-Related	7/3/05 0:00	3/15/23 0:00	NIDDK	45000	Private	FALSE	FALSE	NIDDK	8235443	40659	PA-09-036	4R00DK087853-03	R00
NICHD	7405377	4/16/08 0:00	PA-06-133	5K99HD055333-02	5	K99	HD	55333	2		OSTER-GRANITE MARY LOU	4/12/07 0:00	7/31/09 0:00	Developmental Biology Study Section[CHHD-C]	7258471	4	GENETICS	608195277	D3LHU66KBLD5	608195277	D3LHU66KBLD5	US	35.9316	-79.057377	578206	U_OF_NORTH_CAROLINA_CHAPEL_HILL	CHAPEL HILL	NC	SCHOOLS OF MEDICINE	275995023	UNITED STATES	N	39539	40025	865	Other Research-Related	6/30/05 0:00	10/12/24 0:00	NICHD	82101	Public	TRUE	FALSE	NICHD	7924264	40086	PA-06-133	4R00HD055333-03	R00
NCI	8791254	7/30/14 0:00	PA-11-197	1K99CA181494-01A1	1	K99	CA	181494	1	A	SCHMIDT MICHAEL K	8/1/14 0:00	7/31/15 0:00	Transition to Independence Study Section (I)[NCI-I]	10913771	12	PHARMACOLOGY	94878337	KMH5K9V7S518	94878337	KMH5K9V7S518	US	37.767442	-122.413937	577508	U_OF_CALIFORNIA_SAN_FRANCISCO	SAN FRANCISCO	CA	SCHOOLS OF MEDICINE	941432510	UNITED STATES	N	41852	42216	398	Other Research-Related	7/6/05 0:00	9/1/79 0:00	NCI	138672	public	FALSE	TRUE	NCI	9096934	42214	PA-11-197	4R00CA181494-02	R00
NIAAA	7511916	7/25/08 0:00	PA-07-297	1K99AA017668-01	1	K99	AA	17668	1		TWOMBLY DENNIS A	8/1/08 0:00	6/30/09 0:00	ZAA1-CC(12)	7551787	5	PHYSIOLOGY	965717143	GTNBNWXJ12D5	965717143	DWH7MSXKA2A8; GTNBNWXJ12D5	US	36.143381	-86.803365	8721001	VANDERBILT_U	Nashville	TN	SCHOOLS OF MEDICINE	372032408	UNITED STATES	N	39661	39994	273	Other Research-Related	6/30/05 0:00	10/7/31 0:00	NIAAA	121176	Private	FALSE	FALSE	NIAAA	7893285	40071	PA-07-297	4R00AA017668-02	R00
NICHD	7488302	7/29/08 0:00	PA-06-133	5K99HD056157-02	5	K99	HD	56157	2		LAMAR CHARISEE A	9/1/07 0:00	1/1/09 0:00	Reproduction Andrology and Gynecology Study Section[CHHD-R]	7313921	7	PHYSIOLOGY	605799469	HD1WMN6945W6	605799469	HD1WMN6945W6	US	47.660307	-122.315168	9087701	U_OF_WASHINGTON	SEATTLE	WA	SCHOOLS OF MEDICINE	981959472	UNITED STATES	N	39692	39814	865	Other Research-Related	6/30/05 0:00	4/3/07 0:00	NICHD	39175	Public	FALSE	FALSE	NICHD	7754787	39833	PA-07-297	4R00HD056157-03	R00
NIAID	7988661	5/26/10 0:00	PA-09-036	1K99AI085035-01A1	1	K99	AI	85035	1	A	WALI TONU M	6/1/10 0:00	5/31/11 0:00	Microbiology and Infectious Diseases Advisory Committee[MID]	2199705	12	BIOCHEMISTRY	94878337	KMH5K9V7S518	94878337	KMH5K9V7S518	US	37.767442	-122.413937	577508	U_OF_CALIFORNIA_SAN_FRANCISCO	SAN FRANCISCO	CA	SCHOOLS OF MEDICINE	941432510	UNITED STATES	N	40330	40694	855	Other Research-Related	7/2/05 0:00	10/19/39 0:00	NIAID	87586	public	FALSE	TRUE	NIAID	8284614	40758		4R00AI085035-02	R00
NCI	8296481	41064	PA-10-063	5K99CA160639-02	5	K99	CA	160639	2		SCHMIDT MICHAEL K	40729	41333	Institutional Training and Education Study Section (F)[NCI-F]	6410374	2	RADIATION-DIAGNOSTIC/ONCOLOGY	161202122	LCLSJAGTNZQ7	161202122	LCLSJAGTNZQ7	US	43.068519	-89.400858	578503	U_OF_WISCONSIN-MADISON	MADISON	WI	SCHOOLS OF MEDICINE	537151218	UNITED STATES	N	41091	41333	398	Other Research-Related	2012	149040	NCI	149040	public	TRUE	TRUE	NCI	8604213	41334	PA-10-063	4R00CA160639-03	R00
NHLBI	9107909	6/23/16 0:00	PA-14-042	5K99HL129168-02	5	K99	HL	129168	2		WANG WAYNE C	7/15/15 0:00	6/30/17 0:00	NHLBI Mentored Transition to Independence Study Section[MTI(MA)]	11196002	8	UnavaiLABle	73130411	FLJ7DQKLL226	73130411	FLJ7DQKLL226	US	42.363198	-71.068772	4907701	MASSACHUSETTS_GENERAL_HOSP	BOSTON	MA	Independent Hospitals	21142621	UNITED STATES	N	42552	42916	837	Other Research-Related	7/8/05 0:00	5/31/74 0:00	NHLBI	173277	Private	FALSE	FALSE	NHLBI	9483801	42968	PA-14-042	4R00HL129168-03	R00
NIAID	9524671	6/19/18 0:00	PA-16-077	5K99AI123498-02	5	K99	AI	123498	2		BRADFORD MARY KATHERINE	7/14/17 0:00	9/30/19 0:00	Microbiology and Infectious Diseases B Research Study Section[MID-B]	11792638	49	UnavaiLABle	781613492	PHZJFZ32NKH4	781613492	PHZJFZ32NKH4	US	32.903062	-117.243592	7375802	SCRIPPS_RES_INST_THE	LA JOLLA	CA	Other Domestic Non-Profits	920371000	UNITED STATES	N	43282	43738	855	Other Research-Related	7/10/05 0:00	4/23/83 0:00	NIAID	103478	Private	FALSE	FALSE	NIAID	10140002	43972	PA-18-935	3R00AI123498-03S1	R00
NIDDK	7799749	3/29/10 0:00	PA-07-297	5K99DK083531-02	5	K99	DK	83531	2		BLONDEL OLIVIER	4/5/09 0:00	3/31/12 0:00	Diabetes Endocrinology and Metabolic Diseases B Study Section[DDK-B]	9509864	12	GENETICS	71037113	LHGDNJMZ64Y1	71037113	LHGDNJMZ64Y1	US	40.763746	-73.955386	7056601	ROCKEFELLER_U	NEW YORK	NY	GRADUATE SCHOOLS	100656399	UNITED STATES	N	40269	40999	847	Other Research-Related	7/2/05 0:00	5/29/46 0:00	NIDDK	90000	Private	FALSE	FALSE	NIDDK	8512905	41152	PA-11-197	4R00DK083531-03	R00
NINR	9673231	3/22/19 0:00	PA-16-193	5K99NR017651-02	5	K99	NR	17651	2		HAMLET MICHELLE R	6/1/18 0:00	3/31/20 0:00	Nursing Science Review Committee[NRRC(70)]	10906545	13	OTHER HEALTH PROFESSIONS	621889815	QHF5ZZ114M72	621889815	QHF5ZZ114M72	US	40.8415	-73.9414	1833205	COLUMBIA_U_HEALTH_SCI	NEW YORK	NY	SCHOOLS OF NURSING	100323725	UNITED STATES	N	43556	43921	361	Other Research-Related	7/11/05 0:00	11/30/46 0:00	NINR	90185	Private	TRUE	FALSE	NINR	10118580	43977	PA-16-193	4R00NR017651-03	R00
NIDDK	9114575	8/2/16 0:00	PA-14-042	5K99DK106550-02	5	K99	DK	106550	2		HAFT CAROL R	8/1/15 0:00	4/30/17 0:00	Diabetes Endocrinology and Metabolic Diseases B Study Section[DDK-B]	11244177	7	UnavaiLABle	71723621	C1CPANL3EWK4	71723621	C1CPANL3EWK4	US	42.33982	-71.10568	758101	BETH_ISRAEL_DEACONESS_MED_CTR	BOSTON	MA	Independent Hospitals	22155400	UNITED STATES	N	42583	42855	847	Other Research-Related	7/8/05 0:00	5/29/46 0:00	NIDDK	90000	Private	FALSE	FALSE	NIDDK	9532340	42957	PA-14-042	4R00DK106550-03	R00
NINDS	8679786	2/12/14 0:00	PA-11-197	1K99NS087110-01	1	K99	NS	87110	1		WHITTEMORE VICKY R	4/1/14 0:00	3/31/15 0:00	NST-2 Study Section [NST-2]	8647419	45	ANATOMY/CELL BIOLOGY	46705849	MJC5FCYQTPE6	46705849	MJC5FCYQTPE6	US	33.64852	-117.82136	577504	U_OF_CALIFORNIA-IRVINE	IRVINE	CA	SCHOOLS OF MEDICINE	926970001	UNITED STATES	N	41730	42094	853	Other Research-Related	7/6/05 0:00	5/29/46 0:00	NINDS	90000	Public	FALSE	FALSE	NINDS	9034022	42090	PA-11-197	4R00NS087110-02	R00
NHLBI	8894577	7/31/15 0:00	PA-11-197	5K99HL119638-02	5	K99	HL	119638	2		CHANG HENRY	8/1/14 0:00	7/31/16 0:00	ZHL1-CSR-P(M1)	10314891	27	NONE	9584210	U2JMKHNS5TG4	9584210	U2JMKHNS5TG4	US	34.134332	-118.12652	1073501	CALIFORNIA_INST_OF_TECH	PASADENA	CA	SCHOOLS OF ARTS AND SCIENCES	911250001	UNITED STATES	N	42217	42582	837	Other Research-Related	7/7/05 0:00	5/29/46 0:00	NHLBI	90000	Private	FALSE	FALSE	NHLBI	9306249	42601	PA-11-197	4R00HL119638-03	R00
NHGRI	9549126	6/21/18 0:00	PA-16-193	5K99HG009680-02	5	K99	HG	9680	2		SOFIA HEIDI J	8/24/17 0:00	4/30/19 0:00	Genome Research Study Section[GNOM-G]	14741698	52	INTERNAL MEDICINE/MEDICINE	804355790	UYTTZT6G9DT1	804355790	UYTTZT6G9DT1	US	32.876991	-117.24087	577507	U_OF_CALIFORNIA_SAN_DIEGO	LA JOLLA	CA	SCHOOLS OF MEDICINE	920930621	UNITED STATES	N	43282	43585	172	Other Research-Related	7/10/05 0:00	6/10/24 0:00	NHGRI	81977	public	TRUE	TRUE	NHGRI	9857305	43578	PA-16-193	4R00HG009680-03	R00
NCI	9774791	8/15/19 0:00	PA-18-398	5K99CA226366-02	5	K99	CA	226366	2		SCHMIDT MICHAEL K	9/1/18 0:00	1/31/20 0:00	Transition to Independence Study Section (I)[NCI-I]	12631525	7	ENGINEERING (ALL TYPES)	49435266	THL6A6JLE1S7	49435266	THL6A6JLE1S7	US	42.349594	-71.099726	10001093	BOSTON_U_(CHARLES_RIVER_CAMPUS)	BOSTON	MA	BIOMED ENGR/COL ENGR/ENGR STA	22151390	UNITED STATES	N	43709	43861	398	Other Research-Related	7/11/05 0:00	8/26/42 0:00	NCI	161676	Private	FALSE	FALSE	NCI	10073690	43847	PA-18-398	4R00CA226366-03	R00
NIMH	8443004	9/4/12 0:00	PA-11-197	1K99MH096939-01A1	1	K99	MH	96939	1	A	ANDERSON KATHLEEN C	9/5/12 0:00	8/31/13 0:00	ZMH1-ERB-L(06)	10450050	3	NEUROSCIENCES	43207562	FL6GV84CKN57	43207562	FL6GV84CKN57	US	41.310925	-72.926428	9420201	YALE_U	NEW HAVEN	CT	SCHOOLS OF MEDICINE	65208327	UNITED STATES	N	41157	41517	242	Other Research-Related	7/4/05 0:00	2/9/53 0:00	NIMH	92448	Private	FALSE	FALSE	NIMH	8704190	41512	PA-11-197	4R00MH096939-02	R00
NIA	8549054	8/15/13 0:00	PA-11-197	5K99AG041765-02	5	K99	AG	41765	2		FINKELSTEIN DAVID B	9/30/12 0:00	12/31/13 0:00	Biological Aging Study Section[NIA-B]	7530921	7	UnavaiLABle	120989983	C186U32QSBR9	120989983	C186U32QSBR9	US	42.363037	-71.08963	1742101	WHITEHEAD_INST_FOR_BIOMED_RES	CAMBRIDGE	MA	Research Institutes	21421025	UNITED STATES	N	41518	41639	866	Other Research-Related	7/5/05 0:00	6/21/38 0:00	NIA	50577	Private	FALSE	FALSE	NIA	8779807	41632	PA-11-197	4R00AG041765-03	R00
NCI	10128169	8/12/20 0:00	PA-18-591	3K99CA234391-02S1	3	K99	CA	234391	2	S	JAKOWLEW SONIA B	8/1/19 0:00	7/31/21 0:00	Transition to Independence Study Section (I)[NCI-I]	10947813	7	UnavaiLABle	118069611	J19ZXYATJLT3	118069611	J19ZXYATJLT3	US	33.452982	-112.066306	10001715	TRANSLATIONAL_GENOMICS_RES_INST	PHOENIX	AZ	Other Domestic Non-Profits	850042274	UNITED STATES	N	44044	44408	398	Other Research-Related	7/12/05 0:00	11/4/47 0:00	NCI	54000	Private	FALSE	FALSE	NCI	10452187	##########	PA-18-398	4R00CA234391-03	R00
NHLBI	8247723	3/30/12 0:00	PA-10-063	5K99HL107744-02	5	K99	HL	107744	2		CARLSON DREW E	4/1/11 0:00	3/31/13 0:00	ZHL1-CSR-Z(F2)	10492956	52	INTERNAL MEDICINE/MEDICINE	804355790	UYTTZT6G9DT1	804355790	UYTTZT6G9DT1	US	32.876991	-117.24087	577507	U_OF_CALIFORNIA_SAN_DIEGO	LA JOLLA	CA	SCHOOLS OF MEDICINE	920930621	UNITED STATES	N	41000	41364	837	Other Research-Related	7/4/05 0:00	8/28/39 0:00	NHLBI	87534	public	FALSE	TRUE	NHLBI	8639631	41414	PA-10-063	4R00HL107744-03	R00
NIBIB	7952740	8/20/10 0:00	PA-09-036	1K99EB012064-01	1	K99	EB	12064	1		ERIM ZEYNEP	9/1/10 0:00	8/31/11 0:00	ZEB1-OSR-C(M1)	9424835	12	RADIATION-DIAGNOSTIC/ONCOLOGY	94878337	KMH5K9V7S518	94878337	KMH5K9V7S518	US	37.767442	-122.413937	577508	U_OF_CALIFORNIA_SAN_FRANCISCO	SAN FRANCISCO	CA	SCHOOLS OF MEDICINE	941432510	UNITED STATES	N	40422	40786	286	Other Research-Related	7/2/05 0:00	7/1/28 0:00	NIBIB	83459	public	TRUE	TRUE	NIBIB	8280591	40786	PA-11-197	4R00EB012064-02	R00
NIDCD	9741686	6/26/19 0:00	PA-16-193	5K99DC016640-02	5	K99	DC	16640	2		RIVERA-RENTAS ALBERTO L	7/10/18 0:00	6/30/20 0:00	Communication Disorders Review Committee[CDRC]	12252365	7	OTHER HEALTH PROFESSIONS	605799469	HD1WMN6945W6	605799469	HD1WMN6945W6	US	47.660307	-122.315168	9087701	U_OF_WASHINGTON	SEATTLE	WA	SCHOOLS OF ARTS AND SCIENCES	981959472	UNITED STATES	N	43647	44012	173	Other Research-Related	7/11/05 0:00	9/4/50 0:00	NIDCD	128083	Public	FALSE	TRUE	NIDCD	10204328	44039	PA-16-193	4R00DC016640-03	R00
NIDCD	7918882	8/27/10 0:00	PA-07-297	5K99DC010196-02	5	K99	DC	10196	2		SKLARE DAN	9/1/09 0:00	12/31/10 0:00	Communication Disorders Review Committee[CDRC]	9611409	8	UnavaiLABle	73130411	FLJ7DQKLL226	73130411	FLJ7DQKLL226	US	42.363198	-71.068772	4907701	MASSACHUSETTS_GENERAL_HOSP	BOSTON	MA	Independent Hospitals	21142621	UNITED STATES	N	40422	40543	173	Other Research-Related	7/2/05 0:00	11/18/44 0:00	NIDCD	89443	Private	FALSE	FALSE	NIDCD	8206326	40570	PA-07-297	4R00DC010196-03	R00
NIBIB	7666731	7/31/09 0:00	PA-07-297	5K99EB008738-02	5	K99	EB	8738	2		ERIM ZEYNEP	8/1/08 0:00	7/31/10 0:00	ZEB1-OSR-E(M1)S	9206007	18	ENGINEERING (ALL TYPES)	9214214	HJD6G4D6TJY5	9214214	HJD6G4D6TJY5	US	37.426852	-122.17047	8046501	STANFORD_U	STANFORD	CA	BIOMED ENGR/COL ENGR/ENGR STA	943052004	UNITED STATES	N	40026	40390	286	Other Research-Related	7/1/05 0:00	9/25/37 0:00	NIBIB	86832	Private	FALSE	FALSE	NIBIB	8122548	40421	PA-10-063	4R00EB008738-03	R00
NIGMS	7404454	3/28/08 0:00	PA-06-133	5K99GM080352-02	5	K99	GM	80352	2		DEATHERAGE JAMES F	4/15/07 0:00	3/31/09 0:00	ZGM1-BRT-9(KR)	8661302	49	UnavaiLABle	781613492	PHZJFZ32NKH4	781613492	PHZJFZ32NKH4	US	32.903062	-117.243592	7375802	SCRIPPS_RES_INST_THE	LA JOLLA	CA	Other Domestic Non-Profits	920371000	UNITED STATES	N	39539	39903	859	Other Research-Related	6/30/05 0:00	5/29/46 0:00	NIGMS	90000	Private	FALSE	FALSE	NIGMS	7784288	39902	PA-09-036	4R00GM080352-03	R00
NHLBI	8485659	4/15/13 0:00	PA-11-197	5K99HL113164-02	5	K99	HL	113164	2		WOLZ MICHAEL	6/15/12 0:00	8/31/13 0:00	ZHL1-CSR-P(F1)	10924653	7	BIOSTATISTICS & OTHER MATH SCI	149617367	UNVDZNFA8R29	149617367	UNVDZNFA8R29	US	42.335306	-71.102775	3212904	HARVARD_SCH_OF_PUBLIC_HEALTH	BOSTON	MA	SCHOOLS OF PUBLIC HEALTH	21156028	UNITED STATES	N	41365	41517	837	Other Research-Related	7/5/05 0:00	4/9/35 0:00	NHLBI	85932	Private	TRUE	FALSE	NHLBI	8664505	41506	PA-11-197	4R00HL113164-03	R00
NIDCR	8923237	7/24/15 0:00	PAR-14-057	5K99DE024173-02	5	K99	DE	24173	2		FRIEDEN LESLIE A	9/15/14 0:00	3/31/16 0:00	NIDCR Special Grants Review Committee[DSR]	11678874	18	OTOLARYNGOLOGY	4514360	MKAGLD59JRL1	4514360	MKAGLD59JRL1	US	40.440909	-79.959125	2059802	U_OF_PITTSBURGH_AT_PITTSBURGH	PITTSBURGH	PA	SCHOOLS OF MEDICINE	152133320	UNITED STATES	N	42248	42460	121	Other Research-Related	7/7/05 0:00	2/21/47 0:00	NIDCR	126792	Public	FALSE	FALSE	NIDCR	9174421	42447	PAR-14-057	4R00DE024173-03	R00
NIA	8819492	2/19/15 0:00	PA-11-197	5K99AG045200-02	5	K99	AG	45200	2		FRIDELL YIH-WOEI	3/15/14 0:00	12/31/15 0:00	Biological Aging Study Section[NIA-B]	8445705	7	PATHOLOGY	605799469	HD1WMN6945W6	605799469	HD1WMN6945W6	US	47.660307	-122.315168	9087701	U_OF_WASHINGTON	SEATTLE	WA	SCHOOLS OF MEDICINE	981959472	UNITED STATES	N	42064	42369	866	Other Research-Related	7/7/05 0:00	5/29/46 0:00	NIA	90000	Public	FALSE	FALSE	NIA	9193857	42450	PA-11-197	4R00AG045200-03	R00
NIA	9543943	7/25/18 0:00	PA-16-193	5K99AG056598-02	5	K99	AG	56598	2		ONKEN LISA	8/15/17 0:00	2/15/20 0:00	Basic Neuroscience of Aging Study Section[NIA-N]	14328994	12	PSYCHIATRY	94878337	KMH5K9V7S518	94878337	KMH5K9V7S518	US	37.767442	-122.413937	577508	U_OF_CALIFORNIA_SAN_FRANCISCO	SAN FRANCISCO	CA	SCHOOLS OF MEDICINE	941432510	UNITED STATES	N	43313	43876	866	Other Research-Related	7/10/05 0:00	6/5/71 0:00	NIA	135662	public	TRUE	TRUE	NIA	10070214	43902	PA-16-193	4R00AG056598-03	R00
NIA	7530607	7/22/08 0:00	PA-07-297	1K99AG031293-01A1	1	K99	AG	31293	1	A	SNYDER STEPHEN D	8/1/08 0:00	7/31/10 0:00	Basic Neuroscience of Aging Study Section[NIA-N]	8906873	5	NEUROLOGY	555917996	KABJZBBJ4B54	555917996	KABJZBBJ4B54	US	44.975143	-93.227003	1450402	U_OF_MINNESOTA	MINNEAPOLIS	MN	SCHOOLS OF MEDICINE	554552070	UNITED STATES	N	39661	40390	866	Other Research-Related	6/30/05 0:00	9/12/21 0:00	NIA	80975	Public	TRUE	TRUE	NIA	8138213	40437		4R00AG031293-02	R00
NIDCR	7628542	4/14/09 0:00	PA-06-133	5K99DE018954-02	5	K99	DE	18954	2		FRIEDEN LESLIE A	6/1/08 0:00	5/31/10 0:00	NIDCR Special Grants Review Committee[DSR]	8815125	18	DENTISTRY	4514360	MKAGLD59JRL1	4514360	MKAGLD59JRL1	US	40.440909	-79.959125	2059802	U_OF_PITTSBURGH_AT_PITTSBURGH	PITTSBURGH	PA	SCHOOLS OF DENTISTRY/ORAL HYGN	152133320	UNITED STATES	N	39965	40329	121	Other Research-Related	7/1/05 0:00	11/24/44 0:00	NIDCR	89449	Public	TRUE	TRUE	NIDCR	8059296	40297	PA-06-133	4R00DE018954-03	R00
NICHD	9123640	7/26/16 0:00	PA-14-042	5K99HD084758-02	5	K99	HD	84758	2		ESPOSITO LAYLA E	8/10/15 0:00	8/31/17 0:00	Health Behavior and Context Study Section[CHHD-M]	10602020	12	PSYCHIATRY	94878337	KMH5K9V7S518	94878337	KMH5K9V7S518	US	37.767442	-122.413937	577508	U_OF_CALIFORNIA_SAN_FRANCISCO	SAN FRANCISCO	CA	SCHOOLS OF MEDICINE	941432510	UNITED STATES	N	42583	42978	865	Other Research-Related	7/8/05 0:00	8/25/70 0:00	NICHD	135378	public	FALSE	FALSE	NICHD	9538329	42975	PA-14-042	4R00HD084758-03	R00
NIAID	9733912	6/12/19 0:00	PA-16-193	5K99AI139344-02	5	K99	AI	139344	2		ERNST NANCY L	7/1/18 0:00	6/30/20 0:00	Microbiology and Infectious Diseases Advisory Committee[MID]	12330439	7	UnavaiLABle	78200995	HMSNCM57QNR5	78200995	HMSNCM57QNR5	US	47.627342	-122.331593	861001	FRED_HUTCHINSON_CANCER_RES_CTR	SEATTLE	WA	Research Institutes	981094433	UNITED STATES	N	43647	44012	855	Other Research-Related	7/11/05 0:00	6/18/97 0:00	NIAID	108648	Private	FALSE	FALSE	NIAID	10166988	44005	PA-16-193	4R00AI139344-03	R00
NIGMS	8527807	8/2/13 0:00	PA-11-197	5K99GM102288-02	5	K99	GM	102288	2		GERRATANA BARBARA	8/13/12 0:00	7/31/14 0:00	ZGM1-BRT-X(KR)	7844746	18	CHEMISTRY	9214214	HJD6G4D6TJY5	9214214	HJD6G4D6TJY5	US	37.426852	-122.17047	8046501	STANFORD_U	STANFORD	CA	SCHOOLS OF ARTS AND SCIENCES	943052004	UNITED STATES	N	41487	41851	859	Other Research-Related	7/5/05 0:00	5/29/46 0:00	NIGMS	90000	Private	FALSE	FALSE	NIGMS	8973668	41983	PA-11-197	4R00GM102288-03	R00
NIGMS	8224560	2/27/12 0:00	PA-10-063	1K99GM099904-01	1	K99	GM	99904	1		GERRATANA BARBARA	3/1/12 0:00	2/28/13 0:00	ZGM1-BRT-X(KR)	10652468	7	BIOCHEMISTRY	47006379	JDLVAVGYJQ21	47006379	JDLVAVGYJQ21	US	42.335672	-71.104237	3212902	HARVARD_MED_SCH	BOSTON	MA	SCHOOLS OF MEDICINE	21201616	UNITED STATES	N	40969	41333	859	Other Research-Related	7/4/05 0:00	5/29/46 0:00	NIGMS	90000	Private	FALSE	FALSE	NIGMS	8695588	41498	PA-10-063	4R00GM099904-02	R00
NICHD	10405887	7/12/21	PA-20-272	3K99HD099325-02S1	3	K99	HD	99325	2	S	MILLER BRETT	8/1/21	1/31/22		14787406	52	PSYCHOLOGY	804355790	UYTTZT6G9DT1	804355790	UYTTZT6G9DT1	US	32.876991	-117.24087	577507	U_OF_CALIFORNIA_SAN_DIEGO	LA JOLLA	CA	SCHOOLS OF ARTS AND SCIENCES	920930621	UNITED STATES	N	8/1/21	1/31/22	865	Other Research-Related	7/13/05 0:00	6/27/07 0:00	NICHD	2735	public	FALSE	TRUE	NICHD	10682744	9/1/22	PA-18-398	4R00HD099325-03	R00
NHLBI	9468414	6/20/18 0:00	PA-16-193	5K99HL133472-02	5	K99	HL	133472	2		HUANG LI-SHIN	7/1/17 0:00	4/14/19 0:00	NHLBI Mentored Transition to Independence Study Section[MTI(JA)]	12170993	18	INTERNAL MEDICINE/MEDICINE	9214214	HJD6G4D6TJY5	9214214	HJD6G4D6TJY5	US	37.426852	-122.17047	8046501	STANFORD_U	STANFORD	CA	SCHOOLS OF MEDICINE	943052004	UNITED STATES	N	43282	43569	837	Other Research-Related	7/10/05 0:00	4/13/49 0:00	NHLBI	127574	Private	FALSE	FALSE	NHLBI	9882384	43561	PA-16-193	4R00HL133472-03	R00
NIGMS	9849307	12/31/19 0:00	PA-18-398	5K99GM131023-02	5	K99	GM	131023	2		SESMA MICHAEL A	1/10/19 0:00	8/31/20 0:00	ZGM1-TWD-8(KR)	15348684	2	MISCELLANEOUS	7431505	SPVKK1RC2MZ3	7431505	SPVKK1RC2MZ3	US	40.013296	-105.251932	1199902	U_OF_COLORADO	Boulder	CO	ORGANIZED RESEARCH UNITS	803031058	UNITED STATES	N	43831	44074	859	Other Research-Related	7/12/05 0:00	9/24/73 0:00	NIGMS	99980	Public	FALSE	FALSE	NIGMS	10226388	44083	PA-18-398	4R00GM131023-03	R00
NHLBI	8722022	41800	PA-11-197	5K99HL119617-02	5	K99	HL	119617	2		CARLSON DREW E	41501	42185	ZHL1-CSR-P(M2)	10731263	18	INTERNAL MEDICINE/MEDICINE	9214214	HJD6G4D6TJY5	9214214	HJD6G4D6TJY5	US	37.426852	-122.17047	8046501	STANFORD_U	STANFORD	CA	SCHOOLS OF MEDICINE	943052004	UNITED STATES	N	41821	42185	837	Other Research-Related	2014	125290	NHLBI	125290	Private	TRUE	FALSE	NHLBI	9270110	42606	PA-11-197	4R00HL119617-03	R00
NIAAA	7693671	8/28/09 0:00	PA-07-297	5K99AA017669-02	5	K99	AA	17669	2		WHITE AARON	9/30/08 0:00	8/31/10 0:00	Epidemiology Prevention and Behavior Research Study Section[AA-2]	7893190	7	PSYCHOLOGY	56915069	RL3YF9NM92A3	56915069	RL3YF9NM92A3	US	37.573875	-77.538399	6980601	U_OF_RICHMOND	RICHMOND	VA	SCHOOLS OF ARTS AND SCIENCES	231730001	UNITED STATES	N	40057	40421	273	Other Research-Related	7/1/05 0:00	2/16/78 0:00	NIAAA	101586	private	FALSE	FALSE	NIAAA	8144528	40445		4R00AA017669-03	R00
NIDCR	8299845	3/28/12 0:00	PA-11-197	1K99DE022101-01A1	1	K99	DE	22101	1	A	FRIEDEN LESLIE A	4/1/12 0:00	3/31/13 0:00	ZDE1-RK(04)	10517887	4	PSYCHOLOGY	608195277	D3LHU66KBLD5	608195277	D3LHU66KBLD5	US	35.9316	-79.057377	578206	U_OF_NORTH_CAROLINA_CHAPEL_HILL	CHAPEL HILL	NC	SCHOOLS OF MEDICINE	275995023	UNITED STATES	N	41000	41364	121	Other Research-Related	7/4/05 0:00	10/6/17 0:00	NIDCR	79538	Public	FALSE	FALSE	NIDCR	8619710	41344	PA-11-197	4R00DE022101-02	R00
NIAAA	8422994	1/21/13 0:00	PA-10-063	5K99AA020869-02	5	K99	AA	20869	2		WHITE AARON	2/10/12 0:00	1/31/14 0:00	Epidemiology Prevention and Behavior Research Study Section[AA-2]	10742432	7	PSYCHIATRY	605799469	HD1WMN6945W6	605799469	HD1WMN6945W6	US	47.660307	-122.315168	9087701	U_OF_WASHINGTON	SEATTLE	WA	SCHOOLS OF MEDICINE	981959472	UNITED STATES	N	41306	41670	273	Other Research-Related	7/5/05 0:00	6/5/39 0:00	NIAAA	123974	Public	FALSE	TRUE	NIAAA	8776071	41669	PA-10-063	4R00AA020869-03	R00
NHLBI	8306031	6/29/12 0:00	PA-10-063	5K99HL109079-02	5	K99	HL	109079	2		SCOTT JANE	8/1/11 0:00	12/31/12 0:00	ZHL1-CSR-Z(M1)	9705181	12	BIOCHEMISTRY	94878337	KMH5K9V7S518	94878337	KMH5K9V7S518	US	37.767442	-122.413937	577508	U_OF_CALIFORNIA_SAN_FRANCISCO	SAN FRANCISCO	CA	SCHOOLS OF MEDICINE	941432510	UNITED STATES	N	41091	41274	837	Other Research-Related	7/4/05 0:00	12/17/42 0:00	NHLBI	88741	public	FALSE	FALSE	NHLBI	8598276	41330	PA-10-063	4R00HL109079-03	R00
NCI	8883435	5/12/15 0:00	PA-11-197	5K99CA181342-02	5	K99	CA	181342	2		RADAEV SERGEY	7/1/14 0:00	2/29/16 0:00	Transition to Independence Study Section (I)[NCI-I]	10959055	7	UnavaiLABle	71723621	C1CPANL3EWK4	71723621	C1CPANL3EWK4	US	42.33982	-71.10568	758101	BETH_ISRAEL_DEACONESS_MED_CTR	BOSTON	MA	Independent Hospitals	22155400	UNITED STATES	N	42186	42429	398	Other Research-Related	7/7/05 0:00	7/13/64 0:00	NCI	169668	Private	FALSE	FALSE	NCI	9231531	42452	PA-11-197	4R00CA181342-03	R00
NHLBI	7762030	2/22/10 0:00	PA-09-036	1K99HL098076-01	1	K99	HL	98076	1		CARLSON DREW E	3/1/10 0:00	2/28/11 0:00	ZHL1-CSR-Z(O2)	9746715	1	UnavaiLABle	71284913	JZD1HLM2ZU83	71284913	JZD1HLM2ZU83	US	39.140663	-84.501007	615001	CINCINNATI_CHILDRENS_HOSP_MED_CTR	CINCINNATI	OH	Independent Hospitals	452293039	UNITED STATES	N	40238	40602	837	Other Research-Related	7/2/05 0:00	11/10/64 0:00	NHLBI	96740	Private	FALSE	FALSE	NHLBI	8231615	40604	PA-09-036	4R00HL098076-02	R00
NHLBI	9949086	7/30/20 0:00	PA-19-130	1K99HL151670-01	1	K99	HL	151670	1		GOMEZ CHRISTIAN RENE	8/1/20 0:00	8/31/21 0:00	NHLBI Mentored Transition to Independence Study Section[MTI(JA)]	15986956	3	BIOMEDICAL ENGINEERING	42250712	GM1XX56LEP58	42250712	GM1XX56LEP58	US	39.953462	-75.193983	6463801	U_OF_PENNSYLVANIA	PHILADELPHIA	PA	BIOMED ENGR/COL ENGR/ENGR STA	191046205	UNITED STATES	N	44044	44439	838	Other Research-Related	7/12/05 0:00	2/1/39 0:00	NHLBI	123850	Private	FALSE	FALSE	NHLBI	10445569	##########	PA-19-130	4R00HL151670-02	R00
NICHD	9857055	2/11/20 0:00	PA-18-398	5K99HD097297-02	5	K99	HD	97297	2		MUKHOPADHYAY MAHUA	2/1/19 0:00	10/31/20 0:00	Developmental Biology Study Section[CHHD-C]	11965650	5	MICROBIOLOGY/IMMUN/VIROLOGY	82359691	LN53LCFJFL45	82359691	LN53LCFJFL45	US	42.369697	-71.11193	3212901	HARVARD_U	CAMBRIDGE	MA	SCHOOLS OF ARTS AND SCIENCES	21385369	UNITED STATES	N	43862	44135	865	Other Research-Related	7/12/05 0:00	2/4/52 0:00	NICHD	128601	Private	FALSE	FALSE	NICHD	10257934	44086	PA-18-398	4R00HD097297-03	R00
NIMH	9564982	8/2/18 0:00	PA-16-193	5K99MH112840-02	5	K99	MH	112840	2		VAN'T VEER ASHLEE V	9/15/17 0:00	10/31/19 0:00	ZMH1-ERB-X(06)	11340179	18	BIOMEDICAL ENGINEERING	9214214	HJD6G4D6TJY5	9214214	HJD6G4D6TJY5	US	37.426852	-122.17047	8046501	STANFORD_U	STANFORD	CA	SCHOOLS OF MEDICINE	943052004	UNITED STATES	N	43344	43769	242	Other Research-Related	7/10/05 0:00	5/18/30 0:00	NIMH	120669	Private	FALSE	FALSE	NIMH	10164909	44015	PA-16-193	4R00MH112840-03	R00
NIAID	8111575	2/17/11 0:00	PA-10-063	1K99AI089935-01A1	1	K99	AI	89935	1	A	PROGRAIS LAWRENCE J	3/1/11 0:00	3/8/12 0:00	Allergy Immunology and Transplantation Research Committee[AITC]	10192078	12	UnavaiLABle	64931884	KUKXRCZ6NZC2	64931884	KUKXRCZ6NZC2	US	40.764045	-73.956024	5079202	SLOAN-KETTERING_INST_CAN_RES	NEW YORK	NY	Research Institutes	100656007	UNITED STATES	N	40603	40976	855	Other Research-Related	7/3/05 0:00	1/13/58 0:00	NIAID	94247	Private	FALSE	FALSE	NIAID	8403190	40976	PA-11-197	4R00AI089935-02	R00
NLM	8805849	2/5/15 0:00	PA-11-197	5K99LM011673-02	5	K99	LM	11673	2		YE JANE	2/15/14 0:00	8/31/15 0:00	ZLM1-ZH-C(01)	10585025	18	MISCELLANEOUS	4514360	MKAGLD59JRL1	4514360	MKAGLD59JRL1	US	40.440909	-79.959125	2059802	U_OF_PITTSBURGH_AT_PITTSBURGH	PITTSBURGH	PA	SCHOOLS OF MEDICINE	152133320	UNITED STATES	N	42036	42247	879	Other Research-Related	7/7/05 0:00	2/9/53 0:00	NLM	55924	Public	TRUE	TRUE	NLM	9116995	42238	PA-11-197	4R00LM011673-03	R00
NCI	9267141	4/27/17 0:00	PA-15-083	5K99CA197672-02	5	K99	CA	197672	2		SCHMIDT MICHAEL K	5/1/16 0:00	8/31/17 0:00	Transition to Independence Study Section (I)[NCI-I]	11195866	30	ANATOMY/CELL BIOLOGY	800771545	YZJ6DKPM4W63	800771545	YZJ6DKPM4W63	US	32.811963	-96.837534	578404	UT_SOUTHWESTERN_MED_CTR	DALLAS	TX	SCHOOLS OF MEDICINE	753909105	UNITED STATES	N	42856	42978	398	Other Research-Related	7/9/05 0:00	3/23/96 0:00	NCI	144720	Public	FALSE	FALSE	NCI	9532335	42982	PA-15-083	4R00CA197672-03	R00
AHRQ	8705396	7/11/14 0:00	RFA-HS-13-002	5K99HS022408-02	5	K99	HS	22408	2		WILLIS TAMARA	8/1/13 0:00	7/31/15 0:00	ZHS1-HSR-C(01)	11640501	12	INTERNAL MEDICINE/MEDICINE	94878337	KMH5K9V7S518	94878337	KMH5K9V7S518	US	37.767442	-122.413937	577508	U_OF_CALIFORNIA_SAN_FRANCISCO	SAN FRANCISCO	CA	SCHOOLS OF MEDICINE	941432510	UNITED STATES	N	41852	42216	226	Other Research-Related	7/6/05 0:00	1/11/28 0:00	AHRQ	156335	public	TRUE	TRUE	AHRQ	9088538	42213	RFA-HS-13-002	4R00HS022408-03	R00
NHLBI	8700065	4/30/14 0:00	PA-11-197	1K99HL116654-01A1	1	K99	HL	116654	1	A	CARLSON DREW E	5/1/14 0:00	1/1/15 0:00	ZHL1-CSR-P(F1)	10888418	7	BIOLOGY	1425594	E2NYLCDML6V1	1425594	E2NYLCDML6V1	US	42.359128	-71.093339	4911501	MASSACHUSETTS_INST_OF_TECH	CAMBRIDGE	MA	SCHOOLS OF ARTS AND SCIENCES	21421029	UNITED STATES	N	41760	42005	837	Other Research-Related	7/6/05 0:00	7/5/80 0:00	NHLBI	65932	Private	FALSE	FALSE	NHLBI	8974571	42023	PA-11-197	4R00HL116654-02	R00
NHLBI	7323252	1/17/08 0:00	PA-06-133	5K99HL087513-02	5	K99	HL	87513	2		COMMARATO MICHAEL	12/1/06 0:00	2/22/09 0:00	ZHL1-CSR-M(F1)	7297017	7	PATHOLOGY	605799469	HD1WMN6945W6	605799469	HD1WMN6945W6	US	47.660307	-122.315168	9087701	U_OF_WASHINGTON	SEATTLE	WA	SCHOOLS OF MEDICINE	981959472	UNITED STATES	N	39417	39866	837	Other Research-Related	6/30/05 0:00	10/20/20 0:00	NHLBI	80648	Public	TRUE	TRUE	NHLBI	7760735	39864		4R00HL087513-03	R00
NIAID	10211105	6/25/21	PA-19-130	5K99AI148511-03	5	K99	AI	148511	3		GAUTAM RAJEEV	7/15/20	6/30/22	Microbiology and Infectious Diseases Advisory Committee[MID]	14602045	2	INTERNAL MEDICINE/MEDICINE	161202122	LCLSJAGTNZQ7	161202122	LCLSJAGTNZQ7	US	43.068519	-89.400858	578503	U_OF_WISCONSIN-MADISON	MADISON	WI	SCHOOLS OF MEDICINE	537151218	UNITED STATES	N	7/1/21	6/30/22	855	Other Research-Related	7/13/05 0:00	8/21/82 0:00	NIAID	103233	public	FALSE	TRUE	NIAID	10558966	3/17/22	PA-19-130	4R00AI148511-04	R00
NIAAA	7479191	7/31/08 0:00	PA-06-133	5K99AA017376-02	5	K99	AA	17376	2		GAO PETER	8/1/07 0:00	1/31/10 0:00	Digestive Diseases and Nutrition C Study Section[DDK-C]	2196764	4	INTERNAL MEDICINE/MEDICINE	44387793	TP7EK8DZV6N5	44387793	TP7EK8DZV6N5	US	36.007766	-78.926475	2221101	DUKE_U	DURHAM	NC	SCHOOLS OF MEDICINE	277054673	UNITED STATES	N	39661	40209	273	Other Research-Related	6/30/05 0:00	3/6/24 0:00	NIAAA	81881	Private	FALSE	FALSE	NIAAA	8121191	40428	PA-09-036	4R00AA017376-03	R00
NCI	7952795	8/17/10 0:00	PA-09-036	1K99CA151460-01	1	K99	CA	151460	1		SCHMIDT MICHAEL K	9/1/10 0:00	8/31/11 0:00	Institutional Training and Education Study Section (F)[NCI-F]	8836865	49	UnavaiLABle	781613492	PHZJFZ32NKH4	781613492	PHZJFZ32NKH4	US	32.903062	-117.243592	7375802	SCRIPPS_RES_INST_THE	LA JOLLA	CA	Other Domestic Non-Profits	920371000	UNITED STATES	N	40422	40786	398	Other Research-Related	7/2/05 0:00	4/1/21 0:00	NCI	80811	Private	FALSE	FALSE	NCI	8318448	40806	PA-10-063	4R00CA151460-02	R00
NIMHD	9766397	5/14/19 0:00	PA-16-193	5K99MD012808-02	5	K99	MD	12808	2		RAJAPAKSE NISHADI	8/17/18 0:00	5/31/20 0:00	ZMD1-XLN(M1)	10600323	4	PUBLIC HEALTH & PREV MEDICINE	608195277	D3LHU66KBLD5	608195277	D3LHU66KBLD5	US	35.9316	-79.057377	578206	U_OF_NORTH_CAROLINA_CHAPEL_HILL	CHAPEL HILL	NC	SCHOOLS OF PUBLIC HEALTH	275995023	UNITED STATES	N	43617	43982	307	Other Research-Related	7/11/05 0:00	9/11/48 0:00	NIMHD	90836	Public	TRUE	TRUE	NIMHD	9993685	43983	PA-16-193	4R00MD012808-03	R00
NIA	9337336	4/25/17 0:00	PA-15-083	5K99AG053410-02	5	K99	AG	53410	2		ANDERSON DALLAS	9/1/16 0:00	12/31/17 0:00	Basic Neuroscience of Aging Study Section[NIA-N]	11289462	12	PUBLIC HEALTH & PREV MEDICINE	94878337	KMH5K9V7S518	94878337	KMH5K9V7S518	US	37.767442	-122.413937	577508	U_OF_CALIFORNIA_SAN_FRANCISCO	SAN FRANCISCO	CA	SCHOOLS OF MEDICINE	941432510	UNITED STATES	N	42856	43100	866	Other Research-Related	7/9/05 0:00	11/13/45 0:00	NIA	126327	public	TRUE	FALSE	NIA	9632885	43231	PA-15-083	4R00AG053410-03	R00
NIA	10158791	8/14/20 0:00	PA-18-591	3K99AG062778-02S1	3	K99	AG	62778	2	S	SIMMONS JANINE M	4/15/19 0:00	3/31/21 0:00		15433137	12	PSYCHIATRY	94878337	KMH5K9V7S518	94878337	KMH5K9V7S518	US	37.767442	-122.413937	577508	U_OF_CALIFORNIA_SAN_FRANCISCO	SAN FRANCISCO	CA	SCHOOLS OF MEDICINE	941432510	UNITED STATES	N	44058	44286	866	Other Research-Related	7/12/05 0:00	11/4/47 0:00	OD	54000	public	TRUE	TRUE	NIA	10319262	44294	PA-18-397	4R00AG062778-03	R00
NIGMS	9335930	8/29/17 0:00	PA-15-083	5K99GM120494-02	5	K99	GM	120494	2		FLICKER PAULA F	9/1/16 0:00	12/31/17 0:00	ZGM1-TWD-A(KR)	11368292	27	NONE	9584210	U2JMKHNS5TG4	9584210	U2JMKHNS5TG4	US	34.134332	-118.12652	1073501	CALIFORNIA_INST_OF_TECH	PASADENA	CA	SCHOOLS OF ARTS AND SCIENCES	911250001	UNITED STATES	N	42979	43100	859	Other Research-Related	7/9/05 0:00	8/7/79 0:00	NIGMS	29074	Private	FALSE	FALSE	NIGMS	9656243	43327	PA-15-083	4R00GM120494-03	R00
NIGMS	7929652	8/19/10 0:00	PA-07-297	5K99GM088484-02	5	K99	GM	88484	2		OKITA RICHARD T	9/7/09 0:00	12/31/11 0:00	ZGM1-BRT-9(KR)	8475970	13	BIOCHEMISTRY	124726725	GS3YEVSS12N6	124726725	GS3YEVSS12N6	US	37.870017	-122.268624	577502	U_OF_CALIFORNIA_BERKELEY	BERKELEY	CA	SCHOOLS OF ARTS AND SCIENCES	947101749	UNITED STATES	N	40422	40908	859	Other Research-Related	7/2/05 0:00	5/29/46 0:00	NIGMS	90000	public	FALSE	FALSE	NIGMS	8367844	40889		4R00GM088484-03	R00
NIDCD	10381894	4/12/21	PA-20-272	3K99DC017472-02S1	3	K99	DC	17472	2	S	KING KELLY ANNE	7/1/19	9/30/21		14334591	5	PSYCHOLOGY	555917996	KABJZBBJ4B54	555917996	KABJZBBJ4B54	US	44.975143	-93.227003	1450402	U_OF_MINNESOTA	MINNEAPOLIS	MN	SCHOOLS OF ARTS AND SCIENCES	554552070	UNITED STATES	N	7/1/21	9/30/21	173	Other Research-Related	7/13/05 0:00	3/29/82 0:00	NIDCD	30039	Public	FALSE	FALSE	NIDCD	10582772	5/17/22	PA-18-398	4R00DC017472-03	R00
NIA	8822783	2/19/15 0:00	PA-11-197	5K99AG045341-02	5	K99	AG	45341	2		GUO MAX	3/15/14 0:00	2/29/16 0:00	Biological Aging Study Section[NIA-B]	9801899	7	UnavaiLABle	78200995	HMSNCM57QNR5	78200995	HMSNCM57QNR5	US	47.627342	-122.331593	861001	FRED_HUTCHINSON_CANCER_RES_CTR	SEATTLE	WA	Research Institutes	981094433	UNITED STATES	N	42064	42429	866	Other Research-Related	7/7/05 0:00	6/25/00 0:00	NIA	109750	Private	FALSE	FALSE	NIA	9264687	42521	PA-11-197	4R00AG045341-03	R00
NHGRI	8460833	5/24/13 0:00	PA-10-063	5K99HG006452-02	5	K99	HG	6452	2		BOYER JOY	6/1/12 0:00	8/18/14 0:00	Special Emphasis Panel[ZRG1-SEIR-B(01)Q]	10669712	18	SOCIAL SCIENCES	9214214	HJD6G4D6TJY5	9214214	HJD6G4D6TJY5	US	37.426852	-122.17047	8046501	STANFORD_U	STANFORD	CA	SCHOOLS OF MEDICINE	943052004	UNITED STATES	N	41426	41869	172	Other Research-Related	7/5/05 0:00	5/6/34 0:00	NHGRI	85594	Private	FALSE	FALSE	NHGRI	8882793	41869	PA-10-063	4R00HG006452-03	R00
NIGMS	8011320	12/30/10 0:00	PA-09-036	5K99GM089765-02	5	K99	GM	89765	2		FLICKER PAULA F	1/1/10 0:00	6/30/11 0:00	ZGM1-BRT-9(KR)	6420773	2	ZOOLOGY	161202122	LCLSJAGTNZQ7	161202122	LCLSJAGTNZQ7	US	43.068519	-89.400858	578503	U_OF_WISCONSIN-MADISON	MADISON	WI	SCHOOLS OF ARTS AND SCIENCES	537151218	UNITED STATES	N	40544	40724	859	Other Research-Related	7/3/05 0:00	3/15/23 0:00	NIGMS	45000	public	FALSE	FALSE	NIGMS	8298702	40791		4R00GM089765-03	R00
NIDCD	7493517	39675	PA-06-133	5K99DC009007-02	5	K99	DC	9007	2		SKLARE DAN	39331	40056	Communication Disorders Review Committee[CDRC]	6668837	7	BIOMEDICAL ENGINEERING	1910777	FTMTDMBR29C7	1910777	FTMTDMBR29C7	US	39.325256	-76.605131	4134401	JOHNS_HOPKINS_U	BALTIMORE	MD	SCHOOLS OF MEDICINE	212182680	UNITED STATES	N	39692	40056	173	Other Research-Related	2008	139401	NIDCD	139401	Private	FALSE	FALSE	NIDCD	7896978	40032	PA-09-036	4R00DC009007-03	R00
NIA	7766901	2/12/10 0:00	PA-07-297	5K99AG033050-02	5	K99	AG	33050	2		FINKELSTEIN DAVID B	2/15/09 0:00	8/31/10 0:00	Biological Aging Study Section[NIA-B]	7984733	7	UnavaiLABle	78200995	HMSNCM57QNR5	78200995	HMSNCM57QNR5	US	47.627342	-122.331593	861001	FRED_HUTCHINSON_CANCER_RES_CTR	SEATTLE	WA	Research Institutes	981094433	UNITED STATES	N	40224	40421	866	Other Research-Related	7/2/05 0:00	5/29/46 0:00	NIA	90000	Private	FALSE	FALSE	NIA	8084818	40442	PA-07-297	4R00AG033050-03	R00
NCI	9776495	6/28/19 0:00	PA-18-398	5K99CA234430-02	5	K99	CA	234430	2		SCHMIDT MICHAEL K	9/5/18 0:00	8/31/20 0:00	Transition to Independence Study Section (I)[NCI-I]	12537626	52	BIOLOGY	804355790	UYTTZT6G9DT1	804355790	UYTTZT6G9DT1	US	32.876991	-117.24087	577507	U_OF_CALIFORNIA_SAN_DIEGO	LA JOLLA	CA	SCHOOLS OF ARTS AND SCIENCES	920930621	UNITED STATES	N	43709	44074	398	Other Research-Related	7/11/05 0:00	11/29/73 0:00	NCI	136570	public	FALSE	FALSE	NCI	10216405	44063	PA-18-398	4R00CA234430-03	R00
NIDCR	9787439	7/30/19 0:00	PA-18-398	5K99DE027414-02	5	K99	DE	27414	2		FRIEDEN LESLIE A	9/18/18 0:00	8/31/20 0:00	NIDCR Special Grants Review Committee[DSR]	14270821	5	DENTISTRY	555917996	KABJZBBJ4B54	555917996	KABJZBBJ4B54	US	44.975143	-93.227003	1450402	U_OF_MINNESOTA	MINNEAPOLIS	MN	SCHOOLS OF DENTISTRY/ORAL HYGN	554552070	UNITED STATES	N	43709	44074	121	Other Research-Related	7/11/05 0:00	4/21/88 0:00	NIDCR	141827	Public	TRUE	TRUE	NIDCR	10212549	44075	PA-18-398	4R00DE027414-03	R00
NCI	7689814	8/13/09 0:00	PA-07-297	5K99CA137160-02	5	K99	CA	137160	2		SCHMIDT MICHAEL K	9/20/08 0:00	8/31/10 0:00	Institutional Training and Education Study Section (F)[NCI-F]	8244044	7	MICROBIOLOGY/IMMUN/VIROLOGY	5436803	KG76WYENL5K1	5436803	KG76WYENL5K1	US	42.050479	-87.680046	6144650	NORTHWESTERN_U	CHICAGO	IL	SCHOOLS OF MEDICINE	606114579	UNITED STATES	N	40057	40421	398	Other Research-Related	7/1/05 0:00	11/27/45 0:00	NCI	89817	Private	TRUE	FALSE	NCI	8122505	40422	PA-07-297	4R00CA137160-03	R00
NLM	9503309	43262	PA-16-193	1K99LM012868-01	1	K99	LM	12868	1		HARDY LYNDA R	43282	43646	ZLM1-ZH-C(01)	11436575	7	PUBLIC HEALTH & PREV MEDICINE	605799469	HD1WMN6945W6	605799469	HD1WMN6945W6	US	47.660307	-122.315168	9087701	U_OF_WASHINGTON	SEATTLE	WA	SCHOOLS OF PUBLIC HEALTH	981959472	UNITED STATES	N	43282	43646	879	Other Research-Related	2018	127305	NLM	127305	Public	TRUE	TRUE	NLM	9925382	43651	PA-16-193	4R00LM012868-02	R00
NIA	9519772	6/22/18 0:00	PA-16-193	5K99AG056595-02	5	K99	AG	56595	2		KERR CANDACE L	7/1/17 0:00	6/30/19 0:00	Biological Aging Study Section[NIA-B]	8738788	3	PHYSIOLOGY	47120084	TX2DAGQPENZ5	47120084	TX2DAGQPENZ5	US	38.543366	-121.72946	577503	U_OF_CALIFORNIA_AT_DAVIS	DAVIS	CA	SCHOOLS OF MEDICINE	956186153	UNITED STATES	N	43282	43646	866	Other Research-Related	7/10/05 0:00	3/24/87 0:00	NIA	104909	Public	FALSE	FALSE	NIA	10003436	43717	PA-16-193	4R00AG056595-03	R00
NIBIB	10250537	8/27/21	PA-19-130	5K99EB028840-02	5	K99	EB	28840	2		RUSSELL LUISA MARIE	9/1/20	9/14/22	ZEB1-OSR-E(M1)S	12157164	12	BIOMEDICAL ENGINEERING	73133571	GNJ7BBP73WE9	73133571	GNJ7BBP73WE9	US	42.275494	-83.743038	1506502	U_OF_MICHIGAN_AT_ANN_ARBOR	ANN ARBOR	MI	BIOMED ENGR/COL ENGR/ENGR STA	481091276	UNITED STATES	N	7/1/21	9/14/22	286	Other Research-Related	7/13/05 0:00	5/3/51 0:00	NIBIB	91800	Public	TRUE	TRUE	NIBIB	10683422	9/14/22	PA-19-130	4R00EB028840-03	R00
NICHD	8258801	4/2/12 0:00	PA-10-063	5K99HD064753-02	5	K99	HD	64753	2		TAYMANS SUSAN	4/18/11 0:00	12/31/13 0:00	Reproduction Andrology and Gynecology Study Section[CHHD-R]	7643547	7	UnavaiLABle	120989983	C186U32QSBR9	120989983	C186U32QSBR9	US	42.363037	-71.08963	1742101	WHITEHEAD_INST_FOR_BIOMED_RES	CAMBRIDGE	MA	Research Institutes	21421025	UNITED STATES	N	41000	41639	865	Other Research-Related	7/4/05 0:00	2/5/95 0:00	NICHD	107784	Private	FALSE	FALSE	NICHD	8785591	41704	PA-10-063	4R00HD064753-03	R00
NIMH	9621961	7/27/18 0:00	PA-16-193	1K99MH118134-01	1	K99	MH	118134	1		STIRRATT MICHAEL J	8/1/18 0:00	7/31/19 0:00	ZMH1-ERB-M(06)	12667018	7	PUBLIC HEALTH & PREV MEDICINE	605799469	HD1WMN6945W6	605799469	HD1WMN6945W6	US	47.660307	-122.315168	9087701	U_OF_WASHINGTON	SEATTLE	WA	SCHOOLS OF PUBLIC HEALTH	981959472	UNITED STATES	N	43313	43677	242	Other Research-Related	7/10/05 0:00	2/16/36 0:00	NIMH	122769	Public	FALSE	TRUE	NIMH	9986193	43720	PA-16-193	4R00MH118134-02	R00
NINDS	8537520	8/1/13 0:00	PA-11-197	5K99NS080911-02	5	K99	NS	80911	2		HE JANET	9/1/12 0:00	6/30/14 0:00	NST-2 Study Section [NST-2]	8301329	49	UnavaiLABle	78731668	NNJ6BMBTFGN5	78731668	NNJ6BMBTFGN5	US	32.8863	-117.243929	7210001	SALK_INST_FOR_BIOLOGICAL_STUDIES	La Jolla	CA	Research Institutes	920371002	UNITED STATES	N	41518	41820	853	Other Research-Related	7/5/05 0:00	5/8/32 0:00	NINDS	84866	Private	FALSE	FALSE	NINDS	8849552	41794	PA-11-197	4R00NS080911-03	R00
NCI	8301560	7/3/12 0:00	PA-10-063	5K99CA158136-02	5	K99	CA	158136	2		SCHMIDT MICHAEL K	7/15/11 0:00	7/2/12 0:00	Institutional Training and Education Study Section (F)[NCI-F]	10466807	12	PATHOLOGY	73133571	GNJ7BBP73WE9	73133571	GNJ7BBP73WE9	US	42.275494	-83.743038	1506502	U_OF_MICHIGAN_AT_ANN_ARBOR	ANN ARBOR	MI	SCHOOLS OF MEDICINE	481091276	UNITED STATES	N	41091	41092	398	Other Research-Related	7/4/05 0:00	1/1/00 0:00	NCI	1	Public	TRUE	TRUE	NCI	8526834	41169	PA-10-063	4R00CA158136-03	R00
NHLBI	7560403	2/2/09 0:00	PA-07-297	5K99HL091061-02	5	K99	HL	91061	2		COLOMBINI-HATCH SANDRA	2/1/08 0:00	7/31/10 0:00	ZHL1-CSR-S(O1)	8877434	52	PHARMACOLOGY	804355790	UYTTZT6G9DT1	804355790	UYTTZT6G9DT1	US	32.876991	-117.24087	577507	U_OF_CALIFORNIA_SAN_DIEGO	LA JOLLA	CA	SCHOOLS OF MEDICINE	920930621	UNITED STATES	N	39845	40390	838	Other Research-Related	7/1/05 0:00	7/25/31 0:00	NHLBI	84578	public	FALSE	TRUE	NHLBI	8097035	40427		4R00HL091061-03	R00
NIAID	8993143	6/10/15 0:00	PA-14-042	1K99AI120851-01	1	K99	AI	120851	1		D'SOUZA PATRICIA D	6/15/15 0:00	5/31/16 0:00	Acquired Immunodeficiency Syndrome Research Study Section[AIDS]	12305496	52	INTERNAL MEDICINE/MEDICINE	804355790	UYTTZT6G9DT1	804355790	UYTTZT6G9DT1	US	32.876991	-117.24087	577507	U_OF_CALIFORNIA_SAN_DIEGO	LA JOLLA	CA	SCHOOLS OF MEDICINE	920930621	UNITED STATES	N	42170	42521	855	Other Research-Related	7/7/05 0:00	1/17/40 0:00	NIAID	124200	public	TRUE	TRUE	NIAID	9281937	42566	PA-14-042	4R00AI120851-02	R00
NCI	8298843	9/15/12 0:00	PA-11-197	1K99CA167644-01A1	1	K99	CA	167644	1	A	SCHMIDT MICHAEL K	9/15/12 0:00	8/31/14 0:00	Institutional Training and Education Study Section (F)[NCI-F]	10566863	2	CHEMISTRY	7431505	SPVKK1RC2MZ3	7431505	SPVKK1RC2MZ3	US	40.013296	-105.251932	1199902	U_OF_COLORADO	Boulder	CO	SCHOOLS OF ARTS AND SCIENCES	803031058	UNITED STATES	N	41167	41517	398	Other Research-Related	7/4/05 0:00	5/29/46 0:00	NCI	90000	Public	FALSE	FALSE	NCI	8724761	41526	PA-11-197	4R00CA167644-03	R00
NHLBI	7770199	2/23/10 0:00	PA-09-036	1K99HL098277-01	1	K99	HL	98277	1		COMMARATO MICHAEL	3/1/10 0:00	2/28/11 0:00	ZHL1-CSR-Z(O2)	9743728	12	BIOCHEMISTRY	94878337	KMH5K9V7S518	94878337	KMH5K9V7S518	US	37.767442	-122.413937	577508	U_OF_CALIFORNIA_SAN_FRANCISCO	SAN FRANCISCO	CA	SCHOOLS OF MEDICINE	941432510	UNITED STATES	N	40238	40602	837	Other Research-Related	7/2/05 0:00	11/24/80 0:00	NHLBI	102598	public	TRUE	FALSE	NHLBI	8254664	40691	PA-10-063	4R00HL098277-02	R00
NIMHD	9676408	3/19/19 0:00	PA-16-193	5K99MD012615-02	5	K99	MD	12615	2		JEAN-FRANCOIS BEDA	4/1/18 0:00	9/30/19 0:00	ZMD1-RP(J1)	11627511	12	PUBLIC HEALTH & PREV MEDICINE	94878337	KMH5K9V7S518	94878337	KMH5K9V7S518	US	37.767442	-122.413937	577508	U_OF_CALIFORNIA_SAN_FRANCISCO	SAN FRANCISCO	CA	SCHOOLS OF MEDICINE	941432510	UNITED STATES	N	43556	43738	307	Other Research-Related	7/11/05 0:00	8/23/97 0:00	NIMHD	72190	public	TRUE	TRUE	NIMHD	9984873	43768	PA-16-193	4R00MD012615-03	R00
NIDCD	9053469	7/15/16 0:00	PA-14-042	5K99DC014520-02	5	K99	DC	14520	2		RIVERA-RENTAS ALBERTO L	7/1/15 0:00	8/31/17 0:00	ZDC1-SRB-K(15)	10310811	7	OTHER HEALTH PROFESSIONS	49435266	THL6A6JLE1S7	49435266	THL6A6JLE1S7	US	42.349594	-71.099726	10001093	BOSTON_U_(CHARLES_RIVER_CAMPUS)	BOSTON	MA	SCH ALLIED HEALTH PROFESSIONS	22151390	UNITED STATES	N	42552	42978	173	Other Research-Related	7/8/05 0:00	11/21/73 0:00	NIDCD	100038	Private	FALSE	FALSE	NIDCD	9561389	42991	PA-14-042	4R00DC014520-03	R00
NIA	10000003	4/15/20 0:00	PA-18-398	5K99AG062749-02	5	K99	AG	62749	2		BANDIERA FRANK	9/1/19 0:00	9/1/20 0:00	Behavior and Social Science of Aging Study Section[NIA-S]	14339525	4	PUBLIC HEALTH & PREV MEDICINE	608195277	D3LHU66KBLD5	608195277	D3LHU66KBLD5	US	35.9316	-79.057377	578206	U_OF_NORTH_CAROLINA_CHAPEL_HILL	CHAPEL HILL	NC	SCHOOLS OF PUBLIC HEALTH	275995023	UNITED STATES	N	43952	44075	866	Other Research-Related	7/12/05 0:00	6/15/99 0:00	NIA	36326	Public	FALSE	FALSE	NIA	10393777	##########	PA-18-590	4R00AG062749-04	R00
NINDS	7531100	6/18/08 0:00	PA-07-297	1K99NS060985-01A1	1	K99	NS	60985	1	A	RIDDLE ROBERT D	7/1/08 0:00	6/30/09 0:00	ZNS1-SRB-M(56)	7983160	2	GENETICS	161202122	LCLSJAGTNZQ7	161202122	LCLSJAGTNZQ7	US	43.068519	-89.400858	578503	U_OF_WISCONSIN-MADISON	MADISON	WI	EARTH SCIENCES/RESOURCES	537151218	UNITED STATES	N	39630	39994	853	Other Research-Related	6/30/05 0:00	3/16/43 0:00	NINDS	88830	public	TRUE	TRUE	NINDS	7842016	39991	PA-07-297	4R00NS060985-02	R00
NHLBI	9619395	43484	PA-16-193	5K99HL139996-02	5	K99	HL	139996	2		KALANTARI ROYA	43101	43830	NHLBI Mentored Transition to Independence Study Section[MTI(OA)]	14865897	12	INTERNAL MEDICINE/MEDICINE	73133571	GNJ7BBP73WE9	73133571	GNJ7BBP73WE9	US	42.275494	-83.743038	1506502	U_OF_MICHIGAN_AT_ANN_ARBOR	ANN ARBOR	MI	SCHOOLS OF MEDICINE	481091276	UNITED STATES	N	43466	43830	838	Other Research-Related	2019	132300	NHLBI	132300	Public	TRUE	TRUE	NHLBI	10073604	43836	PA-16-193	4R00HL139996-03	R00
NINR	7489951	6/12/08 0:00	PA-06-133	5K99NR010813-02	5	K99	NR	10813	2		WEGLICKI LINDA	9/1/07 0:00	5/31/09 0:00	Obstetrics and Maternal-Fetal Biology Study Section[CHHD-B]	7547183	18	PSYCHIATRY	4514360	MKAGLD59JRL1	4514360	MKAGLD59JRL1	US	40.440909	-79.959125	2059802	U_OF_PITTSBURGH_AT_PITTSBURGH	PITTSBURGH	PA	SCHOOLS OF MEDICINE	152133320	UNITED STATES	N	39600	39964	361	Other Research-Related	6/30/05 0:00	8/23/42 0:00	NINR	88625	Public	TRUE	TRUE	NINR	7777103	39954	PA-06-133	4R00NR010813-03	R00
NIMH	9674530	3/23/19 0:00	PA-16-193	5K99MH116115-02	5	K99	MH	116115	2		VAN'T VEER ASHLEE V	4/1/18 0:00	3/31/20 0:00	ZMH1-ERB-S(02)	12510494	33	NONE	92530369	RN64EPNH8JC6	92530369	RN64EPNH8JC6	US	34.070199	-118.45102	577505	U_OF_CALIFORNIA_LOS_ANGELES	LOS ANGELES	CA	SCHOOLS OF MEDICINE	900952000	UNITED STATES	N	43556	43921	242	Other Research-Related	7/11/05 0:00	10/9/51 0:00	NIMH	128483	Public	TRUE	TRUE	NIMH	10107959	43928	PA-16-193	4R00MH116115-03	R00
NIDCR	8418734	2/13/13 0:00	PAR-09-256	5K99DE022564-02	5	K99	DE	22564	2		FRIEDEN LESLIE A	4/1/12 0:00	3/31/14 0:00	NIDCR Special Grants Review Committee[DSR]	10879516	8	UnavaiLABle	73130411	FLJ7DQKLL226	73130411	FLJ7DQKLL226	US	42.363198	-71.068772	4907701	MASSACHUSETTS_GENERAL_HOSP	BOSTON	MA	Independent Hospitals	21142621	UNITED STATES	N	41365	41729	121	Other Research-Related	7/5/05 0:00	9/29/77 0:00	NIDCR	137970	Private	FALSE	FALSE	NIDCR	8848446	41841	PAR-09-256	4R00DE022564-03	R00
NCI	9312262	6/30/17 0:00	PA-15-083	5K99CA207871-02	5	K99	CA	207871	2		RADAEV SERGEY	7/6/16 0:00	11/30/18 0:00	Transition to Independence Study Section (I)[NCI-I]	12315149	12	UnavaiLABle	64931884	KUKXRCZ6NZC2	64931884	KUKXRCZ6NZC2	US	40.764045	-73.956024	5079202	SLOAN-KETTERING_INST_CAN_RES	NEW YORK	NY	Research Institutes	100656007	UNITED STATES	N	42917	43434	398	Other Research-Related	7/9/05 0:00	5/8/69 0:00	NCI	134904	Private	FALSE	FALSE	NCI	9814762	43439	PA-15-083	4R00CA207871-03	R00
NIEHS	8730652	8/22/14 0:00	PA-11-197	5K99ES021470-02	5	K99	ES	21470	2		FINN SYMMA	9/5/13 0:00	3/31/16 0:00	ZES1-LKB-K(K)	10734663	18	PEDIATRICS	9214214	HJD6G4D6TJY5	9214214	HJD6G4D6TJY5	US	37.426852	-122.17047	8046501	STANFORD_U	STANFORD	CA	SCHOOLS OF MEDICINE	943052004	UNITED STATES	N	41883	42460	113	Other Research-Related	7/6/05 0:00	3/24/47 0:00	NIEHS	126823	Private	FALSE	FALSE	NIEHS	9205288	42457	PA-11-197	4R00ES021470-03	R00
NICHD	10266768	9/21/20 0:00	PA-16-193	5K99HD096125-03	5	K99	HD	96125	3		ILEKIS JOHN V	9/1/19 0:00	9/30/21 0:00	Obstetrics and Maternal-Fetal Biology Study Section[CHHD-B]	14892264	52	OBSTETRICS & GYNECOLOGY	804355790	UYTTZT6G9DT1	804355790	UYTTZT6G9DT1	US	32.876991	-117.24087	577507	U_OF_CALIFORNIA_SAN_DIEGO	LA JOLLA	CA	SCHOOLS OF MEDICINE	920930621	UNITED STATES	N	44075	44469	865	Other Research-Related	7/12/05 0:00	8/14/66 0:00	NICHD	60858	public	FALSE	TRUE	NICHD	10468485	##########	PA-16-193	4R00HD096125-04	R00
NIDDK	8289614	4/24/12 0:00	PA-10-063	5K99DK087923-03	5	K99	DK	87923	3		BISHOP TERRY ROGERS	7/1/11 0:00	11/30/12 0:00	Kidney Urologic and Hematologic Diseases D Study Section[DDK-D]	10031071	7	INTERNAL MEDICINE/MEDICINE	605799469	HD1WMN6945W6	605799469	HD1WMN6945W6	US	47.660307	-122.315168	9087701	U_OF_WASHINGTON	SEATTLE	WA	SCHOOLS OF MEDICINE	981959472	UNITED STATES	N	41030	41243	847	Other Research-Related	7/4/05 0:00	5/29/46 0:00	NIDDK	90000	Public	TRUE	TRUE	NIDDK	8573597	41242	PA-10-063	4R00DK087923-04	R00
NIDDK	8532896	8/14/13 0:00	PA-11-197	5K99DK094873-02	5	K99	DK	94873	2		RANKIN TRACY L	9/1/12 0:00	8/31/15 0:00	Kidney Urologic and Hematologic Diseases D Study Section[DDK-D]	10733146	13	INTERNAL MEDICINE/MEDICINE	621889815	QHF5ZZ114M72	621889815	QHF5ZZ114M72	US	40.8415	-73.9414	1833205	COLUMBIA_U_HEALTH_SCI	NEW YORK	NY	SCHOOLS OF MEDICINE	100323725	UNITED STATES	N	41518	42247	847	Other Research-Related	7/5/05 0:00	10/24/40 0:00	NIDDK	87957	Private	TRUE	FALSE	NIDDK	9072614	42241	PA-11-197	4R00DK094873-03	R00
NIA	9623309	1/22/19 0:00	PA-16-193	5K99AG057792-02	5	K99	AG	57792	2		WISE BRADLEY C	2/1/18 0:00	8/31/20 0:00	Basic Neuroscience of Aging Study Section[NIA-N]	14839242	7	GENETICS	47006379	JDLVAVGYJQ21	47006379	JDLVAVGYJQ21	US	42.335672	-71.104237	3212902	HARVARD_MED_SCH	BOSTON	MA	SCHOOLS OF MEDICINE	21201616	UNITED STATES	N	43497	44074	866	Other Research-Related	7/11/05 0:00	5/17/70 0:00	NIA	98754	Private	FALSE	FALSE	NIA	10223531	44070	PA-16-193	4R00AG057792-03	R00
NHLBI	8840990	4/14/15 0:00	PA-11-197	5K99HL123021-02	5	K99	HL	123021	2		CARLSON DREW E	5/1/14 0:00	7/31/15 0:00	ZHL1-CSR-P(F1)	10865636	33	INTERNAL MEDICINE/MEDICINE	92530369	RN64EPNH8JC6	92530369	RN64EPNH8JC6	US	34.070199	-118.45102	577505	U_OF_CALIFORNIA_LOS_ANGELES	LOS ANGELES	CA	SCHOOLS OF MEDICINE	900952000	UNITED STATES	N	42125	42216	837	Other Research-Related	7/7/05 0:00	10/29/37 0:00	NHLBI	123390	Public	FALSE	FALSE	NHLBI	9171612	42387	PA-11-197	4R00HL123021-03	R00
NIAAA	8016629	40535	PA-09-036	5K99AA018697-02	5	K99	AA	18697	2		MATOCHIK JOHN A	40210	41152	Neuroscience and Behavior Study Section[AA-4]	9752655	4	PSYCHOLOGY	608195277	D3LHU66KBLD5	608195277	D3LHU66KBLD5	US	35.9316	-79.057377	578206	U_OF_NORTH_CAROLINA_CHAPEL_HILL	CHAPEL HILL	NC	SCHOOLS OF MEDICINE	275995023	UNITED STATES	N	40544	41152	273	Other Research-Related	2011	90000	NIAAA	90000	Public	TRUE	TRUE	NIAAA	8528819	41145		4R00AA018697-03	R00
NIMH	7619266	5/5/09 0:00	PA-07-297	5K99MH084277-02	5	K99	MH	84277	2		DESMOND NANCY L	5/2/08 0:00	4/30/10 0:00	ZNS1-SRB-M(52)	3149193	12	PHYSIOLOGY	94878337	KMH5K9V7S518	94878337	KMH5K9V7S518	US	37.767442	-122.413937	577508	U_OF_CALIFORNIA_SAN_FRANCISCO	SAN FRANCISCO	CA	SCHOOLS OF MEDICINE	941432510	UNITED STATES	N	39934	40298	281	Other Research-Related	7/1/05 0:00	11/21/33 0:00	NIMH	85428	public	FALSE	FALSE	NIMH	7998972	40318	PA-07-297	4R00MH084277-03	R00
NIA	10227218	5/3/21	PA-19-130	5K99AG065457-02	5	K99	AG	65457	2		SUTTERER MATTHEW	8/1/20	4/30/22	Basic Neuroscience of Aging Study Section[NIA-N]	15443703	12	NEUROLOGY	94878337	KMH5K9V7S518	94878337	KMH5K9V7S518	US	37.767442	-122.413937	577508	U_OF_CALIFORNIA_SAN_FRANCISCO	SAN FRANCISCO	CA	SCHOOLS OF MEDICINE	941432510	UNITED STATES	N	5/1/21	4/30/22	866	Other Research-Related	7/13/05 0:00	4/6/42 0:00	NIA	125010	public	TRUE	TRUE	NIA	10598662	5/17/22	PA-19-130	4R00AG065457-03	R00
NEI	9115610	42586	PA-14-042	5K99EY025732-02	5	K99	EY	25732	2		AGARWAL NEERAJ	42217	42947	ZEY1-VSN(02)	10819247	4	OPHTHALMOLOGY	44387793	TP7EK8DZV6N5	44387793	TP7EK8DZV6N5	US	36.007766	-78.926475	2221101	DUKE_U	DURHAM	NC	SCHOOLS OF MEDICINE	277054673	UNITED STATES	N	42583	42947	867	Other Research-Related	2016	118593	NEI	118593	Private	TRUE	FALSE	NEI	9610820	43157	PA-14-042	4R00EY025732-03	R00
NIAMS	9385849	7/28/17 0:00	PA-16-193	1K99AR070902-01A1	1	K99	AR	70902	1	A	ZHENG XINCHENG	7/1/17 0:00	6/30/18 0:00	Arthritis and Musculoskeletal and Skin Diseases Special Grants Study Section[AMS]	14141260	12	RADIATION-DIAGNOSTIC/ONCOLOGY	94878337	KMH5K9V7S518	94878337	KMH5K9V7S518	US	37.767442	-122.413937	577508	U_OF_CALIFORNIA_SAN_FRANCISCO	SAN FRANCISCO	CA	SCHOOLS OF MEDICINE	941432510	UNITED STATES	N	42917	43281	846	Other Research-Related	7/9/05 0:00	6/21/57 0:00	NIAMS	94041	public	TRUE	TRUE	NIAMS	9723310	43291	PA-16-193	4R00AR070902-02	R00
NIDDK	7456334	6/11/08 0:00	PA-06-133	5K99DK078756-02	5	K99	DK	78756	2		MARGOLIS RONALD N	7/1/07 0:00	6/30/10 0:00	Diabetes Endocrinology and Metabolic Diseases B Study Section[DDK-B]	8552815	52	INTERNAL MEDICINE/MEDICINE	804355790	UYTTZT6G9DT1	804355790	UYTTZT6G9DT1	US	32.876991	-117.24087	577507	U_OF_CALIFORNIA_SAN_DIEGO	LA JOLLA	CA	SCHOOLS OF MEDICINE	920930621	UNITED STATES	N	39630	40359	847	Other Research-Related	6/30/05 0:00	1/27/35 0:00	NIDDK	85860	public	TRUE	TRUE	NIDDK	8138837	40444	PA-10-063	4R00DK078756-03	R00
NEI	9341328	8/31/17 0:00	PA-15-083	5K99EY027016-02	5	K99	EY	27016	2		AGARWAL NEERAJ	9/1/16 0:00	2/28/19 0:00	ZEY1-VSN(05)	15997449	12	BIOLOGY	41968306	NX9PXMKW5KW8	41968306	NX9PXMKW5KW8	US	40.729659	-73.997018	5998301	NEW_YORK_U	NEW YORK	NY	SCHOOLS OF ARTS AND SCIENCES	100122300	UNITED STATES	N	42948	43524	867	Other Research-Related	7/9/05 0:00	10/10/71 0:00	NEI	135789	Private	TRUE	FALSE	NEI	9919827	43601	PA-15-083	4R00EY027016-03	R00
NIDA	9759895	7/24/19 0:00	PA-16-193	5K99DA045749-02	5	K99	DA	45749	2		WALTON KEVIN	8/15/18 0:00	10/31/20 0:00	ZDA1-SXM-M(02)S	12192607	33	NONE	92530369	RN64EPNH8JC6	92530369	RN64EPNH8JC6	US	34.070199	-118.45102	577505	U_OF_CALIFORNIA_LOS_ANGELES	LOS ANGELES	CA	SCHOOLS OF MEDICINE	900952000	UNITED STATES	N	43678	44135	279	Other Research-Related	7/11/05 0:00	5/24/99 0:00	NIDA	182401	Public	TRUE	TRUE	NIDA	10291981	##########	PA-16-193	4R00DA045749-03	R00
NHGRI	9119156	8/1/16 0:00	PA-14-042	5K99HG008662-02	5	K99	HG	8662	2		PAZIN MICHAEL J	8/1/15 0:00	8/31/16 0:00	Genome Research Study Section[GNOM-G]	10998547	18	GENETICS	9214214	HJD6G4D6TJY5	9214214	HJD6G4D6TJY5	US	37.426852	-122.17047	8046501	STANFORD_U	STANFORD	CA	SCHOOLS OF MEDICINE	943052004	UNITED STATES	N	42583	42613	172	Other Research-Related	7/8/05 0:00	4/2/07 0:00	NHGRI	2649	Private	FALSE	FALSE	NHGRI	9373126	42699	PA-14-042	4R00HG008662-03	R00
NIDCD	7683749	40014	PA-07-297	5K99DC009634-02	5	K99	DC	9634	2		SKLARE DAN	39686	40421	Communication Disorders Review Committee[CDRC]	8441719	18	PSYCHOLOGY	52184116	U3NKNFLNQ613	52184116	G4P3TF8PFH73; KZV2XNZZN3A8; MJ5BDF8KMQ43; U3NKNFLNQ613; U9C6D6YR7P69	US	40.442959	-79.941084	247601	CARNEGIE-MELLON_U	PITTSBURGH	PA	SCHOOLS OF ARTS AND SCIENCES	152133815	UNITED STATES	N	40026	40421	173	Other Research-Related	2009	87156	NIDCD	87156	Private	TRUE	FALSE	NIDCD	8109699	40407	PA-07-297	4R00DC009634-03	R00
NIAID	7356831	8/22/08 0:00	PA-07-297	1K99AI076346-01	1	K99	AI	76346	1		PARK EUN-CHUNG	9/1/08 0:00	6/30/09 0:00	Microbiology and Infectious Diseases B Research Study Section[MID-B]	7895629	5	MICROBIOLOGY/IMMUN/VIROLOGY	66469933	S352L5PJLMP8	66469933	S352L5PJLMP8	US	33.791247	-84.3249	2384501	EMORY_U	ATLANTA	GA	SCHOOLS OF MEDICINE	303221007	UNITED STATES	N	39692	39994	855	Other Research-Related	6/30/05 0:00	6/4/40 0:00	NIAID	87815	Private	FALSE	FALSE	NIAID	7777158	39987		4R00AI076346-02	R00
NINR	8501693	6/10/13 0:00	PA-11-197	5K99NR013176-02	5	K99	NR	13176	2		TULLY LOIS	7/1/12 0:00	6/30/14 0:00	Nursing Science Review Committee[NRRC(53)]	9766815	18	NEUROSURGERY	4514360	MKAGLD59JRL1	4514360	MKAGLD59JRL1	US	40.440909	-79.959125	2059802	U_OF_PITTSBURGH_AT_PITTSBURGH	PITTSBURGH	PA	SCHOOLS OF MEDICINE	152133320	UNITED STATES	N	41456	41820	361	Other Research-Related	7/5/05 0:00	5/1/41 0:00	NINR	88146	Public	TRUE	TRUE	NINR	8848214	41880	PA-11-197	4R00NR013176-03	R00
NIGMS	8353599	41151	PA-11-197	1K99GM102372-01	1	K99	GM	102372	1		GERRATANA BARBARA	41153	41517	ZGM1-BRT-X(KR)	10236149	7	BIOLOGY	47006379	JDLVAVGYJQ21	47006379	JDLVAVGYJQ21	US	42.335672	-71.104237	3212902	HARVARD_MED_SCH	BOSTON	MA	SCHOOLS OF MEDICINE	21201616	UNITED STATES	N	41153	41517	859	Other Research-Related	2012	90000	NIGMS	90000	Private	FALSE	FALSE	NIGMS	8724088	41527	PA-11-197	4R00GM102372-02	R00
NHLBI	8309178	41088	PA-10-063	5K99HL109247-02	5	K99	HL	109247	2		KAUFMANN PETER G	40756	41455	ZHL1-CSR-Z(M1)	10582344	12	PSYCHIATRY	94878337	KMH5K9V7S518	94878337	KMH5K9V7S518	US	37.767442	-122.413937	577508	U_OF_CALIFORNIA_SAN_FRANCISCO	SAN FRANCISCO	CA	SCHOOLS OF MEDICINE	941432510	UNITED STATES	N	41091	41455	837	Other Research-Related	2012	127440	NHLBI	127440	public	TRUE	TRUE	NHLBI	8683910	41467	PA-10-063	4R00HL109247-03	R00
NIDDK	9332370	8/16/17 0:00	PA-15-083	5K99DK110537-02	5	K99	DK	110537	2		LAUGHLIN MAREN R	9/1/16 0:00	8/15/18 0:00	Diabetes Endocrinology and Metabolic Diseases B Study Section[DDK-B]	11687931	12	PHYSIOLOGY	73133571	GNJ7BBP73WE9	73133571	GNJ7BBP73WE9	US	42.275494	-83.743038	1506502	U_OF_MICHIGAN_AT_ANN_ARBOR	ANN ARBOR	MI	SCHOOLS OF MEDICINE	481091276	UNITED STATES	N	42979	43327	847	Other Research-Related	7/9/05 0:00	7/25/38 0:00	NIDDK	87135	Public	FALSE	FALSE	NIDDK	9755735	43328	PA-15-083	4R00DK110537-03	R00
NICHD	9229568	6/22/17 0:00	PA-15-083	5K99HD086271-02	5	K99	HD	86271	2		HENKEN DEBORAH B	7/1/16 0:00	8/31/18 0:00	Developmental Biology Study Section[CHHD-C]	11649372	33	BIOCHEMISTRY	92530369	RN64EPNH8JC6	92530369	RN64EPNH8JC6	US	34.070199	-118.45102	577505	U_OF_CALIFORNIA_LOS_ANGELES	LOS ANGELES	CA	SCHOOLS OF ARTS AND SCIENCES	900952000	UNITED STATES	N	42917	43343	865	Other Research-Related	7/9/05 0:00	10/29/37 0:00	NICHD	123390	Public	FALSE	FALSE	NICHD	9748663	43351	PA-15-083	4R00HD086271-03	R00
NHLBI	9690835	43574	PA-16-193	5K99HL138301-02	5	K99	HL	138301	2		LIDMAN KARIN FREDRIKSSON	43221	43951	NHLBI Mentored Transition to Independence Study Section[MTI(JA)]	10881519	33	ANESTHESIOLOGY	92530369	RN64EPNH8JC6	92530369	RN64EPNH8JC6	US	34.070199	-118.45102	577505	U_OF_CALIFORNIA_LOS_ANGELES	LOS ANGELES	CA	SCHOOLS OF MEDICINE	900952000	UNITED STATES	N	43586	43951	837	Other Research-Related	2019	119648	NHLBI	119648	Public	FALSE	FALSE	NHLBI	10154068	44021	PA-16-193	4R00HL138301-03	R00
NIA	9997772	7/22/20 0:00	PA-16-193	5K99AG057797-02	5	K99	AG	57797	2		LUO YUAN	9/1/19 0:00	8/31/21 0:00	Basic Neuroscience of Aging Study Section[NIA-N]	11513040	52	RADIATION-DIAGNOSTIC/ONCOLOGY	804355790	UYTTZT6G9DT1	804355790	UYTTZT6G9DT1	US	32.876991	-117.24087	577507	U_OF_CALIFORNIA_SAN_DIEGO	LA JOLLA	CA	SCHOOLS OF MEDICINE	920930621	UNITED STATES	N	44075	44439	866	Other Research-Related	7/12/05 0:00	1/10/40 0:00	NIA	87669	public	FALSE	TRUE	NIA	10457085	##########	PA-16-193	4R00AG057797-03	R00
NINR	8130965	6/17/11 0:00	PA-09-036	5K99NR012232-02	5	K99	NR	12232	2		TIGNO XENIA	8/19/10 0:00	9/10/12 0:00	Nursing Science Review Committee[NRRC(47)]	10228432	7	OTHER HEALTH PROFESSIONS	605799469	HD1WMN6945W6	605799469	HD1WMN6945W6	US	47.660307	-122.315168	9087701	U_OF_WASHINGTON	SEATTLE	WA	SCHOOLS OF NURSING	981959472	UNITED STATES	N	40725	41162	361	Other Research-Related	7/3/05 0:00	12/23/44 0:00	NINR	89478	Public	TRUE	TRUE	NINR	8507352	41163		4R00NR012232-03	R00
NIA	9564808	5/31/18 0:00	PA-16-193	5K99AG056635-02	5	K99	AG	56635	2		NIELSEN LISBETH	9/15/17 0:00	8/31/19 0:00	Behavior and Social Science of Aging Study Section[NIA-S]	11895122	6	NONE	939017877	H1HYA8Z1NTM5	939017877	H1HYA8Z1NTM5	US	38.040959	-84.505885	2793601	U_OF_KENTUCKY	LEXINGTON	KY	ORGANIZED RESEARCH UNITS	405260001	UNITED STATES	N	43252	43708	866	Other Research-Related	7/10/05 0:00	1/28/00 0:00	NIA	109602	Public	FALSE	FALSE	NIA	10001089	43711	PA-16-193	4R00AG056635-03	R00
NIDA	8435395	2/14/13 0:00	PA-11-197	5K99DA031790-02	5	K99	DA	31790	2		LIN YU	3/1/12 0:00	6/30/13 0:00	Career Development Education and Training Study Section[NIDA-K]	9437263	1	NEUROSCIENCES	183710748	NHV3GTWSALA7	183710748	NHV3GTWSALA7	US	32.786754	-79.947265	7575301	MED_U_OF_SOUTH_CAROLINA	CHARLESTON	SC	SCHOOLS OF MEDICINE	294074636	UNITED STATES	N	41334	41455	279	Other Research-Related	7/5/05 0:00	3/3/29 0:00	NIDA	120228	Private	FALSE	FALSE	NIDA	8656833	41485	PA-11-197	4R00DA031790-03	R00
NIAAA	9385558	7/18/17 0:00	PA-16-193	1K99AA025384-01A1	1	K99	AA	25384	1	A	EGLI MARK	8/1/17 0:00	5/31/18 0:00	Neuroscience and Behavior Study Section[AA-4]	9481206	7	PSYCHOLOGY	1910777	FTMTDMBR29C7	1910777	FTMTDMBR29C7	US	39.325256	-76.605131	4134401	JOHNS_HOPKINS_U	BALTIMORE	MD	SCHOOLS OF ARTS AND SCIENCES	212182680	UNITED STATES	N	42948	43251	273	Other Research-Related	7/9/05 0:00	11/20/79 0:00	NIAAA	138752	Private	FALSE	FALSE	NIAAA	9682869	43264	PA-16-193	4R00AA025384-02	R00
NHLBI	8052730	3/3/11 0:00	PA-09-036	5K99HL097030-02	5	K99	HL	97030	2		CARLSON DREW E	4/1/10 0:00	3/31/12 0:00	ZHL1-CSR-Z(F2)	8159579	18	RADIATION-DIAGNOSTIC/ONCOLOGY	9214214	HJD6G4D6TJY5	9214214	HJD6G4D6TJY5	US	37.426852	-122.17047	8046501	STANFORD_U	STANFORD	CA	SCHOOLS OF MEDICINE	943052004	UNITED STATES	N	40634	40999	837	Other Research-Related	7/3/05 0:00	5/18/51 0:00	NHLBI	91815	Private	TRUE	FALSE	NHLBI	8430696	41081		4R00HL097030-03	R00
NIAID	8542378	5/13/13 0:00	PA-11-197	1K99AI104262-01A1	1	K99	AI	104262	1	A	CHURCH ELIZABETH S	5/15/13 0:00	4/30/14 0:00	AIDS Immunology and Pathogenesis Study Section[AIP]	9286260	12	UROLOGY	94878337	KMH5K9V7S518	94878337	KMH5K9V7S518	US	37.767442	-122.413937	577508	U_OF_CALIFORNIA_SAN_FRANCISCO	SAN FRANCISCO	CA	SCHOOLS OF MEDICINE	941432510	UNITED STATES	N	41409	41759	855	Other Research-Related	7/5/05 0:00	5/1/63 0:00	NIAID	132705	public	TRUE	TRUE	NIAID	8956470	41985	PA-11-197	4R00AI104262-02	R00
NCI	8703643	7/31/14 0:00	PA-11-197	5K99CA175690-02	5	K99	CA	175690	2		SCHMIDT MICHAEL K	8/1/13 0:00	10/31/14 0:00	Transition to Independence Study Section (I)[NCI-I]	10218360	2	INTERNAL MEDICINE/MEDICINE	9095365	LL8GLEVH6MG3	9095365	LL8GLEVH6MG3	US	40.764542	-111.850317	514002	U_OF_UTAH	SALT LAKE CITY	UT	SCHOOLS OF MEDICINE	841128906	UNITED STATES	N	41852	41943	398	Other Research-Related	7/6/05 0:00	8/18/78 0:00	NCI	101769	public	FALSE	FALSE	NCI	8965544	42031	PA-11-197	4R00CA175690-03	R00
NIEHS	8848074	4/29/15 0:00	PA-11-197	5K99ES023846-02	5	K99	ES	23846	2		REINLIB LESLIE J	6/1/14 0:00	5/31/16 0:00	ZES1-SET-J(K9)	11692632	12	OBSTETRICS & GYNECOLOGY	94878337	KMH5K9V7S518	94878337	KMH5K9V7S518	US	37.767442	-122.413937	577508	U_OF_CALIFORNIA_SAN_FRANCISCO	SAN FRANCISCO	CA	SCHOOLS OF MEDICINE	941432510	UNITED STATES	N	42156	42521	113	Other Research-Related	7/7/05 0:00	5/26/74 0:00	NIEHS	100224	public	TRUE	TRUE	NIEHS	9275568	42517	PA-11-197	4R00ES023846-03	R00
NIDCD	9012812	4/20/16 0:00	PA-14-042	5K99DC014516-02	5	K99	DC	14516	2		SULLIVAN SUSAN L	4/1/15 0:00	7/31/16 0:00	Communication Disorders Review Committee[CDRC]	8748356	13	NEUROSCIENCES	621889815	QHF5ZZ114M72	621889815	QHF5ZZ114M72	US	40.8415	-73.9414	1833205	COLUMBIA_U_HEALTH_SCI	NEW YORK	NY	SCHOOLS OF MEDICINE	100323725	UNITED STATES	N	42461	42582	173	Other Research-Related	7/8/05 0:00	8/24/80 0:00	NIDCD	175554	Private	FALSE	FALSE	NIDCD	9316134	42577	PA-14-042	4R00DC014516-03	R00
NIMH	9025583	12/9/15 0:00	PA-14-042	5K99MH104154-02	5	K99	MH	104154	2		ALLISON SUSANNAH	3/1/15 0:00	2/28/17 0:00	ZMH1-ERB-K(07)	10588894	4	NONE	608195277	D3LHU66KBLD5	608195277	D3LHU66KBLD5	US	35.9316	-79.057377	578206	U_OF_NORTH_CAROLINA_CHAPEL_HILL	CHAPEL HILL	NC	SCHOOLS OF PUBLIC HEALTH	275995023	UNITED STATES	N	42370	42794	242	Other Research-Related	7/8/05 0:00	12/15/29 0:00	NIMH	83991	Public	FALSE	TRUE	NIMH	9459435	42837	PA-14-042	4R00MH104154-03	R00
NIDA	8820411	2/4/15 0:00	PA-14-042	1K99DA037279-01A1	1	K99	DA	37279	1	A	BERTON OLIVIER	2/15/15 0:00	1/18/16 0:00	ZDA1-HXO-H(02)S	8665740	18	PSYCHIATRY	9214214	HJD6G4D6TJY5	9214214	HJD6G4D6TJY5	US	37.426852	-122.17047	8046501	STANFORD_U	STANFORD	CA	SCHOOLS OF MEDICINE	943052004	UNITED STATES	N	42050	42387	279	Other Research-Related	7/7/05 0:00	8/21/78 0:00	NIDA	174820	Private	FALSE	FALSE	NIDA	9185600	42404	PA-14-042	4R00DA037279-02	R00
NIDA	7363851	5/27/08 0:00	PA-07-297	1K99DA024135-01	1	K99	DA	24135	1		HARTSOCK PETER	6/1/08 0:00	7/31/09 0:00	ZDA1-GXM-A(35)	8838230	52	FAMILY MEDICINE	804355790	UYTTZT6G9DT1	804355790	UYTTZT6G9DT1	US	32.876991	-117.24087	577507	U_OF_CALIFORNIA_SAN_DIEGO	LA JOLLA	CA	SCHOOLS OF MEDICINE	920930621	UNITED STATES	N	39600	40025	279	Other Research-Related	6/30/05 0:00	5/29/46 0:00	NIDA	90000	public	TRUE	TRUE	NIDA	7799538	40024	PA-09-036	4R00DA024135-02	R00
NCI	8294521	7/4/12 0:00	PA-10-063	5K99CA151673-02	5	K99	CA	151673	2		SCHMIDT MICHAEL K	7/1/11 0:00	6/30/14 0:00	Institutional Training and Education Study Section (F)[NCI-F]	9835319	18	PATHOLOGY	9214214	HJD6G4D6TJY5	9214214	HJD6G4D6TJY5	US	37.426852	-122.17047	8046501	STANFORD_U	STANFORD	CA	SCHOOLS OF MEDICINE	943052004	UNITED STATES	N	41091	41820	398	Other Research-Related	7/4/05 0:00	7/12/16 0:00	NCI	152135	Private	FALSE	FALSE	NCI	8901596	41880	PA-10-063	4R00CA151673-03	R00
NHLBI	8898910	8/6/15 0:00	PA-11-197	5K99HL122515-02	5	K99	HL	122515	2		HUANG LI-SHIN	9/1/14 0:00	8/31/16 0:00	ZHL1-CSR-P(M1)	10346384	7	UnavaiLABle	623544785	H5G9NWEFHXN4	623544785	H5G9NWEFHXN4	US	42.363082	-71.087893	10021177	BROAD_INST_INC	CAMBRIDGE	MA	Research Institutes	21421027	UNITED STATES	N	42248	42613	837	Other Research-Related	7/7/05 0:00	5/1/61 0:00	NHLBI	131975	Private	FALSE	FALSE	NHLBI	9376979	42727	PA-11-197	4R00HL122515-03	R00
NIGMS	8927663	8/4/15 0:00	PA-11-197	5K99GM111744-02	5	K99	GM	111744	2		HAGAN ANN A	9/15/14 0:00	12/31/15 0:00	ZGM1-TWD-Y(KR)	10876378	7	GENETICS	47006379	JDLVAVGYJQ21	47006379	JDLVAVGYJQ21	US	42.335672	-71.104237	3212902	HARVARD_MED_SCH	BOSTON	MA	SCHOOLS OF MEDICINE	21201616	UNITED STATES	N	42217	42369	859	Other Research-Related	7/7/05 0:00	9/1/02 0:00	NIGMS	37500	Private	FALSE	FALSE	NIGMS	9204526	42395	PA-11-197	4R00GM111744-03	R00
NIDA	9223100	4/3/17 0:00	PA-16-077	1K99DA042895-01	1	K99	DA	42895	1		BERTON OLIVIER	5/1/17 0:00	5/31/18 0:00	ZDA1-SXM-M(01)S	9257498	7	PSYCHOLOGY	1910777	FTMTDMBR29C7	1910777	FTMTDMBR29C7	US	39.325256	-76.605131	4134401	JOHNS_HOPKINS_U	BALTIMORE	MD	SCHOOLS OF ARTS AND SCIENCES	212182680	UNITED STATES	N	42856	43251	279	Other Research-Related	7/9/05 0:00	4/28/80 0:00	NIDA	138912	Private	FALSE	FALSE	NIDA	9686874	43319	PA-16-077	4R00DA042895-02	R00
NIDCR	9733195	5/16/19 0:00	PA-16-193	5K99DE028019-02	5	K99	DE	28019	2		FRIEDEN LESLIE A	7/1/18 0:00	6/30/20 0:00	NIDCR Special Grants Review Committee[DSR]	11641494	12	DENTISTRY	41968306	NX9PXMKW5KW8	41968306	NX9PXMKW5KW8	US	40.729659	-73.997018	5998301	NEW_YORK_U	NEW YORK	NY	SCHOOLS OF DENTISTRY/ORAL HYGN	100122300	UNITED STATES	N	43647	44012	121	Other Research-Related	7/11/05 0:00	5/22/73 0:00	NIDCR	99855	Private	FALSE	FALSE	NIDCR	10088607	44004	PA-16-193	4R00DE028019-03	R00
NIA	9529340	6/30/18 0:00	PA-16-193	5K99AG056599-02	5	K99	AG	56599	2		KARRAKER AMELIA WILKES	7/15/17 0:00	6/30/19 0:00	Behavior and Social Science of Aging Study Section[NIA-S]	12509798	12	BIOSTATISTICS & OTHER MATH SCI	73133571	GNJ7BBP73WE9	73133571	GNJ7BBP73WE9	US	42.275494	-83.743038	1506502	U_OF_MICHIGAN_AT_ANN_ARBOR	ANN ARBOR	MI	ORGANIZED RESEARCH UNITS	481091276	UNITED STATES	N	43282	43646	866	Other Research-Related	7/10/05 0:00	3/22/62 0:00	NIA	132300	Public	FALSE	FALSE	NIA	9951485	43700	PA-16-193	4R00AG056599-03	R00
NCCIH	7661467	4/24/09 0:00	PA-07-297	5K99AT004196-02	5	K99	AT	4196	2		KHALSA PARTAP SINGH	8/1/08 0:00	5/31/10 0:00	ZAT1-LD(22)	7549861	18	OTHER HEALTH PROFESSIONS	4514360	MKAGLD59JRL1	4514360	MKAGLD59JRL1	US	40.440909	-79.959125	2059802	U_OF_PITTSBURGH_AT_PITTSBURGH	PITTSBURGH	PA	SCH ALLIED HEALTH PROFESSIONS	152133320	UNITED STATES	N	39965	40329	213	Other Research-Related	7/1/05 0:00	6/7/63 0:00	NCCIH	96218	Public	TRUE	TRUE	NCCIH	8103448	40421	PA-07-297	4R00AT004196-03	R00
NHGRI	9333402	7/27/17 0:00	PA-15-083	5K99HG008696-02	5	K99	HG	8696	2		BROOKS LISA	8/16/16 0:00	2/28/18 0:00	Genome Research Study Section[GNOM-G]	10610237	6	GENETICS	1912864	M1LVPE5GLSD9	1912864	M1LVPE5GLSD9	US	40.481906	-74.457066	1196203	RUTGERS_THE_STATE_U_OF_NJ	PISCATAWAY	NJ	SCHOOLS OF ARTS AND SCIENCES	88543925	UNITED STATES	N	42948	43159	172	Other Research-Related	7/9/05 0:00	6/13/03 0:00	NHGRI	37785	Public	TRUE	FALSE	NHGRI	9617314	43172	PA-15-083	4R00HG008696-03	R00
NINDS	9751994	7/11/19 0:00	PA-16-193	5K99NS107639-02	5	K99	NS	107639	2		SIEBER BETH-ANNE	8/1/18 0:00	12/31/20 0:00	NST-2 Study Section [NST-2]	12486141	7	MISCELLANEOUS	1425594	E2NYLCDML6V1	1425594	E2NYLCDML6V1	US	42.359128	-71.093339	4911501	MASSACHUSETTS_INST_OF_TECH	CAMBRIDGE	MA	ORGANIZED RESEARCH UNITS	21421029	UNITED STATES	N	43678	44196	853	Other Research-Related	7/11/05 0:00	1/25/56 0:00	NINDS	93528	Private	FALSE	FALSE	NINDS	10459694	##########	PA-16-193	4R00NS107639-03	R00
NIEHS	8923274	8/13/15 0:00	PA-11-197	5K99ES024340-02	5	K99	ES	24340	2		HOLLANDER JONATHAN	9/8/14 0:00	6/30/16 0:00	ZES1-LKB-J(KS)	11885985	7	GENETICS	149617367	UNVDZNFA8R29	149617367	UNVDZNFA8R29	US	42.335306	-71.102775	3212904	HARVARD_SCH_OF_PUBLIC_HEALTH	BOSTON	MA	SCHOOLS OF PUBLIC HEALTH	21156028	UNITED STATES	N	42248	42551	113	Other Research-Related	7/7/05 0:00	7/14/44 0:00	NIEHS	89316	Private	FALSE	FALSE	NIEHS	9262452	42543	PA-11-197	4R00ES024340-03	R00
NINDS	7658785	5/21/09 0:00	PA-07-297	5K99NS062953-02	5	K99	NS	62953	2		MITLER MERRILL	7/16/08 0:00	8/31/09 0:00	ZNS1-SRB-M(56)	3053278	1	NEUROSCIENCES	68552207	L6NFUM28LQM5	68552207	L6NFUM28LQM5	US	38.664368	-90.323797	9083901	WASHINGTON_U	SAINT LOUIS	MO	SCHOOLS OF MEDICINE	631304862	UNITED STATES	N	39995	40056	853	Other Research-Related	7/1/05 0:00	9/10/42 0:00	NINDS	88643	Private	FALSE	FALSE	NINDS	7991078	40142	PA-09-036	4R00NS062953-03	R00
NICHD	9780545	8/23/19 0:00	PA-16-193	5K99HD096050-02	5	K99	HD	96050	2		HENKEN DEBORAH B	9/7/18 0:00	10/31/19 0:00	Developmental Biology Study Section[CHHD-C]	12307713	12	UnavaiLABle	64931884	KUKXRCZ6NZC2	64931884	KUKXRCZ6NZC2	US	40.764045	-73.956024	5079202	SLOAN-KETTERING_INST_CAN_RES	NEW YORK	NY	Research Institutes	100656007	UNITED STATES	N	43709	43769	865	Other Research-Related	7/11/05 0:00	6/21/23 0:00	NICHD	118146	Private	FALSE	FALSE	NICHD	10004225	43713	PA-16-193	4R00HD096050-03	R00
NHLBI	7663157	6/22/09 0:00	PA-07-297	5K99HL091055-02	5	K99	HL	91055	2		COMMARATO MICHAEL	8/1/08 0:00	7/31/10 0:00	ZHL1-CSR-S(M1)	8880962	7	INTERNAL MEDICINE/MEDICINE	605799469	HD1WMN6945W6	605799469	HD1WMN6945W6	US	47.660307	-122.315168	9087701	U_OF_WASHINGTON	SEATTLE	WA	SCHOOLS OF MEDICINE	981959472	UNITED STATES	N	40026	40390	837	Other Research-Related	7/1/05 0:00	5/30/46 0:00	NHLBI	90001	Public	TRUE	TRUE	NHLBI	8097031	40407		4R00HL091055-03	R00
NIAID	10040017	7/1/20 0:00	PA-19-130	1K99AI154672-01	1	K99	AI	154672	1		RANALLO RYAN	7/1/20 0:00	8/31/21 0:00	Microbiology and Infectious Diseases B Research Study Section[MID-B]	14810648	5	UnavaiLABle	79917897	GYLUH9UXHDX5	79917897	GYLUH9UXHDX5	US	36.143784	-86.800995	10040927	VANDERBILT_U_MED_CTR	NASHVILLE	TN	Independent Hospitals	372320011	UNITED STATES	N	44013	44439	855	Other Research-Related	7/12/05 0:00	2/23/57 0:00	NIAID	93923	Private	FALSE	FALSE	NIAID	10447290	##########	PA-19-130	4R00AI154672-02	R00
NIDCR	7666757	7/29/09 0:00	PA-07-297	5K99DE018413-02	5	K99	DE	18413	2		FRIEDEN LESLIE A	8/1/08 0:00	7/31/10 0:00	NIDCR Special Grants Review Committee[DSR]	8732073	18	DENTISTRY	4514360	MKAGLD59JRL1	4514360	MKAGLD59JRL1	US	40.440909	-79.959125	2059802	U_OF_PITTSBURGH_AT_PITTSBURGH	PITTSBURGH	PA	SCHOOLS OF DENTISTRY/ORAL HYGN	152133320	UNITED STATES	N	40026	40390	121	Other Research-Related	7/1/05 0:00	10/8/39 0:00	NIDCR	87575	Public	TRUE	TRUE	NIDCR	8086398	40352	PA-07-297	4R00DE018413-03	R00
NHLBI	8635881	1/17/14 0:00	PA-11-197	1K99HL118215-01A1	1	K99	HL	118215	1	A	CARLSON DREW E	1/17/14 0:00	1/18/15 0:00	ZHL1-CSR-P(O1)	10213271	52	INTERNAL MEDICINE/MEDICINE	804355790	UYTTZT6G9DT1	804355790	UYTTZT6G9DT1	US	32.876991	-117.24087	577507	U_OF_CALIFORNIA_SAN_DIEGO	LA JOLLA	CA	SCHOOLS OF MEDICINE	920930621	UNITED STATES	N	41656	42022	837	Other Research-Related	7/6/05 0:00	3/20/32 0:00	NHLBI	84817	public	TRUE	TRUE	NHLBI	9096928	42240	PA-11-197	4R00HL118215-02	R00
NEI	9198015	8/9/17 0:00	PA-15-083	5K99EY026070-02	5	K99	EY	26070	2		AGARWAL NEERAJ	4/1/16 0:00	3/31/18 0:00	ZEY1-VSN(02)	12566728	7	PHYSIOLOGY	605799469	HD1WMN6945W6	605799469	HD1WMN6945W6	US	47.660307	-122.315168	9087701	U_OF_WASHINGTON	SEATTLE	WA	SCHOOLS OF MEDICINE	981959472	UNITED STATES	N	42826	43190	867	Other Research-Related	7/9/05 0:00	6/17/46 0:00	NEI	90019	Public	FALSE	FALSE	NEI	9674680	43216	PA-15-083	4R00EY026070-03	R00
NIDA	10395890	4/30/21	PA-20-272	3K99DA048970-02S1	3	K99	DA	48970	2	S	LIN YU	6/15/19	10/31/21		11642158	4	ANATOMY/CELL BIOLOGY	44387793	TP7EK8DZV6N5	44387793	TP7EK8DZV6N5	US	36.007766	-78.926475	2221101	DUKE_U	DURHAM	NC	SCHOOLS OF MEDICINE	277054673	UNITED STATES	N	6/1/21	10/31/21	279	Other Research-Related	7/13/05 0:00	10/5/33 0:00	NIDA	121905	Private	FALSE	FALSE	NIDA	10479478	1/26/22	PA-18-398	4R00DA048970-03	R00
NEI	7760075	1/26/10 0:00	PA-07-297	5K99EY018894-02	5	K99	EY	18894	2		STEINMETZ MICHAEL A	1/15/09 0:00	12/31/10 0:00	ZEY1-VSN(01)	7892660	18	NEUROSCIENCES	4514360	MKAGLD59JRL1	4514360	MKAGLD59JRL1	US	40.440909	-79.959125	2059802	U_OF_PITTSBURGH_AT_PITTSBURGH	PITTSBURGH	PA	SCHOOLS OF ARTS AND SCIENCES	152133320	UNITED STATES	N	40179	40543	867	Other Research-Related	7/2/05 0:00	5/4/50 0:00	NEI	91436	Public	FALSE	TRUE	NEI	8189126	40571	PA-10-063	4R00EY018894-03	R00
NIA	9326108	7/5/17 0:00	PA-15-083	5K99AG051764-02	5	K99	AG	51764	2		GERALD MELISSA S	8/15/16 0:00	9/15/17 0:00	Behavior and Social Science of Aging Study Section[NIA-S]	11319400	4	NONE	44387793	TP7EK8DZV6N5	44387793	TP7EK8DZV6N5	US	36.007766	-78.926475	2221101	DUKE_U	DURHAM	NC	ORGANIZED RESEARCH UNITS	277054673	UNITED STATES	N	42931	42993	866	Other Research-Related	7/9/05 0:00	7/31/49 0:00	NIA	127683	Private	FALSE	FALSE	NIA	9552972	42984	PA-15-083	4R00AG051764-03	R00
NCRR	7299214	8/9/07 0:00	PA-06-133	1K99RR024366-01	1	K99	RR	24366	1		SHEELEY DOUGLAS	8/10/07 0:00	7/31/08 0:00	ZGM1-BRT-9(KR)	8201277	13	CHEMISTRY	124726725	GS3YEVSS12N6	124726725	GS3YEVSS12N6	US	37.870017	-122.268624	577502	U_OF_CALIFORNIA_BERKELEY	BERKELEY	CA	SCHOOLS OF ARTS AND SCIENCES	947101749	UNITED STATES	N	39304	39660	389	Other Research-Related	6/29/05 0:00	1/20/21 0:00	NCRR	80740	public	FALSE	FALSE	NCRR	7651832	39668	PA-06-133	4R00RR024366-02	R00
NIMH	7643568	7/3/09 0:00	PA-07-297	1K99MH085946-01	1	K99	MH	85946	1		DESMOND NANCY L	7/6/09 0:00	5/31/10 0:00	ZMH1-ERB-L(01)	3140804	18	PSYCHIATRY	9214214	HJD6G4D6TJY5	9214214	HJD6G4D6TJY5	US	37.426852	-122.17047	8046501	STANFORD_U	STANFORD	CA	SCHOOLS OF MEDICINE	943052004	UNITED STATES	N	40000	40329	281	Other Research-Related	7/1/05 0:00	1/15/00 0:00	NIMH	146113	Private	TRUE	FALSE	NIMH	8098429	40400		4R00MH085946-02	R00
NIDDK	7800919	40400	PA-07-297	5K99DK083556-03	5	K99	DK	83556	3		PODSKALNY JUDITH M	39918	40724	Digestive Diseases and Nutrition C Study Section[DDK-C]	9496620	18	SURGERY	4514360	MKAGLD59JRL1	4514360	MKAGLD59JRL1	US	40.440909	-79.959125	2059802	U_OF_PITTSBURGH_AT_PITTSBURGH	PITTSBURGH	PA	SCHOOLS OF MEDICINE	152133320	UNITED STATES	N	40269	40724	847	Other Research-Related	2010	90000	NIDDK	90000	Public	TRUE	TRUE	NIDDK	8271008	40801	PA-07-297	4R00DK083556-04	R00
NIDA	9260773	5/1/17 0:00	PA-15-083	5K99DA041462-02	5	K99	DA	41462	2		LIN YU	5/1/16 0:00	4/30/18 0:00	ZDA1-SXM-M(03)S	9638250	1	NEUROSCIENCES	183710748	NHV3GTWSALA7	183710748	NHV3GTWSALA7	US	32.786754	-79.947265	7575301	MED_U_OF_SOUTH_CAROLINA	CHARLESTON	SC	SCHOOLS OF MEDICINE	294074636	UNITED STATES	N	42856	43220	279	Other Research-Related	7/9/05 0:00	2/22/65 0:00	NIDA	133368	Private	FALSE	FALSE	NIDA	9645936	43308	PA-15-083	4R00DA041462-03	R00
NIGMS	10188788	3/17/21	PAR-19-343	1K99GM141365-01	1	K99	GM	141365	1		GIBBS KENNETH D	4/1/21	3/31/23	ZGM1-TWD-8(MK)	11775236	12	ANATOMY/CELL BIOLOGY	73133571	GNJ7BBP73WE9	73133571	GNJ7BBP73WE9	US	42.275494	-83.743038	1506502	U_OF_MICHIGAN_AT_ANN_ARBOR	ANN ARBOR	MI	SCHOOLS OF MEDICINE	481091276	UNITED STATES	N	4/1/21	3/31/22	859	Other Research-Related	2021	95436	NIGMS	95436	Public	TRUE	TRUE	NIGMS	10618620	6/20/22	PAR-19-343	4R00GM141365-03	R00
NCI	7959113	8/31/10 0:00	PA-09-036	1K99CA151672-01	1	K99	CA	151672	1		SCHMIDT MICHAEL K	9/1/10 0:00	7/31/11 0:00	Institutional Training and Education Study Section (F)[NCI-F]	7010738	5	GENETICS	555917996	KABJZBBJ4B54	555917996	KABJZBBJ4B54	US	44.975143	-93.227003	1450402	U_OF_MINNESOTA	MINNEAPOLIS	MN	SCHOOLS OF MEDICINE	554552070	UNITED STATES	N	40422	40755	398	Other Research-Related	7/2/05 0:00	12/9/79 0:00	NCI	102247	Public	TRUE	TRUE	NCI	8281731	40771	PA-10-063	4R00CA151672-02	R00
NIMH	8795226	42028	PA-11-197	5K99MH102357-02	5	K99	MH	102357	2		DESMOND NANCY L	41671	42400	ZMH1-ERB-L(05)	9699526	33	NEUROLOGY	92530369	RN64EPNH8JC6	92530369	RN64EPNH8JC6	US	34.070199	-118.45102	577505	U_OF_CALIFORNIA_LOS_ANGELES	LOS ANGELES	CA	SCHOOLS OF MEDICINE	900952000	UNITED STATES	N	42036	42400	242	Other Research-Related	2015	117990	NIMH	117990	Public	FALSE	FALSE	NIMH	9174923	42459	PA-11-197	4R00MH102357-03	R00
NIAID	7318266	39302	PA-06-133	1K99AI072945-01A1	1	K99	AI	72945	1	A	PROGRAIS LAWRENCE J	39309	39660	Allergy Immunology and Transplantation Research Committee[AITC]	8623839	3	MICROBIOLOGY/IMMUN/VIROLOGY	43207562	FL6GV84CKN57	43207562	FL6GV84CKN57	US	41.310925	-72.926428	9420201	YALE_U	NEW HAVEN	CT	SCHOOLS OF MEDICINE	65208327	UNITED STATES	N	39309	39660	855	Other Research-Related	2007	89996	NIAID	89996	Private	TRUE	FALSE	NIAID	7589922	39629		4R00AI072945-02	R00
NCI	9305010	6/20/17 0:00	PA-15-083	5K99CA207727-02	5	K99	CA	207727	2		SCHMIDT MICHAEL K	7/1/16 0:00	1/14/19 0:00	Transition to Independence Study Section (I)[NCI-I]	12619357	7	BIOLOGY	47006379	JDLVAVGYJQ21	47006379	JDLVAVGYJQ21	US	42.335672	-71.104237	3212902	HARVARD_MED_SCH	BOSTON	MA	SCHOOLS OF MEDICINE	21201616	UNITED STATES	N	42917	43479	398	Other Research-Related	7/9/05 0:00	10/10/54 0:00	NCI	166104	Private	TRUE	FALSE	NCI	9814769	43479	PA-15-083	4R00CA207727-03	R00
NIEHS	9763574	8/5/19 0:00	PA-16-193	5K99ES029537-02	5	K99	ES	29537	2		SHREFFLER CAROL A	9/1/18 0:00	10/31/19 0:00	ZES1-LAT-D(K1)	12420986	3	VETERINARY SCIENCES	47120084	TX2DAGQPENZ5	47120084	TX2DAGQPENZ5	US	38.543366	-121.72946	577503	U_OF_CALIFORNIA_AT_DAVIS	DAVIS	CA	SCHOOLS OF VETERINARY MEDICINE	956186153	UNITED STATES	N	43709	43769	113	Other Research-Related	7/11/05 0:00	6/26/61 0:00	NIEHS	95507	Public	FALSE	FALSE	NIEHS	10055230	43990	PA-16-193	4R00ES029537-03	R00
NIGMS	8914017	8/13/15 0:00	PA-11-197	5K99GM111767-02	5	K99	GM	111767	2		FLICKER PAULA F	8/18/14 0:00	12/31/15 0:00	ZGM1-TWD-Y(KR)	11953677	5	BIOCHEMISTRY	616845814	MXLZGAMFEKN5	616845814	MXLZGAMFEKN5	US	42.366381	-71.254515	925301	BRANDEIS_U	WALTHAM	MA	SCHOOLS OF ARTS AND SCIENCES	24532728	UNITED STATES	N	42217	42369	859	Other Research-Related	7/7/05 0:00	9/1/02 0:00	NIGMS	37500	Private	FALSE	FALSE	NIGMS	9199012	42408	PA-11-197	4R00GM111767-03	R00
NHLBI	8278792	6/7/12 0:00	PA-11-197	1K99HL112904-01	1	K99	HL	112904	1		SCOTT JANE	6/15/12 0:00	5/31/13 0:00	ZHL1-CSR-P(F1)	10093210	5	PHYSIOLOGY	65391526	JJG6HU8PA4S5	65391526	JJG6HU8PA4S5	US	38.050527	-78.500531	1526402	U_OF_VIRGINIA	CHARLOTTESVILLE	VA	SCHOOLS OF MEDICINE	229044195	UNITED STATES	N	41075	41425	837	Other Research-Related	7/4/05 0:00	5/29/46 0:00	NHLBI	90000	public	FALSE	FALSE	NHLBI	8660371	41473	PA-11-197	4R00HL112904-02	R00
NIMH	7394445	6/13/08 0:00	PA-06-133	5K99MH080003-02	5	K99	MH	80003	2		CHAVEZ MARK	7/1/07 0:00	6/30/09 0:00	ZMH1-ERB-H(03)	8362732	52	PSYCHIATRY	804355790	UYTTZT6G9DT1	804355790	UYTTZT6G9DT1	US	32.876991	-117.24087	577507	U_OF_CALIFORNIA_SAN_DIEGO	LA JOLLA	CA	SCHOOLS OF MEDICINE	920930621	UNITED STATES	N	39630	39994	281	Other Research-Related	6/30/05 0:00	7/12/85 0:00	NIMH	67765	public	TRUE	TRUE	NIMH	7781897	39979	PA-07-297	4R00MH080003-03	R00
NIAMS	9987529	7/10/20 0:00	PA-18-398	5K99AR073903-02	5	K99	AR	73903	2		NICKS KRISTY	8/1/19 0:00	9/30/21 0:00	Arthritis and Musculoskeletal and Skin Diseases Special Grants Study Section[AMS]	9526515	8	UnavaiLABle	73130411	FLJ7DQKLL226	73130411	FLJ7DQKLL226	US	42.363198	-71.068772	4907701	MASSACHUSETTS_GENERAL_HOSP	BOSTON	MA	Independent Hospitals	21142621	UNITED STATES	N	44044	44469	846	Other Research-Related	7/12/05 0:00	12/14/56 0:00	NIAMS	93852	Private	FALSE	FALSE	NIAMS	10531297	1/21/22	PA-18-398	4R00AR073903-03	R00
NIDCR	9095306	5/2/16 0:00	PA-14-042	5K99DE025088-02	5	K99	DE	25088	2		FRIEDEN LESLIE A	7/1/15 0:00	11/30/17 0:00	NIDCR Special Grants Review Committee[DSR]	9574643	18	DENTISTRY	4514360	MKAGLD59JRL1	4514360	MKAGLD59JRL1	US	40.440909	-79.959125	2059802	U_OF_PITTSBURGH_AT_PITTSBURGH	PITTSBURGH	PA	SCHOOLS OF DENTISTRY/ORAL HYGN	152133320	UNITED STATES	N	42522	43069	121	Other Research-Related	7/8/05 0:00	1/21/77 0:00	NIDCR	101195	Public	FALSE	TRUE	NIDCR	9576389	43074	PA-14-042	4R00DE025088-03	R00
NHLBI	8724554	6/18/14 0:00	PA-11-197	5K99HL118161-02	5	K99	HL	118161	2		CARLSON DREW E	8/21/13 0:00	6/30/15 0:00	ZHL1-CSR-P(F2)	10369513	33	INTERNAL MEDICINE/MEDICINE	92530369	RN64EPNH8JC6	92530369	RN64EPNH8JC6	US	34.070199	-118.45102	577505	U_OF_CALIFORNIA_LOS_ANGELES	LOS ANGELES	CA	SCHOOLS OF MEDICINE	900952000	UNITED STATES	N	41821	42185	837	Other Research-Related	7/6/05 0:00	9/2/47 0:00	NHLBI	90461	Public	FALSE	TRUE	NHLBI	9091818	42236	PA-11-197	4R00HL118161-03	R00
NIMH	8208994	11/29/11 0:00	PA-10-063	5K99MH090243-02	5	K99	MH	90243	2		CHAVEZ MARK	1/1/11 0:00	6/14/13 0:00	ZMH1-ERB-L(05)	9205903	53	PSYCHOLOGY	73371346	H59JKGFZKHL7	73371346	H59JKGFZKHL7	US	32.762178	-117.069156	513614	SAN_DIEGO_STATE_U	SAN DIEGO	CA	SCHOOLS OF ARTS AND SCIENCES	921821901	UNITED STATES	N	40909	41439	281	Other Research-Related	7/4/05 0:00	12/21/44 0:00	NIMH	89476	Public	FALSE	FALSE	NIMH	8580673	41436	PA-11-197	4R00MH090243-03	R00
NIMH	8235843	3/8/12 0:00	PA-10-063	5K99MH093459-02	5	K99	MH	93459	2		DESMOND NANCY L	3/4/11 0:00	8/31/12 0:00	ZMH1-ERB-L(01)	10506670	7	PSYCHIATRY	5436803	KG76WYENL5K1	5436803	KG76WYENL5K1	US	42.050479	-87.680046	6144650	NORTHWESTERN_U	CHICAGO	IL	SCHOOLS OF MEDICINE	606114579	UNITED STATES	N	40969	41152	281	Other Research-Related	7/4/05 0:00	8/23/42 0:00	NIMH	88625	Private	FALSE	FALSE	NIMH	8519638	41151	PA-10-063	4R00MH093459-03	R00
NICHD	9247239	3/28/17 0:00	PA-15-083	5K99HD086270-03	5	K99	HD	86270	3		KING ROSALIND B	9/1/16 0:00	8/31/17 0:00	Population Sciences Study Section[CHHD-W]	10340618	4	PUBLIC HEALTH & PREV MEDICINE	608195277	D3LHU66KBLD5	608195277	D3LHU66KBLD5	US	35.9316	-79.057377	578206	U_OF_NORTH_CAROLINA_CHAPEL_HILL	CHAPEL HILL	NC	SCHOOLS OF PUBLIC HEALTH	275995023	UNITED STATES	N	42826	42978	865	Other Research-Related	7/9/05 0:00	7/5/30 0:00	NICHD	120717	Public	TRUE	TRUE	NICHD	9533765	42953	PA-15-083	4R00HD086270-04	R00
NHLBI	7924105	40352	PA-07-297	5K99HL097155-02	5	K99	HL	97155	2		ROLTSCH MARK	39995	40724	ZHL1-CSR-Z(M3)	6755809	18	SURGERY	4514360	MKAGLD59JRL1	4514360	MKAGLD59JRL1	US	40.440909	-79.959125	2059802	U_OF_PITTSBURGH_AT_PITTSBURGH	PITTSBURGH	PA	SCHOOLS OF MEDICINE	152133320	UNITED STATES	N	40360	40724	837	Other Research-Related	2010	86886	NHLBI	86886	Public	TRUE	TRUE	NHLBI	8307148	40774	PA-07-297	4R00HL097155-03	R00
NHLBI	8479431	4/8/13 0:00	PA-11-197	5K99HL112852-02	5	K99	HL	112852	2		CARLSON DREW E	6/4/12 0:00	7/31/13 0:00	ZHL1-CSR-P(F1)	10911776	1	UnavaiLABle	71284913	JZD1HLM2ZU83	71284913	JZD1HLM2ZU83	US	39.140663	-84.501007	615001	CINCINNATI_CHILDRENS_HOSP_MED_CTR	CINCINNATI	OH	Independent Hospitals	452293039	UNITED STATES	N	41365	41486	837	Other Research-Related	7/5/05 0:00	9/27/59 0:00	NHLBI	131393	Private	TRUE	FALSE	NHLBI	8699321	41512	PA-11-197	4R00HL112852-03	R00
NEI	9371101	8/24/17 0:00	PA-16-193	1K99EY028222-01	1	K99	EY	28222	1		AGARWAL NEERAJ	9/1/17 0:00	8/31/18 0:00	ZEY1-VSN(03)	9468673	8	UnavaiLABle	73825945	NA7AKMLK2BM1	73825945	NA7AKMLK2BM1	US	42.36275	-71.07009	4905801	MASSACHUSETTS_EYE_&_EAR_INFIRMARY	BOSTON	MA	Independent Hospitals	21143002	UNITED STATES	N	42979	43343	867	Other Research-Related	7/9/05 0:00	11/24/59 0:00	NEI	94927	Private	FALSE	FALSE	NEI	9773318	43355	PA-16-193	4R00EY028222-02	R00
NEI	10229185	9/2/20 0:00	PA-18-591	3K99EY029013-02S1	3	K99	EY	29013	2	S	AGARWAL NEERAJ	9/30/18 0:00	6/30/21 0:00		12482020	12	ANATOMY/CELL BIOLOGY	121911077	M5SZJ6VHUHN8	121911077	M5SZJ6VHUHN8	US	40.669895	-73.974354	5998304	NEW_YORK_U_SCH_OF_MED	NEW YORK	NY	SCHOOLS OF MEDICINE	10016	UNITED STATES	N	44104	44377	867	Other Research-Related	7/12/05 0:00	7/1/71 0:00	NEI	62640	Private	TRUE	FALSE	NEI	10387323	##########	PA-16-193	4R00EY029013-03	R00
NIGMS	7784420	4/7/10 0:00		5K99GM087810-02	5	K99	GM	87810	2		FLICKER PAULA F	4/1/09 0:00	8/31/10 0:00	ZGM1-BRT-9(KR)	7358333	23	CHEMISTRY	872612445	G56PUALJ3KT5	872612445	CCV3WG2JG248; D4H1NV4APKP3; ELS2M3C6V2S5; EQA8NBEN9WD5; FFAZGE9NH3M8; G56PUALJ3KT5; K6JRCJJXFET1; M8FBSLHASMT3; P4LRVQT1H4K5; PJUVN8AT5416; RT1JPM9UMGM5; ZBMGUAZYFGC4; ZMP8BDLJTUW9	US	42.438	-76.4625	1514802	CORNELL_U	ITHACA	NY	SCHOOLS OF ARTS AND SCIENCES	148502820	UNITED STATES	N	40269	40421	859	Other Research-Related	7/2/05 0:00	9/1/02 0:00	NIGMS	37500	Private	FALSE	FALSE	NIGMS	8133576	40441	PA-10-063	4R00GM087810-03	R00
NIMH	10159614	1/12/21	PA-19-129	1K99MH123369-01A1	1	K99	MH	123369	1	A	SENN THERESA ELAINE	1/11/21	11/30/22	ZMH1-ERB-Q(08)	14626135	7	PUBLIC HEALTH & PREV MEDICINE	605799469	HD1WMN6945W6	605799469	HD1WMN6945W6	US	47.660307	-122.315168	9087701	U_OF_WASHINGTON	SEATTLE	WA	SCHOOLS OF MEDICINE	981959472	UNITED STATES	N	1/11/21	11/30/21	242	Other Research-Related	7/13/05 0:00	11/28/33 0:00	NIMH	121959	Public	TRUE	FALSE	NIMH	10550017	3/9/22	PA-19-129	4R00MH123369-03	R00
NCI	7713661	9/1/09 0:00	PA-07-297	1K99CA140789-01	1	K99	CA	140789	1		SCHMIDT MICHAEL K	9/1/09 0:00	8/31/10 0:00	Institutional Training and Education Study Section (F)[NCI-F]	9634644	7	ANATOMY/CELL BIOLOGY	47006379	JDLVAVGYJQ21	47006379	JDLVAVGYJQ21	US	42.335672	-71.104237	3212902	HARVARD_MED_SCH	BOSTON	MA	SCHOOLS OF MEDICINE	21201616	UNITED STATES	N	40057	40421	398	Other Research-Related	7/1/05 0:00	5/9/70 0:00	NCI	135270	Private	FALSE	FALSE	NCI	8122506	40414	PA-07-297	4R00CA140789-02	R00
[truncated: 1,867 more rows]
[truncated: 52 more columns]
